# Supplementary material
Source: publisher site journal article supplement (https://www.dovepress.com/article/420135)
Supplement: Supplementary file 1 [file get_supplementary_file.php]

Table S1.286 active ingredients and 2001 targets were acquired in the BATMAN-TCM database

| <b>Herb</b> | <b>Compound</b>                        | <b>Predicted targets</b> | <b>score</b> |
|-------------|----------------------------------------|--------------------------|--------------|
| NX          | Ecdysterone-3-O-Beta-D-Glucopyranoside | NR3C1                    | 48           |
| NX          | Ecdysterone-3-O-Beta-D-Glucopyranoside | ATP1A1                   | 48           |
| NX          | Rubrosterone                           | CYP17A1                  | 48           |
| NX          | Rubrosterone                           | PGR                      | 48           |
| NX          | Rubrosterone                           | PTGER3                   | 48           |
| NX          | Rubrosterone                           | SRD5A1                   | 48           |
| NX          | Rubrosterone                           | PTGER4                   | 48           |
| NX          | Rubrosterone                           | PTGER2                   | 48           |
| NX          | Rubrosterone                           | PRLR                     | 48           |
| NX          | Rubrosterone                           | ESR1                     | 48           |
| NX          | Rubrosterone                           | PTGER1                   | 48           |
| NX          | Rubrosterone                           | AR                       | 48           |
| NX          | Rubrosterone                           | NR3C1                    | 48           |
| NX          | Rubrosterone                           | OPRK1                    | 48           |
| NX          | Rubrosterone                           | HSD11B1                  | 48           |
| NX          | Rubrosterone                           | ANXA1                    | 48           |
| NX          | Rubrosterone                           | NR3C2                    | 48           |
| NX          | Dibutyl Phthalate                      | SCN10A                   | 80.882       |
| NX          | Dibutyl Phthalate                      | NRG1                     | 22.373       |
| NX          | Dibutyl Phthalate                      | SCN5A                    | 22.373       |
| NX          | Dibutyl Phthalate                      | SCN4B                    | 22.373       |
| NX          | Dibutyl Phthalate                      | FNTA                     | 22.373       |
| NX          | Dibutyl Phthalate                      | GJA5                     | 22.373       |
| NX          | Dibutyl Phthalate                      | ACHE                     | 80.882       |
| NX          | Dibutyl Phthalate                      | DMGDH                    | 22.373       |
| NX          | Dibutyl Phthalate                      | PRSS12                   | 22.373       |
| NX          | Dibutyl Phthalate                      | ASCL1                    | 22.373       |
| NX          | Dibutyl Phthalate                      | AGRN                     | 22.373       |
| NX          | Dibutyl Phthalate                      | GRIN1                    | 22.373       |
| NX          | Dibutyl Phthalate                      | BCHE                     | 80.882       |
| NX          | Dibutyl Phthalate                      | SIX3                     | 22.373       |
| NX          | Dibutyl Phthalate                      | SLC44A4                  | 22.373       |
| NX          | Dibutyl Phthalate                      | ENPP6                    | 22.373       |
| NX          | Dibutyl Phthalate                      | CHKA                     | 22.373       |
| NX          | Dibutyl Phthalate                      | COLQ                     | 55.444       |
| NX          | Dibutyl Phthalate                      | ANK2                     | 22.373       |
| NX          | Dibutyl Phthalate                      | ALDH7A1                  | 22.373       |
| NX          | Dibutyl Phthalate                      | CDH8                     | 22.373       |
| NX          | Dibutyl Phthalate                      | RYR2                     | 22.373       |
| NX          | Dibutyl Phthalate                      | SLC5A7                   | 22.373       |
| NX          | Dibutyl Phthalate                      | CRP                      | 22.373       |
| NX          | Dibutyl Phthalate                      | DNM3                     | 22.373       |
| NX          | Dibutyl Phthalate                      | KCNA5                    | 22.373       |
| NX          | Dibutyl Phthalate                      | CHDH                     | 22.373       |
| NX          | Chrysophanol                           | CFTR                     | 80.882       |
| NX          | Chrysophanol                           | CA7                      | 22.373       |
| NX          | Chrysophanol                           | CLN3                     | 22.373       |
| NX          | Chrysophanol                           | SEC61B                   | 22.373       |

|    |                                    |         |         |
|----|------------------------------------|---------|---------|
| NX | Chrysophanol                       | TCAF1   | 55.444  |
| NX | Chrysophanol                       | DNAJC3  | 22.373  |
| NX | Chrysophanol                       | TCAF2   | 22.373  |
| NX | Chrysophanol                       | KCNE2   | 55.444  |
| NX | Chrysophanol                       | ANO9    | 22.373  |
| NX | Chrysophanol                       | SLC26A3 | 22.373  |
| NX | Chrysophanol                       | HSD17B1 | 23      |
| NX | Chrysophanol                       | SLC26A6 | 22.373  |
| NX | Chrysophanol                       | SLC34A1 | 22.373  |
| NX | Chrysophanol                       | NOX1    | 22.373  |
| NX | Chrysophanol                       | FXYD1   | 22.373  |
| NX | Chrysophanol                       | CA2     | 22.373  |
| NX | Spinoside A                        | GLRA3   | 48      |
| NX | Spinoside A                        | NR3C1   | 48      |
| NX | Spinoside A                        | ATP1A1  | 48      |
| NX | Spinoside A                        | GABRB3  | 48      |
| NX | Ecdysterone                        | AR      | 122.778 |
| NX | Ecdysterone                        | PTGER1  | 48      |
| NX | Ecdysterone                        | PTGER2  | 48      |
| NX | Ecdysterone                        | SRD5A1  | 48      |
| NX | Ecdysterone                        | PTGER4  | 48      |
| NX | Ecdysterone                        | PTGER3  | 48      |
| NX | Ecdysterone                        | CYP17A1 | 48      |
| NX | Ecdysterone                        | PGR     | 48      |
| NX | Ecdysterone                        | ANXA1   | 48      |
| NX | Ecdysterone                        | PRLR    | 48      |
| NX | Ecdysterone                        | NR3C1   | 48      |
| NX | Ecdysterone                        | NR3C2   | 48      |
| NX | Ecdysterone                        | ESR1    | 48      |
| NX | Ecdysterone                        | OPRK1   | 48      |
| NX | Alpha-Spinasterol-Beta-D-Glucoside | ATP1A1  | 48      |
| NX | Inokosterone                       | AR      | 122.778 |
| NX | Inokosterone                       | PTGER1  | 48      |
| NX | Inokosterone                       | PTGER2  | 48      |
| NX | Inokosterone                       | PDE4A   | 23      |
| NX | Inokosterone                       | PDE4C   | 23      |
| NX | Inokosterone                       | NOTCH2  | 22.373  |
| NX | Inokosterone                       | ADA     | 22.373  |
| NX | Inokosterone                       | SRD5A1  | 48      |
| NX | Inokosterone                       | PTGER4  | 48      |
| NX | Inokosterone                       | PTGER3  | 48      |
| NX | Inokosterone                       | ADORA2A | 23      |
| NX | Inokosterone                       | PDE4B   | 23      |
| NX | Inokosterone                       | BIN3    | 22.373  |
| NX | Inokosterone                       | HAP1    | 22.373  |
| NX | Inokosterone                       | CYP17A1 | 48      |
| NX | Inokosterone                       | PGR     | 48      |
| NX | Inokosterone                       | ANXA1   | 48      |
| NX | Inokosterone                       | PDE4D   | 23      |
| NX | Inokosterone                       | ADORA1  | 23      |
| NX | Inokosterone                       | RIPK1   | 22.373  |

|    |                 |          |        |
|----|-----------------|----------|--------|
| NX | Inokosterone    | PRLR     | 48     |
| NX | Inokosterone    | NR3C1    | 48     |
| NX | Inokosterone    | NR3C2    | 48     |
| NX | Inokosterone    | PRKCA    | 23     |
| NX | Inokosterone    | PRKCD    | 23     |
| NX | Inokosterone    | ZRANB3   | 22.373 |
| NX | Inokosterone    | ESR1     | 48     |
| NX | Inokosterone    | OPRK1    | 48     |
| NX | Inokosterone    | PDE7B    | 23     |
| NX | Inokosterone    | PDE7A    | 23     |
| NX | Inokosterone    | HCAR2    | 22.373 |
| NX | Inokosterone    | TACR2    | 22.373 |
| DS | Tanshiquinone B | TNFSF11  | 80.882 |
| DS | Tanshiquinone B | GABRB1   | 80.882 |
| DS | Tanshiquinone B | GRIN2A   | 80.882 |
| DS | Tanshiquinone B | GABRG1   | 80.882 |
| DS | Tanshiquinone B | GABRA4   | 80.882 |
| DS | Tanshiquinone B | PTGS1    | 80.882 |
| DS | Tanshiquinone B | GABRA5   | 80.882 |
| DS | Tanshiquinone B | CHRFAM7A | 80.882 |
| DS | Tanshiquinone B | GRIN1    | 80.882 |
| DS | Tanshiquinone B | TP63     | 55.444 |
| DS | Tanshiquinone B | LTA      | 55.444 |
| DS | Tanshiquinone B | DCT      | 22.373 |
| DS | Tanshiquinone B | HMGA2    | 22.373 |
| DS | Tanshiquinone B | NAMPT    | 22.373 |
| DS | Tanshiquinone B | CSF1     | 22.373 |
| DS | Tanshiquinone B | FNDC5    | 22.373 |
| DS | Tanshiquinone B | MIF      | 22.373 |
| DS | Tanshiquinone B | SNAI1    | 22.373 |
| DS | Tanshiquinone B | LGALS3   | 22.373 |
| DS | Tanshiquinone B | METRNL   | 22.373 |
| DS | Tanshiquinone B | FGF7     | 22.373 |
| DS | Tanshiquinone B | SOX17    | 22.373 |
| DS | Tanshiquinone B | KCNA1    | 22.373 |
| DS | Tanshiquinone B | SHH      | 22.373 |
| DS | Tanshiquinone B | SPARC    | 22.373 |
| DS | Tanshiquinone B | S1PR2    | 22.373 |
| DS | Tanshiquinone B | PGR      | 22.373 |
| DS | Tanshiquinone B | ASXL2    | 22.373 |
| DS | Tanshiquinone B | WNT4     | 22.373 |
| DS | Tanshiquinone B | DRD2     | 22.373 |
| DS | Tanshiquinone B | LEP      | 22.373 |
| DS | Tanshiquinone B | IFNG     | 22.373 |
| DS | Tanshiquinone B | STAP1    | 22.373 |
| DS | Tanshiquinone B | ADIRF    | 22.373 |
| DS | Tanshiquinone B | KCNE5    | 22.373 |
| DS | Tanshiquinone B | INS      | 22.373 |
| DS | Tanshiquinone B | BGLAP    | 22.373 |
| DS | Tanshiquinone B | CYP4B1   | 22.373 |
| DS | Tanshiquinone B | ALOX15B  | 22.373 |

|    |                 |         |        |
|----|-----------------|---------|--------|
| DS | Tanshiquinone B | CDC20   | 22.373 |
| DS | Tanshiquinone B | PNPT1   | 22.373 |
| DS | Tanshiquinone B | GRIK5   | 22.373 |
| DS | Tanshiquinone B | HPN     | 22.373 |
| DS | Tanshiquinone B | FZD1    | 22.373 |
| DS | Tanshiquinone B | CDC42   | 22.373 |
| DS | Tanshiquinone B | IDO1    | 22.373 |
| DS | Tanshiquinone B | FGA     | 22.373 |
| DS | Tanshiquinone B | KDM6B   | 22.373 |
| DS | Tanshiquinone B | ALOX15  | 22.373 |
| DS | Tanshiquinone B | KCNQ1   | 22.373 |
| DS | Tanshiquinone B | SOX9    | 22.373 |
| DS | Tanshiquinone B | FAS     | 22.373 |
| DS | Tanshiquinone B | PRDM16  | 22.373 |
| DS | Tanshiquinone B | NFKB1   | 80.882 |
| DS | Tanshiquinone B | GABRG3  | 80.882 |
| DS | Tanshiquinone B | CYP11A1 | 80.882 |
| DS | Tanshiquinone B | FGFR2   | 80.882 |
| DS | Tanshiquinone B | GABRB2  | 80.882 |
| DS | Tanshiquinone B | ORM1    | 80.882 |
| DS | Tanshiquinone B | GABRA6  | 80.882 |
| DS | Tanshiquinone B | CRBN    | 80.882 |
| DS | Tanshiquinone B | FGF10   | 55.444 |
| DS | Tanshiquinone B | ADRA1B  | 55.444 |
| DS | Tanshiquinone B | CHRNA9  | 55.444 |
| DS | Tanshiquinone B | FBP1    | 22.373 |
| DS | Tanshiquinone B | CDK5R2  | 22.373 |
| DS | Tanshiquinone B | APOA2   | 22.373 |
| DS | Tanshiquinone B | CAPN5   | 22.373 |
| DS | Tanshiquinone B | NAV2    | 22.373 |
| DS | Tanshiquinone B | SNAI2   | 22.373 |
| DS | Tanshiquinone B | CYP1A2  | 22.373 |
| DS | Tanshiquinone B | KLF4    | 22.373 |
| DS | Tanshiquinone B | MAPK9   | 22.373 |
| DS | Tanshiquinone B | BMP15   | 22.373 |
| DS | Tanshiquinone B | BCL11A  | 22.373 |
| DS | Tanshiquinone B | EIF2AK1 | 22.373 |
| DS | Tanshiquinone B | SOSTDC1 | 22.373 |
| DS | Tanshiquinone B | FOXP3   | 22.373 |
| DS | Tanshiquinone B | GF11    | 22.373 |
| DS | Tanshiquinone B | ANGPT1  | 22.373 |
| DS | Tanshiquinone B | PEX14   | 22.373 |
| DS | Tanshiquinone B | IL1RN   | 22.373 |
| DS | Tanshiquinone B | HAS2    | 22.373 |
| DS | Tanshiquinone B | SRC     | 22.373 |
| DS | Tanshiquinone B | CHRNA2  | 22.373 |
| DS | Tanshiquinone B | SLC6A4  | 22.373 |
| DS | Tanshiquinone B | BDKRB2  | 22.373 |
| DS | Tanshiquinone B | COLQ    | 22.373 |
| DS | Tanshiquinone B | ACE     | 22.373 |
| DS | Tanshiquinone B | DRD4    | 22.373 |

|    |                 |         |        |
|----|-----------------|---------|--------|
| DS | Tanshiquinone B | STAR    | 22.373 |
| DS | Tanshiquinone B | CAV3    | 22.373 |
| DS | Tanshiquinone B | NCOA1   | 22.373 |
| DS | Tanshiquinone B | UGT3A2  | 22.373 |
| DS | Tanshiquinone B | GRIK4   | 22.373 |
| DS | Tanshiquinone B | KMT2A   | 22.373 |
| DS | Tanshiquinone B | BMP4    | 22.373 |
| DS | Tanshiquinone B | IL4     | 22.373 |
| DS | Tanshiquinone B | MECOM   | 22.373 |
| DS | Tanshiquinone B | SNCA    | 22.373 |
| DS | Tanshiquinone B | RYR2    | 22.373 |
| DS | Tanshiquinone B | SRSF6   | 22.373 |
| DS | Tanshiquinone B | CASQ2   | 22.373 |
| DS | Tanshiquinone B | OCSTAMP | 22.373 |
| DS | Tanshiquinone B | KISS1   | 22.373 |
| DS | Tanshiquinone B | CYP27B1 | 22.373 |
| DS | Tanshiquinone B | GABRA2  | 80.882 |
| DS | Tanshiquinone B | GRIN3B  | 80.882 |
| DS | Tanshiquinone B | SCN5A   | 80.882 |
| DS | Tanshiquinone B | GABRP   | 80.882 |
| DS | Tanshiquinone B | GRIN2C  | 80.882 |
| DS | Tanshiquinone B | PTGS2   | 80.882 |
| DS | Tanshiquinone B | GABRA1  | 80.882 |
| DS | Tanshiquinone B | CYP19A1 | 80.882 |
| DS | Tanshiquinone B | LEF1    | 55.444 |
| DS | Tanshiquinone B | FGFR1   | 55.444 |
| DS | Tanshiquinone B | RXRA    | 55.444 |
| DS | Tanshiquinone B | SCN2B   | 22.373 |
| DS | Tanshiquinone B | NDRG2   | 22.373 |
| DS | Tanshiquinone B | DIXDC1  | 22.373 |
| DS | Tanshiquinone B | AKR1C3  | 22.373 |
| DS | Tanshiquinone B | NFIB    | 22.373 |
| DS | Tanshiquinone B | AVPR1A  | 22.373 |
| DS | Tanshiquinone B | FASLG   | 22.373 |
| DS | Tanshiquinone B | WHSC1   | 22.373 |
| DS | Tanshiquinone B | ID2     | 22.373 |
| DS | Tanshiquinone B | TLR3    | 22.373 |
| DS | Tanshiquinone B | NPR3    | 22.373 |
| DS | Tanshiquinone B | IL1B    | 22.373 |
| DS | Tanshiquinone B | SCN10A  | 22.373 |
| DS | Tanshiquinone B | CAT     | 22.373 |
| DS | Tanshiquinone B | ADORA2B | 22.373 |
| DS | Tanshiquinone B | GREM1   | 22.373 |
| DS | Tanshiquinone B | TBR1    | 22.373 |
| DS | Tanshiquinone B | ADRA1D  | 22.373 |
| DS | Tanshiquinone B | DNM3    | 22.373 |
| DS | Tanshiquinone B | WNT2B   | 22.373 |
| DS | Tanshiquinone B | EGF     | 22.373 |
| DS | Tanshiquinone B | TGFB2   | 22.373 |
| DS | Tanshiquinone B | NEUROD2 | 22.373 |
| DS | Tanshiquinone B | MMP28   | 22.373 |

|    |                 |          |        |
|----|-----------------|----------|--------|
| DS | Tanshiquinone B | PHF14    | 22.373 |
| DS | Tanshiquinone B | GLI3     | 22.373 |
| DS | Tanshiquinone B | ATP13A2  | 22.373 |
| DS | Tanshiquinone B | IL10     | 22.373 |
| DS | Tanshiquinone B | RYR3     | 22.373 |
| DS | Tanshiquinone B | POU3F3   | 22.373 |
| DS | Tanshiquinone B | BCL2L1   | 22.373 |
| DS | Tanshiquinone B | GRIA3    | 22.373 |
| DS | Tanshiquinone B | AHCY     | 22.373 |
| DS | Tanshiquinone B | NAPRT    | 22.373 |
| DS | Tanshiquinone B | POU3F2   | 22.373 |
| DS | Tanshiquinone B | DRD1     | 22.373 |
| DS | Tanshiquinone B | CPLX2    | 22.373 |
| DS | Tanshiquinone B | ANXA1    | 22.373 |
| DS | Tanshiquinone B | GJA5     | 22.373 |
| DS | Tanshiquinone B | PEX5     | 22.373 |
| DS | Tanshiquinone B | GRM7     | 22.373 |
| DS | Tanshiquinone B | HSD17B3  | 22.373 |
| DS | Tanshiquinone B | GABRD    | 80.882 |
| DS | Tanshiquinone B | TNF      | 80.882 |
| DS | Tanshiquinone B | GABRE    | 80.882 |
| DS | Tanshiquinone B | GRIA2    | 80.882 |
| DS | Tanshiquinone B | GRIN2B   | 80.882 |
| DS | Tanshiquinone B | GABRB3   | 80.882 |
| DS | Tanshiquinone B | GABRG2   | 80.882 |
| DS | Tanshiquinone B | ORM2     | 80.882 |
| DS | Tanshiquinone B | APLN     | 55.444 |
| DS | Tanshiquinone B | EPHX2    | 55.444 |
| DS | Tanshiquinone B | SERPINB7 | 55.444 |
| DS | Tanshiquinone B | GPD1L    | 22.373 |
| DS | Tanshiquinone B | GRIA4    | 22.373 |
| DS | Tanshiquinone B | RGCC     | 22.373 |
| DS | Tanshiquinone B | CD74     | 22.373 |
| DS | Tanshiquinone B | HPX      | 22.373 |
| DS | Tanshiquinone B | GRIA1    | 22.373 |
| DS | Tanshiquinone B | CCL5     | 22.373 |
| DS | Tanshiquinone B | CLDN5    | 22.373 |
| DS | Tanshiquinone B | LILRB1   | 22.373 |
| DS | Tanshiquinone B | ESR1     | 22.373 |
| DS | Tanshiquinone B | MEF2C    | 22.373 |
| DS | Tanshiquinone B | DICER1   | 22.373 |
| DS | Tanshiquinone B | RIPK1    | 22.373 |
| DS | Tanshiquinone B | CLU      | 22.373 |
| DS | Tanshiquinone B | NPY5R    | 22.373 |
| DS | Tanshiquinone B | HRAS     | 22.373 |
| DS | Tanshiquinone B | HTR2C    | 22.373 |
| DS | Tanshiquinone B | VANGL2   | 22.373 |
| DS | Tanshiquinone B | PROC     | 22.373 |
| DS | Tanshiquinone B | AVP      | 22.373 |
| DS | Tanshiquinone B | CACNA1D  | 22.373 |
| DS | Tanshiquinone B | TIRAP    | 22.373 |

|    |                 |           |        |
|----|-----------------|-----------|--------|
| DS | Tanshiquinone B | ACHE      | 22.373 |
| DS | Tanshiquinone B | SMAD7     | 22.373 |
| DS | Tanshiquinone B | SCN4B     | 22.373 |
| DS | Tanshiquinone B | ANAPC2    | 22.373 |
| DS | Tanshiquinone B | HSD17B1   | 22.373 |
| DS | Tanshiquinone B | ADCY3     | 22.373 |
| DS | Tanshiquinone B | IL6       | 22.373 |
| DS | Tanshiquinone B | LRRK2     | 22.373 |
| DS | Tanshiquinone B | NPPA      | 22.373 |
| DS | Tanshiquinone B | FOXL2     | 22.373 |
| DS | Tanshiquinone B | SRD5A2    | 22.373 |
| DS | Tanshiquinone B | IKBKB     | 22.373 |
| DS | Tanshiquinone B | AGER      | 22.373 |
| DS | Tanshiquinone B | CX3CR1    | 22.373 |
| DS | Tanshiquinone B | CD34      | 22.373 |
| DS | Tanshiquinone B | CALCA     | 22.373 |
| DS | Tanshiquinone B | PTHLH     | 22.373 |
| DS | Tanshiquinone B | PDGFB     | 22.373 |
| DS | Tanshiquinone B | CYP1A1    | 22.373 |
| DS | Tanshiquinone B | CCM2L     | 22.373 |
| DS | Tanshiquinone B | CHRNA4    | 80.882 |
| DS | Tanshiquinone B | CHRNA7    | 80.882 |
| DS | Tanshiquinone B | GABRA3    | 80.882 |
| DS | Tanshiquinone B | CDH5      | 80.882 |
| DS | Tanshiquinone B | GABRQ     | 80.882 |
| DS | Tanshiquinone B | GRIN3A    | 80.882 |
| DS | Tanshiquinone B | GRIN2D    | 80.882 |
| DS | Tanshiquinone B | GRIK2     | 80.882 |
| DS | Tanshiquinone B | TNFRSF11A | 55.444 |
| DS | Tanshiquinone B | SCN1B     | 55.444 |
| DS | Tanshiquinone B | GRIK3     | 23     |
| DS | Tanshiquinone B | RELA      | 22.373 |
| DS | Tanshiquinone B | PAX3      | 22.373 |
| DS | Tanshiquinone B | SEMA4D    | 22.373 |
| DS | Tanshiquinone B | SCN3B     | 22.373 |
| DS | Tanshiquinone B | ARPIN     | 22.373 |
| DS | Tanshiquinone B | NKX3-1    | 22.373 |
| DS | Tanshiquinone B | ANK2      | 22.373 |
| DS | Tanshiquinone B | FZD2      | 22.373 |
| DS | Tanshiquinone B | NCKAP1L   | 22.373 |
| DS | Tanshiquinone B | TH        | 22.373 |
| DS | Tanshiquinone B | MAP2K5    | 22.373 |
| DS | Tanshiquinone B | PTGIS     | 22.373 |
| DS | Tanshiquinone B | SERPINB3  | 22.373 |
| DS | Tanshiquinone B | PRSS12    | 22.373 |
| DS | Tanshiquinone B | FADD      | 22.373 |
| DS | Tanshiquinone B | HEG1      | 22.373 |
| DS | Tanshiquinone B | WNT2      | 22.373 |
| DS | Tanshiquinone B | C5        | 22.373 |
| DS | Tanshiquinone B | FCER2     | 22.373 |
| DS | Tanshiquinone B | CDK5R1    | 22.373 |

|    |                 |         |        |
|----|-----------------|---------|--------|
| DS | Tanshiquinone B | GPR68   | 22.373 |
| DS | Tanshiquinone B | ROCK2   | 22.373 |
| DS | Tanshiquinone B | ANK3    | 22.373 |
| DS | Tanshiquinone B | UROD    | 22.373 |
| DS | Tanshiquinone B | FGFR4   | 22.373 |
| DS | Tanshiquinone B | WNT11   | 22.373 |
| DS | Tanshiquinone B | ATP6AP1 | 22.373 |
| DS | Tanshiquinone B | CDH8    | 22.373 |
| DS | Tanshiquinone B | ROCK1   | 22.373 |
| DS | Tanshiquinone B | KCNA5   | 22.373 |
| DS | Tanshiquinone B | TNFAIP3 | 22.373 |
| DS | Tanshiquinone B | NOD2    | 22.373 |
| DS | Tanshiquinone B | APOA1   | 22.373 |
| DS | Tanshiquinone B | LTF     | 22.373 |
| DS | Tanshiquinone B | CTNNB1  | 22.373 |
| DS | Tanshiquinone B | FGFR3   | 22.373 |
| DS | Tanshiquinone B | PARK2   | 22.373 |
| DS | Tanshiquinone B | FGFRL1  | 22.373 |
| DS | Tanshiquinone B | GRIK1   | 22.373 |
| DS | Tanshiquinone B | UGT1A1  | 22.373 |
| DS | Tanshiquinone B | FOS     | 22.373 |
| DS | Miltirone       | HTR4    | 80.882 |
| DS | Miltirone       | NQO2    | 80.882 |
| DS | Miltirone       | GGCX    | 80.882 |
| DS | Miltirone       | OPRM1   | 80.882 |
| DS | Miltirone       | HTR1A   | 80.882 |
| DS | Miltirone       | AGTR1   | 80.882 |
| DS | Miltirone       | AVP     | 55.444 |
| DS | Miltirone       | WLS     | 55.444 |
| DS | Miltirone       | PCK1    | 22.373 |
| DS | Miltirone       | CSF1    | 22.373 |
| DS | Miltirone       | FNDC5   | 22.373 |
| DS | Miltirone       | CA7     | 22.373 |
| DS | Miltirone       | SLC38A3 | 22.373 |
| DS | Miltirone       | RXFP4   | 22.373 |
| DS | Miltirone       | MAPK9   | 22.373 |
| DS | Miltirone       | MC4R    | 22.373 |
| DS | Miltirone       | MTNR1B  | 22.373 |
| DS | Miltirone       | MAS1    | 22.373 |
| DS | Miltirone       | S1PR2   | 22.373 |
| DS | Miltirone       | HEG1    | 22.373 |
| DS | Miltirone       | CDH5    | 22.373 |
| DS | Miltirone       | KCNK4   | 22.373 |
| DS | Miltirone       | SLC6A4  | 22.373 |
| DS | Miltirone       | HTR3D   | 22.373 |
| DS | Miltirone       | ANAPC2  | 22.373 |
| DS | Miltirone       | BICD1   | 22.373 |
| DS | Miltirone       | RET     | 22.373 |
| DS | Miltirone       | SOD2    | 22.373 |
| DS | Miltirone       | STATH   | 22.373 |
| DS | Miltirone       | TMBIM6  | 22.373 |



|    |           |          |        |
|----|-----------|----------|--------|
| DS | Miltirone | SNCA     | 22.373 |
| DS | Miltirone | ADORA1   | 22.373 |
| DS | Miltirone | EGFR     | 22.373 |
| DS | Miltirone | CCM2L    | 22.373 |
| DS | Miltirone | GABRA2   | 80.882 |
| DS | Miltirone | HTR1B    | 80.882 |
| DS | Miltirone | F10      | 80.882 |
| DS | Miltirone | AGTR2    | 80.882 |
| DS | Miltirone | PTGS2    | 80.882 |
| DS | Miltirone | VKORC1L1 | 80.882 |
| DS | Miltirone | PAX2     | 55.444 |
| DS | Miltirone | GPR27    | 55.444 |
| DS | Miltirone | ADCY6    | 22.373 |
| DS | Miltirone | IL34     | 22.373 |
| DS | Miltirone | ACIN1    | 22.373 |
| DS | Miltirone | ADRB2    | 22.373 |
| DS | Miltirone | CCL5     | 22.373 |
| DS | Miltirone | METRNL   | 22.373 |
| DS | Miltirone | LILRB1   | 22.373 |
| DS | Miltirone | CYP4F2   | 22.373 |
| DS | Miltirone | PPP1R1B  | 22.373 |
| DS | Miltirone | BMP6     | 22.373 |
| DS | Miltirone | EGR1     | 22.373 |
| DS | Miltirone | AGTRAP   | 22.373 |
| DS | Miltirone | TFPI     | 22.373 |
| DS | Miltirone | SOD1     | 22.373 |
| DS | Miltirone | ARRB1    | 22.373 |
| DS | Miltirone | NEUROD2  | 22.373 |
| DS | Miltirone | WNT11    | 22.373 |
| DS | Miltirone | ACSL4    | 22.373 |
| DS | Miltirone | LRRK2    | 22.373 |
| DS | Miltirone | MC5R     | 22.373 |
| DS | Miltirone | HTR3E    | 22.373 |
| DS | Miltirone | NAPRT    | 22.373 |
| DS | Miltirone | NCK1     | 22.373 |
| DS | Miltirone | ALOX15   | 22.373 |
| DS | Miltirone | CBR1     | 22.373 |
| DS | Miltirone | PROS1    | 80.882 |
| DS | Miltirone | GABRA3   | 80.882 |
| DS | Miltirone | VKORC1   | 80.882 |
| DS | Miltirone | BGLAP    | 80.882 |
| DS | Miltirone | HTR3A    | 80.882 |
| DS | Miltirone | F2       | 80.882 |
| DS | Miltirone | DAB2     | 55.444 |
| DS | Miltirone | SERPINB7 | 55.444 |
| DS | Miltirone | NAMPT    | 22.373 |
| DS | Miltirone | CIQTNF1  | 22.373 |
| DS | Miltirone | ANG      | 22.373 |
| DS | Miltirone | WT1      | 22.373 |
| DS | Miltirone | PLA2R1   | 22.373 |
| DS | Miltirone | PPP1R9B  | 22.373 |

|    |           |          |        |
|----|-----------|----------|--------|
| DS | Miltirone | PKD2     | 22.373 |
| DS | Miltirone | CRHBP    | 22.373 |
| DS | Miltirone | HTN1     | 22.373 |
| DS | Miltirone | MAOB     | 22.373 |
| DS | Miltirone | SERPINF2 | 22.373 |
| DS | Miltirone | BCL2     | 22.373 |
| DS | Miltirone | OXTR     | 22.373 |
| DS | Miltirone | CCS      | 22.373 |
| DS | Miltirone | AIF1     | 22.373 |
| DS | Miltirone | NMUR2    | 22.373 |
| DS | Miltirone | RPS6KA2  | 22.373 |
| DS | Miltirone | CDC20    | 22.373 |
| DS | Miltirone | SOD3     | 22.373 |
| DS | Miltirone | MC3R     | 22.373 |
| DS | Miltirone | DRD5     | 22.373 |
| DS | Miltirone | MECOM    | 22.373 |
| DS | Miltirone | ADIPOQ   | 22.373 |
| DS | Miltirone | ANXA1    | 22.373 |
| DS | Miltirone | HTR3C    | 22.373 |
| DS | Miltirone | PROZ     | 80.882 |
| DS | Miltirone | F7       | 80.882 |
| DS | Miltirone | JUN      | 80.882 |
| DS | Miltirone | PTGS1    | 80.882 |
| DS | Miltirone | GABRA1   | 80.882 |
| DS | Miltirone | AGT      | 55.444 |
| DS | Miltirone | MGP      | 55.444 |
| DS | Miltirone | ACTN2    | 55.444 |
| DS | Miltirone | RGCC     | 22.373 |
| DS | Miltirone | MC2R     | 22.373 |
| DS | Miltirone | CD36     | 22.373 |
| DS | Miltirone | HNF1B    | 22.373 |
| DS | Miltirone | CLDN5    | 22.373 |
| DS | Miltirone | HTR2B    | 22.373 |
| DS | Miltirone | AQP2     | 22.373 |
| DS | Miltirone | CYP11A1  | 22.373 |
| DS | Miltirone | ACE2     | 22.373 |
| DS | Miltirone | SIPA1    | 22.373 |
| DS | Miltirone | SPRY1    | 22.373 |
| DS | Miltirone | GAS6     | 22.373 |
| DS | Miltirone | PPP1R15A | 22.373 |
| DS | Miltirone | UTS2R    | 22.373 |
| DS | Miltirone | BDKRB2   | 22.373 |
| DS | Miltirone | INS      | 22.373 |
| DS | Miltirone | CD47     | 22.373 |
| DS | Miltirone | SPX      | 22.373 |
| DS | Miltirone | THRB     | 22.373 |
| DS | Miltirone | HTR3B    | 22.373 |
| DS | Miltirone | RFK      | 22.373 |
| DS | Miltirone | AGER     | 22.373 |
| DS | Miltirone | CPLX2    | 22.373 |
| DS | Miltirone | UBIAD1   | 22.373 |

|    |                   |          |        |
|----|-------------------|----------|--------|
| DS | Miltirone         | GLRA1    | 22.373 |
| DS | Miltirone         | AVPR1A   | 80.882 |
| DS | Miltirone         | F9       | 80.882 |
| DS | Miltirone         | PROC     | 80.882 |
| DS | Miltirone         | AVPR2    | 80.882 |
| DS | Miltirone         | NQO1     | 80.882 |
| DS | Miltirone         | CBR4     | 55.444 |
| DS | Miltirone         | F3       | 55.444 |
| DS | Miltirone         | NDRG2    | 22.373 |
| DS | Miltirone         | HACD1    | 22.373 |
| DS | Miltirone         | UTS2     | 22.373 |
| DS | Miltirone         | SDC4     | 22.373 |
| DS | Miltirone         | OXT      | 22.373 |
| DS | Miltirone         | DCSTAMP  | 22.373 |
| DS | Miltirone         | COMT     | 22.373 |
| DS | Miltirone         | MC1R     | 22.373 |
| DS | Miltirone         | PTGIS    | 22.373 |
| DS | Miltirone         | CYP4F11  | 22.373 |
| DS | Miltirone         | AMELX    | 22.373 |
| DS | Miltirone         | HRH3     | 22.373 |
| DS | Miltirone         | CTNNBIP1 | 22.373 |
| DS | Miltirone         | PLA2G1B  | 22.373 |
| DS | Miltirone         | ACVR2A   | 22.373 |
| DS | Miltirone         | HCRT     | 22.373 |
| DS | Miltirone         | ACE      | 22.373 |
| DS | Miltirone         | ALOX15B  | 22.373 |
| DS | Miltirone         | UGT3A2   | 22.373 |
| DS | Miltirone         | REN      | 22.373 |
| DS | Miltirone         | SPRY2    | 22.373 |
| DS | Miltirone         | NCK2     | 22.373 |
| DS | Miltirone         | FGA      | 22.373 |
| DS | Miltirone         | CA2      | 22.373 |
| DS | Miltirone         | AVPR1B   | 22.373 |
| DS | Miltirone         | PRDM16   | 22.373 |
| DS | Isocucurbitacin D | SRD5A1   | 48     |
| DS | Isocucurbitacin D | AR       | 48     |
| DS | Isocucurbitacin D | PTGFR    | 48     |
| DS | Isocucurbitacin D | NOTCH2   | 22.373 |
| DS | Isocucurbitacin D | ESR1     | 48     |
| DS | Isocucurbitacin D | NR3C1    | 48     |
| DS | Isocucurbitacin D | HSD11B1  | 48     |
| DS | Isocucurbitacin D | BIN3     | 22.373 |
| DS | Isocucurbitacin D | PTGER1   | 48     |
| DS | Isocucurbitacin D | PTGIR    | 48     |
| DS | Isocucurbitacin D | ANXA1    | 48     |
| DS | Isocucurbitacin D | ZRANB3   | 22.373 |
| DS | Isocucurbitacin D | PTGER4   | 48     |
| DS | Isocucurbitacin D | PTGER2   | 48     |
| DS | Isocucurbitacin D | ATP1A1   | 23     |
| DS | Isocucurbitacin D | PGR      | 48     |
| DS | Isocucurbitacin D | PTGER3   | 48     |

|    |                           |          |        |
|----|---------------------------|----------|--------|
| DS | Isocurbitacin D           | HCAR2    | 22.373 |
| DS | Monomethyl Lithospermate  | IMPDH1   | 23     |
| DS | Monomethyl Lithospermate  | IMPDH2   | 23     |
| DS | Salonitenolide            | PRKCA    | 48     |
| DS | Salonitenolide            | HDAC2    | 23     |
| DS | Salonitenolide            | HMGCR    | 48     |
| DS | Salonitenolide            | PRKCD    | 48     |
| DS | Salonitenolide            | ITGB2    | 23     |
| DS | Salonitenolide            | ITGAL    | 23     |
| DS | Magnesium Lithospermate B | IMPDH1   | 23     |
| DS | Magnesium Lithospermate B | IMPDH2   | 23     |
| DS | Miltionone I              | TNFSF11  | 80.882 |
| DS | Miltionone I              | GABRB1   | 80.882 |
| DS | Miltionone I              | GRIN2A   | 80.882 |
| DS | Miltionone I              | GABRG1   | 80.882 |
| DS | Miltionone I              | GABRA4   | 80.882 |
| DS | Miltionone I              | PTGS1    | 80.882 |
| DS | Miltionone I              | GABRA5   | 80.882 |
| DS | Miltionone I              | CHRFAM7A | 80.882 |
| DS | Miltionone I              | GRIN1    | 80.882 |
| DS | Miltionone I              | TP63     | 55.444 |
| DS | Miltionone I              | LTA      | 55.444 |
| DS | Miltionone I              | DCT      | 22.373 |
| DS | Miltionone I              | HMGA2    | 22.373 |
| DS | Miltionone I              | NAMPT    | 22.373 |
| DS | Miltionone I              | CSF1     | 22.373 |
| DS | Miltionone I              | FNDC5    | 22.373 |
| DS | Miltionone I              | MIF      | 22.373 |
| DS | Miltionone I              | SNAI1    | 22.373 |
| DS | Miltionone I              | LGALS3   | 22.373 |
| DS | Miltionone I              | METRNL   | 22.373 |
| DS | Miltionone I              | FGF7     | 22.373 |
| DS | Miltionone I              | SOX17    | 22.373 |
| DS | Miltionone I              | KCNA1    | 22.373 |
| DS | Miltionone I              | SHH      | 22.373 |
| DS | Miltionone I              | SPARC    | 22.373 |
| DS | Miltionone I              | S1PR2    | 22.373 |
| DS | Miltionone I              | PGR      | 22.373 |
| DS | Miltionone I              | ASXL2    | 22.373 |
| DS | Miltionone I              | WNT4     | 22.373 |
| DS | Miltionone I              | DRD2     | 22.373 |
| DS | Miltionone I              | LEP      | 22.373 |
| DS | Miltionone I              | IFNG     | 22.373 |
| DS | Miltionone I              | STAP1    | 22.373 |
| DS | Miltionone I              | ADIRF    | 22.373 |
| DS | Miltionone I              | KCNE5    | 22.373 |
| DS | Miltionone I              | INS      | 22.373 |
| DS | Miltionone I              | BGLAP    | 22.373 |
| DS | Miltionone I              | CYP4B1   | 22.373 |
| DS | Miltionone I              | ALOX15B  | 22.373 |
| DS | Miltionone I              | CDC20    | 22.373 |

|    |              |         |        |
|----|--------------|---------|--------|
| DS | Miltionone I | PNPT1   | 22.373 |
| DS | Miltionone I | GRIK5   | 22.373 |
| DS | Miltionone I | HPN     | 22.373 |
| DS | Miltionone I | FZD1    | 22.373 |
| DS | Miltionone I | CDC42   | 22.373 |
| DS | Miltionone I | IDO1    | 22.373 |
| DS | Miltionone I | FGA     | 22.373 |
| DS | Miltionone I | KDM6B   | 22.373 |
| DS | Miltionone I | ALOX15  | 22.373 |
| DS | Miltionone I | KCNQ1   | 22.373 |
| DS | Miltionone I | SOX9    | 22.373 |
| DS | Miltionone I | FAS     | 22.373 |
| DS | Miltionone I | PRDM16  | 22.373 |
| DS | Miltionone I | NFKB1   | 80.882 |
| DS | Miltionone I | GABRG3  | 80.882 |
| DS | Miltionone I | CYP11A1 | 80.882 |
| DS | Miltionone I | FGFR2   | 80.882 |
| DS | Miltionone I | GABRB2  | 80.882 |
| DS | Miltionone I | ORM1    | 80.882 |
| DS | Miltionone I | GABRA6  | 80.882 |
| DS | Miltionone I | CRBN    | 80.882 |
| DS | Miltionone I | FGF10   | 55.444 |
| DS | Miltionone I | ADRA1B  | 55.444 |
| DS | Miltionone I | CHRNA9  | 55.444 |
| DS | Miltionone I | FBP1    | 22.373 |
| DS | Miltionone I | CDK5R2  | 22.373 |
| DS | Miltionone I | APOA2   | 22.373 |
| DS | Miltionone I | CAPN5   | 22.373 |
| DS | Miltionone I | NAV2    | 22.373 |
| DS | Miltionone I | SNAI2   | 22.373 |
| DS | Miltionone I | CYP1A2  | 22.373 |
| DS | Miltionone I | KLF4    | 22.373 |
| DS | Miltionone I | MAPK9   | 22.373 |
| DS | Miltionone I | BMP15   | 22.373 |
| DS | Miltionone I | BCL11A  | 22.373 |
| DS | Miltionone I | EIF2AK1 | 22.373 |
| DS | Miltionone I | SOSTDC1 | 22.373 |
| DS | Miltionone I | FOXP3   | 22.373 |
| DS | Miltionone I | GF11    | 22.373 |
| DS | Miltionone I | ANGPT1  | 22.373 |
| DS | Miltionone I | PEX14   | 22.373 |
| DS | Miltionone I | IL1RN   | 22.373 |
| DS | Miltionone I | HAS2    | 22.373 |
| DS | Miltionone I | SRC     | 22.373 |
| DS | Miltionone I | CHRNA2  | 22.373 |
| DS | Miltionone I | SLC6A4  | 22.373 |
| DS | Miltionone I | BDKRB2  | 22.373 |
| DS | Miltionone I | COLQ    | 22.373 |
| DS | Miltionone I | ACE     | 22.373 |
| DS | Miltionone I | DRD4    | 22.373 |
| DS | Miltionone I | STAR    | 22.373 |

|    |              |         |        |
|----|--------------|---------|--------|
| DS | Miltionone I | CAV3    | 22.373 |
| DS | Miltionone I | NCOA1   | 22.373 |
| DS | Miltionone I | UGT3A2  | 22.373 |
| DS | Miltionone I | GRIK4   | 22.373 |
| DS | Miltionone I | KMT2A   | 22.373 |
| DS | Miltionone I | BMP4    | 22.373 |
| DS | Miltionone I | IL4     | 22.373 |
| DS | Miltionone I | MECOM   | 22.373 |
| DS | Miltionone I | SNCA    | 22.373 |
| DS | Miltionone I | RYR2    | 22.373 |
| DS | Miltionone I | SRSF6   | 22.373 |
| DS | Miltionone I | CASQ2   | 22.373 |
| DS | Miltionone I | OCSTAMP | 22.373 |
| DS | Miltionone I | KISS1   | 22.373 |
| DS | Miltionone I | CYP27B1 | 22.373 |
| DS | Miltionone I | GABRA2  | 80.882 |
| DS | Miltionone I | GRIN3B  | 80.882 |
| DS | Miltionone I | SCN5A   | 80.882 |
| DS | Miltionone I | GABRP   | 80.882 |
| DS | Miltionone I | GRIN2C  | 80.882 |
| DS | Miltionone I | PTGS2   | 80.882 |
| DS | Miltionone I | GABRA1  | 80.882 |
| DS | Miltionone I | CYP19A1 | 80.882 |
| DS | Miltionone I | LEF1    | 55.444 |
| DS | Miltionone I | FGFR1   | 55.444 |
| DS | Miltionone I | RXRA    | 55.444 |
| DS | Miltionone I | SCN2B   | 22.373 |
| DS | Miltionone I | NDRG2   | 22.373 |
| DS | Miltionone I | DIXDC1  | 22.373 |
| DS | Miltionone I | AKR1C3  | 22.373 |
| DS | Miltionone I | NFIB    | 22.373 |
| DS | Miltionone I | AVPR1A  | 22.373 |
| DS | Miltionone I | FASLG   | 22.373 |
| DS | Miltionone I | WHSC1   | 22.373 |
| DS | Miltionone I | ID2     | 22.373 |
| DS | Miltionone I | TLR3    | 22.373 |
| DS | Miltionone I | NPR3    | 22.373 |
| DS | Miltionone I | IL1B    | 22.373 |
| DS | Miltionone I | SCN10A  | 22.373 |
| DS | Miltionone I | CAT     | 22.373 |
| DS | Miltionone I | ADORA2B | 22.373 |
| DS | Miltionone I | GREM1   | 22.373 |
| DS | Miltionone I | TBR1    | 22.373 |
| DS | Miltionone I | ADRA1D  | 22.373 |
| DS | Miltionone I | DNM3    | 22.373 |
| DS | Miltionone I | WNT2B   | 22.373 |
| DS | Miltionone I | EGF     | 22.373 |
| DS | Miltionone I | TGFB2   | 22.373 |
| DS | Miltionone I | NEUROD2 | 22.373 |
| DS | Miltionone I | MMP28   | 22.373 |
| DS | Miltionone I | PHF14   | 22.373 |

|    |              |          |        |
|----|--------------|----------|--------|
| DS | Miltionone I | GLI3     | 22.373 |
| DS | Miltionone I | ATP13A2  | 22.373 |
| DS | Miltionone I | IL10     | 22.373 |
| DS | Miltionone I | RYR3     | 22.373 |
| DS | Miltionone I | POU3F3   | 22.373 |
| DS | Miltionone I | BCL2L1   | 22.373 |
| DS | Miltionone I | GRIA3    | 22.373 |
| DS | Miltionone I | AHCY     | 22.373 |
| DS | Miltionone I | NAPRT    | 22.373 |
| DS | Miltionone I | POU3F2   | 22.373 |
| DS | Miltionone I | DRD1     | 22.373 |
| DS | Miltionone I | CPLX2    | 22.373 |
| DS | Miltionone I | ANXA1    | 22.373 |
| DS | Miltionone I | GJA5     | 22.373 |
| DS | Miltionone I | PEX5     | 22.373 |
| DS | Miltionone I | GRM7     | 22.373 |
| DS | Miltionone I | HSD17B3  | 22.373 |
| DS | Miltionone I | GABRD    | 80.882 |
| DS | Miltionone I | TNF      | 80.882 |
| DS | Miltionone I | GABRE    | 80.882 |
| DS | Miltionone I | GRIA2    | 80.882 |
| DS | Miltionone I | GRIN2B   | 80.882 |
| DS | Miltionone I | GABRB3   | 80.882 |
| DS | Miltionone I | GABRG2   | 80.882 |
| DS | Miltionone I | ORM2     | 80.882 |
| DS | Miltionone I | APLN     | 55.444 |
| DS | Miltionone I | EPHX2    | 55.444 |
| DS | Miltionone I | SERPINB7 | 55.444 |
| DS | Miltionone I | GPD1L    | 22.373 |
| DS | Miltionone I | GRIA4    | 22.373 |
| DS | Miltionone I | RGCC     | 22.373 |
| DS | Miltionone I | CD74     | 22.373 |
| DS | Miltionone I | HPX      | 22.373 |
| DS | Miltionone I | GRIA1    | 22.373 |
| DS | Miltionone I | CCL5     | 22.373 |
| DS | Miltionone I | CLDN5    | 22.373 |
| DS | Miltionone I | LILRB1   | 22.373 |
| DS | Miltionone I | ESR1     | 22.373 |
| DS | Miltionone I | MEF2C    | 22.373 |
| DS | Miltionone I | DICER1   | 22.373 |
| DS | Miltionone I | RIPK1    | 22.373 |
| DS | Miltionone I | CLU      | 22.373 |
| DS | Miltionone I | NPY5R    | 22.373 |
| DS | Miltionone I | HRAS     | 22.373 |
| DS | Miltionone I | HTR2C    | 22.373 |
| DS | Miltionone I | VANGL2   | 22.373 |
| DS | Miltionone I | PROC     | 22.373 |
| DS | Miltionone I | AVP      | 22.373 |
| DS | Miltionone I | CACNA1D  | 22.373 |
| DS | Miltionone I | TIRAP    | 22.373 |
| DS | Miltionone I | ACHE     | 22.373 |

|    |              |           |        |
|----|--------------|-----------|--------|
| DS | Miltionone I | SMAD7     | 22.373 |
| DS | Miltionone I | SCN4B     | 22.373 |
| DS | Miltionone I | ANAPC2    | 22.373 |
| DS | Miltionone I | HSD17B1   | 22.373 |
| DS | Miltionone I | ADCY3     | 22.373 |
| DS | Miltionone I | IL6       | 22.373 |
| DS | Miltionone I | LRRK2     | 22.373 |
| DS | Miltionone I | NPPA      | 22.373 |
| DS | Miltionone I | FOXL2     | 22.373 |
| DS | Miltionone I | SRD5A2    | 22.373 |
| DS | Miltionone I | IKBKB     | 22.373 |
| DS | Miltionone I | AGER      | 22.373 |
| DS | Miltionone I | CX3CR1    | 22.373 |
| DS | Miltionone I | CD34      | 22.373 |
| DS | Miltionone I | CALCA     | 22.373 |
| DS | Miltionone I | PTHLH     | 22.373 |
| DS | Miltionone I | PDGFB     | 22.373 |
| DS | Miltionone I | CYP1A1    | 22.373 |
| DS | Miltionone I | CCM2L     | 22.373 |
| DS | Miltionone I | CHRNA4    | 80.882 |
| DS | Miltionone I | CHRNA7    | 80.882 |
| DS | Miltionone I | GABRA3    | 80.882 |
| DS | Miltionone I | CDH5      | 80.882 |
| DS | Miltionone I | GABRQ     | 80.882 |
| DS | Miltionone I | GRIN3A    | 80.882 |
| DS | Miltionone I | GRIN2D    | 80.882 |
| DS | Miltionone I | GRIK2     | 80.882 |
| DS | Miltionone I | TNFRSF11A | 55.444 |
| DS | Miltionone I | SCN1B     | 55.444 |
| DS | Miltionone I | GRIK3     | 23     |
| DS | Miltionone I | RELA      | 22.373 |
| DS | Miltionone I | PAX3      | 22.373 |
| DS | Miltionone I | SEMA4D    | 22.373 |
| DS | Miltionone I | SCN3B     | 22.373 |
| DS | Miltionone I | ARPN      | 22.373 |
| DS | Miltionone I | NKX3-1    | 22.373 |
| DS | Miltionone I | ANK2      | 22.373 |
| DS | Miltionone I | FZD2      | 22.373 |
| DS | Miltionone I | NCKAP1L   | 22.373 |
| DS | Miltionone I | TH        | 22.373 |
| DS | Miltionone I | MAP2K5    | 22.373 |
| DS | Miltionone I | PTGIS     | 22.373 |
| DS | Miltionone I | SERPINB3  | 22.373 |
| DS | Miltionone I | PRSS12    | 22.373 |
| DS | Miltionone I | FADD      | 22.373 |
| DS | Miltionone I | HEG1      | 22.373 |
| DS | Miltionone I | WNT2      | 22.373 |
| DS | Miltionone I | C5        | 22.373 |
| DS | Miltionone I | FCER2     | 22.373 |
| DS | Miltionone I | CDK5R1    | 22.373 |
| DS | Miltionone I | GPR68     | 22.373 |



|    |                   |          |        |
|----|-------------------|----------|--------|
| DS | Miltionone I      | ROCK2    | 22.373 |
| DS | Miltionone I      | ANK3     | 22.373 |
| DS | Miltionone I      | UROD     | 22.373 |
| DS | Miltionone I      | FGFR4    | 22.373 |
| DS | Miltionone I      | WNT11    | 22.373 |
| DS | Miltionone I      | ATP6AP1  | 22.373 |
| DS | Miltionone I      | CDH8     | 22.373 |
| DS | Miltionone I      | ROCK1    | 22.373 |
| DS | Miltionone I      | KCNA5    | 22.373 |
| DS | Miltionone I      | TNFAIP3  | 22.373 |
| DS | Miltionone I      | NOD2     | 22.373 |
| DS | Miltionone I      | APOA1    | 22.373 |
| DS | Miltionone I      | LTF      | 22.373 |
| DS | Miltionone I      | CTNNB1   | 22.373 |
| DS | Miltionone I      | FGFR3    | 22.373 |
| DS | Miltionone I      | PARK2    | 22.373 |
| DS | Miltionone I      | FGFRL1   | 22.373 |
| DS | Miltionone I      | GRIK1    | 22.373 |
| DS | Miltionone I      | UGT1A1   | 22.373 |
| DS | Miltionone I      | FOS      | 22.373 |
| DS | Lithospermic Acid | IMPDH1   | 23     |
| DS | Lithospermic Acid | IMPDH2   | 23     |
| DS | Neotanshinone C   | TNFSF11  | 80.882 |
| DS | Neotanshinone C   | GABRB1   | 80.882 |
| DS | Neotanshinone C   | GRIN2A   | 80.882 |
| DS | Neotanshinone C   | GABRG1   | 80.882 |
| DS | Neotanshinone C   | GABRA4   | 80.882 |
| DS | Neotanshinone C   | PTGS1    | 80.882 |
| DS | Neotanshinone C   | GABRA5   | 80.882 |
| DS | Neotanshinone C   | CHRFAM7A | 80.882 |
| DS | Neotanshinone C   | GRIN1    | 80.882 |
| DS | Neotanshinone C   | TP63     | 55.444 |
| DS | Neotanshinone C   | LTA      | 55.444 |
| DS | Neotanshinone C   | DCT      | 22.373 |
| DS | Neotanshinone C   | HMGA2    | 22.373 |
| DS | Neotanshinone C   | NAMPT    | 22.373 |
| DS | Neotanshinone C   | CSF1     | 22.373 |
| DS | Neotanshinone C   | FNDC5    | 22.373 |
| DS | Neotanshinone C   | MIF      | 22.373 |
| DS | Neotanshinone C   | SNAI1    | 22.373 |
| DS | Neotanshinone C   | LGALS3   | 22.373 |
| DS | Neotanshinone C   | METRNL   | 22.373 |
| DS | Neotanshinone C   | FGF7     | 22.373 |
| DS | Neotanshinone C   | SOX17    | 22.373 |
| DS | Neotanshinone C   | KCNA1    | 22.373 |
| DS | Neotanshinone C   | SHH      | 22.373 |
| DS | Neotanshinone C   | SPARC    | 22.373 |
| DS | Neotanshinone C   | S1PR2    | 22.373 |
| DS | Neotanshinone C   | PGR      | 22.373 |
| DS | Neotanshinone C   | ASXL2    | 22.373 |
| DS | Neotanshinone C   | WNT4     | 22.373 |

|    |                 |         |        |
|----|-----------------|---------|--------|
| DS | Neotanshinone C | DRD2    | 22.373 |
| DS | Neotanshinone C | LEP     | 22.373 |
| DS | Neotanshinone C | IFNG    | 22.373 |
| DS | Neotanshinone C | STAP1   | 22.373 |
| DS | Neotanshinone C | ADIRF   | 22.373 |
| DS | Neotanshinone C | KCNE5   | 22.373 |
| DS | Neotanshinone C | INS     | 22.373 |
| DS | Neotanshinone C | BGLAP   | 22.373 |
| DS | Neotanshinone C | CYP4B1  | 22.373 |
| DS | Neotanshinone C | ALOX15B | 22.373 |
| DS | Neotanshinone C | CDC20   | 22.373 |
| DS | Neotanshinone C | PNPT1   | 22.373 |
| DS | Neotanshinone C | GRIK5   | 22.373 |
| DS | Neotanshinone C | HPN     | 22.373 |
| DS | Neotanshinone C | FZD1    | 22.373 |
| DS | Neotanshinone C | CDC42   | 22.373 |
| DS | Neotanshinone C | IDO1    | 22.373 |
| DS | Neotanshinone C | FGA     | 22.373 |
| DS | Neotanshinone C | KDM6B   | 22.373 |
| DS | Neotanshinone C | ALOX15  | 22.373 |
| DS | Neotanshinone C | KCNQ1   | 22.373 |
| DS | Neotanshinone C | SOX9    | 22.373 |
| DS | Neotanshinone C | FAS     | 22.373 |
| DS | Neotanshinone C | PRDM16  | 22.373 |
| DS | Neotanshinone C | NFKB1   | 80.882 |
| DS | Neotanshinone C | GABRG3  | 80.882 |
| DS | Neotanshinone C | CYP11A1 | 80.882 |
| DS | Neotanshinone C | FGFR2   | 80.882 |
| DS | Neotanshinone C | GABRB2  | 80.882 |
| DS | Neotanshinone C | ORM1    | 80.882 |
| DS | Neotanshinone C | GABRA6  | 80.882 |
| DS | Neotanshinone C | CRBN    | 80.882 |
| DS | Neotanshinone C | FGF10   | 55.444 |
| DS | Neotanshinone C | ADRA1B  | 55.444 |
| DS | Neotanshinone C | CHRNA9  | 55.444 |
| DS | Neotanshinone C | FBP1    | 22.373 |
| DS | Neotanshinone C | CDK5R2  | 22.373 |
| DS | Neotanshinone C | APOA2   | 22.373 |
| DS | Neotanshinone C | CAPN5   | 22.373 |
| DS | Neotanshinone C | NAV2    | 22.373 |
| DS | Neotanshinone C | SNAI2   | 22.373 |
| DS | Neotanshinone C | CYP1A2  | 22.373 |
| DS | Neotanshinone C | KLF4    | 22.373 |
| DS | Neotanshinone C | MAPK9   | 22.373 |
| DS | Neotanshinone C | BMP15   | 22.373 |
| DS | Neotanshinone C | BCL11A  | 22.373 |
| DS | Neotanshinone C | EIF2AK1 | 22.373 |
| DS | Neotanshinone C | SOSTDC1 | 22.373 |
| DS | Neotanshinone C | FOXP3   | 22.373 |
| DS | Neotanshinone C | GFI1    | 22.373 |
| DS | Neotanshinone C | ANGPT1  | 22.373 |

|    |                 |         |        |
|----|-----------------|---------|--------|
| DS | Neotanshinone C | PEX14   | 22.373 |
| DS | Neotanshinone C | IL1RN   | 22.373 |
| DS | Neotanshinone C | HAS2    | 22.373 |
| DS | Neotanshinone C | SRC     | 22.373 |
| DS | Neotanshinone C | CHRNA2  | 22.373 |
| DS | Neotanshinone C | SLC6A4  | 22.373 |
| DS | Neotanshinone C | BDKRB2  | 22.373 |
| DS | Neotanshinone C | COLQ    | 22.373 |
| DS | Neotanshinone C | ACE     | 22.373 |
| DS | Neotanshinone C | DRD4    | 22.373 |
| DS | Neotanshinone C | STAR    | 22.373 |
| DS | Neotanshinone C | CAV3    | 22.373 |
| DS | Neotanshinone C | NCOA1   | 22.373 |
| DS | Neotanshinone C | UGT3A2  | 22.373 |
| DS | Neotanshinone C | GRIK4   | 22.373 |
| DS | Neotanshinone C | KMT2A   | 22.373 |
| DS | Neotanshinone C | BMP4    | 22.373 |
| DS | Neotanshinone C | IL4     | 22.373 |
| DS | Neotanshinone C | MECOM   | 22.373 |
| DS | Neotanshinone C | SNCA    | 22.373 |
| DS | Neotanshinone C | RYR2    | 22.373 |
| DS | Neotanshinone C | SRSF6   | 22.373 |
| DS | Neotanshinone C | CASQ2   | 22.373 |
| DS | Neotanshinone C | OCSTAMP | 22.373 |
| DS | Neotanshinone C | KISS1   | 22.373 |
| DS | Neotanshinone C | CYP27B1 | 22.373 |
| DS | Neotanshinone C | GABRA2  | 80.882 |
| DS | Neotanshinone C | GRIN3B  | 80.882 |
| DS | Neotanshinone C | SCN5A   | 80.882 |
| DS | Neotanshinone C | GABRP   | 80.882 |
| DS | Neotanshinone C | GRIN2C  | 80.882 |
| DS | Neotanshinone C | PTGS2   | 80.882 |
| DS | Neotanshinone C | GABRA1  | 80.882 |
| DS | Neotanshinone C | CYP19A1 | 80.882 |
| DS | Neotanshinone C | LEF1    | 55.444 |
| DS | Neotanshinone C | FGFR1   | 55.444 |
| DS | Neotanshinone C | RXRA    | 55.444 |
| DS | Neotanshinone C | SCN2B   | 22.373 |
| DS | Neotanshinone C | NDRG2   | 22.373 |
| DS | Neotanshinone C | DIXDC1  | 22.373 |
| DS | Neotanshinone C | AKR1C3  | 22.373 |
| DS | Neotanshinone C | NFIB    | 22.373 |
| DS | Neotanshinone C | AVPR1A  | 22.373 |
| DS | Neotanshinone C | FASLG   | 22.373 |
| DS | Neotanshinone C | WHSC1   | 22.373 |
| DS | Neotanshinone C | ID2     | 22.373 |
| DS | Neotanshinone C | TLR3    | 22.373 |
| DS | Neotanshinone C | NPR3    | 22.373 |
| DS | Neotanshinone C | IL1B    | 22.373 |
| DS | Neotanshinone C | SCN10A  | 22.373 |
| DS | Neotanshinone C | CAT     | 22.373 |

|    |                 |          |        |
|----|-----------------|----------|--------|
| DS | Neotanshinone C | ADORA2B  | 22.373 |
| DS | Neotanshinone C | GREM1    | 22.373 |
| DS | Neotanshinone C | TBR1     | 22.373 |
| DS | Neotanshinone C | ADRA1D   | 22.373 |
| DS | Neotanshinone C | DNM3     | 22.373 |
| DS | Neotanshinone C | WNT2B    | 22.373 |
| DS | Neotanshinone C | EGF      | 22.373 |
| DS | Neotanshinone C | TGFB2    | 22.373 |
| DS | Neotanshinone C | NEUROD2  | 22.373 |
| DS | Neotanshinone C | MMP28    | 22.373 |
| DS | Neotanshinone C | PHF14    | 22.373 |
| DS | Neotanshinone C | GLI3     | 22.373 |
| DS | Neotanshinone C | ATP13A2  | 22.373 |
| DS | Neotanshinone C | IL10     | 22.373 |
| DS | Neotanshinone C | RYR3     | 22.373 |
| DS | Neotanshinone C | POU3F3   | 22.373 |
| DS | Neotanshinone C | BCL2L1   | 22.373 |
| DS | Neotanshinone C | GRIA3    | 22.373 |
| DS | Neotanshinone C | AHCY     | 22.373 |
| DS | Neotanshinone C | NAPRT    | 22.373 |
| DS | Neotanshinone C | POU3F2   | 22.373 |
| DS | Neotanshinone C | DRD1     | 22.373 |
| DS | Neotanshinone C | CPLX2    | 22.373 |
| DS | Neotanshinone C | ANXA1    | 22.373 |
| DS | Neotanshinone C | GJA5     | 22.373 |
| DS | Neotanshinone C | PEX5     | 22.373 |
| DS | Neotanshinone C | GRM7     | 22.373 |
| DS | Neotanshinone C | HSD17B3  | 22.373 |
| DS | Neotanshinone C | GABRD    | 80.882 |
| DS | Neotanshinone C | TNF      | 80.882 |
| DS | Neotanshinone C | GABRE    | 80.882 |
| DS | Neotanshinone C | GRIA2    | 80.882 |
| DS | Neotanshinone C | GRIN2B   | 80.882 |
| DS | Neotanshinone C | GABRB3   | 80.882 |
| DS | Neotanshinone C | GABRG2   | 80.882 |
| DS | Neotanshinone C | ORM2     | 80.882 |
| DS | Neotanshinone C | APLN     | 55.444 |
| DS | Neotanshinone C | EPHX2    | 55.444 |
| DS | Neotanshinone C | SERPINB7 | 55.444 |
| DS | Neotanshinone C | RELA     | 22.373 |
| DS | Neotanshinone C | GRIA4    | 22.373 |
| DS | Neotanshinone C | RGCC     | 22.373 |
| DS | Neotanshinone C | CD74     | 22.373 |
| DS | Neotanshinone C | HPX      | 22.373 |
| DS | Neotanshinone C | GRIA1    | 22.373 |
| DS | Neotanshinone C | CCL5     | 22.373 |
| DS | Neotanshinone C | CLDN5    | 22.373 |
| DS | Neotanshinone C | LILRB1   | 22.373 |
| DS | Neotanshinone C | ESR1     | 22.373 |
| DS | Neotanshinone C | MEF2C    | 22.373 |
| DS | Neotanshinone C | DICER1   | 22.373 |

|    |                 |           |        |
|----|-----------------|-----------|--------|
| DS | Neotanshinone C | RIPK1     | 22.373 |
| DS | Neotanshinone C | CLU       | 22.373 |
| DS | Neotanshinone C | NPY5R     | 22.373 |
| DS | Neotanshinone C | HRAS      | 22.373 |
| DS | Neotanshinone C | HTR2C     | 22.373 |
| DS | Neotanshinone C | VANGL2    | 22.373 |
| DS | Neotanshinone C | PROC      | 22.373 |
| DS | Neotanshinone C | AVP       | 22.373 |
| DS | Neotanshinone C | CACNA1D   | 22.373 |
| DS | Neotanshinone C | TIRAP     | 22.373 |
| DS | Neotanshinone C | ACHE      | 22.373 |
| DS | Neotanshinone C | SMAD7     | 22.373 |
| DS | Neotanshinone C | SCN4B     | 22.373 |
| DS | Neotanshinone C | ANAPC2    | 22.373 |
| DS | Neotanshinone C | HSD17B1   | 22.373 |
| DS | Neotanshinone C | ADCY3     | 22.373 |
| DS | Neotanshinone C | IL6       | 22.373 |
| DS | Neotanshinone C | LRRK2     | 22.373 |
| DS | Neotanshinone C | NPPA      | 22.373 |
| DS | Neotanshinone C | FOXL2     | 22.373 |
| DS | Neotanshinone C | SRD5A2    | 22.373 |
| DS | Neotanshinone C | IKBKB     | 22.373 |
| DS | Neotanshinone C | AGER      | 22.373 |
| DS | Neotanshinone C | CX3CR1    | 22.373 |
| DS | Neotanshinone C | CD34      | 22.373 |
| DS | Neotanshinone C | CALCA     | 22.373 |
| DS | Neotanshinone C | PTHLH     | 22.373 |
| DS | Neotanshinone C | PDGFB     | 22.373 |
| DS | Neotanshinone C | CYP1A1    | 22.373 |
| DS | Neotanshinone C | CCM2L     | 22.373 |
| DS | Neotanshinone C | CHRNA4    | 80.882 |
| DS | Neotanshinone C | CHRNA7    | 80.882 |
| DS | Neotanshinone C | GABRA3    | 80.882 |
| DS | Neotanshinone C | CDH5      | 80.882 |
| DS | Neotanshinone C | GABRQ     | 80.882 |
| DS | Neotanshinone C | GRIN3A    | 80.882 |
| DS | Neotanshinone C | GRIN2D    | 80.882 |
| DS | Neotanshinone C | GRIK2     | 80.882 |
| DS | Neotanshinone C | TNFRSF11A | 55.444 |
| DS | Neotanshinone C | SCN1B     | 55.444 |
| DS | Neotanshinone C | GRIK3     | 23     |
| DS | Neotanshinone C | GPD1L     | 22.373 |
| DS | Neotanshinone C | PAX3      | 22.373 |
| DS | Neotanshinone C | SEMA4D    | 22.373 |
| DS | Neotanshinone C | SCN3B     | 22.373 |
| DS | Neotanshinone C | ARPIN     | 22.373 |
| DS | Neotanshinone C | NKX3-1    | 22.373 |
| DS | Neotanshinone C | ANK2      | 22.373 |
| DS | Neotanshinone C | FZD2      | 22.373 |
| DS | Neotanshinone C | NCKAP1L   | 22.373 |
| DS | Neotanshinone C | TH        | 22.373 |

|    |                 |          |        |
|----|-----------------|----------|--------|
| DS | Neotanshinone C | MAP2K5   | 22.373 |
| DS | Neotanshinone C | PTGIS    | 22.373 |
| DS | Neotanshinone C | SERPINB3 | 22.373 |
| DS | Neotanshinone C | PRSS12   | 22.373 |
| DS | Neotanshinone C | FADD     | 22.373 |
| DS | Neotanshinone C | HEG1     | 22.373 |
| DS | Neotanshinone C | WNT2     | 22.373 |
| DS | Neotanshinone C | C5       | 22.373 |
| DS | Neotanshinone C | FCER2    | 22.373 |
| DS | Neotanshinone C | CDK5R1   | 22.373 |
| DS | Neotanshinone C | GPR68    | 22.373 |
| DS | Neotanshinone C | ROCK2    | 22.373 |
| DS | Neotanshinone C | ANK3     | 22.373 |
| DS | Neotanshinone C | UROD     | 22.373 |
| DS | Neotanshinone C | FGFR4    | 22.373 |
| DS | Neotanshinone C | WNT11    | 22.373 |
| DS | Neotanshinone C | ATP6AP1  | 22.373 |
| DS | Neotanshinone C | CDH8     | 22.373 |
| DS | Neotanshinone C | ROCK1    | 22.373 |
| DS | Neotanshinone C | KCNA5    | 22.373 |
| DS | Neotanshinone C | TNFAIP3  | 22.373 |
| DS | Neotanshinone C | NOD2     | 22.373 |
| DS | Neotanshinone C | APOA1    | 22.373 |
| DS | Neotanshinone C | LTF      | 22.373 |
| DS | Neotanshinone C | CTNNB1   | 22.373 |
| DS | Neotanshinone C | FGFR3    | 22.373 |
| DS | Neotanshinone C | PARK2    | 22.373 |
| DS | Neotanshinone C | FGFRL1   | 22.373 |
| DS | Neotanshinone C | GRIK1    | 22.373 |
| DS | Neotanshinone C | UGT1A1   | 22.373 |
| DS | Neotanshinone C | FOS      | 22.373 |
| DS | Salvinone       | ESR1     | 80.882 |
| DS | Salvinone       | TFAP2C   | 22.373 |
| DS | Salvinone       | SHH      | 22.373 |
| DS | Salvinone       | AREG     | 22.373 |
| DS | Salvinone       | TRIM24   | 22.373 |
| DS | Salvinone       | ESR2     | 48     |
| DS | Salvinone       | TOX3     | 22.373 |
| DS | Salvinone       | LEF1     | 22.373 |
| DS | Salvinone       | GPER1    | 22.373 |
| DS | Salvinone       | NR1I2    | 48     |
| DS | Salvinone       | TGFB1    | 22.373 |
| DS | Salvinone       | FGFR2    | 22.373 |
| DS | Salvinone       | WNT5A    | 22.373 |
| DS | Salvinone       | ALOX5    | 48     |
| DS | Salvinone       | MED1     | 22.373 |
| DS | Salvinone       | PGR      | 22.373 |
| DS | Salvinone       | SOX9     | 22.373 |
| DS | Salvinone       | HSD17B1  | 23     |
| DS | Salvinone       | NKX3-1   | 22.373 |
| DS | Salvinone       | WNT4     | 22.373 |

|    |               |         |         |
|----|---------------|---------|---------|
| DS | Salvinone     | VDR     | 22.373  |
| DS | Cryptoxanthin | VDR     | 122.778 |
| DS | Cryptoxanthin | RXRΒ    | 48      |
| DS | Cryptoxanthin | RDH5    | 48      |
| DS | Cryptoxanthin | PGR     | 48      |
| DS | Cryptoxanthin | DHRS4   | 48      |
| DS | Cryptoxanthin | RARA    | 48      |
| DS | Cryptoxanthin | ALDH1A2 | 48      |
| DS | Cryptoxanthin | SNAI2   | 22.373  |
| DS | Cryptoxanthin | FGF23   | 22.373  |
| DS | Cryptoxanthin | BAX     | 22.373  |
| DS | Cryptoxanthin | S100G   | 22.373  |
| DS | Cryptoxanthin | CYP27B1 | 80.882  |
| DS | Cryptoxanthin | RBP3    | 48      |
| DS | Cryptoxanthin | RARRES1 | 48      |
| DS | Cryptoxanthin | RARB    | 48      |
| DS | Cryptoxanthin | RBP1    | 48      |
| DS | Cryptoxanthin | RDH8    | 48      |
| DS | Cryptoxanthin | NFKB1   | 22.373  |
| DS | Cryptoxanthin | MED1    | 22.373  |
| DS | Cryptoxanthin | GFI1    | 22.373  |
| DS | Cryptoxanthin | KL      | 22.373  |
| DS | Cryptoxanthin | CYP27A1 | 22.373  |
| DS | Cryptoxanthin | CYP27A1 | 22.373  |
| DS | Cryptoxanthin | GC      | 55.444  |
| DS | Cryptoxanthin | RETSAT  | 48      |
| DS | Cryptoxanthin | NR0B1   | 48      |
| DS | Cryptoxanthin | ALDH1A3 | 48      |
| DS | Cryptoxanthin | ALDH1A1 | 48      |
| DS | Cryptoxanthin | GPRC5A  | 48      |
| DS | Cryptoxanthin | AKR1C3  | 22.373  |
| DS | Cryptoxanthin | SNAI1   | 22.373  |
| DS | Cryptoxanthin | LANCL2  | 22.373  |
| DS | Cryptoxanthin | CYP2R1  | 22.373  |
| DS | Cryptoxanthin | KANK2   | 22.373  |
| DS | Cryptoxanthin | SNW1    | 55.444  |
| DS | Cryptoxanthin | RDH13   | 48      |
| DS | Cryptoxanthin | ESR1    | 48      |
| DS | Cryptoxanthin | RXRG    | 48      |
| DS | Cryptoxanthin | RLBP1   | 48      |
| DS | Cryptoxanthin | LRAT    | 48      |
| DS | Cryptoxanthin | CYP24A1 | 22.373  |
| DS | Cryptoxanthin | CYP3A4  | 22.373  |
| DS | Cryptoxanthin | WNT4    | 22.373  |
| DS | Cryptoxanthin | PML     | 22.373  |
| DS | Cryptoxanthin | IRX5    | 22.373  |
| DS | Cryptoxanthin | RDH11   | 48      |
| DS | Cryptoxanthin | DHRS3   | 48      |
| DS | Cryptoxanthin | RARG    | 48      |
| DS | Cryptoxanthin | RDH12   | 48      |
| DS | Cryptoxanthin | RDH14   | 48      |

|    |                  |          |        |
|----|------------------|----------|--------|
| DS | Cryptoxanthin    | RXRA     | 48     |
| DS | Cryptoxanthin    | GPBAR1   | 22.373 |
| DS | Cryptoxanthin    | CALB1    | 22.373 |
| DS | Cryptoxanthin    | TCF3     | 22.373 |
| DS | Cryptoxanthin    | B4GALT1  | 22.373 |
| DS | Cryptoxanthin    | NR1H4    | 22.373 |
| DS | Danshenxinkun A  | CHRM3    | 23     |
| DS | Danshenxinkun A  | CHRM1    | 23     |
| DS | Danshenxinkun A  | CHRM2    | 23     |
| DS | Danshenxinkun A  | CHRM4    | 23     |
| DS | Dehydromiltirone | HTR4     | 80.882 |
| DS | Dehydromiltirone | NQO2     | 80.882 |
| DS | Dehydromiltirone | GGCX     | 80.882 |
| DS | Dehydromiltirone | OPRM1    | 80.882 |
| DS | Dehydromiltirone | HTR1A    | 80.882 |
| DS | Dehydromiltirone | AGTR1    | 80.882 |
| DS | Dehydromiltirone | AVP      | 55.444 |
| DS | Dehydromiltirone | WLS      | 55.444 |
| DS | Dehydromiltirone | PCK1     | 22.373 |
| DS | Dehydromiltirone | CSF1     | 22.373 |
| DS | Dehydromiltirone | FNDC5    | 22.373 |
| DS | Dehydromiltirone | CA7      | 22.373 |
| DS | Dehydromiltirone | SLC38A3  | 22.373 |
| DS | Dehydromiltirone | RXFP4    | 22.373 |
| DS | Dehydromiltirone | MAPK9    | 22.373 |
| DS | Dehydromiltirone | MC4R     | 22.373 |
| DS | Dehydromiltirone | MTNR1B   | 22.373 |
| DS | Dehydromiltirone | MAS1     | 22.373 |
| DS | Dehydromiltirone | S1PR2    | 22.373 |
| DS | Dehydromiltirone | HEG1     | 22.373 |
| DS | Dehydromiltirone | CDH5     | 22.373 |
| DS | Dehydromiltirone | KCNK4    | 22.373 |
| DS | Dehydromiltirone | SLC6A4   | 22.373 |
| DS | Dehydromiltirone | HTR3D    | 22.373 |
| DS | Dehydromiltirone | ANAPC2   | 22.373 |
| DS | Dehydromiltirone | BICD1    | 22.373 |
| DS | Dehydromiltirone | RET      | 22.373 |
| DS | Dehydromiltirone | SOD2     | 22.373 |
| DS | Dehydromiltirone | STATH    | 22.373 |
| DS | Dehydromiltirone | TMBIM6   | 22.373 |
| DS | Dehydromiltirone | SNCA     | 22.373 |
| DS | Dehydromiltirone | ADORA1   | 22.373 |
| DS | Dehydromiltirone | EGFR     | 22.373 |
| DS | Dehydromiltirone | CCM2L    | 22.373 |
| DS | Dehydromiltirone | GABRA2   | 80.882 |
| DS | Dehydromiltirone | HTR1B    | 80.882 |
| DS | Dehydromiltirone | F10      | 80.882 |
| DS | Dehydromiltirone | AGTR2    | 80.882 |
| DS | Dehydromiltirone | PTGS2    | 80.882 |
| DS | Dehydromiltirone | VKORC1L1 | 80.882 |
| DS | Dehydromiltirone | PAX2     | 55.444 |



|    |                  |          |        |
|----|------------------|----------|--------|
| DS | Dehydromiltirone | GPR27    | 55.444 |
| DS | Dehydromiltirone | ADCY6    | 22.373 |
| DS | Dehydromiltirone | IL34     | 22.373 |
| DS | Dehydromiltirone | ACIN1    | 22.373 |
| DS | Dehydromiltirone | ADRB2    | 22.373 |
| DS | Dehydromiltirone | CCL5     | 22.373 |
| DS | Dehydromiltirone | METRNL   | 22.373 |
| DS | Dehydromiltirone | LILRB1   | 22.373 |
| DS | Dehydromiltirone | CYP4F2   | 22.373 |
| DS | Dehydromiltirone | PPP1R1B  | 22.373 |
| DS | Dehydromiltirone | BMP6     | 22.373 |
| DS | Dehydromiltirone | EGR1     | 22.373 |
| DS | Dehydromiltirone | AGTRAP   | 22.373 |
| DS | Dehydromiltirone | TFPI     | 22.373 |
| DS | Dehydromiltirone | SOD1     | 22.373 |
| DS | Dehydromiltirone | ARRB1    | 22.373 |
| DS | Dehydromiltirone | NEUROD2  | 22.373 |
| DS | Dehydromiltirone | WNT11    | 22.373 |
| DS | Dehydromiltirone | ACSL4    | 22.373 |
| DS | Dehydromiltirone | LRRK2    | 22.373 |
| DS | Dehydromiltirone | MC5R     | 22.373 |
| DS | Dehydromiltirone | HTR3E    | 22.373 |
| DS | Dehydromiltirone | NAPRT    | 22.373 |
| DS | Dehydromiltirone | NCK1     | 22.373 |
| DS | Dehydromiltirone | ALOX15   | 22.373 |
| DS | Dehydromiltirone | CBR1     | 22.373 |
| DS | Dehydromiltirone | PROS1    | 80.882 |
| DS | Dehydromiltirone | GABRA3   | 80.882 |
| DS | Dehydromiltirone | VKORC1   | 80.882 |
| DS | Dehydromiltirone | BGLAP    | 80.882 |
| DS | Dehydromiltirone | HTR3A    | 80.882 |
| DS | Dehydromiltirone | F2       | 80.882 |
| DS | Dehydromiltirone | DAB2     | 55.444 |
| DS | Dehydromiltirone | SERPINB7 | 55.444 |
| DS | Dehydromiltirone | NAMPT    | 22.373 |
| DS | Dehydromiltirone | C1QTNF1  | 22.373 |
| DS | Dehydromiltirone | ANG      | 22.373 |
| DS | Dehydromiltirone | WT1      | 22.373 |
| DS | Dehydromiltirone | PLA2R1   | 22.373 |
| DS | Dehydromiltirone | PPP1R9B  | 22.373 |
| DS | Dehydromiltirone | PKD2     | 22.373 |
| DS | Dehydromiltirone | CRHBP    | 22.373 |
| DS | Dehydromiltirone | HTN1     | 22.373 |
| DS | Dehydromiltirone | MAOB     | 22.373 |
| DS | Dehydromiltirone | SERPINF2 | 22.373 |
| DS | Dehydromiltirone | BCL2     | 22.373 |
| DS | Dehydromiltirone | OXTR     | 22.373 |
| DS | Dehydromiltirone | CCS      | 22.373 |
| DS | Dehydromiltirone | AIF1     | 22.373 |
| DS | Dehydromiltirone | NMUR2    | 22.373 |
| DS | Dehydromiltirone | RPS6KA2  | 22.373 |

|    |                  |          |        |
|----|------------------|----------|--------|
| DS | Dehydromiltirone | CDC20    | 22.373 |
| DS | Dehydromiltirone | SOD3     | 22.373 |
| DS | Dehydromiltirone | MC3R     | 22.373 |
| DS | Dehydromiltirone | DRD5     | 22.373 |
| DS | Dehydromiltirone | MECOM    | 22.373 |
| DS | Dehydromiltirone | ADIPOQ   | 22.373 |
| DS | Dehydromiltirone | ANXA1    | 22.373 |
| DS | Dehydromiltirone | HTR3C    | 22.373 |
| DS | Dehydromiltirone | PROZ     | 80.882 |
| DS | Dehydromiltirone | F7       | 80.882 |
| DS | Dehydromiltirone | JUN      | 80.882 |
| DS | Dehydromiltirone | PTGS1    | 80.882 |
| DS | Dehydromiltirone | GABRA1   | 80.882 |
| DS | Dehydromiltirone | AGT      | 55.444 |
| DS | Dehydromiltirone | MGP      | 55.444 |
| DS | Dehydromiltirone | ACTN2    | 55.444 |
| DS | Dehydromiltirone | RGCC     | 22.373 |
| DS | Dehydromiltirone | MC2R     | 22.373 |
| DS | Dehydromiltirone | CD36     | 22.373 |
| DS | Dehydromiltirone | HNF1B    | 22.373 |
| DS | Dehydromiltirone | CLDN5    | 22.373 |
| DS | Dehydromiltirone | HTR2B    | 22.373 |
| DS | Dehydromiltirone | AQP2     | 22.373 |
| DS | Dehydromiltirone | CYP11A1  | 22.373 |
| DS | Dehydromiltirone | ACE2     | 22.373 |
| DS | Dehydromiltirone | SIPA1    | 22.373 |
| DS | Dehydromiltirone | SPRY1    | 22.373 |
| DS | Dehydromiltirone | GAS6     | 22.373 |
| DS | Dehydromiltirone | PPP1R15A | 22.373 |
| DS | Dehydromiltirone | UTS2R    | 22.373 |
| DS | Dehydromiltirone | BDKRB2   | 22.373 |
| DS | Dehydromiltirone | INS      | 22.373 |
| DS | Dehydromiltirone | CD47     | 22.373 |
| DS | Dehydromiltirone | SPX      | 22.373 |
| DS | Dehydromiltirone | THRB     | 22.373 |
| DS | Dehydromiltirone | HTR3B    | 22.373 |
| DS | Dehydromiltirone | RFK      | 22.373 |
| DS | Dehydromiltirone | AGER     | 22.373 |
| DS | Dehydromiltirone | CPLX2    | 22.373 |
| DS | Dehydromiltirone | UBIAD1   | 22.373 |
| DS | Dehydromiltirone | GLRA1    | 22.373 |
| DS | Dehydromiltirone | AVPRIA   | 80.882 |
| DS | Dehydromiltirone | F9       | 80.882 |
| DS | Dehydromiltirone | PROC     | 80.882 |
| DS | Dehydromiltirone | AVPR2    | 80.882 |
| DS | Dehydromiltirone | NQO1     | 80.882 |
| DS | Dehydromiltirone | CBR4     | 55.444 |
| DS | Dehydromiltirone | F3       | 55.444 |
| DS | Dehydromiltirone | NDRG2    | 22.373 |
| DS | Dehydromiltirone | HACD1    | 22.373 |
| DS | Dehydromiltirone | UTS2     | 22.373 |

|    |                  |          |         |
|----|------------------|----------|---------|
| DS | Dehydromiltirone | SDC4     | 22.373  |
| DS | Dehydromiltirone | OXT      | 22.373  |
| DS | Dehydromiltirone | DCSTAMP  | 22.373  |
| DS | Dehydromiltirone | COMT     | 22.373  |
| DS | Dehydromiltirone | MC1R     | 22.373  |
| DS | Dehydromiltirone | PTGIS    | 22.373  |
| DS | Dehydromiltirone | CYP4F11  | 22.373  |
| DS | Dehydromiltirone | AMELX    | 22.373  |
| DS | Dehydromiltirone | HRH3     | 22.373  |
| DS | Dehydromiltirone | CTNNBIP1 | 22.373  |
| DS | Dehydromiltirone | PLA2G1B  | 22.373  |
| DS | Dehydromiltirone | ACVR2A   | 22.373  |
| DS | Dehydromiltirone | HCRT     | 22.373  |
| DS | Dehydromiltirone | ACE      | 22.373  |
| DS | Dehydromiltirone | ALOX15B  | 22.373  |
| DS | Dehydromiltirone | UGT3A2   | 22.373  |
| DS | Dehydromiltirone | REN      | 22.373  |
| DS | Dehydromiltirone | SPRY2    | 22.373  |
| DS | Dehydromiltirone | NCK2     | 22.373  |
| DS | Dehydromiltirone | FGA      | 22.373  |
| DS | Dehydromiltirone | CA2      | 22.373  |
| DS | Dehydromiltirone | AVPR1B   | 22.373  |
| DS | Dehydromiltirone | PRDM16   | 22.373  |
| DS | Ferruginol       | ESR2     | 122.778 |
| DS | Ferruginol       | PDE3A    | 80.882  |
| DS | Ferruginol       | SCN2A    | 80.882  |
| DS | Ferruginol       | GABRB2   | 80.882  |
| DS | Ferruginol       | GABRA5   | 80.882  |
| DS | Ferruginol       | GABRG2   | 80.882  |
| DS | Ferruginol       | RXRA     | 55.444  |
| DS | Ferruginol       | SCN3A    | 23      |
| DS | Ferruginol       | SEMA4D   | 22.373  |
| DS | Ferruginol       | MIF      | 22.373  |
| DS | Ferruginol       | FASLG    | 22.373  |
| DS | Ferruginol       | CRP      | 22.373  |
| DS | Ferruginol       | IL1B     | 22.373  |
| DS | Ferruginol       | SLC44A4  | 22.373  |
| DS | Ferruginol       | ANGPT1   | 22.373  |
| DS | Ferruginol       | PLN      | 22.373  |
| DS | Ferruginol       | HRC      | 22.373  |
| DS | Ferruginol       | ROCK2    | 22.373  |
| DS | Ferruginol       | CAMK2D   | 22.373  |
| DS | Ferruginol       | ROCK1    | 22.373  |
| DS | Ferruginol       | BMP4     | 22.373  |
| DS | Ferruginol       | AGRN     | 22.373  |
| DS | Ferruginol       | PDE2A    | 22.373  |
| DS | Ferruginol       | GRIN1    | 22.373  |
| DS | Ferruginol       | ESR1     | 122.778 |
| DS | Ferruginol       | GABRB1   | 80.882  |
| DS | Ferruginol       | GABRA3   | 80.882  |
| DS | Ferruginol       | ACHE     | 80.882  |

|    |            |         |         |
|----|------------|---------|---------|
| DS | Ferruginol | GABRA6  | 80.882  |
| DS | Ferruginol | PDE3B   | 55.444  |
| DS | Ferruginol | OPRK1   | 48      |
| DS | Ferruginol | HMGA2   | 22.373  |
| DS | Ferruginol | NRG1    | 22.373  |
| DS | Ferruginol | DMGDH   | 22.373  |
| DS | Ferruginol | LGALS3  | 22.373  |
| DS | Ferruginol | TLR3    | 22.373  |
| DS | Ferruginol | SHH     | 22.373  |
| DS | Ferruginol | ADORA2B | 22.373  |
| DS | Ferruginol | AURKA   | 22.373  |
| DS | Ferruginol | DNM3    | 22.373  |
| DS | Ferruginol | SLC6A4  | 22.373  |
| DS | Ferruginol | ADIRF   | 22.373  |
| DS | Ferruginol | IL10    | 22.373  |
| DS | Ferruginol | FNTA    | 22.373  |
| DS | Ferruginol | AHCY    | 22.373  |
| DS | Ferruginol | IKBKB   | 22.373  |
| DS | Ferruginol | CHDH    | 22.373  |
| DS | Ferruginol | HCN2    | 22.373  |
| DS | Ferruginol | NR1I2   | 122.778 |
| DS | Ferruginol | GABRG3  | 80.882  |
| DS | Ferruginol | GABRG1  | 80.882  |
| DS | Ferruginol | SCN4A   | 80.882  |
| DS | Ferruginol | GABRA1  | 80.882  |
| DS | Ferruginol | PDE4D   | 55.444  |
| DS | Ferruginol | OPRM1   | 48      |
| DS | Ferruginol | PDE5A   | 22.373  |
| DS | Ferruginol | CD74    | 22.373  |
| DS | Ferruginol | NKX3-1  | 22.373  |
| DS | Ferruginol | KLF4    | 22.373  |
| DS | Ferruginol | EPO     | 22.373  |
| DS | Ferruginol | RIPK1   | 22.373  |
| DS | Ferruginol | ALDH7A1 | 22.373  |
| DS | Ferruginol | WNT2    | 22.373  |
| DS | Ferruginol | FCER2   | 22.373  |
| DS | Ferruginol | TGFB2   | 22.373  |
| DS | Ferruginol | BDKRB2  | 22.373  |
| DS | Ferruginol | CDH8    | 22.373  |
| DS | Ferruginol | HPN     | 22.373  |
| DS | Ferruginol | APOA1   | 22.373  |
| DS | Ferruginol | IDO1    | 22.373  |
| DS | Ferruginol | SOX9    | 22.373  |
| DS | Ferruginol | GABRA2  | 80.882  |
| DS | Ferruginol | TNF     | 80.882  |
| DS | Ferruginol | GABRP   | 80.882  |
| DS | Ferruginol | GABRQ   | 80.882  |
| DS | Ferruginol | PDE4B   | 80.882  |
| DS | Ferruginol | COLQ    | 55.444  |
| DS | Ferruginol | ALOX5   | 48      |
| DS | Ferruginol | APOA2   | 22.373  |

|    |                     |         |        |
|----|---------------------|---------|--------|
| DS | Ferruginol          | HPX     | 22.373 |
| DS | Ferruginol          | SIX3    | 22.373 |
| DS | Ferruginol          | LILRB1  | 22.373 |
| DS | Ferruginol          | MAP2K5  | 22.373 |
| DS | Ferruginol          | FGF10   | 22.373 |
| DS | Ferruginol          | FADD    | 22.373 |
| DS | Ferruginol          | YBX3    | 22.373 |
| DS | Ferruginol          | WNT2B   | 22.373 |
| DS | Ferruginol          | RAPGEF2 | 22.373 |
| DS | Ferruginol          | ASCL1   | 22.373 |
| DS | Ferruginol          | NCOA1   | 22.373 |
| DS | Ferruginol          | KMT2A   | 22.373 |
| DS | Ferruginol          | ARHGEF2 | 22.373 |
| DS | Ferruginol          | CTNNB1  | 22.373 |
| DS | Ferruginol          | CAMK2G  | 22.373 |
| DS | Ferruginol          | GABRD   | 80.882 |
| DS | Ferruginol          | GABRE   | 80.882 |
| DS | Ferruginol          | GABRA4  | 80.882 |
| DS | Ferruginol          | GABRB3  | 80.882 |
| DS | Ferruginol          | BCHE    | 80.882 |
| DS | Ferruginol          | LTA     | 55.444 |
| DS | Ferruginol          | SCN1A   | 23     |
| DS | Ferruginol          | SLC5A7  | 22.373 |
| DS | Ferruginol          | SIRT2   | 22.373 |
| DS | Ferruginol          | HCN4    | 22.373 |
| DS | Ferruginol          | NCKAP1L | 22.373 |
| DS | Ferruginol          | EIF2AK1 | 22.373 |
| DS | Ferruginol          | PRSS12  | 22.373 |
| DS | Ferruginol          | FGFR2   | 22.373 |
| DS | Ferruginol          | IL1RN   | 22.373 |
| DS | Ferruginol          | IFNG    | 22.373 |
| DS | Ferruginol          | TIRAP   | 22.373 |
| DS | Ferruginol          | ENPP6   | 22.373 |
| DS | Ferruginol          | IL6     | 22.373 |
| DS | Ferruginol          | NOD2    | 22.373 |
| DS | Ferruginol          | IL4     | 22.373 |
| DS | Ferruginol          | CHKA    | 22.373 |
| DS | Ferruginol          | FAS     | 22.373 |
| DS | Neocryptotanshinone | CHRM3   | 23     |
| DS | Neocryptotanshinone | CHRM1   | 23     |
| DS | Neocryptotanshinone | CHRM2   | 23     |
| DS | Neocryptotanshinone | CHRM4   | 23     |
| DS | Danshensu           | ADRA1A  | 48     |
| DS | Danshensu           | TAT     | 48     |
| DS | Danshensu           | DRD4    | 48     |
| DS | Danshensu           | YARS    | 48     |
| DS | Danshensu           | ADRA2B  | 48     |
| DS | Danshensu           | ADRB2   | 48     |
| DS | Danshensu           | ADRA1D  | 48     |
| DS | Danshensu           | ADRA1B  | 48     |
| DS | Danshensu           | DRD5    | 48     |

|    |                        |          |        |
|----|------------------------|----------|--------|
| DS | Danshensu              | ADRA2A   | 48     |
| DS | Danshensu              | DRD2     | 48     |
| DS | Danshensu              | ADRA2C   | 48     |
| DS | Danshensu              | DRD1     | 48     |
| DS | Danshensu              | TH       | 48     |
| DS | Danshensu              | PAH      | 48     |
| DS | Danshensu              | DRD3     | 48     |
| DS | Danshensu              | YARS2    | 48     |
| DS | Danshensu              | ADRB1    | 48     |
| DS | Danshensu              | DDC      | 48     |
| DS | Danshensu              | ALOX5    | 48     |
| DS | Danshensu              | ADRB3    | 48     |
| DS | Isocryptotanshinone    | DHODH    | 48     |
| DS | Caffeicacid            | AR       | 26.373 |
| DS | Caffeicacid            | IFNG     | 23     |
| DS | Caffeicacid            | TPMT     | 23     |
| DS | Neocryptotanshinone li | TNFSF11  | 80.882 |
| DS | Neocryptotanshinone li | GABRB1   | 80.882 |
| DS | Neocryptotanshinone li | GRIN2A   | 80.882 |
| DS | Neocryptotanshinone li | GABRG1   | 80.882 |
| DS | Neocryptotanshinone li | GABRA4   | 80.882 |
| DS | Neocryptotanshinone li | PTGS1    | 80.882 |
| DS | Neocryptotanshinone li | GABRA5   | 80.882 |
| DS | Neocryptotanshinone li | CHRFAM7A | 80.882 |
| DS | Neocryptotanshinone li | GRIN1    | 80.882 |
| DS | Neocryptotanshinone li | TP63     | 55.444 |
| DS | Neocryptotanshinone li | LTA      | 55.444 |
| DS | Neocryptotanshinone li | DCT      | 22.373 |
| DS | Neocryptotanshinone li | HMGA2    | 22.373 |
| DS | Neocryptotanshinone li | NAMPT    | 22.373 |
| DS | Neocryptotanshinone li | CSF1     | 22.373 |
| DS | Neocryptotanshinone li | FNDC5    | 22.373 |
| DS | Neocryptotanshinone li | MIF      | 22.373 |
| DS | Neocryptotanshinone li | SNAI1    | 22.373 |
| DS | Neocryptotanshinone li | LGALS3   | 22.373 |
| DS | Neocryptotanshinone li | METRNL   | 22.373 |
| DS | Neocryptotanshinone li | FGF7     | 22.373 |
| DS | Neocryptotanshinone li | SOX17    | 22.373 |
| DS | Neocryptotanshinone li | KCNA1    | 22.373 |
| DS | Neocryptotanshinone li | SHH      | 22.373 |
| DS | Neocryptotanshinone li | SPARC    | 22.373 |
| DS | Neocryptotanshinone li | S1PR2    | 22.373 |
| DS | Neocryptotanshinone li | PGR      | 22.373 |
| DS | Neocryptotanshinone li | ASXL2    | 22.373 |
| DS | Neocryptotanshinone li | WNT4     | 22.373 |
| DS | Neocryptotanshinone li | DRD2     | 22.373 |
| DS | Neocryptotanshinone li | LEP      | 22.373 |
| DS | Neocryptotanshinone li | IFNG     | 22.373 |
| DS | Neocryptotanshinone li | STAP1    | 22.373 |
| DS | Neocryptotanshinone li | ADIRF    | 22.373 |
| DS | Neocryptotanshinone li | KCNE5    | 22.373 |

|    |                        |         |        |
|----|------------------------|---------|--------|
| DS | Neocryptotanshinone li | INS     | 22.373 |
| DS | Neocryptotanshinone li | BGLAP   | 22.373 |
| DS | Neocryptotanshinone li | CYP4B1  | 22.373 |
| DS | Neocryptotanshinone li | ALOX15B | 22.373 |
| DS | Neocryptotanshinone li | CDC20   | 22.373 |
| DS | Neocryptotanshinone li | PNPT1   | 22.373 |
| DS | Neocryptotanshinone li | GRIK5   | 22.373 |
| DS | Neocryptotanshinone li | HPN     | 22.373 |
| DS | Neocryptotanshinone li | FZD1    | 22.373 |
| DS | Neocryptotanshinone li | CDC42   | 22.373 |
| DS | Neocryptotanshinone li | IDO1    | 22.373 |
| DS | Neocryptotanshinone li | FGA     | 22.373 |
| DS | Neocryptotanshinone li | KDM6B   | 22.373 |
| DS | Neocryptotanshinone li | ALOX15  | 22.373 |
| DS | Neocryptotanshinone li | KCNQ1   | 22.373 |
| DS | Neocryptotanshinone li | SOX9    | 22.373 |
| DS | Neocryptotanshinone li | FAS     | 22.373 |
| DS | Neocryptotanshinone li | PRDM16  | 22.373 |
| DS | Neocryptotanshinone li | NFKB1   | 80.882 |
| DS | Neocryptotanshinone li | GABRG3  | 80.882 |
| DS | Neocryptotanshinone li | CYP11A1 | 80.882 |
| DS | Neocryptotanshinone li | FGFR2   | 80.882 |
| DS | Neocryptotanshinone li | GABRB2  | 80.882 |
| DS | Neocryptotanshinone li | ORM1    | 80.882 |
| DS | Neocryptotanshinone li | GABRA6  | 80.882 |
| DS | Neocryptotanshinone li | CRBN    | 80.882 |
| DS | Neocryptotanshinone li | FGF10   | 55.444 |
| DS | Neocryptotanshinone li | ADRA1B  | 55.444 |
| DS | Neocryptotanshinone li | CHRNA9  | 55.444 |
| DS | Neocryptotanshinone li | FBP1    | 22.373 |
| DS | Neocryptotanshinone li | CDK5R2  | 22.373 |
| DS | Neocryptotanshinone li | APOA2   | 22.373 |
| DS | Neocryptotanshinone li | CAPN5   | 22.373 |
| DS | Neocryptotanshinone li | NAV2    | 22.373 |
| DS | Neocryptotanshinone li | SNAI2   | 22.373 |
| DS | Neocryptotanshinone li | CYP1A2  | 22.373 |
| DS | Neocryptotanshinone li | KLF4    | 22.373 |
| DS | Neocryptotanshinone li | MAPK9   | 22.373 |
| DS | Neocryptotanshinone li | BMP15   | 22.373 |
| DS | Neocryptotanshinone li | BCL11A  | 22.373 |
| DS | Neocryptotanshinone li | EIF2AK1 | 22.373 |
| DS | Neocryptotanshinone li | SOSTDC1 | 22.373 |
| DS | Neocryptotanshinone li | FOXP3   | 22.373 |
| DS | Neocryptotanshinone li | GFI1    | 22.373 |
| DS | Neocryptotanshinone li | ANGPT1  | 22.373 |
| DS | Neocryptotanshinone li | PEX14   | 22.373 |
| DS | Neocryptotanshinone li | IL1RN   | 22.373 |
| DS | Neocryptotanshinone li | HAS2    | 22.373 |
| DS | Neocryptotanshinone li | SRC     | 22.373 |
| DS | Neocryptotanshinone li | CHRN2   | 22.373 |
| DS | Neocryptotanshinone li | SLC6A4  | 22.373 |

|    |                        |         |        |
|----|------------------------|---------|--------|
| DS | Neocryptotanshinone li | BDKRB2  | 22.373 |
| DS | Neocryptotanshinone li | COLQ    | 22.373 |
| DS | Neocryptotanshinone li | ACE     | 22.373 |
| DS | Neocryptotanshinone li | DRD4    | 22.373 |
| DS | Neocryptotanshinone li | STAR    | 22.373 |
| DS | Neocryptotanshinone li | CAV3    | 22.373 |
| DS | Neocryptotanshinone li | NCOA1   | 22.373 |
| DS | Neocryptotanshinone li | UGT3A2  | 22.373 |
| DS | Neocryptotanshinone li | GRIK4   | 22.373 |
| DS | Neocryptotanshinone li | KMT2A   | 22.373 |
| DS | Neocryptotanshinone li | BMP4    | 22.373 |
| DS | Neocryptotanshinone li | IL4     | 22.373 |
| DS | Neocryptotanshinone li | MECOM   | 22.373 |
| DS | Neocryptotanshinone li | SNCA    | 22.373 |
| DS | Neocryptotanshinone li | RYR2    | 22.373 |
| DS | Neocryptotanshinone li | SRSF6   | 22.373 |
| DS | Neocryptotanshinone li | CASQ2   | 22.373 |
| DS | Neocryptotanshinone li | OCSTAMP | 22.373 |
| DS | Neocryptotanshinone li | KISS1   | 22.373 |
| DS | Neocryptotanshinone li | CYP27B1 | 22.373 |
| DS | Neocryptotanshinone li | GABRA2  | 80.882 |
| DS | Neocryptotanshinone li | GRIN3B  | 80.882 |
| DS | Neocryptotanshinone li | SCN5A   | 80.882 |
| DS | Neocryptotanshinone li | GABRP   | 80.882 |
| DS | Neocryptotanshinone li | GRIN2C  | 80.882 |
| DS | Neocryptotanshinone li | PTGS2   | 80.882 |
| DS | Neocryptotanshinone li | GABRA1  | 80.882 |
| DS | Neocryptotanshinone li | CYP19A1 | 80.882 |
| DS | Neocryptotanshinone li | LEF1    | 55.444 |
| DS | Neocryptotanshinone li | FGFR1   | 55.444 |
| DS | Neocryptotanshinone li | RXRA    | 55.444 |
| DS | Neocryptotanshinone li | SCN2B   | 22.373 |
| DS | Neocryptotanshinone li | NDRG2   | 22.373 |
| DS | Neocryptotanshinone li | DIXDC1  | 22.373 |
| DS | Neocryptotanshinone li | AKR1C3  | 22.373 |
| DS | Neocryptotanshinone li | NFIB    | 22.373 |
| DS | Neocryptotanshinone li | AVPR1A  | 22.373 |
| DS | Neocryptotanshinone li | FASLG   | 22.373 |
| DS | Neocryptotanshinone li | WHSC1   | 22.373 |
| DS | Neocryptotanshinone li | ID2     | 22.373 |
| DS | Neocryptotanshinone li | TLR3    | 22.373 |
| DS | Neocryptotanshinone li | NPR3    | 22.373 |
| DS | Neocryptotanshinone li | IL1B    | 22.373 |
| DS | Neocryptotanshinone li | SCN10A  | 22.373 |
| DS | Neocryptotanshinone li | CAT     | 22.373 |
| DS | Neocryptotanshinone li | ADORA2B | 22.373 |
| DS | Neocryptotanshinone li | GREM1   | 22.373 |
| DS | Neocryptotanshinone li | TBR1    | 22.373 |
| DS | Neocryptotanshinone li | ADRA1D  | 22.373 |
| DS | Neocryptotanshinone li | DNM3    | 22.373 |
| DS | Neocryptotanshinone li | WNT2B   | 22.373 |



|    |                        |          |        |
|----|------------------------|----------|--------|
| DS | Neocryptotanshinone li | EGF      | 22.373 |
| DS | Neocryptotanshinone li | TGFB2    | 22.373 |
| DS | Neocryptotanshinone li | NEUROD2  | 22.373 |
| DS | Neocryptotanshinone li | MMP28    | 22.373 |
| DS | Neocryptotanshinone li | PHF14    | 22.373 |
| DS | Neocryptotanshinone li | GLI3     | 22.373 |
| DS | Neocryptotanshinone li | ATP13A2  | 22.373 |
| DS | Neocryptotanshinone li | IL10     | 22.373 |
| DS | Neocryptotanshinone li | RYR3     | 22.373 |
| DS | Neocryptotanshinone li | POU3F3   | 22.373 |
| DS | Neocryptotanshinone li | BCL2L1   | 22.373 |
| DS | Neocryptotanshinone li | GRIA3    | 22.373 |
| DS | Neocryptotanshinone li | AHCY     | 22.373 |
| DS | Neocryptotanshinone li | NAPRT    | 22.373 |
| DS | Neocryptotanshinone li | POU3F2   | 22.373 |
| DS | Neocryptotanshinone li | DRD1     | 22.373 |
| DS | Neocryptotanshinone li | CPLX2    | 22.373 |
| DS | Neocryptotanshinone li | ANXA1    | 22.373 |
| DS | Neocryptotanshinone li | GJA5     | 22.373 |
| DS | Neocryptotanshinone li | PEX5     | 22.373 |
| DS | Neocryptotanshinone li | GRM7     | 22.373 |
| DS | Neocryptotanshinone li | HSD17B3  | 22.373 |
| DS | Neocryptotanshinone li | GABRD    | 80.882 |
| DS | Neocryptotanshinone li | TNF      | 80.882 |
| DS | Neocryptotanshinone li | GABRE    | 80.882 |
| DS | Neocryptotanshinone li | GRIA2    | 80.882 |
| DS | Neocryptotanshinone li | GRIN2B   | 80.882 |
| DS | Neocryptotanshinone li | GABRB3   | 80.882 |
| DS | Neocryptotanshinone li | GABRG2   | 80.882 |
| DS | Neocryptotanshinone li | ORM2     | 80.882 |
| DS | Neocryptotanshinone li | APLN     | 55.444 |
| DS | Neocryptotanshinone li | EPHX2    | 55.444 |
| DS | Neocryptotanshinone li | SERPINB7 | 55.444 |
| DS | Neocryptotanshinone li | RELA     | 22.373 |
| DS | Neocryptotanshinone li | GRIA4    | 22.373 |
| DS | Neocryptotanshinone li | RGCC     | 22.373 |
| DS | Neocryptotanshinone li | CD74     | 22.373 |
| DS | Neocryptotanshinone li | HPX      | 22.373 |
| DS | Neocryptotanshinone li | GRIA1    | 22.373 |
| DS | Neocryptotanshinone li | CCL5     | 22.373 |
| DS | Neocryptotanshinone li | CLDN5    | 22.373 |
| DS | Neocryptotanshinone li | LILRB1   | 22.373 |
| DS | Neocryptotanshinone li | ESR1     | 22.373 |
| DS | Neocryptotanshinone li | MEF2C    | 22.373 |
| DS | Neocryptotanshinone li | DICER1   | 22.373 |
| DS | Neocryptotanshinone li | RIPK1    | 22.373 |
| DS | Neocryptotanshinone li | CLU      | 22.373 |
| DS | Neocryptotanshinone li | NPY5R    | 22.373 |
| DS | Neocryptotanshinone li | HRAS     | 22.373 |
| DS | Neocryptotanshinone li | HTR2C    | 22.373 |
| DS | Neocryptotanshinone li | VANGL2   | 22.373 |

|    |                        |           |        |
|----|------------------------|-----------|--------|
| DS | Neocryptotanshinone li | PROC      | 22.373 |
| DS | Neocryptotanshinone li | AVP       | 22.373 |
| DS | Neocryptotanshinone li | CACNA1D   | 22.373 |
| DS | Neocryptotanshinone li | TIRAP     | 22.373 |
| DS | Neocryptotanshinone li | ACHE      | 22.373 |
| DS | Neocryptotanshinone li | SMAD7     | 22.373 |
| DS | Neocryptotanshinone li | SCN4B     | 22.373 |
| DS | Neocryptotanshinone li | ANAPC2    | 22.373 |
| DS | Neocryptotanshinone li | HSD17B1   | 22.373 |
| DS | Neocryptotanshinone li | ADCY3     | 22.373 |
| DS | Neocryptotanshinone li | IL6       | 22.373 |
| DS | Neocryptotanshinone li | LRRK2     | 22.373 |
| DS | Neocryptotanshinone li | NPPA      | 22.373 |
| DS | Neocryptotanshinone li | FOXL2     | 22.373 |
| DS | Neocryptotanshinone li | SRD5A2    | 22.373 |
| DS | Neocryptotanshinone li | IKBKB     | 22.373 |
| DS | Neocryptotanshinone li | AGER      | 22.373 |
| DS | Neocryptotanshinone li | CX3CR1    | 22.373 |
| DS | Neocryptotanshinone li | CD34      | 22.373 |
| DS | Neocryptotanshinone li | CALCA     | 22.373 |
| DS | Neocryptotanshinone li | PTHLH     | 22.373 |
| DS | Neocryptotanshinone li | PDGFB     | 22.373 |
| DS | Neocryptotanshinone li | CYP1A1    | 22.373 |
| DS | Neocryptotanshinone li | CCM2L     | 22.373 |
| DS | Neocryptotanshinone li | CHRNA4    | 80.882 |
| DS | Neocryptotanshinone li | CHRNA7    | 80.882 |
| DS | Neocryptotanshinone li | GABRA3    | 80.882 |
| DS | Neocryptotanshinone li | CDH5      | 80.882 |
| DS | Neocryptotanshinone li | GABRQ     | 80.882 |
| DS | Neocryptotanshinone li | GRIN3A    | 80.882 |
| DS | Neocryptotanshinone li | GRIN2D    | 80.882 |
| DS | Neocryptotanshinone li | GRIK2     | 80.882 |
| DS | Neocryptotanshinone li | TNFRSF11A | 55.444 |
| DS | Neocryptotanshinone li | SCN1B     | 55.444 |
| DS | Neocryptotanshinone li | GRIK3     | 23     |
| DS | Neocryptotanshinone li | GPD1L     | 22.373 |
| DS | Neocryptotanshinone li | PAX3      | 22.373 |
| DS | Neocryptotanshinone li | SEMA4D    | 22.373 |
| DS | Neocryptotanshinone li | SCN3B     | 22.373 |
| DS | Neocryptotanshinone li | ARPIN     | 22.373 |
| DS | Neocryptotanshinone li | NKX3-1    | 22.373 |
| DS | Neocryptotanshinone li | ANK2      | 22.373 |
| DS | Neocryptotanshinone li | FZD2      | 22.373 |
| DS | Neocryptotanshinone li | NCKAP1L   | 22.373 |
| DS | Neocryptotanshinone li | TH        | 22.373 |
| DS | Neocryptotanshinone li | MAP2K5    | 22.373 |
| DS | Neocryptotanshinone li | PTGIS     | 22.373 |
| DS | Neocryptotanshinone li | SERPINB3  | 22.373 |
| DS | Neocryptotanshinone li | PRSS12    | 22.373 |
| DS | Neocryptotanshinone li | FADD      | 22.373 |
| DS | Neocryptotanshinone li | HEG1      | 22.373 |

|    |                        |          |        |
|----|------------------------|----------|--------|
| DS | Neocryptotanshinone li | WNT2     | 22.373 |
| DS | Neocryptotanshinone li | C5       | 22.373 |
| DS | Neocryptotanshinone li | FCER2    | 22.373 |
| DS | Neocryptotanshinone li | CDK5R1   | 22.373 |
| DS | Neocryptotanshinone li | GPR68    | 22.373 |
| DS | Neocryptotanshinone li | ROCK2    | 22.373 |
| DS | Neocryptotanshinone li | ANK3     | 22.373 |
| DS | Neocryptotanshinone li | UROD     | 22.373 |
| DS | Neocryptotanshinone li | FGFR4    | 22.373 |
| DS | Neocryptotanshinone li | WNT11    | 22.373 |
| DS | Neocryptotanshinone li | ATP6AP1  | 22.373 |
| DS | Neocryptotanshinone li | CDH8     | 22.373 |
| DS | Neocryptotanshinone li | ROCK1    | 22.373 |
| DS | Neocryptotanshinone li | KCNA5    | 22.373 |
| DS | Neocryptotanshinone li | TNFAIP3  | 22.373 |
| DS | Neocryptotanshinone li | NOD2     | 22.373 |
| DS | Neocryptotanshinone li | APOA1    | 22.373 |
| DS | Neocryptotanshinone li | LTF      | 22.373 |
| DS | Neocryptotanshinone li | CTNNB1   | 22.373 |
| DS | Neocryptotanshinone li | FGFR3    | 22.373 |
| DS | Neocryptotanshinone li | PARK2    | 22.373 |
| DS | Neocryptotanshinone li | FGFRL1   | 22.373 |
| DS | Neocryptotanshinone li | GRIK1    | 22.373 |
| DS | Neocryptotanshinone li | UGT1A1   | 22.373 |
| DS | Neocryptotanshinone li | FOS      | 22.373 |
| DS | Heteratisine           | CHRM3    | 48     |
| DS | Heteratisine           | ABCB1    | 23     |
| DS | Heteratisine           | CYP3A4   | 48     |
| DS | Heteratisine           | CHRM1    | 48     |
| DS | Heteratisine           | PADI4    | 48     |
| DS | Heteratisine           | CHRM2    | 48     |
| DS | Isotenuilin            | PGR      | 80.882 |
| DS | Isotenuilin            | NR3C1    | 48     |
| DS | Isotenuilin            | NOX1     | 22.373 |
| DS | Isotenuilin            | NEDD4    | 22.373 |
| DS | Isotenuilin            | SRC      | 22.373 |
| DS | Isotenuilin            | IL10     | 22.373 |
| DS | Isotenuilin            | TSPO     | 22.373 |
| DS | Isotenuilin            | VDR      | 22.373 |
| DS | Isotenuilin            | AR       | 80.882 |
| DS | Isotenuilin            | CACNA1I  | 23     |
| DS | Isotenuilin            | PHB      | 22.373 |
| DS | Isotenuilin            | SHBG     | 22.373 |
| DS | Isotenuilin            | STAP1    | 22.373 |
| DS | Isotenuilin            | NR1I3    | 22.373 |
| DS | Isotenuilin            | CX3CR1   | 22.373 |
| DS | Isotenuilin            | CYP19A1  | 80.882 |
| DS | Isotenuilin            | CACNA1G  | 23     |
| DS | Isotenuilin            | MED1     | 22.373 |
| DS | Isotenuilin            | SERPINB3 | 22.373 |
| DS | Isotenuilin            | TGFB2    | 22.373 |

|    |                        |         |         |
|----|------------------------|---------|---------|
| DS | Isotenulin             | TNFAIP3 | 22.373  |
| DS | Isotenulin             | CD34    | 22.373  |
| DS | Isotenulin             | NR3C2   | 80.882  |
| DS | Isotenulin             | TNFSF11 | 22.373  |
| DS | Isotenulin             | NKX3-1  | 22.373  |
| DS | Isotenulin             | FOXP3   | 22.373  |
| DS | Isotenulin             | MMP28   | 22.373  |
| DS | Isotenulin             | ALDH1A1 | 22.373  |
| DS | Isotenulin             | S100A9  | 22.373  |
| DS | Isotenulin             | WNT4    | 55.444  |
| DS | Isotenulin             | COL5A1  | 22.373  |
| DS | Isotenulin             | ESR1    | 22.373  |
| DS | Isotenulin             | C5      | 22.373  |
| DS | Isotenulin             | UBR5    | 22.373  |
| DS | Isotenulin             | IL4     | 22.373  |
| DS | Isotenulin             | PDGFB   | 22.373  |
| DS | Dihydroisotanshinone I | DHODH   | 48      |
| DS | Tanshinone Vi          | SCN5A   | 80.882  |
| DS | Tanshinone Vi          | TACR1   | 48      |
| DS | Tanshinone Vi          | SCN3B   | 22.373  |
| DS | Tanshinone Vi          | SMAD7   | 22.373  |
| DS | Tanshinone Vi          | RYR2    | 22.373  |
| DS | Tanshinone Vi          | SCN1B   | 55.444  |
| DS | Tanshinone Vi          | REN     | 48      |
| DS | Tanshinone Vi          | ANK2    | 22.373  |
| DS | Tanshinone Vi          | SCN4B   | 22.373  |
| DS | Tanshinone Vi          | KCNQ1   | 22.373  |
| DS | Tanshinone Vi          | LHCGR   | 48      |
| DS | Tanshinone Vi          | GNRHR   | 48      |
| DS | Tanshinone Vi          | SCN10A  | 22.373  |
| DS | Tanshinone Vi          | CAV3    | 22.373  |
| DS | Tanshinone Vi          | CASQ2   | 22.373  |
| DS | Tanshinone Vi          | SSTR5   | 48      |
| DS | Tanshinone Vi          | SCN2B   | 22.373  |
| DS | Tanshinone Vi          | CACNA1D | 22.373  |
| DS | Tanshinone Vi          | KCNA5   | 22.373  |
| DS | Tanshinone Vi          | GJA5    | 22.373  |
| DS | Tanshinone Vi          | SSTR2   | 48      |
| DS | Tanshinone Vi          | GPD1L   | 22.373  |
| DS | Tanshinone Vi          | KCNE5   | 22.373  |
| DS | Tanshinone Vi          | NPPA    | 22.373  |
| DS | Salvianolicacid B      | IMPDH1  | 23      |
| DS | Salvianolicacid B      | IMPDH2  | 23      |
| DS | Daphneolone            | ESR1    | 48      |
| DS | Daphneolone            | ALOX5   | 48      |
| DS | Tanshinone Ii A        | CHRNA10 | 80.882  |
| DS | Dehydrotremetone       | PDE5A   | 23      |
| DS | Dehydrotremetone       | PDE11A  | 23      |
| DS | Gamma-Sitosterol       | ESR1    | 122.778 |
| DS | Gamma-Sitosterol       | SNW1    | 55.444  |
| DS | Gamma-Sitosterol       | CYP24A1 | 22.373  |

|    |                  |         |         |
|----|------------------|---------|---------|
| DS | Gamma-Sitosterol | CYP3A4  | 22.373  |
| DS | Gamma-Sitosterol | WNT4    | 22.373  |
| DS | Gamma-Sitosterol | PML     | 22.373  |
| DS | Gamma-Sitosterol | IRX5    | 22.373  |
| DS | Gamma-Sitosterol | PGR     | 122.778 |
| DS | Gamma-Sitosterol | AR      | 48      |
| DS | Gamma-Sitosterol | GPBAR1  | 22.373  |
| DS | Gamma-Sitosterol | CALB1   | 22.373  |
| DS | Gamma-Sitosterol | TCF3    | 22.373  |
| DS | Gamma-Sitosterol | B4GALT1 | 22.373  |
| DS | Gamma-Sitosterol | RXRA    | 22.373  |
| DS | Gamma-Sitosterol | VDR     | 80.882  |
| DS | Gamma-Sitosterol | NR3C1   | 48      |
| DS | Gamma-Sitosterol | SNAI2   | 22.373  |
| DS | Gamma-Sitosterol | FGF23   | 22.373  |
| DS | Gamma-Sitosterol | BAX     | 22.373  |
| DS | Gamma-Sitosterol | S100G   | 22.373  |
| DS | Gamma-Sitosterol | NR1H4   | 22.373  |
| DS | Gamma-Sitosterol | CYP27B1 | 80.882  |
| DS | Gamma-Sitosterol | NFKB1   | 22.373  |
| DS | Gamma-Sitosterol | MED1    | 22.373  |
| DS | Gamma-Sitosterol | GFI1    | 22.373  |
| DS | Gamma-Sitosterol | KL      | 22.373  |
| DS | Gamma-Sitosterol | CYP27A1 | 22.373  |
| DS | Gamma-Sitosterol | TRIM24  | 22.373  |
| DS | Gamma-Sitosterol | GC      | 55.444  |
| DS | Gamma-Sitosterol | AKR1C3  | 22.373  |
| DS | Gamma-Sitosterol | SNAI1   | 22.373  |
| DS | Gamma-Sitosterol | LANCL2  | 22.373  |
| DS | Gamma-Sitosterol | CYP2R1  | 22.373  |
| DS | Gamma-Sitosterol | KANK2   | 22.373  |
| DS | Lithospermate B  | IMPDH1  | 23      |
| DS | Lithospermate B  | IMPDH2  | 23      |
| DS | Dauricine        | ACHE    | 122.778 |
| DS | Dauricine        | CHRM3   | 48      |
| DS | Dauricine        | HTR1D   | 48      |
| DS | Dauricine        | ADRA2C  | 48      |
| DS | Dauricine        | BCHE    | 48      |
| DS | Dauricine        | CHRNA2  | 122.778 |
| DS | Dauricine        | HTR2B   | 48      |
| DS | Dauricine        | DRD2    | 48      |
| DS | Dauricine        | CALY    | 48      |
| DS | Dauricine        | ADRA2B  | 48      |
| DS | Dauricine        | HTR3A   | 122.778 |
| DS | Dauricine        | ADRA2A  | 48      |
| DS | Dauricine        | SLC18A2 | 48      |
| DS | Dauricine        | DRD3    | 48      |
| DS | Dauricine        | CHRM2   | 122.778 |
| DS | Dauricine        | HTR1B   | 48      |
| DS | Dauricine        | DRD4    | 48      |
| DS | Dauricine        | DRD5    | 48      |

|    |                       |         |        |
|----|-----------------------|---------|--------|
| DS | Dauricine             | HTR2A   | 48     |
| DS | Dauricine             | HTR2C   | 48     |
| DS | Dauricine             | HTR1A   | 48     |
| DS | Dauricine             | DRD1    | 48     |
| DS | Rosmarinine           | FKBP1A  | 48     |
| DS | Rosmarinine           | MTOR    | 48     |
| DS | 6-Hydroxymethylumazin | PDXK    | 80.882 |
| DS | 6-Hydroxymethylumazin | GPI     | 22.373 |
| DS | 6-Hydroxymethylumazin | PNPO    | 55.444 |
| DS | 6-Hydroxymethylumazin | PSAT1   | 22.373 |
| DS | 6-Hydroxymethylumazin | IMPA1   | 55.444 |
| DS | 6-Hydroxymethylumazin | AOX1    | 22.373 |
| DS | 6-Hydroxymethylumazin | PDXP    | 22.373 |
| DS | 6-Hydroxymethylumazin | TKT     | 22.373 |
| DS | 6-Hydroxymethylumazin | TPI1    | 22.373 |
| DS | 6-Hydroxymethylumazin | KDM3A   | 22.373 |
| DS | Tanshinone Iib        | CHRM3   | 23     |
| DS | Tanshinone Iib        | CHRM1   | 23     |
| DS | Tanshinone Iib        | CHRM2   | 23     |
| DS | Tanshinone Iib        | CHRM4   | 23     |
| DS | Samaderin A           | FKBP1A  | 80.882 |
| DS | Samaderin A           | FGF18   | 22.373 |
| DS | Samaderin A           | RPTOR   | 22.373 |
| DS | Samaderin A           | MTOR    | 80.882 |
| DS | Samaderin A           | FGF16   | 22.373 |
| DS | Samaderin A           | SLC2A2  | 22.373 |
| DS | Samaderin A           | FGF2    | 80.882 |
| DS | Samaderin A           | GFI1    | 22.373 |
| DS | Samaderin A           | CMYA5   | 22.373 |
| DS | Samaderin A           | NR3C2   | 48     |
| DS | Samaderin A           | WNT3A   | 22.373 |
| DS | Samaderin A           | FKBP1B  | 23     |
| DS | Samaderin A           | MAF1    | 22.373 |
| DS | 1-Hydroxytaxinine A   | PTGER4  | 80.882 |
| DS | 1-Hydroxytaxinine A   | PRKCA   | 48     |
| DS | 1-Hydroxytaxinine A   | DAPK2   | 22.373 |
| DS | 1-Hydroxytaxinine A   | CCL24   | 22.373 |
| DS | 1-Hydroxytaxinine A   | PTGER2  | 80.882 |
| DS | 1-Hydroxytaxinine A   | HMGCR   | 48     |
| DS | 1-Hydroxytaxinine A   | NOTCH2  | 22.373 |
| DS | 1-Hydroxytaxinine A   | IL4     | 22.373 |
| DS | 1-Hydroxytaxinine A   | PTGER3  | 80.882 |
| DS | 1-Hydroxytaxinine A   | PRKCD   | 48     |
| DS | 1-Hydroxytaxinine A   | HPGD    | 22.373 |
| DS | 1-Hydroxytaxinine A   | CD300A  | 55.444 |
| DS | 1-Hydroxytaxinine A   | NR3C2   | 48     |
| DS | 1-Hydroxytaxinine A   | PTGER1  | 22.373 |
| DS | 1-Hydroxytaxinine A   | KIF14   | 55.444 |
| DS | 1-Hydroxytaxinine A   | NR3C1   | 23     |
| DS | 1-Hydroxytaxinine A   | ADAM8   | 22.373 |
| DS | Isotanshinone Ii      | CHRNA10 | 80.882 |

|    |                 |         |         |
|----|-----------------|---------|---------|
| DS | Ursolicacid     | SRD5A1  | 48      |
| DS | Ursolicacid     | ESR1    | 48      |
| DS | Ursolicacid     | AR      | 48      |
| DS | Ursolicacid     | PTGER2  | 48      |
| DS | Ursolicacid     | ANXA1   | 48      |
| DS | Ursolicacid     | COX7C   | 23      |
| DS | Ursolicacid     | COX3    | 23      |
| DS | Ursolicacid     | AKR1C1  | 23      |
| DS | Ursolicacid     | FABP6   | 23      |
| DS | Ursolicacid     | NR1H4   | 23      |
| DS | Ursolicacid     | CYP17A1 | 48      |
| DS | Ursolicacid     | TRPV1   | 48      |
| DS | Ursolicacid     | NR3C1   | 48      |
| DS | Ursolicacid     | PTGS1   | 48      |
| DS | Ursolicacid     | NR3C2   | 48      |
| DS | Ursolicacid     | COX1    | 23      |
| DS | Ursolicacid     | COX7A1  | 23      |
| DS | Ursolicacid     | COX6A2  | 23      |
| DS | Ursolicacid     | CES1    | 23      |
| DS | Ursolicacid     | SLC8A1  | 48      |
| DS | Ursolicacid     | PTGER1  | 48      |
| DS | Ursolicacid     | OPRK1   | 48      |
| DS | Ursolicacid     | PTGER3  | 48      |
| DS | Ursolicacid     | ESRRG   | 23      |
| DS | Ursolicacid     | AKR1C2  | 23      |
| DS | Ursolicacid     | FECH    | 23      |
| DS | Ursolicacid     | HMGCR   | 23      |
| DS | Ursolicacid     | COX7B   | 23      |
| DS | Ursolicacid     | F12     | 48      |
| DS | Ursolicacid     | PTGER4  | 48      |
| DS | Ursolicacid     | FADS2   | 48      |
| DS | Ursolicacid     | PTGS2   | 48      |
| DS | Ursolicacid     | COX6C   | 23      |
| DS | Ursolicacid     | ADH1B   | 23      |
| DS | Ursolicacid     | COX4I1  | 23      |
| DS | Ursolicacid     | ADH1C   | 23      |
| DS | Ursolicacid     | COX2    | 23      |
| DS | Ursolicacid     | PRLR    | 48      |
| DS | Ursolicacid     | PGR     | 48      |
| DS | Ursolicacid     | FADS1   | 48      |
| DS | Ursolicacid     | ELOVL4  | 48      |
| DS | Ursolicacid     | COX5B   | 23      |
| DS | Ursolicacid     | COX5A   | 23      |
| DS | Ursolicacid     | PLA2G1B | 23      |
| DS | Ursolicacid     | COX6B1  | 23      |
| DS | Ursolicacid     | COX8A   | 23      |
| DS | Dihydrokaranone | CYP17A1 | 122.778 |
| DS | Dihydrokaranone | PDE7B   | 80.882  |
| DS | Dihydrokaranone | PDE3A   | 80.882  |
| DS | Dihydrokaranone | PIK3CD  | 80.882  |
| DS | Dihydrokaranone | PDE1A   | 80.882  |

|    |                 |          |         |
|----|-----------------|----------|---------|
| DS | Dihidrokaranone | PDE7A    | 80.882  |
| DS | Dihidrokaranone | PDE1C    | 80.882  |
| DS | Dihidrokaranone | ADORA1   | 80.882  |
| DS | Dihidrokaranone | PDE6C    | 80.882  |
| DS | Dihidrokaranone | PIK3R1   | 55.444  |
| DS | Dihidrokaranone | ADA      | 55.444  |
| DS | Dihidrokaranone | NR3C1    | 48      |
| DS | Dihidrokaranone | TNFSF11  | 22.373  |
| DS | Dihidrokaranone | PHB      | 22.373  |
| DS | Dihidrokaranone | TOX3     | 22.373  |
| DS | Dihidrokaranone | GNAT1    | 22.373  |
| DS | Dihidrokaranone | KHDRBS1  | 22.373  |
| DS | Dihidrokaranone | SPI1     | 22.373  |
| DS | Dihidrokaranone | XRCC4    | 22.373  |
| DS | Dihidrokaranone | HCN4     | 22.373  |
| DS | Dihidrokaranone | GNAT3    | 22.373  |
| DS | Dihidrokaranone | YWHAE    | 22.373  |
| DS | Dihidrokaranone | NUDT9    | 22.373  |
| DS | Dihidrokaranone | AGT      | 22.373  |
| DS | Dihidrokaranone | CXCL13   | 22.373  |
| DS | Dihidrokaranone | PTK2B    | 22.373  |
| DS | Dihidrokaranone | ADRB1    | 22.373  |
| DS | Dihidrokaranone | LRRC8A   | 22.373  |
| DS | Dihidrokaranone | GHRL     | 22.373  |
| DS | Dihidrokaranone | C5       | 22.373  |
| DS | Dihidrokaranone | CHRNA3   | 22.373  |
| DS | Dihidrokaranone | HSP90AB1 | 22.373  |
| DS | Dihidrokaranone | SLC6A4   | 22.373  |
| DS | Dihidrokaranone | TET1     | 22.373  |
| DS | Dihidrokaranone | KCNH2    | 22.373  |
| DS | Dihidrokaranone | MTOR     | 22.373  |
| DS | Dihidrokaranone | ZFPM1    | 22.373  |
| DS | Dihidrokaranone | ZFP42    | 22.373  |
| DS | Dihidrokaranone | CAMK2D   | 22.373  |
| DS | Dihidrokaranone | ATP1A1   | 22.373  |
| DS | Dihidrokaranone | SMO      | 22.373  |
| DS | Dihidrokaranone | AQP1     | 22.373  |
| DS | Dihidrokaranone | FKBP1B   | 22.373  |
| DS | Dihidrokaranone | ATP2B4   | 22.373  |
| DS | Dihidrokaranone | HPS4     | 22.373  |
| DS | Dihidrokaranone | RYR2     | 22.373  |
| DS | Dihidrokaranone | GPER1    | 22.373  |
| DS | Dihidrokaranone | XRCC6BP1 | 22.373  |
| DS | Dihidrokaranone | NOS1     | 22.373  |
| DS | Dihidrokaranone | SOX9     | 22.373  |
| DS | Dihidrokaranone | CAMK2G   | 22.373  |
| DS | Dihidrokaranone | GNAS     | 22.373  |
| DS | Dihidrokaranone | TRIM24   | 22.373  |
| DS | Dihidrokaranone | NFX1     | 22.373  |
| DS | Dihidrokaranone | ESR1     | 122.778 |
| DS | Dihidrokaranone | PDE5A    | 80.882  |



|    |                 |         |        |
|----|-----------------|---------|--------|
| DS | Dihidrokaranone | ADORA2A | 80.882 |
| DS | Dihidrokaranone | PDE3B   | 80.882 |
| DS | Dihidrokaranone | PDE4D   | 80.882 |
| DS | Dihidrokaranone | ITPR3   | 80.882 |
| DS | Dihidrokaranone | ATM     | 80.882 |
| DS | Dihidrokaranone | CYP19A1 | 80.882 |
| DS | Dihidrokaranone | PDE11A  | 80.882 |
| DS | Dihidrokaranone | WNT4    | 55.444 |
| DS | Dihidrokaranone | HAP1    | 55.444 |
| DS | Dihidrokaranone | ANXA1   | 48     |
| DS | Dihidrokaranone | NT5C1A  | 22.373 |
| DS | Dihidrokaranone | SIRT1   | 22.373 |
| DS | Dihidrokaranone | UTS2    | 22.373 |
| DS | Dihidrokaranone | SIX1    | 22.373 |
| DS | Dihidrokaranone | PPP3CB  | 22.373 |
| DS | Dihidrokaranone | HOMER1  | 22.373 |
| DS | Dihidrokaranone | MED1    | 22.373 |
| DS | Dihidrokaranone | EDN1    | 22.373 |
| DS | Dihidrokaranone | HELB    | 22.373 |
| DS | Dihidrokaranone | CETN2   | 22.373 |
| DS | Dihidrokaranone | PIK3CG  | 22.373 |
| DS | Dihidrokaranone | FER     | 22.373 |
| DS | Dihidrokaranone | ARID1A  | 22.373 |
| DS | Dihidrokaranone | LIG4    | 22.373 |
| DS | Dihidrokaranone | ADAM8   | 22.373 |
| DS | Dihidrokaranone | FGFR2   | 22.373 |
| DS | Dihidrokaranone | BCL11B  | 22.373 |
| DS | Dihidrokaranone | SREBF1  | 22.373 |
| DS | Dihidrokaranone | TCF3    | 22.373 |
| DS | Dihidrokaranone | HIBADH  | 22.373 |
| DS | Dihidrokaranone | HMGCR   | 22.373 |
| DS | Dihidrokaranone | C2CD5   | 22.373 |
| DS | Dihidrokaranone | MMP28   | 22.373 |
| DS | Dihidrokaranone | WNT10B  | 22.373 |
| DS | Dihidrokaranone | GATA3   | 22.373 |
| DS | Dihidrokaranone | PIK3R6  | 22.373 |
| DS | Dihidrokaranone | ADRA1B  | 22.373 |
| DS | Dihidrokaranone | RYR3    | 22.373 |
| DS | Dihidrokaranone | RAG1    | 22.373 |
| DS | Dihidrokaranone | TNFAIP3 | 22.373 |
| DS | Dihidrokaranone | CDC42   | 22.373 |
| DS | Dihidrokaranone | CTNNB1  | 22.373 |
| DS | Dihidrokaranone | TKT     | 22.373 |
| DS | Dihidrokaranone | CD34    | 22.373 |
| DS | Dihidrokaranone | CBFA2T3 | 22.373 |
| DS | Dihidrokaranone | PARP10  | 22.373 |
| DS | Dihidrokaranone | TREM1   | 22.373 |
| DS | Dihidrokaranone | BMP5    | 22.373 |
| DS | Dihidrokaranone | LAMP2   | 22.373 |
| DS | Dihidrokaranone | NCBP2   | 22.373 |
| DS | Dihidrokaranone | REST    | 22.373 |

|    |                 |          |         |
|----|-----------------|----------|---------|
| DS | Dihidrokaranone | TAS1R2   | 22.373  |
| DS | Dihidrokaranone | PGR      | 122.778 |
| DS | Dihidrokaranone | PDE9A    | 80.882  |
| DS | Dihidrokaranone | ITPR1    | 80.882  |
| DS | Dihidrokaranone | PGD      | 80.882  |
| DS | Dihidrokaranone | PIK3CB   | 80.882  |
| DS | Dihidrokaranone | POLA2    | 80.882  |
| DS | Dihidrokaranone | PDE6B    | 80.882  |
| DS | Dihidrokaranone | PDE8B    | 80.882  |
| DS | Dihidrokaranone | PDE8A    | 80.882  |
| DS | Dihidrokaranone | TACR2    | 55.444  |
| DS | Dihidrokaranone | IDNK     | 55.444  |
| DS | Dihidrokaranone | HDAC1    | 23      |
| DS | Dihidrokaranone | ACTN3    | 22.373  |
| DS | Dihidrokaranone | DGKI     | 22.373  |
| DS | Dihidrokaranone | STUB1    | 22.373  |
| DS | Dihidrokaranone | QDPR     | 22.373  |
| DS | Dihidrokaranone | SYT2     | 22.373  |
| DS | Dihidrokaranone | SHANK3   | 22.373  |
| DS | Dihidrokaranone | NKX3-1   | 22.373  |
| DS | Dihidrokaranone | CACNA1A  | 22.373  |
| DS | Dihidrokaranone | COMT     | 22.373  |
| DS | Dihidrokaranone | POLA1    | 22.373  |
| DS | Dihidrokaranone | BMP2     | 22.373  |
| DS | Dihidrokaranone | SHH      | 22.373  |
| DS | Dihidrokaranone | FGF10    | 22.373  |
| DS | Dihidrokaranone | ADRBK1   | 22.373  |
| DS | Dihidrokaranone | VT11A    | 22.373  |
| DS | Dihidrokaranone | AURKA    | 22.373  |
| DS | Dihidrokaranone | BCL2     | 22.373  |
| DS | Dihidrokaranone | DRD2     | 22.373  |
| DS | Dihidrokaranone | SRC      | 22.373  |
| DS | Dihidrokaranone | STAP1    | 22.373  |
| DS | Dihidrokaranone | HIPK2    | 22.373  |
| DS | Dihidrokaranone | CSF2     | 22.373  |
| DS | Dihidrokaranone | HIF1A    | 22.373  |
| DS | Dihidrokaranone | SLC18A3  | 22.373  |
| DS | Dihidrokaranone | UBR5     | 22.373  |
| DS | Dihidrokaranone | PF4      | 22.373  |
| DS | Dihidrokaranone | IL10     | 22.373  |
| DS | Dihidrokaranone | PPP3R1   | 22.373  |
| DS | Dihidrokaranone | RAB8B    | 22.373  |
| DS | Dihidrokaranone | TAC4     | 22.373  |
| DS | Dihidrokaranone | IL4      | 22.373  |
| DS | Dihidrokaranone | PGLS     | 22.373  |
| DS | Dihidrokaranone | DRD1     | 22.373  |
| DS | Dihidrokaranone | HSP90AA1 | 22.373  |
| DS | Dihidrokaranone | CALHM1   | 22.373  |
| DS | Dihidrokaranone | HPRT1    | 22.373  |
| DS | Dihidrokaranone | TAL1     | 22.373  |
| DS | Dihidrokaranone | PDGFB    | 22.373  |

|    |                 |          |         |
|----|-----------------|----------|---------|
| DS | Dihidrokaranone | NEFH     | 22.373  |
| DS | Dihidrokaranone | TPM1     | 22.373  |
| DS | Dihidrokaranone | CRHR2    | 22.373  |
| DS | Dihidrokaranone | OPRK1    | 122.778 |
| DS | Dihidrokaranone | PDE4A    | 80.882  |
| DS | Dihidrokaranone | PDE6A    | 80.882  |
| DS | Dihidrokaranone | PIK3CA   | 80.882  |
| DS | Dihidrokaranone | ITPR2    | 80.882  |
| DS | Dihidrokaranone | PDE4C    | 80.882  |
| DS | Dihidrokaranone | PDE4B    | 80.882  |
| DS | Dihidrokaranone | NT5E     | 80.882  |
| DS | Dihidrokaranone | RINT1    | 55.444  |
| DS | Dihidrokaranone | AMPD3    | 55.444  |
| DS | Dihidrokaranone | SRD5A1   | 48      |
| DS | Dihidrokaranone | TFAP2C   | 22.373  |
| DS | Dihidrokaranone | NOS1AP   | 22.373  |
| DS | Dihidrokaranone | FKBP1A   | 22.373  |
| DS | Dihidrokaranone | CTR9     | 22.373  |
| DS | Dihidrokaranone | TGFB1    | 22.373  |
| DS | Dihidrokaranone | SIX4     | 22.373  |
| DS | Dihidrokaranone | TAS1R1   | 22.373  |
| DS | Dihidrokaranone | UBE2B    | 22.373  |
| DS | Dihidrokaranone | STAT5A   | 22.373  |
| DS | Dihidrokaranone | SLC26A6  | 22.373  |
| DS | Dihidrokaranone | CRP      | 22.373  |
| DS | Dihidrokaranone | TNF      | 22.373  |
| DS | Dihidrokaranone | SERPINB3 | 22.373  |
| DS | Dihidrokaranone | KCNB1    | 22.373  |
| DS | Dihidrokaranone | MAOB     | 22.373  |
| DS | Dihidrokaranone | SLC44A4  | 22.373  |
| DS | Dihidrokaranone | MCM3     | 22.373  |
| DS | Dihidrokaranone | 8-Mar    | 22.373  |
| DS | Dihidrokaranone | PLN      | 22.373  |
| DS | Dihidrokaranone | LONP1    | 22.373  |
| DS | Dihidrokaranone | HRC      | 22.373  |
| DS | Dihidrokaranone | PPP3CA   | 22.373  |
| DS | Dihidrokaranone | TALDO1   | 22.373  |
| DS | Dihidrokaranone | KIT      | 22.373  |
| DS | Dihidrokaranone | ABCC4    | 22.373  |
| DS | Dihidrokaranone | AREG     | 22.373  |
| DS | Dihidrokaranone | ATP1A2   | 22.373  |
| DS | Dihidrokaranone | NEFL     | 22.373  |
| DS | Dihidrokaranone | SPX      | 22.373  |
| DS | Dihidrokaranone | DKK3     | 22.373  |
| DS | Dihidrokaranone | DPPA3    | 22.373  |
| DS | Dihidrokaranone | POLB     | 22.373  |
| DS | Dihidrokaranone | SLC9A3R1 | 22.373  |
| DS | Dihidrokaranone | ADAP1    | 22.373  |
| DS | Dihidrokaranone | LTA      | 22.373  |
| DS | Dihidrokaranone | WNT5A    | 22.373  |
| DS | Dihidrokaranone | AMICA1   | 22.373  |

|    |                 |         |         |
|----|-----------------|---------|---------|
| DS | Dihidrokaranone | ALAD    | 22.373  |
| DS | Dihidrokaranone | RTN2    | 22.373  |
| DS | Dihidrokaranone | GLYR1   | 22.373  |
| DS | Dihidrokaranone | PIK3R5  | 22.373  |
| DS | Dihidrokaranone | HCN2    | 22.373  |
| DS | Dihidrokaranone | NR3C2   | 122.778 |
| DS | Dihidrokaranone | RYR1    | 80.882  |
| DS | Dihidrokaranone | PRKDC   | 80.882  |
| DS | Dihidrokaranone | ADORA2B | 80.882  |
| DS | Dihidrokaranone | PDE1B   | 80.882  |
| DS | Dihidrokaranone | PDE10A  | 80.882  |
| DS | Dihidrokaranone | PDE2A   | 80.882  |
| DS | Dihidrokaranone | HDAC2   | 80.882  |
| DS | Dihidrokaranone | RIPK1   | 55.444  |
| DS | Dihidrokaranone | CX3CR1  | 55.444  |
| DS | Dihidrokaranone | AR      | 48      |
| DS | Dihidrokaranone | HMGA2   | 22.373  |
| DS | Dihidrokaranone | TAC1    | 22.373  |
| DS | Dihidrokaranone | FURIN   | 22.373  |
| DS | Dihidrokaranone | G6PD    | 22.373  |
| DS | Dihidrokaranone | ATP11C  | 22.373  |
| DS | Dihidrokaranone | SIRT2   | 22.373  |
| DS | Dihidrokaranone | TRIM28  | 22.373  |
| DS | Dihidrokaranone | ESR2    | 22.373  |
| DS | Dihidrokaranone | TP53    | 22.373  |
| DS | Dihidrokaranone | ADRA2A  | 22.373  |
| DS | Dihidrokaranone | CETN1   | 22.373  |
| DS | Dihidrokaranone | NEDD4   | 22.373  |
| DS | Dihidrokaranone | FOXP3   | 22.373  |
| DS | Dihidrokaranone | LEF1    | 22.373  |
| DS | Dihidrokaranone | SORCS3  | 22.373  |
| DS | Dihidrokaranone | ADAP2   | 22.373  |
| DS | Dihidrokaranone | VCP     | 22.373  |
| DS | Dihidrokaranone | GAS6    | 22.373  |
| DS | Dihidrokaranone | DNM3    | 22.373  |
| DS | Dihidrokaranone | XCL1    | 22.373  |
| DS | Dihidrokaranone | UTS2R   | 22.373  |
| DS | Dihidrokaranone | RAPGEF2 | 22.373  |
| DS | Dihidrokaranone | BDKRB2  | 22.373  |
| DS | Dihidrokaranone | INS     | 22.373  |
| DS | Dihidrokaranone | BNIP3   | 22.373  |
| DS | Dihidrokaranone | CRH     | 22.373  |
| DS | Dihidrokaranone | AVPR2   | 22.373  |
| DS | Dihidrokaranone | UCN2    | 22.373  |
| DS | Dihidrokaranone | ATP2A1  | 22.373  |
| DS | Dihidrokaranone | AHCYL1  | 22.373  |
| DS | Dihidrokaranone | CASQ1   | 22.373  |
| DS | Dihidrokaranone | IDO1    | 22.373  |
| DS | Dihidrokaranone | IGF2    | 22.373  |
| DS | Dihidrokaranone | EDA     | 22.373  |
| DS | Dihidrokaranone | SPR     | 22.373  |

|    |                 |          |         |
|----|-----------------|----------|---------|
| DS | Dihydrokaranone | SELP     | 22.373  |
| DS | Dihydrokaranone | TAS1R3   | 22.373  |
| DS | Dihydrokaranone | PAWR     | 22.373  |
| DS | Dihydrokaranone | CD63     | 22.373  |
| DS | Dihydrokaranone | VDR      | 22.373  |
| DS | Dihydrokaranone | PCSK6    | 22.373  |
| DS | Dihydrokaranone | RAG2     | 22.373  |
| DS | Salviol         | ESR2     | 122.778 |
| DS | Salviol         | ALOX5    | 48      |
| DS | Salviol         | MED1     | 22.373  |
| DS | Salviol         | PGR      | 22.373  |
| DS | Salviol         | GPER1    | 22.373  |
| DS | Salviol         | TRIM24   | 22.373  |
| DS | Salviol         | ESR1     | 122.778 |
| DS | Salviol         | TFAP2C   | 22.373  |
| DS | Salviol         | NKX3-1   | 22.373  |
| DS | Salviol         | ABCG2    | 22.373  |
| DS | Salviol         | WNT5A    | 22.373  |
| DS | Salviol         | NR1I2    | 122.778 |
| DS | Salviol         | SLC2A1   | 22.373  |
| DS | Salviol         | SHH      | 22.373  |
| DS | Salviol         | WNT4     | 22.373  |
| DS | Salviol         | SOX9     | 22.373  |
| DS | Salviol         | OPRK1    | 48      |
| DS | Salviol         | TOX3     | 22.373  |
| DS | Salviol         | LEF1     | 22.373  |
| DS | Salviol         | AREG     | 22.373  |
| DS | Salviol         | VDR      | 22.373  |
| DS | Salviol         | OPRM1    | 48      |
| DS | Salviol         | TGFB1    | 22.373  |
| DS | Salviol         | FGFR2    | 22.373  |
| DS | Salviol         | ABCB4    | 22.373  |
| DS | Salviol         | ABCB1    | 22.373  |
| DH | Sennidin A      | PPARG    | 23      |
| DH | Sennidin A      | MPL      | 23      |
| DH | Sennidin A      | IL1B     | 22.373  |
| DH | Sennidin A      | FPGS     | 23      |
| DH | Sennidin A      | TYMS     | 23      |
| DH | Sennidin A      | IL13     | 22.373  |
| DH | Sennidin A      | PTGS1    | 23      |
| DH | Sennidin A      | APOA2    | 22.373  |
| DH | Sennidin A      | GGH      | 22.373  |
| DH | Sennidin A      | PTGS2    | 23      |
| DH | Sennidin A      | SHMT1    | 22.373  |
| DH | Sennidin A      | SERPINB7 | 22.373  |
| DH | Sennidin A      | ALOX5    | 23      |
| DH | Sennidin A      | SERPINE1 | 22.373  |
| DH | Aloe-Emodin     | CHRM3    | 23      |
| DH | Aloe-Emodin     | CHRM1    | 23      |
| DH | Aloe-Emodin     | CHRM2    | 23      |
| DH | Aloe-Emodin     | CHRM4    | 23      |

|    |                                                        |          |        |
|----|--------------------------------------------------------|----------|--------|
| DH | 3-Hydroxy-25-Norfriedel-3,1(10)-Dien-2-One-30-Oic Acid | SLC8A1   | 48     |
| DH | 3-Hydroxy-25-Norfriedel-3,1(10)-Dien-2-One-31-Oic Acid | NR3C1    | 48     |
| DH | 3-Hydroxy-25-Norfriedel-3,1(10)-Dien-2-One-32-Oic Acid | ELOVL4   | 48     |
| DH | 3-Hydroxy-25-Norfriedel-3,1(10)-Dien-2-One-33-Oic Acid | SHMT1    | 23     |
| DH | 3-Hydroxy-25-Norfriedel-3,1(10)-Dien-2-One-34-Oic Acid | ALDH1L1  | 23     |
| DH | 3-Hydroxy-25-Norfriedel-3,1(10)-Dien-2-One-35-Oic Acid | DHFR     | 23     |
| DH | 3-Hydroxy-25-Norfriedel-3,1(10)-Dien-2-One-36-Oic Acid | NR0B1    | 48     |
| DH | 3-Hydroxy-25-Norfriedel-3,1(10)-Dien-2-One-37-Oic Acid | FADS2    | 48     |
| DH | 3-Hydroxy-25-Norfriedel-3,1(10)-Dien-2-One-38-Oic Acid | HSD11B1  | 48     |
| DH | 3-Hydroxy-25-Norfriedel-3,1(10)-Dien-2-One-39-Oic Acid | GART     | 23     |
| DH | 3-Hydroxy-25-Norfriedel-3,1(10)-Dien-2-One-40-Oic Acid | AMT      | 23     |
| DH | 3-Hydroxy-25-Norfriedel-3,1(10)-Dien-2-One-41-Oic Acid | FOLR3    | 23     |
| DH | 3-Hydroxy-25-Norfriedel-3,1(10)-Dien-2-One-42-Oic Acid | TRPV1    | 48     |
| DH | 3-Hydroxy-25-Norfriedel-3,1(10)-Dien-2-One-43-Oic Acid | FADS1    | 48     |
| DH | 3-Hydroxy-25-Norfriedel-3,1(10)-Dien-2-One-44-Oic Acid | ANXA1    | 48     |
| DH | 3-Hydroxy-25-Norfriedel-3,1(10)-Dien-2-One-45-Oic Acid | MTHFD2   | 23     |
| DH | 3-Hydroxy-25-Norfriedel-3,1(10)-Dien-2-One-46-Oic Acid | MTFMT    | 23     |
| DH | 3-Hydroxy-25-Norfriedel-3,1(10)-Dien-2-One-47-Oic Acid | FTCD     | 23     |
| DH | 3-Hydroxy-25-Norfriedel-3,1(10)-Dien-2-One-48-Oic Acid | NOS2     | 48     |
| DH | 3-Hydroxy-25-Norfriedel-3,1(10)-Dien-2-One-49-Oic Acid | PTGS1    | 48     |
| DH | 3-Hydroxy-25-Norfriedel-3,1(10)-Dien-2-One-50-Oic Acid | CYP19A1  | 48     |
| DH | 3-Hydroxy-25-Norfriedel-3,1(10)-Dien-2-One-51-Oic Acid | MTR      | 23     |
| DH | 3-Hydroxy-25-Norfriedel-3,1(10)-Dien-2-One-52-Oic Acid | ATIC     | 23     |
| DH | 3-Hydroxy-25-Norfriedel-3,1(10)-Dien-2-One-53-Oic Acid | TYMS     | 23     |
| DH | 3-Hydroxy-25-Norfriedel-3,1(10)-Dien-2-One-54-Oic Acid | AR       | 48     |
| DH | 3-Hydroxy-25-Norfriedel-3,1(10)-Dien-2-One-55-Oic Acid | PTGS2    | 48     |
| DH | 3-Hydroxy-25-Norfriedel-3,1(10)-Dien-2-One-56-Oic Acid | FOLR2    | 23     |
| DH | 3-Hydroxy-25-Norfriedel-3,1(10)-Dien-2-One-57-Oic Acid | MTHFD1   | 23     |
| DH | 3-Hydroxy-25-Norfriedel-3,1(10)-Dien-2-One-58-Oic Acid | SHMT2    | 23     |
| DH | 3-Hydroxy-25-Norfriedel-3,1(10)-Dien-2-One-59-Oic Acid | MTHFR    | 23     |
| DH | Palmidin B                                             | CHRM3    | 23     |
| DH | Palmidin B                                             | CHRM1    | 23     |
| DH | Palmidin B                                             | CHRM2    | 23     |
| DH | Palmidin B                                             | CHRM4    | 23     |
| DH | 5-Acetyl-7-Hydroxy-2-Methylbenzopyran-Gamma-One        | VKORC1   | 80.882 |
| DH | 5-Acetyl-7-Hydroxy-2-Methylbenzopyran-Gamma-One        | CBR1     | 22.373 |
| DH | 5-Acetyl-7-Hydroxy-2-Methylbenzopyran-Gamma-One        | VKORC1L1 | 55.444 |
| DH | 5-Acetyl-7-Hydroxy-2-Methylbenzopyran-Gamma-One        | CYP4F2   | 22.373 |
| DH | 5-Acetyl-7-Hydroxy-2-Methylbenzopyran-Gamma-One        | CYP4F11  | 22.373 |
| DH | 5-Acetyl-7-Hydroxy-2-Methylbenzopyran-Gamma-One        | UBIAD1   | 22.373 |
| DH | Rheinoside A                                           | TOP2A    | 48     |
| DH | Rheinoside A                                           | CHD1     | 48     |
| DH | Rheinoside A                                           | TOP2B    | 48     |
| DH | Rhein                                                  | PPARG    | 23     |
| DH | Rhein                                                  | MPL      | 23     |
| DH | Rhein                                                  | IL1B     | 22.373 |
| DH | Rhein                                                  | FPGS     | 23     |
| DH | Rhein                                                  | TYMS     | 23     |
| DH | Rhein                                                  | IL13     | 22.373 |
| DH | Rhein                                                  | PTGS1    | 23     |
| DH | Rhein                                                  | APOA2    | 22.373 |

|    |                            |          |        |
|----|----------------------------|----------|--------|
| DH | Rhein                      | GGH      | 22.373 |
| DH | Rhein                      | PTGS2    | 23     |
| DH | Rhein                      | SHMT1    | 22.373 |
| DH | Rhein                      | SERPINB7 | 22.373 |
| DH | Rhein                      | ALOX5    | 23     |
| DH | Rhein                      | SERPINE1 | 22.373 |
| DH | Rhapontigenin              | CNR2     | 23     |
| DH | Rhapontigenin              | TYR      | 23     |
| DH | Rhapontigenin              | CNR1     | 23     |
| DH | Rottlerin                  | SOAT1    | 23     |
| DH | Rottlerin                  | DRD2     | 22.373 |
| DH | Rottlerin                  | MTTP     | 23     |
| DH | Rottlerin                  | PAWR     | 22.373 |
| DH | Rottlerin                  | CNR2     | 23     |
| DH | Rottlerin                  | CNR1     | 23     |
| DH | Rottlerin                  | SOAT2    | 23     |
| DH | (E)-4-Phenyl-3-Buten-2-One | HTR4     | 80.882 |
| DH | (E)-4-Phenyl-3-Buten-2-One | NQO2     | 80.882 |
| DH | (E)-4-Phenyl-3-Buten-2-One | GGCX     | 80.882 |
| DH | (E)-4-Phenyl-3-Buten-2-One | OPRM1    | 80.882 |
| DH | (E)-4-Phenyl-3-Buten-2-One | HTR1A    | 80.882 |
| DH | (E)-4-Phenyl-3-Buten-2-One | AGTR1    | 80.882 |
| DH | (E)-4-Phenyl-3-Buten-2-One | AVP      | 55.444 |
| DH | (E)-4-Phenyl-3-Buten-2-One | WLS      | 55.444 |
| DH | (E)-4-Phenyl-3-Buten-2-One | PCK1     | 22.373 |
| DH | (E)-4-Phenyl-3-Buten-2-One | CSF1     | 22.373 |
| DH | (E)-4-Phenyl-3-Buten-2-One | FNDC5    | 22.373 |
| DH | (E)-4-Phenyl-3-Buten-2-One | CA7      | 22.373 |
| DH | (E)-4-Phenyl-3-Buten-2-One | SLC38A3  | 22.373 |
| DH | (E)-4-Phenyl-3-Buten-2-One | RXFP4    | 22.373 |
| DH | (E)-4-Phenyl-3-Buten-2-One | MAPK9    | 22.373 |
| DH | (E)-4-Phenyl-3-Buten-2-One | MC4R     | 22.373 |
| DH | (E)-4-Phenyl-3-Buten-2-One | MTNR1B   | 22.373 |
| DH | (E)-4-Phenyl-3-Buten-2-One | MAS1     | 22.373 |
| DH | (E)-4-Phenyl-3-Buten-2-One | S1PR2    | 22.373 |
| DH | (E)-4-Phenyl-3-Buten-2-One | HEG1     | 22.373 |
| DH | (E)-4-Phenyl-3-Buten-2-One | CDH5     | 22.373 |
| DH | (E)-4-Phenyl-3-Buten-2-One | KCNK4    | 22.373 |
| DH | (E)-4-Phenyl-3-Buten-2-One | SLC6A4   | 22.373 |
| DH | (E)-4-Phenyl-3-Buten-2-One | HTR3D    | 22.373 |
| DH | (E)-4-Phenyl-3-Buten-2-One | ANAPC2   | 22.373 |
| DH | (E)-4-Phenyl-3-Buten-2-One | BICD1    | 22.373 |
| DH | (E)-4-Phenyl-3-Buten-2-One | RET      | 22.373 |
| DH | (E)-4-Phenyl-3-Buten-2-One | SOD2     | 22.373 |
| DH | (E)-4-Phenyl-3-Buten-2-One | STATH    | 22.373 |
| DH | (E)-4-Phenyl-3-Buten-2-One | TMBIM6   | 22.373 |
| DH | (E)-4-Phenyl-3-Buten-2-One | SNCA     | 22.373 |
| DH | (E)-4-Phenyl-3-Buten-2-One | ADORA1   | 22.373 |
| DH | (E)-4-Phenyl-3-Buten-2-One | EGFR     | 22.373 |
| DH | (E)-4-Phenyl-3-Buten-2-One | CCM2L    | 22.373 |
| DH | (E)-4-Phenyl-3-Buten-2-One | GABRA2   | 80.882 |

|    |                            |          |        |
|----|----------------------------|----------|--------|
| DH | (E)-4-Phenyl-3-Buten-2-One | HTR1B    | 80.882 |
| DH | (E)-4-Phenyl-3-Buten-2-One | F10      | 80.882 |
| DH | (E)-4-Phenyl-3-Buten-2-One | AGTR2    | 80.882 |
| DH | (E)-4-Phenyl-3-Buten-2-One | PTGS2    | 80.882 |
| DH | (E)-4-Phenyl-3-Buten-2-One | VKORC1L1 | 80.882 |
| DH | (E)-4-Phenyl-3-Buten-2-One | PAX2     | 55.444 |
| DH | (E)-4-Phenyl-3-Buten-2-One | GPR27    | 55.444 |
| DH | (E)-4-Phenyl-3-Buten-2-One | ADCY6    | 22.373 |
| DH | (E)-4-Phenyl-3-Buten-2-One | IL34     | 22.373 |
| DH | (E)-4-Phenyl-3-Buten-2-One | ACIN1    | 22.373 |
| DH | (E)-4-Phenyl-3-Buten-2-One | ADRB2    | 22.373 |
| DH | (E)-4-Phenyl-3-Buten-2-One | CCL5     | 22.373 |
| DH | (E)-4-Phenyl-3-Buten-2-One | METRNL   | 22.373 |
| DH | (E)-4-Phenyl-3-Buten-2-One | LILRB1   | 22.373 |
| DH | (E)-4-Phenyl-3-Buten-2-One | CYP4F2   | 22.373 |
| DH | (E)-4-Phenyl-3-Buten-2-One | PPP1R1B  | 22.373 |
| DH | (E)-4-Phenyl-3-Buten-2-One | BMP6     | 22.373 |
| DH | (E)-4-Phenyl-3-Buten-2-One | EGR1     | 22.373 |
| DH | (E)-4-Phenyl-3-Buten-2-One | AGTRAP   | 22.373 |
| DH | (E)-4-Phenyl-3-Buten-2-One | TFPI     | 22.373 |
| DH | (E)-4-Phenyl-3-Buten-2-One | SOD1     | 22.373 |
| DH | (E)-4-Phenyl-3-Buten-2-One | ARRB1    | 22.373 |
| DH | (E)-4-Phenyl-3-Buten-2-One | NEUROD2  | 22.373 |
| DH | (E)-4-Phenyl-3-Buten-2-One | WNT11    | 22.373 |
| DH | (E)-4-Phenyl-3-Buten-2-One | ACSL4    | 22.373 |
| DH | (E)-4-Phenyl-3-Buten-2-One | LRRK2    | 22.373 |
| DH | (E)-4-Phenyl-3-Buten-2-One | MC5R     | 22.373 |
| DH | (E)-4-Phenyl-3-Buten-2-One | HTR3E    | 22.373 |
| DH | (E)-4-Phenyl-3-Buten-2-One | NAPRT    | 22.373 |
| DH | (E)-4-Phenyl-3-Buten-2-One | NCK1     | 22.373 |
| DH | (E)-4-Phenyl-3-Buten-2-One | ALOX15   | 22.373 |
| DH | (E)-4-Phenyl-3-Buten-2-One | CBR1     | 22.373 |
| DH | (E)-4-Phenyl-3-Buten-2-One | PROS1    | 80.882 |
| DH | (E)-4-Phenyl-3-Buten-2-One | GABRA3   | 80.882 |
| DH | (E)-4-Phenyl-3-Buten-2-One | VKORC1   | 80.882 |
| DH | (E)-4-Phenyl-3-Buten-2-One | BGLAP    | 80.882 |
| DH | (E)-4-Phenyl-3-Buten-2-One | HTR3A    | 80.882 |
| DH | (E)-4-Phenyl-3-Buten-2-One | F2       | 80.882 |
| DH | (E)-4-Phenyl-3-Buten-2-One | DAB2     | 55.444 |
| DH | (E)-4-Phenyl-3-Buten-2-One | SERPINB7 | 55.444 |
| DH | (E)-4-Phenyl-3-Buten-2-One | NAMPT    | 22.373 |
| DH | (E)-4-Phenyl-3-Buten-2-One | C1QTNF1  | 22.373 |
| DH | (E)-4-Phenyl-3-Buten-2-One | ANG      | 22.373 |
| DH | (E)-4-Phenyl-3-Buten-2-One | WT1      | 22.373 |
| DH | (E)-4-Phenyl-3-Buten-2-One | PLA2R1   | 22.373 |
| DH | (E)-4-Phenyl-3-Buten-2-One | PPP1R9B  | 22.373 |
| DH | (E)-4-Phenyl-3-Buten-2-One | PKD2     | 22.373 |
| DH | (E)-4-Phenyl-3-Buten-2-One | CRHBP    | 22.373 |
| DH | (E)-4-Phenyl-3-Buten-2-One | HTN1     | 22.373 |
| DH | (E)-4-Phenyl-3-Buten-2-One | MAOB     | 22.373 |
| DH | (E)-4-Phenyl-3-Buten-2-One | SERPINF2 | 22.373 |



|    |                            |          |        |
|----|----------------------------|----------|--------|
| DH | (E)-4-Phenyl-3-Buten-2-One | BCL2     | 22.373 |
| DH | (E)-4-Phenyl-3-Buten-2-One | OXTR     | 22.373 |
| DH | (E)-4-Phenyl-3-Buten-2-One | CCS      | 22.373 |
| DH | (E)-4-Phenyl-3-Buten-2-One | AIF1     | 22.373 |
| DH | (E)-4-Phenyl-3-Buten-2-One | NMUR2    | 22.373 |
| DH | (E)-4-Phenyl-3-Buten-2-One | RPS6KA2  | 22.373 |
| DH | (E)-4-Phenyl-3-Buten-2-One | CDC20    | 22.373 |
| DH | (E)-4-Phenyl-3-Buten-2-One | SOD3     | 22.373 |
| DH | (E)-4-Phenyl-3-Buten-2-One | MC3R     | 22.373 |
| DH | (E)-4-Phenyl-3-Buten-2-One | DRD5     | 22.373 |
| DH | (E)-4-Phenyl-3-Buten-2-One | MECOM    | 22.373 |
| DH | (E)-4-Phenyl-3-Buten-2-One | ADIPOQ   | 22.373 |
| DH | (E)-4-Phenyl-3-Buten-2-One | ANXA1    | 22.373 |
| DH | (E)-4-Phenyl-3-Buten-2-One | HTR3C    | 22.373 |
| DH | (E)-4-Phenyl-3-Buten-2-One | PROZ     | 80.882 |
| DH | (E)-4-Phenyl-3-Buten-2-One | F7       | 80.882 |
| DH | (E)-4-Phenyl-3-Buten-2-One | JUN      | 80.882 |
| DH | (E)-4-Phenyl-3-Buten-2-One | PTGS1    | 80.882 |
| DH | (E)-4-Phenyl-3-Buten-2-One | GABRA1   | 80.882 |
| DH | (E)-4-Phenyl-3-Buten-2-One | AGT      | 55.444 |
| DH | (E)-4-Phenyl-3-Buten-2-One | MGP      | 55.444 |
| DH | (E)-4-Phenyl-3-Buten-2-One | ACTN2    | 55.444 |
| DH | (E)-4-Phenyl-3-Buten-2-One | RGCC     | 22.373 |
| DH | (E)-4-Phenyl-3-Buten-2-One | MC2R     | 22.373 |
| DH | (E)-4-Phenyl-3-Buten-2-One | CD36     | 22.373 |
| DH | (E)-4-Phenyl-3-Buten-2-One | HNFB1B   | 22.373 |
| DH | (E)-4-Phenyl-3-Buten-2-One | CLDN5    | 22.373 |
| DH | (E)-4-Phenyl-3-Buten-2-One | HTR2B    | 22.373 |
| DH | (E)-4-Phenyl-3-Buten-2-One | AQP2     | 22.373 |
| DH | (E)-4-Phenyl-3-Buten-2-One | CYP11A1  | 22.373 |
| DH | (E)-4-Phenyl-3-Buten-2-One | ACE2     | 22.373 |
| DH | (E)-4-Phenyl-3-Buten-2-One | SIPA1    | 22.373 |
| DH | (E)-4-Phenyl-3-Buten-2-One | SPRY1    | 22.373 |
| DH | (E)-4-Phenyl-3-Buten-2-One | GAS6     | 22.373 |
| DH | (E)-4-Phenyl-3-Buten-2-One | PPP1R15A | 22.373 |
| DH | (E)-4-Phenyl-3-Buten-2-One | UTS2R    | 22.373 |
| DH | (E)-4-Phenyl-3-Buten-2-One | BDKRB2   | 22.373 |
| DH | (E)-4-Phenyl-3-Buten-2-One | INS      | 22.373 |
| DH | (E)-4-Phenyl-3-Buten-2-One | CD47     | 22.373 |
| DH | (E)-4-Phenyl-3-Buten-2-One | SPX      | 22.373 |
| DH | (E)-4-Phenyl-3-Buten-2-One | THRB     | 22.373 |
| DH | (E)-4-Phenyl-3-Buten-2-One | HTR3B    | 22.373 |
| DH | (E)-4-Phenyl-3-Buten-2-One | RFK      | 22.373 |
| DH | (E)-4-Phenyl-3-Buten-2-One | AGER     | 22.373 |
| DH | (E)-4-Phenyl-3-Buten-2-One | CPLX2    | 22.373 |
| DH | (E)-4-Phenyl-3-Buten-2-One | UBIAD1   | 22.373 |
| DH | (E)-4-Phenyl-3-Buten-2-One | GLRA1    | 22.373 |
| DH | (E)-4-Phenyl-3-Buten-2-One | AVPR1A   | 80.882 |
| DH | (E)-4-Phenyl-3-Buten-2-One | F9       | 80.882 |
| DH | (E)-4-Phenyl-3-Buten-2-One | PROC     | 80.882 |
| DH | (E)-4-Phenyl-3-Buten-2-One | AVPR2    | 80.882 |

|    |                              |          |        |
|----|------------------------------|----------|--------|
| DH | (E)-4-Phenyl-3-Buten-2-One   | NQO1     | 80.882 |
| DH | (E)-4-Phenyl-3-Buten-2-One   | CBR4     | 55.444 |
| DH | (E)-4-Phenyl-3-Buten-2-One   | F3       | 55.444 |
| DH | (E)-4-Phenyl-3-Buten-2-One   | NDRG2    | 22.373 |
| DH | (E)-4-Phenyl-3-Buten-2-One   | HACD1    | 22.373 |
| DH | (E)-4-Phenyl-3-Buten-2-One   | UTS2     | 22.373 |
| DH | (E)-4-Phenyl-3-Buten-2-One   | SDC4     | 22.373 |
| DH | (E)-4-Phenyl-3-Buten-2-One   | OXT      | 22.373 |
| DH | (E)-4-Phenyl-3-Buten-2-One   | DCSTAMP  | 22.373 |
| DH | (E)-4-Phenyl-3-Buten-2-One   | COMT     | 22.373 |
| DH | (E)-4-Phenyl-3-Buten-2-One   | MC1R     | 22.373 |
| DH | (E)-4-Phenyl-3-Buten-2-One   | PTGIS    | 22.373 |
| DH | (E)-4-Phenyl-3-Buten-2-One   | CYP4F11  | 22.373 |
| DH | (E)-4-Phenyl-3-Buten-2-One   | AMELX    | 22.373 |
| DH | (E)-4-Phenyl-3-Buten-2-One   | HRH3     | 22.373 |
| DH | (E)-4-Phenyl-3-Buten-2-One   | CTNNBIP1 | 22.373 |
| DH | (E)-4-Phenyl-3-Buten-2-One   | PLA2G1B  | 22.373 |
| DH | (E)-4-Phenyl-3-Buten-2-One   | ACVR2A   | 22.373 |
| DH | (E)-4-Phenyl-3-Buten-2-One   | HCRT     | 22.373 |
| DH | (E)-4-Phenyl-3-Buten-2-One   | ACE      | 22.373 |
| DH | (E)-4-Phenyl-3-Buten-2-One   | ALOX15B  | 22.373 |
| DH | (E)-4-Phenyl-3-Buten-2-One   | UGT3A2   | 22.373 |
| DH | (E)-4-Phenyl-3-Buten-2-One   | REN      | 22.373 |
| DH | (E)-4-Phenyl-3-Buten-2-One   | SPRY2    | 22.373 |
| DH | (E)-4-Phenyl-3-Buten-2-One   | NCK2     | 22.373 |
| DH | (E)-4-Phenyl-3-Buten-2-One   | FGA      | 22.373 |
| DH | (E)-4-Phenyl-3-Buten-2-One   | CA2      | 22.373 |
| DH | (E)-4-Phenyl-3-Buten-2-One   | AVPR1B   | 22.373 |
| DH | (E)-4-Phenyl-3-Buten-2-One   | PRDM16   | 22.373 |
| DH | Aloeemodin                   | CHRM3    | 23     |
| DH | Aloeemodin                   | CHRM1    | 23     |
| DH | Aloeemodin                   | CHRM2    | 23     |
| DH | Aloeemodin                   | CHRM4    | 23     |
| DH | Rhein A                      | PPARG    | 23     |
| DH | Rhein A                      | MPL      | 23     |
| DH | Rhein A                      | IL1B     | 22.373 |
| DH | Rhein A                      | FPGS     | 23     |
| DH | Rhein A                      | TYMS     | 23     |
| DH | Rhein A                      | IL13     | 22.373 |
| DH | Rhein A                      | PTGS1    | 23     |
| DH | Rhein A                      | APOA2    | 22.373 |
| DH | Rhein A                      | GGH      | 22.373 |
| DH | Rhein A                      | PTGS2    | 23     |
| DH | Rhein A                      | SHMT1    | 22.373 |
| DH | Rhein A                      | SERPINB7 | 22.373 |
| DH | Rhein A                      | ALOX5    | 23     |
| DH | Rhein A                      | SERPINE1 | 22.373 |
| DH | 3,4,5-Trihydroxybenzoic Acid | AKR1C1   | 48     |
| DH | 3,4,5-Trihydroxybenzoic Acid | PPARG    | 23     |
| DH | 3,4,5-Trihydroxybenzoic Acid | CHUK     | 23     |
| DH | 3,4,5-Trihydroxybenzoic Acid | PTGS1    | 48     |

|    |                                                   |         |         |
|----|---------------------------------------------------|---------|---------|
| DH | 3,4,5-Trihydroxybenzoic Acid                      | MPO     | 23      |
| DH | 3,4,5-Trihydroxybenzoic Acid                      | PTGS2   | 48      |
| DH | 3,4,5-Trihydroxybenzoic Acid                      | DDC     | 23      |
| DH | 3,4,5-Trihydroxybenzoic Acid                      | PLA2G2E | 23      |
| DH | 3,4,5-Trihydroxybenzoic Acid                      | ALOX5   | 23      |
| DH | 3,4,5-Trihydroxybenzoic Acid                      | AKR1C2  | 23      |
| DH | 3,4,5-Trihydroxybenzoic Acid                      | IKBKB   | 23      |
| DH | 5-Carboxy-7-Hydroxy-2-Methyl-Benzopyran-Gamma-One | S100P   | 48      |
| DH | 5-Carboxy-7-Hydroxy-2-Methyl-Benzopyran-Gamma-One | KCNMA1  | 48      |
| DH | Gallicacid                                        | SEC14L3 | 114.143 |
| DH | Gallicacid                                        | PPP2CB  | 114.143 |
| DH | Gallicacid                                        | AKR1C1  | 48      |
| DH | Gallicacid                                        | AKR1C2  | 23      |
| DH | Gallicacid                                        | CHUK    | 23      |
| DH | Gallicacid                                        | PPP2CA  | 114.143 |
| DH | Gallicacid                                        | SEC14L2 | 114.143 |
| DH | Gallicacid                                        | PTGS1   | 48      |
| DH | Gallicacid                                        | PPARG   | 23      |
| DH | Gallicacid                                        | PRKCA   | 114.143 |
| DH | Gallicacid                                        | DGKA    | 114.143 |
| DH | Gallicacid                                        | PTGS2   | 48      |
| DH | Gallicacid                                        | MPO     | 23      |
| DH | Gallicacid                                        | NR1I2   | 114.143 |
| DH | Gallicacid                                        | PRKCB   | 114.143 |
| DH | Gallicacid                                        | SEC14L6 | 25.857  |
| DH | Gallicacid                                        | DDC     | 23      |
| DH | Gallicacid                                        | ALOX5   | 114.143 |
| DH | Gallicacid                                        | SEC14L4 | 114.143 |
| DH | Gallicacid                                        | PLA2G2E | 23      |
| DH | Gallicacid                                        | IKBKB   | 23      |
| DH | Galocatechin                                      | SEC14L3 | 48      |
| DH | Galocatechin                                      | PRKCA   | 48      |
| DH | Galocatechin                                      | SEC14L2 | 48      |
| DH | Galocatechin                                      | SOAT1   | 48      |
| DH | Galocatechin                                      | NR1I2   | 48      |
| DH | Galocatechin                                      | DGKA    | 48      |
| DH | Galocatechin                                      | MTTP    | 48      |
| DH | Galocatechin                                      | CNR1    | 48      |
| DH | Galocatechin                                      | PRKCB   | 48      |
| DH | Galocatechin                                      | CNR2    | 48      |
| DH | Galocatechin                                      | ALOX5   | 48      |
| DH | Galocatechin                                      | SOAT2   | 48      |
| DH | Galocatechin                                      | PPP2CA  | 48      |
| DH | Galocatechin                                      | PPP2CB  | 48      |
| DH | Galocatechin                                      | SEC14L4 | 48      |
| DH | Rheidin B                                         | PPARG   | 23      |
| DH | Rheidin B                                         | MPL     | 23      |
| DH | Rheidin B                                         | IL1B    | 22.373  |
| DH | Rheidin B                                         | FPGS    | 23      |
| DH | Rheidin B                                         | TYMS    | 23      |
| DH | Rheidin B                                         | IL13    | 22.373  |

|    |             |          |        |
|----|-------------|----------|--------|
| DH | Rheinidin B | PTGS1    | 23     |
| DH | Rheinidin B | APOA2    | 22.373 |
| DH | Rheinidin B | GGH      | 22.373 |
| DH | Rheinidin B | PTGS2    | 23     |
| DH | Rheinidin B | SHMT1    | 22.373 |
| DH | Rheinidin B | SERPINB7 | 22.373 |
| DH | Rheinidin B | ALOX5    | 23     |
| DH | Rheinidin B | SERPINE1 | 22.373 |
| DH | Epicatechin | SEC14L3  | 48     |
| DH | Epicatechin | PRKCA    | 48     |
| DH | Epicatechin | SEC14L2  | 48     |
| DH | Epicatechin | SOAT1    | 48     |
| DH | Epicatechin | NR1I2    | 48     |
| DH | Epicatechin | DGKA     | 48     |
| DH | Epicatechin | MTTP     | 48     |
| DH | Epicatechin | CNR1     | 48     |
| DH | Epicatechin | PRKCB    | 48     |
| DH | Epicatechin | CNR2     | 48     |
| DH | Epicatechin | ALOX5    | 48     |
| DH | Epicatechin | SOAT2    | 48     |
| DH | Epicatechin | PPP2CA   | 48     |
| DH | Epicatechin | PPP2CB   | 48     |
| DH | Epicatechin | SEC14L4  | 48     |
| DH | Toralactone | SEC14L3  | 23     |
| DH | Toralactone | PPP2CB   | 23     |
| DH | Toralactone | PPP2CA   | 23     |
| DH | Toralactone | SEC14L2  | 23     |
| DH | Toralactone | PRKCA    | 23     |
| DH | Toralactone | DGKA     | 23     |
| DH | Toralactone | NR1I2    | 23     |
| DH | Toralactone | PRKCB    | 23     |
| DH | Toralactone | ALOX5    | 23     |
| DH | Toralactone | SEC14L4  | 23     |
| DH | Palmidin C  | ESR1     | 80.882 |
| DH | Palmidin C  | MED1     | 22.373 |
| DH | Palmidin C  | FGFR2    | 22.373 |
| DH | Palmidin C  | WNT5A    | 22.373 |
| DH | Palmidin C  | HSD17B1  | 23     |
| DH | Palmidin C  | NKX3-1   | 22.373 |
| DH | Palmidin C  | PGR      | 22.373 |
| DH | Palmidin C  | SOX9     | 22.373 |
| DH | Palmidin C  | TFAP2C   | 22.373 |
| DH | Palmidin C  | ESR2     | 22.373 |
| DH | Palmidin C  | WNT4     | 22.373 |
| DH | Palmidin C  | VDR      | 22.373 |
| DH | Palmidin C  | TOX3     | 22.373 |
| DH | Palmidin C  | SHH      | 22.373 |
| DH | Palmidin C  | AREG     | 22.373 |
| DH | Palmidin C  | TRIM24   | 22.373 |
| DH | Palmidin C  | TGFB1    | 22.373 |
| DH | Palmidin C  | LEF1     | 22.373 |

|    |              |          |         |
|----|--------------|----------|---------|
| DH | Palmidin C   | GPBR1    | 22.373  |
| DH | Progesterone | CYP17A1  | 686     |
| DH | Progesterone | AR       | 122.778 |
| DH | Progesterone | RYR1     | 80.882  |
| DH | Progesterone | PRKDC    | 80.882  |
| DH | Progesterone | ADORA2B  | 80.882  |
| DH | Progesterone | PDE1B    | 80.882  |
| DH | Progesterone | PDE10A   | 80.882  |
| DH | Progesterone | PDE2A    | 80.882  |
| DH | Progesterone | HDAC2    | 80.882  |
| DH | Progesterone | RIPK1    | 55.444  |
| DH | Progesterone | CX3CR1   | 55.444  |
| DH | Progesterone | PRLR     | 48      |
| DH | Progesterone | MED12    | 26.373  |
| DH | Progesterone | PAK6     | 26.373  |
| DH | Progesterone | PPARGC1A | 26.373  |
| DH | Progesterone | PIAS1    | 26.373  |
| DH | Progesterone | ISL1     | 26.373  |
| DH | Progesterone | SMAD4    | 26.373  |
| DH | Progesterone | BRCA1    | 26.373  |
| DH | Progesterone | PTEN     | 26.373  |
| DH | Progesterone | POU4F1   | 26.373  |
| DH | Progesterone | MED1     | 26.373  |
| DH | Progesterone | MAP3K1   | 26.373  |
| DH | Progesterone | MAPK14   | 26.373  |
| DH | Progesterone | STAT5A   | 26.373  |
| DH | Progesterone | CDO1     | 26.373  |
| DH | Progesterone | SMAD3    | 26.373  |
| DH | Progesterone | MED17    | 26.373  |
| DH | Progesterone | STAT3    | 26.373  |
| DH | Progesterone | TBP      | 26.373  |
| DH | Progesterone | MMS19    | 26.373  |
| DH | Progesterone | PROX1    | 26.373  |
| DH | Progesterone | PTMA     | 26.373  |
| DH | Progesterone | BARX1    | 26.373  |
| DH | Progesterone | RBM23    | 26.373  |
| DH | Progesterone | SORBS1   | 26.373  |
| DH | Progesterone | PSMC5    | 26.373  |
| DH | Progesterone | THRA     | 26.373  |
| DH | Progesterone | HMGB1    | 26.373  |
| DH | Progesterone | NCOA6    | 26.373  |
| DH | Progesterone | NRIP1    | 26.373  |
| DH | Progesterone | RBBP5    | 26.373  |
| DH | Progesterone | DUT      | 26.373  |
| DH | Progesterone | ERBB2    | 26.373  |
| DH | Progesterone | SMARCD1  | 26.373  |
| DH | Progesterone | GNAI1    | 26.373  |
| DH | Progesterone | BATF3    | 26.373  |
| DH | Progesterone | MED6     | 26.373  |
| DH | Progesterone | JUND     | 26.373  |
| DH | Progesterone | MTA3     | 26.373  |

|    |              |          |        |
|----|--------------|----------|--------|
| DH | Progesterone | HSPA4    | 26.373 |
| DH | Progesterone | PHB2     | 26.373 |
| DH | Progesterone | MED10    | 26.373 |
| DH | Progesterone | FOXO3    | 26.373 |
| DH | Progesterone | BAG1     | 26.373 |
| DH | Progesterone | GNA15    | 26.373 |
| DH | Progesterone | NR2C1    | 26.373 |
| DH | Progesterone | CDK7     | 26.373 |
| DH | Progesterone | CRIPAK   | 26.373 |
| DH | Progesterone | MED13    | 26.373 |
| DH | Progesterone | CEBPB    | 26.373 |
| DH | Progesterone | MED14    | 26.373 |
| DH | Progesterone | CCNA2    | 26.373 |
| DH | Progesterone | KCNH7    | 26.373 |
| DH | Progesterone | APEX2    | 26.373 |
| DH | Progesterone | TRIM25   | 26.373 |
| DH | Progesterone | KCNMB3   | 26.373 |
| DH | Progesterone | ZNF398   | 26.373 |
| DH | Progesterone | BCAS2    | 26.373 |
| DH | Progesterone | HDAC1    | 23     |
| DH | Progesterone | ACTN3    | 22.373 |
| DH | Progesterone | DGKI     | 22.373 |
| DH | Progesterone | CTR9     | 22.373 |
| DH | Progesterone | TGFB1    | 22.373 |
| DH | Progesterone | SIX4     | 22.373 |
| DH | Progesterone | TAS1R1   | 22.373 |
| DH | Progesterone | EDN1     | 22.373 |
| DH | Progesterone | SLC26A6  | 22.373 |
| DH | Progesterone | CRP      | 22.373 |
| DH | Progesterone | TNF      | 22.373 |
| DH | Progesterone | SERPINB3 | 22.373 |
| DH | Progesterone | KCNB1    | 22.373 |
| DH | Progesterone | MAOB     | 22.373 |
| DH | Progesterone | SLC44A4  | 22.373 |
| DH | Progesterone | MCM3     | 22.373 |
| DH | Progesterone | 8-Mar    | 22.373 |
| DH | Progesterone | CHRNA3   | 22.373 |
| DH | Progesterone | STAP1    | 22.373 |
| DH | Progesterone | HIPK2    | 22.373 |
| DH | Progesterone | CSF2     | 22.373 |
| DH | Progesterone | KIT      | 22.373 |
| DH | Progesterone | ABCC4    | 22.373 |
| DH | Progesterone | CRH      | 22.373 |
| DH | Progesterone | AVPR2    | 22.373 |
| DH | Progesterone | UCN2     | 22.373 |
| DH | Progesterone | ATP2A1   | 22.373 |
| DH | Progesterone | AHCYL1   | 22.373 |
| DH | Progesterone | CASQ1    | 22.373 |
| DH | Progesterone | IDO1     | 22.373 |
| DH | Progesterone | TKT      | 22.373 |
| DH | Progesterone | CD34     | 22.373 |

|    |              |         |        |
|----|--------------|---------|--------|
| DH | Progesterone | CALHM1  | 22.373 |
| DH | Progesterone | HPRT1   | 22.373 |
| DH | Progesterone | TAL1    | 22.373 |
| DH | Progesterone | PDGFB   | 22.373 |
| DH | Progesterone | NEFH    | 22.373 |
| DH | Progesterone | TPM1    | 22.373 |
| DH | Progesterone | HCN2    | 22.373 |
| DH | Progesterone | ESR1    | 686    |
| DH | Progesterone | PDE7B   | 80.882 |
| DH | Progesterone | PDE3A   | 80.882 |
| DH | Progesterone | PIK3CD  | 80.882 |
| DH | Progesterone | PDE1A   | 80.882 |
| DH | Progesterone | PDE7A   | 80.882 |
| DH | Progesterone | PDE1C   | 80.882 |
| DH | Progesterone | ADORA1  | 80.882 |
| DH | Progesterone | PDE6C   | 80.882 |
| DH | Progesterone | PIK3R1  | 55.444 |
| DH | Progesterone | ADA     | 55.444 |
| DH | Progesterone | NR3C1   | 48     |
| DH | Progesterone | MVP     | 26.373 |
| DH | Progesterone | VAV3    | 26.373 |
| DH | Progesterone | PRMT2   | 26.373 |
| DH | Progesterone | NCOR2   | 26.373 |
| DH | Progesterone | USF1    | 26.373 |
| DH | Progesterone | MAPK1   | 26.373 |
| DH | Progesterone | KLF9    | 26.373 |
| DH | Progesterone | ACTG1   | 26.373 |
| DH | Progesterone | MED7    | 26.373 |
| DH | Progesterone | LCK     | 26.373 |
| DH | Progesterone | ESR2    | 26.373 |
| DH | Progesterone | JDP2    | 26.373 |
| DH | Progesterone | TP53    | 26.373 |
| DH | Progesterone | BAZ1B   | 26.373 |
| DH | Progesterone | CCNH    | 26.373 |
| DH | Progesterone | PPP5C   | 26.373 |
| DH | Progesterone | MPG     | 26.373 |
| DH | Progesterone | CHD9    | 26.373 |
| DH | Progesterone | PSMB9   | 26.373 |
| DH | Progesterone | POR     | 26.373 |
| DH | Progesterone | PIK3R3  | 26.373 |
| DH | Progesterone | NOS2    | 26.373 |
| DH | Progesterone | RFX4    | 26.373 |
| DH | Progesterone | GABARAP | 26.373 |
| DH | Progesterone | RLIM    | 26.373 |
| DH | Progesterone | SAFB    | 26.373 |
| DH | Progesterone | JUN     | 26.373 |
| DH | Progesterone | MED16   | 26.373 |
| DH | Progesterone | SMAD2   | 26.373 |
| DH | Progesterone | EIF3I   | 26.373 |
| DH | Progesterone | ARNT    | 26.373 |
| DH | Progesterone | YWHAQ   | 26.373 |

|    |              |           |        |
|----|--------------|-----------|--------|
| DH | Progesterone | COPS5     | 26.373 |
| DH | Progesterone | PPID      | 26.373 |
| DH | Progesterone | SMARCA2   | 26.373 |
| DH | Progesterone | UBR5      | 26.373 |
| DH | Progesterone | PTPN1     | 26.373 |
| DH | Progesterone | GADD45A   | 26.373 |
| DH | Progesterone | KCNN4     | 26.373 |
| DH | Progesterone | TRIM59    | 26.373 |
| DH | Progesterone | BDNF      | 26.373 |
| DH | Progesterone | NCOA2     | 26.373 |
| DH | Progesterone | KCNMB4    | 26.373 |
| DH | Progesterone | PTPN6     | 26.373 |
| DH | Progesterone | NOS3      | 26.373 |
| DH | Progesterone | CTNNB1    | 26.373 |
| DH | Progesterone | TIGD7     | 26.373 |
| DH | Progesterone | HSP90AA1  | 26.373 |
| DH | Progesterone | GADD45B   | 26.373 |
| DH | Progesterone | MED24     | 26.373 |
| DH | Progesterone | CALM3     | 26.373 |
| DH | Progesterone | GTF2H1    | 26.373 |
| DH | Progesterone | MKNK2     | 26.373 |
| DH | Progesterone | GABARAPL1 | 26.373 |
| DH | Progesterone | NR1H4     | 26.373 |
| DH | Progesterone | NCOA4     | 26.373 |
| DH | Progesterone | ATP5E     | 26.373 |
| DH | Progesterone | TFAP2C    | 22.373 |
| DH | Progesterone | NOS1AP    | 22.373 |
| DH | Progesterone | FKBP1A    | 22.373 |
| DH | Progesterone | G6PD      | 22.373 |
| DH | Progesterone | ATP11C    | 22.373 |
| DH | Progesterone | SIRT2     | 22.373 |
| DH | Progesterone | XRCC4     | 22.373 |
| DH | Progesterone | CACNA1A   | 22.373 |
| DH | Progesterone | ADRA2A    | 22.373 |
| DH | Progesterone | CETN1     | 22.373 |
| DH | Progesterone | NEDD4     | 22.373 |
| DH | Progesterone | FOXP3     | 22.373 |
| DH | Progesterone | LEF1      | 22.373 |
| DH | Progesterone | SORCS3    | 22.373 |
| DH | Progesterone | ADAP2     | 22.373 |
| DH | Progesterone | VCP       | 22.373 |
| DH | Progesterone | GAS6      | 22.373 |
| DH | Progesterone | TCF3      | 22.373 |
| DH | Progesterone | HRC       | 22.373 |
| DH | Progesterone | PPP3CA    | 22.373 |
| DH | Progesterone | TALDO1    | 22.373 |
| DH | Progesterone | INS       | 22.373 |
| DH | Progesterone | BNIP3     | 22.373 |
| DH | Progesterone | ZFP42     | 22.373 |
| DH | Progesterone | CAMK2D    | 22.373 |
| DH | Progesterone | ATP1A1    | 22.373 |



|    |              |          |        |
|----|--------------|----------|--------|
| DH | Progesterone | SMO      | 22.373 |
| DH | Progesterone | AQP1     | 22.373 |
| DH | Progesterone | FKBP1B   | 22.373 |
| DH | Progesterone | ATP2B4   | 22.373 |
| DH | Progesterone | DRD1     | 22.373 |
| DH | Progesterone | LTA      | 22.373 |
| DH | Progesterone | WNT5A    | 22.373 |
| DH | Progesterone | AMICA1   | 22.373 |
| DH | Progesterone | ALAD     | 22.373 |
| DH | Progesterone | RTN2     | 22.373 |
| DH | Progesterone | GLYR1    | 22.373 |
| DH | Progesterone | PIK3R5   | 22.373 |
| DH | Progesterone | RAG2     | 22.373 |
| DH | Progesterone | PGR      | 686    |
| DH | Progesterone | PDE5A    | 80.882 |
| DH | Progesterone | ADORA2A  | 80.882 |
| DH | Progesterone | PDE3B    | 80.882 |
| DH | Progesterone | PDE4D    | 80.882 |
| DH | Progesterone | ITPR3    | 80.882 |
| DH | Progesterone | ATM      | 80.882 |
| DH | Progesterone | CYP19A1  | 80.882 |
| DH | Progesterone | PDE11A   | 80.882 |
| DH | Progesterone | WNT4     | 55.444 |
| DH | Progesterone | HAP1     | 55.444 |
| DH | Progesterone | ANXA1    | 48     |
| DH | Progesterone | RELA     | 26.373 |
| DH | Progesterone | DDX5     | 26.373 |
| DH | Progesterone | XBP1     | 26.373 |
| DH | Progesterone | NFKB1    | 26.373 |
| DH | Progesterone | STUB1    | 26.373 |
| DH | Progesterone | SMARCD3  | 26.373 |
| DH | Progesterone | CDC25B   | 26.373 |
| DH | Progesterone | EP300    | 26.373 |
| DH | Progesterone | CYP21A2  | 26.373 |
| DH | Progesterone | CCNC     | 26.373 |
| DH | Progesterone | REXO4    | 26.373 |
| DH | Progesterone | CEBPA    | 26.373 |
| DH | Progesterone | SLC30A9  | 26.373 |
| DH | Progesterone | KDM5A    | 26.373 |
| DH | Progesterone | KCNH6    | 26.373 |
| DH | Progesterone | TUBB     | 26.373 |
| DH | Progesterone | CSNK2B   | 26.373 |
| DH | Progesterone | PELP1    | 26.373 |
| DH | Progesterone | HNF4A    | 26.373 |
| DH | Progesterone | ESRRA    | 26.373 |
| DH | Progesterone | AHR      | 26.373 |
| DH | Progesterone | POU2F2   | 26.373 |
| DH | Progesterone | UBE2I    | 26.373 |
| DH | Progesterone | PPARGC1B | 26.373 |
| DH | Progesterone | TSC2     | 26.373 |
| DH | Progesterone | MED21    | 26.373 |

|    |              |          |        |
|----|--------------|----------|--------|
| DH | Progesterone | SAFB2    | 26.373 |
| DH | Progesterone | SRC      | 26.373 |
| DH | Progesterone | UBE3A    | 26.373 |
| DH | Progesterone | FKBP5    | 26.373 |
| DH | Progesterone | TNFRSF14 | 26.373 |
| DH | Progesterone | RBM39    | 26.373 |
| DH | Progesterone | CCNE1    | 26.373 |
| DH | Progesterone | MED23    | 26.373 |
| DH | Progesterone | IGF1R    | 26.373 |
| DH | Progesterone | CAV1     | 26.373 |
| DH | Progesterone | JUNB     | 26.373 |
| DH | Progesterone | CYB5A    | 26.373 |
| DH | Progesterone | FLII     | 26.373 |
| DH | Progesterone | GTF2B    | 26.373 |
| DH | Progesterone | TADA3    | 26.373 |
| DH | Progesterone | KCNMB2   | 26.373 |
| DH | Progesterone | POLR1B   | 26.373 |
| DH | Progesterone | PTGES3   | 26.373 |
| DH | Progesterone | RARA     | 26.373 |
| DH | Progesterone | LDB1     | 26.373 |
| DH | Progesterone | XRCC6    | 26.373 |
| DH | Progesterone | RNF14    | 26.373 |
| DH | Progesterone | ATAD2    | 26.373 |
| DH | Progesterone | FOXO1    | 26.373 |
| DH | Progesterone | SMARCA4  | 26.373 |
| DH | Progesterone | PAK1     | 26.373 |
| DH | Progesterone | EGFR     | 26.373 |
| DH | Progesterone | WDR5     | 26.373 |
| DH | Progesterone | MGMT     | 26.373 |
| DH | Progesterone | TRIM24   | 26.373 |
| DH | Progesterone | AKT2     | 26.373 |
| DH | Progesterone | HMGA2    | 22.373 |
| DH | Progesterone | TAC1     | 22.373 |
| DH | Progesterone | FURIN    | 22.373 |
| DH | Progesterone | GNAT1    | 22.373 |
| DH | Progesterone | KHDRBS1  | 22.373 |
| DH | Progesterone | SPI1     | 22.373 |
| DH | Progesterone | NKX3-1   | 22.373 |
| DH | Progesterone | GNAT3    | 22.373 |
| DH | Progesterone | YWHAE    | 22.373 |
| DH | Progesterone | NUDT9    | 22.373 |
| DH | Progesterone | AGT      | 22.373 |
| DH | Progesterone | CXCL13   | 22.373 |
| DH | Progesterone | PTK2B    | 22.373 |
| DH | Progesterone | ADRB1    | 22.373 |
| DH | Progesterone | LRRC8A   | 22.373 |
| DH | Progesterone | GHRL     | 22.373 |
| DH | Progesterone | C5       | 22.373 |
| DH | Progesterone | LONP1    | 22.373 |
| DH | Progesterone | UTS2R    | 22.373 |
| DH | Progesterone | RAPGEF2  | 22.373 |

|    |              |          |        |
|----|--------------|----------|--------|
| DH | Progesterone | BDKRB2   | 22.373 |
| DH | Progesterone | MTOR     | 22.373 |
| DH | Progesterone | ZFPM1    | 22.373 |
| DH | Progesterone | PIK3R6   | 22.373 |
| DH | Progesterone | ADRA1B   | 22.373 |
| DH | Progesterone | RYR3     | 22.373 |
| DH | Progesterone | RAG1     | 22.373 |
| DH | Progesterone | TNFAIP3  | 22.373 |
| DH | Progesterone | CDC42    | 22.373 |
| DH | Progesterone | PGLS     | 22.373 |
| DH | Progesterone | ADAP1    | 22.373 |
| DH | Progesterone | SPR      | 22.373 |
| DH | Progesterone | SELP     | 22.373 |
| DH | Progesterone | TAS1R3   | 22.373 |
| DH | Progesterone | PAWR     | 22.373 |
| DH | Progesterone | CD63     | 22.373 |
| DH | Progesterone | VDR      | 22.373 |
| DH | Progesterone | PCSK6    | 22.373 |
| DH | Progesterone | NFX1     | 22.373 |
| DH | Progesterone | OPRK1    | 686    |
| DH | Progesterone | PDE9A    | 80.882 |
| DH | Progesterone | ITPR1    | 80.882 |
| DH | Progesterone | PGD      | 80.882 |
| DH | Progesterone | PIK3CB   | 80.882 |
| DH | Progesterone | POLA2    | 80.882 |
| DH | Progesterone | PDE6B    | 80.882 |
| DH | Progesterone | PDE8B    | 80.882 |
| DH | Progesterone | PDE8A    | 80.882 |
| DH | Progesterone | TACR2    | 55.444 |
| DH | Progesterone | IDNK     | 55.444 |
| DH | Progesterone | CREBBP   | 26.373 |
| DH | Progesterone | AKT1     | 26.373 |
| DH | Progesterone | KCNMB1   | 26.373 |
| DH | Progesterone | FHL1     | 26.373 |
| DH | Progesterone | ZBTB17   | 26.373 |
| DH | Progesterone | NR0B2    | 26.373 |
| DH | Progesterone | NELFB    | 26.373 |
| DH | Progesterone | RABAC1   | 26.373 |
| DH | Progesterone | KMT2D    | 26.373 |
| DH | Progesterone | NCOR1    | 26.373 |
| DH | Progesterone | CDK8     | 26.373 |
| DH | Progesterone | RPAIN    | 26.373 |
| DH | Progesterone | MTA2     | 26.373 |
| DH | Progesterone | ARHGEF15 | 26.373 |
| DH | Progesterone | KCNN2    | 26.373 |
| DH | Progesterone | NR0B1    | 26.373 |
| DH | Progesterone | PNRC2    | 26.373 |
| DH | Progesterone | CCND1    | 26.373 |
| DH | Progesterone | BCAR1    | 26.373 |
| DH | Progesterone | DHODH    | 26.373 |
| DH | Progesterone | STRN     | 26.373 |

|    |              |          |        |
|----|--------------|----------|--------|
| DH | Progesterone | PRMT1    | 26.373 |
| DH | Progesterone | MAPK3    | 26.373 |
| DH | Progesterone | CCNT1    | 26.373 |
| DH | Progesterone | TRAM1    | 26.373 |
| DH | Progesterone | MTA1     | 26.373 |
| DH | Progesterone | NR2C2    | 26.373 |
| DH | Progesterone | CUL4B    | 26.373 |
| DH | Progesterone | RNF4     | 26.373 |
| DH | Progesterone | HSP90AB1 | 26.373 |
| DH | Progesterone | SP1      | 26.373 |
| DH | Progesterone | SP3      | 26.373 |
| DH | Progesterone | HEXIM1   | 26.373 |
| DH | Progesterone | CDKN1A   | 26.373 |
| DH | Progesterone | GPRASP1  | 26.373 |
| DH | Progesterone | MDM2     | 26.373 |
| DH | Progesterone | ACTA1    | 26.373 |
| DH | Progesterone | SOS1     | 26.373 |
| DH | Progesterone | NR2F1    | 26.373 |
| DH | Progesterone | DRD3     | 26.373 |
| DH | Progesterone | TRRAP    | 26.373 |
| DH | Progesterone | RGS3     | 26.373 |
| DH | Progesterone | CUEDC2   | 26.373 |
| DH | Progesterone | PIAS2    | 26.373 |
| DH | Progesterone | FOXO4    | 26.373 |
| DH | Progesterone | NR2F6    | 26.373 |
| DH | Progesterone | PPP1CC   | 26.373 |
| DH | Progesterone | CALM2    | 26.373 |
| DH | Progesterone | SHC1     | 26.373 |
| DH | Progesterone | TCF20    | 26.373 |
| DH | Progesterone | KAT5     | 26.373 |
| DH | Progesterone | RXRA     | 26.373 |
| DH | Progesterone | POU4F2   | 26.373 |
| DH | Progesterone | KIF1A    | 26.373 |
| DH | Progesterone | SNW1     | 26.373 |
| DH | Progesterone | BTF3     | 26.373 |
| DH | Progesterone | RPS6KA3  | 26.373 |
| DH | Progesterone | DAP3     | 26.373 |
| DH | Progesterone | TNFSF11  | 22.373 |
| DH | Progesterone | PHB      | 22.373 |
| DH | Progesterone | TOX3     | 22.373 |
| DH | Progesterone | SIX1     | 22.373 |
| DH | Progesterone | PPP3CB   | 22.373 |
| DH | Progesterone | HOMER1   | 22.373 |
| DH | Progesterone | UBE2B    | 22.373 |
| DH | Progesterone | HELB     | 22.373 |
| DH | Progesterone | CETN2    | 22.373 |
| DH | Progesterone | PIK3CG   | 22.373 |
| DH | Progesterone | FER      | 22.373 |
| DH | Progesterone | ARID1A   | 22.373 |
| DH | Progesterone | LIG4     | 22.373 |
| DH | Progesterone | ADAM8    | 22.373 |

|    |              |          |        |
|----|--------------|----------|--------|
| DH | Progesterone | FGFR2    | 22.373 |
| DH | Progesterone | BCL11B   | 22.373 |
| DH | Progesterone | PLN      | 22.373 |
| DH | Progesterone | XCL1     | 22.373 |
| DH | Progesterone | SLC6A4   | 22.373 |
| DH | Progesterone | TET1     | 22.373 |
| DH | Progesterone | MMP28    | 22.373 |
| DH | Progesterone | WNT10B   | 22.373 |
| DH | Progesterone | GATA3    | 22.373 |
| DH | Progesterone | PF4      | 22.373 |
| DH | Progesterone | IL10     | 22.373 |
| DH | Progesterone | PPP3R1   | 22.373 |
| DH | Progesterone | RAB8B    | 22.373 |
| DH | Progesterone | TAC4     | 22.373 |
| DH | Progesterone | IL4      | 22.373 |
| DH | Progesterone | IGF2     | 22.373 |
| DH | Progesterone | EDA      | 22.373 |
| DH | Progesterone | GPER1    | 22.373 |
| DH | Progesterone | XRCC6BP1 | 22.373 |
| DH | Progesterone | NOS1     | 22.373 |
| DH | Progesterone | SOX9     | 22.373 |
| DH | Progesterone | CAMK2G   | 22.373 |
| DH | Progesterone | GNAS     | 22.373 |
| DH | Progesterone | REST     | 22.373 |
| DH | Progesterone | TAS1R2   | 22.373 |
| DH | Progesterone | NR3C2    | 686    |
| DH | Progesterone | PDE4A    | 80.882 |
| DH | Progesterone | PDE6A    | 80.882 |
| DH | Progesterone | PIK3CA   | 80.882 |
| DH | Progesterone | ITPR2    | 80.882 |
| DH | Progesterone | PDE4C    | 80.882 |
| DH | Progesterone | PDE4B    | 80.882 |
| DH | Progesterone | NT5E     | 80.882 |
| DH | Progesterone | RINT1    | 55.444 |
| DH | Progesterone | AMPD3    | 55.444 |
| DH | Progesterone | SRD5A1   | 48     |
| DH | Progesterone | MTCH2    | 26.373 |
| DH | Progesterone | PAGR1    | 26.373 |
| DH | Progesterone | KCNN1    | 26.373 |
| DH | Progesterone | ITGB3BP  | 26.373 |
| DH | Progesterone | ESRRG    | 26.373 |
| DH | Progesterone | MED20    | 26.373 |
| DH | Progesterone | HMGB2    | 26.373 |
| DH | Progesterone | PRDM2    | 26.373 |
| DH | Progesterone | NSD1     | 26.373 |
| DH | Progesterone | TRIM28   | 26.373 |
| DH | Progesterone | DDX17    | 26.373 |
| DH | Progesterone | CITED1   | 26.373 |
| DH | Progesterone | PDLIM1   | 26.373 |
| DH | Progesterone | OPRD1    | 26.373 |
| DH | Progesterone | WIP1     | 26.373 |

|    |              |          |        |
|----|--------------|----------|--------|
| DH | Progesterone | FHL2     | 26.373 |
| DH | Progesterone | GADD45G  | 26.373 |
| DH | Progesterone | TDG      | 26.373 |
| DH | Progesterone | FKBP4    | 26.373 |
| DH | Progesterone | UBC      | 26.373 |
| DH | Progesterone | SVIL     | 26.373 |
| DH | Progesterone | NCOA7    | 26.373 |
| DH | Progesterone | ZBTB16   | 26.373 |
| DH | Progesterone | GRIP1    | 26.373 |
| DH | Progesterone | RPS6KA1  | 26.373 |
| DH | Progesterone | SREBF1   | 26.373 |
| DH | Progesterone | DRD2     | 26.373 |
| DH | Progesterone | RBFOX2   | 26.373 |
| DH | Progesterone | PRPF6    | 26.373 |
| DH | Progesterone | POLR2D   | 26.373 |
| DH | Progesterone | NCOA3    | 26.373 |
| DH | Progesterone | TRIP4    | 26.373 |
| DH | Progesterone | MNAT1    | 26.373 |
| DH | Progesterone | KCNH2    | 26.373 |
| DH | Progesterone | POU2F1   | 26.373 |
| DH | Progesterone | TAP1     | 26.373 |
| DH | Progesterone | YWHAH    | 26.373 |
| DH | Progesterone | ASH2L    | 26.373 |
| DH | Progesterone | NCOA1    | 26.373 |
| DH | Progesterone | THRB     | 26.373 |
| DH | Progesterone | NPPA     | 26.373 |
| DH | Progesterone | CDK2     | 26.373 |
| DH | Progesterone | TUBA1B   | 26.373 |
| DH | Progesterone | ACSL1    | 26.373 |
| DH | Progesterone | CHUK     | 26.373 |
| DH | Progesterone | TAF10    | 26.373 |
| DH | Progesterone | SLC9A3R1 | 26.373 |
| DH | Progesterone | DDX54    | 26.373 |
| DH | Progesterone | KCNMA1   | 26.373 |
| DH | Progesterone | PIAS3    | 26.373 |
| DH | Progesterone | SMARCE1  | 26.373 |
| DH | Progesterone | CSNK2A1  | 26.373 |
| DH | Progesterone | AKAP13   | 26.373 |
| DH | Progesterone | KCNN3    | 26.373 |
| DH | Progesterone | DNTTIP2  | 26.373 |
| DH | Progesterone | CALM1    | 26.373 |
| DH | Progesterone | PRKACA   | 26.373 |
| DH | Progesterone | GRB2     | 26.373 |
| DH | Progesterone | NT5C1A   | 22.373 |
| DH | Progesterone | SIRT1    | 22.373 |
| DH | Progesterone | UTS2     | 22.373 |
| DH | Progesterone | QDPR     | 22.373 |
| DH | Progesterone | SYT2     | 22.373 |
| DH | Progesterone | SHANK3   | 22.373 |
| DH | Progesterone | HCN4     | 22.373 |
| DH | Progesterone | COMT     | 22.373 |

|    |                 |         |        |
|----|-----------------|---------|--------|
| DH | Progesterone    | POLA1   | 22.373 |
| DH | Progesterone    | BMP2    | 22.373 |
| DH | Progesterone    | SHH     | 22.373 |
| DH | Progesterone    | FGF10   | 22.373 |
| DH | Progesterone    | ADRBK1  | 22.373 |
| DH | Progesterone    | VT11A   | 22.373 |
| DH | Progesterone    | AURKA   | 22.373 |
| DH | Progesterone    | BCL2    | 22.373 |
| DH | Progesterone    | DNM3    | 22.373 |
| DH | Progesterone    | HIBADH  | 22.373 |
| DH | Progesterone    | HMGCR   | 22.373 |
| DH | Progesterone    | C2CD5   | 22.373 |
| DH | Progesterone    | HIF1A   | 22.373 |
| DH | Progesterone    | SLC18A3 | 22.373 |
| DH | Progesterone    | AREG    | 22.373 |
| DH | Progesterone    | ATP1A2  | 22.373 |
| DH | Progesterone    | NEFL    | 22.373 |
| DH | Progesterone    | SPX     | 22.373 |
| DH | Progesterone    | DKK3    | 22.373 |
| DH | Progesterone    | DPPA3   | 22.373 |
| DH | Progesterone    | POLB    | 22.373 |
| DH | Progesterone    | HPS4    | 22.373 |
| DH | Progesterone    | RYR2    | 22.373 |
| DH | Progesterone    | CBFA2T3 | 22.373 |
| DH | Progesterone    | PARP10  | 22.373 |
| DH | Progesterone    | TREM1   | 22.373 |
| DH | Progesterone    | BMP5    | 22.373 |
| DH | Progesterone    | LAMP2   | 22.373 |
| DH | Progesterone    | NCBP2   | 22.373 |
| DH | Progesterone    | CRHR2   | 22.373 |
| DH | Rhapontisterone | SRD5A1  | 48     |
| DH | Rhapontisterone | PGR     | 48     |
| DH | Rhapontisterone | PTGER2  | 48     |
| DH | Rhapontisterone | CYP17A1 | 48     |
| DH | Rhapontisterone | AR      | 48     |
| DH | Rhapontisterone | PTGER3  | 48     |
| DH | Rhapontisterone | ESR1    | 48     |
| DH | Rhapontisterone | NR3C1   | 48     |
| DH | Rhapontisterone | PTGFR   | 48     |
| DH | Rhapontisterone | PTGER1  | 48     |
| DH | Rhapontisterone | PTGIR   | 48     |
| DH | Rhapontisterone | ANXA1   | 48     |
| DH | Rhapontisterone | PTGER4  | 48     |
| DH | Rhapontisterone | OPRK1   | 48     |
| DH | Rhapontisterone | NR3C2   | 48     |
| DH | Serotonine      | SMPD1   | 373    |
| DH | Serotonine      | HTR6    | 373    |
| DH | Serotonine      | HRH1    | 373    |
| DH | Serotonine      | CHRM4   | 373    |
| DH | Serotonine      | TH      | 140.5  |
| DH | Serotonine      | DRD2    | 140.5  |

|    |            |          |         |
|----|------------|----------|---------|
| DH | Serotonine | HTR7     | 140.5   |
| DH | Serotonine | DRD3     | 140.5   |
| DH | Serotonine | ADRA2B   | 140.5   |
| DH | Serotonine | CHRN3    | 114.143 |
| DH | Serotonine | CHRNA7   | 114.143 |
| DH | Serotonine | CHRNA10  | 114.143 |
| DH | Serotonine | CHRNA6   | 114.143 |
| DH | Serotonine | CALM2    | 114.143 |
| DH | Serotonine | CALM3    | 114.143 |
| DH | Serotonine | EPX      | 114.143 |
| DH | Serotonine | PTGDR2   | 25.857  |
| DH | Serotonine | CACNA1H  | 25.857  |
| DH | Serotonine | SCN3B    | 25.857  |
| DH | Serotonine | CACNG2   | 25.857  |
| DH | Serotonine | GABRB1   | 25.857  |
| DH | Serotonine | KCNJ3    | 25.857  |
| DH | Serotonine | KCNH6    | 25.857  |
| DH | Serotonine | CACNA2D2 | 25.857  |
| DH | Serotonine | KCNJ6    | 25.857  |
| DH | Serotonine | PIK3R3   | 25.857  |
| DH | Serotonine | GABRR2   | 25.857  |
| DH | Serotonine | GABRG1   | 25.857  |
| DH | Serotonine | GRIA2    | 25.857  |
| DH | Serotonine | OPRK1    | 25.857  |
| DH | Serotonine | SCN9A    | 25.857  |
| DH | Serotonine | PTGR2    | 25.857  |
| DH | Serotonine | SCN4A    | 25.857  |
| DH | Serotonine | HRH2     | 25.857  |
| DH | Serotonine | PTGS2    | 25.857  |
| DH | Serotonine | GRIN3A   | 25.857  |
| DH | Serotonine | HTR3E    | 25.857  |
| DH | Serotonine | SCN8A    | 25.857  |
| DH | Serotonine | KCNQ2    | 25.857  |
| DH | Serotonine | GRIN2D   | 25.857  |
| DH | Serotonine | KCNH7    | 25.857  |
| DH | Serotonine | HDAC2    | 25.857  |
| DH | Serotonine | GLRA1    | 25.857  |
| DH | Serotonine | HTR2A    | 373     |
| DH | Serotonine | HTR2C    | 373     |
| DH | Serotonine | CALY     | 373     |
| DH | Serotonine | SLC6A3   | 140.5   |
| DH | Serotonine | ADRB1    | 140.5   |
| DH | Serotonine | PAH      | 140.5   |
| DH | Serotonine | HTR1A    | 140.5   |
| DH | Serotonine | DRD5     | 140.5   |
| DH | Serotonine | SLC6A2   | 140.5   |
| DH | Serotonine | NQO2     | 114.143 |
| DH | Serotonine | MTNR1B   | 114.143 |
| DH | Serotonine | CHRNA3   | 114.143 |
| DH | Serotonine | HTR1F    | 114.143 |
| DH | Serotonine | GSTP1    | 114.143 |



|    |            |          |         |
|----|------------|----------|---------|
| DH | Serotonine | CYP19A1  | 114.143 |
| DH | Serotonine | WARS2    | 48      |
| DH | Serotonine | CACNB1   | 25.857  |
| DH | Serotonine | HTR4     | 25.857  |
| DH | Serotonine | KCNQ3    | 25.857  |
| DH | Serotonine | GABRD    | 25.857  |
| DH | Serotonine | GRIA1    | 25.857  |
| DH | Serotonine | GABRG3   | 25.857  |
| DH | Serotonine | SCN7A    | 25.857  |
| DH | Serotonine | KCNA1    | 25.857  |
| DH | Serotonine | PPARG    | 25.857  |
| DH | Serotonine | ALDH5A1  | 25.857  |
| DH | Serotonine | SLC29A1  | 25.857  |
| DH | Serotonine | HRH3     | 25.857  |
| DH | Serotonine | GABRA4   | 25.857  |
| DH | Serotonine | GABRB2   | 25.857  |
| DH | Serotonine | CACNA1D  | 25.857  |
| DH | Serotonine | HTR3D    | 25.857  |
| DH | Serotonine | SCN4B    | 25.857  |
| DH | Serotonine | PTGS1    | 25.857  |
| DH | Serotonine | ADORA3   | 25.857  |
| DH | Serotonine | SLC22A8  | 25.857  |
| DH | Serotonine | GABRR3   | 25.857  |
| DH | Serotonine | GABRA1   | 25.857  |
| DH | Serotonine | CACNB2   | 25.857  |
| DH | Serotonine | ADORA1   | 25.857  |
| DH | Serotonine | TAAR1    | 25.857  |
| DH | Serotonine | SLC12A4  | 25.857  |
| DH | Serotonine | GRIN1    | 25.857  |
| DH | Serotonine | CHRM3    | 373     |
| DH | Serotonine | HTR1D    | 373     |
| DH | Serotonine | HTR1E    | 373     |
| DH | Serotonine | ADRA1A   | 140.5   |
| DH | Serotonine | TPH1     | 140.5   |
| DH | Serotonine | SLC6A4   | 140.5   |
| DH | Serotonine | ADRA1B   | 140.5   |
| DH | Serotonine | NOS3     | 140.5   |
| DH | Serotonine | CALR     | 114.143 |
| DH | Serotonine | MTNR1A   | 114.143 |
| DH | Serotonine | ASMT     | 114.143 |
| DH | Serotonine | CHRN2    | 114.143 |
| DH | Serotonine | IMPA2    | 114.143 |
| DH | Serotonine | CHAT     | 114.143 |
| DH | Serotonine | CHRNA5   | 114.143 |
| DH | Serotonine | WARS     | 48      |
| DH | Serotonine | CACNA2D1 | 25.857  |
| DH | Serotonine | HTR5A    | 25.857  |
| DH | Serotonine | SLC12A2  | 25.857  |
| DH | Serotonine | SLC12A7  | 25.857  |
| DH | Serotonine | ADORA2A  | 25.857  |
| DH | Serotonine | NTRK1    | 25.857  |

|    |            |         |         |
|----|------------|---------|---------|
| DH | Serotonine | VCAM1   | 25.857  |
| DH | Serotonine | GRIN2A  | 25.857  |
| DH | Serotonine | SCN10A  | 25.857  |
| DH | Serotonine | MAOB    | 25.857  |
| DH | Serotonine | CACNA1S | 25.857  |
| DH | Serotonine | GABRP   | 25.857  |
| DH | Serotonine | HDAC9   | 25.857  |
| DH | Serotonine | CACNA1B | 25.857  |
| DH | Serotonine | GABRR1  | 25.857  |
| DH | Serotonine | KCNH2   | 25.857  |
| DH | Serotonine | GABRQ   | 25.857  |
| DH | Serotonine | AOC3    | 25.857  |
| DH | Serotonine | GABRB3  | 25.857  |
| DH | Serotonine | HTR3B   | 25.857  |
| DH | Serotonine | ACADSB  | 25.857  |
| DH | Serotonine | TSPO    | 25.857  |
| DH | Serotonine | PIK3R2  | 25.857  |
| DH | Serotonine | ANXA1   | 25.857  |
| DH | Serotonine | NTRK2   | 25.857  |
| DH | Serotonine | GRIK2   | 25.857  |
| DH | Serotonine | CACNG1  | 25.857  |
| DH | Serotonine | CHRM1   | 373     |
| DH | Serotonine | CHRM5   | 373     |
| DH | Serotonine | HTR3A   | 373     |
| DH | Serotonine | ADRB2   | 140.5   |
| DH | Serotonine | SLC18A1 | 140.5   |
| DH | Serotonine | SLC18A2 | 140.5   |
| DH | Serotonine | ADRA2C  | 140.5   |
| DH | Serotonine | DRD1    | 140.5   |
| DH | Serotonine | TPH2    | 114.143 |
| DH | Serotonine | HTR2B   | 114.143 |
| DH | Serotonine | GSK3B   | 114.143 |
| DH | Serotonine | GRIN2B  | 114.143 |
| DH | Serotonine | GRIA3   | 114.143 |
| DH | Serotonine | CHRNA9  | 114.143 |
| DH | Serotonine | CHRNB4  | 114.143 |
| DH | Serotonine | SCN11A  | 25.857  |
| DH | Serotonine | GRIA4   | 25.857  |
| DH | Serotonine | ABAT    | 25.857  |
| DH | Serotonine | GABRA2  | 25.857  |
| DH | Serotonine | SLC12A5 | 25.857  |
| DH | Serotonine | SCN3A   | 25.857  |
| DH | Serotonine | OPRD1   | 25.857  |
| DH | Serotonine | GLO1    | 25.857  |
| DH | Serotonine | PTGIS   | 25.857  |
| DH | Serotonine | CALML3  | 25.857  |
| DH | Serotonine | SCN2A   | 25.857  |
| DH | Serotonine | ADORA2B | 25.857  |
| DH | Serotonine | NR3C1   | 25.857  |
| DH | Serotonine | P2RY12  | 25.857  |
| DH | Serotonine | CACNA1C | 25.857  |

|    |            |          |         |
|----|------------|----------|---------|
| DH | Serotonine | PANX1    | 25.857  |
| DH | Serotonine | GRIN2C   | 25.857  |
| DH | Serotonine | GPT      | 25.857  |
| DH | Serotonine | PGRMC1   | 25.857  |
| DH | Serotonine | KCND2    | 25.857  |
| DH | Serotonine | GABRA5   | 25.857  |
| DH | Serotonine | GABRA6   | 25.857  |
| DH | Serotonine | SCN1B    | 25.857  |
| DH | Serotonine | GABRG2   | 25.857  |
| DH | Serotonine | GABBR1   | 25.857  |
| DH | Serotonine | ORM2     | 25.857  |
| DH | Serotonine | KCND3    | 25.857  |
| DH | Serotonine | HTR1B    | 373     |
| DH | Serotonine | HRH4     | 373     |
| DH | Serotonine | CHRM2    | 373     |
| DH | Serotonine | ADRA2A   | 140.5   |
| DH | Serotonine | ADRA1D   | 140.5   |
| DH | Serotonine | DRD4     | 140.5   |
| DH | Serotonine | DBH      | 140.5   |
| DH | Serotonine | ADRB3    | 140.5   |
| DH | Serotonine | CHRNA4   | 114.143 |
| DH | Serotonine | ESR1     | 114.143 |
| DH | Serotonine | MPO      | 114.143 |
| DH | Serotonine | CHRNA2   | 114.143 |
| DH | Serotonine | IMPA1    | 114.143 |
| DH | Serotonine | CHRFAM7A | 114.143 |
| DH | Serotonine | CALM1    | 114.143 |
| DH | Serotonine | SCN2B    | 25.857  |
| DH | Serotonine | GPT2     | 25.857  |
| DH | Serotonine | SCN1A    | 25.857  |
| DH | Serotonine | MAPK1    | 25.857  |
| DH | Serotonine | PLA2G2A  | 25.857  |
| DH | Serotonine | GLRA2    | 25.857  |
| DH | Serotonine | SLC22A6  | 25.857  |
| DH | Serotonine | GRIN3B   | 25.857  |
| DH | Serotonine | SCN5A    | 25.857  |
| DH | Serotonine | GABRE    | 25.857  |
| DH | Serotonine | GABRA3   | 25.857  |
| DH | Serotonine | PIK3R1   | 25.857  |
| DH | Serotonine | SIGMAR1  | 25.857  |
| DH | Serotonine | PTGIR    | 25.857  |
| DH | Serotonine | MAOA     | 25.857  |
| DH | Serotonine | OPRM1    | 25.857  |
| DH | Serotonine | GABBR2   | 25.857  |
| DH | Serotonine | SLC12A6  | 25.857  |
| DH | Serotonine | ORM1     | 25.857  |
| DH | Serotonine | KCNJ5    | 25.857  |
| DH | Serotonine | SLC29A2  | 25.857  |
| DH | Serotonine | SLC12A1  | 25.857  |
| DH | Serotonine | SLC22A11 | 25.857  |
| DH | Serotonine | PPARA    | 25.857  |

|    |                 |         |        |
|----|-----------------|---------|--------|
| DH | Serotonine      | OGDH    | 25.857 |
| DH | Serotonine      | KCNJ9   | 25.857 |
| DH | Serotonine      | HTR3C   | 25.857 |
| DH | Physcion        | SOAT1   | 23     |
| DH | Physcion        | DRD2    | 22.373 |
| DH | Physcion        | MTTP    | 23     |
| DH | Physcion        | PAWR    | 22.373 |
| DH | Physcion        | CNR2    | 23     |
| DH | Physcion        | CNR1    | 23     |
| DH | Physcion        | SOAT2   | 23     |
| DH | Emodin          | ESR1    | 80.882 |
| DH | Emodin          | MED1    | 22.373 |
| DH | Emodin          | FGFR2   | 22.373 |
| DH | Emodin          | WNT5A   | 22.373 |
| DH | Emodin          | HSD17B1 | 23     |
| DH | Emodin          | NKX3-1  | 22.373 |
| DH | Emodin          | PGR     | 22.373 |
| DH | Emodin          | SOX9    | 22.373 |
| DH | Emodin          | TFAP2C  | 22.373 |
| DH | Emodin          | ESR2    | 22.373 |
| DH | Emodin          | WNT4    | 22.373 |
| DH | Emodin          | VDR     | 22.373 |
| DH | Emodin          | TOX3    | 22.373 |
| DH | Emodin          | SHH     | 22.373 |
| DH | Emodin          | AREG    | 22.373 |
| DH | Emodin          | TRIM24  | 22.373 |
| DH | Emodin          | TGFB1   | 22.373 |
| DH | Emodin          | LEF1    | 22.373 |
| DH | Emodin          | GPER1   | 22.373 |
| DH | Chrysophanol    | CFTR    | 80.882 |
| DH | Chrysophanol    | CA7     | 22.373 |
| DH | Chrysophanol    | CLN3    | 22.373 |
| DH | Chrysophanol    | SEC61B  | 22.373 |
| DH | Chrysophanol    | TCAF1   | 55.444 |
| DH | Chrysophanol    | DNAJC3  | 22.373 |
| DH | Chrysophanol    | TCAF2   | 22.373 |
| DH | Chrysophanol    | KCNE2   | 55.444 |
| DH | Chrysophanol    | ANO9    | 22.373 |
| DH | Chrysophanol    | SLC26A3 | 22.373 |
| DH | Chrysophanol    | HSD17B1 | 23     |
| DH | Chrysophanol    | SLC26A6 | 22.373 |
| DH | Chrysophanol    | SLC34A1 | 22.373 |
| DH | Chrysophanol    | NOX1    | 22.373 |
| DH | Chrysophanol    | FXYD1   | 22.373 |
| DH | Chrysophanol    | CA2     | 22.373 |
| DH | Palmidin A      | CHRM3   | 23     |
| DH | Palmidin A      | CHRM1   | 23     |
| DH | Palmidin A      | CHRM2   | 23     |
| DH | Palmidin A      | CHRM4   | 23     |
| DH | Emodin Anthrone | ESR1    | 80.882 |
| DH | Emodin Anthrone | MED1    | 22.373 |

|    |                 |          |        |
|----|-----------------|----------|--------|
| DH | Emodin Anthrone | FGFR2    | 22.373 |
| DH | Emodin Anthrone | WNT5A    | 22.373 |
| DH | Emodin Anthrone | HSD17B1  | 23     |
| DH | Emodin Anthrone | NKX3-1   | 22.373 |
| DH | Emodin Anthrone | PGR      | 22.373 |
| DH | Emodin Anthrone | SOX9     | 22.373 |
| DH | Emodin Anthrone | TFAP2C   | 22.373 |
| DH | Emodin Anthrone | ESR2     | 22.373 |
| DH | Emodin Anthrone | WNT4     | 22.373 |
| DH | Emodin Anthrone | VDR      | 22.373 |
| DH | Emodin Anthrone | TOX3     | 22.373 |
| DH | Emodin Anthrone | SHH      | 22.373 |
| DH | Emodin Anthrone | AREG     | 22.373 |
| DH | Emodin Anthrone | TRIM24   | 22.373 |
| DH | Emodin Anthrone | TGFB1    | 22.373 |
| DH | Emodin Anthrone | LEF1     | 22.373 |
| DH | Emodin Anthrone | GPER1    | 22.373 |
| DH | 2-Methyl Cardol | ADRA1A   | 80.882 |
| DH | 2-Methyl Cardol | ADRA1D   | 80.882 |
| DH | 2-Methyl Cardol | APLP1    | 55.444 |
| DH | 2-Methyl Cardol | TOX3     | 22.373 |
| DH | 2-Methyl Cardol | GSK3A    | 22.373 |
| DH | 2-Methyl Cardol | TRPV1    | 22.373 |
| DH | 2-Methyl Cardol | ADRB1    | 22.373 |
| DH | 2-Methyl Cardol | PPARGC1B | 22.373 |
| DH | 2-Methyl Cardol | DRD5     | 22.373 |
| DH | 2-Methyl Cardol | ADORA1   | 22.373 |
| DH | 2-Methyl Cardol | TRPM8    | 22.373 |
| DH | 2-Methyl Cardol | TRIM24   | 22.373 |
| DH | 2-Methyl Cardol | ESRRG    | 80.882 |
| DH | 2-Methyl Cardol | ADRA1B   | 80.882 |
| DH | 2-Methyl Cardol | CHRNA7   | 55.444 |
| DH | 2-Methyl Cardol | NAV2     | 22.373 |
| DH | 2-Methyl Cardol | NKX3-1   | 22.373 |
| DH | 2-Methyl Cardol | SHH      | 22.373 |
| DH | 2-Methyl Cardol | UCHL1    | 22.373 |
| DH | 2-Methyl Cardol | WNT4     | 22.373 |
| DH | 2-Methyl Cardol | ATP2B4   | 22.373 |
| DH | 2-Methyl Cardol | ADAM17   | 22.373 |
| DH | 2-Methyl Cardol | SOX9     | 22.373 |
| DH | 2-Methyl Cardol | TRPA1    | 22.373 |
| DH | 2-Methyl Cardol | ESR2     | 80.882 |
| DH | 2-Methyl Cardol | ADRA2C   | 80.882 |
| DH | 2-Methyl Cardol | INS      | 55.444 |
| DH | 2-Methyl Cardol | TGFB1    | 22.373 |
| DH | 2-Methyl Cardol | CETN2    | 22.373 |
| DH | 2-Methyl Cardol | LEF1     | 22.373 |
| DH | 2-Methyl Cardol | PDE4D    | 22.373 |
| DH | 2-Methyl Cardol | ARRB1    | 22.373 |
| DH | 2-Methyl Cardol | ARRDC3   | 22.373 |
| DH | 2-Methyl Cardol | ADRB3    | 22.373 |

|    |                              |         |        |
|----|------------------------------|---------|--------|
| DH | 2-Methyl Cardol              | VDR     | 22.373 |
| DH | 2-Methyl Cardol              | ADRA2A  | 80.882 |
| DH | 2-Methyl Cardol              | ADRA2B  | 80.882 |
| DH | 2-Methyl Cardol              | CALCA   | 55.444 |
| DH | 2-Methyl Cardol              | ADRB2   | 22.373 |
| DH | 2-Methyl Cardol              | NR0B1   | 22.373 |
| DH | 2-Methyl Cardol              | ADRBK1  | 22.373 |
| DH | 2-Methyl Cardol              | FGFR2   | 22.373 |
| DH | 2-Methyl Cardol              | NCOA3   | 22.373 |
| DH | 2-Methyl Cardol              | GPER1   | 22.373 |
| DH | 2-Methyl Cardol              | NOS1    | 22.373 |
| DH | 2-Methyl Cardol              | TPM1    | 22.373 |
| DH | 2-Methyl Cardol              | ESR1    | 80.882 |
| DH | 2-Methyl Cardol              | PHKG2   | 55.444 |
| DH | 2-Methyl Cardol              | TFAP2C  | 22.373 |
| DH | 2-Methyl Cardol              | MED1    | 22.373 |
| DH | 2-Methyl Cardol              | CETN1   | 22.373 |
| DH | 2-Methyl Cardol              | ARRB2   | 22.373 |
| DH | 2-Methyl Cardol              | PGR     | 22.373 |
| DH | 2-Methyl Cardol              | AREG    | 22.373 |
| DH | 2-Methyl Cardol              | WNT5A   | 22.373 |
| DH | 2-Methyl Cardol              | RGS2    | 22.373 |
| DH | 2-Methyl Cardol              | EDN2    | 22.373 |
| DH | Procyanidin B-5,3'-O-Gallate | SOAT1   | 48     |
| DH | Procyanidin B-5,3'-O-Gallate | MTTP    | 48     |
| DH | Procyanidin B-5,3'-O-Gallate | SOAT2   | 48     |
| HH | Carvacrol                    | GABRA2  | 80.882 |
| HH | Carvacrol                    | TNF     | 80.882 |
| HH | Carvacrol                    | GABRP   | 80.882 |
| HH | Carvacrol                    | GABRQ   | 80.882 |
| HH | Carvacrol                    | PDE4B   | 80.882 |
| HH | Carvacrol                    | COLQ    | 55.444 |
| HH | Carvacrol                    | SLC6A4  | 48     |
| HH | Carvacrol                    | DRD3    | 48     |
| HH | Carvacrol                    | SCN1A   | 23     |
| HH | Carvacrol                    | SLC5A7  | 22.373 |
| HH | Carvacrol                    | SIRT2   | 22.373 |
| HH | Carvacrol                    | HCN4    | 22.373 |
| HH | Carvacrol                    | NCKAP1L | 22.373 |
| HH | Carvacrol                    | EIF2AK1 | 22.373 |
| HH | Carvacrol                    | PRSS12  | 22.373 |
| HH | Carvacrol                    | FGFR2   | 22.373 |
| HH | Carvacrol                    | IL1RN   | 22.373 |
| HH | Carvacrol                    | IFNG    | 22.373 |
| HH | Carvacrol                    | ROCK2   | 22.373 |
| HH | Carvacrol                    | CAMK2D  | 22.373 |
| HH | Carvacrol                    | ROCK1   | 22.373 |
| HH | Carvacrol                    | BMP4    | 22.373 |
| HH | Carvacrol                    | AGRN    | 22.373 |
| HH | Carvacrol                    | PDE2A   | 22.373 |
| HH | Carvacrol                    | GRIN1   | 22.373 |

|    |           |         |        |
|----|-----------|---------|--------|
| HH | Carvacrol | GABRD   | 80.882 |
| HH | Carvacrol | GABRE   | 80.882 |
| HH | Carvacrol | GABRA4  | 80.882 |
| HH | Carvacrol | GABRB3  | 80.882 |
| HH | Carvacrol | BCHE    | 80.882 |
| HH | Carvacrol | LTA     | 55.444 |
| HH | Carvacrol | DRD4    | 48     |
| HH | Carvacrol | ALOX5   | 48     |
| HH | Carvacrol | SCN3A   | 23     |
| HH | Carvacrol | SEMA4D  | 22.373 |
| HH | Carvacrol | MIF     | 22.373 |
| HH | Carvacrol | FASLG   | 22.373 |
| HH | Carvacrol | CRP     | 22.373 |
| HH | Carvacrol | IL1B    | 22.373 |
| HH | Carvacrol | SLC44A4 | 22.373 |
| HH | Carvacrol | ANGPT1  | 22.373 |
| HH | Carvacrol | PLN     | 22.373 |
| HH | Carvacrol | HRC     | 22.373 |
| HH | Carvacrol | ADIRF   | 22.373 |
| HH | Carvacrol | IL10    | 22.373 |
| HH | Carvacrol | FNTA    | 22.373 |
| HH | Carvacrol | AHCY    | 22.373 |
| HH | Carvacrol | IKBKB   | 22.373 |
| HH | Carvacrol | CHDH    | 22.373 |
| HH | Carvacrol | HCN2    | 22.373 |
| HH | Carvacrol | PDE3A   | 80.882 |
| HH | Carvacrol | SCN2A   | 80.882 |
| HH | Carvacrol | GABRB2  | 80.882 |
| HH | Carvacrol | GABRA5  | 80.882 |
| HH | Carvacrol | GABRG2  | 80.882 |
| HH | Carvacrol | RXRA    | 55.444 |
| HH | Carvacrol | HTR7    | 48     |
| HH | Carvacrol | DRD5    | 48     |
| HH | Carvacrol | HMGA2   | 22.373 |
| HH | Carvacrol | NRG1    | 22.373 |
| HH | Carvacrol | DMGDH   | 22.373 |
| HH | Carvacrol | LGALS3  | 22.373 |
| HH | Carvacrol | TLR3    | 22.373 |
| HH | Carvacrol | SHH     | 22.373 |
| HH | Carvacrol | ADORA2B | 22.373 |
| HH | Carvacrol | AURKA   | 22.373 |
| HH | Carvacrol | DNM3    | 22.373 |
| HH | Carvacrol | TGFB2   | 22.373 |
| HH | Carvacrol | BDKRB2  | 22.373 |
| HH | Carvacrol | CDH8    | 22.373 |
| HH | Carvacrol | HPN     | 22.373 |
| HH | Carvacrol | APOA1   | 22.373 |
| HH | Carvacrol | IDO1    | 22.373 |
| HH | Carvacrol | SOX9    | 22.373 |
| HH | Carvacrol | GABRB1  | 80.882 |
| HH | Carvacrol | GABRA3  | 80.882 |

|    |                      |         |        |
|----|----------------------|---------|--------|
| HH | Carvacrol            | ACHE    | 80.882 |
| HH | Carvacrol            | GABRA6  | 80.882 |
| HH | Carvacrol            | PDE3B   | 55.444 |
| HH | Carvacrol            | SLC6A3  | 48     |
| HH | Carvacrol            | HTR1A   | 48     |
| HH | Carvacrol            | DRD1    | 48     |
| HH | Carvacrol            | PDE5A   | 22.373 |
| HH | Carvacrol            | CD74    | 22.373 |
| HH | Carvacrol            | NKX3-1  | 22.373 |
| HH | Carvacrol            | KLF4    | 22.373 |
| HH | Carvacrol            | EPO     | 22.373 |
| HH | Carvacrol            | RIPK1   | 22.373 |
| HH | Carvacrol            | ALDH7A1 | 22.373 |
| HH | Carvacrol            | WNT2    | 22.373 |
| HH | Carvacrol            | FCER2   | 22.373 |
| HH | Carvacrol            | RAPGEF2 | 22.373 |
| HH | Carvacrol            | ASCL1   | 22.373 |
| HH | Carvacrol            | NCOA1   | 22.373 |
| HH | Carvacrol            | KMT2A   | 22.373 |
| HH | Carvacrol            | ARHGEF2 | 22.373 |
| HH | Carvacrol            | CTNNB1  | 22.373 |
| HH | Carvacrol            | CAMK2G  | 22.373 |
| HH | Carvacrol            | GABRG3  | 80.882 |
| HH | Carvacrol            | GABRG1  | 80.882 |
| HH | Carvacrol            | SCN4A   | 80.882 |
| HH | Carvacrol            | GABRA1  | 80.882 |
| HH | Carvacrol            | PDE4D   | 55.444 |
| HH | Carvacrol            | DRD2    | 48     |
| HH | Carvacrol            | DBH     | 48     |
| HH | Carvacrol            | SLC6A2  | 48     |
| HH | Carvacrol            | APOA2   | 22.373 |
| HH | Carvacrol            | HPX     | 22.373 |
| HH | Carvacrol            | SIX3    | 22.373 |
| HH | Carvacrol            | LILRB1  | 22.373 |
| HH | Carvacrol            | MAP2K5  | 22.373 |
| HH | Carvacrol            | FGF10   | 22.373 |
| HH | Carvacrol            | FADD    | 22.373 |
| HH | Carvacrol            | YBX3    | 22.373 |
| HH | Carvacrol            | WNT2B   | 22.373 |
| HH | Carvacrol            | TIRAP   | 22.373 |
| HH | Carvacrol            | ENPP6   | 22.373 |
| HH | Carvacrol            | IL6     | 22.373 |
| HH | Carvacrol            | NOD2    | 22.373 |
| HH | Carvacrol            | IL4     | 22.373 |
| HH | Carvacrol            | CHKA    | 22.373 |
| HH | Carvacrol            | FAS     | 22.373 |
| HH | Dehydroshikimic Acid | PTGER1  | 48     |
| HH | Dehydroshikimic Acid | KIF14   | 22.373 |
| HH | Dehydroshikimic Acid | PTGER4  | 48     |
| HH | Dehydroshikimic Acid | PTGER2  | 48     |
| HH | Dehydroshikimic Acid | PTGER3  | 48     |



|    |                        |         |         |
|----|------------------------|---------|---------|
| HH | Dehydroshikimic Acid   | CD300A  | 22.373  |
| HH | 20-Hexadecanoylingenol | PRKCA   | 122.778 |
| HH | 20-Hexadecanoylingenol | CD300A  | 22.373  |
| HH | 20-Hexadecanoylingenol | PRKCD   | 122.778 |
| HH | 20-Hexadecanoylingenol | CHGA    | 22.373  |
| HH | 20-Hexadecanoylingenol | PTGER4  | 23      |
| HH | 20-Hexadecanoylingenol | APOC2   | 22.373  |
| HH | 20-Hexadecanoylingenol | PTGER2  | 23      |
| HH | 20-Hexadecanoylingenol | KIF14   | 22.373  |
| HH | 20-Hexadecanoylingenol | PTGER3  | 23      |
| HH | 20-Hexadecanoylingenol | PRKCB   | 22.373  |
| HH | Stearin                | NPR1    | 80.882  |
| HH | Stearin                | AR      | 48      |
| HH | Stearin                | NPR3    | 22.373  |
| HH | Stearin                | NPR2    | 22.373  |
| HH | 1-Hexadecene           | KCND1   | 80.882  |
| HH | 1-Hexadecene           | GAMT    | 80.882  |
| HH | 1-Hexadecene           | CAT     | 80.882  |
| HH | 1-Hexadecene           | KCNC1   | 80.882  |
| HH | 1-Hexadecene           | KCND2   | 80.882  |
| HH | 1-Hexadecene           | KCND3   | 80.882  |
| HH | 1-Hexadecene           | KCNQ1   | 55.444  |
| HH | 1-Hexadecene           | CYGB    | 22.373  |
| HH | 1-Hexadecene           | IGF1    | 22.373  |
| HH | 1-Hexadecene           | EDN1    | 22.373  |
| HH | 1-Hexadecene           | CNTNAP4 | 22.373  |
| HH | 1-Hexadecene           | GRIN2A  | 22.373  |
| HH | 1-Hexadecene           | SPARC   | 22.373  |
| HH | 1-Hexadecene           | CRLF1   | 22.373  |
| HH | 1-Hexadecene           | ALDH1B1 | 22.373  |
| HH | 1-Hexadecene           | DARS    | 22.373  |
| HH | 1-Hexadecene           | MIP     | 22.373  |
| HH | 1-Hexadecene           | STX1A   | 22.373  |
| HH | 1-Hexadecene           | NRXN2   | 22.373  |
| HH | 1-Hexadecene           | DAB2IP  | 22.373  |
| HH | 1-Hexadecene           | KCNA3   | 80.882  |
| HH | 1-Hexadecene           | KCNC3   | 80.882  |
| HH | 1-Hexadecene           | KCNB1   | 80.882  |
| HH | 1-Hexadecene           | ADH1C   | 80.882  |
| HH | 1-Hexadecene           | ALDH2   | 80.882  |
| HH | 1-Hexadecene           | GUCY1B3 | 55.444  |
| HH | 1-Hexadecene           | FBP1    | 22.373  |
| HH | 1-Hexadecene           | NRXN3   | 22.373  |
| HH | 1-Hexadecene           | SHANK3  | 22.373  |
| HH | 1-Hexadecene           | OXT     | 22.373  |
| HH | 1-Hexadecene           | RNASE4  | 22.373  |
| HH | 1-Hexadecene           | SLC17A7 | 22.373  |
| HH | 1-Hexadecene           | SORCS3  | 22.373  |
| HH | 1-Hexadecene           | FADD    | 22.373  |
| HH | 1-Hexadecene           | LEP     | 22.373  |
| HH | 1-Hexadecene           | ANK3    | 22.373  |

|    |              |         |        |
|----|--------------|---------|--------|
| HH | 1-Hexadecene | RYR3    | 22.373 |
| HH | 1-Hexadecene | PAXBP1  | 22.373 |
| HH | 1-Hexadecene | ADORA1  | 22.373 |
| HH | 1-Hexadecene | CYP2E1  | 22.373 |
| HH | 1-Hexadecene | PRKAB1  | 80.882 |
| HH | 1-Hexadecene | KCNA1   | 80.882 |
| HH | 1-Hexadecene | ADH1B   | 80.882 |
| HH | 1-Hexadecene | KCNB2   | 80.882 |
| HH | 1-Hexadecene | KCNA4   | 80.882 |
| HH | 1-Hexadecene | GATM    | 55.444 |
| HH | 1-Hexadecene | DGKI    | 22.373 |
| HH | 1-Hexadecene | LRRC4B  | 22.373 |
| HH | 1-Hexadecene | ACY3    | 22.373 |
| HH | 1-Hexadecene | MAGI2   | 22.373 |
| HH | 1-Hexadecene | RAB3A   | 22.373 |
| HH | 1-Hexadecene | CYP11A1 | 22.373 |
| HH | 1-Hexadecene | RNASE8  | 22.373 |
| HH | 1-Hexadecene | SNTG2   | 22.373 |
| HH | 1-Hexadecene | NLGN1   | 22.373 |
| HH | 1-Hexadecene | KCNE5   | 22.373 |
| HH | 1-Hexadecene | ZPR1    | 22.373 |
| HH | 1-Hexadecene | PAX7    | 22.373 |
| HH | 1-Hexadecene | ADH4    | 22.373 |
| HH | 1-Hexadecene | ACY1    | 22.373 |
| HH | 1-Hexadecene | ADH1A   | 80.882 |
| HH | 1-Hexadecene | KCNA2   | 80.882 |
| HH | 1-Hexadecene | DLG4    | 80.882 |
| HH | 1-Hexadecene | KCNA5   | 80.882 |
| HH | 1-Hexadecene | KCNA7   | 80.882 |
| HH | 1-Hexadecene | KCNK4   | 55.444 |
| HH | 1-Hexadecene | ADH7    | 22.373 |
| HH | 1-Hexadecene | AQP8    | 22.373 |
| HH | 1-Hexadecene | ASPA    | 22.373 |
| HH | 1-Hexadecene | APOE    | 22.373 |
| HH | 1-Hexadecene | MC4R    | 22.373 |
| HH | 1-Hexadecene | SCN5A   | 22.373 |
| HH | 1-Hexadecene | KCNIP2  | 22.373 |
| HH | 1-Hexadecene | SCGB1A1 | 22.373 |
| HH | 1-Hexadecene | CACNA1D | 22.373 |
| HH | 1-Hexadecene | PPARD   | 22.373 |
| HH | 1-Hexadecene | ALDH3B1 | 22.373 |
| HH | 1-Hexadecene | ALDH3B2 | 22.373 |
| HH | 1-Hexadecene | GJA5    | 22.373 |
| HH | 1-Hexadecene | KCNA10  | 80.882 |
| HH | 1-Hexadecene | TPO     | 80.882 |
| HH | 1-Hexadecene | KCNC2   | 80.882 |
| HH | 1-Hexadecene | RNASE1  | 80.882 |
| HH | 1-Hexadecene | KCNA6   | 80.882 |
| HH | 1-Hexadecene | IYD     | 55.444 |
| HH | 1-Hexadecene | NFIB    | 22.373 |
| HH | 1-Hexadecene | ARX     | 22.373 |

|    |                |         |        |
|----|----------------|---------|--------|
| HH | 1-Hexadecene   | NRXN1   | 22.373 |
| HH | 1-Hexadecene   | SOX15   | 22.373 |
| HH | 1-Hexadecene   | IL1B    | 22.373 |
| HH | 1-Hexadecene   | SCN10A  | 22.373 |
| HH | 1-Hexadecene   | GPX7    | 22.373 |
| HH | 1-Hexadecene   | OXTR    | 22.373 |
| HH | 1-Hexadecene   | RAPGEF2 | 22.373 |
| HH | 1-Hexadecene   | NKX2-1  | 22.373 |
| HH | 1-Hexadecene   | NPPA    | 22.373 |
| HH | 1-Hexadecene   | RNASE2  | 22.373 |
| HH | 1-Hexadecene   | FAS     | 22.373 |
| HH | Alpha-Onocerin | VDR     | 80.882 |
| HH | Alpha-Onocerin | ESR1    | 48     |
| HH | Alpha-Onocerin | NFKB1   | 22.373 |
| HH | Alpha-Onocerin | MED1    | 22.373 |
| HH | Alpha-Onocerin | GF11    | 22.373 |
| HH | Alpha-Onocerin | KL      | 22.373 |
| HH | Alpha-Onocerin | CYP27A1 | 22.373 |
| HH | Alpha-Onocerin | TRIM24  | 22.373 |
| HH | Alpha-Onocerin | CYP27B1 | 80.882 |
| HH | Alpha-Onocerin | PGR     | 48     |
| HH | Alpha-Onocerin | AKR1C3  | 22.373 |
| HH | Alpha-Onocerin | SNAI1   | 22.373 |
| HH | Alpha-Onocerin | LANCL2  | 22.373 |
| HH | Alpha-Onocerin | CYP2R1  | 22.373 |
| HH | Alpha-Onocerin | KANK2   | 22.373 |
| HH | Alpha-Onocerin | GC      | 55.444 |
| HH | Alpha-Onocerin | OPRK1   | 48     |
| HH | Alpha-Onocerin | CYP24A1 | 22.373 |
| HH | Alpha-Onocerin | CYP3A4  | 22.373 |
| HH | Alpha-Onocerin | WNT4    | 22.373 |
| HH | Alpha-Onocerin | PML     | 22.373 |
| HH | Alpha-Onocerin | IRX5    | 22.373 |
| HH | Alpha-Onocerin | SNW1    | 55.444 |
| HH | Alpha-Onocerin | TRPM8   | 48     |
| HH | Alpha-Onocerin | GPBAR1  | 22.373 |
| HH | Alpha-Onocerin | CALB1   | 22.373 |
| HH | Alpha-Onocerin | TCF3    | 22.373 |
| HH | Alpha-Onocerin | B4GALT1 | 22.373 |
| HH | Alpha-Onocerin | RXRA    | 22.373 |
| HH | Alpha-Onocerin | TRPV3   | 48     |
| HH | Alpha-Onocerin | TRPA1   | 48     |
| HH | Alpha-Onocerin | SNAI2   | 22.373 |
| HH | Alpha-Onocerin | FGF23   | 22.373 |
| HH | Alpha-Onocerin | BAX     | 22.373 |
| HH | Alpha-Onocerin | S100G   | 22.373 |
| HH | Alpha-Onocerin | NR1H4   | 22.373 |
| HH | 1-Heptadecene  | KCND1   | 80.882 |
| HH | 1-Heptadecene  | GAMT    | 80.882 |
| HH | 1-Heptadecene  | CAT     | 80.882 |
| HH | 1-Heptadecene  | KCNC1   | 80.882 |

|    |               |         |        |
|----|---------------|---------|--------|
| HH | 1-Heptadecene | KCND2   | 80.882 |
| HH | 1-Heptadecene | KCND3   | 80.882 |
| HH | 1-Heptadecene | KCNQ1   | 55.444 |
| HH | 1-Heptadecene | CYGB    | 22.373 |
| HH | 1-Heptadecene | IGF1    | 22.373 |
| HH | 1-Heptadecene | EDN1    | 22.373 |
| HH | 1-Heptadecene | CNTNAP4 | 22.373 |
| HH | 1-Heptadecene | GRIN2A  | 22.373 |
| HH | 1-Heptadecene | SPARC   | 22.373 |
| HH | 1-Heptadecene | CRLF1   | 22.373 |
| HH | 1-Heptadecene | ALDH1B1 | 22.373 |
| HH | 1-Heptadecene | DARS    | 22.373 |
| HH | 1-Heptadecene | MIP     | 22.373 |
| HH | 1-Heptadecene | STX1A   | 22.373 |
| HH | 1-Heptadecene | NRXN2   | 22.373 |
| HH | 1-Heptadecene | DAB2IP  | 22.373 |
| HH | 1-Heptadecene | KCNA3   | 80.882 |
| HH | 1-Heptadecene | KCNC3   | 80.882 |
| HH | 1-Heptadecene | KCNB1   | 80.882 |
| HH | 1-Heptadecene | ADH1C   | 80.882 |
| HH | 1-Heptadecene | ALDH2   | 80.882 |
| HH | 1-Heptadecene | GUCY1B3 | 55.444 |
| HH | 1-Heptadecene | FBP1    | 22.373 |
| HH | 1-Heptadecene | NRXN3   | 22.373 |
| HH | 1-Heptadecene | SHANK3  | 22.373 |
| HH | 1-Heptadecene | OXT     | 22.373 |
| HH | 1-Heptadecene | RNASE4  | 22.373 |
| HH | 1-Heptadecene | SLC17A7 | 22.373 |
| HH | 1-Heptadecene | SORCS3  | 22.373 |
| HH | 1-Heptadecene | FADD    | 22.373 |
| HH | 1-Heptadecene | LEP     | 22.373 |
| HH | 1-Heptadecene | ANK3    | 22.373 |
| HH | 1-Heptadecene | RYR3    | 22.373 |
| HH | 1-Heptadecene | PAXBP1  | 22.373 |
| HH | 1-Heptadecene | ADORA1  | 22.373 |
| HH | 1-Heptadecene | CYP2E1  | 22.373 |
| HH | 1-Heptadecene | PRKAB1  | 80.882 |
| HH | 1-Heptadecene | KCNA1   | 80.882 |
| HH | 1-Heptadecene | ADH1B   | 80.882 |
| HH | 1-Heptadecene | KCNB2   | 80.882 |
| HH | 1-Heptadecene | KCNA4   | 80.882 |
| HH | 1-Heptadecene | GATM    | 55.444 |
| HH | 1-Heptadecene | DGKI    | 22.373 |
| HH | 1-Heptadecene | LRRC4B  | 22.373 |
| HH | 1-Heptadecene | ACY3    | 22.373 |
| HH | 1-Heptadecene | MAGI2   | 22.373 |
| HH | 1-Heptadecene | RAB3A   | 22.373 |
| HH | 1-Heptadecene | CYP11A1 | 22.373 |
| HH | 1-Heptadecene | RNASE8  | 22.373 |
| HH | 1-Heptadecene | SNTG2   | 22.373 |
| HH | 1-Heptadecene | NLGN1   | 22.373 |

|    |                  |         |        |
|----|------------------|---------|--------|
| HH | 1-Heptadecene    | KCNE5   | 22.373 |
| HH | 1-Heptadecene    | ZPR1    | 22.373 |
| HH | 1-Heptadecene    | PAX7    | 22.373 |
| HH | 1-Heptadecene    | ADH4    | 22.373 |
| HH | 1-Heptadecene    | ACY1    | 22.373 |
| HH | 1-Heptadecene    | ADH1A   | 80.882 |
| HH | 1-Heptadecene    | KCNA2   | 80.882 |
| HH | 1-Heptadecene    | DLG4    | 80.882 |
| HH | 1-Heptadecene    | KCNA5   | 80.882 |
| HH | 1-Heptadecene    | KCNA7   | 80.882 |
| HH | 1-Heptadecene    | KCNK4   | 55.444 |
| HH | 1-Heptadecene    | ADH7    | 22.373 |
| HH | 1-Heptadecene    | AQP8    | 22.373 |
| HH | 1-Heptadecene    | ASPA    | 22.373 |
| HH | 1-Heptadecene    | APOE    | 22.373 |
| HH | 1-Heptadecene    | MC4R    | 22.373 |
| HH | 1-Heptadecene    | SCN5A   | 22.373 |
| HH | 1-Heptadecene    | KCNIP2  | 22.373 |
| HH | 1-Heptadecene    | SCGB1A1 | 22.373 |
| HH | 1-Heptadecene    | CACNA1D | 22.373 |
| HH | 1-Heptadecene    | PPARD   | 22.373 |
| HH | 1-Heptadecene    | ALDH3B1 | 22.373 |
| HH | 1-Heptadecene    | ALDH3B2 | 22.373 |
| HH | 1-Heptadecene    | GJA5    | 22.373 |
| HH | 1-Heptadecene    | KCNA10  | 80.882 |
| HH | 1-Heptadecene    | TPO     | 80.882 |
| HH | 1-Heptadecene    | KCNC2   | 80.882 |
| HH | 1-Heptadecene    | RNASE1  | 80.882 |
| HH | 1-Heptadecene    | KCNA6   | 80.882 |
| HH | 1-Heptadecene    | IYD     | 55.444 |
| HH | 1-Heptadecene    | NFIB    | 22.373 |
| HH | 1-Heptadecene    | ARX     | 22.373 |
| HH | 1-Heptadecene    | NRXN1   | 22.373 |
| HH | 1-Heptadecene    | SOX15   | 22.373 |
| HH | 1-Heptadecene    | IL1B    | 22.373 |
| HH | 1-Heptadecene    | SCN10A  | 22.373 |
| HH | 1-Heptadecene    | GPX7    | 22.373 |
| HH | 1-Heptadecene    | OXTR    | 22.373 |
| HH | 1-Heptadecene    | RAPGEF2 | 22.373 |
| HH | 1-Heptadecene    | NKX2-1  | 22.373 |
| HH | 1-Heptadecene    | NPPA    | 22.373 |
| HH | 1-Heptadecene    | RNASE2  | 22.373 |
| HH | 1-Heptadecene    | FAS     | 22.373 |
| HH | Linoleyl Acetate | SLC8A1  | 48     |
| HH | Linoleyl Acetate | FADS2   | 48     |
| HH | Linoleyl Acetate | CYP19A1 | 48     |
| HH | Linoleyl Acetate | ESR1    | 48     |
| HH | Linoleyl Acetate | FADS1   | 48     |
| HH | Linoleyl Acetate | NR3C2   | 48     |
| HH | Linoleyl Acetate | TRPV1   | 48     |
| HH | Linoleyl Acetate | PTGS1   | 48     |

|    |                  |         |        |
|----|------------------|---------|--------|
| HH | Linoleyl Acetate | PGR     | 48     |
| HH | Linoleyl Acetate | PTGS2   | 48     |
| HH | Linoleyl Acetate | AR      | 48     |
| HH | Linoleyl Acetate | ELOVL4  | 48     |
| HH | Safranal         | ACHE    | 80.882 |
| HH | Safranal         | SLC5A7  | 22.373 |
| HH | Safranal         | PRSS12  | 22.373 |
| HH | Safranal         | ENPP6   | 22.373 |
| HH | Safranal         | CHDH    | 22.373 |
| HH | Safranal         | BCHE    | 80.882 |
| HH | Safranal         | NRG1    | 22.373 |
| HH | Safranal         | SLC44A4 | 22.373 |
| HH | Safranal         | CDH8    | 22.373 |
| HH | Safranal         | GRIN1   | 22.373 |
| HH | Safranal         | COLQ    | 55.444 |
| HH | Safranal         | DMGDH   | 22.373 |
| HH | Safranal         | ALDH7A1 | 22.373 |
| HH | Safranal         | FNTA    | 22.373 |
| HH | Safranal         | PGR     | 48     |
| HH | Safranal         | SIX3    | 22.373 |
| HH | Safranal         | DNM3    | 22.373 |
| HH | Safranal         | AGRN    | 22.373 |
| HH | Safranal         | CYP19A1 | 48     |
| HH | Safranal         | CRP     | 22.373 |
| HH | Safranal         | ASCL1   | 22.373 |
| HH | Safranal         | CHKA    | 22.373 |
| HH | Sagittariol      | ESR1    | 48     |
| HH | Sagittariol      | PGR     | 48     |
| HH | Sagittariol      | NR3C1   | 48     |
| HH | Neocembrene      | KCND1   | 80.882 |
| HH | Neocembrene      | GAMT    | 80.882 |
| HH | Neocembrene      | CAT     | 80.882 |
| HH | Neocembrene      | KCNC1   | 80.882 |
| HH | Neocembrene      | KCND2   | 80.882 |
| HH | Neocembrene      | KCND3   | 80.882 |
| HH | Neocembrene      | KCNQ1   | 55.444 |
| HH | Neocembrene      | CYGB    | 22.373 |
| HH | Neocembrene      | IGF1    | 22.373 |
| HH | Neocembrene      | EDN1    | 22.373 |
| HH | Neocembrene      | CNTNAP4 | 22.373 |
| HH | Neocembrene      | GRIN2A  | 22.373 |
| HH | Neocembrene      | SPARC   | 22.373 |
| HH | Neocembrene      | CRLF1   | 22.373 |
| HH | Neocembrene      | ALDH1B1 | 22.373 |
| HH | Neocembrene      | DARS    | 22.373 |
| HH | Neocembrene      | MIP     | 22.373 |
| HH | Neocembrene      | STX1A   | 22.373 |
| HH | Neocembrene      | NRXN2   | 22.373 |
| HH | Neocembrene      | DAB2IP  | 22.373 |
| HH | Neocembrene      | KCNA3   | 80.882 |
| HH | Neocembrene      | KCNC3   | 80.882 |

|    |             |         |        |
|----|-------------|---------|--------|
| HH | Neocembrene | KCNB1   | 80.882 |
| HH | Neocembrene | ADH1C   | 80.882 |
| HH | Neocembrene | ALDH2   | 80.882 |
| HH | Neocembrene | GUCY1B3 | 55.444 |
| HH | Neocembrene | FBP1    | 22.373 |
| HH | Neocembrene | NRXN3   | 22.373 |
| HH | Neocembrene | SHANK3  | 22.373 |
| HH | Neocembrene | OXT     | 22.373 |
| HH | Neocembrene | RNASE4  | 22.373 |
| HH | Neocembrene | SLC17A7 | 22.373 |
| HH | Neocembrene | SORCS3  | 22.373 |
| HH | Neocembrene | FADD    | 22.373 |
| HH | Neocembrene | LEP     | 22.373 |
| HH | Neocembrene | ANK3    | 22.373 |
| HH | Neocembrene | RYR3    | 22.373 |
| HH | Neocembrene | PAXBP1  | 22.373 |
| HH | Neocembrene | ADORA1  | 22.373 |
| HH | Neocembrene | CYP2E1  | 22.373 |
| HH | Neocembrene | PRKAB1  | 80.882 |
| HH | Neocembrene | KCNA1   | 80.882 |
| HH | Neocembrene | ADH1B   | 80.882 |
| HH | Neocembrene | KCNB2   | 80.882 |
| HH | Neocembrene | KCNA4   | 80.882 |
| HH | Neocembrene | GATM    | 55.444 |
| HH | Neocembrene | DGKI    | 22.373 |
| HH | Neocembrene | LRRC4B  | 22.373 |
| HH | Neocembrene | ACY3    | 22.373 |
| HH | Neocembrene | MAGI2   | 22.373 |
| HH | Neocembrene | RAB3A   | 22.373 |
| HH | Neocembrene | CYP11A1 | 22.373 |
| HH | Neocembrene | RNASE8  | 22.373 |
| HH | Neocembrene | SNTG2   | 22.373 |
| HH | Neocembrene | NLGN1   | 22.373 |
| HH | Neocembrene | KCNE5   | 22.373 |
| HH | Neocembrene | ZPR1    | 22.373 |
| HH | Neocembrene | PAX7    | 22.373 |
| HH | Neocembrene | ADH4    | 22.373 |
| HH | Neocembrene | ACY1    | 22.373 |
| HH | Neocembrene | ADH1A   | 80.882 |
| HH | Neocembrene | KCNA2   | 80.882 |
| HH | Neocembrene | DLG4    | 80.882 |
| HH | Neocembrene | KCNA5   | 80.882 |
| HH | Neocembrene | KCNA7   | 80.882 |
| HH | Neocembrene | KCNK4   | 55.444 |
| HH | Neocembrene | ADH7    | 22.373 |
| HH | Neocembrene | AQP8    | 22.373 |
| HH | Neocembrene | ASPA    | 22.373 |
| HH | Neocembrene | APOE    | 22.373 |
| HH | Neocembrene | MC4R    | 22.373 |
| HH | Neocembrene | SCN5A   | 22.373 |
| HH | Neocembrene | KCNIP2  | 22.373 |

|    |             |         |         |
|----|-------------|---------|---------|
| HH | Neocembrene | SCGB1A1 | 22.373  |
| HH | Neocembrene | CACNA1D | 22.373  |
| HH | Neocembrene | PPARD   | 22.373  |
| HH | Neocembrene | ALDH3B1 | 22.373  |
| HH | Neocembrene | ALDH3B2 | 22.373  |
| HH | Neocembrene | GJA5    | 22.373  |
| HH | Neocembrene | KCNA10  | 80.882  |
| HH | Neocembrene | TPO     | 80.882  |
| HH | Neocembrene | KCNC2   | 80.882  |
| HH | Neocembrene | RNASE1  | 80.882  |
| HH | Neocembrene | KCNA6   | 80.882  |
| HH | Neocembrene | IYD     | 55.444  |
| HH | Neocembrene | NFIB    | 22.373  |
| HH | Neocembrene | ARX     | 22.373  |
| HH | Neocembrene | NRXN1   | 22.373  |
| HH | Neocembrene | SOX15   | 22.373  |
| HH | Neocembrene | IL1B    | 22.373  |
| HH | Neocembrene | SCN10A  | 22.373  |
| HH | Neocembrene | GPX7    | 22.373  |
| HH | Neocembrene | OXTR    | 22.373  |
| HH | Neocembrene | RAPGEF2 | 22.373  |
| HH | Neocembrene | NKX2-1  | 22.373  |
| HH | Neocembrene | NPPA    | 22.373  |
| HH | Neocembrene | RNASE2  | 22.373  |
| HH | Neocembrene | FAS     | 22.373  |
| HH | Clerosterol | ESR1    | 122.778 |
| HH | Clerosterol | SNW1    | 55.444  |
| HH | Clerosterol | CYP24A1 | 22.373  |
| HH | Clerosterol | CYP3A4  | 22.373  |
| HH | Clerosterol | WNT4    | 22.373  |
| HH | Clerosterol | PML     | 22.373  |
| HH | Clerosterol | IRX5    | 22.373  |
| HH | Clerosterol | PGR     | 122.778 |
| HH | Clerosterol | AR      | 48      |
| HH | Clerosterol | GPBAR1  | 22.373  |
| HH | Clerosterol | CALB1   | 22.373  |
| HH | Clerosterol | TCF3    | 22.373  |
| HH | Clerosterol | B4GALT1 | 22.373  |
| HH | Clerosterol | RXRA    | 22.373  |
| HH | Clerosterol | VDR     | 80.882  |
| HH | Clerosterol | NR3C1   | 48      |
| HH | Clerosterol | SNAI2   | 22.373  |
| HH | Clerosterol | FGF23   | 22.373  |
| HH | Clerosterol | BAX     | 22.373  |
| HH | Clerosterol | S100G   | 22.373  |
| HH | Clerosterol | NR1H4   | 22.373  |
| HH | Clerosterol | CYP27B1 | 80.882  |
| HH | Clerosterol | NFKB1   | 22.373  |
| HH | Clerosterol | MED1    | 22.373  |
| HH | Clerosterol | GF11    | 22.373  |
| HH | Clerosterol | KL      | 22.373  |



|    |             |         |        |
|----|-------------|---------|--------|
| HH | Clerosterol | CYP27A1 | 22.373 |
| HH | Clerosterol | TRIM24  | 22.373 |
| HH | Clerosterol | GC      | 55.444 |
| HH | Clerosterol | AKR1C3  | 22.373 |
| HH | Clerosterol | SNAI1   | 22.373 |
| HH | Clerosterol | LANCL2  | 22.373 |
| HH | Clerosterol | CYP2R1  | 22.373 |
| HH | Clerosterol | KANK2   | 22.373 |
| HH | 3-Hexanol   | TRPV3   | 80.882 |
| HH | 3-Hexanol   | ACTN3   | 22.373 |
| HH | 3-Hexanol   | FGF10   | 22.373 |
| HH | 3-Hexanol   | NEFL    | 22.373 |
| HH | 3-Hexanol   | TAC4    | 22.373 |
| HH | 3-Hexanol   | OPRK1   | 80.882 |
| HH | 3-Hexanol   | TAC1    | 22.373 |
| HH | 3-Hexanol   | VCP     | 22.373 |
| HH | 3-Hexanol   | UCN2    | 22.373 |
| HH | 3-Hexanol   | CDH3    | 22.373 |
| HH | 3-Hexanol   | TRPM8   | 80.882 |
| HH | 3-Hexanol   | NGFR    | 22.373 |
| HH | 3-Hexanol   | HIF1A   | 22.373 |
| HH | 3-Hexanol   | SMO     | 22.373 |
| HH | 3-Hexanol   | CBFA2T3 | 22.373 |
| HH | 3-Hexanol   | TRPA1   | 80.882 |
| HH | 3-Hexanol   | ADRA2A  | 22.373 |
| HH | 3-Hexanol   | BNIP3   | 22.373 |
| HH | 3-Hexanol   | TACR2   | 22.373 |
| HH | 3-Hexanol   | NEFH    | 22.373 |
| HH | 3-Hexanol   | KCNK4   | 55.444 |
| HH | 3-Hexanol   | TRPV1   | 22.373 |
| HH | 3-Hexanol   | CRH     | 22.373 |
| HH | 3-Hexanol   | AQP1    | 22.373 |
| HH | 3-Hexanol   | CRHR2   | 22.373 |
| HH | Kaempferol  | HSD17B1 | 26.373 |
| HH | Kaempferol  | CRYZ    | 23     |
| HH | Kaempferol  | VKORC1  | 23     |
| HH | Kaempferol  | NQO1    | 23     |
| HH | Quercetin   | HTR2A   | 26.373 |
| HH | Quercetin   | HTR1D   | 26.373 |
| HH | Quercetin   | CALY    | 26.373 |
| HH | Quercetin   | HTR2B   | 26.373 |
| HH | Quercetin   | DRD2    | 26.373 |
| HH | Quercetin   | DRD3    | 26.373 |
| HH | Quercetin   | ADRA2A  | 26.373 |
| HH | Quercetin   | DRD4    | 26.373 |
| HH | Quercetin   | DRD5    | 26.373 |
| HH | Quercetin   | HTR1B   | 26.373 |
| HH | Quercetin   | HTR1A   | 26.373 |
| HH | Quercetin   | DRD1    | 26.373 |
| HH | Quercetin   | HTR2C   | 26.373 |
| HH | Quercetin   | ADRA2C  | 26.373 |

|    |                  |         |         |
|----|------------------|---------|---------|
| HH | Quercetin        | ADRA2B  | 26.373  |
| HH | 2-Hexanol        | TRPV3   | 80.882  |
| HH | 2-Hexanol        | ACTN3   | 22.373  |
| HH | 2-Hexanol        | FGF10   | 22.373  |
| HH | 2-Hexanol        | NEFL    | 22.373  |
| HH | 2-Hexanol        | TAC4    | 22.373  |
| HH | 2-Hexanol        | OPRK1   | 80.882  |
| HH | 2-Hexanol        | TAC1    | 22.373  |
| HH | 2-Hexanol        | VCP     | 22.373  |
| HH | 2-Hexanol        | UCN2    | 22.373  |
| HH | 2-Hexanol        | CDH3    | 22.373  |
| HH | 2-Hexanol        | TRPM8   | 80.882  |
| HH | 2-Hexanol        | NGFR    | 22.373  |
| HH | 2-Hexanol        | HIF1A   | 22.373  |
| HH | 2-Hexanol        | SMO     | 22.373  |
| HH | 2-Hexanol        | CBFA2T3 | 22.373  |
| HH | 2-Hexanol        | TRPA1   | 80.882  |
| HH | 2-Hexanol        | ADRA2A  | 22.373  |
| HH | 2-Hexanol        | BNIP3   | 22.373  |
| HH | 2-Hexanol        | TACR2   | 22.373  |
| HH | 2-Hexanol        | NEFH    | 22.373  |
| HH | 2-Hexanol        | KCNK4   | 55.444  |
| HH | 2-Hexanol        | TRPV1   | 22.373  |
| HH | 2-Hexanol        | CRH     | 22.373  |
| HH | 2-Hexanol        | AQP1    | 22.373  |
| HH | 2-Hexanol        | CRHR2   | 22.373  |
| HH | Carthamidin      | SOAT1   | 122.778 |
| HH | Carthamidin      | DRD2    | 22.373  |
| HH | Carthamidin      | MTTP    | 122.778 |
| HH | Carthamidin      | PAWR    | 22.373  |
| HH | Carthamidin      | SOAT2   | 122.778 |
| HH | Carthamidin      | CNR2    | 48      |
| HH | Carthamidin      | CNR1    | 48      |
| HH | Neocarthamin     | SOAT1   | 48      |
| HH | Neocarthamin     | MTTP    | 48      |
| HH | Neocarthamin     | SOAT2   | 48      |
| HH | Gamma-Sitosterol | ESR1    | 122.778 |
| HH | Gamma-Sitosterol | SNW1    | 55.444  |
| HH | Gamma-Sitosterol | CYP24A1 | 22.373  |
| HH | Gamma-Sitosterol | CYP3A4  | 22.373  |
| HH | Gamma-Sitosterol | WNT4    | 22.373  |
| HH | Gamma-Sitosterol | PML     | 22.373  |
| HH | Gamma-Sitosterol | IRX5    | 22.373  |
| HH | Gamma-Sitosterol | PGR     | 122.778 |
| HH | Gamma-Sitosterol | AR      | 48      |
| HH | Gamma-Sitosterol | GPBAR1  | 22.373  |
| HH | Gamma-Sitosterol | CALB1   | 22.373  |
| HH | Gamma-Sitosterol | TCF3    | 22.373  |
| HH | Gamma-Sitosterol | B4GALT1 | 22.373  |
| HH | Gamma-Sitosterol | RXRA    | 22.373  |
| HH | Gamma-Sitosterol | VDR     | 80.882  |

|    |                    |          |         |
|----|--------------------|----------|---------|
| HH | Gamma-Sitosterol   | NR3C1    | 48      |
| HH | Gamma-Sitosterol   | SNAI2    | 22.373  |
| HH | Gamma-Sitosterol   | FGF23    | 22.373  |
| HH | Gamma-Sitosterol   | BAX      | 22.373  |
| HH | Gamma-Sitosterol   | S100G    | 22.373  |
| HH | Gamma-Sitosterol   | NR1H4    | 22.373  |
| HH | Gamma-Sitosterol   | CYP27B1  | 80.882  |
| HH | Gamma-Sitosterol   | NFKB1    | 22.373  |
| HH | Gamma-Sitosterol   | MED1     | 22.373  |
| HH | Gamma-Sitosterol   | GFI1     | 22.373  |
| HH | Gamma-Sitosterol   | KL       | 22.373  |
| HH | Gamma-Sitosterol   | CYP27A1  | 22.373  |
| HH | Gamma-Sitosterol   | TRIM24   | 22.373  |
| HH | Gamma-Sitosterol   | GC       | 55.444  |
| HH | Gamma-Sitosterol   | AKR1C3   | 22.373  |
| HH | Gamma-Sitosterol   | SNAI1    | 22.373  |
| HH | Gamma-Sitosterol   | LANCL2   | 22.373  |
| HH | Gamma-Sitosterol   | CYP2R1   | 22.373  |
| HH | Gamma-Sitosterol   | KANK2    | 22.373  |
| HH | Phenylacetaldehyde | PLAT     | 48      |
| HH | Phenylacetaldehyde | CFTR     | 48      |
| HH | Phenylacetaldehyde | THBD     | 48      |
| HH | Phenylacetaldehyde | PTGS1    | 48      |
| HH | Phenylacetaldehyde | PPARG    | 48      |
| HH | Phenylacetaldehyde | PTGS2    | 48      |
| HH | Phenylacetaldehyde | BCL2     | 48      |
| HH | Phenylacetaldehyde | FABP2    | 48      |
| HH | Arachidic Acid     | AKR1D1   | 686     |
| HH | Arachidic Acid     | ABAT     | 122.778 |
| HH | Arachidic Acid     | COX5B    | 122.778 |
| HH | Arachidic Acid     | SCN7A    | 122.778 |
| HH | Arachidic Acid     | COX5A    | 122.778 |
| HH | Arachidic Acid     | COX4I1   | 122.778 |
| HH | Arachidic Acid     | SCN4A    | 122.778 |
| HH | Arachidic Acid     | CES1     | 122.778 |
| HH | Arachidic Acid     | COX2     | 122.778 |
| HH | Arachidic Acid     | SUCLG2   | 80.882  |
| HH | Arachidic Acid     | SLC25A10 | 80.882  |
| HH | Arachidic Acid     | SUCNR1   | 80.882  |
| HH | Arachidic Acid     | OXCT1    | 80.882  |
| HH | Arachidic Acid     | SDHA     | 80.882  |
| HH | Arachidic Acid     | DCT      | 55.444  |
| HH | Arachidic Acid     | JMJD6    | 55.444  |
| HH | Arachidic Acid     | HSD17B11 | 55.444  |
| HH | Arachidic Acid     | P4HB     | 55.444  |
| HH | Arachidic Acid     | GRIN3B   | 48      |
| HH | Arachidic Acid     | CACNA1B  | 48      |
| HH | Arachidic Acid     | GRIN3A   | 48      |
| HH | Arachidic Acid     | GRIN1    | 48      |
| HH | Arachidic Acid     | SIRT1    | 22.373  |
| HH | Arachidic Acid     | SIX1     | 22.373  |

|    |                |          |         |
|----|----------------|----------|---------|
| HH | Arachidic Acid | OSBPL8   | 22.373  |
| HH | Arachidic Acid | UBE2B    | 22.373  |
| HH | Arachidic Acid | STIM2    | 22.373  |
| HH | Arachidic Acid | COLGALT1 | 22.373  |
| HH | Arachidic Acid | ARID1A   | 22.373  |
| HH | Arachidic Acid | ACOT4    | 22.373  |
| HH | Arachidic Acid | SLC25A12 | 22.373  |
| HH | Arachidic Acid | CDH11    | 22.373  |
| HH | Arachidic Acid | BDKRB2   | 22.373  |
| HH | Arachidic Acid | SMAD7    | 22.373  |
| HH | Arachidic Acid | WNT10B   | 22.373  |
| HH | Arachidic Acid | STAR     | 22.373  |
| HH | Arachidic Acid | CAMK2D   | 22.373  |
| HH | Arachidic Acid | HTT      | 22.373  |
| HH | Arachidic Acid | TST      | 22.373  |
| HH | Arachidic Acid | TMEM110  | 22.373  |
| HH | Arachidic Acid | EPHA4    | 22.373  |
| HH | Arachidic Acid | EDA      | 22.373  |
| HH | Arachidic Acid | KCNQ1    | 22.373  |
| HH | Arachidic Acid | UGT1A1   | 22.373  |
| HH | Arachidic Acid | PLOD2    | 22.373  |
| HH | Arachidic Acid | SLC25A1  | 22.373  |
| HH | Arachidic Acid | TYR      | 686     |
| HH | Arachidic Acid | SCN1A    | 122.778 |
| HH | Arachidic Acid | COX7C    | 122.778 |
| HH | Arachidic Acid | SCN5A    | 122.778 |
| HH | Arachidic Acid | COX3     | 122.778 |
| HH | Arachidic Acid | HDAC9    | 122.778 |
| HH | Arachidic Acid | SCN4B    | 122.778 |
| HH | Arachidic Acid | ACADSB   | 122.778 |
| HH | Arachidic Acid | OGDH     | 122.778 |
| HH | Arachidic Acid | SLC13A2  | 80.882  |
| HH | Arachidic Acid | P3H3     | 80.882  |
| HH | Arachidic Acid | SLC13A3  | 80.882  |
| HH | Arachidic Acid | PLOD3    | 80.882  |
| HH | Arachidic Acid | P4HA2    | 80.882  |
| HH | Arachidic Acid | AKR1C3   | 55.444  |
| HH | Arachidic Acid | SLC13A4  | 55.444  |
| HH | Arachidic Acid | TYRP1    | 55.444  |
| HH | Arachidic Acid | CACNA2D1 | 48      |
| HH | Arachidic Acid | CACNA2D2 | 48      |
| HH | Arachidic Acid | GRIN2C   | 48      |
| HH | Arachidic Acid | SLC7A1   | 48      |
| HH | Arachidic Acid | HDAC1    | 23      |
| HH | Arachidic Acid | SHMT1    | 22.373  |
| HH | Arachidic Acid | BDH1     | 22.373  |
| HH | Arachidic Acid | SPI1     | 22.373  |
| HH | Arachidic Acid | CYP1A2   | 22.373  |
| HH | Arachidic Acid | PKD2     | 22.373  |
| HH | Arachidic Acid | NEDD4    | 22.373  |
| HH | Arachidic Acid | EGLN2    | 22.373  |

|    |                |          |         |
|----|----------------|----------|---------|
| HH | Arachidic Acid | PHGDH    | 22.373  |
| HH | Arachidic Acid | YBX3     | 22.373  |
| HH | Arachidic Acid | CACNA1D  | 22.373  |
| HH | Arachidic Acid | PRPH     | 22.373  |
| HH | Arachidic Acid | PRDM8    | 22.373  |
| HH | Arachidic Acid | OGFOD1   | 22.373  |
| HH | Arachidic Acid | DLST     | 22.373  |
| HH | Arachidic Acid | AP3D1    | 22.373  |
| HH | Arachidic Acid | IL10     | 22.373  |
| HH | Arachidic Acid | SLC1A6   | 22.373  |
| HH | Arachidic Acid | CDC42    | 22.373  |
| HH | Arachidic Acid | OCA2     | 22.373  |
| HH | Arachidic Acid | HACL1    | 22.373  |
| HH | Arachidic Acid | CASQ2    | 22.373  |
| HH | Arachidic Acid | DLD      | 22.373  |
| HH | Arachidic Acid | CYP1A1   | 22.373  |
| HH | Arachidic Acid | SRD5A2   | 686     |
| HH | Arachidic Acid | ESRRG    | 122.778 |
| HH | Arachidic Acid | COX1     | 122.778 |
| HH | Arachidic Acid | SCN10A   | 122.778 |
| HH | Arachidic Acid | AR       | 122.778 |
| HH | Arachidic Acid | PLA2G1B  | 122.778 |
| HH | Arachidic Acid | ADH1C    | 122.778 |
| HH | Arachidic Acid | SCN8A    | 122.778 |
| HH | Arachidic Acid | HDAC2    | 122.778 |
| HH | Arachidic Acid | SLC13A1  | 80.882  |
| HH | Arachidic Acid | OXCT2    | 80.882  |
| HH | Arachidic Acid | ASPH     | 80.882  |
| HH | Arachidic Acid | P4HA1    | 80.882  |
| HH | Arachidic Acid | SUCLA2   | 80.882  |
| HH | Arachidic Acid | CRTAP    | 55.444  |
| HH | Arachidic Acid | SDHAF2   | 55.444  |
| HH | Arachidic Acid | HIF1AN   | 55.444  |
| HH | Arachidic Acid | PLAT     | 48      |
| HH | Arachidic Acid | GRIN2A   | 48      |
| HH | Arachidic Acid | GRIN2B   | 48      |
| HH | Arachidic Acid | SLC7A4   | 48      |
| HH | Arachidic Acid | GPD1L    | 22.373  |
| HH | Arachidic Acid | SUGCT    | 22.373  |
| HH | Arachidic Acid | COLGALT2 | 22.373  |
| HH | Arachidic Acid | SUOX     | 22.373  |
| HH | Arachidic Acid | CCL5     | 22.373  |
| HH | Arachidic Acid | ALDH9A1  | 22.373  |
| HH | Arachidic Acid | CYP11A1  | 22.373  |
| HH | Arachidic Acid | ACAT1    | 22.373  |
| HH | Arachidic Acid | PNLIPRP2 | 22.373  |
| HH | Arachidic Acid | 8-Mar    | 22.373  |
| HH | Arachidic Acid | DDC      | 22.373  |
| HH | Arachidic Acid | BCKDHB   | 22.373  |
| HH | Arachidic Acid | UROD     | 22.373  |
| HH | Arachidic Acid | SLC38A7  | 22.373  |

|    |                |         |         |
|----|----------------|---------|---------|
| HH | Arachidic Acid | PF4     | 22.373  |
| HH | Arachidic Acid | MYO5A   | 22.373  |
| HH | Arachidic Acid | EGLN3   | 22.373  |
| HH | Arachidic Acid | NPPA    | 22.373  |
| HH | Arachidic Acid | ARHGEF2 | 22.373  |
| HH | Arachidic Acid | HSD17B8 | 22.373  |
| HH | Arachidic Acid | RYR2    | 22.373  |
| HH | Arachidic Acid | GJA5    | 22.373  |
| HH | Arachidic Acid | GNAS    | 22.373  |
| HH | Arachidic Acid | SULT2A1 | 22.373  |
| HH | Arachidic Acid | SCN11A  | 122.778 |
| HH | Arachidic Acid | SCN3B   | 122.778 |
| HH | Arachidic Acid | SCN3A   | 122.778 |
| HH | Arachidic Acid | ALDH5A1 | 122.778 |
| HH | Arachidic Acid | COX7A1  | 122.778 |
| HH | Arachidic Acid | COX6A2  | 122.778 |
| HH | Arachidic Acid | COX6B1  | 122.778 |
| HH | Arachidic Acid | COX7B   | 122.778 |
| HH | Arachidic Acid | COX8A   | 122.778 |
| HH | Arachidic Acid | SUCLG1  | 80.882  |
| HH | Arachidic Acid | TMLHE   | 80.882  |
| HH | Arachidic Acid | BBOX1   | 80.882  |
| HH | Arachidic Acid | SDHC    | 80.882  |
| HH | Arachidic Acid | SDHD    | 80.882  |
| HH | Arachidic Acid | SLIT2   | 55.444  |
| HH | Arachidic Acid | SLC1A3  | 55.444  |
| HH | Arachidic Acid | UROS    | 55.444  |
| HH | Arachidic Acid | SLC7A2  | 48      |
| HH | Arachidic Acid | TOP1    | 48      |
| HH | Arachidic Acid | SLC7A3  | 48      |
| HH | Arachidic Acid | GRIN2D  | 48      |
| HH | Arachidic Acid | SRD5A1  | 22.373  |
| HH | Arachidic Acid | ACSS2   | 22.373  |
| HH | Arachidic Acid | SIX4    | 22.373  |
| HH | Arachidic Acid | CCL2    | 22.373  |
| HH | Arachidic Acid | ANK2    | 22.373  |
| HH | Arachidic Acid | TH      | 22.373  |
| HH | Arachidic Acid | DHODH   | 22.373  |
| HH | Arachidic Acid | GALC    | 22.373  |
| HH | Arachidic Acid | CYP39A1 | 22.373  |
| HH | Arachidic Acid | STIM1   | 22.373  |
| HH | Arachidic Acid | DHTKD1  | 22.373  |
| HH | Arachidic Acid | KCNE5   | 22.373  |
| HH | Arachidic Acid | UGT8    | 22.373  |
| HH | Arachidic Acid | ACSS1   | 22.373  |
| HH | Arachidic Acid | CRACR2A | 22.373  |
| HH | Arachidic Acid | ILVBL   | 22.373  |
| HH | Arachidic Acid | OGDHL   | 22.373  |
| HH | Arachidic Acid | ACADM   | 22.373  |
| HH | Arachidic Acid | EGLN1   | 22.373  |
| HH | Arachidic Acid | CTNNB1  | 22.373  |

|    |                 |          |         |
|----|-----------------|----------|---------|
| HH | Arachidic Acid  | HAP1     | 22.373  |
| HH | Arachidic Acid  | DHRS9    | 22.373  |
| HH | Arachidic Acid  | SLC25A13 | 22.373  |
| HH | Arachidic Acid  | NFX1     | 22.373  |
| HH | Arachidic Acid  | SCN2B    | 122.778 |
| HH | Arachidic Acid  | COX6C    | 122.778 |
| HH | Arachidic Acid  | AKR1C2   | 122.778 |
| HH | Arachidic Acid  | SCN2A    | 122.778 |
| HH | Arachidic Acid  | FECH     | 122.778 |
| HH | Arachidic Acid  | SCN9A    | 122.778 |
| HH | Arachidic Acid  | FABP6    | 122.778 |
| HH | Arachidic Acid  | SCN1B    | 122.778 |
| HH | Arachidic Acid  | NR1H4    | 122.778 |
| HH | Arachidic Acid  | HSD17B6  | 80.882  |
| HH | Arachidic Acid  | PLOD1    | 80.882  |
| HH | Arachidic Acid  | SDHB     | 80.882  |
| HH | Arachidic Acid  | P3H2     | 80.882  |
| HH | Arachidic Acid  | P3H1     | 80.882  |
| HH | Arachidic Acid  | ACO2     | 55.444  |
| HH | Arachidic Acid  | SALL1    | 55.444  |
| HH | Arachidic Acid  | SLC13A5  | 55.444  |
| HH | Arachidic Acid  | CACNA1A  | 48      |
| HH | Arachidic Acid  | PLG      | 48      |
| HH | Arachidic Acid  | KARS     | 48      |
| HH | Arachidic Acid  | ADORA1   | 48      |
| HH | Arachidic Acid  | FBXO45   | 22.373  |
| HH | Arachidic Acid  | ARV1     | 22.373  |
| HH | Arachidic Acid  | MRPS36   | 22.373  |
| HH | Arachidic Acid  | BCKDK    | 22.373  |
| HH | Arachidic Acid  | HSD17B2  | 22.373  |
| HH | Arachidic Acid  | EPO      | 22.373  |
| HH | Arachidic Acid  | CLN3     | 22.373  |
| HH | Arachidic Acid  | PLCG2    | 22.373  |
| HH | Arachidic Acid  | BCKDHA   | 22.373  |
| HH | Arachidic Acid  | GAL3ST1  | 22.373  |
| HH | Arachidic Acid  | NEDD4L   | 22.373  |
| HH | Arachidic Acid  | SRD5A3   | 22.373  |
| HH | Arachidic Acid  | ETHE1    | 22.373  |
| HH | Arachidic Acid  | CYP4B1   | 22.373  |
| HH | Arachidic Acid  | HSD17B1  | 22.373  |
| HH | Arachidic Acid  | CAV3     | 22.373  |
| HH | Arachidic Acid  | KCNA5    | 22.373  |
| HH | Arachidic Acid  | SQRDL    | 22.373  |
| HH | Arachidic Acid  | ETFDH    | 22.373  |
| HH | Arachidic Acid  | P4HA3    | 22.373  |
| HH | Arachidic Acid  | PCSK9    | 22.373  |
| HH | Arachidic Acid  | GPR143   | 22.373  |
| HH | Arachidic Acid  | SFXN5    | 22.373  |
| HH | Arachidic Acid  | DBT      | 22.373  |
| HH | Lauric Aldehyde | SCN11A   | 48      |
| HH | Lauric Aldehyde | SCN3A    | 48      |

|    |                 |         |        |
|----|-----------------|---------|--------|
| HH | Lauric Aldehyde | ALDH5A1 | 48     |
| HH | Lauric Aldehyde | SCN4A   | 48     |
| HH | Lauric Aldehyde | SCN1B   | 48     |
| HH | Lauric Aldehyde | SCN2B   | 48     |
| HH | Lauric Aldehyde | SCN7A   | 48     |
| HH | Lauric Aldehyde | SCN2A   | 48     |
| HH | Lauric Aldehyde | SCN4B   | 48     |
| HH | Lauric Aldehyde | OGDH    | 48     |
| HH | Lauric Aldehyde | ABAT    | 48     |
| HH | Lauric Aldehyde | SCN5A   | 48     |
| HH | Lauric Aldehyde | HDAC9   | 48     |
| HH | Lauric Aldehyde | SRD5A2  | 48     |
| HH | Lauric Aldehyde | HDAC2   | 48     |
| HH | Lauric Aldehyde | SCN1A   | 48     |
| HH | Lauric Aldehyde | SCN10A  | 48     |
| HH | Lauric Aldehyde | TYR     | 48     |
| HH | Lauric Aldehyde | ACADSB  | 48     |
| HH | Lauric Aldehyde | SCN3B   | 48     |
| HH | Lauric Aldehyde | AKR1D1  | 48     |
| HH | Lauric Aldehyde | SCN9A   | 48     |
| HH | Lauric Aldehyde | SCN8A   | 48     |
| SQ | etradecane      | KCND1   | 80.882 |
| SQ | etradecane      | GAMT    | 80.882 |
| SQ | etradecane      | CAT     | 80.882 |
| SQ | etradecane      | KCNC1   | 80.882 |
| SQ | etradecane      | KCND2   | 80.882 |
| SQ | etradecane      | KCND3   | 80.882 |
| SQ | etradecane      | KCNQ1   | 55.444 |
| SQ | etradecane      | CYGB    | 22.373 |
| SQ | etradecane      | IGF1    | 22.373 |
| SQ | etradecane      | EDN1    | 22.373 |
| SQ | etradecane      | CNTNAP4 | 22.373 |
| SQ | etradecane      | GRIN2A  | 22.373 |
| SQ | etradecane      | SPARC   | 22.373 |
| SQ | etradecane      | CRLF1   | 22.373 |
| SQ | etradecane      | ALDH1B1 | 22.373 |
| SQ | etradecane      | DARS    | 22.373 |
| SQ | etradecane      | MIP     | 22.373 |
| SQ | etradecane      | STX1A   | 22.373 |
| SQ | etradecane      | NRXN2   | 22.373 |
| SQ | etradecane      | DAB2IP  | 22.373 |
| SQ | etradecane      | KCNA3   | 80.882 |
| SQ | etradecane      | KCNC3   | 80.882 |
| SQ | etradecane      | KCNB1   | 80.882 |
| SQ | etradecane      | ADH1C   | 80.882 |
| SQ | etradecane      | ALDH2   | 80.882 |
| SQ | etradecane      | GUCY1B3 | 55.444 |
| SQ | etradecane      | FBP1    | 22.373 |
| SQ | etradecane      | NRXN3   | 22.373 |
| SQ | etradecane      | SHANK3  | 22.373 |
| SQ | etradecane      | OXT     | 22.373 |



|    |            |         |        |
|----|------------|---------|--------|
| SQ | etradecane | RNASE4  | 22.373 |
| SQ | etradecane | SLC17A7 | 22.373 |
| SQ | etradecane | SORCS3  | 22.373 |
| SQ | etradecane | FADD    | 22.373 |
| SQ | etradecane | LEP     | 22.373 |
| SQ | etradecane | ANK3    | 22.373 |
| SQ | etradecane | RYR3    | 22.373 |
| SQ | etradecane | PAXBP1  | 22.373 |
| SQ | etradecane | ADORA1  | 22.373 |
| SQ | etradecane | CYP2E1  | 22.373 |
| SQ | etradecane | PRKAB1  | 80.882 |
| SQ | etradecane | KCNA1   | 80.882 |
| SQ | etradecane | ADH1B   | 80.882 |
| SQ | etradecane | KCNB2   | 80.882 |
| SQ | etradecane | KCNA4   | 80.882 |
| SQ | etradecane | GATM    | 55.444 |
| SQ | etradecane | DGKI    | 22.373 |
| SQ | etradecane | LRRC4B  | 22.373 |
| SQ | etradecane | ACY3    | 22.373 |
| SQ | etradecane | MAGI2   | 22.373 |
| SQ | etradecane | RAB3A   | 22.373 |
| SQ | etradecane | CYP11A1 | 22.373 |
| SQ | etradecane | RNASE8  | 22.373 |
| SQ | etradecane | SNTG2   | 22.373 |
| SQ | etradecane | NLGN1   | 22.373 |
| SQ | etradecane | KCNE5   | 22.373 |
| SQ | etradecane | ZPR1    | 22.373 |
| SQ | etradecane | PAX7    | 22.373 |
| SQ | etradecane | ADH4    | 22.373 |
| SQ | etradecane | ACY1    | 22.373 |
| SQ | etradecane | ADH1A   | 80.882 |
| SQ | etradecane | KCNA2   | 80.882 |
| SQ | etradecane | DLG4    | 80.882 |
| SQ | etradecane | KCNA5   | 80.882 |
| SQ | etradecane | KCNA7   | 80.882 |
| SQ | etradecane | KCNK4   | 55.444 |
| SQ | etradecane | ADH7    | 22.373 |
| SQ | etradecane | AQP8    | 22.373 |
| SQ | etradecane | ASPA    | 22.373 |
| SQ | etradecane | APOE    | 22.373 |
| SQ | etradecane | MC4R    | 22.373 |
| SQ | etradecane | SCN5A   | 22.373 |
| SQ | etradecane | KCNIP2  | 22.373 |
| SQ | etradecane | SCGB1A1 | 22.373 |
| SQ | etradecane | CACNA1D | 22.373 |
| SQ | etradecane | PPARD   | 22.373 |
| SQ | etradecane | ALDH3B1 | 22.373 |
| SQ | etradecane | ALDH3B2 | 22.373 |
| SQ | etradecane | GJA5    | 22.373 |
| SQ | etradecane | KCNA10  | 80.882 |
| SQ | etradecane | TPO     | 80.882 |

|    |            |         |        |
|----|------------|---------|--------|
| SQ | etradecane | KCNC2   | 80.882 |
| SQ | etradecane | RNASE1  | 80.882 |
| SQ | etradecane | KCNA6   | 80.882 |
| SQ | etradecane | IYD     | 55.444 |
| SQ | etradecane | NFIB    | 22.373 |
| SQ | etradecane | ARX     | 22.373 |
| SQ | etradecane | NRXN1   | 22.373 |
| SQ | etradecane | SOX15   | 22.373 |
| SQ | etradecane | IL1B    | 22.373 |
| SQ | etradecane | SCN10A  | 22.373 |
| SQ | etradecane | GPX7    | 22.373 |
| SQ | etradecane | OXTR    | 22.373 |
| SQ | etradecane | RAPGEF2 | 22.373 |
| SQ | etradecane | NKX2-1  | 22.373 |
| SQ | etradecane | NPPA    | 22.373 |
| SQ | etradecane | RNASE2  | 22.373 |
| SQ | etradecane | FAS     | 22.373 |
| SQ | Tridecene  | KCND1   | 80.882 |
| SQ | Tridecene  | GAMT    | 80.882 |
| SQ | Tridecene  | CAT     | 80.882 |
| SQ | Tridecene  | KCNC1   | 80.882 |
| SQ | Tridecene  | KCND2   | 80.882 |
| SQ | Tridecene  | KCND3   | 80.882 |
| SQ | Tridecene  | KCNQ1   | 55.444 |
| SQ | Tridecene  | CYGB    | 22.373 |
| SQ | Tridecene  | IGF1    | 22.373 |
| SQ | Tridecene  | EDN1    | 22.373 |
| SQ | Tridecene  | CNTNAP4 | 22.373 |
| SQ | Tridecene  | GRIN2A  | 22.373 |
| SQ | Tridecene  | SPARC   | 22.373 |
| SQ | Tridecene  | CRLF1   | 22.373 |
| SQ | Tridecene  | ALDH1B1 | 22.373 |
| SQ | Tridecene  | DARS    | 22.373 |
| SQ | Tridecene  | MIP     | 22.373 |
| SQ | Tridecene  | STX1A   | 22.373 |
| SQ | Tridecene  | NRXN2   | 22.373 |
| SQ | Tridecene  | DAB2IP  | 22.373 |
| SQ | Tridecene  | KCNA3   | 80.882 |
| SQ | Tridecene  | KCNC3   | 80.882 |
| SQ | Tridecene  | KCNB1   | 80.882 |
| SQ | Tridecene  | ADH1C   | 80.882 |
| SQ | Tridecene  | ALDH2   | 80.882 |
| SQ | Tridecene  | GUCY1B3 | 55.444 |
| SQ | Tridecene  | FBP1    | 22.373 |
| SQ | Tridecene  | NRXN3   | 22.373 |
| SQ | Tridecene  | SHANK3  | 22.373 |
| SQ | Tridecene  | OXT     | 22.373 |
| SQ | Tridecene  | RNASE4  | 22.373 |
| SQ | Tridecene  | SLC17A7 | 22.373 |
| SQ | Tridecene  | SORCS3  | 22.373 |
| SQ | Tridecene  | FADD    | 22.373 |

|    |           |         |        |
|----|-----------|---------|--------|
| SQ | Tridecene | LEP     | 22.373 |
| SQ | Tridecene | ANK3    | 22.373 |
| SQ | Tridecene | RYR3    | 22.373 |
| SQ | Tridecene | PAXBP1  | 22.373 |
| SQ | Tridecene | ADORA1  | 22.373 |
| SQ | Tridecene | CYP2E1  | 22.373 |
| SQ | Tridecene | PRKAB1  | 80.882 |
| SQ | Tridecene | KCNA1   | 80.882 |
| SQ | Tridecene | ADH1B   | 80.882 |
| SQ | Tridecene | KCNB2   | 80.882 |
| SQ | Tridecene | KCNA4   | 80.882 |
| SQ | Tridecene | GATM    | 55.444 |
| SQ | Tridecene | DGKI    | 22.373 |
| SQ | Tridecene | LRRC4B  | 22.373 |
| SQ | Tridecene | ACY3    | 22.373 |
| SQ | Tridecene | MAGI2   | 22.373 |
| SQ | Tridecene | RAB3A   | 22.373 |
| SQ | Tridecene | CYP11A1 | 22.373 |
| SQ | Tridecene | RNASE8  | 22.373 |
| SQ | Tridecene | SNTG2   | 22.373 |
| SQ | Tridecene | NLGN1   | 22.373 |
| SQ | Tridecene | KCNE5   | 22.373 |
| SQ | Tridecene | ZPR1    | 22.373 |
| SQ | Tridecene | PAX7    | 22.373 |
| SQ | Tridecene | ADH4    | 22.373 |
| SQ | Tridecene | ACY1    | 22.373 |
| SQ | Tridecene | ADH1A   | 80.882 |
| SQ | Tridecene | KCNA2   | 80.882 |
| SQ | Tridecene | DLG4    | 80.882 |
| SQ | Tridecene | KCNA5   | 80.882 |
| SQ | Tridecene | KCNA7   | 80.882 |
| SQ | Tridecene | KCNK4   | 55.444 |
| SQ | Tridecene | ADH7    | 22.373 |
| SQ | Tridecene | AQP8    | 22.373 |
| SQ | Tridecene | ASPA    | 22.373 |
| SQ | Tridecene | APOE    | 22.373 |
| SQ | Tridecene | MC4R    | 22.373 |
| SQ | Tridecene | SCN5A   | 22.373 |
| SQ | Tridecene | KCNIP2  | 22.373 |
| SQ | Tridecene | SCGB1A1 | 22.373 |
| SQ | Tridecene | CACNA1D | 22.373 |
| SQ | Tridecene | PPARD   | 22.373 |
| SQ | Tridecene | ALDH3B1 | 22.373 |
| SQ | Tridecene | ALDH3B2 | 22.373 |
| SQ | Tridecene | GJA5    | 22.373 |
| SQ | Tridecene | KCNA10  | 80.882 |
| SQ | Tridecene | TPO     | 80.882 |
| SQ | Tridecene | KCNC2   | 80.882 |
| SQ | Tridecene | RNASE1  | 80.882 |
| SQ | Tridecene | KCNA6   | 80.882 |
| SQ | Tridecene | IYD     | 55.444 |

|    |                   |         |         |
|----|-------------------|---------|---------|
| SQ | Tridecene         | NFIB    | 22.373  |
| SQ | Tridecene         | ARX     | 22.373  |
| SQ | Tridecene         | NRXN1   | 22.373  |
| SQ | Tridecene         | SOX15   | 22.373  |
| SQ | Tridecene         | IL1B    | 22.373  |
| SQ | Tridecene         | SCN10A  | 22.373  |
| SQ | Tridecene         | GPX7    | 22.373  |
| SQ | Tridecene         | OXTR    | 22.373  |
| SQ | Tridecene         | RAPGEF2 | 22.373  |
| SQ | Tridecene         | NKX2-1  | 22.373  |
| SQ | Tridecene         | NPPA    | 22.373  |
| SQ | Tridecene         | RNASE2  | 22.373  |
| SQ | Tridecene         | FAS     | 22.373  |
| SQ | 1,22-Docosanediol | TRPV3   | 122.778 |
| SQ | 1,22-Docosanediol | GRIA4   | 80.882  |
| SQ | 1,22-Docosanediol | CHRN3B  | 80.882  |
| SQ | 1,22-Docosanediol | GABRG3  | 80.882  |
| SQ | 1,22-Docosanediol | GABRA3  | 80.882  |
| SQ | 1,22-Docosanediol | CHRNA10 | 80.882  |
| SQ | 1,22-Docosanediol | CACNA1C | 80.882  |
| SQ | 1,22-Docosanediol | CHRNA2  | 80.882  |
| SQ | 1,22-Docosanediol | HTR3B   | 80.882  |
| SQ | 1,22-Docosanediol | GABRA6  | 80.882  |
| SQ | 1,22-Docosanediol | CHRNA5  | 80.882  |
| SQ | 1,22-Docosanediol | CACNG1  | 80.882  |
| SQ | 1,22-Docosanediol | DMTN    | 55.444  |
| SQ | 1,22-Docosanediol | SCN1A   | 48      |
| SQ | 1,22-Docosanediol | SCN10A  | 48      |
| SQ | 1,22-Docosanediol | TYR     | 48      |
| SQ | 1,22-Docosanediol | ACADSB  | 48      |
| SQ | 1,22-Docosanediol | GLRA3   | 23      |
| SQ | 1,22-Docosanediol | NAV2    | 22.373  |
| SQ | 1,22-Docosanediol | CACNA1A | 22.373  |
| SQ | 1,22-Docosanediol | MTNR1B  | 22.373  |
| SQ | 1,22-Docosanediol | FLOT1   | 22.373  |
| SQ | 1,22-Docosanediol | ADRA1D  | 22.373  |
| SQ | 1,22-Docosanediol | MAOA    | 22.373  |
| SQ | 1,22-Docosanediol | RAB3B   | 22.373  |
| SQ | 1,22-Docosanediol | DRD4    | 22.373  |
| SQ | 1,22-Docosanediol | AOC3    | 22.373  |
| SQ | 1,22-Docosanediol | RNF207  | 22.373  |
| SQ | 1,22-Docosanediol | NPPA    | 22.373  |
| SQ | 1,22-Docosanediol | EPHB1   | 22.373  |
| SQ | 1,22-Docosanediol | PINK1   | 22.373  |
| SQ | 1,22-Docosanediol | KISS1   | 22.373  |
| SQ | 1,22-Docosanediol | OPRK1   | 122.778 |
| SQ | 1,22-Docosanediol | GABRA2  | 80.882  |
| SQ | 1,22-Docosanediol | GABRB1  | 80.882  |
| SQ | 1,22-Docosanediol | VCAM1   | 80.882  |
| SQ | 1,22-Docosanediol | SLC29A1 | 80.882  |
| SQ | 1,22-Docosanediol | GRIA2   | 80.882  |

|    |                   |         |         |
|----|-------------------|---------|---------|
| SQ | 1,22-Docosanediol | CHRN2   | 80.882  |
| SQ | 1,22-Docosanediol | CHRNA6  | 80.882  |
| SQ | 1,22-Docosanediol | GRIA3   | 80.882  |
| SQ | 1,22-Docosanediol | HTR3A   | 80.882  |
| SQ | 1,22-Docosanediol | CHRN4   | 80.882  |
| SQ | 1,22-Docosanediol | ADAM8   | 55.444  |
| SQ | 1,22-Docosanediol | KCNMA1  | 55.444  |
| SQ | 1,22-Docosanediol | SCN3B   | 48      |
| SQ | 1,22-Docosanediol | AKR1D1  | 48      |
| SQ | 1,22-Docosanediol | SCN9A   | 48      |
| SQ | 1,22-Docosanediol | SCN8A   | 48      |
| SQ | 1,22-Docosanediol | HMGA2   | 22.373  |
| SQ | 1,22-Docosanediol | P2RX2   | 22.373  |
| SQ | 1,22-Docosanediol | ANK2    | 22.373  |
| SQ | 1,22-Docosanediol | MAOB    | 22.373  |
| SQ | 1,22-Docosanediol | NPY5R   | 22.373  |
| SQ | 1,22-Docosanediol | DRD2    | 22.373  |
| SQ | 1,22-Docosanediol | UTS2R   | 22.373  |
| SQ | 1,22-Docosanediol | KCNE5   | 22.373  |
| SQ | 1,22-Docosanediol | CRH     | 22.373  |
| SQ | 1,22-Docosanediol | NCOA1   | 22.373  |
| SQ | 1,22-Docosanediol | ROCK1   | 22.373  |
| SQ | 1,22-Docosanediol | KMT2A   | 22.373  |
| SQ | 1,22-Docosanediol | DRD1    | 22.373  |
| SQ | 1,22-Docosanediol | KCNQ1   | 22.373  |
| SQ | 1,22-Docosanediol | GRM7    | 22.373  |
| SQ | 1,22-Docosanediol | TRPM8   | 122.778 |
| SQ | 1,22-Docosanediol | CACNG2  | 80.882  |
| SQ | 1,22-Docosanediol | GRIA1   | 80.882  |
| SQ | 1,22-Docosanediol | CHRNA7  | 80.882  |
| SQ | 1,22-Docosanediol | CACNA1S | 80.882  |
| SQ | 1,22-Docosanediol | GABRA4  | 80.882  |
| SQ | 1,22-Docosanediol | CACNA1D | 80.882  |
| SQ | 1,22-Docosanediol | GABRB3  | 80.882  |
| SQ | 1,22-Docosanediol | GABRA5  | 80.882  |
| SQ | 1,22-Docosanediol | GABRA1  | 80.882  |
| SQ | 1,22-Docosanediol | KCNJ9   | 80.882  |
| SQ | 1,22-Docosanediol | SLC28A3 | 55.444  |
| SQ | 1,22-Docosanediol | SCN11A  | 48      |
| SQ | 1,22-Docosanediol | SCN3A   | 48      |
| SQ | 1,22-Docosanediol | ALDH5A1 | 48      |
| SQ | 1,22-Docosanediol | SCN4A   | 48      |
| SQ | 1,22-Docosanediol | SCN1B   | 48      |
| SQ | 1,22-Docosanediol | CACNA1H | 22.373  |
| SQ | 1,22-Docosanediol | HTR2A   | 22.373  |
| SQ | 1,22-Docosanediol | ZP4     | 22.373  |
| SQ | 1,22-Docosanediol | GLRB    | 22.373  |
| SQ | 1,22-Docosanediol | MSN     | 22.373  |
| SQ | 1,22-Docosanediol | AVP     | 22.373  |
| SQ | 1,22-Docosanediol | ADIRF   | 22.373  |
| SQ | 1,22-Docosanediol | CNR1    | 22.373  |

|    |                   |          |         |
|----|-------------------|----------|---------|
| SQ | 1,22-Docosanediol | GLI3     | 22.373  |
| SQ | 1,22-Docosanediol | AOC2     | 22.373  |
| SQ | 1,22-Docosanediol | KCNA5    | 22.373  |
| SQ | 1,22-Docosanediol | TNR      | 22.373  |
| SQ | 1,22-Docosanediol | EEA1     | 22.373  |
| SQ | 1,22-Docosanediol | ICAM1    | 22.373  |
| SQ | 1,22-Docosanediol | FOS      | 22.373  |
| SQ | 1,22-Docosanediol | TRPA1    | 122.778 |
| SQ | 1,22-Docosanediol | GABRD    | 80.882  |
| SQ | 1,22-Docosanediol | GLRA2    | 80.882  |
| SQ | 1,22-Docosanediol | KCNJ6    | 80.882  |
| SQ | 1,22-Docosanediol | GABRG1   | 80.882  |
| SQ | 1,22-Docosanediol | CHRNA3   | 80.882  |
| SQ | 1,22-Docosanediol | HTR3D    | 80.882  |
| SQ | 1,22-Docosanediol | KCNJ5    | 80.882  |
| SQ | 1,22-Docosanediol | SLC29A2  | 80.882  |
| SQ | 1,22-Docosanediol | CHRNA9   | 80.882  |
| SQ | 1,22-Docosanediol | HTR3C    | 80.882  |
| SQ | 1,22-Docosanediol | ADRA1B   | 55.444  |
| SQ | 1,22-Docosanediol | SCN2B    | 48      |
| SQ | 1,22-Docosanediol | SCN7A    | 48      |
| SQ | 1,22-Docosanediol | SCN2A    | 48      |
| SQ | 1,22-Docosanediol | SCN4B    | 48      |
| SQ | 1,22-Docosanediol | OGDH     | 48      |
| SQ | 1,22-Docosanediol | SLITRK6  | 22.373  |
| SQ | 1,22-Docosanediol | AVPR1A   | 22.373  |
| SQ | 1,22-Docosanediol | SUMO1    | 22.373  |
| SQ | 1,22-Docosanediol | P2RX3    | 22.373  |
| SQ | 1,22-Docosanediol | GHRL     | 22.373  |
| SQ | 1,22-Docosanediol | PAX2     | 22.373  |
| SQ | 1,22-Docosanediol | GHRH     | 22.373  |
| SQ | 1,22-Docosanediol | SLC18A3  | 22.373  |
| SQ | 1,22-Docosanediol | CAV3     | 22.373  |
| SQ | 1,22-Docosanediol | IL6      | 22.373  |
| SQ | 1,22-Docosanediol | TACR2    | 22.373  |
| SQ | 1,22-Docosanediol | ZP3      | 22.373  |
| SQ | 1,22-Docosanediol | POU4F3   | 22.373  |
| SQ | 1,22-Docosanediol | CARTPT   | 22.373  |
| SQ | 1,22-Docosanediol | GRIN1    | 22.373  |
| SQ | 1,22-Docosanediol | CACNB1   | 80.882  |
| SQ | 1,22-Docosanediol | CHRNA4   | 80.882  |
| SQ | 1,22-Docosanediol | KCNJ3    | 80.882  |
| SQ | 1,22-Docosanediol | GABRE    | 80.882  |
| SQ | 1,22-Docosanediol | GABRP    | 80.882  |
| SQ | 1,22-Docosanediol | GABRB2   | 80.882  |
| SQ | 1,22-Docosanediol | GABRQ    | 80.882  |
| SQ | 1,22-Docosanediol | GRIN3A   | 80.882  |
| SQ | 1,22-Docosanediol | HTR3E    | 80.882  |
| SQ | 1,22-Docosanediol | CHRFAM7A | 80.882  |
| SQ | 1,22-Docosanediol | GLRA1    | 80.882  |
| SQ | 1,22-Docosanediol | FOXL2    | 55.444  |

|    |                   |          |        |
|----|-------------------|----------|--------|
| SQ | 1,22-Docosanediol | ABAT     | 48     |
| SQ | 1,22-Docosanediol | SCN5A    | 48     |
| SQ | 1,22-Docosanediol | HDAC9    | 48     |
| SQ | 1,22-Docosanediol | SRD5A2   | 48     |
| SQ | 1,22-Docosanediol | HDAC2    | 48     |
| SQ | 1,22-Docosanediol | UTS2     | 22.373 |
| SQ | 1,22-Docosanediol | ADORA2A  | 22.373 |
| SQ | 1,22-Docosanediol | CNR2     | 22.373 |
| SQ | 1,22-Docosanediol | SLC44A4  | 22.373 |
| SQ | 1,22-Docosanediol | TBR1     | 22.373 |
| SQ | 1,22-Docosanediol | AOC1     | 22.373 |
| SQ | 1,22-Docosanediol | HCRT     | 22.373 |
| SQ | 1,22-Docosanediol | EZR      | 22.373 |
| SQ | 1,22-Docosanediol | SLC9A6   | 22.373 |
| SQ | 1,22-Docosanediol | GLRA4    | 22.373 |
| SQ | 1,22-Docosanediol | NRP1     | 22.373 |
| SQ | 1,22-Docosanediol | PLCB1    | 22.373 |
| SQ | 1,22-Docosanediol | CALCA    | 22.373 |
| SQ | 1,22-Docosanediol | ATP8B1   | 22.373 |
| SQ | Ginsenoside       | VDR      | 80.882 |
| SQ | Ginsenoside       | GPBAR1   | 22.373 |
| SQ | Ginsenoside       | TCF3     | 22.373 |
| SQ | Ginsenoside       | S100G    | 22.373 |
| SQ | Ginsenoside       | GC       | 55.444 |
| SQ | Ginsenoside       | MED1     | 22.373 |
| SQ | Ginsenoside       | BAX      | 22.373 |
| SQ | Ginsenoside       | IRX5     | 22.373 |
| SQ | Ginsenoside       | ESR1     | 48     |
| SQ | Ginsenoside       | CALB1    | 22.373 |
| SQ | Ginsenoside       | KL       | 22.373 |
| SQ | Ginsenoside       | RXRA     | 22.373 |
| SQ | Ginsenoside       | PGR      | 48     |
| SQ | Ginsenoside       | FGF23    | 22.373 |
| SQ | Ginsenoside       | PML      | 22.373 |
| SQ | Ginsenoside       | NR1H4    | 22.373 |
| SQ | Ginsenoside       | CYP27B1  | 48     |
| SQ | Ginsenoside       | WNT4     | 22.373 |
| SQ | Ginsenoside       | B4GALT1  | 22.373 |
| SQ | (-)-Dicentrine    | HTR2A    | 48     |
| SQ | (-)-Dicentrine    | HTR1D    | 48     |
| SQ | (-)-Dicentrine    | CALY     | 48     |
| SQ | (-)-Dicentrine    | CYBA     | 23     |
| SQ | (-)-Dicentrine    | NCF4     | 23     |
| SQ | (-)-Dicentrine    | NCF2     | 23     |
| SQ | (-)-Dicentrine    | SLC6A4   | 23     |
| SQ | (-)-Dicentrine    | CHRFAM7A | 23     |
| SQ | (-)-Dicentrine    | CTSG     | 22.373 |
| SQ | (-)-Dicentrine    | WLS      | 22.373 |
| SQ | (-)-Dicentrine    | HTR2B    | 48     |
| SQ | (-)-Dicentrine    | DRD2     | 48     |
| SQ | (-)-Dicentrine    | DRD3     | 48     |

|    |                                             |          |         |
|----|---------------------------------------------|----------|---------|
| SQ | (-)-Dicentrine                              | CHRNA4   | 23      |
| SQ | (-)-Dicentrine                              | CHRNA7   | 23      |
| SQ | (-)-Dicentrine                              | OPRK1    | 23      |
| SQ | (-)-Dicentrine                              | OPRM1    | 23      |
| SQ | (-)-Dicentrine                              | CHRNB4   | 23      |
| SQ | (-)-Dicentrine                              | SLC18A1  | 22.373  |
| SQ | (-)-Dicentrine                              | CHRNA9   | 22.373  |
| SQ | (-)-Dicentrine                              | ADRA2A   | 48      |
| SQ | (-)-Dicentrine                              | DRD4     | 48      |
| SQ | (-)-Dicentrine                              | DRD5     | 48      |
| SQ | (-)-Dicentrine                              | RAC2     | 23      |
| SQ | (-)-Dicentrine                              | CYBB     | 23      |
| SQ | (-)-Dicentrine                              | CHRNA3   | 23      |
| SQ | (-)-Dicentrine                              | CHRNA2   | 23      |
| SQ | (-)-Dicentrine                              | SLC6A2   | 23      |
| SQ | (-)-Dicentrine                              | CEND1    | 22.373  |
| SQ | (-)-Dicentrine                              | HTR1B    | 48      |
| SQ | (-)-Dicentrine                              | HTR1A    | 48      |
| SQ | (-)-Dicentrine                              | DRD1     | 48      |
| SQ | (-)-Dicentrine                              | RAC1     | 23      |
| SQ | (-)-Dicentrine                              | NCF1     | 23      |
| SQ | (-)-Dicentrine                              | RAC3     | 23      |
| SQ | (-)-Dicentrine                              | PGRMC1   | 23      |
| SQ | (-)-Dicentrine                              | TLR4     | 22.373  |
| SQ | (-)-Dicentrine                              | SLC22A1  | 22.373  |
| SQ | (-)-Dicentrine                              | HTR2C    | 48      |
| SQ | (-)-Dicentrine                              | ADRA2C   | 48      |
| SQ | (-)-Dicentrine                              | ADRA2B   | 48      |
| SQ | (-)-Dicentrine                              | OPRD1    | 23      |
| SQ | (-)-Dicentrine                              | SIGMAR1  | 23      |
| SQ | (-)-Dicentrine                              | CHRNB2   | 23      |
| SQ | (-)-Dicentrine                              | GRIN3A   | 23      |
| SQ | (-)-Dicentrine                              | ELANE    | 22.373  |
| SQ | (-)-Dicentrine                              | ADRA1B   | 22.373  |
| SQ | Notoginsenoside R4                          | ATP1A1   | 48      |
| SQ | (-)-2d,4d,6d,8d-Tetramethyl Undecanoic Acid | AKR1D1   | 686     |
| SQ | (-)-2d,4d,6d,8d-Tetramethyl Undecanoic Acid | ABAT     | 122.778 |
| SQ | (-)-2d,4d,6d,8d-Tetramethyl Undecanoic Acid | COX5B    | 122.778 |
| SQ | (-)-2d,4d,6d,8d-Tetramethyl Undecanoic Acid | SCN7A    | 122.778 |
| SQ | (-)-2d,4d,6d,8d-Tetramethyl Undecanoic Acid | COX5A    | 122.778 |
| SQ | (-)-2d,4d,6d,8d-Tetramethyl Undecanoic Acid | COX4I1   | 122.778 |
| SQ | (-)-2d,4d,6d,8d-Tetramethyl Undecanoic Acid | SCN4A    | 122.778 |
| SQ | (-)-2d,4d,6d,8d-Tetramethyl Undecanoic Acid | CES1     | 122.778 |
| SQ | (-)-2d,4d,6d,8d-Tetramethyl Undecanoic Acid | COX2     | 122.778 |
| SQ | (-)-2d,4d,6d,8d-Tetramethyl Undecanoic Acid | SUCLG2   | 80.882  |
| SQ | (-)-2d,4d,6d,8d-Tetramethyl Undecanoic Acid | SLC25A10 | 80.882  |
| SQ | (-)-2d,4d,6d,8d-Tetramethyl Undecanoic Acid | SUCNR1   | 80.882  |
| SQ | (-)-2d,4d,6d,8d-Tetramethyl Undecanoic Acid | OXCT1    | 80.882  |
| SQ | (-)-2d,4d,6d,8d-Tetramethyl Undecanoic Acid | SDHA     | 80.882  |
| SQ | (-)-2d,4d,6d,8d-Tetramethyl Undecanoic Acid | DCT      | 55.444  |
| SQ | (-)-2d,4d,6d,8d-Tetramethyl Undecanoic Acid | JMJD6    | 55.444  |



|    |                                             |          |         |
|----|---------------------------------------------|----------|---------|
| SQ | (-)-2d,4d,6d,8d-Tetramethyl Undecanoic Acid | HSD17B11 | 55.444  |
| SQ | (-)-2d,4d,6d,8d-Tetramethyl Undecanoic Acid | P4HB     | 55.444  |
| SQ | (-)-2d,4d,6d,8d-Tetramethyl Undecanoic Acid | GRIN3B   | 48      |
| SQ | (-)-2d,4d,6d,8d-Tetramethyl Undecanoic Acid | CACNA1B  | 48      |
| SQ | (-)-2d,4d,6d,8d-Tetramethyl Undecanoic Acid | GRIN3A   | 48      |
| SQ | (-)-2d,4d,6d,8d-Tetramethyl Undecanoic Acid | GRIN1    | 48      |
| SQ | (-)-2d,4d,6d,8d-Tetramethyl Undecanoic Acid | SIRT1    | 22.373  |
| SQ | (-)-2d,4d,6d,8d-Tetramethyl Undecanoic Acid | SIX1     | 22.373  |
| SQ | (-)-2d,4d,6d,8d-Tetramethyl Undecanoic Acid | OSBPL8   | 22.373  |
| SQ | (-)-2d,4d,6d,8d-Tetramethyl Undecanoic Acid | UBE2B    | 22.373  |
| SQ | (-)-2d,4d,6d,8d-Tetramethyl Undecanoic Acid | STIM2    | 22.373  |
| SQ | (-)-2d,4d,6d,8d-Tetramethyl Undecanoic Acid | COLGALT1 | 22.373  |
| SQ | (-)-2d,4d,6d,8d-Tetramethyl Undecanoic Acid | ARID1A   | 22.373  |
| SQ | (-)-2d,4d,6d,8d-Tetramethyl Undecanoic Acid | ACOT4    | 22.373  |
| SQ | (-)-2d,4d,6d,8d-Tetramethyl Undecanoic Acid | SLC25A12 | 22.373  |
| SQ | (-)-2d,4d,6d,8d-Tetramethyl Undecanoic Acid | CDH11    | 22.373  |
| SQ | (-)-2d,4d,6d,8d-Tetramethyl Undecanoic Acid | BDKRB2   | 22.373  |
| SQ | (-)-2d,4d,6d,8d-Tetramethyl Undecanoic Acid | SMAD7    | 22.373  |
| SQ | (-)-2d,4d,6d,8d-Tetramethyl Undecanoic Acid | WNT10B   | 22.373  |
| SQ | (-)-2d,4d,6d,8d-Tetramethyl Undecanoic Acid | STAR     | 22.373  |
| SQ | (-)-2d,4d,6d,8d-Tetramethyl Undecanoic Acid | CAMK2D   | 22.373  |
| SQ | (-)-2d,4d,6d,8d-Tetramethyl Undecanoic Acid | HTT      | 22.373  |
| SQ | (-)-2d,4d,6d,8d-Tetramethyl Undecanoic Acid | TST      | 22.373  |
| SQ | (-)-2d,4d,6d,8d-Tetramethyl Undecanoic Acid | TMEM110  | 22.373  |
| SQ | (-)-2d,4d,6d,8d-Tetramethyl Undecanoic Acid | EPHA4    | 22.373  |
| SQ | (-)-2d,4d,6d,8d-Tetramethyl Undecanoic Acid | EDA      | 22.373  |
| SQ | (-)-2d,4d,6d,8d-Tetramethyl Undecanoic Acid | KCNQ1    | 22.373  |
| SQ | (-)-2d,4d,6d,8d-Tetramethyl Undecanoic Acid | UGT1A1   | 22.373  |
| SQ | (-)-2d,4d,6d,8d-Tetramethyl Undecanoic Acid | PLOD2    | 22.373  |
| SQ | (-)-2d,4d,6d,8d-Tetramethyl Undecanoic Acid | SLC25A1  | 22.373  |
| SQ | (-)-2d,4d,6d,8d-Tetramethyl Undecanoic Acid | TYR      | 686     |
| SQ | (-)-2d,4d,6d,8d-Tetramethyl Undecanoic Acid | SCN1A    | 122.778 |
| SQ | (-)-2d,4d,6d,8d-Tetramethyl Undecanoic Acid | COX7C    | 122.778 |
| SQ | (-)-2d,4d,6d,8d-Tetramethyl Undecanoic Acid | SCN5A    | 122.778 |
| SQ | (-)-2d,4d,6d,8d-Tetramethyl Undecanoic Acid | COX3     | 122.778 |
| SQ | (-)-2d,4d,6d,8d-Tetramethyl Undecanoic Acid | HDAC9    | 122.778 |
| SQ | (-)-2d,4d,6d,8d-Tetramethyl Undecanoic Acid | SCN4B    | 122.778 |
| SQ | (-)-2d,4d,6d,8d-Tetramethyl Undecanoic Acid | ACADSB   | 122.778 |
| SQ | (-)-2d,4d,6d,8d-Tetramethyl Undecanoic Acid | OGDH     | 122.778 |
| SQ | (-)-2d,4d,6d,8d-Tetramethyl Undecanoic Acid | SLC13A2  | 80.882  |
| SQ | (-)-2d,4d,6d,8d-Tetramethyl Undecanoic Acid | P3H3     | 80.882  |
| SQ | (-)-2d,4d,6d,8d-Tetramethyl Undecanoic Acid | SLC13A3  | 80.882  |
| SQ | (-)-2d,4d,6d,8d-Tetramethyl Undecanoic Acid | PLOD3    | 80.882  |
| SQ | (-)-2d,4d,6d,8d-Tetramethyl Undecanoic Acid | P4HA2    | 80.882  |
| SQ | (-)-2d,4d,6d,8d-Tetramethyl Undecanoic Acid | AKR1C3   | 55.444  |
| SQ | (-)-2d,4d,6d,8d-Tetramethyl Undecanoic Acid | SLC13A4  | 55.444  |
| SQ | (-)-2d,4d,6d,8d-Tetramethyl Undecanoic Acid | TYRP1    | 55.444  |
| SQ | (-)-2d,4d,6d,8d-Tetramethyl Undecanoic Acid | CACNA2D1 | 48      |
| SQ | (-)-2d,4d,6d,8d-Tetramethyl Undecanoic Acid | CACNA2D2 | 48      |
| SQ | (-)-2d,4d,6d,8d-Tetramethyl Undecanoic Acid | GRIN2C   | 48      |
| SQ | (-)-2d,4d,6d,8d-Tetramethyl Undecanoic Acid | SLC7A1   | 48      |

|    |                                             |          |         |
|----|---------------------------------------------|----------|---------|
| SQ | (-)-2d,4d,6d,8d-Tetramethyl Undecanoic Acid | HDAC1    | 23      |
| SQ | (-)-2d,4d,6d,8d-Tetramethyl Undecanoic Acid | SHMT1    | 22.373  |
| SQ | (-)-2d,4d,6d,8d-Tetramethyl Undecanoic Acid | BDH1     | 22.373  |
| SQ | (-)-2d,4d,6d,8d-Tetramethyl Undecanoic Acid | SPI1     | 22.373  |
| SQ | (-)-2d,4d,6d,8d-Tetramethyl Undecanoic Acid | CYP1A2   | 22.373  |
| SQ | (-)-2d,4d,6d,8d-Tetramethyl Undecanoic Acid | PKD2     | 22.373  |
| SQ | (-)-2d,4d,6d,8d-Tetramethyl Undecanoic Acid | NEDD4    | 22.373  |
| SQ | (-)-2d,4d,6d,8d-Tetramethyl Undecanoic Acid | EGLN2    | 22.373  |
| SQ | (-)-2d,4d,6d,8d-Tetramethyl Undecanoic Acid | PHGDH    | 22.373  |
| SQ | (-)-2d,4d,6d,8d-Tetramethyl Undecanoic Acid | YBX3     | 22.373  |
| SQ | (-)-2d,4d,6d,8d-Tetramethyl Undecanoic Acid | CACNA1D  | 22.373  |
| SQ | (-)-2d,4d,6d,8d-Tetramethyl Undecanoic Acid | PRPH     | 22.373  |
| SQ | (-)-2d,4d,6d,8d-Tetramethyl Undecanoic Acid | PRDM8    | 22.373  |
| SQ | (-)-2d,4d,6d,8d-Tetramethyl Undecanoic Acid | OGFOD1   | 22.373  |
| SQ | (-)-2d,4d,6d,8d-Tetramethyl Undecanoic Acid | DLST     | 22.373  |
| SQ | (-)-2d,4d,6d,8d-Tetramethyl Undecanoic Acid | AP3D1    | 22.373  |
| SQ | (-)-2d,4d,6d,8d-Tetramethyl Undecanoic Acid | IL10     | 22.373  |
| SQ | (-)-2d,4d,6d,8d-Tetramethyl Undecanoic Acid | SLC1A6   | 22.373  |
| SQ | (-)-2d,4d,6d,8d-Tetramethyl Undecanoic Acid | CDC42    | 22.373  |
| SQ | (-)-2d,4d,6d,8d-Tetramethyl Undecanoic Acid | OCA2     | 22.373  |
| SQ | (-)-2d,4d,6d,8d-Tetramethyl Undecanoic Acid | HACL1    | 22.373  |
| SQ | (-)-2d,4d,6d,8d-Tetramethyl Undecanoic Acid | CASQ2    | 22.373  |
| SQ | (-)-2d,4d,6d,8d-Tetramethyl Undecanoic Acid | DLD      | 22.373  |
| SQ | (-)-2d,4d,6d,8d-Tetramethyl Undecanoic Acid | CYP1A1   | 22.373  |
| SQ | (-)-2d,4d,6d,8d-Tetramethyl Undecanoic Acid | SRD5A2   | 686     |
| SQ | (-)-2d,4d,6d,8d-Tetramethyl Undecanoic Acid | ESRRG    | 122.778 |
| SQ | (-)-2d,4d,6d,8d-Tetramethyl Undecanoic Acid | COX1     | 122.778 |
| SQ | (-)-2d,4d,6d,8d-Tetramethyl Undecanoic Acid | SCN10A   | 122.778 |
| SQ | (-)-2d,4d,6d,8d-Tetramethyl Undecanoic Acid | AR       | 122.778 |
| SQ | (-)-2d,4d,6d,8d-Tetramethyl Undecanoic Acid | PLA2G1B  | 122.778 |
| SQ | (-)-2d,4d,6d,8d-Tetramethyl Undecanoic Acid | ADH1C    | 122.778 |
| SQ | (-)-2d,4d,6d,8d-Tetramethyl Undecanoic Acid | SCN8A    | 122.778 |
| SQ | (-)-2d,4d,6d,8d-Tetramethyl Undecanoic Acid | HDAC2    | 122.778 |
| SQ | (-)-2d,4d,6d,8d-Tetramethyl Undecanoic Acid | SLC13A1  | 80.882  |
| SQ | (-)-2d,4d,6d,8d-Tetramethyl Undecanoic Acid | OXCT2    | 80.882  |
| SQ | (-)-2d,4d,6d,8d-Tetramethyl Undecanoic Acid | ASPH     | 80.882  |
| SQ | (-)-2d,4d,6d,8d-Tetramethyl Undecanoic Acid | P4HA1    | 80.882  |
| SQ | (-)-2d,4d,6d,8d-Tetramethyl Undecanoic Acid | SUCLA2   | 80.882  |
| SQ | (-)-2d,4d,6d,8d-Tetramethyl Undecanoic Acid | CRTAP    | 55.444  |
| SQ | (-)-2d,4d,6d,8d-Tetramethyl Undecanoic Acid | SDHAF2   | 55.444  |
| SQ | (-)-2d,4d,6d,8d-Tetramethyl Undecanoic Acid | HIF1AN   | 55.444  |
| SQ | (-)-2d,4d,6d,8d-Tetramethyl Undecanoic Acid | PLAT     | 48      |
| SQ | (-)-2d,4d,6d,8d-Tetramethyl Undecanoic Acid | GRIN2A   | 48      |
| SQ | (-)-2d,4d,6d,8d-Tetramethyl Undecanoic Acid | GRIN2B   | 48      |
| SQ | (-)-2d,4d,6d,8d-Tetramethyl Undecanoic Acid | SLC7A4   | 48      |
| SQ | (-)-2d,4d,6d,8d-Tetramethyl Undecanoic Acid | GPD1L    | 22.373  |
| SQ | (-)-2d,4d,6d,8d-Tetramethyl Undecanoic Acid | SUGCT    | 22.373  |
| SQ | (-)-2d,4d,6d,8d-Tetramethyl Undecanoic Acid | COLGALT2 | 22.373  |
| SQ | (-)-2d,4d,6d,8d-Tetramethyl Undecanoic Acid | SUOX     | 22.373  |
| SQ | (-)-2d,4d,6d,8d-Tetramethyl Undecanoic Acid | CCL5     | 22.373  |
| SQ | (-)-2d,4d,6d,8d-Tetramethyl Undecanoic Acid | ALDH9A1  | 22.373  |

|    |                                             |          |         |
|----|---------------------------------------------|----------|---------|
| SQ | (-)-2d,4d,6d,8d-Tetramethyl Undecanoic Acid | CYP11A1  | 22.373  |
| SQ | (-)-2d,4d,6d,8d-Tetramethyl Undecanoic Acid | ACAT1    | 22.373  |
| SQ | (-)-2d,4d,6d,8d-Tetramethyl Undecanoic Acid | PNLIPRP2 | 22.373  |
| SQ | (-)-2d,4d,6d,8d-Tetramethyl Undecanoic Acid | 8-Mar    | 22.373  |
| SQ | (-)-2d,4d,6d,8d-Tetramethyl Undecanoic Acid | DDC      | 22.373  |
| SQ | (-)-2d,4d,6d,8d-Tetramethyl Undecanoic Acid | BCKDHB   | 22.373  |
| SQ | (-)-2d,4d,6d,8d-Tetramethyl Undecanoic Acid | UROD     | 22.373  |
| SQ | (-)-2d,4d,6d,8d-Tetramethyl Undecanoic Acid | SLC38A7  | 22.373  |
| SQ | (-)-2d,4d,6d,8d-Tetramethyl Undecanoic Acid | PF4      | 22.373  |
| SQ | (-)-2d,4d,6d,8d-Tetramethyl Undecanoic Acid | MYO5A    | 22.373  |
| SQ | (-)-2d,4d,6d,8d-Tetramethyl Undecanoic Acid | EGLN3    | 22.373  |
| SQ | (-)-2d,4d,6d,8d-Tetramethyl Undecanoic Acid | NPPA     | 22.373  |
| SQ | (-)-2d,4d,6d,8d-Tetramethyl Undecanoic Acid | ARHGEF2  | 22.373  |
| SQ | (-)-2d,4d,6d,8d-Tetramethyl Undecanoic Acid | HSD17B8  | 22.373  |
| SQ | (-)-2d,4d,6d,8d-Tetramethyl Undecanoic Acid | RYR2     | 22.373  |
| SQ | (-)-2d,4d,6d,8d-Tetramethyl Undecanoic Acid | GJA5     | 22.373  |
| SQ | (-)-2d,4d,6d,8d-Tetramethyl Undecanoic Acid | GNAS     | 22.373  |
| SQ | (-)-2d,4d,6d,8d-Tetramethyl Undecanoic Acid | SULT2A1  | 22.373  |
| SQ | (-)-2d,4d,6d,8d-Tetramethyl Undecanoic Acid | SCN11A   | 122.778 |
| SQ | (-)-2d,4d,6d,8d-Tetramethyl Undecanoic Acid | SCN3B    | 122.778 |
| SQ | (-)-2d,4d,6d,8d-Tetramethyl Undecanoic Acid | SCN3A    | 122.778 |
| SQ | (-)-2d,4d,6d,8d-Tetramethyl Undecanoic Acid | ALDH5A1  | 122.778 |
| SQ | (-)-2d,4d,6d,8d-Tetramethyl Undecanoic Acid | COX7A1   | 122.778 |
| SQ | (-)-2d,4d,6d,8d-Tetramethyl Undecanoic Acid | COX6A2   | 122.778 |
| SQ | (-)-2d,4d,6d,8d-Tetramethyl Undecanoic Acid | COX6B1   | 122.778 |
| SQ | (-)-2d,4d,6d,8d-Tetramethyl Undecanoic Acid | COX7B    | 122.778 |
| SQ | (-)-2d,4d,6d,8d-Tetramethyl Undecanoic Acid | COX8A    | 122.778 |
| SQ | (-)-2d,4d,6d,8d-Tetramethyl Undecanoic Acid | SUCLG1   | 80.882  |
| SQ | (-)-2d,4d,6d,8d-Tetramethyl Undecanoic Acid | TMLHE    | 80.882  |
| SQ | (-)-2d,4d,6d,8d-Tetramethyl Undecanoic Acid | BBOX1    | 80.882  |
| SQ | (-)-2d,4d,6d,8d-Tetramethyl Undecanoic Acid | SDHC     | 80.882  |
| SQ | (-)-2d,4d,6d,8d-Tetramethyl Undecanoic Acid | SDHD     | 80.882  |
| SQ | (-)-2d,4d,6d,8d-Tetramethyl Undecanoic Acid | SLIT2    | 55.444  |
| SQ | (-)-2d,4d,6d,8d-Tetramethyl Undecanoic Acid | SLC1A3   | 55.444  |
| SQ | (-)-2d,4d,6d,8d-Tetramethyl Undecanoic Acid | UROS     | 55.444  |
| SQ | (-)-2d,4d,6d,8d-Tetramethyl Undecanoic Acid | SLC7A2   | 48      |
| SQ | (-)-2d,4d,6d,8d-Tetramethyl Undecanoic Acid | TOP1     | 48      |
| SQ | (-)-2d,4d,6d,8d-Tetramethyl Undecanoic Acid | SLC7A3   | 48      |
| SQ | (-)-2d,4d,6d,8d-Tetramethyl Undecanoic Acid | GRIN2D   | 48      |
| SQ | (-)-2d,4d,6d,8d-Tetramethyl Undecanoic Acid | SRD5A1   | 22.373  |
| SQ | (-)-2d,4d,6d,8d-Tetramethyl Undecanoic Acid | ACSS2    | 22.373  |
| SQ | (-)-2d,4d,6d,8d-Tetramethyl Undecanoic Acid | SIX4     | 22.373  |
| SQ | (-)-2d,4d,6d,8d-Tetramethyl Undecanoic Acid | CCL2     | 22.373  |
| SQ | (-)-2d,4d,6d,8d-Tetramethyl Undecanoic Acid | ANK2     | 22.373  |
| SQ | (-)-2d,4d,6d,8d-Tetramethyl Undecanoic Acid | TH       | 22.373  |
| SQ | (-)-2d,4d,6d,8d-Tetramethyl Undecanoic Acid | DHODH    | 22.373  |
| SQ | (-)-2d,4d,6d,8d-Tetramethyl Undecanoic Acid | GALC     | 22.373  |
| SQ | (-)-2d,4d,6d,8d-Tetramethyl Undecanoic Acid | CYP39A1  | 22.373  |
| SQ | (-)-2d,4d,6d,8d-Tetramethyl Undecanoic Acid | STIM1    | 22.373  |
| SQ | (-)-2d,4d,6d,8d-Tetramethyl Undecanoic Acid | DHTKD1   | 22.373  |
| SQ | (-)-2d,4d,6d,8d-Tetramethyl Undecanoic Acid | KCNE5    | 22.373  |

|    |                                             |          |         |
|----|---------------------------------------------|----------|---------|
| SQ | (-)-2d,4d,6d,8d-Tetramethyl Undecanoic Acid | UGT8     | 22.373  |
| SQ | (-)-2d,4d,6d,8d-Tetramethyl Undecanoic Acid | ACSS1    | 22.373  |
| SQ | (-)-2d,4d,6d,8d-Tetramethyl Undecanoic Acid | CRACR2A  | 22.373  |
| SQ | (-)-2d,4d,6d,8d-Tetramethyl Undecanoic Acid | ILVBL    | 22.373  |
| SQ | (-)-2d,4d,6d,8d-Tetramethyl Undecanoic Acid | OGDHL    | 22.373  |
| SQ | (-)-2d,4d,6d,8d-Tetramethyl Undecanoic Acid | ACADM    | 22.373  |
| SQ | (-)-2d,4d,6d,8d-Tetramethyl Undecanoic Acid | EGLN1    | 22.373  |
| SQ | (-)-2d,4d,6d,8d-Tetramethyl Undecanoic Acid | CTNNB1   | 22.373  |
| SQ | (-)-2d,4d,6d,8d-Tetramethyl Undecanoic Acid | HAP1     | 22.373  |
| SQ | (-)-2d,4d,6d,8d-Tetramethyl Undecanoic Acid | DHRS9    | 22.373  |
| SQ | (-)-2d,4d,6d,8d-Tetramethyl Undecanoic Acid | SLC25A13 | 22.373  |
| SQ | (-)-2d,4d,6d,8d-Tetramethyl Undecanoic Acid | NFX1     | 22.373  |
| SQ | (-)-2d,4d,6d,8d-Tetramethyl Undecanoic Acid | SCN2B    | 122.778 |
| SQ | (-)-2d,4d,6d,8d-Tetramethyl Undecanoic Acid | COX6C    | 122.778 |
| SQ | (-)-2d,4d,6d,8d-Tetramethyl Undecanoic Acid | AKR1C2   | 122.778 |
| SQ | (-)-2d,4d,6d,8d-Tetramethyl Undecanoic Acid | SCN2A    | 122.778 |
| SQ | (-)-2d,4d,6d,8d-Tetramethyl Undecanoic Acid | FECH     | 122.778 |
| SQ | (-)-2d,4d,6d,8d-Tetramethyl Undecanoic Acid | SCN9A    | 122.778 |
| SQ | (-)-2d,4d,6d,8d-Tetramethyl Undecanoic Acid | FABP6    | 122.778 |
| SQ | (-)-2d,4d,6d,8d-Tetramethyl Undecanoic Acid | SCN1B    | 122.778 |
| SQ | (-)-2d,4d,6d,8d-Tetramethyl Undecanoic Acid | NR1H4    | 122.778 |
| SQ | (-)-2d,4d,6d,8d-Tetramethyl Undecanoic Acid | HSD17B6  | 80.882  |
| SQ | (-)-2d,4d,6d,8d-Tetramethyl Undecanoic Acid | PLOD1    | 80.882  |
| SQ | (-)-2d,4d,6d,8d-Tetramethyl Undecanoic Acid | SDHB     | 80.882  |
| SQ | (-)-2d,4d,6d,8d-Tetramethyl Undecanoic Acid | P3H2     | 80.882  |
| SQ | (-)-2d,4d,6d,8d-Tetramethyl Undecanoic Acid | P3H1     | 80.882  |
| SQ | (-)-2d,4d,6d,8d-Tetramethyl Undecanoic Acid | ACO2     | 55.444  |
| SQ | (-)-2d,4d,6d,8d-Tetramethyl Undecanoic Acid | SALL1    | 55.444  |
| SQ | (-)-2d,4d,6d,8d-Tetramethyl Undecanoic Acid | SLC13A5  | 55.444  |
| SQ | (-)-2d,4d,6d,8d-Tetramethyl Undecanoic Acid | CACNA1A  | 48      |
| SQ | (-)-2d,4d,6d,8d-Tetramethyl Undecanoic Acid | PLG      | 48      |
| SQ | (-)-2d,4d,6d,8d-Tetramethyl Undecanoic Acid | KARS     | 48      |
| SQ | (-)-2d,4d,6d,8d-Tetramethyl Undecanoic Acid | ADORA1   | 48      |
| SQ | (-)-2d,4d,6d,8d-Tetramethyl Undecanoic Acid | FBXO45   | 22.373  |
| SQ | (-)-2d,4d,6d,8d-Tetramethyl Undecanoic Acid | ARV1     | 22.373  |
| SQ | (-)-2d,4d,6d,8d-Tetramethyl Undecanoic Acid | MRPS36   | 22.373  |
| SQ | (-)-2d,4d,6d,8d-Tetramethyl Undecanoic Acid | BCKDK    | 22.373  |
| SQ | (-)-2d,4d,6d,8d-Tetramethyl Undecanoic Acid | HSD17B2  | 22.373  |
| SQ | (-)-2d,4d,6d,8d-Tetramethyl Undecanoic Acid | EPO      | 22.373  |
| SQ | (-)-2d,4d,6d,8d-Tetramethyl Undecanoic Acid | CLN3     | 22.373  |
| SQ | (-)-2d,4d,6d,8d-Tetramethyl Undecanoic Acid | PLCG2    | 22.373  |
| SQ | (-)-2d,4d,6d,8d-Tetramethyl Undecanoic Acid | BCKDHA   | 22.373  |
| SQ | (-)-2d,4d,6d,8d-Tetramethyl Undecanoic Acid | GAL3ST1  | 22.373  |
| SQ | (-)-2d,4d,6d,8d-Tetramethyl Undecanoic Acid | NEDD4L   | 22.373  |
| SQ | (-)-2d,4d,6d,8d-Tetramethyl Undecanoic Acid | SRD5A3   | 22.373  |
| SQ | (-)-2d,4d,6d,8d-Tetramethyl Undecanoic Acid | ETHE1    | 22.373  |
| SQ | (-)-2d,4d,6d,8d-Tetramethyl Undecanoic Acid | CYP4B1   | 22.373  |
| SQ | (-)-2d,4d,6d,8d-Tetramethyl Undecanoic Acid | HSD17B1  | 22.373  |
| SQ | (-)-2d,4d,6d,8d-Tetramethyl Undecanoic Acid | CAV3     | 22.373  |
| SQ | (-)-2d,4d,6d,8d-Tetramethyl Undecanoic Acid | KCNA5    | 22.373  |
| SQ | (-)-2d,4d,6d,8d-Tetramethyl Undecanoic Acid | SQRDL    | 22.373  |

|    |                                             |         |         |
|----|---------------------------------------------|---------|---------|
| SQ | (-)-2d,4d,6d,8d-Tetramethyl Undecanoic Acid | ETFDH   | 22.373  |
| SQ | (-)-2d,4d,6d,8d-Tetramethyl Undecanoic Acid | P4HA3   | 22.373  |
| SQ | (-)-2d,4d,6d,8d-Tetramethyl Undecanoic Acid | PCSK9   | 22.373  |
| SQ | (-)-2d,4d,6d,8d-Tetramethyl Undecanoic Acid | GPR143  | 22.373  |
| SQ | (-)-2d,4d,6d,8d-Tetramethyl Undecanoic Acid | SFXN5   | 22.373  |
| SQ | (-)-2d,4d,6d,8d-Tetramethyl Undecanoic Acid | DBT     | 22.373  |
| SQ | Sandaracopimarinol                          | ESR1    | 122.778 |
| SQ | Sandaracopimarinol                          | RDH13   | 80.882  |
| SQ | Sandaracopimarinol                          | DHRS4   | 80.882  |
| SQ | Sandaracopimarinol                          | RDH8    | 80.882  |
| SQ | Sandaracopimarinol                          | RS1     | 55.444  |
| SQ | Sandaracopimarinol                          | FADS2   | 48      |
| SQ | Sandaracopimarinol                          | CTSH    | 22.373  |
| SQ | Sandaracopimarinol                          | DHRS2   | 22.373  |
| SQ | Sandaracopimarinol                          | GATA3   | 22.373  |
| SQ | Sandaracopimarinol                          | CRYM    | 22.373  |
| SQ | Sandaracopimarinol                          | CYP1A1  | 22.373  |
| SQ | Sandaracopimarinol                          | PGR     | 122.778 |
| SQ | Sandaracopimarinol                          | DHRS3   | 80.882  |
| SQ | Sandaracopimarinol                          | RBP1    | 80.882  |
| SQ | Sandaracopimarinol                          | LRAT    | 80.882  |
| SQ | Sandaracopimarinol                          | SLC8A1  | 48      |
| SQ | Sandaracopimarinol                          | FADS1   | 48      |
| SQ | Sandaracopimarinol                          | OPN4    | 22.373  |
| SQ | Sandaracopimarinol                          | HSD17B7 | 22.373  |
| SQ | Sandaracopimarinol                          | ASCL1   | 22.373  |
| SQ | Sandaracopimarinol                          | TSPO    | 22.373  |
| SQ | Sandaracopimarinol                          | RDH11   | 80.882  |
| SQ | Sandaracopimarinol                          | RDH5    | 80.882  |
| SQ | Sandaracopimarinol                          | ALDH1A1 | 80.882  |
| SQ | Sandaracopimarinol                          | ALDH1A2 | 80.882  |
| SQ | Sandaracopimarinol                          | TRPV1   | 48      |
| SQ | Sandaracopimarinol                          | PTGS1   | 48      |
| SQ | Sandaracopimarinol                          | RDH10   | 22.373  |
| SQ | Sandaracopimarinol                          | THRA    | 22.373  |
| SQ | Sandaracopimarinol                          | DLX5    | 22.373  |
| SQ | Sandaracopimarinol                          | OPN5    | 22.373  |
| SQ | Sandaracopimarinol                          | RBP3    | 80.882  |
| SQ | Sandaracopimarinol                          | ALDH1A3 | 80.882  |
| SQ | Sandaracopimarinol                          | RLBP1   | 80.882  |
| SQ | Sandaracopimarinol                          | ALDH3A1 | 55.444  |
| SQ | Sandaracopimarinol                          | AR      | 48      |
| SQ | Sandaracopimarinol                          | PTGS2   | 48      |
| SQ | Sandaracopimarinol                          | ALDH8A1 | 22.373  |
| SQ | Sandaracopimarinol                          | PAX2    | 22.373  |
| SQ | Sandaracopimarinol                          | RET     | 22.373  |
| SQ | Sandaracopimarinol                          | DHRS9   | 22.373  |
| SQ | Sandaracopimarinol                          | RETSAT  | 80.882  |
| SQ | Sandaracopimarinol                          | RDH12   | 80.882  |
| SQ | Sandaracopimarinol                          | RDH14   | 80.882  |
| SQ | Sandaracopimarinol                          | RHO     | 55.444  |

|    |                    |           |        |
|----|--------------------|-----------|--------|
| SQ | Sandaracopimarinol | NR3C1     | 48     |
| SQ | Sandaracopimarinol | ELOVL4    | 48     |
| SQ | Sandaracopimarinol | SHBG      | 22.373 |
| SQ | Sandaracopimarinol | CBR3      | 22.373 |
| SQ | Sandaracopimarinol | THRB      | 22.373 |
| SQ | Sandaracopimarinol | CBR1      | 22.373 |
| SQ | Ginsenoside Rb1    | ATP1A1    | 48     |
| SQ | Dicapryl Phthalate | PLAT      | 80.882 |
| SQ | Dicapryl Phthalate | BCL2      | 80.882 |
| SQ | Dicapryl Phthalate | PTGS2     | 80.882 |
| SQ | Dicapryl Phthalate | IL13      | 55.444 |
| SQ | Dicapryl Phthalate | PDXP      | 22.373 |
| SQ | Dicapryl Phthalate | NOX1      | 22.373 |
| SQ | Dicapryl Phthalate | FNDC5     | 22.373 |
| SQ | Dicapryl Phthalate | OSBPL8    | 22.373 |
| SQ | Dicapryl Phthalate | DNAJC3    | 22.373 |
| SQ | Dicapryl Phthalate | ITGB3     | 22.373 |
| SQ | Dicapryl Phthalate | ADAMTS9   | 22.373 |
| SQ | Dicapryl Phthalate | PNPLA2    | 22.373 |
| SQ | Dicapryl Phthalate | CLN3      | 22.373 |
| SQ | Dicapryl Phthalate | ITGAV     | 22.373 |
| SQ | Dicapryl Phthalate | PTPN2     | 22.373 |
| SQ | Dicapryl Phthalate | AVP       | 22.373 |
| SQ | Dicapryl Phthalate | TCAF2     | 22.373 |
| SQ | Dicapryl Phthalate | NGF       | 22.373 |
| SQ | Dicapryl Phthalate | CDKN2A    | 22.373 |
| SQ | Dicapryl Phthalate | CDC20     | 22.373 |
| SQ | Dicapryl Phthalate | RET       | 22.373 |
| SQ | Dicapryl Phthalate | IFI6      | 22.373 |
| SQ | Dicapryl Phthalate | MECOM     | 22.373 |
| SQ | Dicapryl Phthalate | PPARA     | 22.373 |
| SQ | Dicapryl Phthalate | S100A9    | 22.373 |
| SQ | Dicapryl Phthalate | NR1H4     | 22.373 |
| SQ | Dicapryl Phthalate | HCAR2     | 80.882 |
| SQ | Dicapryl Phthalate | FABP2     | 80.882 |
| SQ | Dicapryl Phthalate | NNMT      | 80.882 |
| SQ | Dicapryl Phthalate | C1QTNF3   | 55.444 |
| SQ | Dicapryl Phthalate | NDRG2     | 22.373 |
| SQ | Dicapryl Phthalate | NAMPT     | 22.373 |
| SQ | Dicapryl Phthalate | RAB11FIP5 | 22.373 |
| SQ | Dicapryl Phthalate | CA7       | 22.373 |
| SQ | Dicapryl Phthalate | ANO9      | 22.373 |
| SQ | Dicapryl Phthalate | TP53      | 22.373 |
| SQ | Dicapryl Phthalate | SLC26A6   | 22.373 |
| SQ | Dicapryl Phthalate | MYF6      | 22.373 |
| SQ | Dicapryl Phthalate | PNP       | 22.373 |
| SQ | Dicapryl Phthalate | SCRIB     | 22.373 |
| SQ | Dicapryl Phthalate | S100A8    | 22.373 |
| SQ | Dicapryl Phthalate | BAX       | 22.373 |
| SQ | Dicapryl Phthalate | BDKRB2    | 22.373 |
| SQ | Dicapryl Phthalate | RAB11FIP3 | 22.373 |

|    |                    |           |        |
|----|--------------------|-----------|--------|
| SQ | Dicapryl Phthalate | ALOX15B   | 22.373 |
| SQ | Dicapryl Phthalate | NUDT12    | 22.373 |
| SQ | Dicapryl Phthalate | BCL2L1    | 22.373 |
| SQ | Dicapryl Phthalate | ABCA1     | 22.373 |
| SQ | Dicapryl Phthalate | ABHD5     | 22.373 |
| SQ | Dicapryl Phthalate | CA2       | 22.373 |
| SQ | Dicapryl Phthalate | RAB11FIP1 | 22.373 |
| SQ | Dicapryl Phthalate | ABCG1     | 22.373 |
| SQ | Dicapryl Phthalate | THBD      | 80.882 |
| SQ | Dicapryl Phthalate | CFTR      | 80.882 |
| SQ | Dicapryl Phthalate | APOA2     | 55.444 |
| SQ | Dicapryl Phthalate | KCNE2     | 55.444 |
| SQ | Dicapryl Phthalate | ASPDH     | 22.373 |
| SQ | Dicapryl Phthalate | RGCC      | 22.373 |
| SQ | Dicapryl Phthalate | NR1H3     | 22.373 |
| SQ | Dicapryl Phthalate | MYF5      | 22.373 |
| SQ | Dicapryl Phthalate | SHOX2     | 22.373 |
| SQ | Dicapryl Phthalate | PRKDC     | 22.373 |
| SQ | Dicapryl Phthalate | FXYD1     | 22.373 |
| SQ | Dicapryl Phthalate | MEF2C     | 22.373 |
| SQ | Dicapryl Phthalate | AURKA     | 22.373 |
| SQ | Dicapryl Phthalate | MYOD1     | 22.373 |
| SQ | Dicapryl Phthalate | ALOX5AP   | 22.373 |
| SQ | Dicapryl Phthalate | IFNG      | 22.373 |
| SQ | Dicapryl Phthalate | NR1H2     | 22.373 |
| SQ | Dicapryl Phthalate | ANAPC2    | 22.373 |
| SQ | Dicapryl Phthalate | CAV3      | 22.373 |
| SQ | Dicapryl Phthalate | DNAJA3    | 22.373 |
| SQ | Dicapryl Phthalate | COL1A1    | 22.373 |
| SQ | Dicapryl Phthalate | KMO       | 22.373 |
| SQ | Dicapryl Phthalate | SNCA      | 22.373 |
| SQ | Dicapryl Phthalate | ALOX15    | 22.373 |
| SQ | Dicapryl Phthalate | KYNU      | 22.373 |
| SQ | Dicapryl Phthalate | PRDM16    | 22.373 |
| SQ | Dicapryl Phthalate | PPARG     | 80.882 |
| SQ | Dicapryl Phthalate | HCAR3     | 80.882 |
| SQ | Dicapryl Phthalate | TCAF1     | 55.444 |
| SQ | Dicapryl Phthalate | ANXA1     | 55.444 |
| SQ | Dicapryl Phthalate | ATOH1     | 22.373 |
| SQ | Dicapryl Phthalate | SIRT1     | 22.373 |
| SQ | Dicapryl Phthalate | ADAMTS20  | 22.373 |
| SQ | Dicapryl Phthalate | ACMSD     | 22.373 |
| SQ | Dicapryl Phthalate | KITLG     | 22.373 |
| SQ | Dicapryl Phthalate | METRNL    | 22.373 |
| SQ | Dicapryl Phthalate | STX3      | 22.373 |
| SQ | Dicapryl Phthalate | PTGIS     | 22.373 |
| SQ | Dicapryl Phthalate | HEG1      | 22.373 |
| SQ | Dicapryl Phthalate | MCL1      | 22.373 |
| SQ | Dicapryl Phthalate | TCF3      | 22.373 |
| SQ | Dicapryl Phthalate | SEC24B    | 22.373 |
| SQ | Dicapryl Phthalate | NEUROD2   | 22.373 |

|    |                    |          |        |
|----|--------------------|----------|--------|
| SQ | Dicapryl Phthalate | HAAO     | 22.373 |
| SQ | Dicapryl Phthalate | HTT      | 22.373 |
| SQ | Dicapryl Phthalate | ZEB2     | 22.373 |
| SQ | Dicapryl Phthalate | BDNF     | 22.373 |
| SQ | Dicapryl Phthalate | NAPRT    | 22.373 |
| SQ | Dicapryl Phthalate | ADIPOQ   | 22.373 |
| SQ | Dicapryl Phthalate | PAWR     | 22.373 |
| SQ | Dicapryl Phthalate | FABP3    | 22.373 |
| SQ | Dicapryl Phthalate | RAG2     | 22.373 |
| SQ | Dicapryl Phthalate | QPRT     | 80.882 |
| SQ | Dicapryl Phthalate | PTGS1    | 80.882 |
| SQ | Dicapryl Phthalate | IL1B     | 55.444 |
| SQ | Dicapryl Phthalate | SERPINB7 | 55.444 |
| SQ | Dicapryl Phthalate | SLC4A7   | 22.373 |
| SQ | Dicapryl Phthalate | NGFR     | 22.373 |
| SQ | Dicapryl Phthalate | SIRT2    | 22.373 |
| SQ | Dicapryl Phthalate | AVPRIA   | 22.373 |
| SQ | Dicapryl Phthalate | FASLG    | 22.373 |
| SQ | Dicapryl Phthalate | MAPK9    | 22.373 |
| SQ | Dicapryl Phthalate | OXER1    | 22.373 |
| SQ | Dicapryl Phthalate | RUNX1    | 22.373 |
| SQ | Dicapryl Phthalate | HSH2D    | 22.373 |
| SQ | Dicapryl Phthalate | CNTF     | 22.373 |
| SQ | Dicapryl Phthalate | SRC      | 22.373 |
| SQ | Dicapryl Phthalate | SLC6A4   | 22.373 |
| SQ | Dicapryl Phthalate | INS      | 22.373 |
| SQ | Dicapryl Phthalate | WNT11    | 22.373 |
| SQ | Dicapryl Phthalate | SLC26A3  | 22.373 |
| SQ | Dicapryl Phthalate | IL6      | 22.373 |
| SQ | Dicapryl Phthalate | NR1D1    | 22.373 |
| SQ | Dicapryl Phthalate | SLC34A1  | 22.373 |
| SQ | Dicapryl Phthalate | CPLX2    | 22.373 |
| SQ | Dicapryl Phthalate | MYOG     | 22.373 |
| SQ | Dicapryl Phthalate | SEC61B   | 22.373 |
| SQ | Dicapryl Phthalate | CCM2L    | 22.373 |
| SQ | Delta-Elemene      | KCND1    | 80.882 |
| SQ | Delta-Elemene      | GAMT     | 80.882 |
| SQ | Delta-Elemene      | CAT      | 80.882 |
| SQ | Delta-Elemene      | KCNC1    | 80.882 |
| SQ | Delta-Elemene      | KCND2    | 80.882 |
| SQ | Delta-Elemene      | KCND3    | 80.882 |
| SQ | Delta-Elemene      | KCNQ1    | 55.444 |
| SQ | Delta-Elemene      | ADH7     | 22.373 |
| SQ | Delta-Elemene      | AQP8     | 22.373 |
| SQ | Delta-Elemene      | ASPA     | 22.373 |
| SQ | Delta-Elemene      | APOE     | 22.373 |
| SQ | Delta-Elemene      | MC4R     | 22.373 |
| SQ | Delta-Elemene      | SCN5A    | 22.373 |
| SQ | Delta-Elemene      | KCNIP2   | 22.373 |
| SQ | Delta-Elemene      | SCGB1A1  | 22.373 |
| SQ | Delta-Elemene      | CACNA1D  | 22.373 |



|    |             |         |        |
|----|-------------|---------|--------|
| SQ | Delta-Emene | PPARD   | 22.373 |
| SQ | Delta-Emene | ALDH3B1 | 22.373 |
| SQ | Delta-Emene | ALDH3B2 | 22.373 |
| SQ | Delta-Emene | GJA5    | 22.373 |
| SQ | Delta-Emene | KCNA3   | 80.882 |
| SQ | Delta-Emene | KCNC3   | 80.882 |
| SQ | Delta-Emene | KCNB1   | 80.882 |
| SQ | Delta-Emene | ADH1C   | 80.882 |
| SQ | Delta-Emene | ALDH2   | 80.882 |
| SQ | Delta-Emene | GUCY1B3 | 55.444 |
| SQ | Delta-Emene | ESR1    | 48     |
| SQ | Delta-Emene | NFIB    | 22.373 |
| SQ | Delta-Emene | ARX     | 22.373 |
| SQ | Delta-Emene | NRXN1   | 22.373 |
| SQ | Delta-Emene | SOX15   | 22.373 |
| SQ | Delta-Emene | IL1B    | 22.373 |
| SQ | Delta-Emene | SCN10A  | 22.373 |
| SQ | Delta-Emene | GPX7    | 22.373 |
| SQ | Delta-Emene | OXTR    | 22.373 |
| SQ | Delta-Emene | RAPGEF2 | 22.373 |
| SQ | Delta-Emene | NKX2-1  | 22.373 |
| SQ | Delta-Emene | NPPA    | 22.373 |
| SQ | Delta-Emene | RNASE2  | 22.373 |
| SQ | Delta-Emene | FAS     | 22.373 |
| SQ | Delta-Emene | PRKAB1  | 80.882 |
| SQ | Delta-Emene | KCNA1   | 80.882 |
| SQ | Delta-Emene | ADH1B   | 80.882 |
| SQ | Delta-Emene | KCNB2   | 80.882 |
| SQ | Delta-Emene | KCNA4   | 80.882 |
| SQ | Delta-Emene | GATM    | 55.444 |
| SQ | Delta-Emene | PGR     | 48     |
| SQ | Delta-Emene | CYGB    | 22.373 |
| SQ | Delta-Emene | IGF1    | 22.373 |
| SQ | Delta-Emene | EDN1    | 22.373 |
| SQ | Delta-Emene | CNTNAP4 | 22.373 |
| SQ | Delta-Emene | GRIN2A  | 22.373 |
| SQ | Delta-Emene | SPARC   | 22.373 |
| SQ | Delta-Emene | CRLF1   | 22.373 |
| SQ | Delta-Emene | ALDH1B1 | 22.373 |
| SQ | Delta-Emene | DARS    | 22.373 |
| SQ | Delta-Emene | MIP     | 22.373 |
| SQ | Delta-Emene | STX1A   | 22.373 |
| SQ | Delta-Emene | NRXN2   | 22.373 |
| SQ | Delta-Emene | DAB2IP  | 22.373 |
| SQ | Delta-Emene | ADH1A   | 80.882 |
| SQ | Delta-Emene | KCNA2   | 80.882 |
| SQ | Delta-Emene | DLG4    | 80.882 |
| SQ | Delta-Emene | KCNA5   | 80.882 |
| SQ | Delta-Emene | KCNA7   | 80.882 |
| SQ | Delta-Emene | KCNK4   | 55.444 |
| SQ | Delta-Emene | FBP1    | 22.373 |

|    |              |         |        |
|----|--------------|---------|--------|
| SQ | Delta-Elmene | NRXN3   | 22.373 |
| SQ | Delta-Elmene | SHANK3  | 22.373 |
| SQ | Delta-Elmene | OXT     | 22.373 |
| SQ | Delta-Elmene | RNASE4  | 22.373 |
| SQ | Delta-Elmene | SLC17A7 | 22.373 |
| SQ | Delta-Elmene | SORCS3  | 22.373 |
| SQ | Delta-Elmene | FADD    | 22.373 |
| SQ | Delta-Elmene | LEP     | 22.373 |
| SQ | Delta-Elmene | ANK3    | 22.373 |
| SQ | Delta-Elmene | RYR3    | 22.373 |
| SQ | Delta-Elmene | PAXBP1  | 22.373 |
| SQ | Delta-Elmene | ADORA1  | 22.373 |
| SQ | Delta-Elmene | CYP2E1  | 22.373 |
| SQ | Delta-Elmene | KCNA10  | 80.882 |
| SQ | Delta-Elmene | TPO     | 80.882 |
| SQ | Delta-Elmene | KCNC2   | 80.882 |
| SQ | Delta-Elmene | RNASE1  | 80.882 |
| SQ | Delta-Elmene | KCNA6   | 80.882 |
| SQ | Delta-Elmene | IYD     | 55.444 |
| SQ | Delta-Elmene | DGKI    | 22.373 |
| SQ | Delta-Elmene | LRRC4B  | 22.373 |
| SQ | Delta-Elmene | ACY3    | 22.373 |
| SQ | Delta-Elmene | MAGI2   | 22.373 |
| SQ | Delta-Elmene | RAB3A   | 22.373 |
| SQ | Delta-Elmene | CYP11A1 | 22.373 |
| SQ | Delta-Elmene | RNASE8  | 22.373 |
| SQ | Delta-Elmene | SNTG2   | 22.373 |
| SQ | Delta-Elmene | NLGN1   | 22.373 |
| SQ | Delta-Elmene | KCNE5   | 22.373 |
| SQ | Delta-Elmene | ZPR1    | 22.373 |
| SQ | Delta-Elmene | PAX7    | 22.373 |
| SQ | Delta-Elmene | ADH4    | 22.373 |
| SQ | Delta-Elmene | ACY1    | 22.373 |
| SQ | Cyperene     | KCND1   | 80.882 |
| SQ | Cyperene     | GAMT    | 80.882 |
| SQ | Cyperene     | CAT     | 80.882 |
| SQ | Cyperene     | KCNC1   | 80.882 |
| SQ | Cyperene     | KCND2   | 80.882 |
| SQ | Cyperene     | KCND3   | 80.882 |
| SQ | Cyperene     | KCNQ1   | 55.444 |
| SQ | Cyperene     | CYGB    | 22.373 |
| SQ | Cyperene     | IGF1    | 22.373 |
| SQ | Cyperene     | EDN1    | 22.373 |
| SQ | Cyperene     | CNTNAP4 | 22.373 |
| SQ | Cyperene     | GRIN2A  | 22.373 |
| SQ | Cyperene     | SPARC   | 22.373 |
| SQ | Cyperene     | CRLF1   | 22.373 |
| SQ | Cyperene     | ALDH1B1 | 22.373 |
| SQ | Cyperene     | DARS    | 22.373 |
| SQ | Cyperene     | MIP     | 22.373 |
| SQ | Cyperene     | STX1A   | 22.373 |

|    |          |         |        |
|----|----------|---------|--------|
| SQ | Cyperene | NRXN2   | 22.373 |
| SQ | Cyperene | DAB2IP  | 22.373 |
| SQ | Cyperene | KCNA3   | 80.882 |
| SQ | Cyperene | KCNC3   | 80.882 |
| SQ | Cyperene | KCNB1   | 80.882 |
| SQ | Cyperene | ADH1C   | 80.882 |
| SQ | Cyperene | ALDH2   | 80.882 |
| SQ | Cyperene | GUCY1B3 | 55.444 |
| SQ | Cyperene | FBP1    | 22.373 |
| SQ | Cyperene | NRXN3   | 22.373 |
| SQ | Cyperene | SHANK3  | 22.373 |
| SQ | Cyperene | OXT     | 22.373 |
| SQ | Cyperene | RNASE4  | 22.373 |
| SQ | Cyperene | SLC17A7 | 22.373 |
| SQ | Cyperene | SORCS3  | 22.373 |
| SQ | Cyperene | FADD    | 22.373 |
| SQ | Cyperene | LEP     | 22.373 |
| SQ | Cyperene | ANK3    | 22.373 |
| SQ | Cyperene | RYR3    | 22.373 |
| SQ | Cyperene | PAXBP1  | 22.373 |
| SQ | Cyperene | ADORA1  | 22.373 |
| SQ | Cyperene | CYP2E1  | 22.373 |
| SQ | Cyperene | PRKAB1  | 80.882 |
| SQ | Cyperene | KCNA1   | 80.882 |
| SQ | Cyperene | ADH1B   | 80.882 |
| SQ | Cyperene | KCNB2   | 80.882 |
| SQ | Cyperene | KCNA4   | 80.882 |
| SQ | Cyperene | GATM    | 55.444 |
| SQ | Cyperene | DGKI    | 22.373 |
| SQ | Cyperene | LRR4B   | 22.373 |
| SQ | Cyperene | ACY3    | 22.373 |
| SQ | Cyperene | MAGI2   | 22.373 |
| SQ | Cyperene | RAB3A   | 22.373 |
| SQ | Cyperene | CYP11A1 | 22.373 |
| SQ | Cyperene | RNASE8  | 22.373 |
| SQ | Cyperene | SNTG2   | 22.373 |
| SQ | Cyperene | NLGN1   | 22.373 |
| SQ | Cyperene | KCNE5   | 22.373 |
| SQ | Cyperene | ZPR1    | 22.373 |
| SQ | Cyperene | PAX7    | 22.373 |
| SQ | Cyperene | ADH4    | 22.373 |
| SQ | Cyperene | ACY1    | 22.373 |
| SQ | Cyperene | ADH1A   | 80.882 |
| SQ | Cyperene | KCNA2   | 80.882 |
| SQ | Cyperene | DLG4    | 80.882 |
| SQ | Cyperene | KCNA5   | 80.882 |
| SQ | Cyperene | KCNA7   | 80.882 |
| SQ | Cyperene | KCNK4   | 55.444 |
| SQ | Cyperene | ADH7    | 22.373 |
| SQ | Cyperene | AQP8    | 22.373 |
| SQ | Cyperene | ASPA    | 22.373 |

|    |                        |         |        |
|----|------------------------|---------|--------|
| SQ | Cyperene               | APOE    | 22.373 |
| SQ | Cyperene               | MC4R    | 22.373 |
| SQ | Cyperene               | SCN5A   | 22.373 |
| SQ | Cyperene               | KCNIP2  | 22.373 |
| SQ | Cyperene               | SCGB1A1 | 22.373 |
| SQ | Cyperene               | CACNA1D | 22.373 |
| SQ | Cyperene               | PPARD   | 22.373 |
| SQ | Cyperene               | ALDH3B1 | 22.373 |
| SQ | Cyperene               | ALDH3B2 | 22.373 |
| SQ | Cyperene               | GJA5    | 22.373 |
| SQ | Cyperene               | KCNA10  | 80.882 |
| SQ | Cyperene               | TPO     | 80.882 |
| SQ | Cyperene               | KCNC2   | 80.882 |
| SQ | Cyperene               | RNASE1  | 80.882 |
| SQ | Cyperene               | KCNA6   | 80.882 |
| SQ | Cyperene               | IYD     | 55.444 |
| SQ | Cyperene               | NFIB    | 22.373 |
| SQ | Cyperene               | ARX     | 22.373 |
| SQ | Cyperene               | NRXN1   | 22.373 |
| SQ | Cyperene               | SOX15   | 22.373 |
| SQ | Cyperene               | IL1B    | 22.373 |
| SQ | Cyperene               | SCN10A  | 22.373 |
| SQ | Cyperene               | GPX7    | 22.373 |
| SQ | Cyperene               | OXTR    | 22.373 |
| SQ | Cyperene               | RAPGEF2 | 22.373 |
| SQ | Cyperene               | NKX2-1  | 22.373 |
| SQ | Cyperene               | NPPA    | 22.373 |
| SQ | Cyperene               | RNASE2  | 22.373 |
| SQ | Cyperene               | FAS     | 22.373 |
| SQ | (-)-Trifara-9,14-Diene | KCND1   | 80.882 |
| SQ | (-)-Trifara-9,14-Diene | GAMT    | 80.882 |
| SQ | (-)-Trifara-9,14-Diene | CAT     | 80.882 |
| SQ | (-)-Trifara-9,14-Diene | KCNC1   | 80.882 |
| SQ | (-)-Trifara-9,14-Diene | KCND2   | 80.882 |
| SQ | (-)-Trifara-9,14-Diene | KCND3   | 80.882 |
| SQ | (-)-Trifara-9,14-Diene | KCNQ1   | 55.444 |
| SQ | (-)-Trifara-9,14-Diene | CYGB    | 22.373 |
| SQ | (-)-Trifara-9,14-Diene | IGF1    | 22.373 |
| SQ | (-)-Trifara-9,14-Diene | EDN1    | 22.373 |
| SQ | (-)-Trifara-9,14-Diene | CNTNAP4 | 22.373 |
| SQ | (-)-Trifara-9,14-Diene | GRIN2A  | 22.373 |
| SQ | (-)-Trifara-9,14-Diene | SPARC   | 22.373 |
| SQ | (-)-Trifara-9,14-Diene | CRLF1   | 22.373 |
| SQ | (-)-Trifara-9,14-Diene | ALDH1B1 | 22.373 |
| SQ | (-)-Trifara-9,14-Diene | DARS    | 22.373 |
| SQ | (-)-Trifara-9,14-Diene | MIP     | 22.373 |
| SQ | (-)-Trifara-9,14-Diene | STX1A   | 22.373 |
| SQ | (-)-Trifara-9,14-Diene | NRXN2   | 22.373 |
| SQ | (-)-Trifara-9,14-Diene | DAB2IP  | 22.373 |
| SQ | (-)-Trifara-9,14-Diene | KCNA3   | 80.882 |
| SQ | (-)-Trifara-9,14-Diene | KCNC3   | 80.882 |

|    |                        |         |        |
|----|------------------------|---------|--------|
| SQ | (-)-Trifara-9,14-Diene | KCNB1   | 80.882 |
| SQ | (-)-Trifara-9,14-Diene | ADH1C   | 80.882 |
| SQ | (-)-Trifara-9,14-Diene | ALDH2   | 80.882 |
| SQ | (-)-Trifara-9,14-Diene | GUCY1B3 | 55.444 |
| SQ | (-)-Trifara-9,14-Diene | FBP1    | 22.373 |
| SQ | (-)-Trifara-9,14-Diene | NRXN3   | 22.373 |
| SQ | (-)-Trifara-9,14-Diene | SHANK3  | 22.373 |
| SQ | (-)-Trifara-9,14-Diene | OXT     | 22.373 |
| SQ | (-)-Trifara-9,14-Diene | RNASE4  | 22.373 |
| SQ | (-)-Trifara-9,14-Diene | SLC17A7 | 22.373 |
| SQ | (-)-Trifara-9,14-Diene | SORCS3  | 22.373 |
| SQ | (-)-Trifara-9,14-Diene | FADD    | 22.373 |
| SQ | (-)-Trifara-9,14-Diene | LEP     | 22.373 |
| SQ | (-)-Trifara-9,14-Diene | ANK3    | 22.373 |
| SQ | (-)-Trifara-9,14-Diene | RYR3    | 22.373 |
| SQ | (-)-Trifara-9,14-Diene | PAXBP1  | 22.373 |
| SQ | (-)-Trifara-9,14-Diene | ADORA1  | 22.373 |
| SQ | (-)-Trifara-9,14-Diene | CYP2E1  | 22.373 |
| SQ | (-)-Trifara-9,14-Diene | PRKAB1  | 80.882 |
| SQ | (-)-Trifara-9,14-Diene | KCNA1   | 80.882 |
| SQ | (-)-Trifara-9,14-Diene | ADH1B   | 80.882 |
| SQ | (-)-Trifara-9,14-Diene | KCNB2   | 80.882 |
| SQ | (-)-Trifara-9,14-Diene | KCNA4   | 80.882 |
| SQ | (-)-Trifara-9,14-Diene | GATM    | 55.444 |
| SQ | (-)-Trifara-9,14-Diene | DGKI    | 22.373 |
| SQ | (-)-Trifara-9,14-Diene | LRRC4B  | 22.373 |
| SQ | (-)-Trifara-9,14-Diene | ACY3    | 22.373 |
| SQ | (-)-Trifara-9,14-Diene | MAGI2   | 22.373 |
| SQ | (-)-Trifara-9,14-Diene | RAB3A   | 22.373 |
| SQ | (-)-Trifara-9,14-Diene | CYP11A1 | 22.373 |
| SQ | (-)-Trifara-9,14-Diene | RNASE8  | 22.373 |
| SQ | (-)-Trifara-9,14-Diene | SNTG2   | 22.373 |
| SQ | (-)-Trifara-9,14-Diene | NLGN1   | 22.373 |
| SQ | (-)-Trifara-9,14-Diene | KCNE5   | 22.373 |
| SQ | (-)-Trifara-9,14-Diene | ZPR1    | 22.373 |
| SQ | (-)-Trifara-9,14-Diene | PAX7    | 22.373 |
| SQ | (-)-Trifara-9,14-Diene | ADH4    | 22.373 |
| SQ | (-)-Trifara-9,14-Diene | ACY1    | 22.373 |
| SQ | (-)-Trifara-9,14-Diene | ADH1A   | 80.882 |
| SQ | (-)-Trifara-9,14-Diene | KCNA2   | 80.882 |
| SQ | (-)-Trifara-9,14-Diene | DLG4    | 80.882 |
| SQ | (-)-Trifara-9,14-Diene | KCNA5   | 80.882 |
| SQ | (-)-Trifara-9,14-Diene | KCNA7   | 80.882 |
| SQ | (-)-Trifara-9,14-Diene | KCNK4   | 55.444 |
| SQ | (-)-Trifara-9,14-Diene | ADH7    | 22.373 |
| SQ | (-)-Trifara-9,14-Diene | AQP8    | 22.373 |
| SQ | (-)-Trifara-9,14-Diene | ASPA    | 22.373 |
| SQ | (-)-Trifara-9,14-Diene | APOE    | 22.373 |
| SQ | (-)-Trifara-9,14-Diene | MC4R    | 22.373 |
| SQ | (-)-Trifara-9,14-Diene | SCN5A   | 22.373 |
| SQ | (-)-Trifara-9,14-Diene | KCNIP2  | 22.373 |

|    |                        |         |        |
|----|------------------------|---------|--------|
| SQ | (-)-Trifara-9,14-Diene | SCGB1A1 | 22.373 |
| SQ | (-)-Trifara-9,14-Diene | CACNA1D | 22.373 |
| SQ | (-)-Trifara-9,14-Diene | PPARD   | 22.373 |
| SQ | (-)-Trifara-9,14-Diene | ALDH3B1 | 22.373 |
| SQ | (-)-Trifara-9,14-Diene | ALDH3B2 | 22.373 |
| SQ | (-)-Trifara-9,14-Diene | GJA5    | 22.373 |
| SQ | (-)-Trifara-9,14-Diene | KCNA10  | 80.882 |
| SQ | (-)-Trifara-9,14-Diene | TPO     | 80.882 |
| SQ | (-)-Trifara-9,14-Diene | KCNC2   | 80.882 |
| SQ | (-)-Trifara-9,14-Diene | RNASE1  | 80.882 |
| SQ | (-)-Trifara-9,14-Diene | KCNA6   | 80.882 |
| SQ | (-)-Trifara-9,14-Diene | IYD     | 55.444 |
| SQ | (-)-Trifara-9,14-Diene | NFIB    | 22.373 |
| SQ | (-)-Trifara-9,14-Diene | ARX     | 22.373 |
| SQ | (-)-Trifara-9,14-Diene | NRXN1   | 22.373 |
| SQ | (-)-Trifara-9,14-Diene | SOX15   | 22.373 |
| SQ | (-)-Trifara-9,14-Diene | IL1B    | 22.373 |
| SQ | (-)-Trifara-9,14-Diene | SCN10A  | 22.373 |
| SQ | (-)-Trifara-9,14-Diene | GPX7    | 22.373 |
| SQ | (-)-Trifara-9,14-Diene | OXTR    | 22.373 |
| SQ | (-)-Trifara-9,14-Diene | RAPGEF2 | 22.373 |
| SQ | (-)-Trifara-9,14-Diene | NKX2-1  | 22.373 |
| SQ | (-)-Trifara-9,14-Diene | NPPA    | 22.373 |
| SQ | (-)-Trifara-9,14-Diene | RNASE2  | 22.373 |
| SQ | (-)-Trifara-9,14-Diene | FAS     | 22.373 |
| SQ | Cycloeucaenol          | VDR     | 80.882 |
| SQ | Cycloeucaenol          | PGR     | 48     |
| SQ | Cycloeucaenol          | SNAI2   | 22.373 |
| SQ | Cycloeucaenol          | FGF23   | 22.373 |
| SQ | Cycloeucaenol          | BAX     | 22.373 |
| SQ | Cycloeucaenol          | S100G   | 22.373 |
| SQ | Cycloeucaenol          | NR1H4   | 22.373 |
| SQ | Cycloeucaenol          | CYP27B1 | 80.882 |
| SQ | Cycloeucaenol          | NFKB1   | 22.373 |
| SQ | Cycloeucaenol          | MED1    | 22.373 |
| SQ | Cycloeucaenol          | GFI1    | 22.373 |
| SQ | Cycloeucaenol          | KL      | 22.373 |
| SQ | Cycloeucaenol          | CYP27A1 | 22.373 |
| SQ | Cycloeucaenol          | TRIM24  | 22.373 |
| SQ | Cycloeucaenol          | GC      | 55.444 |
| SQ | Cycloeucaenol          | AKR1C3  | 22.373 |
| SQ | Cycloeucaenol          | SNAI1   | 22.373 |
| SQ | Cycloeucaenol          | LANCL2  | 22.373 |
| SQ | Cycloeucaenol          | CYP2R1  | 22.373 |
| SQ | Cycloeucaenol          | KANK2   | 22.373 |
| SQ | Cycloeucaenol          | SNW1    | 55.444 |
| SQ | Cycloeucaenol          | CYP24A1 | 22.373 |
| SQ | Cycloeucaenol          | CYP3A4  | 22.373 |
| SQ | Cycloeucaenol          | WNT4    | 22.373 |
| SQ | Cycloeucaenol          | PML     | 22.373 |
| SQ | Cycloeucaenol          | IRX5    | 22.373 |

|    |                                     |         |         |
|----|-------------------------------------|---------|---------|
| SQ | Cycloeucaenol                       | ESR1    | 48      |
| SQ | Cycloeucaenol                       | GPBAR1  | 22.373  |
| SQ | Cycloeucaenol                       | CALB1   | 22.373  |
| SQ | Cycloeucaenol                       | TCF3    | 22.373  |
| SQ | Cycloeucaenol                       | B4GALT1 | 22.373  |
| SQ | Cycloeucaenol                       | RXRA    | 22.373  |
| SQ | 4,4'-Diketo-3-Hydroxy-Beta-Carotene | AR      | 80.882  |
| SQ | 4,4'-Diketo-3-Hydroxy-Beta-Carotene | RARRES1 | 48      |
| SQ | 4,4'-Diketo-3-Hydroxy-Beta-Carotene | RXRG    | 48      |
| SQ | 4,4'-Diketo-3-Hydroxy-Beta-Carotene | RXRA    | 48      |
| SQ | 4,4'-Diketo-3-Hydroxy-Beta-Carotene | PPP3R2  | 23      |
| SQ | 4,4'-Diketo-3-Hydroxy-Beta-Carotene | NOX1    | 22.373  |
| SQ | 4,4'-Diketo-3-Hydroxy-Beta-Carotene | ATP1B1  | 22.373  |
| SQ | 4,4'-Diketo-3-Hydroxy-Beta-Carotene | FXD2    | 22.373  |
| SQ | 4,4'-Diketo-3-Hydroxy-Beta-Carotene | AKAP13  | 22.373  |
| SQ | 4,4'-Diketo-3-Hydroxy-Beta-Carotene | NR3C1   | 80.882  |
| SQ | 4,4'-Diketo-3-Hydroxy-Beta-Carotene | NR0B1   | 48      |
| SQ | 4,4'-Diketo-3-Hydroxy-Beta-Carotene | ALDH1A1 | 48      |
| SQ | 4,4'-Diketo-3-Hydroxy-Beta-Carotene | ALDH1A2 | 48      |
| SQ | 4,4'-Diketo-3-Hydroxy-Beta-Carotene | PPIA    | 23      |
| SQ | 4,4'-Diketo-3-Hydroxy-Beta-Carotene | CREBRF  | 22.373  |
| SQ | 4,4'-Diketo-3-Hydroxy-Beta-Carotene | WNT4    | 22.373  |
| SQ | 4,4'-Diketo-3-Hydroxy-Beta-Carotene | TSPO    | 22.373  |
| SQ | 4,4'-Diketo-3-Hydroxy-Beta-Carotene | RAD51   | 22.373  |
| SQ | 4,4'-Diketo-3-Hydroxy-Beta-Carotene | ATP1A1  | 80.882  |
| SQ | 4,4'-Diketo-3-Hydroxy-Beta-Carotene | RARG    | 48      |
| SQ | 4,4'-Diketo-3-Hydroxy-Beta-Carotene | RARA    | 48      |
| SQ | 4,4'-Diketo-3-Hydroxy-Beta-Carotene | VDR     | 48      |
| SQ | 4,4'-Diketo-3-Hydroxy-Beta-Carotene | ATP1A2  | 23      |
| SQ | 4,4'-Diketo-3-Hydroxy-Beta-Carotene | NKX3-1  | 22.373  |
| SQ | 4,4'-Diketo-3-Hydroxy-Beta-Carotene | TGFB2   | 22.373  |
| SQ | 4,4'-Diketo-3-Hydroxy-Beta-Carotene | BMP5    | 22.373  |
| SQ | 4,4'-Diketo-3-Hydroxy-Beta-Carotene | REST    | 22.373  |
| SQ | 4,4'-Diketo-3-Hydroxy-Beta-Carotene | NOTCH2  | 55.444  |
| SQ | 4,4'-Diketo-3-Hydroxy-Beta-Carotene | PGR     | 48      |
| SQ | 4,4'-Diketo-3-Hydroxy-Beta-Carotene | ANXA1   | 48      |
| SQ | 4,4'-Diketo-3-Hydroxy-Beta-Carotene | CAMLG   | 23      |
| SQ | 4,4'-Diketo-3-Hydroxy-Beta-Carotene | PIF     | 23      |
| SQ | 4,4'-Diketo-3-Hydroxy-Beta-Carotene | BMP2    | 22.373  |
| SQ | 4,4'-Diketo-3-Hydroxy-Beta-Carotene | DKK3    | 22.373  |
| SQ | 4,4'-Diketo-3-Hydroxy-Beta-Carotene | PDE8B   | 22.373  |
| SQ | 4,4'-Diketo-3-Hydroxy-Beta-Carotene | RXRB    | 48      |
| SQ | 4,4'-Diketo-3-Hydroxy-Beta-Carotene | RARB    | 48      |
| SQ | 4,4'-Diketo-3-Hydroxy-Beta-Carotene | GPRC5A  | 48      |
| SQ | 4,4'-Diketo-3-Hydroxy-Beta-Carotene | ATP1A3  | 23      |
| SQ | 4,4'-Diketo-3-Hydroxy-Beta-Carotene | COL5A1  | 22.373  |
| SQ | 4,4'-Diketo-3-Hydroxy-Beta-Carotene | SHBG    | 22.373  |
| SQ | 4,4'-Diketo-3-Hydroxy-Beta-Carotene | NR1I3   | 22.373  |
| SQ | 4,4'-Diketo-3-Hydroxy-Beta-Carotene | S100A9  | 22.373  |
| SQ | Nonadecanoic Acid                   | AKR1D1  | 686     |
| SQ | Nonadecanoic Acid                   | ABAT    | 122.778 |

|    |                   |          |         |
|----|-------------------|----------|---------|
| SQ | Nonadecanoic Acid | COX5B    | 122.778 |
| SQ | Nonadecanoic Acid | SCN7A    | 122.778 |
| SQ | Nonadecanoic Acid | COX5A    | 122.778 |
| SQ | Nonadecanoic Acid | COX4I1   | 122.778 |
| SQ | Nonadecanoic Acid | SCN4A    | 122.778 |
| SQ | Nonadecanoic Acid | CES1     | 122.778 |
| SQ | Nonadecanoic Acid | COX2     | 122.778 |
| SQ | Nonadecanoic Acid | SUCLG2   | 80.882  |
| SQ | Nonadecanoic Acid | SLC25A10 | 80.882  |
| SQ | Nonadecanoic Acid | SUCNR1   | 80.882  |
| SQ | Nonadecanoic Acid | OXCT1    | 80.882  |
| SQ | Nonadecanoic Acid | SDHA     | 80.882  |
| SQ | Nonadecanoic Acid | DCT      | 55.444  |
| SQ | Nonadecanoic Acid | JMJD6    | 55.444  |
| SQ | Nonadecanoic Acid | HSD17B11 | 55.444  |
| SQ | Nonadecanoic Acid | P4HB     | 55.444  |
| SQ | Nonadecanoic Acid | GRIN3B   | 48      |
| SQ | Nonadecanoic Acid | CACNA1B  | 48      |
| SQ | Nonadecanoic Acid | GRIN3A   | 48      |
| SQ | Nonadecanoic Acid | GRIN1    | 48      |
| SQ | Nonadecanoic Acid | SIRT1    | 22.373  |
| SQ | Nonadecanoic Acid | SIX1     | 22.373  |
| SQ | Nonadecanoic Acid | OSBPL8   | 22.373  |
| SQ | Nonadecanoic Acid | UBE2B    | 22.373  |
| SQ | Nonadecanoic Acid | STIM2    | 22.373  |
| SQ | Nonadecanoic Acid | COLGALT1 | 22.373  |
| SQ | Nonadecanoic Acid | ARID1A   | 22.373  |
| SQ | Nonadecanoic Acid | ACOT4    | 22.373  |
| SQ | Nonadecanoic Acid | SLC25A12 | 22.373  |
| SQ | Nonadecanoic Acid | CDH11    | 22.373  |
| SQ | Nonadecanoic Acid | BDKRB2   | 22.373  |
| SQ | Nonadecanoic Acid | SMAD7    | 22.373  |
| SQ | Nonadecanoic Acid | WNT10B   | 22.373  |
| SQ | Nonadecanoic Acid | STAR     | 22.373  |
| SQ | Nonadecanoic Acid | CAMK2D   | 22.373  |
| SQ | Nonadecanoic Acid | HTT      | 22.373  |
| SQ | Nonadecanoic Acid | TST      | 22.373  |
| SQ | Nonadecanoic Acid | TMEM110  | 22.373  |
| SQ | Nonadecanoic Acid | EPHA4    | 22.373  |
| SQ | Nonadecanoic Acid | EDA      | 22.373  |
| SQ | Nonadecanoic Acid | KCNQ1    | 22.373  |
| SQ | Nonadecanoic Acid | UGT1A1   | 22.373  |
| SQ | Nonadecanoic Acid | PLOD2    | 22.373  |
| SQ | Nonadecanoic Acid | SLC25A1  | 22.373  |
| SQ | Nonadecanoic Acid | TYR      | 686     |
| SQ | Nonadecanoic Acid | SCN1A    | 122.778 |
| SQ | Nonadecanoic Acid | COX7C    | 122.778 |
| SQ | Nonadecanoic Acid | SCN5A    | 122.778 |
| SQ | Nonadecanoic Acid | COX3     | 122.778 |
| SQ | Nonadecanoic Acid | HDAC9    | 122.778 |
| SQ | Nonadecanoic Acid | SCN4B    | 122.778 |



|    |                   |          |         |
|----|-------------------|----------|---------|
| SQ | Nonadecanoic Acid | ACADSB   | 122.778 |
| SQ | Nonadecanoic Acid | OGDH     | 122.778 |
| SQ | Nonadecanoic Acid | SLC13A2  | 80.882  |
| SQ | Nonadecanoic Acid | P3H3     | 80.882  |
| SQ | Nonadecanoic Acid | SLC13A3  | 80.882  |
| SQ | Nonadecanoic Acid | PLOD3    | 80.882  |
| SQ | Nonadecanoic Acid | P4HA2    | 80.882  |
| SQ | Nonadecanoic Acid | AKR1C3   | 55.444  |
| SQ | Nonadecanoic Acid | SLC13A4  | 55.444  |
| SQ | Nonadecanoic Acid | TYRP1    | 55.444  |
| SQ | Nonadecanoic Acid | CACNA2D1 | 48      |
| SQ | Nonadecanoic Acid | CACNA2D2 | 48      |
| SQ | Nonadecanoic Acid | GRIN2C   | 48      |
| SQ | Nonadecanoic Acid | SLC7A1   | 48      |
| SQ | Nonadecanoic Acid | HDAC1    | 23      |
| SQ | Nonadecanoic Acid | SHMT1    | 22.373  |
| SQ | Nonadecanoic Acid | BDH1     | 22.373  |
| SQ | Nonadecanoic Acid | SPI1     | 22.373  |
| SQ | Nonadecanoic Acid | CYP1A2   | 22.373  |
| SQ | Nonadecanoic Acid | PKD2     | 22.373  |
| SQ | Nonadecanoic Acid | NEDD4    | 22.373  |
| SQ | Nonadecanoic Acid | EGLN2    | 22.373  |
| SQ | Nonadecanoic Acid | PHGDH    | 22.373  |
| SQ | Nonadecanoic Acid | YBX3     | 22.373  |
| SQ | Nonadecanoic Acid | CACNA1D  | 22.373  |
| SQ | Nonadecanoic Acid | PRPH     | 22.373  |
| SQ | Nonadecanoic Acid | PRDM8    | 22.373  |
| SQ | Nonadecanoic Acid | OGFOD1   | 22.373  |
| SQ | Nonadecanoic Acid | DLST     | 22.373  |
| SQ | Nonadecanoic Acid | AP3D1    | 22.373  |
| SQ | Nonadecanoic Acid | IL10     | 22.373  |
| SQ | Nonadecanoic Acid | SLC1A6   | 22.373  |
| SQ | Nonadecanoic Acid | CDC42    | 22.373  |
| SQ | Nonadecanoic Acid | OCA2     | 22.373  |
| SQ | Nonadecanoic Acid | HACL1    | 22.373  |
| SQ | Nonadecanoic Acid | CASQ2    | 22.373  |
| SQ | Nonadecanoic Acid | DLD      | 22.373  |
| SQ | Nonadecanoic Acid | CYP1A1   | 22.373  |
| SQ | Nonadecanoic Acid | SRD5A2   | 686     |
| SQ | Nonadecanoic Acid | ESRRG    | 122.778 |
| SQ | Nonadecanoic Acid | COX1     | 122.778 |
| SQ | Nonadecanoic Acid | SCN10A   | 122.778 |
| SQ | Nonadecanoic Acid | AR       | 122.778 |
| SQ | Nonadecanoic Acid | PLA2G1B  | 122.778 |
| SQ | Nonadecanoic Acid | ADH1C    | 122.778 |
| SQ | Nonadecanoic Acid | SCN8A    | 122.778 |
| SQ | Nonadecanoic Acid | HDAC2    | 122.778 |
| SQ | Nonadecanoic Acid | SLC13A1  | 80.882  |
| SQ | Nonadecanoic Acid | OXCT2    | 80.882  |
| SQ | Nonadecanoic Acid | ASPH     | 80.882  |
| SQ | Nonadecanoic Acid | P4HA1    | 80.882  |

|    |                   |          |         |
|----|-------------------|----------|---------|
| SQ | Nonadecanoic Acid | SUCLA2   | 80.882  |
| SQ | Nonadecanoic Acid | CRTAP    | 55.444  |
| SQ | Nonadecanoic Acid | SDHAF2   | 55.444  |
| SQ | Nonadecanoic Acid | HIF1AN   | 55.444  |
| SQ | Nonadecanoic Acid | PLAT     | 48      |
| SQ | Nonadecanoic Acid | GRIN2A   | 48      |
| SQ | Nonadecanoic Acid | GRIN2B   | 48      |
| SQ | Nonadecanoic Acid | SLC7A4   | 48      |
| SQ | Nonadecanoic Acid | GPD1L    | 22.373  |
| SQ | Nonadecanoic Acid | SUGCT    | 22.373  |
| SQ | Nonadecanoic Acid | COLGALT2 | 22.373  |
| SQ | Nonadecanoic Acid | SUOX     | 22.373  |
| SQ | Nonadecanoic Acid | CCL5     | 22.373  |
| SQ | Nonadecanoic Acid | ALDH9A1  | 22.373  |
| SQ | Nonadecanoic Acid | CYP11A1  | 22.373  |
| SQ | Nonadecanoic Acid | ACAT1    | 22.373  |
| SQ | Nonadecanoic Acid | PNLIPRP2 | 22.373  |
| SQ | Nonadecanoic Acid | 8-Mar    | 22.373  |
| SQ | Nonadecanoic Acid | DDC      | 22.373  |
| SQ | Nonadecanoic Acid | BCKDHB   | 22.373  |
| SQ | Nonadecanoic Acid | UROD     | 22.373  |
| SQ | Nonadecanoic Acid | SLC38A7  | 22.373  |
| SQ | Nonadecanoic Acid | PF4      | 22.373  |
| SQ | Nonadecanoic Acid | MYO5A    | 22.373  |
| SQ | Nonadecanoic Acid | EGLN3    | 22.373  |
| SQ | Nonadecanoic Acid | NPPA     | 22.373  |
| SQ | Nonadecanoic Acid | ARHGEF2  | 22.373  |
| SQ | Nonadecanoic Acid | HSD17B8  | 22.373  |
| SQ | Nonadecanoic Acid | RYR2     | 22.373  |
| SQ | Nonadecanoic Acid | GJA5     | 22.373  |
| SQ | Nonadecanoic Acid | GNAS     | 22.373  |
| SQ | Nonadecanoic Acid | SULT2A1  | 22.373  |
| SQ | Nonadecanoic Acid | SCN11A   | 122.778 |
| SQ | Nonadecanoic Acid | SCN3B    | 122.778 |
| SQ | Nonadecanoic Acid | SCN3A    | 122.778 |
| SQ | Nonadecanoic Acid | ALDH5A1  | 122.778 |
| SQ | Nonadecanoic Acid | COX7A1   | 122.778 |
| SQ | Nonadecanoic Acid | COX6A2   | 122.778 |
| SQ | Nonadecanoic Acid | COX6B1   | 122.778 |
| SQ | Nonadecanoic Acid | COX7B    | 122.778 |
| SQ | Nonadecanoic Acid | COX8A    | 122.778 |
| SQ | Nonadecanoic Acid | SUCLG1   | 80.882  |
| SQ | Nonadecanoic Acid | TMLHE    | 80.882  |
| SQ | Nonadecanoic Acid | BBOX1    | 80.882  |
| SQ | Nonadecanoic Acid | SDHC     | 80.882  |
| SQ | Nonadecanoic Acid | SDHD     | 80.882  |
| SQ | Nonadecanoic Acid | SLIT2    | 55.444  |
| SQ | Nonadecanoic Acid | SLC1A3   | 55.444  |
| SQ | Nonadecanoic Acid | UROS     | 55.444  |
| SQ | Nonadecanoic Acid | SLC7A2   | 48      |
| SQ | Nonadecanoic Acid | TOP1     | 48      |

|    |                   |          |         |
|----|-------------------|----------|---------|
| SQ | Nonadecanoic Acid | SLC7A3   | 48      |
| SQ | Nonadecanoic Acid | GRIN2D   | 48      |
| SQ | Nonadecanoic Acid | SRD5A1   | 22.373  |
| SQ | Nonadecanoic Acid | ACSS2    | 22.373  |
| SQ | Nonadecanoic Acid | SIX4     | 22.373  |
| SQ | Nonadecanoic Acid | CCL2     | 22.373  |
| SQ | Nonadecanoic Acid | ANK2     | 22.373  |
| SQ | Nonadecanoic Acid | TH       | 22.373  |
| SQ | Nonadecanoic Acid | DHODH    | 22.373  |
| SQ | Nonadecanoic Acid | GALC     | 22.373  |
| SQ | Nonadecanoic Acid | CYP39A1  | 22.373  |
| SQ | Nonadecanoic Acid | STIM1    | 22.373  |
| SQ | Nonadecanoic Acid | DHTKD1   | 22.373  |
| SQ | Nonadecanoic Acid | KCNE5    | 22.373  |
| SQ | Nonadecanoic Acid | UGT8     | 22.373  |
| SQ | Nonadecanoic Acid | ACSS1    | 22.373  |
| SQ | Nonadecanoic Acid | CRACR2A  | 22.373  |
| SQ | Nonadecanoic Acid | ILVBL    | 22.373  |
| SQ | Nonadecanoic Acid | OGDHL    | 22.373  |
| SQ | Nonadecanoic Acid | ACADM    | 22.373  |
| SQ | Nonadecanoic Acid | EGLN1    | 22.373  |
| SQ | Nonadecanoic Acid | CTNNB1   | 22.373  |
| SQ | Nonadecanoic Acid | HAP1     | 22.373  |
| SQ | Nonadecanoic Acid | DHRS9    | 22.373  |
| SQ | Nonadecanoic Acid | SLC25A13 | 22.373  |
| SQ | Nonadecanoic Acid | NFX1     | 22.373  |
| SQ | Nonadecanoic Acid | SCN2B    | 122.778 |
| SQ | Nonadecanoic Acid | COX6C    | 122.778 |
| SQ | Nonadecanoic Acid | AKR1C2   | 122.778 |
| SQ | Nonadecanoic Acid | SCN2A    | 122.778 |
| SQ | Nonadecanoic Acid | FECH     | 122.778 |
| SQ | Nonadecanoic Acid | SCN9A    | 122.778 |
| SQ | Nonadecanoic Acid | FABP6    | 122.778 |
| SQ | Nonadecanoic Acid | SCN1B    | 122.778 |
| SQ | Nonadecanoic Acid | NR1H4    | 122.778 |
| SQ | Nonadecanoic Acid | HSD17B6  | 80.882  |
| SQ | Nonadecanoic Acid | PLOD1    | 80.882  |
| SQ | Nonadecanoic Acid | SDHB     | 80.882  |
| SQ | Nonadecanoic Acid | P3H2     | 80.882  |
| SQ | Nonadecanoic Acid | P3H1     | 80.882  |
| SQ | Nonadecanoic Acid | ACO2     | 55.444  |
| SQ | Nonadecanoic Acid | SALL1    | 55.444  |
| SQ | Nonadecanoic Acid | SLC13A5  | 55.444  |
| SQ | Nonadecanoic Acid | CACNA1A  | 48      |
| SQ | Nonadecanoic Acid | PLG      | 48      |
| SQ | Nonadecanoic Acid | KARS     | 48      |
| SQ | Nonadecanoic Acid | ADORA1   | 48      |
| SQ | Nonadecanoic Acid | FBXO45   | 22.373  |
| SQ | Nonadecanoic Acid | ARV1     | 22.373  |
| SQ | Nonadecanoic Acid | MRPS36   | 22.373  |
| SQ | Nonadecanoic Acid | BCKDK    | 22.373  |

|    |                       |         |        |
|----|-----------------------|---------|--------|
| SQ | Nonadecanoic Acid     | HSD17B2 | 22.373 |
| SQ | Nonadecanoic Acid     | EPO     | 22.373 |
| SQ | Nonadecanoic Acid     | CLN3    | 22.373 |
| SQ | Nonadecanoic Acid     | PLCG2   | 22.373 |
| SQ | Nonadecanoic Acid     | BCKDHA  | 22.373 |
| SQ | Nonadecanoic Acid     | GAL3ST1 | 22.373 |
| SQ | Nonadecanoic Acid     | NEDD4L  | 22.373 |
| SQ | Nonadecanoic Acid     | SRD5A3  | 22.373 |
| SQ | Nonadecanoic Acid     | ETHE1   | 22.373 |
| SQ | Nonadecanoic Acid     | CYP4B1  | 22.373 |
| SQ | Nonadecanoic Acid     | HSD17B1 | 22.373 |
| SQ | Nonadecanoic Acid     | CAV3    | 22.373 |
| SQ | Nonadecanoic Acid     | KCNA5   | 22.373 |
| SQ | Nonadecanoic Acid     | SQRDL   | 22.373 |
| SQ | Nonadecanoic Acid     | ETFDH   | 22.373 |
| SQ | Nonadecanoic Acid     | P4HA3   | 22.373 |
| SQ | Nonadecanoic Acid     | PCSK9   | 22.373 |
| SQ | Nonadecanoic Acid     | GPR143  | 22.373 |
| SQ | Nonadecanoic Acid     | SFXN5   | 22.373 |
| SQ | Nonadecanoic Acid     | DBT     | 22.373 |
| SQ | Quercetin             | HTR2A   | 26.373 |
| SQ | Quercetin             | HTR1D   | 26.373 |
| SQ | Quercetin             | CALY    | 26.373 |
| SQ | Quercetin             | HTR2B   | 26.373 |
| SQ | Quercetin             | DRD2    | 26.373 |
| SQ | Quercetin             | DRD3    | 26.373 |
| SQ | Quercetin             | ADRA2A  | 26.373 |
| SQ | Quercetin             | DRD4    | 26.373 |
| SQ | Quercetin             | DRD5    | 26.373 |
| SQ | Quercetin             | HTR1B   | 26.373 |
| SQ | Quercetin             | HTR1A   | 26.373 |
| SQ | Quercetin             | DRD1    | 26.373 |
| SQ | Quercetin             | HTR2C   | 26.373 |
| SQ | Quercetin             | ADRA2C  | 26.373 |
| SQ | Quercetin             | ADRA2B  | 26.373 |
| SQ | Notoginsenoside R3    | ATP1A1  | 48     |
| SQ | Ditertbutyl Phthalate | SCN10A  | 80.882 |
| SQ | Ditertbutyl Phthalate | NRG1    | 22.373 |
| SQ | Ditertbutyl Phthalate | SCN5A   | 22.373 |
| SQ | Ditertbutyl Phthalate | SCN4B   | 22.373 |
| SQ | Ditertbutyl Phthalate | FNTA    | 22.373 |
| SQ | Ditertbutyl Phthalate | GJA5    | 22.373 |
| SQ | Ditertbutyl Phthalate | ACHE    | 80.882 |
| SQ | Ditertbutyl Phthalate | DMGDH   | 22.373 |
| SQ | Ditertbutyl Phthalate | PRSS12  | 22.373 |
| SQ | Ditertbutyl Phthalate | ASCL1   | 22.373 |
| SQ | Ditertbutyl Phthalate | AGRN    | 22.373 |
| SQ | Ditertbutyl Phthalate | GRIN1   | 22.373 |
| SQ | Ditertbutyl Phthalate | BCHE    | 80.882 |
| SQ | Ditertbutyl Phthalate | SIX3    | 22.373 |
| SQ | Ditertbutyl Phthalate | SLC44A4 | 22.373 |

|    |                       |          |         |
|----|-----------------------|----------|---------|
| SQ | Ditertbutyl Phthalate | ENPP6    | 22.373  |
| SQ | Ditertbutyl Phthalate | CHKA     | 22.373  |
| SQ | Ditertbutyl Phthalate | COLQ     | 55.444  |
| SQ | Ditertbutyl Phthalate | ANK2     | 22.373  |
| SQ | Ditertbutyl Phthalate | ALDH7A1  | 22.373  |
| SQ | Ditertbutyl Phthalate | CDH8     | 22.373  |
| SQ | Ditertbutyl Phthalate | RYR2     | 22.373  |
| SQ | Ditertbutyl Phthalate | SLC5A7   | 22.373  |
| SQ | Ditertbutyl Phthalate | CRP      | 22.373  |
| SQ | Ditertbutyl Phthalate | DNM3     | 22.373  |
| SQ | Ditertbutyl Phthalate | KCNA5    | 22.373  |
| SQ | Ditertbutyl Phthalate | CHDH     | 22.373  |
| SQ | Hexadecanoic Acid     | AKR1D1   | 686     |
| SQ | Hexadecanoic Acid     | ABAT     | 122.778 |
| SQ | Hexadecanoic Acid     | COX5B    | 122.778 |
| SQ | Hexadecanoic Acid     | SCN7A    | 122.778 |
| SQ | Hexadecanoic Acid     | COX5A    | 122.778 |
| SQ | Hexadecanoic Acid     | COX4I1   | 122.778 |
| SQ | Hexadecanoic Acid     | SCN4A    | 122.778 |
| SQ | Hexadecanoic Acid     | CES1     | 122.778 |
| SQ | Hexadecanoic Acid     | COX2     | 122.778 |
| SQ | Hexadecanoic Acid     | SUCLG2   | 80.882  |
| SQ | Hexadecanoic Acid     | SLC25A10 | 80.882  |
| SQ | Hexadecanoic Acid     | SUCNR1   | 80.882  |
| SQ | Hexadecanoic Acid     | OXCT1    | 80.882  |
| SQ | Hexadecanoic Acid     | SDHA     | 80.882  |
| SQ | Hexadecanoic Acid     | DCT      | 55.444  |
| SQ | Hexadecanoic Acid     | JMJD6    | 55.444  |
| SQ | Hexadecanoic Acid     | HSD17B11 | 55.444  |
| SQ | Hexadecanoic Acid     | P4HB     | 55.444  |
| SQ | Hexadecanoic Acid     | GRIN3B   | 48      |
| SQ | Hexadecanoic Acid     | CACNA1B  | 48      |
| SQ | Hexadecanoic Acid     | GRIN3A   | 48      |
| SQ | Hexadecanoic Acid     | GRIN1    | 48      |
| SQ | Hexadecanoic Acid     | SIRT1    | 22.373  |
| SQ | Hexadecanoic Acid     | SIX1     | 22.373  |
| SQ | Hexadecanoic Acid     | OSBPL8   | 22.373  |
| SQ | Hexadecanoic Acid     | UBE2B    | 22.373  |
| SQ | Hexadecanoic Acid     | STIM2    | 22.373  |
| SQ | Hexadecanoic Acid     | COLGALT1 | 22.373  |
| SQ | Hexadecanoic Acid     | ARID1A   | 22.373  |
| SQ | Hexadecanoic Acid     | ACOT4    | 22.373  |
| SQ | Hexadecanoic Acid     | SLC25A12 | 22.373  |
| SQ | Hexadecanoic Acid     | CDH11    | 22.373  |
| SQ | Hexadecanoic Acid     | BDKRB2   | 22.373  |
| SQ | Hexadecanoic Acid     | SMAD7    | 22.373  |
| SQ | Hexadecanoic Acid     | WNT10B   | 22.373  |
| SQ | Hexadecanoic Acid     | STAR     | 22.373  |
| SQ | Hexadecanoic Acid     | CAMK2D   | 22.373  |
| SQ | Hexadecanoic Acid     | HTT      | 22.373  |
| SQ | Hexadecanoic Acid     | TST      | 22.373  |

|    |                   |          |         |
|----|-------------------|----------|---------|
| SQ | Hexadecanoic Acid | TMEM110  | 22.373  |
| SQ | Hexadecanoic Acid | EPHA4    | 22.373  |
| SQ | Hexadecanoic Acid | EDA      | 22.373  |
| SQ | Hexadecanoic Acid | KCNQ1    | 22.373  |
| SQ | Hexadecanoic Acid | UGT1A1   | 22.373  |
| SQ | Hexadecanoic Acid | PLOD2    | 22.373  |
| SQ | Hexadecanoic Acid | SLC25A1  | 22.373  |
| SQ | Hexadecanoic Acid | TYR      | 686     |
| SQ | Hexadecanoic Acid | SCN1A    | 122.778 |
| SQ | Hexadecanoic Acid | COX7C    | 122.778 |
| SQ | Hexadecanoic Acid | SCN5A    | 122.778 |
| SQ | Hexadecanoic Acid | COX3     | 122.778 |
| SQ | Hexadecanoic Acid | HDAC9    | 122.778 |
| SQ | Hexadecanoic Acid | SCN4B    | 122.778 |
| SQ | Hexadecanoic Acid | ACADSB   | 122.778 |
| SQ | Hexadecanoic Acid | OGDH     | 122.778 |
| SQ | Hexadecanoic Acid | SLC13A2  | 80.882  |
| SQ | Hexadecanoic Acid | P3H3     | 80.882  |
| SQ | Hexadecanoic Acid | SLC13A3  | 80.882  |
| SQ | Hexadecanoic Acid | PLOD3    | 80.882  |
| SQ | Hexadecanoic Acid | P4HA2    | 80.882  |
| SQ | Hexadecanoic Acid | AKR1C3   | 55.444  |
| SQ | Hexadecanoic Acid | SLC13A4  | 55.444  |
| SQ | Hexadecanoic Acid | TYRP1    | 55.444  |
| SQ | Hexadecanoic Acid | CACNA2D1 | 48      |
| SQ | Hexadecanoic Acid | CACNA2D2 | 48      |
| SQ | Hexadecanoic Acid | GRIN2C   | 48      |
| SQ | Hexadecanoic Acid | SLC7A1   | 48      |
| SQ | Hexadecanoic Acid | HDAC1    | 23      |
| SQ | Hexadecanoic Acid | SHMT1    | 22.373  |
| SQ | Hexadecanoic Acid | BDH1     | 22.373  |
| SQ | Hexadecanoic Acid | SPI1     | 22.373  |
| SQ | Hexadecanoic Acid | CYP1A2   | 22.373  |
| SQ | Hexadecanoic Acid | PKD2     | 22.373  |
| SQ | Hexadecanoic Acid | NEDD4    | 22.373  |
| SQ | Hexadecanoic Acid | EGLN2    | 22.373  |
| SQ | Hexadecanoic Acid | PHGDH    | 22.373  |
| SQ | Hexadecanoic Acid | YBX3     | 22.373  |
| SQ | Hexadecanoic Acid | CACNA1D  | 22.373  |
| SQ | Hexadecanoic Acid | PRPH     | 22.373  |
| SQ | Hexadecanoic Acid | PRDM8    | 22.373  |
| SQ | Hexadecanoic Acid | OGFOD1   | 22.373  |
| SQ | Hexadecanoic Acid | DLST     | 22.373  |
| SQ | Hexadecanoic Acid | AP3D1    | 22.373  |
| SQ | Hexadecanoic Acid | IL10     | 22.373  |
| SQ | Hexadecanoic Acid | SLC1A6   | 22.373  |
| SQ | Hexadecanoic Acid | CDC42    | 22.373  |
| SQ | Hexadecanoic Acid | OCA2     | 22.373  |
| SQ | Hexadecanoic Acid | HACL1    | 22.373  |
| SQ | Hexadecanoic Acid | CASQ2    | 22.373  |
| SQ | Hexadecanoic Acid | DLD      | 22.373  |

|    |                   |          |         |
|----|-------------------|----------|---------|
| SQ | Hexadecanoic Acid | CYP1A1   | 22.373  |
| SQ | Hexadecanoic Acid | SRD5A2   | 686     |
| SQ | Hexadecanoic Acid | ESRRG    | 122.778 |
| SQ | Hexadecanoic Acid | COX1     | 122.778 |
| SQ | Hexadecanoic Acid | SCN10A   | 122.778 |
| SQ | Hexadecanoic Acid | AR       | 122.778 |
| SQ | Hexadecanoic Acid | PLA2G1B  | 122.778 |
| SQ | Hexadecanoic Acid | ADH1C    | 122.778 |
| SQ | Hexadecanoic Acid | SCN8A    | 122.778 |
| SQ | Hexadecanoic Acid | HDAC2    | 122.778 |
| SQ | Hexadecanoic Acid | SLC13A1  | 80.882  |
| SQ | Hexadecanoic Acid | OXCT2    | 80.882  |
| SQ | Hexadecanoic Acid | ASPH     | 80.882  |
| SQ | Hexadecanoic Acid | P4HA1    | 80.882  |
| SQ | Hexadecanoic Acid | SUCLA2   | 80.882  |
| SQ | Hexadecanoic Acid | CRTAP    | 55.444  |
| SQ | Hexadecanoic Acid | SDHAF2   | 55.444  |
| SQ | Hexadecanoic Acid | HIF1AN   | 55.444  |
| SQ | Hexadecanoic Acid | PLAT     | 48      |
| SQ | Hexadecanoic Acid | GRIN2A   | 48      |
| SQ | Hexadecanoic Acid | GRIN2B   | 48      |
| SQ | Hexadecanoic Acid | SLC7A4   | 48      |
| SQ | Hexadecanoic Acid | GPD1L    | 22.373  |
| SQ | Hexadecanoic Acid | SUGCT    | 22.373  |
| SQ | Hexadecanoic Acid | COLGALT2 | 22.373  |
| SQ | Hexadecanoic Acid | SUOX     | 22.373  |
| SQ | Hexadecanoic Acid | CCL5     | 22.373  |
| SQ | Hexadecanoic Acid | ALDH9A1  | 22.373  |
| SQ | Hexadecanoic Acid | CYP11A1  | 22.373  |
| SQ | Hexadecanoic Acid | ACAT1    | 22.373  |
| SQ | Hexadecanoic Acid | PNLIPRP2 | 22.373  |
| SQ | Hexadecanoic Acid | 8-Mar    | 22.373  |
| SQ | Hexadecanoic Acid | DDC      | 22.373  |
| SQ | Hexadecanoic Acid | BCKDHB   | 22.373  |
| SQ | Hexadecanoic Acid | UROD     | 22.373  |
| SQ | Hexadecanoic Acid | SLC38A7  | 22.373  |
| SQ | Hexadecanoic Acid | PF4      | 22.373  |
| SQ | Hexadecanoic Acid | MYO5A    | 22.373  |
| SQ | Hexadecanoic Acid | EGLN3    | 22.373  |
| SQ | Hexadecanoic Acid | NPPA     | 22.373  |
| SQ | Hexadecanoic Acid | ARHGEF2  | 22.373  |
| SQ | Hexadecanoic Acid | HSD17B8  | 22.373  |
| SQ | Hexadecanoic Acid | RYR2     | 22.373  |
| SQ | Hexadecanoic Acid | GJA5     | 22.373  |
| SQ | Hexadecanoic Acid | GNAS     | 22.373  |
| SQ | Hexadecanoic Acid | SULT2A1  | 22.373  |
| SQ | Hexadecanoic Acid | SCN11A   | 122.778 |
| SQ | Hexadecanoic Acid | SCN3B    | 122.778 |
| SQ | Hexadecanoic Acid | SCN3A    | 122.778 |
| SQ | Hexadecanoic Acid | ALDH5A1  | 122.778 |
| SQ | Hexadecanoic Acid | COX7A1   | 122.778 |

|    |                   |          |         |
|----|-------------------|----------|---------|
| SQ | Hexadecanoic Acid | COX6A2   | 122.778 |
| SQ | Hexadecanoic Acid | COX6B1   | 122.778 |
| SQ | Hexadecanoic Acid | COX7B    | 122.778 |
| SQ | Hexadecanoic Acid | COX8A    | 122.778 |
| SQ | Hexadecanoic Acid | SUCLG1   | 80.882  |
| SQ | Hexadecanoic Acid | TMLHE    | 80.882  |
| SQ | Hexadecanoic Acid | BBOX1    | 80.882  |
| SQ | Hexadecanoic Acid | SDHC     | 80.882  |
| SQ | Hexadecanoic Acid | SDHD     | 80.882  |
| SQ | Hexadecanoic Acid | SLIT2    | 55.444  |
| SQ | Hexadecanoic Acid | SLC1A3   | 55.444  |
| SQ | Hexadecanoic Acid | UROS     | 55.444  |
| SQ | Hexadecanoic Acid | SLC7A2   | 48      |
| SQ | Hexadecanoic Acid | TOP1     | 48      |
| SQ | Hexadecanoic Acid | SLC7A3   | 48      |
| SQ | Hexadecanoic Acid | GRIN2D   | 48      |
| SQ | Hexadecanoic Acid | SRD5A1   | 22.373  |
| SQ | Hexadecanoic Acid | ACSS2    | 22.373  |
| SQ | Hexadecanoic Acid | SIX4     | 22.373  |
| SQ | Hexadecanoic Acid | CCL2     | 22.373  |
| SQ | Hexadecanoic Acid | ANK2     | 22.373  |
| SQ | Hexadecanoic Acid | TH       | 22.373  |
| SQ | Hexadecanoic Acid | DHODH    | 22.373  |
| SQ | Hexadecanoic Acid | GALC     | 22.373  |
| SQ | Hexadecanoic Acid | CYP39A1  | 22.373  |
| SQ | Hexadecanoic Acid | STIM1    | 22.373  |
| SQ | Hexadecanoic Acid | DHTKD1   | 22.373  |
| SQ | Hexadecanoic Acid | KCNE5    | 22.373  |
| SQ | Hexadecanoic Acid | UGT8     | 22.373  |
| SQ | Hexadecanoic Acid | ACSS1    | 22.373  |
| SQ | Hexadecanoic Acid | CRACR2A  | 22.373  |
| SQ | Hexadecanoic Acid | ILVBL    | 22.373  |
| SQ | Hexadecanoic Acid | OGDHL    | 22.373  |
| SQ | Hexadecanoic Acid | ACADM    | 22.373  |
| SQ | Hexadecanoic Acid | EGLN1    | 22.373  |
| SQ | Hexadecanoic Acid | CTNNB1   | 22.373  |
| SQ | Hexadecanoic Acid | HAP1     | 22.373  |
| SQ | Hexadecanoic Acid | DHRS9    | 22.373  |
| SQ | Hexadecanoic Acid | SLC25A13 | 22.373  |
| SQ | Hexadecanoic Acid | NFX1     | 22.373  |
| SQ | Hexadecanoic Acid | SCN2B    | 122.778 |
| SQ | Hexadecanoic Acid | COX6C    | 122.778 |
| SQ | Hexadecanoic Acid | AKR1C2   | 122.778 |
| SQ | Hexadecanoic Acid | SCN2A    | 122.778 |
| SQ | Hexadecanoic Acid | FECH     | 122.778 |
| SQ | Hexadecanoic Acid | SCN9A    | 122.778 |
| SQ | Hexadecanoic Acid | FABP6    | 122.778 |
| SQ | Hexadecanoic Acid | SCN1B    | 122.778 |
| SQ | Hexadecanoic Acid | NR1H4    | 122.778 |
| SQ | Hexadecanoic Acid | HSD17B6  | 80.882  |
| SQ | Hexadecanoic Acid | PLOD1    | 80.882  |



|    |                   |         |         |
|----|-------------------|---------|---------|
| SQ | Hexadecanoic Acid | SDHB    | 80.882  |
| SQ | Hexadecanoic Acid | P3H2    | 80.882  |
| SQ | Hexadecanoic Acid | P3H1    | 80.882  |
| SQ | Hexadecanoic Acid | ACO2    | 55.444  |
| SQ | Hexadecanoic Acid | SALL1   | 55.444  |
| SQ | Hexadecanoic Acid | SLC13A5 | 55.444  |
| SQ | Hexadecanoic Acid | CACNA1A | 48      |
| SQ | Hexadecanoic Acid | PLG     | 48      |
| SQ | Hexadecanoic Acid | KARS    | 48      |
| SQ | Hexadecanoic Acid | ADORA1  | 48      |
| SQ | Hexadecanoic Acid | FBXO45  | 22.373  |
| SQ | Hexadecanoic Acid | ARV1    | 22.373  |
| SQ | Hexadecanoic Acid | MRPS36  | 22.373  |
| SQ | Hexadecanoic Acid | BCKDK   | 22.373  |
| SQ | Hexadecanoic Acid | HSD17B2 | 22.373  |
| SQ | Hexadecanoic Acid | EPO     | 22.373  |
| SQ | Hexadecanoic Acid | CLN3    | 22.373  |
| SQ | Hexadecanoic Acid | PLCG2   | 22.373  |
| SQ | Hexadecanoic Acid | BCKDHA  | 22.373  |
| SQ | Hexadecanoic Acid | GAL3ST1 | 22.373  |
| SQ | Hexadecanoic Acid | NEDD4L  | 22.373  |
| SQ | Hexadecanoic Acid | SRD5A3  | 22.373  |
| SQ | Hexadecanoic Acid | ETHE1   | 22.373  |
| SQ | Hexadecanoic Acid | CYP4B1  | 22.373  |
| SQ | Hexadecanoic Acid | HSD17B1 | 22.373  |
| SQ | Hexadecanoic Acid | CAV3    | 22.373  |
| SQ | Hexadecanoic Acid | KCNA5   | 22.373  |
| SQ | Hexadecanoic Acid | SQRDL   | 22.373  |
| SQ | Hexadecanoic Acid | ETFDH   | 22.373  |
| SQ | Hexadecanoic Acid | P4HA3   | 22.373  |
| SQ | Hexadecanoic Acid | PCSK9   | 22.373  |
| SQ | Hexadecanoic Acid | GPR143  | 22.373  |
| SQ | Hexadecanoic Acid | SFXN5   | 22.373  |
| SQ | Hexadecanoic Acid | DBT     | 22.373  |
| SQ | Dauricine         | ACHE    | 122.778 |
| SQ | Dauricine         | CHRM3   | 48      |
| SQ | Dauricine         | HTR1D   | 48      |
| SQ | Dauricine         | ADRA2C  | 48      |
| SQ | Dauricine         | BCHE    | 48      |
| SQ | Dauricine         | CHRNA2  | 122.778 |
| SQ | Dauricine         | HTR2B   | 48      |
| SQ | Dauricine         | DRD2    | 48      |
| SQ | Dauricine         | CALY    | 48      |
| SQ | Dauricine         | ADRA2B  | 48      |
| SQ | Dauricine         | HTR3A   | 122.778 |
| SQ | Dauricine         | ADRA2A  | 48      |
| SQ | Dauricine         | SLC18A2 | 48      |
| SQ | Dauricine         | DRD3    | 48      |
| SQ | Dauricine         | CHRM2   | 122.778 |
| SQ | Dauricine         | HTR1B   | 48      |
| SQ | Dauricine         | DRD4    | 48      |

|    |                          |         |        |
|----|--------------------------|---------|--------|
| SQ | Dauricine                | DRD5    | 48     |
| SQ | Dauricine                | HTR2A   | 48     |
| SQ | Dauricine                | HTR2C   | 48     |
| SQ | Dauricine                | HTR1A   | 48     |
| SQ | Dauricine                | DRD1    | 48     |
| SQ | 3,4-Dimethylbenzoic Acid | PLAT    | 80.882 |
| SQ | 3,4-Dimethylbenzoic Acid | BCL2    | 80.882 |
| SQ | 3,4-Dimethylbenzoic Acid | PTGS2   | 80.882 |
| SQ | 3,4-Dimethylbenzoic Acid | IL13    | 55.444 |
| SQ | 3,4-Dimethylbenzoic Acid | AKR1C1  | 48     |
| SQ | 3,4-Dimethylbenzoic Acid | SLC4A7  | 22.373 |
| SQ | 3,4-Dimethylbenzoic Acid | NGFR    | 22.373 |
| SQ | 3,4-Dimethylbenzoic Acid | SIRT2   | 22.373 |
| SQ | 3,4-Dimethylbenzoic Acid | AVPR1A  | 22.373 |
| SQ | 3,4-Dimethylbenzoic Acid | FASLG   | 22.373 |
| SQ | 3,4-Dimethylbenzoic Acid | MAPK9   | 22.373 |
| SQ | 3,4-Dimethylbenzoic Acid | OXER1   | 22.373 |
| SQ | 3,4-Dimethylbenzoic Acid | RUNX1   | 22.373 |
| SQ | 3,4-Dimethylbenzoic Acid | HSH2D   | 22.373 |
| SQ | 3,4-Dimethylbenzoic Acid | CNTF    | 22.373 |
| SQ | 3,4-Dimethylbenzoic Acid | SRC     | 22.373 |
| SQ | 3,4-Dimethylbenzoic Acid | SLC6A4  | 22.373 |
| SQ | 3,4-Dimethylbenzoic Acid | INS     | 22.373 |
| SQ | 3,4-Dimethylbenzoic Acid | WNT11   | 22.373 |
| SQ | 3,4-Dimethylbenzoic Acid | SLC26A3 | 22.373 |
| SQ | 3,4-Dimethylbenzoic Acid | IL6     | 22.373 |
| SQ | 3,4-Dimethylbenzoic Acid | NR1D1   | 22.373 |
| SQ | 3,4-Dimethylbenzoic Acid | SLC34A1 | 22.373 |
| SQ | 3,4-Dimethylbenzoic Acid | CPLX2   | 22.373 |
| SQ | 3,4-Dimethylbenzoic Acid | MYOG    | 22.373 |
| SQ | 3,4-Dimethylbenzoic Acid | SEC61B  | 22.373 |
| SQ | 3,4-Dimethylbenzoic Acid | CCM2L   | 22.373 |
| SQ | 3,4-Dimethylbenzoic Acid | HCAR2   | 80.882 |
| SQ | 3,4-Dimethylbenzoic Acid | FABP2   | 80.882 |
| SQ | 3,4-Dimethylbenzoic Acid | NNMT    | 80.882 |
| SQ | 3,4-Dimethylbenzoic Acid | C1QTNF3 | 55.444 |
| SQ | 3,4-Dimethylbenzoic Acid | PDXP    | 22.373 |
| SQ | 3,4-Dimethylbenzoic Acid | NOX1    | 22.373 |
| SQ | 3,4-Dimethylbenzoic Acid | FNDC5   | 22.373 |
| SQ | 3,4-Dimethylbenzoic Acid | OSBPL8  | 22.373 |
| SQ | 3,4-Dimethylbenzoic Acid | DNAJC3  | 22.373 |
| SQ | 3,4-Dimethylbenzoic Acid | ITGB3   | 22.373 |
| SQ | 3,4-Dimethylbenzoic Acid | ADAMTS9 | 22.373 |
| SQ | 3,4-Dimethylbenzoic Acid | PNPLA2  | 22.373 |
| SQ | 3,4-Dimethylbenzoic Acid | CLN3    | 22.373 |
| SQ | 3,4-Dimethylbenzoic Acid | ITGAV   | 22.373 |
| SQ | 3,4-Dimethylbenzoic Acid | PTPN2   | 22.373 |
| SQ | 3,4-Dimethylbenzoic Acid | AVP     | 22.373 |
| SQ | 3,4-Dimethylbenzoic Acid | TCAF2   | 22.373 |
| SQ | 3,4-Dimethylbenzoic Acid | NGF     | 22.373 |
| SQ | 3,4-Dimethylbenzoic Acid | CDKN2A  | 22.373 |

|    |                          |           |        |
|----|--------------------------|-----------|--------|
| SQ | 3,4-Dimethylbenzoic Acid | CDC20     | 22.373 |
| SQ | 3,4-Dimethylbenzoic Acid | RET       | 22.373 |
| SQ | 3,4-Dimethylbenzoic Acid | IFI6      | 22.373 |
| SQ | 3,4-Dimethylbenzoic Acid | MECOM     | 22.373 |
| SQ | 3,4-Dimethylbenzoic Acid | PPARA     | 22.373 |
| SQ | 3,4-Dimethylbenzoic Acid | S100A9    | 22.373 |
| SQ | 3,4-Dimethylbenzoic Acid | NR1H4     | 22.373 |
| SQ | 3,4-Dimethylbenzoic Acid | THBD      | 80.882 |
| SQ | 3,4-Dimethylbenzoic Acid | CFTR      | 80.882 |
| SQ | 3,4-Dimethylbenzoic Acid | APOA2     | 55.444 |
| SQ | 3,4-Dimethylbenzoic Acid | KCNE2     | 55.444 |
| SQ | 3,4-Dimethylbenzoic Acid | NDRG2     | 22.373 |
| SQ | 3,4-Dimethylbenzoic Acid | NAMPT     | 22.373 |
| SQ | 3,4-Dimethylbenzoic Acid | RAB11FIP5 | 22.373 |
| SQ | 3,4-Dimethylbenzoic Acid | CA7       | 22.373 |
| SQ | 3,4-Dimethylbenzoic Acid | ANO9      | 22.373 |
| SQ | 3,4-Dimethylbenzoic Acid | TP53      | 22.373 |
| SQ | 3,4-Dimethylbenzoic Acid | SLC26A6   | 22.373 |
| SQ | 3,4-Dimethylbenzoic Acid | MYF6      | 22.373 |
| SQ | 3,4-Dimethylbenzoic Acid | PNP       | 22.373 |
| SQ | 3,4-Dimethylbenzoic Acid | SCRIB     | 22.373 |
| SQ | 3,4-Dimethylbenzoic Acid | S100A8    | 22.373 |
| SQ | 3,4-Dimethylbenzoic Acid | BAX       | 22.373 |
| SQ | 3,4-Dimethylbenzoic Acid | BDKRB2    | 22.373 |
| SQ | 3,4-Dimethylbenzoic Acid | RAB11FIP3 | 22.373 |
| SQ | 3,4-Dimethylbenzoic Acid | ALOX15B   | 22.373 |
| SQ | 3,4-Dimethylbenzoic Acid | NUDT12    | 22.373 |
| SQ | 3,4-Dimethylbenzoic Acid | BCL2L1    | 22.373 |
| SQ | 3,4-Dimethylbenzoic Acid | ABCA1     | 22.373 |
| SQ | 3,4-Dimethylbenzoic Acid | ABHD5     | 22.373 |
| SQ | 3,4-Dimethylbenzoic Acid | CA2       | 22.373 |
| SQ | 3,4-Dimethylbenzoic Acid | RAB11FIP1 | 22.373 |
| SQ | 3,4-Dimethylbenzoic Acid | ABCG1     | 22.373 |
| SQ | 3,4-Dimethylbenzoic Acid | PPARG     | 80.882 |
| SQ | 3,4-Dimethylbenzoic Acid | HCAR3     | 80.882 |
| SQ | 3,4-Dimethylbenzoic Acid | TCAF1     | 55.444 |
| SQ | 3,4-Dimethylbenzoic Acid | ANXA1     | 55.444 |
| SQ | 3,4-Dimethylbenzoic Acid | ASPDH     | 22.373 |
| SQ | 3,4-Dimethylbenzoic Acid | RGCC      | 22.373 |
| SQ | 3,4-Dimethylbenzoic Acid | NR1H3     | 22.373 |
| SQ | 3,4-Dimethylbenzoic Acid | MYF5      | 22.373 |
| SQ | 3,4-Dimethylbenzoic Acid | SHOX2     | 22.373 |
| SQ | 3,4-Dimethylbenzoic Acid | PRKDC     | 22.373 |
| SQ | 3,4-Dimethylbenzoic Acid | FXYD1     | 22.373 |
| SQ | 3,4-Dimethylbenzoic Acid | MEF2C     | 22.373 |
| SQ | 3,4-Dimethylbenzoic Acid | AURKA     | 22.373 |
| SQ | 3,4-Dimethylbenzoic Acid | MYOD1     | 22.373 |
| SQ | 3,4-Dimethylbenzoic Acid | ALOX5AP   | 22.373 |
| SQ | 3,4-Dimethylbenzoic Acid | IFNG      | 22.373 |
| SQ | 3,4-Dimethylbenzoic Acid | NR1H2     | 22.373 |
| SQ | 3,4-Dimethylbenzoic Acid | ANAPC2    | 22.373 |

|    |                          |          |        |
|----|--------------------------|----------|--------|
| SQ | 3,4-Dimethylbenzoic Acid | CAV3     | 22.373 |
| SQ | 3,4-Dimethylbenzoic Acid | DNAJA3   | 22.373 |
| SQ | 3,4-Dimethylbenzoic Acid | COL1A1   | 22.373 |
| SQ | 3,4-Dimethylbenzoic Acid | KMO      | 22.373 |
| SQ | 3,4-Dimethylbenzoic Acid | SNCA     | 22.373 |
| SQ | 3,4-Dimethylbenzoic Acid | ALOX15   | 22.373 |
| SQ | 3,4-Dimethylbenzoic Acid | KYNU     | 22.373 |
| SQ | 3,4-Dimethylbenzoic Acid | PRDM16   | 22.373 |
| SQ | 3,4-Dimethylbenzoic Acid | QPRT     | 80.882 |
| SQ | 3,4-Dimethylbenzoic Acid | PTGS1    | 80.882 |
| SQ | 3,4-Dimethylbenzoic Acid | IL1B     | 55.444 |
| SQ | 3,4-Dimethylbenzoic Acid | SERPINB7 | 55.444 |
| SQ | 3,4-Dimethylbenzoic Acid | ATOH1    | 22.373 |
| SQ | 3,4-Dimethylbenzoic Acid | SIRT1    | 22.373 |
| SQ | 3,4-Dimethylbenzoic Acid | ADAMTS20 | 22.373 |
| SQ | 3,4-Dimethylbenzoic Acid | ACMSD    | 22.373 |
| SQ | 3,4-Dimethylbenzoic Acid | KITLG    | 22.373 |
| SQ | 3,4-Dimethylbenzoic Acid | METRNL   | 22.373 |
| SQ | 3,4-Dimethylbenzoic Acid | STX3     | 22.373 |
| SQ | 3,4-Dimethylbenzoic Acid | PTGIS    | 22.373 |
| SQ | 3,4-Dimethylbenzoic Acid | HEG1     | 22.373 |
| SQ | 3,4-Dimethylbenzoic Acid | MCL1     | 22.373 |
| SQ | 3,4-Dimethylbenzoic Acid | TCF3     | 22.373 |
| SQ | 3,4-Dimethylbenzoic Acid | SEC24B   | 22.373 |
| SQ | 3,4-Dimethylbenzoic Acid | NEUROD2  | 22.373 |
| SQ | 3,4-Dimethylbenzoic Acid | HAAO     | 22.373 |
| SQ | 3,4-Dimethylbenzoic Acid | HTT      | 22.373 |
| SQ | 3,4-Dimethylbenzoic Acid | ZEB2     | 22.373 |
| SQ | 3,4-Dimethylbenzoic Acid | BDNF     | 22.373 |
| SQ | 3,4-Dimethylbenzoic Acid | NAPRT    | 22.373 |
| SQ | 3,4-Dimethylbenzoic Acid | ADIPOQ   | 22.373 |
| SQ | 3,4-Dimethylbenzoic Acid | PAWR     | 22.373 |
| SQ | 3,4-Dimethylbenzoic Acid | FABP3    | 22.373 |
| SQ | 3,4-Dimethylbenzoic Acid | RAG2     | 22.373 |
| SQ | Notoginsenoside R1       | ATP1A1   | 48     |
| SQ | Notoginsenoside A        | ATP1A1   | 48     |
| SQ | Gypenoside XVII          | ATP1A1   | 48     |
| SQ | Epsilon-Cadinene         | KCND1    | 80.882 |
| SQ | Epsilon-Cadinene         | GAMT     | 80.882 |
| SQ | Epsilon-Cadinene         | CAT      | 80.882 |
| SQ | Epsilon-Cadinene         | KCNC1    | 80.882 |
| SQ | Epsilon-Cadinene         | KCND2    | 80.882 |
| SQ | Epsilon-Cadinene         | KCND3    | 80.882 |
| SQ | Epsilon-Cadinene         | KCNQ1    | 55.444 |
| SQ | Epsilon-Cadinene         | CYGB     | 22.373 |
| SQ | Epsilon-Cadinene         | IGF1     | 22.373 |
| SQ | Epsilon-Cadinene         | EDN1     | 22.373 |
| SQ | Epsilon-Cadinene         | CNTNAP4  | 22.373 |
| SQ | Epsilon-Cadinene         | GRIN2A   | 22.373 |
| SQ | Epsilon-Cadinene         | SPARC    | 22.373 |
| SQ | Epsilon-Cadinene         | CRLF1    | 22.373 |

|    |                  |         |        |
|----|------------------|---------|--------|
| SQ | Epsilon-Cadinene | ALDH1B1 | 22.373 |
| SQ | Epsilon-Cadinene | DARS    | 22.373 |
| SQ | Epsilon-Cadinene | MIP     | 22.373 |
| SQ | Epsilon-Cadinene | STX1A   | 22.373 |
| SQ | Epsilon-Cadinene | NRXN2   | 22.373 |
| SQ | Epsilon-Cadinene | DAB2IP  | 22.373 |
| SQ | Epsilon-Cadinene | KCNA3   | 80.882 |
| SQ | Epsilon-Cadinene | KCNC3   | 80.882 |
| SQ | Epsilon-Cadinene | KCNB1   | 80.882 |
| SQ | Epsilon-Cadinene | ADH1C   | 80.882 |
| SQ | Epsilon-Cadinene | ALDH2   | 80.882 |
| SQ | Epsilon-Cadinene | GUCY1B3 | 55.444 |
| SQ | Epsilon-Cadinene | FBP1    | 22.373 |
| SQ | Epsilon-Cadinene | NRXN3   | 22.373 |
| SQ | Epsilon-Cadinene | SHANK3  | 22.373 |
| SQ | Epsilon-Cadinene | OXT     | 22.373 |
| SQ | Epsilon-Cadinene | RNASE4  | 22.373 |
| SQ | Epsilon-Cadinene | SLC17A7 | 22.373 |
| SQ | Epsilon-Cadinene | SORCS3  | 22.373 |
| SQ | Epsilon-Cadinene | FADD    | 22.373 |
| SQ | Epsilon-Cadinene | LEP     | 22.373 |
| SQ | Epsilon-Cadinene | ANK3    | 22.373 |
| SQ | Epsilon-Cadinene | RYR3    | 22.373 |
| SQ | Epsilon-Cadinene | PAXBP1  | 22.373 |
| SQ | Epsilon-Cadinene | ADORA1  | 22.373 |
| SQ | Epsilon-Cadinene | CYP2E1  | 22.373 |
| SQ | Epsilon-Cadinene | PRKAB1  | 80.882 |
| SQ | Epsilon-Cadinene | KCNA1   | 80.882 |
| SQ | Epsilon-Cadinene | ADH1B   | 80.882 |
| SQ | Epsilon-Cadinene | KCNB2   | 80.882 |
| SQ | Epsilon-Cadinene | KCNA4   | 80.882 |
| SQ | Epsilon-Cadinene | GATM    | 55.444 |
| SQ | Epsilon-Cadinene | DGKI    | 22.373 |
| SQ | Epsilon-Cadinene | LRRC4B  | 22.373 |
| SQ | Epsilon-Cadinene | ACY3    | 22.373 |
| SQ | Epsilon-Cadinene | MAGI2   | 22.373 |
| SQ | Epsilon-Cadinene | RAB3A   | 22.373 |
| SQ | Epsilon-Cadinene | CYP11A1 | 22.373 |
| SQ | Epsilon-Cadinene | RNASE8  | 22.373 |
| SQ | Epsilon-Cadinene | SNTG2   | 22.373 |
| SQ | Epsilon-Cadinene | NLGN1   | 22.373 |
| SQ | Epsilon-Cadinene | KCNE5   | 22.373 |
| SQ | Epsilon-Cadinene | ZPR1    | 22.373 |
| SQ | Epsilon-Cadinene | PAX7    | 22.373 |
| SQ | Epsilon-Cadinene | ADH4    | 22.373 |
| SQ | Epsilon-Cadinene | ACY1    | 22.373 |
| SQ | Epsilon-Cadinene | ADH1A   | 80.882 |
| SQ | Epsilon-Cadinene | KCNA2   | 80.882 |
| SQ | Epsilon-Cadinene | DLG4    | 80.882 |
| SQ | Epsilon-Cadinene | KCNA5   | 80.882 |
| SQ | Epsilon-Cadinene | KCNA7   | 80.882 |

|    |                  |         |         |
|----|------------------|---------|---------|
| SQ | Epsilon-Cadinene | KCNK4   | 55.444  |
| SQ | Epsilon-Cadinene | ADH7    | 22.373  |
| SQ | Epsilon-Cadinene | AQP8    | 22.373  |
| SQ | Epsilon-Cadinene | ASPA    | 22.373  |
| SQ | Epsilon-Cadinene | APOE    | 22.373  |
| SQ | Epsilon-Cadinene | MC4R    | 22.373  |
| SQ | Epsilon-Cadinene | SCN5A   | 22.373  |
| SQ | Epsilon-Cadinene | KCNIP2  | 22.373  |
| SQ | Epsilon-Cadinene | SCGB1A1 | 22.373  |
| SQ | Epsilon-Cadinene | CACNA1D | 22.373  |
| SQ | Epsilon-Cadinene | PPARD   | 22.373  |
| SQ | Epsilon-Cadinene | ALDH3B1 | 22.373  |
| SQ | Epsilon-Cadinene | ALDH3B2 | 22.373  |
| SQ | Epsilon-Cadinene | GJA5    | 22.373  |
| SQ | Epsilon-Cadinene | KCNA10  | 80.882  |
| SQ | Epsilon-Cadinene | TPO     | 80.882  |
| SQ | Epsilon-Cadinene | KCNC2   | 80.882  |
| SQ | Epsilon-Cadinene | RNASE1  | 80.882  |
| SQ | Epsilon-Cadinene | KCNA6   | 80.882  |
| SQ | Epsilon-Cadinene | IYD     | 55.444  |
| SQ | Epsilon-Cadinene | NFIB    | 22.373  |
| SQ | Epsilon-Cadinene | ARX     | 22.373  |
| SQ | Epsilon-Cadinene | NRXN1   | 22.373  |
| SQ | Epsilon-Cadinene | SOX15   | 22.373  |
| SQ | Epsilon-Cadinene | IL1B    | 22.373  |
| SQ | Epsilon-Cadinene | SCN10A  | 22.373  |
| SQ | Epsilon-Cadinene | GPX7    | 22.373  |
| SQ | Epsilon-Cadinene | OXTR    | 22.373  |
| SQ | Epsilon-Cadinene | RAPGEF2 | 22.373  |
| SQ | Epsilon-Cadinene | NKX2-1  | 22.373  |
| SQ | Epsilon-Cadinene | NPPA    | 22.373  |
| SQ | Epsilon-Cadinene | RNASE2  | 22.373  |
| SQ | Epsilon-Cadinene | FAS     | 22.373  |
| SQ | 1-Tetradecanol   | TRPV3   | 122.778 |
| SQ | 1-Tetradecanol   | GRIA4   | 80.882  |
| SQ | 1-Tetradecanol   | CHRN3   | 80.882  |
| SQ | 1-Tetradecanol   | GABRG3  | 80.882  |
| SQ | 1-Tetradecanol   | GABRA3  | 80.882  |
| SQ | 1-Tetradecanol   | CHRNA10 | 80.882  |
| SQ | 1-Tetradecanol   | CACNA1C | 80.882  |
| SQ | 1-Tetradecanol   | CHRNA2  | 80.882  |
| SQ | 1-Tetradecanol   | HTR3B   | 80.882  |
| SQ | 1-Tetradecanol   | GABRA6  | 80.882  |
| SQ | 1-Tetradecanol   | CHRNA5  | 80.882  |
| SQ | 1-Tetradecanol   | CACNG1  | 80.882  |
| SQ | 1-Tetradecanol   | DMTN    | 55.444  |
| SQ | 1-Tetradecanol   | SCN1A   | 48      |
| SQ | 1-Tetradecanol   | SCN10A  | 48      |
| SQ | 1-Tetradecanol   | TYR     | 48      |
| SQ | 1-Tetradecanol   | ACADSB  | 48      |
| SQ | 1-Tetradecanol   | GLRA3   | 23      |

|    |                |         |         |
|----|----------------|---------|---------|
| SQ | 1-Tetradecanol | NAV2    | 22.373  |
| SQ | 1-Tetradecanol | CACNA1A | 22.373  |
| SQ | 1-Tetradecanol | MTNR1B  | 22.373  |
| SQ | 1-Tetradecanol | FLOT1   | 22.373  |
| SQ | 1-Tetradecanol | ADRA1D  | 22.373  |
| SQ | 1-Tetradecanol | MAOA    | 22.373  |
| SQ | 1-Tetradecanol | RAB3B   | 22.373  |
| SQ | 1-Tetradecanol | DRD4    | 22.373  |
| SQ | 1-Tetradecanol | AOC3    | 22.373  |
| SQ | 1-Tetradecanol | RNF207  | 22.373  |
| SQ | 1-Tetradecanol | NPPA    | 22.373  |
| SQ | 1-Tetradecanol | EPHB1   | 22.373  |
| SQ | 1-Tetradecanol | PINK1   | 22.373  |
| SQ | 1-Tetradecanol | KISS1   | 22.373  |
| SQ | 1-Tetradecanol | OPRK1   | 122.778 |
| SQ | 1-Tetradecanol | GABRA2  | 80.882  |
| SQ | 1-Tetradecanol | GABRB1  | 80.882  |
| SQ | 1-Tetradecanol | VCAM1   | 80.882  |
| SQ | 1-Tetradecanol | SLC29A1 | 80.882  |
| SQ | 1-Tetradecanol | GRIA2   | 80.882  |
| SQ | 1-Tetradecanol | CHRNA2  | 80.882  |
| SQ | 1-Tetradecanol | CHRNA6  | 80.882  |
| SQ | 1-Tetradecanol | GRIA3   | 80.882  |
| SQ | 1-Tetradecanol | HTR3A   | 80.882  |
| SQ | 1-Tetradecanol | CHRNA4  | 80.882  |
| SQ | 1-Tetradecanol | ADAM8   | 55.444  |
| SQ | 1-Tetradecanol | KCNMA1  | 55.444  |
| SQ | 1-Tetradecanol | SCN3B   | 48      |
| SQ | 1-Tetradecanol | AKR1D1  | 48      |
| SQ | 1-Tetradecanol | SCN9A   | 48      |
| SQ | 1-Tetradecanol | SCN8A   | 48      |
| SQ | 1-Tetradecanol | HMGA2   | 22.373  |
| SQ | 1-Tetradecanol | P2RX2   | 22.373  |
| SQ | 1-Tetradecanol | ANK2    | 22.373  |
| SQ | 1-Tetradecanol | MAOB    | 22.373  |
| SQ | 1-Tetradecanol | NPY5R   | 22.373  |
| SQ | 1-Tetradecanol | DRD2    | 22.373  |
| SQ | 1-Tetradecanol | UTS2R   | 22.373  |
| SQ | 1-Tetradecanol | KCNE5   | 22.373  |
| SQ | 1-Tetradecanol | CRH     | 22.373  |
| SQ | 1-Tetradecanol | NCOA1   | 22.373  |
| SQ | 1-Tetradecanol | ROCK1   | 22.373  |
| SQ | 1-Tetradecanol | KMT2A   | 22.373  |
| SQ | 1-Tetradecanol | DRD1    | 22.373  |
| SQ | 1-Tetradecanol | KCNQ1   | 22.373  |
| SQ | 1-Tetradecanol | GRM7    | 22.373  |
| SQ | 1-Tetradecanol | TRPM8   | 122.778 |
| SQ | 1-Tetradecanol | CACNG2  | 80.882  |
| SQ | 1-Tetradecanol | GRIA1   | 80.882  |
| SQ | 1-Tetradecanol | CHRNA7  | 80.882  |
| SQ | 1-Tetradecanol | CACNA1S | 80.882  |

|    |                |         |         |
|----|----------------|---------|---------|
| SQ | 1-Tetradecanol | GABRA4  | 80.882  |
| SQ | 1-Tetradecanol | CACNA1D | 80.882  |
| SQ | 1-Tetradecanol | GABRB3  | 80.882  |
| SQ | 1-Tetradecanol | GABRA5  | 80.882  |
| SQ | 1-Tetradecanol | GABRA1  | 80.882  |
| SQ | 1-Tetradecanol | KCNJ9   | 80.882  |
| SQ | 1-Tetradecanol | SLC28A3 | 55.444  |
| SQ | 1-Tetradecanol | SCN11A  | 48      |
| SQ | 1-Tetradecanol | SCN3A   | 48      |
| SQ | 1-Tetradecanol | ALDH5A1 | 48      |
| SQ | 1-Tetradecanol | SCN4A   | 48      |
| SQ | 1-Tetradecanol | SCN1B   | 48      |
| SQ | 1-Tetradecanol | CACNA1H | 22.373  |
| SQ | 1-Tetradecanol | HTR2A   | 22.373  |
| SQ | 1-Tetradecanol | ZP4     | 22.373  |
| SQ | 1-Tetradecanol | GLRB    | 22.373  |
| SQ | 1-Tetradecanol | MSN     | 22.373  |
| SQ | 1-Tetradecanol | AVP     | 22.373  |
| SQ | 1-Tetradecanol | ADIRF   | 22.373  |
| SQ | 1-Tetradecanol | CNR1    | 22.373  |
| SQ | 1-Tetradecanol | GLI3    | 22.373  |
| SQ | 1-Tetradecanol | AOC2    | 22.373  |
| SQ | 1-Tetradecanol | KCNA5   | 22.373  |
| SQ | 1-Tetradecanol | TNR     | 22.373  |
| SQ | 1-Tetradecanol | EEA1    | 22.373  |
| SQ | 1-Tetradecanol | ICAM1   | 22.373  |
| SQ | 1-Tetradecanol | FOS     | 22.373  |
| SQ | 1-Tetradecanol | TRPA1   | 122.778 |
| SQ | 1-Tetradecanol | GABRD   | 80.882  |
| SQ | 1-Tetradecanol | GLRA2   | 80.882  |
| SQ | 1-Tetradecanol | KCNJ6   | 80.882  |
| SQ | 1-Tetradecanol | GABRG1  | 80.882  |
| SQ | 1-Tetradecanol | CHRNA3  | 80.882  |
| SQ | 1-Tetradecanol | HTR3D   | 80.882  |
| SQ | 1-Tetradecanol | KCNJ5   | 80.882  |
| SQ | 1-Tetradecanol | SLC29A2 | 80.882  |
| SQ | 1-Tetradecanol | CHRNA9  | 80.882  |
| SQ | 1-Tetradecanol | HTR3C   | 80.882  |
| SQ | 1-Tetradecanol | ADRA1B  | 55.444  |
| SQ | 1-Tetradecanol | SCN2B   | 48      |
| SQ | 1-Tetradecanol | SCN7A   | 48      |
| SQ | 1-Tetradecanol | SCN2A   | 48      |
| SQ | 1-Tetradecanol | SCN4B   | 48      |
| SQ | 1-Tetradecanol | OGDH    | 48      |
| SQ | 1-Tetradecanol | SLITRK6 | 22.373  |
| SQ | 1-Tetradecanol | AVPR1A  | 22.373  |
| SQ | 1-Tetradecanol | SUMO1   | 22.373  |
| SQ | 1-Tetradecanol | P2RX3   | 22.373  |
| SQ | 1-Tetradecanol | GHRL    | 22.373  |
| SQ | 1-Tetradecanol | PAX2    | 22.373  |
| SQ | 1-Tetradecanol | GHRH    | 22.373  |



|    |                |          |        |
|----|----------------|----------|--------|
| SQ | 1-Tetradecanol | SLC18A3  | 22.373 |
| SQ | 1-Tetradecanol | CAV3     | 22.373 |
| SQ | 1-Tetradecanol | IL6      | 22.373 |
| SQ | 1-Tetradecanol | TACR2    | 22.373 |
| SQ | 1-Tetradecanol | ZP3      | 22.373 |
| SQ | 1-Tetradecanol | POU4F3   | 22.373 |
| SQ | 1-Tetradecanol | CARTPT   | 22.373 |
| SQ | 1-Tetradecanol | GRIN1    | 22.373 |
| SQ | 1-Tetradecanol | CACNB1   | 80.882 |
| SQ | 1-Tetradecanol | CHRNA4   | 80.882 |
| SQ | 1-Tetradecanol | KCNJ3    | 80.882 |
| SQ | 1-Tetradecanol | GABRE    | 80.882 |
| SQ | 1-Tetradecanol | GABRP    | 80.882 |
| SQ | 1-Tetradecanol | GABRB2   | 80.882 |
| SQ | 1-Tetradecanol | GABRQ    | 80.882 |
| SQ | 1-Tetradecanol | GRIN3A   | 80.882 |
| SQ | 1-Tetradecanol | HTR3E    | 80.882 |
| SQ | 1-Tetradecanol | CHRFAM7A | 80.882 |
| SQ | 1-Tetradecanol | GLRA1    | 80.882 |
| SQ | 1-Tetradecanol | FOXL2    | 55.444 |
| SQ | 1-Tetradecanol | ABAT     | 48     |
| SQ | 1-Tetradecanol | SCN5A    | 48     |
| SQ | 1-Tetradecanol | HDAC9    | 48     |
| SQ | 1-Tetradecanol | SRD5A2   | 48     |
| SQ | 1-Tetradecanol | HDAC2    | 48     |
| SQ | 1-Tetradecanol | UTS2     | 22.373 |
| SQ | 1-Tetradecanol | ADORA2A  | 22.373 |
| SQ | 1-Tetradecanol | CNR2     | 22.373 |
| SQ | 1-Tetradecanol | SLC44A4  | 22.373 |
| SQ | 1-Tetradecanol | TBR1     | 22.373 |
| SQ | 1-Tetradecanol | AOC1     | 22.373 |
| SQ | 1-Tetradecanol | HCRT     | 22.373 |
| SQ | 1-Tetradecanol | EZR      | 22.373 |
| SQ | 1-Tetradecanol | SLC9A6   | 22.373 |
| SQ | 1-Tetradecanol | GLRA4    | 22.373 |
| SQ | 1-Tetradecanol | NRP1     | 22.373 |
| SQ | 1-Tetradecanol | PLCB1    | 22.373 |
| SQ | 1-Tetradecanol | CALCA    | 22.373 |
| SQ | 1-Tetradecanol | ATP8B1   | 22.373 |
| SQ | Cyperol        | VDR      | 80.882 |
| SQ | Cyperol        | PGR      | 48     |
| SQ | Cyperol        | GPBAR1   | 22.373 |
| SQ | Cyperol        | CALB1    | 22.373 |
| SQ | Cyperol        | TCF3     | 22.373 |
| SQ | Cyperol        | B4GALT1  | 22.373 |
| SQ | Cyperol        | RXRA     | 22.373 |
| SQ | Cyperol        | CYP27B1  | 80.882 |
| SQ | Cyperol        | AR       | 48     |
| SQ | Cyperol        | SNAI2    | 22.373 |
| SQ | Cyperol        | FGF23    | 22.373 |
| SQ | Cyperol        | BAX      | 22.373 |

|    |                |         |         |
|----|----------------|---------|---------|
| SQ | Cyperol        | S100G   | 22.373  |
| SQ | Cyperol        | NR1H4   | 22.373  |
| SQ | Cyperol        | GC      | 55.444  |
| SQ | Cyperol        | NFKB1   | 22.373  |
| SQ | Cyperol        | MED1    | 22.373  |
| SQ | Cyperol        | GF11    | 22.373  |
| SQ | Cyperol        | KL      | 22.373  |
| SQ | Cyperol        | CYP27A1 | 22.373  |
| SQ | Cyperol        | TRIM24  | 22.373  |
| SQ | Cyperol        | SNW1    | 55.444  |
| SQ | Cyperol        | AKR1C3  | 22.373  |
| SQ | Cyperol        | SNAI1   | 22.373  |
| SQ | Cyperol        | LANCL2  | 22.373  |
| SQ | Cyperol        | CYP2R1  | 22.373  |
| SQ | Cyperol        | KANK2   | 22.373  |
| SQ | Cyperol        | ESR1    | 48      |
| SQ | Cyperol        | CYP24A1 | 22.373  |
| SQ | Cyperol        | CYP3A4  | 22.373  |
| SQ | Cyperol        | WNT4    | 22.373  |
| SQ | Cyperol        | PML     | 22.373  |
| SQ | Cyperol        | IRX5    | 22.373  |
| SQ | 1-Heptadecanol | TRPV3   | 122.778 |
| SQ | 1-Heptadecanol | GRIA4   | 80.882  |
| SQ | 1-Heptadecanol | CHRN3   | 80.882  |
| SQ | 1-Heptadecanol | GABRG3  | 80.882  |
| SQ | 1-Heptadecanol | GABRA3  | 80.882  |
| SQ | 1-Heptadecanol | CHRNA10 | 80.882  |
| SQ | 1-Heptadecanol | CACNA1C | 80.882  |
| SQ | 1-Heptadecanol | CHRNA2  | 80.882  |
| SQ | 1-Heptadecanol | HTR3B   | 80.882  |
| SQ | 1-Heptadecanol | GABRA6  | 80.882  |
| SQ | 1-Heptadecanol | CHRNA5  | 80.882  |
| SQ | 1-Heptadecanol | CACNG1  | 80.882  |
| SQ | 1-Heptadecanol | DMTN    | 55.444  |
| SQ | 1-Heptadecanol | SCN1A   | 48      |
| SQ | 1-Heptadecanol | SCN10A  | 48      |
| SQ | 1-Heptadecanol | TYR     | 48      |
| SQ | 1-Heptadecanol | ACADSB  | 48      |
| SQ | 1-Heptadecanol | GLRA3   | 23      |
| SQ | 1-Heptadecanol | NAV2    | 22.373  |
| SQ | 1-Heptadecanol | CACNA1A | 22.373  |
| SQ | 1-Heptadecanol | MTNR1B  | 22.373  |
| SQ | 1-Heptadecanol | FLOT1   | 22.373  |
| SQ | 1-Heptadecanol | ADRA1D  | 22.373  |
| SQ | 1-Heptadecanol | MAOA    | 22.373  |
| SQ | 1-Heptadecanol | RAB3B   | 22.373  |
| SQ | 1-Heptadecanol | DRD4    | 22.373  |
| SQ | 1-Heptadecanol | AOC3    | 22.373  |
| SQ | 1-Heptadecanol | RNF207  | 22.373  |
| SQ | 1-Heptadecanol | NPPA    | 22.373  |
| SQ | 1-Heptadecanol | EPHB1   | 22.373  |

|    |                |         |         |
|----|----------------|---------|---------|
| SQ | 1-Heptadecanol | PINK1   | 22.373  |
| SQ | 1-Heptadecanol | KISS1   | 22.373  |
| SQ | 1-Heptadecanol | OPRK1   | 122.778 |
| SQ | 1-Heptadecanol | GABRA2  | 80.882  |
| SQ | 1-Heptadecanol | GABRB1  | 80.882  |
| SQ | 1-Heptadecanol | VCAM1   | 80.882  |
| SQ | 1-Heptadecanol | SLC29A1 | 80.882  |
| SQ | 1-Heptadecanol | GRIA2   | 80.882  |
| SQ | 1-Heptadecanol | CHRN2   | 80.882  |
| SQ | 1-Heptadecanol | CHRNA6  | 80.882  |
| SQ | 1-Heptadecanol | GRIA3   | 80.882  |
| SQ | 1-Heptadecanol | HTR3A   | 80.882  |
| SQ | 1-Heptadecanol | CHRN4   | 80.882  |
| SQ | 1-Heptadecanol | ADAM8   | 55.444  |
| SQ | 1-Heptadecanol | KCNMA1  | 55.444  |
| SQ | 1-Heptadecanol | SCN3B   | 48      |
| SQ | 1-Heptadecanol | AKR1D1  | 48      |
| SQ | 1-Heptadecanol | SCN9A   | 48      |
| SQ | 1-Heptadecanol | SCN8A   | 48      |
| SQ | 1-Heptadecanol | HMGA2   | 22.373  |
| SQ | 1-Heptadecanol | P2RX2   | 22.373  |
| SQ | 1-Heptadecanol | ANK2    | 22.373  |
| SQ | 1-Heptadecanol | MAOB    | 22.373  |
| SQ | 1-Heptadecanol | NPY5R   | 22.373  |
| SQ | 1-Heptadecanol | DRD2    | 22.373  |
| SQ | 1-Heptadecanol | UTS2R   | 22.373  |
| SQ | 1-Heptadecanol | KCNE5   | 22.373  |
| SQ | 1-Heptadecanol | CRH     | 22.373  |
| SQ | 1-Heptadecanol | NCOA1   | 22.373  |
| SQ | 1-Heptadecanol | ROCK1   | 22.373  |
| SQ | 1-Heptadecanol | KMT2A   | 22.373  |
| SQ | 1-Heptadecanol | DRD1    | 22.373  |
| SQ | 1-Heptadecanol | KCNQ1   | 22.373  |
| SQ | 1-Heptadecanol | GRM7    | 22.373  |
| SQ | 1-Heptadecanol | TRPM8   | 122.778 |
| SQ | 1-Heptadecanol | CACNG2  | 80.882  |
| SQ | 1-Heptadecanol | GRIA1   | 80.882  |
| SQ | 1-Heptadecanol | CHRNA7  | 80.882  |
| SQ | 1-Heptadecanol | CACNA1S | 80.882  |
| SQ | 1-Heptadecanol | GABRA4  | 80.882  |
| SQ | 1-Heptadecanol | CACNA1D | 80.882  |
| SQ | 1-Heptadecanol | GABRB3  | 80.882  |
| SQ | 1-Heptadecanol | GABRA5  | 80.882  |
| SQ | 1-Heptadecanol | GABRA1  | 80.882  |
| SQ | 1-Heptadecanol | KCNJ9   | 80.882  |
| SQ | 1-Heptadecanol | SLC28A3 | 55.444  |
| SQ | 1-Heptadecanol | SCN11A  | 48      |
| SQ | 1-Heptadecanol | SCN3A   | 48      |
| SQ | 1-Heptadecanol | ALDH5A1 | 48      |
| SQ | 1-Heptadecanol | SCN4A   | 48      |
| SQ | 1-Heptadecanol | SCN1B   | 48      |

|    |                |         |         |
|----|----------------|---------|---------|
| SQ | 1-Heptadecanol | CACNA1H | 22.373  |
| SQ | 1-Heptadecanol | HTR2A   | 22.373  |
| SQ | 1-Heptadecanol | ZP4     | 22.373  |
| SQ | 1-Heptadecanol | GLRB    | 22.373  |
| SQ | 1-Heptadecanol | MSN     | 22.373  |
| SQ | 1-Heptadecanol | AVP     | 22.373  |
| SQ | 1-Heptadecanol | ADIRF   | 22.373  |
| SQ | 1-Heptadecanol | CNR1    | 22.373  |
| SQ | 1-Heptadecanol | GLI3    | 22.373  |
| SQ | 1-Heptadecanol | AOC2    | 22.373  |
| SQ | 1-Heptadecanol | KCNA5   | 22.373  |
| SQ | 1-Heptadecanol | TNR     | 22.373  |
| SQ | 1-Heptadecanol | EEA1    | 22.373  |
| SQ | 1-Heptadecanol | ICAM1   | 22.373  |
| SQ | 1-Heptadecanol | FOS     | 22.373  |
| SQ | 1-Heptadecanol | TRPA1   | 122.778 |
| SQ | 1-Heptadecanol | GABRD   | 80.882  |
| SQ | 1-Heptadecanol | GLRA2   | 80.882  |
| SQ | 1-Heptadecanol | KCNJ6   | 80.882  |
| SQ | 1-Heptadecanol | GABRG1  | 80.882  |
| SQ | 1-Heptadecanol | CHRNA3  | 80.882  |
| SQ | 1-Heptadecanol | HTR3D   | 80.882  |
| SQ | 1-Heptadecanol | KCNJ5   | 80.882  |
| SQ | 1-Heptadecanol | SLC29A2 | 80.882  |
| SQ | 1-Heptadecanol | CHRNA9  | 80.882  |
| SQ | 1-Heptadecanol | HTR3C   | 80.882  |
| SQ | 1-Heptadecanol | ADRA1B  | 55.444  |
| SQ | 1-Heptadecanol | SCN2B   | 48      |
| SQ | 1-Heptadecanol | SCN7A   | 48      |
| SQ | 1-Heptadecanol | SCN2A   | 48      |
| SQ | 1-Heptadecanol | SCN4B   | 48      |
| SQ | 1-Heptadecanol | OGDH    | 48      |
| SQ | 1-Heptadecanol | SLITRK6 | 22.373  |
| SQ | 1-Heptadecanol | AVPR1A  | 22.373  |
| SQ | 1-Heptadecanol | SUMO1   | 22.373  |
| SQ | 1-Heptadecanol | P2RX3   | 22.373  |
| SQ | 1-Heptadecanol | GHRL    | 22.373  |
| SQ | 1-Heptadecanol | PAX2    | 22.373  |
| SQ | 1-Heptadecanol | GHRH    | 22.373  |
| SQ | 1-Heptadecanol | SLC18A3 | 22.373  |
| SQ | 1-Heptadecanol | CAV3    | 22.373  |
| SQ | 1-Heptadecanol | IL6     | 22.373  |
| SQ | 1-Heptadecanol | TACR2   | 22.373  |
| SQ | 1-Heptadecanol | ZP3     | 22.373  |
| SQ | 1-Heptadecanol | POU4F3  | 22.373  |
| SQ | 1-Heptadecanol | CARTPT  | 22.373  |
| SQ | 1-Heptadecanol | GRIN1   | 22.373  |
| SQ | 1-Heptadecanol | CACNB1  | 80.882  |
| SQ | 1-Heptadecanol | CHRNA4  | 80.882  |
| SQ | 1-Heptadecanol | KCNJ3   | 80.882  |
| SQ | 1-Heptadecanol | GABRE   | 80.882  |

|    |                |          |         |
|----|----------------|----------|---------|
| SQ | 1-Heptadecanol | GABRP    | 80.882  |
| SQ | 1-Heptadecanol | GABRB2   | 80.882  |
| SQ | 1-Heptadecanol | GABRQ    | 80.882  |
| SQ | 1-Heptadecanol | GRIN3A   | 80.882  |
| SQ | 1-Heptadecanol | HTR3E    | 80.882  |
| SQ | 1-Heptadecanol | CHRFAM7A | 80.882  |
| SQ | 1-Heptadecanol | GLRA1    | 80.882  |
| SQ | 1-Heptadecanol | FOXL2    | 55.444  |
| SQ | 1-Heptadecanol | ABAT     | 48      |
| SQ | 1-Heptadecanol | SCN5A    | 48      |
| SQ | 1-Heptadecanol | HDAC9    | 48      |
| SQ | 1-Heptadecanol | SRD5A2   | 48      |
| SQ | 1-Heptadecanol | HDAC2    | 48      |
| SQ | 1-Heptadecanol | UTS2     | 22.373  |
| SQ | 1-Heptadecanol | ADORA2A  | 22.373  |
| SQ | 1-Heptadecanol | CNR2     | 22.373  |
| SQ | 1-Heptadecanol | SLC44A4  | 22.373  |
| SQ | 1-Heptadecanol | TBR1     | 22.373  |
| SQ | 1-Heptadecanol | AOC1     | 22.373  |
| SQ | 1-Heptadecanol | HCRT     | 22.373  |
| SQ | 1-Heptadecanol | EZR      | 22.373  |
| SQ | 1-Heptadecanol | SLC9A6   | 22.373  |
| SQ | 1-Heptadecanol | GLRA4    | 22.373  |
| SQ | 1-Heptadecanol | NRP1     | 22.373  |
| SQ | 1-Heptadecanol | PLCB1    | 22.373  |
| SQ | 1-Heptadecanol | CALCA    | 22.373  |
| SQ | 1-Heptadecanol | ATP8B1   | 22.373  |
| SQ | N-Nonanol      | TRPV3    | 122.778 |
| SQ | N-Nonanol      | GRIA4    | 80.882  |
| SQ | N-Nonanol      | CHRN3    | 80.882  |
| SQ | N-Nonanol      | GABRG3   | 80.882  |
| SQ | N-Nonanol      | GABRA3   | 80.882  |
| SQ | N-Nonanol      | CHRNA10  | 80.882  |
| SQ | N-Nonanol      | CACNA1C  | 80.882  |
| SQ | N-Nonanol      | CHRNA2   | 80.882  |
| SQ | N-Nonanol      | HTR3B    | 80.882  |
| SQ | N-Nonanol      | GABRA6   | 80.882  |
| SQ | N-Nonanol      | CHRNA5   | 80.882  |
| SQ | N-Nonanol      | CACNG1   | 80.882  |
| SQ | N-Nonanol      | DMTN     | 55.444  |
| SQ | N-Nonanol      | SCN1A    | 48      |
| SQ | N-Nonanol      | SCN10A   | 48      |
| SQ | N-Nonanol      | TYR      | 48      |
| SQ | N-Nonanol      | ACADSB   | 48      |
| SQ | N-Nonanol      | GLRA3    | 23      |
| SQ | N-Nonanol      | NAV2     | 22.373  |
| SQ | N-Nonanol      | CACNA1A  | 22.373  |
| SQ | N-Nonanol      | MTNR1B   | 22.373  |
| SQ | N-Nonanol      | FLOT1    | 22.373  |
| SQ | N-Nonanol      | ADRA1D   | 22.373  |
| SQ | N-Nonanol      | MAOA     | 22.373  |

|    |           |         |         |
|----|-----------|---------|---------|
| SQ | N-Nonanol | RAB3B   | 22.373  |
| SQ | N-Nonanol | DRD4    | 22.373  |
| SQ | N-Nonanol | AOC3    | 22.373  |
| SQ | N-Nonanol | RNF207  | 22.373  |
| SQ | N-Nonanol | NPPA    | 22.373  |
| SQ | N-Nonanol | EPHB1   | 22.373  |
| SQ | N-Nonanol | PINK1   | 22.373  |
| SQ | N-Nonanol | KISS1   | 22.373  |
| SQ | N-Nonanol | OPRK1   | 122.778 |
| SQ | N-Nonanol | GABRA2  | 80.882  |
| SQ | N-Nonanol | GABRB1  | 80.882  |
| SQ | N-Nonanol | VCAM1   | 80.882  |
| SQ | N-Nonanol | SLC29A1 | 80.882  |
| SQ | N-Nonanol | GRIA2   | 80.882  |
| SQ | N-Nonanol | CHRNB2  | 80.882  |
| SQ | N-Nonanol | CHRNA6  | 80.882  |
| SQ | N-Nonanol | GRIA3   | 80.882  |
| SQ | N-Nonanol | HTR3A   | 80.882  |
| SQ | N-Nonanol | CHRNB4  | 80.882  |
| SQ | N-Nonanol | ADAM8   | 55.444  |
| SQ | N-Nonanol | KCNMA1  | 55.444  |
| SQ | N-Nonanol | SCN3B   | 48      |
| SQ | N-Nonanol | AKR1D1  | 48      |
| SQ | N-Nonanol | SCN9A   | 48      |
| SQ | N-Nonanol | SCN8A   | 48      |
| SQ | N-Nonanol | HMGA2   | 22.373  |
| SQ | N-Nonanol | P2RX2   | 22.373  |
| SQ | N-Nonanol | ANK2    | 22.373  |
| SQ | N-Nonanol | MAOB    | 22.373  |
| SQ | N-Nonanol | NPY5R   | 22.373  |
| SQ | N-Nonanol | DRD2    | 22.373  |
| SQ | N-Nonanol | UTS2R   | 22.373  |
| SQ | N-Nonanol | KCNE5   | 22.373  |
| SQ | N-Nonanol | CRH     | 22.373  |
| SQ | N-Nonanol | NCOA1   | 22.373  |
| SQ | N-Nonanol | ROCK1   | 22.373  |
| SQ | N-Nonanol | KMT2A   | 22.373  |
| SQ | N-Nonanol | DRD1    | 22.373  |
| SQ | N-Nonanol | KCNQ1   | 22.373  |
| SQ | N-Nonanol | GRM7    | 22.373  |
| SQ | N-Nonanol | TRPM8   | 122.778 |
| SQ | N-Nonanol | CACNG2  | 80.882  |
| SQ | N-Nonanol | GRIA1   | 80.882  |
| SQ | N-Nonanol | CHRNA7  | 80.882  |
| SQ | N-Nonanol | CACNA1S | 80.882  |
| SQ | N-Nonanol | GABRA4  | 80.882  |
| SQ | N-Nonanol | CACNA1D | 80.882  |
| SQ | N-Nonanol | GABRB3  | 80.882  |
| SQ | N-Nonanol | GABRA5  | 80.882  |
| SQ | N-Nonanol | GABRA1  | 80.882  |
| SQ | N-Nonanol | KCNJ9   | 80.882  |

|    |           |         |         |
|----|-----------|---------|---------|
| SQ | N-Nonanol | SLC28A3 | 55.444  |
| SQ | N-Nonanol | SCN11A  | 48      |
| SQ | N-Nonanol | SCN3A   | 48      |
| SQ | N-Nonanol | ALDH5A1 | 48      |
| SQ | N-Nonanol | SCN4A   | 48      |
| SQ | N-Nonanol | SCN1B   | 48      |
| SQ | N-Nonanol | CACNA1H | 22.373  |
| SQ | N-Nonanol | HTR2A   | 22.373  |
| SQ | N-Nonanol | ZP4     | 22.373  |
| SQ | N-Nonanol | GLRB    | 22.373  |
| SQ | N-Nonanol | MSN     | 22.373  |
| SQ | N-Nonanol | AVP     | 22.373  |
| SQ | N-Nonanol | ADIRF   | 22.373  |
| SQ | N-Nonanol | CNR1    | 22.373  |
| SQ | N-Nonanol | GLI3    | 22.373  |
| SQ | N-Nonanol | AOC2    | 22.373  |
| SQ | N-Nonanol | KCNA5   | 22.373  |
| SQ | N-Nonanol | TNR     | 22.373  |
| SQ | N-Nonanol | EEA1    | 22.373  |
| SQ | N-Nonanol | ICAM1   | 22.373  |
| SQ | N-Nonanol | FOS     | 22.373  |
| SQ | N-Nonanol | TRPA1   | 122.778 |
| SQ | N-Nonanol | GABRD   | 80.882  |
| SQ | N-Nonanol | GLRA2   | 80.882  |
| SQ | N-Nonanol | KCNJ6   | 80.882  |
| SQ | N-Nonanol | GABRG1  | 80.882  |
| SQ | N-Nonanol | CHRNA3  | 80.882  |
| SQ | N-Nonanol | HTR3D   | 80.882  |
| SQ | N-Nonanol | KCNJ5   | 80.882  |
| SQ | N-Nonanol | SLC29A2 | 80.882  |
| SQ | N-Nonanol | CHRNA9  | 80.882  |
| SQ | N-Nonanol | HTR3C   | 80.882  |
| SQ | N-Nonanol | ADRA1B  | 55.444  |
| SQ | N-Nonanol | SCN2B   | 48      |
| SQ | N-Nonanol | SCN7A   | 48      |
| SQ | N-Nonanol | SCN2A   | 48      |
| SQ | N-Nonanol | SCN4B   | 48      |
| SQ | N-Nonanol | OGDH    | 48      |
| SQ | N-Nonanol | SLITRK6 | 22.373  |
| SQ | N-Nonanol | AVPR1A  | 22.373  |
| SQ | N-Nonanol | SUMO1   | 22.373  |
| SQ | N-Nonanol | P2RX3   | 22.373  |
| SQ | N-Nonanol | GHRL    | 22.373  |
| SQ | N-Nonanol | PAX2    | 22.373  |
| SQ | N-Nonanol | GHRH    | 22.373  |
| SQ | N-Nonanol | SLC18A3 | 22.373  |
| SQ | N-Nonanol | CAV3    | 22.373  |
| SQ | N-Nonanol | IL6     | 22.373  |
| SQ | N-Nonanol | TACR2   | 22.373  |
| SQ | N-Nonanol | ZP3     | 22.373  |
| SQ | N-Nonanol | POU4F3  | 22.373  |

|    |              |          |        |
|----|--------------|----------|--------|
| SQ | N-Nonanol    | CARTPT   | 22.373 |
| SQ | N-Nonanol    | GRIN1    | 22.373 |
| SQ | N-Nonanol    | CACNB1   | 80.882 |
| SQ | N-Nonanol    | CHRNA4   | 80.882 |
| SQ | N-Nonanol    | KCNJ3    | 80.882 |
| SQ | N-Nonanol    | GABRE    | 80.882 |
| SQ | N-Nonanol    | GABRP    | 80.882 |
| SQ | N-Nonanol    | GABRB2   | 80.882 |
| SQ | N-Nonanol    | GABRQ    | 80.882 |
| SQ | N-Nonanol    | GRIN3A   | 80.882 |
| SQ | N-Nonanol    | HTR3E    | 80.882 |
| SQ | N-Nonanol    | CHRFAM7A | 80.882 |
| SQ | N-Nonanol    | GLRA1    | 80.882 |
| SQ | N-Nonanol    | FOXL2    | 55.444 |
| SQ | N-Nonanol    | ABAT     | 48     |
| SQ | N-Nonanol    | SCN5A    | 48     |
| SQ | N-Nonanol    | HDAC9    | 48     |
| SQ | N-Nonanol    | SRD5A2   | 48     |
| SQ | N-Nonanol    | HDAC2    | 48     |
| SQ | N-Nonanol    | UTS2     | 22.373 |
| SQ | N-Nonanol    | ADORA2A  | 22.373 |
| SQ | N-Nonanol    | CNR2     | 22.373 |
| SQ | N-Nonanol    | SLC44A4  | 22.373 |
| SQ | N-Nonanol    | TBR1     | 22.373 |
| SQ | N-Nonanol    | AOC1     | 22.373 |
| SQ | N-Nonanol    | HCRT     | 22.373 |
| SQ | N-Nonanol    | EZR      | 22.373 |
| SQ | N-Nonanol    | SLC9A6   | 22.373 |
| SQ | N-Nonanol    | GLRA4    | 22.373 |
| SQ | N-Nonanol    | NRP1     | 22.373 |
| SQ | N-Nonanol    | PLCB1    | 22.373 |
| SQ | N-Nonanol    | CALCA    | 22.373 |
| SQ | N-Nonanol    | ATP8B1   | 22.373 |
| SQ | Acetophenone | PTGIS    | 80.882 |
| SQ | Acetophenone | CYP11B2  | 80.882 |
| SQ | Acetophenone | SERPINB7 | 55.444 |
| SQ | Acetophenone | AVPR1A   | 22.373 |
| SQ | Acetophenone | HEG1     | 22.373 |
| SQ | Acetophenone | INS      | 22.373 |
| SQ | Acetophenone | NAPRT    | 22.373 |
| SQ | Acetophenone | ANXA1    | 22.373 |
| SQ | Acetophenone | VKORC1   | 80.882 |
| SQ | Acetophenone | CACNA1G  | 80.882 |
| SQ | Acetophenone | NDRG2    | 22.373 |
| SQ | Acetophenone | METRNL   | 22.373 |
| SQ | Acetophenone | AVP      | 22.373 |
| SQ | Acetophenone | ANAPC2   | 22.373 |
| SQ | Acetophenone | MECOM    | 22.373 |
| SQ | Acetophenone | UBIAD1   | 22.373 |
| SQ | Acetophenone | CYP11B1  | 80.882 |
| SQ | Acetophenone | CACNA1H  | 55.444 |



|    |              |          |        |
|----|--------------|----------|--------|
| SQ | Acetophenone | NAMPT    | 22.373 |
| SQ | Acetophenone | MAPK9    | 22.373 |
| SQ | Acetophenone | SLC6A4   | 22.373 |
| SQ | Acetophenone | WNT11    | 22.373 |
| SQ | Acetophenone | SNCA     | 22.373 |
| SQ | Acetophenone | CBR1     | 22.373 |
| SQ | Acetophenone | PTGS1    | 80.882 |
| SQ | Acetophenone | LCT      | 55.444 |
| SQ | Acetophenone | RGCC     | 22.373 |
| SQ | Acetophenone | CYP4F2   | 22.373 |
| SQ | Acetophenone | BDKRB2   | 22.373 |
| SQ | Acetophenone | ALOX15B  | 22.373 |
| SQ | Acetophenone | CPLX2    | 22.373 |
| SQ | Acetophenone | PRDM16   | 22.373 |
| SQ | Acetophenone | PTGS2    | 80.882 |
| SQ | Acetophenone | VKORC1L1 | 55.444 |
| SQ | Acetophenone | FNDC5    | 22.373 |
| SQ | Acetophenone | CYP4F11  | 22.373 |
| SQ | Acetophenone | NEUROD2  | 22.373 |
| SQ | Acetophenone | CDC20    | 22.373 |
| SQ | Acetophenone | ALOX15   | 22.373 |
| SQ | Acetophenone | CCM2L    | 22.373 |
| SQ | Encocalin    | ADRA1A   | 80.882 |
| SQ | Encocalin    | ADRA1B   | 80.882 |
| SQ | Encocalin    | YWHAE    | 55.444 |
| SQ | Encocalin    | CALCA    | 55.444 |
| SQ | Encocalin    | RNASE3   | 23     |
| SQ | Encocalin    | DNAJA1   | 22.373 |
| SQ | Encocalin    | CETN1    | 22.373 |
| SQ | Encocalin    | PDE4D    | 22.373 |
| SQ | Encocalin    | HSPA1A   | 22.373 |
| SQ | Encocalin    | KCNE2    | 22.373 |
| SQ | Encocalin    | NOS1     | 22.373 |
| SQ | Encocalin    | RXRA     | 22.373 |
| SQ | Encocalin    | ADRA2A   | 80.882 |
| SQ | Encocalin    | KCNH7    | 80.882 |
| SQ | Encocalin    | CHRNA7   | 55.444 |
| SQ | Encocalin    | NFKB1    | 23     |
| SQ | Encocalin    | MUC2     | 23     |
| SQ | Encocalin    | ADRB2    | 22.373 |
| SQ | Encocalin    | TRPV1    | 22.373 |
| SQ | Encocalin    | SREBF1   | 22.373 |
| SQ | Encocalin    | DRD5     | 22.373 |
| SQ | Encocalin    | ADORA1   | 22.373 |
| SQ | Encocalin    | KCNQ1    | 22.373 |
| SQ | Encocalin    | TPM1     | 22.373 |
| SQ | Encocalin    | KCNH6    | 80.882 |
| SQ | Encocalin    | ADRA2B   | 80.882 |
| SQ | Encocalin    | INS      | 55.444 |
| SQ | Encocalin    | PDE3A    | 23     |
| SQ | Encocalin    | IL5      | 23     |

|    |                        |          |         |
|----|------------------------|----------|---------|
| SQ | Encecalin              | GSK3A    | 22.373  |
| SQ | Encecalin              | TRIB1    | 22.373  |
| SQ | Encecalin              | SDCBP    | 22.373  |
| SQ | Encecalin              | ATP2B4   | 22.373  |
| SQ | Encecalin              | ADAM17   | 22.373  |
| SQ | Encecalin              | RGS2     | 22.373  |
| SQ | Encecalin              | EDN2     | 22.373  |
| SQ | Encecalin              | ADRA1D   | 80.882  |
| SQ | Encecalin              | PHKG2    | 55.444  |
| SQ | Encecalin              | ADRA2C   | 55.444  |
| SQ | Encecalin              | CYSLTR1  | 23      |
| SQ | Encecalin              | NOS1AP   | 22.373  |
| SQ | Encecalin              | CETN2    | 22.373  |
| SQ | Encecalin              | ARRB2    | 22.373  |
| SQ | Encecalin              | ARRB1    | 22.373  |
| SQ | Encecalin              | ARRDC3   | 22.373  |
| SQ | Encecalin              | PINK1    | 22.373  |
| SQ | Encecalin              | TRPM8    | 22.373  |
| SQ | Encecalin              | KCNE1    | 22.373  |
| SQ | Encecalin              | KCNH2    | 80.882  |
| SQ | Encecalin              | APLP1    | 55.444  |
| SQ | Encecalin              | NPPA     | 55.444  |
| SQ | Encecalin              | TNF      | 23      |
| SQ | Encecalin              | NAV2     | 22.373  |
| SQ | Encecalin              | HSPA1B   | 22.373  |
| SQ | Encecalin              | ADRB1    | 22.373  |
| SQ | Encecalin              | NCOA3    | 22.373  |
| SQ | Encecalin              | LTA      | 22.373  |
| SQ | Encecalin              | ADRB3    | 22.373  |
| SQ | Encecalin              | HSPA8    | 22.373  |
| SQ | Encecalin              | TRPA1    | 22.373  |
| SQ | 20-Hexadecanoylingenol | PRKCA    | 122.778 |
| SQ | 20-Hexadecanoylingenol | CD300A   | 22.373  |
| SQ | 20-Hexadecanoylingenol | PRKCD    | 122.778 |
| SQ | 20-Hexadecanoylingenol | CHGA     | 22.373  |
| SQ | 20-Hexadecanoylingenol | PTGER4   | 23      |
| SQ | 20-Hexadecanoylingenol | APOC2    | 22.373  |
| SQ | 20-Hexadecanoylingenol | PTGER2   | 23      |
| SQ | 20-Hexadecanoylingenol | KIF14    | 22.373  |
| SQ | 20-Hexadecanoylingenol | PTGER3   | 23      |
| SQ | 20-Hexadecanoylingenol | PRKCB    | 22.373  |
| SQ | Notoginsenoside R2     | ATP1A1   | 48      |
| SQ | Elemicin               | PDE4A    | 80.882  |
| SQ | Elemicin               | DHFR     | 80.882  |
| SQ | Elemicin               | PDE3B    | 55.444  |
| SQ | Elemicin               | PDE5A    | 22.373  |
| SQ | Elemicin               | INSR     | 22.373  |
| SQ | Elemicin               | DPYD     | 22.373  |
| SQ | Elemicin               | ADK      | 22.373  |
| SQ | Elemicin               | GAS6     | 22.373  |
| SQ | Elemicin               | HSP90AB1 | 22.373  |

|    |          |          |        |
|----|----------|----------|--------|
| SQ | Elemicin | ATIC     | 22.373 |
| SQ | Elemicin | RAB8B    | 22.373 |
| SQ | Elemicin | PARP10   | 22.373 |
| SQ | Elemicin | HCN2     | 22.373 |
| SQ | Elemicin | PDE3A    | 80.882 |
| SQ | Elemicin | PDE10A   | 80.882 |
| SQ | Elemicin | DMTN     | 55.444 |
| SQ | Elemicin | PDE9A    | 22.373 |
| SQ | Elemicin | P2RX2    | 22.373 |
| SQ | Elemicin | HOXA5    | 22.373 |
| SQ | Elemicin | IL1B     | 22.373 |
| SQ | Elemicin | CMPK2    | 22.373 |
| SQ | Elemicin | CHRN2    | 22.373 |
| SQ | Elemicin | AK9      | 22.373 |
| SQ | Elemicin | HYAL2    | 22.373 |
| SQ | Elemicin | CHRN4    | 22.373 |
| SQ | Elemicin | CACNA1C  | 80.882 |
| SQ | Elemicin | PDE2A    | 80.882 |
| SQ | Elemicin | KCNMA1   | 55.444 |
| SQ | Elemicin | TBPL1    | 22.373 |
| SQ | Elemicin | HTR2A    | 22.373 |
| SQ | Elemicin | FBLN1    | 22.373 |
| SQ | Elemicin | NT5M     | 22.373 |
| SQ | Elemicin | PDE1B    | 22.373 |
| SQ | Elemicin | SLC6A4   | 22.373 |
| SQ | Elemicin | CDKN1A   | 22.373 |
| SQ | Elemicin | DNMT3B   | 22.373 |
| SQ | Elemicin | MGMT     | 22.373 |
| SQ | Elemicin | TRDMT1   | 80.882 |
| SQ | Elemicin | TYMS     | 80.882 |
| SQ | Elemicin | ABCC2    | 22.373 |
| SQ | Elemicin | DNMT3A   | 22.373 |
| SQ | Elemicin | SIRT2    | 22.373 |
| SQ | Elemicin | SLC22A6  | 22.373 |
| SQ | Elemicin | P2RX3    | 22.373 |
| SQ | Elemicin | DPYS     | 22.373 |
| SQ | Elemicin | DUT      | 22.373 |
| SQ | Elemicin | HIF1A    | 22.373 |
| SQ | Elemicin | HSP90AA1 | 22.373 |
| SQ | Elemicin | DTYMK    | 22.373 |
| SQ | Elemicin | DHFRL1   | 80.882 |
| SQ | Elemicin | SHMT1    | 55.444 |
| SQ | Elemicin | FOLR2    | 22.373 |
| SQ | Elemicin | STUB1    | 22.373 |
| SQ | Elemicin | HCN4     | 22.373 |
| SQ | Elemicin | ASNS     | 22.373 |
| SQ | Elemicin | AURKA    | 22.373 |
| SQ | Elemicin | CHRNA3   | 22.373 |
| SQ | Elemicin | RAPGEF2  | 22.373 |
| SQ | Elemicin | FOLR1    | 22.373 |
| SQ | Elemicin | DNMT1    | 22.373 |

|    |                 |         |        |
|----|-----------------|---------|--------|
| SQ | Elemicin        | PDE11A  | 22.373 |
| SQ | Sanchinoside B1 | NR3C1   | 48     |
| SQ | Sanchinoside B1 | ATP1A1  | 48     |
| SQ | Alpha-Cuparenol | S1PR5   | 48     |
| SQ | Alpha-Cuparenol | ESR2    | 48     |
| SQ | Alpha-Cuparenol | ESR1    | 48     |
| SQ | Alpha-Cuparenol | NR1I2   | 48     |
| SQ | Cyclododecanone | SCN11A  | 48     |
| SQ | Cyclododecanone | SCN3A   | 48     |
| SQ | Cyclododecanone | ALDH5A1 | 48     |
| SQ | Cyclododecanone | SCN4A   | 48     |
| SQ | Cyclododecanone | SCN1B   | 48     |
| SQ | Cyclododecanone | SCN2B   | 48     |
| SQ | Cyclododecanone | SCN7A   | 48     |
| SQ | Cyclododecanone | SCN2A   | 48     |
| SQ | Cyclododecanone | SCN4B   | 48     |
| SQ | Cyclododecanone | OGDH    | 48     |
| SQ | Cyclododecanone | ABAT    | 48     |
| SQ | Cyclododecanone | SCN5A   | 48     |
| SQ | Cyclododecanone | HDAC9   | 48     |
| SQ | Cyclododecanone | SRD5A2  | 48     |
| SQ | Cyclododecanone | HDAC2   | 48     |
| SQ | Cyclododecanone | SCN1A   | 48     |
| SQ | Cyclododecanone | SCN10A  | 48     |
| SQ | Cyclododecanone | TYR     | 48     |
| SQ | Cyclododecanone | ACADSB  | 48     |
| SQ | Cyclododecanone | SCN3B   | 48     |
| SQ | Cyclododecanone | AKR1D1  | 48     |
| SQ | Cyclododecanone | SCN9A   | 48     |
| SQ | Cyclododecanone | SCN8A   | 48     |
| SQ | Stigmasterol    | KCND1   | 80.882 |
| SQ | Stigmasterol    | GAMT    | 80.882 |
| SQ | Stigmasterol    | CAT     | 80.882 |
| SQ | Stigmasterol    | KCNC1   | 80.882 |
| SQ | Stigmasterol    | KCND2   | 80.882 |
| SQ | Stigmasterol    | KCND3   | 80.882 |
| SQ | Stigmasterol    | KCNQ1   | 55.444 |
| SQ | Stigmasterol    | RDH13   | 48     |
| SQ | Stigmasterol    | ALDH1A3 | 48     |
| SQ | Stigmasterol    | ALDH1A1 | 48     |
| SQ | Stigmasterol    | ALDH1A2 | 48     |
| SQ | Stigmasterol    | NFIB    | 22.373 |
| SQ | Stigmasterol    | ARX     | 22.373 |
| SQ | Stigmasterol    | NRXN1   | 22.373 |
| SQ | Stigmasterol    | SOX15   | 22.373 |
| SQ | Stigmasterol    | IL1B    | 22.373 |
| SQ | Stigmasterol    | SCN10A  | 22.373 |
| SQ | Stigmasterol    | GPX7    | 22.373 |
| SQ | Stigmasterol    | OXTR    | 22.373 |
| SQ | Stigmasterol    | RAPGEF2 | 22.373 |
| SQ | Stigmasterol    | NKX2-1  | 22.373 |

|    |              |         |        |
|----|--------------|---------|--------|
| SQ | Stigmasterol | NPPA    | 22.373 |
| SQ | Stigmasterol | RNASE2  | 22.373 |
| SQ | Stigmasterol | FAS     | 22.373 |
| SQ | Stigmasterol | KCNA3   | 80.882 |
| SQ | Stigmasterol | KCNC3   | 80.882 |
| SQ | Stigmasterol | KCNB1   | 80.882 |
| SQ | Stigmasterol | ADH1C   | 80.882 |
| SQ | Stigmasterol | ALDH2   | 80.882 |
| SQ | Stigmasterol | GUCY1B3 | 55.444 |
| SQ | Stigmasterol | RDH11   | 48     |
| SQ | Stigmasterol | DHRS3   | 48     |
| SQ | Stigmasterol | RDH12   | 48     |
| SQ | Stigmasterol | RLBP1   | 48     |
| SQ | Stigmasterol | NR3C2   | 48     |
| SQ | Stigmasterol | CYGB    | 22.373 |
| SQ | Stigmasterol | IGF1    | 22.373 |
| SQ | Stigmasterol | EDN1    | 22.373 |
| SQ | Stigmasterol | CNTNAP4 | 22.373 |
| SQ | Stigmasterol | GRIN2A  | 22.373 |
| SQ | Stigmasterol | SPARC   | 22.373 |
| SQ | Stigmasterol | CRLF1   | 22.373 |
| SQ | Stigmasterol | ALDH1B1 | 22.373 |
| SQ | Stigmasterol | DARS    | 22.373 |
| SQ | Stigmasterol | MIP     | 22.373 |
| SQ | Stigmasterol | STX1A   | 22.373 |
| SQ | Stigmasterol | NRXN2   | 22.373 |
| SQ | Stigmasterol | DAB2IP  | 22.373 |
| SQ | Stigmasterol | PRKAB1  | 80.882 |
| SQ | Stigmasterol | KCNA1   | 80.882 |
| SQ | Stigmasterol | ADH1B   | 80.882 |
| SQ | Stigmasterol | KCNB2   | 80.882 |
| SQ | Stigmasterol | KCNA4   | 80.882 |
| SQ | Stigmasterol | GATM    | 55.444 |
| SQ | Stigmasterol | RBP3    | 48     |
| SQ | Stigmasterol | RDH5    | 48     |
| SQ | Stigmasterol | OPRK1   | 48     |
| SQ | Stigmasterol | RDH14   | 48     |
| SQ | Stigmasterol | FBP1    | 22.373 |
| SQ | Stigmasterol | NRXN3   | 22.373 |
| SQ | Stigmasterol | SHANK3  | 22.373 |
| SQ | Stigmasterol | OXT     | 22.373 |
| SQ | Stigmasterol | RNASE4  | 22.373 |
| SQ | Stigmasterol | SLC17A7 | 22.373 |
| SQ | Stigmasterol | SORCS3  | 22.373 |
| SQ | Stigmasterol | FADD    | 22.373 |
| SQ | Stigmasterol | LEP     | 22.373 |
| SQ | Stigmasterol | ANK3    | 22.373 |
| SQ | Stigmasterol | RYR3    | 22.373 |
| SQ | Stigmasterol | PAXBP1  | 22.373 |
| SQ | Stigmasterol | ADORA1  | 22.373 |
| SQ | Stigmasterol | CYP2E1  | 22.373 |

|    |              |         |        |
|----|--------------|---------|--------|
| SQ | Stigmasterol | ADH1A   | 80.882 |
| SQ | Stigmasterol | KCNA2   | 80.882 |
| SQ | Stigmasterol | DLG4    | 80.882 |
| SQ | Stigmasterol | KCNA5   | 80.882 |
| SQ | Stigmasterol | KCNA7   | 80.882 |
| SQ | Stigmasterol | KCNK4   | 55.444 |
| SQ | Stigmasterol | RETSAT  | 48     |
| SQ | Stigmasterol | ESR1    | 48     |
| SQ | Stigmasterol | DHRS4   | 48     |
| SQ | Stigmasterol | RDH8    | 48     |
| SQ | Stigmasterol | DGKI    | 22.373 |
| SQ | Stigmasterol | LRRC4B  | 22.373 |
| SQ | Stigmasterol | ACY3    | 22.373 |
| SQ | Stigmasterol | MAGI2   | 22.373 |
| SQ | Stigmasterol | RAB3A   | 22.373 |
| SQ | Stigmasterol | CYP11A1 | 22.373 |
| SQ | Stigmasterol | RNASE8  | 22.373 |
| SQ | Stigmasterol | SNTG2   | 22.373 |
| SQ | Stigmasterol | NLGN1   | 22.373 |
| SQ | Stigmasterol | KCNE5   | 22.373 |
| SQ | Stigmasterol | ZPR1    | 22.373 |
| SQ | Stigmasterol | PAX7    | 22.373 |
| SQ | Stigmasterol | ADH4    | 22.373 |
| SQ | Stigmasterol | ACY1    | 22.373 |
| SQ | Stigmasterol | KCNA10  | 80.882 |
| SQ | Stigmasterol | TPO     | 80.882 |
| SQ | Stigmasterol | KCNC2   | 80.882 |
| SQ | Stigmasterol | RNASE1  | 80.882 |
| SQ | Stigmasterol | KCNA6   | 80.882 |
| SQ | Stigmasterol | IYD     | 55.444 |
| SQ | Stigmasterol | CYP17A1 | 48     |
| SQ | Stigmasterol | PGR     | 48     |
| SQ | Stigmasterol | RBP1    | 48     |
| SQ | Stigmasterol | LRAT    | 48     |
| SQ | Stigmasterol | ADH7    | 22.373 |
| SQ | Stigmasterol | AQP8    | 22.373 |
| SQ | Stigmasterol | ASPA    | 22.373 |
| SQ | Stigmasterol | APOE    | 22.373 |
| SQ | Stigmasterol | MC4R    | 22.373 |
| SQ | Stigmasterol | SCN5A   | 22.373 |
| SQ | Stigmasterol | KCNIP2  | 22.373 |
| SQ | Stigmasterol | SCGB1A1 | 22.373 |
| SQ | Stigmasterol | CACNA1D | 22.373 |
| SQ | Stigmasterol | PPARD   | 22.373 |
| SQ | Stigmasterol | ALDH3B1 | 22.373 |
| SQ | Stigmasterol | ALDH3B2 | 22.373 |
| SQ | Stigmasterol | GJA5    | 22.373 |
| SQ | Panaxatriol  | AR      | 48     |
| SQ | Panaxatriol  | GUCY1A2 | 23     |
| SQ | Panaxadiol   | AR      | 48     |
| SQ | Panaxadiol   | GUCY1A2 | 23     |

|    |                   |          |         |
|----|-------------------|----------|---------|
| SQ | Heneicosanic Acid | AKR1D1   | 686     |
| SQ | Heneicosanic Acid | ABAT     | 122.778 |
| SQ | Heneicosanic Acid | COX5B    | 122.778 |
| SQ | Heneicosanic Acid | SCN7A    | 122.778 |
| SQ | Heneicosanic Acid | COX5A    | 122.778 |
| SQ | Heneicosanic Acid | COX4I1   | 122.778 |
| SQ | Heneicosanic Acid | SCN4A    | 122.778 |
| SQ | Heneicosanic Acid | CES1     | 122.778 |
| SQ | Heneicosanic Acid | COX2     | 122.778 |
| SQ | Heneicosanic Acid | SUCLG2   | 80.882  |
| SQ | Heneicosanic Acid | SLC25A10 | 80.882  |
| SQ | Heneicosanic Acid | SUCNR1   | 80.882  |
| SQ | Heneicosanic Acid | OXCT1    | 80.882  |
| SQ | Heneicosanic Acid | SDHA     | 80.882  |
| SQ | Heneicosanic Acid | DCT      | 55.444  |
| SQ | Heneicosanic Acid | JMJD6    | 55.444  |
| SQ | Heneicosanic Acid | HSD17B11 | 55.444  |
| SQ | Heneicosanic Acid | P4HB     | 55.444  |
| SQ | Heneicosanic Acid | GRIN3B   | 48      |
| SQ | Heneicosanic Acid | CACNA1B  | 48      |
| SQ | Heneicosanic Acid | GRIN3A   | 48      |
| SQ | Heneicosanic Acid | GRIN1    | 48      |
| SQ | Heneicosanic Acid | SIRT1    | 22.373  |
| SQ | Heneicosanic Acid | SIX1     | 22.373  |
| SQ | Heneicosanic Acid | OSBPL8   | 22.373  |
| SQ | Heneicosanic Acid | UBE2B    | 22.373  |
| SQ | Heneicosanic Acid | STIM2    | 22.373  |
| SQ | Heneicosanic Acid | COLGALT1 | 22.373  |
| SQ | Heneicosanic Acid | ARID1A   | 22.373  |
| SQ | Heneicosanic Acid | ACOT4    | 22.373  |
| SQ | Heneicosanic Acid | SLC25A12 | 22.373  |
| SQ | Heneicosanic Acid | CDH11    | 22.373  |
| SQ | Heneicosanic Acid | BDKRB2   | 22.373  |
| SQ | Heneicosanic Acid | SMAD7    | 22.373  |
| SQ | Heneicosanic Acid | WNT10B   | 22.373  |
| SQ | Heneicosanic Acid | STAR     | 22.373  |
| SQ | Heneicosanic Acid | CAMK2D   | 22.373  |
| SQ | Heneicosanic Acid | HTT      | 22.373  |
| SQ | Heneicosanic Acid | TST      | 22.373  |
| SQ | Heneicosanic Acid | TMEM110  | 22.373  |
| SQ | Heneicosanic Acid | EPHA4    | 22.373  |
| SQ | Heneicosanic Acid | EDA      | 22.373  |
| SQ | Heneicosanic Acid | KCNQ1    | 22.373  |
| SQ | Heneicosanic Acid | UGT1A1   | 22.373  |
| SQ | Heneicosanic Acid | PLOD2    | 22.373  |
| SQ | Heneicosanic Acid | SLC25A1  | 22.373  |
| SQ | Heneicosanic Acid | TYR      | 686     |
| SQ | Heneicosanic Acid | SCN1A    | 122.778 |
| SQ | Heneicosanic Acid | COX7C    | 122.778 |
| SQ | Heneicosanic Acid | SCN5A    | 122.778 |
| SQ | Heneicosanic Acid | COX3     | 122.778 |

|    |                   |          |         |
|----|-------------------|----------|---------|
| SQ | Heneicosanic Acid | HDAC9    | 122.778 |
| SQ | Heneicosanic Acid | SCN4B    | 122.778 |
| SQ | Heneicosanic Acid | ACADSB   | 122.778 |
| SQ | Heneicosanic Acid | OGDH     | 122.778 |
| SQ | Heneicosanic Acid | SLC13A2  | 80.882  |
| SQ | Heneicosanic Acid | P3H3     | 80.882  |
| SQ | Heneicosanic Acid | SLC13A3  | 80.882  |
| SQ | Heneicosanic Acid | PLOD3    | 80.882  |
| SQ | Heneicosanic Acid | P4HA2    | 80.882  |
| SQ | Heneicosanic Acid | AKR1C3   | 55.444  |
| SQ | Heneicosanic Acid | SLC13A4  | 55.444  |
| SQ | Heneicosanic Acid | TYRP1    | 55.444  |
| SQ | Heneicosanic Acid | CACNA2D1 | 48      |
| SQ | Heneicosanic Acid | CACNA2D2 | 48      |
| SQ | Heneicosanic Acid | GRIN2C   | 48      |
| SQ | Heneicosanic Acid | SLC7A1   | 48      |
| SQ | Heneicosanic Acid | HDAC1    | 23      |
| SQ | Heneicosanic Acid | SHMT1    | 22.373  |
| SQ | Heneicosanic Acid | BDH1     | 22.373  |
| SQ | Heneicosanic Acid | SPI1     | 22.373  |
| SQ | Heneicosanic Acid | CYP1A2   | 22.373  |
| SQ | Heneicosanic Acid | PKD2     | 22.373  |
| SQ | Heneicosanic Acid | NEDD4    | 22.373  |
| SQ | Heneicosanic Acid | EGLN2    | 22.373  |
| SQ | Heneicosanic Acid | PHGDH    | 22.373  |
| SQ | Heneicosanic Acid | YBX3     | 22.373  |
| SQ | Heneicosanic Acid | CACNA1D  | 22.373  |
| SQ | Heneicosanic Acid | PRPH     | 22.373  |
| SQ | Heneicosanic Acid | PRDM8    | 22.373  |
| SQ | Heneicosanic Acid | OGFOD1   | 22.373  |
| SQ | Heneicosanic Acid | DLST     | 22.373  |
| SQ | Heneicosanic Acid | AP3D1    | 22.373  |
| SQ | Heneicosanic Acid | IL10     | 22.373  |
| SQ | Heneicosanic Acid | SLC1A6   | 22.373  |
| SQ | Heneicosanic Acid | CDC42    | 22.373  |
| SQ | Heneicosanic Acid | OCA2     | 22.373  |
| SQ | Heneicosanic Acid | HACL1    | 22.373  |
| SQ | Heneicosanic Acid | CASQ2    | 22.373  |
| SQ | Heneicosanic Acid | DLD      | 22.373  |
| SQ | Heneicosanic Acid | CYP1A1   | 22.373  |
| SQ | Heneicosanic Acid | SRD5A2   | 686     |
| SQ | Heneicosanic Acid | ESRRG    | 122.778 |
| SQ | Heneicosanic Acid | COX1     | 122.778 |
| SQ | Heneicosanic Acid | SCN10A   | 122.778 |
| SQ | Heneicosanic Acid | AR       | 122.778 |
| SQ | Heneicosanic Acid | PLA2G1B  | 122.778 |
| SQ | Heneicosanic Acid | ADH1C    | 122.778 |
| SQ | Heneicosanic Acid | SCN8A    | 122.778 |
| SQ | Heneicosanic Acid | HDAC2    | 122.778 |
| SQ | Heneicosanic Acid | SLC13A1  | 80.882  |
| SQ | Heneicosanic Acid | OXCT2    | 80.882  |



|    |                   |          |         |
|----|-------------------|----------|---------|
| SQ | Heneicosanic Acid | ASPH     | 80.882  |
| SQ | Heneicosanic Acid | P4HA1    | 80.882  |
| SQ | Heneicosanic Acid | SUCLA2   | 80.882  |
| SQ | Heneicosanic Acid | CRTAP    | 55.444  |
| SQ | Heneicosanic Acid | SDHAF2   | 55.444  |
| SQ | Heneicosanic Acid | HIF1AN   | 55.444  |
| SQ | Heneicosanic Acid | PLAT     | 48      |
| SQ | Heneicosanic Acid | GRIN2A   | 48      |
| SQ | Heneicosanic Acid | GRIN2B   | 48      |
| SQ | Heneicosanic Acid | SLC7A4   | 48      |
| SQ | Heneicosanic Acid | GPD1L    | 22.373  |
| SQ | Heneicosanic Acid | SUGCT    | 22.373  |
| SQ | Heneicosanic Acid | COLGALT2 | 22.373  |
| SQ | Heneicosanic Acid | SUOX     | 22.373  |
| SQ | Heneicosanic Acid | CCL5     | 22.373  |
| SQ | Heneicosanic Acid | ALDH9A1  | 22.373  |
| SQ | Heneicosanic Acid | CYP11A1  | 22.373  |
| SQ | Heneicosanic Acid | ACAT1    | 22.373  |
| SQ | Heneicosanic Acid | PNLIPRP2 | 22.373  |
| SQ | Heneicosanic Acid | 8-Mar    | 22.373  |
| SQ | Heneicosanic Acid | DDC      | 22.373  |
| SQ | Heneicosanic Acid | BCKDHB   | 22.373  |
| SQ | Heneicosanic Acid | UROD     | 22.373  |
| SQ | Heneicosanic Acid | SLC38A7  | 22.373  |
| SQ | Heneicosanic Acid | PF4      | 22.373  |
| SQ | Heneicosanic Acid | MYO5A    | 22.373  |
| SQ | Heneicosanic Acid | EGLN3    | 22.373  |
| SQ | Heneicosanic Acid | NPPA     | 22.373  |
| SQ | Heneicosanic Acid | ARHGEF2  | 22.373  |
| SQ | Heneicosanic Acid | HSD17B8  | 22.373  |
| SQ | Heneicosanic Acid | RYR2     | 22.373  |
| SQ | Heneicosanic Acid | GJA5     | 22.373  |
| SQ | Heneicosanic Acid | GNAS     | 22.373  |
| SQ | Heneicosanic Acid | SULT2A1  | 22.373  |
| SQ | Heneicosanic Acid | SCN11A   | 122.778 |
| SQ | Heneicosanic Acid | SCN3B    | 122.778 |
| SQ | Heneicosanic Acid | SCN3A    | 122.778 |
| SQ | Heneicosanic Acid | ALDH5A1  | 122.778 |
| SQ | Heneicosanic Acid | COX7A1   | 122.778 |
| SQ | Heneicosanic Acid | COX6A2   | 122.778 |
| SQ | Heneicosanic Acid | COX6B1   | 122.778 |
| SQ | Heneicosanic Acid | COX7B    | 122.778 |
| SQ | Heneicosanic Acid | COX8A    | 122.778 |
| SQ | Heneicosanic Acid | SUCLG1   | 80.882  |
| SQ | Heneicosanic Acid | TMLHE    | 80.882  |
| SQ | Heneicosanic Acid | BBOX1    | 80.882  |
| SQ | Heneicosanic Acid | SDHC     | 80.882  |
| SQ | Heneicosanic Acid | SDHD     | 80.882  |
| SQ | Heneicosanic Acid | SLIT2    | 55.444  |
| SQ | Heneicosanic Acid | SLC1A3   | 55.444  |
| SQ | Heneicosanic Acid | UROS     | 55.444  |

|    |                   |          |         |
|----|-------------------|----------|---------|
| SQ | Heneicosanic Acid | SLC7A2   | 48      |
| SQ | Heneicosanic Acid | TOP1     | 48      |
| SQ | Heneicosanic Acid | SLC7A3   | 48      |
| SQ | Heneicosanic Acid | GRIN2D   | 48      |
| SQ | Heneicosanic Acid | SRD5A1   | 22.373  |
| SQ | Heneicosanic Acid | ACSS2    | 22.373  |
| SQ | Heneicosanic Acid | SIX4     | 22.373  |
| SQ | Heneicosanic Acid | CCL2     | 22.373  |
| SQ | Heneicosanic Acid | ANK2     | 22.373  |
| SQ | Heneicosanic Acid | TH       | 22.373  |
| SQ | Heneicosanic Acid | DHODH    | 22.373  |
| SQ | Heneicosanic Acid | GALC     | 22.373  |
| SQ | Heneicosanic Acid | CYP39A1  | 22.373  |
| SQ | Heneicosanic Acid | STIM1    | 22.373  |
| SQ | Heneicosanic Acid | DHTKD1   | 22.373  |
| SQ | Heneicosanic Acid | KCNE5    | 22.373  |
| SQ | Heneicosanic Acid | UGT8     | 22.373  |
| SQ | Heneicosanic Acid | ACSS1    | 22.373  |
| SQ | Heneicosanic Acid | CRACR2A  | 22.373  |
| SQ | Heneicosanic Acid | ILVBL    | 22.373  |
| SQ | Heneicosanic Acid | OGDHL    | 22.373  |
| SQ | Heneicosanic Acid | ACADM    | 22.373  |
| SQ | Heneicosanic Acid | EGLN1    | 22.373  |
| SQ | Heneicosanic Acid | CTNNB1   | 22.373  |
| SQ | Heneicosanic Acid | HAP1     | 22.373  |
| SQ | Heneicosanic Acid | DHRS9    | 22.373  |
| SQ | Heneicosanic Acid | SLC25A13 | 22.373  |
| SQ | Heneicosanic Acid | NFX1     | 22.373  |
| SQ | Heneicosanic Acid | SCN2B    | 122.778 |
| SQ | Heneicosanic Acid | COX6C    | 122.778 |
| SQ | Heneicosanic Acid | AKR1C2   | 122.778 |
| SQ | Heneicosanic Acid | SCN2A    | 122.778 |
| SQ | Heneicosanic Acid | FECH     | 122.778 |
| SQ | Heneicosanic Acid | SCN9A    | 122.778 |
| SQ | Heneicosanic Acid | FABP6    | 122.778 |
| SQ | Heneicosanic Acid | SCN1B    | 122.778 |
| SQ | Heneicosanic Acid | NR1H4    | 122.778 |
| SQ | Heneicosanic Acid | HSD17B6  | 80.882  |
| SQ | Heneicosanic Acid | PLOD1    | 80.882  |
| SQ | Heneicosanic Acid | SDHB     | 80.882  |
| SQ | Heneicosanic Acid | P3H2     | 80.882  |
| SQ | Heneicosanic Acid | P3H1     | 80.882  |
| SQ | Heneicosanic Acid | ACO2     | 55.444  |
| SQ | Heneicosanic Acid | SALL1    | 55.444  |
| SQ | Heneicosanic Acid | SLC13A5  | 55.444  |
| SQ | Heneicosanic Acid | CACNA1A  | 48      |
| SQ | Heneicosanic Acid | PLG      | 48      |
| SQ | Heneicosanic Acid | KARS     | 48      |
| SQ | Heneicosanic Acid | ADORA1   | 48      |
| SQ | Heneicosanic Acid | FBXO45   | 22.373  |
| SQ | Heneicosanic Acid | ARV1     | 22.373  |

|    |                   |          |        |
|----|-------------------|----------|--------|
| SQ | Heneicosanic Acid | MRPS36   | 22.373 |
| SQ | Heneicosanic Acid | BCKDK    | 22.373 |
| SQ | Heneicosanic Acid | HSD17B2  | 22.373 |
| SQ | Heneicosanic Acid | EPO      | 22.373 |
| SQ | Heneicosanic Acid | CLN3     | 22.373 |
| SQ | Heneicosanic Acid | PLCG2    | 22.373 |
| SQ | Heneicosanic Acid | BCKDHA   | 22.373 |
| SQ | Heneicosanic Acid | GAL3ST1  | 22.373 |
| SQ | Heneicosanic Acid | NEDD4L   | 22.373 |
| SQ | Heneicosanic Acid | SRD5A3   | 22.373 |
| SQ | Heneicosanic Acid | ETHE1    | 22.373 |
| SQ | Heneicosanic Acid | CYP4B1   | 22.373 |
| SQ | Heneicosanic Acid | HSD17B1  | 22.373 |
| SQ | Heneicosanic Acid | CAV3     | 22.373 |
| SQ | Heneicosanic Acid | KCNA5    | 22.373 |
| SQ | Heneicosanic Acid | SQRDL    | 22.373 |
| SQ | Heneicosanic Acid | ETFDH    | 22.373 |
| SQ | Heneicosanic Acid | P4HA3    | 22.373 |
| SQ | Heneicosanic Acid | PCSK9    | 22.373 |
| SQ | Heneicosanic Acid | GPR143   | 22.373 |
| SQ | Heneicosanic Acid | SFXN5    | 22.373 |
| SQ | Heneicosanic Acid | DBT      | 22.373 |
| SQ | Coprine           | SLC1A5   | 80.882 |
| SQ | Coprine           | SHMT1    | 80.882 |
| SQ | Coprine           | SLC7A8   | 80.882 |
| SQ | Coprine           | GLRA2    | 80.882 |
| SQ | Coprine           | VAR5     | 80.882 |
| SQ | Coprine           | VDAC3    | 80.882 |
| SQ | Coprine           | GRIN3B   | 80.882 |
| SQ | Coprine           | GLRB     | 80.882 |
| SQ | Coprine           | CTPS1    | 80.882 |
| SQ | Coprine           | LARS     | 80.882 |
| SQ | Coprine           | GRIN2C   | 80.882 |
| SQ | Coprine           | PIPOX    | 80.882 |
| SQ | Coprine           | SHMT2    | 80.882 |
| SQ | Coprine           | ASRGL1   | 80.882 |
| SQ | Coprine           | AGXT     | 80.882 |
| SQ | Coprine           | SLC7A1   | 80.882 |
| SQ | Coprine           | CAD      | 80.882 |
| SQ | Coprine           | ARG2     | 80.882 |
| SQ | Coprine           | SLC25A13 | 80.882 |
| SQ | Coprine           | NARS     | 80.882 |
| SQ | Coprine           | AZIN2    | 55.444 |
| SQ | Coprine           | SLC26A6  | 55.444 |
| SQ | Coprine           | ALDH5A1  | 55.444 |
| SQ | Coprine           | HLCS     | 55.444 |
| SQ | Coprine           | HIF1AN   | 55.444 |
| SQ | Coprine           | TNNT2    | 55.444 |
| SQ | Coprine           | PLAT     | 23     |
| SQ | Coprine           | TH       | 23     |
| SQ | Coprine           | NOS2     | 23     |

|    |         |          |        |
|----|---------|----------|--------|
| SQ | Coprine | FARS2    | 23     |
| SQ | Coprine | BHMT     | 23     |
| SQ | Coprine | FARSB    | 23     |
| SQ | Coprine | NOS3     | 23     |
| SQ | Coprine | PADI6    | 23     |
| SQ | Coprine | DGKD     | 23     |
| SQ | Coprine | AIMP1    | 22.373 |
| SQ | Coprine | APIP     | 22.373 |
| SQ | Coprine | KLF9     | 22.373 |
| SQ | Coprine | PCMTD2   | 22.373 |
| SQ | Coprine | ACACB    | 22.373 |
| SQ | Coprine | TMLHE    | 22.373 |
| SQ | Coprine | SLC7A9   | 22.373 |
| SQ | Coprine | CDO1     | 22.373 |
| SQ | Coprine | STIM2    | 22.373 |
| SQ | Coprine | CD101    | 22.373 |
| SQ | Coprine | ACACA    | 22.373 |
| SQ | Coprine | ADI1     | 22.373 |
| SQ | Coprine | PSPH     | 22.373 |
| SQ | Coprine | ENOPH1   | 22.373 |
| SQ | Coprine | SLC13A3  | 22.373 |
| SQ | Coprine | ALDH18A1 | 22.373 |
| SQ | Coprine | MOCS3    | 22.373 |
| SQ | Coprine | BBOX1    | 22.373 |
| SQ | Coprine | QPRT     | 22.373 |
| SQ | Coprine | OPLAH    | 22.373 |
| SQ | Coprine | AARSD1   | 22.373 |
| SQ | Coprine | LEP      | 22.373 |
| SQ | Coprine | SLIT3    | 22.373 |
| SQ | Coprine | GAD1     | 22.373 |
| SQ | Coprine | GLS      | 22.373 |
| SQ | Coprine | AFMID    | 22.373 |
| SQ | Coprine | PSAT1    | 22.373 |
| SQ | Coprine | EARS2    | 22.373 |
| SQ | Coprine | DLST     | 22.373 |
| SQ | Coprine | NUDT3    | 22.373 |
| SQ | Coprine | TNNT3    | 22.373 |
| SQ | Coprine | LRRK2    | 22.373 |
| SQ | Coprine | SLC7A11  | 22.373 |
| SQ | Coprine | SMOX     | 22.373 |
| SQ | Coprine | GHR      | 22.373 |
| SQ | Coprine | EGLN1    | 22.373 |
| SQ | Coprine | PLCB1    | 22.373 |
| SQ | Coprine | CERS1    | 22.373 |
| SQ | Coprine | YARS2    | 22.373 |
| SQ | Coprine | HAP1     | 22.373 |
| SQ | Coprine | MOCS1    | 22.373 |
| SQ | Coprine | GLS2     | 22.373 |
| SQ | Coprine | MCEE     | 22.373 |
| SQ | Coprine | GOT2     | 80.882 |
| SQ | Coprine | ABAT     | 80.882 |

|    |         |          |        |
|----|---------|----------|--------|
| SQ | Coprine | PPAT     | 80.882 |
| SQ | Coprine | ALAS1    | 80.882 |
| SQ | Coprine | NFS1     | 80.882 |
| SQ | Coprine | GSS      | 80.882 |
| SQ | Coprine | LCMT1    | 80.882 |
| SQ | Coprine | GLYAT    | 80.882 |
| SQ | Coprine | SLC25A12 | 80.882 |
| SQ | Coprine | ARG1     | 80.882 |
| SQ | Coprine | OAT      | 80.882 |
| SQ | Coprine | SLC25A2  | 80.882 |
| SQ | Coprine | ALAS2    | 80.882 |
| SQ | Coprine | GLYATL2  | 80.882 |
| SQ | Coprine | LARS2    | 80.882 |
| SQ | Coprine | SLC36A1  | 80.882 |
| SQ | Coprine | PCCB     | 80.882 |
| SQ | Coprine | IARS     | 80.882 |
| SQ | Coprine | GLRA1    | 80.882 |
| SQ | Coprine | PCK1     | 55.444 |
| SQ | Coprine | GAMT     | 55.444 |
| SQ | Coprine | ISCU     | 55.444 |
| SQ | Coprine | BACE1    | 55.444 |
| SQ | Coprine | SLC1A3   | 55.444 |
| SQ | Coprine | CPS1     | 55.444 |
| SQ | Coprine | PISD     | 55.444 |
| SQ | Coprine | BHMT2    | 23     |
| SQ | Coprine | CACNA2D2 | 23     |
| SQ | Coprine | PTDSS1   | 23     |
| SQ | Coprine | PAH      | 23     |
| SQ | Coprine | DDAH1    | 23     |
| SQ | Coprine | GRIN3A   | 23     |
| SQ | Coprine | GSTP1    | 23     |
| SQ | Coprine | PADI1    | 23     |
| SQ | Coprine | ABCC2    | 22.373 |
| SQ | Coprine | GPHN     | 22.373 |
| SQ | Coprine | AUH      | 22.373 |
| SQ | Coprine | GAA      | 22.373 |
| SQ | Coprine | ACMSD    | 22.373 |
| SQ | Coprine | MTAP     | 22.373 |
| SQ | Coprine | GRM6     | 22.373 |
| SQ | Coprine | STAT5A   | 22.373 |
| SQ | Coprine | MOCOS    | 22.373 |
| SQ | Coprine | PKD2     | 22.373 |
| SQ | Coprine | ALDH9A1  | 22.373 |
| SQ | Coprine | ARMT1    | 22.373 |
| SQ | Coprine | NT5M     | 22.373 |
| SQ | Coprine | MTNR1B   | 22.373 |
| SQ | Coprine | CCBL2    | 22.373 |
| SQ | Coprine | CAT      | 22.373 |
| SQ | Coprine | HMBS     | 22.373 |
| SQ | Coprine | RNASE8   | 22.373 |
| SQ | Coprine | APRT     | 22.373 |

|    |         |          |        |
|----|---------|----------|--------|
| SQ | Coprine | WNT7B    | 22.373 |
| SQ | Coprine | CMPK2    | 22.373 |
| SQ | Coprine | MOCS2    | 22.373 |
| SQ | Coprine | MRI1     | 22.373 |
| SQ | Coprine | PYCR1    | 22.373 |
| SQ | Coprine | PKLR     | 22.373 |
| SQ | Coprine | SLC11A1  | 22.373 |
| SQ | Coprine | SLC3A1   | 22.373 |
| SQ | Coprine | TNNT1    | 22.373 |
| SQ | Coprine | HAAO     | 22.373 |
| SQ | Coprine | ATP1A2   | 22.373 |
| SQ | Coprine | CMPK1    | 22.373 |
| SQ | Coprine | RYR3     | 22.373 |
| SQ | Coprine | C2orf83  | 22.373 |
| SQ | Coprine | PI4K2A   | 22.373 |
| SQ | Coprine | CTNS     | 22.373 |
| SQ | Coprine | TMEM110  | 22.373 |
| SQ | Coprine | KMO      | 22.373 |
| SQ | Coprine | MMAA     | 22.373 |
| SQ | Coprine | RNASE2   | 22.373 |
| SQ | Coprine | PARK2    | 22.373 |
| SQ | Coprine | HPRT1    | 22.373 |
| SQ | Coprine | GRM7     | 22.373 |
| SQ | Coprine | PER2     | 22.373 |
| SQ | Coprine | GPT2     | 80.882 |
| SQ | Coprine | SLC1A1   | 80.882 |
| SQ | Coprine | ACY3     | 80.882 |
| SQ | Coprine | BCAT1    | 80.882 |
| SQ | Coprine | SLC25A15 | 80.882 |
| SQ | Coprine | ASNS     | 80.882 |
| SQ | Coprine | GRIN2A   | 80.882 |
| SQ | Coprine | AARS2    | 80.882 |
| SQ | Coprine | PHYKPL   | 80.882 |
| SQ | Coprine | NARS2    | 80.882 |
| SQ | Coprine | GLDC     | 80.882 |
| SQ | Coprine | GARS     | 80.882 |
| SQ | Coprine | VDAC1    | 80.882 |
| SQ | Coprine | SLC32A1  | 80.882 |
| SQ | Coprine | RNASE1   | 80.882 |
| SQ | Coprine | ACADSB   | 80.882 |
| SQ | Coprine | OTC      | 80.882 |
| SQ | Coprine | BCAT2    | 80.882 |
| SQ | Coprine | LYZ      | 80.882 |
| SQ | Coprine | CCBL1    | 55.444 |
| SQ | Coprine | ASL      | 55.444 |
| SQ | Coprine | SLC1A2   | 55.444 |
| SQ | Coprine | ICMT     | 55.444 |
| SQ | Coprine | TDO2     | 55.444 |
| SQ | Coprine | LGSN     | 55.444 |
| SQ | Coprine | FXN      | 55.444 |
| SQ | Coprine | CACNA1A  | 23     |

|    |         |         |        |
|----|---------|---------|--------|
| SQ | Coprine | DGKG    | 23     |
| SQ | Coprine | MTR     | 23     |
| SQ | Coprine | CACNA1B | 23     |
| SQ | Coprine | GRIN2B  | 23     |
| SQ | Coprine | SMPD3   | 23     |
| SQ | Coprine | GRIN2D  | 23     |
| SQ | Coprine | SCARB1  | 23     |
| SQ | Coprine | FBP1    | 22.373 |
| SQ | Coprine | CACNA1H | 22.373 |
| SQ | Coprine | ARV1    | 22.373 |
| SQ | Coprine | MUT     | 22.373 |
| SQ | Coprine | ADRB2   | 22.373 |
| SQ | Coprine | NRXN1   | 22.373 |
| SQ | Coprine | GART    | 22.373 |
| SQ | Coprine | AADAT   | 22.373 |
| SQ | Coprine | HTR2B   | 22.373 |
| SQ | Coprine | SLC22A6 | 22.373 |
| SQ | Coprine | AMDHD1  | 22.373 |
| SQ | Coprine | KCNA1   | 22.373 |
| SQ | Coprine | SLIT2   | 22.373 |
| SQ | Coprine | BAK1    | 22.373 |
| SQ | Coprine | TOMM40L | 22.373 |
| SQ | Coprine | ACAT1   | 22.373 |
| SQ | Coprine | SLC36A2 | 22.373 |
| SQ | Coprine | DAO     | 22.373 |
| SQ | Coprine | ACADS   | 22.373 |
| SQ | Coprine | TRPM1   | 22.373 |
| SQ | Coprine | SLC28A3 | 22.373 |
| SQ | Coprine | JUN     | 22.373 |
| SQ | Coprine | AKR1B1  | 22.373 |
| SQ | Coprine | HADHA   | 22.373 |
| SQ | Coprine | NIT2    | 22.373 |
| SQ | Coprine | ATIC    | 22.373 |
| SQ | Coprine | HIF1A   | 22.373 |
| SQ | Coprine | MTOR    | 22.373 |
| SQ | Coprine | DHFR    | 22.373 |
| SQ | Coprine | ATP13A2 | 22.373 |
| SQ | Coprine | MYO5A   | 22.373 |
| SQ | Coprine | EPRS    | 22.373 |
| SQ | Coprine | RAB8B   | 22.373 |
| SQ | Coprine | SOD2    | 22.373 |
| SQ | Coprine | LCN2    | 22.373 |
| SQ | Coprine | ADSL    | 22.373 |
| SQ | Coprine | PYCR1   | 22.373 |
| SQ | Coprine | NAGS    | 22.373 |
| SQ | Coprine | MYBPC3  | 22.373 |
| SQ | Coprine | FAH     | 22.373 |
| SQ | Coprine | ALDH4A1 | 22.373 |
| SQ | Coprine | DTYMK   | 22.373 |
| SQ | Coprine | SRR     | 22.373 |
| SQ | Coprine | BAAT    | 80.882 |

|    |         |         |        |
|----|---------|---------|--------|
| SQ | Coprine | SLC7A2  | 80.882 |
| SQ | Coprine | ASPA    | 80.882 |
| SQ | Coprine | GCAT    | 80.882 |
| SQ | Coprine | SLC1A4  | 80.882 |
| SQ | Coprine | GLRA3   | 80.882 |
| SQ | Coprine | GOT1    | 80.882 |
| SQ | Coprine | ASPH    | 80.882 |
| SQ | Coprine | GLYATL1 | 80.882 |
| SQ | Coprine | TNNC1   | 80.882 |
| SQ | Coprine | VDAC2   | 80.882 |
| SQ | Coprine | GPT     | 80.882 |
| SQ | Coprine | SLC6A9  | 80.882 |
| SQ | Coprine | OAZ1    | 80.882 |
| SQ | Coprine | ASS1    | 80.882 |
| SQ | Coprine | SLC6A5  | 80.882 |
| SQ | Coprine | GLUL    | 80.882 |
| SQ | Coprine | ACY1    | 80.882 |
| SQ | Coprine | LCMT2   | 80.882 |
| SQ | Coprine | PCCA    | 55.444 |
| SQ | Coprine | TLR4    | 55.444 |
| SQ | Coprine | TFAP2B  | 55.444 |
| SQ | Coprine | AMT     | 55.444 |
| SQ | Coprine | SLC38A7 | 55.444 |
| SQ | Coprine | ACOT8   | 55.444 |
| SQ | Coprine | TYMS    | 55.444 |
| SQ | Coprine | PADI3   | 23     |
| SQ | Coprine | METAP2  | 23     |
| SQ | Coprine | TAT     | 23     |
| SQ | Coprine | FARSA   | 23     |
| SQ | Coprine | PTDSS2  | 23     |
| SQ | Coprine | DDAH2   | 23     |
| SQ | Coprine | ADORA1  | 23     |
| SQ | Coprine | SMPD4   | 23     |
| SQ | Coprine | DGAT2   | 22.373 |
| SQ | Coprine | SLC6A1  | 22.373 |
| SQ | Coprine | ARPIN   | 22.373 |
| SQ | Coprine | OSBPL8  | 22.373 |
| SQ | Coprine | AVPR1A  | 22.373 |
| SQ | Coprine | HOGA1   | 22.373 |
| SQ | Coprine | PRLR    | 22.373 |
| SQ | Coprine | ZP4     | 22.373 |
| SQ | Coprine | SLC7A10 | 22.373 |
| SQ | Coprine | TOMM40  | 22.373 |
| SQ | Coprine | NTSR1   | 22.373 |
| SQ | Coprine | IL1B    | 22.373 |
| SQ | Coprine | THNSL1  | 22.373 |
| SQ | Coprine | SDSL    | 22.373 |
| SQ | Coprine | HMGCL   | 22.373 |
| SQ | Coprine | PQLC2   | 22.373 |
| SQ | Coprine | PLCG2   | 22.373 |
| SQ | Coprine | PHGDH   | 22.373 |



|    |         |          |        |
|----|---------|----------|--------|
| SQ | Coprine | TNNI3K   | 22.373 |
| SQ | Coprine | SLC28A1  | 22.373 |
| SQ | Coprine | PCMTD1   | 22.373 |
| SQ | Coprine | DPYS     | 22.373 |
| SQ | Coprine | AVP      | 22.373 |
| SQ | Coprine | DDO      | 22.373 |
| SQ | Coprine | DUT      | 22.373 |
| SQ | Coprine | HCRT     | 22.373 |
| SQ | Coprine | UROD     | 22.373 |
| SQ | Coprine | NFKBIE   | 22.373 |
| SQ | Coprine | AQP9     | 22.373 |
| SQ | Coprine | SLC7A7   | 22.373 |
| SQ | Coprine | HTT      | 22.373 |
| SQ | Coprine | UMPS     | 22.373 |
| SQ | Coprine | TARS2    | 22.373 |
| SQ | Coprine | ACADM    | 22.373 |
| SQ | Coprine | DPYSL2   | 22.373 |
| SQ | Coprine | STAT5B   | 22.373 |
| SQ | Coprine | ZP3      | 22.373 |
| SQ | Coprine | GAD2     | 22.373 |
| SQ | Coprine | KDM6B    | 22.373 |
| SQ | Coprine | SLC36A3  | 22.373 |
| SQ | Coprine | SDS      | 22.373 |
| SQ | Coprine | NARFL    | 22.373 |
| SQ | Coprine | ATP8A2   | 22.373 |
| SQ | Coprine | OAZ3     | 80.882 |
| SQ | Coprine | GCSH     | 80.882 |
| SQ | Coprine | IARS2    | 80.882 |
| SQ | Coprine | SLC38A3  | 80.882 |
| SQ | Coprine | ADSSL1   | 80.882 |
| SQ | Coprine | DARS2    | 80.882 |
| SQ | Coprine | GNMT     | 80.882 |
| SQ | Coprine | GPR18    | 80.882 |
| SQ | Coprine | GATM     | 80.882 |
| SQ | Coprine | DARS     | 80.882 |
| SQ | Coprine | OAZ2     | 80.882 |
| SQ | Coprine | AARS     | 80.882 |
| SQ | Coprine | SLC7A3   | 80.882 |
| SQ | Coprine | KARS     | 80.882 |
| SQ | Coprine | ADSS     | 80.882 |
| SQ | Coprine | SLC7A4   | 80.882 |
| SQ | Coprine | AGXT2    | 80.882 |
| SQ | Coprine | KYNU     | 80.882 |
| SQ | Coprine | PAICS    | 80.882 |
| SQ | Coprine | ASPG     | 55.444 |
| SQ | Coprine | ASNSD1   | 55.444 |
| SQ | Coprine | HCN3     | 55.444 |
| SQ | Coprine | TYW5     | 55.444 |
| SQ | Coprine | CTPS2    | 55.444 |
| SQ | Coprine | VARS2    | 55.444 |
| SQ | Coprine | CACNA2D1 | 23     |

|    |         |         |        |
|----|---------|---------|--------|
| SQ | Coprine | MTRR    | 23     |
| SQ | Coprine | PADI2   | 23     |
| SQ | Coprine | PLG     | 23     |
| SQ | Coprine | PRKCA   | 23     |
| SQ | Coprine | ATP8A1  | 23     |
| SQ | Coprine | PADI4   | 23     |
| SQ | Coprine | NOS1    | 23     |
| SQ | Coprine | GRIN1   | 23     |
| SQ | Coprine | ACAT2   | 22.373 |
| SQ | Coprine | TBPL1   | 22.373 |
| SQ | Coprine | RARS    | 22.373 |
| SQ | Coprine | CBS     | 22.373 |
| SQ | Coprine | IVD     | 22.373 |
| SQ | Coprine | GOT1L1  | 22.373 |
| SQ | Coprine | PFAS    | 22.373 |
| SQ | Coprine | SLC6A11 | 22.373 |
| SQ | Coprine | TK1     | 22.373 |
| SQ | Coprine | PAOX    | 22.373 |
| SQ | Coprine | RNASE4  | 22.373 |
| SQ | Coprine | RCAN3   | 22.373 |
| SQ | Coprine | CYP11A1 | 22.373 |
| SQ | Coprine | DHODH   | 22.373 |
| SQ | Coprine | MYLK2   | 22.373 |
| SQ | Coprine | MCCC1   | 22.373 |
| SQ | Coprine | TNNI3   | 22.373 |
| SQ | Coprine | MCCC2   | 22.373 |
| SQ | Coprine | TAF7    | 22.373 |
| SQ | Coprine | SLC19A2 | 22.373 |
| SQ | Coprine | STIM1   | 22.373 |
| SQ | Coprine | SLC25A5 | 22.373 |
| SQ | Coprine | GLYATL3 | 22.373 |
| SQ | Coprine | PRODH   | 22.373 |
| SQ | Coprine | SLC6A13 | 22.373 |
| SQ | Coprine | ANK3    | 22.373 |
| SQ | Coprine | PCMT1   | 22.373 |
| SQ | Coprine | EZR     | 22.373 |
| SQ | Coprine | STAR    | 22.373 |
| SQ | Coprine | CRACR2A | 22.373 |
| SQ | Coprine | UROS    | 22.373 |
| SQ | Coprine | GLRA4   | 22.373 |
| SQ | Coprine | SLC1A6  | 22.373 |
| SQ | Coprine | FH      | 22.373 |
| SQ | Coprine | PYCR2   | 22.373 |
| SQ | Coprine | AZIN1   | 22.373 |
| SQ | Coprine | SLC6A12 | 22.373 |
| SQ | Coprine | FAHD1   | 22.373 |
| SQ | Coprine | AASS    | 22.373 |
| SQ | Coprine | THNSL2  | 22.373 |
| SQ | Coprine | SLC19A3 | 22.373 |
| SQ | Coprine | TNNI2   | 22.373 |
| SQ | Coprine | SLC25A4 | 22.373 |

|    |                                                                 |         |        |
|----|-----------------------------------------------------------------|---------|--------|
| SQ | 1,1,5,5-Tetramethyl-4-Methano-2,3,4,6,7,10-Hexahydronaphthalene | KCND1   | 80.882 |
| SQ | 1,1,5,5-Tetramethyl-4-Methano-2,3,4,6,7,10-Hexahydronaphthalene | GAMT    | 80.882 |
| SQ | 1,1,5,5-Tetramethyl-4-Methano-2,3,4,6,7,10-Hexahydronaphthalene | CAT     | 80.882 |
| SQ | 1,1,5,5-Tetramethyl-4-Methano-2,3,4,6,7,10-Hexahydronaphthalene | KCNC1   | 80.882 |
| SQ | 1,1,5,5-Tetramethyl-4-Methano-2,3,4,6,7,10-Hexahydronaphthalene | KCND2   | 80.882 |
| SQ | 1,1,5,5-Tetramethyl-4-Methano-2,3,4,6,7,10-Hexahydronaphthalene | KCND3   | 80.882 |
| SQ | 1,1,5,5-Tetramethyl-4-Methano-2,3,4,6,7,10-Hexahydronaphthalene | KCNQ1   | 55.444 |
| SQ | 1,1,5,5-Tetramethyl-4-Methano-2,3,4,6,7,10-Hexahydronaphthalene | ADH7    | 22.373 |
| SQ | 1,1,5,5-Tetramethyl-4-Methano-2,3,4,6,7,10-Hexahydronaphthalene | AQP8    | 22.373 |
| SQ | 1,1,5,5-Tetramethyl-4-Methano-2,3,4,6,7,10-Hexahydronaphthalene | ASPA    | 22.373 |
| SQ | 1,1,5,5-Tetramethyl-4-Methano-2,3,4,6,7,10-Hexahydronaphthalene | APOE    | 22.373 |
| SQ | 1,1,5,5-Tetramethyl-4-Methano-2,3,4,6,7,10-Hexahydronaphthalene | MC4R    | 22.373 |
| SQ | 1,1,5,5-Tetramethyl-4-Methano-2,3,4,6,7,10-Hexahydronaphthalene | SCN5A   | 22.373 |
| SQ | 1,1,5,5-Tetramethyl-4-Methano-2,3,4,6,7,10-Hexahydronaphthalene | KCNIP2  | 22.373 |
| SQ | 1,1,5,5-Tetramethyl-4-Methano-2,3,4,6,7,10-Hexahydronaphthalene | SCGB1A1 | 22.373 |
| SQ | 1,1,5,5-Tetramethyl-4-Methano-2,3,4,6,7,10-Hexahydronaphthalene | CACNA1D | 22.373 |
| SQ | 1,1,5,5-Tetramethyl-4-Methano-2,3,4,6,7,10-Hexahydronaphthalene | PPARD   | 22.373 |
| SQ | 1,1,5,5-Tetramethyl-4-Methano-2,3,4,6,7,10-Hexahydronaphthalene | ALDH3B1 | 22.373 |
| SQ | 1,1,5,5-Tetramethyl-4-Methano-2,3,4,6,7,10-Hexahydronaphthalene | ALDH3B2 | 22.373 |
| SQ | 1,1,5,5-Tetramethyl-4-Methano-2,3,4,6,7,10-Hexahydronaphthalene | GJA5    | 22.373 |
| SQ | 1,1,5,5-Tetramethyl-4-Methano-2,3,4,6,7,10-Hexahydronaphthalene | KCNA3   | 80.882 |
| SQ | 1,1,5,5-Tetramethyl-4-Methano-2,3,4,6,7,10-Hexahydronaphthalene | KCNC3   | 80.882 |
| SQ | 1,1,5,5-Tetramethyl-4-Methano-2,3,4,6,7,10-Hexahydronaphthalene | KCNB1   | 80.882 |
| SQ | 1,1,5,5-Tetramethyl-4-Methano-2,3,4,6,7,10-Hexahydronaphthalene | ADH1C   | 80.882 |
| SQ | 1,1,5,5-Tetramethyl-4-Methano-2,3,4,6,7,10-Hexahydronaphthalene | ALDH2   | 80.882 |
| SQ | 1,1,5,5-Tetramethyl-4-Methano-2,3,4,6,7,10-Hexahydronaphthalene | GUCY1B3 | 55.444 |
| SQ | 1,1,5,5-Tetramethyl-4-Methano-2,3,4,6,7,10-Hexahydronaphthalene | ESR1    | 48     |
| SQ | 1,1,5,5-Tetramethyl-4-Methano-2,3,4,6,7,10-Hexahydronaphthalene | NFIB    | 22.373 |
| SQ | 1,1,5,5-Tetramethyl-4-Methano-2,3,4,6,7,10-Hexahydronaphthalene | ARX     | 22.373 |
| SQ | 1,1,5,5-Tetramethyl-4-Methano-2,3,4,6,7,10-Hexahydronaphthalene | NRXN1   | 22.373 |
| SQ | 1,1,5,5-Tetramethyl-4-Methano-2,3,4,6,7,10-Hexahydronaphthalene | SOX15   | 22.373 |
| SQ | 1,1,5,5-Tetramethyl-4-Methano-2,3,4,6,7,10-Hexahydronaphthalene | IL1B    | 22.373 |
| SQ | 1,1,5,5-Tetramethyl-4-Methano-2,3,4,6,7,10-Hexahydronaphthalene | SCN10A  | 22.373 |
| SQ | 1,1,5,5-Tetramethyl-4-Methano-2,3,4,6,7,10-Hexahydronaphthalene | GPX7    | 22.373 |
| SQ | 1,1,5,5-Tetramethyl-4-Methano-2,3,4,6,7,10-Hexahydronaphthalene | OXTR    | 22.373 |
| SQ | 1,1,5,5-Tetramethyl-4-Methano-2,3,4,6,7,10-Hexahydronaphthalene | RAPGEF2 | 22.373 |
| SQ | 1,1,5,5-Tetramethyl-4-Methano-2,3,4,6,7,10-Hexahydronaphthalene | NKX2-1  | 22.373 |
| SQ | 1,1,5,5-Tetramethyl-4-Methano-2,3,4,6,7,10-Hexahydronaphthalene | NPPA    | 22.373 |
| SQ | 1,1,5,5-Tetramethyl-4-Methano-2,3,4,6,7,10-Hexahydronaphthalene | RNASE2  | 22.373 |
| SQ | 1,1,5,5-Tetramethyl-4-Methano-2,3,4,6,7,10-Hexahydronaphthalene | FAS     | 22.373 |
| SQ | 1,1,5,5-Tetramethyl-4-Methano-2,3,4,6,7,10-Hexahydronaphthalene | PRKAB1  | 80.882 |
| SQ | 1,1,5,5-Tetramethyl-4-Methano-2,3,4,6,7,10-Hexahydronaphthalene | KCNA1   | 80.882 |
| SQ | 1,1,5,5-Tetramethyl-4-Methano-2,3,4,6,7,10-Hexahydronaphthalene | ADH1B   | 80.882 |
| SQ | 1,1,5,5-Tetramethyl-4-Methano-2,3,4,6,7,10-Hexahydronaphthalene | KCNB2   | 80.882 |
| SQ | 1,1,5,5-Tetramethyl-4-Methano-2,3,4,6,7,10-Hexahydronaphthalene | KCNA4   | 80.882 |
| SQ | 1,1,5,5-Tetramethyl-4-Methano-2,3,4,6,7,10-Hexahydronaphthalene | GATM    | 55.444 |
| SQ | 1,1,5,5-Tetramethyl-4-Methano-2,3,4,6,7,10-Hexahydronaphthalene | PGR     | 48     |
| SQ | 1,1,5,5-Tetramethyl-4-Methano-2,3,4,6,7,10-Hexahydronaphthalene | CYGB    | 22.373 |
| SQ | 1,1,5,5-Tetramethyl-4-Methano-2,3,4,6,7,10-Hexahydronaphthalene | IGF1    | 22.373 |
| SQ | 1,1,5,5-Tetramethyl-4-Methano-2,3,4,6,7,10-Hexahydronaphthalene | EDN1    | 22.373 |
| SQ | 1,1,5,5-Tetramethyl-4-Methano-2,3,4,6,7,10-Hexahydronaphthalene | CNTNAP4 | 22.373 |

|    |                                                                 |         |        |
|----|-----------------------------------------------------------------|---------|--------|
| SQ | 1,1,5,5-Tetramethyl-4-Methano-2,3,4,6,7,10-Hexahydronaphthalene | GRIN2A  | 22.373 |
| SQ | 1,1,5,5-Tetramethyl-4-Methano-2,3,4,6,7,10-Hexahydronaphthalene | SPARC   | 22.373 |
| SQ | 1,1,5,5-Tetramethyl-4-Methano-2,3,4,6,7,10-Hexahydronaphthalene | CRLF1   | 22.373 |
| SQ | 1,1,5,5-Tetramethyl-4-Methano-2,3,4,6,7,10-Hexahydronaphthalene | ALDH1B1 | 22.373 |
| SQ | 1,1,5,5-Tetramethyl-4-Methano-2,3,4,6,7,10-Hexahydronaphthalene | DARS    | 22.373 |
| SQ | 1,1,5,5-Tetramethyl-4-Methano-2,3,4,6,7,10-Hexahydronaphthalene | MIP     | 22.373 |
| SQ | 1,1,5,5-Tetramethyl-4-Methano-2,3,4,6,7,10-Hexahydronaphthalene | STX1A   | 22.373 |
| SQ | 1,1,5,5-Tetramethyl-4-Methano-2,3,4,6,7,10-Hexahydronaphthalene | NRXN2   | 22.373 |
| SQ | 1,1,5,5-Tetramethyl-4-Methano-2,3,4,6,7,10-Hexahydronaphthalene | DAB2IP  | 22.373 |
| SQ | 1,1,5,5-Tetramethyl-4-Methano-2,3,4,6,7,10-Hexahydronaphthalene | ADH1A   | 80.882 |
| SQ | 1,1,5,5-Tetramethyl-4-Methano-2,3,4,6,7,10-Hexahydronaphthalene | KCNA2   | 80.882 |
| SQ | 1,1,5,5-Tetramethyl-4-Methano-2,3,4,6,7,10-Hexahydronaphthalene | DLG4    | 80.882 |
| SQ | 1,1,5,5-Tetramethyl-4-Methano-2,3,4,6,7,10-Hexahydronaphthalene | KCNA5   | 80.882 |
| SQ | 1,1,5,5-Tetramethyl-4-Methano-2,3,4,6,7,10-Hexahydronaphthalene | KCNA7   | 80.882 |
| SQ | 1,1,5,5-Tetramethyl-4-Methano-2,3,4,6,7,10-Hexahydronaphthalene | KCNK4   | 55.444 |
| SQ | 1,1,5,5-Tetramethyl-4-Methano-2,3,4,6,7,10-Hexahydronaphthalene | FBP1    | 22.373 |
| SQ | 1,1,5,5-Tetramethyl-4-Methano-2,3,4,6,7,10-Hexahydronaphthalene | NRXN3   | 22.373 |
| SQ | 1,1,5,5-Tetramethyl-4-Methano-2,3,4,6,7,10-Hexahydronaphthalene | SHANK3  | 22.373 |
| SQ | 1,1,5,5-Tetramethyl-4-Methano-2,3,4,6,7,10-Hexahydronaphthalene | OXT     | 22.373 |
| SQ | 1,1,5,5-Tetramethyl-4-Methano-2,3,4,6,7,10-Hexahydronaphthalene | RNASE4  | 22.373 |
| SQ | 1,1,5,5-Tetramethyl-4-Methano-2,3,4,6,7,10-Hexahydronaphthalene | SLC17A7 | 22.373 |
| SQ | 1,1,5,5-Tetramethyl-4-Methano-2,3,4,6,7,10-Hexahydronaphthalene | SORCS3  | 22.373 |
| SQ | 1,1,5,5-Tetramethyl-4-Methano-2,3,4,6,7,10-Hexahydronaphthalene | FADD    | 22.373 |
| SQ | 1,1,5,5-Tetramethyl-4-Methano-2,3,4,6,7,10-Hexahydronaphthalene | LEP     | 22.373 |
| SQ | 1,1,5,5-Tetramethyl-4-Methano-2,3,4,6,7,10-Hexahydronaphthalene | ANK3    | 22.373 |
| SQ | 1,1,5,5-Tetramethyl-4-Methano-2,3,4,6,7,10-Hexahydronaphthalene | RYR3    | 22.373 |
| SQ | 1,1,5,5-Tetramethyl-4-Methano-2,3,4,6,7,10-Hexahydronaphthalene | PAXBPI  | 22.373 |
| SQ | 1,1,5,5-Tetramethyl-4-Methano-2,3,4,6,7,10-Hexahydronaphthalene | ADORA1  | 22.373 |
| SQ | 1,1,5,5-Tetramethyl-4-Methano-2,3,4,6,7,10-Hexahydronaphthalene | CYP2E1  | 22.373 |
| SQ | 1,1,5,5-Tetramethyl-4-Methano-2,3,4,6,7,10-Hexahydronaphthalene | KCNA10  | 80.882 |
| SQ | 1,1,5,5-Tetramethyl-4-Methano-2,3,4,6,7,10-Hexahydronaphthalene | TPO     | 80.882 |
| SQ | 1,1,5,5-Tetramethyl-4-Methano-2,3,4,6,7,10-Hexahydronaphthalene | KCNC2   | 80.882 |
| SQ | 1,1,5,5-Tetramethyl-4-Methano-2,3,4,6,7,10-Hexahydronaphthalene | RNASE1  | 80.882 |
| SQ | 1,1,5,5-Tetramethyl-4-Methano-2,3,4,6,7,10-Hexahydronaphthalene | KCNA6   | 80.882 |
| SQ | 1,1,5,5-Tetramethyl-4-Methano-2,3,4,6,7,10-Hexahydronaphthalene | IYD     | 55.444 |
| SQ | 1,1,5,5-Tetramethyl-4-Methano-2,3,4,6,7,10-Hexahydronaphthalene | DGKI    | 22.373 |
| SQ | 1,1,5,5-Tetramethyl-4-Methano-2,3,4,6,7,10-Hexahydronaphthalene | LRRC4B  | 22.373 |
| SQ | 1,1,5,5-Tetramethyl-4-Methano-2,3,4,6,7,10-Hexahydronaphthalene | ACY3    | 22.373 |
| SQ | 1,1,5,5-Tetramethyl-4-Methano-2,3,4,6,7,10-Hexahydronaphthalene | MAGI2   | 22.373 |
| SQ | 1,1,5,5-Tetramethyl-4-Methano-2,3,4,6,7,10-Hexahydronaphthalene | RAB3A   | 22.373 |
| SQ | 1,1,5,5-Tetramethyl-4-Methano-2,3,4,6,7,10-Hexahydronaphthalene | CYP11A1 | 22.373 |
| SQ | 1,1,5,5-Tetramethyl-4-Methano-2,3,4,6,7,10-Hexahydronaphthalene | RNASE8  | 22.373 |
| SQ | 1,1,5,5-Tetramethyl-4-Methano-2,3,4,6,7,10-Hexahydronaphthalene | SNTG2   | 22.373 |
| SQ | 1,1,5,5-Tetramethyl-4-Methano-2,3,4,6,7,10-Hexahydronaphthalene | NLGN1   | 22.373 |
| SQ | 1,1,5,5-Tetramethyl-4-Methano-2,3,4,6,7,10-Hexahydronaphthalene | KCNE5   | 22.373 |
| SQ | 1,1,5,5-Tetramethyl-4-Methano-2,3,4,6,7,10-Hexahydronaphthalene | ZPR1    | 22.373 |
| SQ | 1,1,5,5-Tetramethyl-4-Methano-2,3,4,6,7,10-Hexahydronaphthalene | PAX7    | 22.373 |
| SQ | 1,1,5,5-Tetramethyl-4-Methano-2,3,4,6,7,10-Hexahydronaphthalene | ADH4    | 22.373 |
| SQ | 1,1,5,5-Tetramethyl-4-Methano-2,3,4,6,7,10-Hexahydronaphthalene | ACY1    | 22.373 |
| SQ | Delta-Guaiene                                                   | KCND1   | 80.882 |
| SQ | Delta-Guaiene                                                   | GAMT    | 80.882 |

|    |               |         |        |
|----|---------------|---------|--------|
| SQ | Delta-Guaiene | CAT     | 80.882 |
| SQ | Delta-Guaiene | KCNC1   | 80.882 |
| SQ | Delta-Guaiene | KCND2   | 80.882 |
| SQ | Delta-Guaiene | KCND3   | 80.882 |
| SQ | Delta-Guaiene | KCNQ1   | 55.444 |
| SQ | Delta-Guaiene | CYGB    | 22.373 |
| SQ | Delta-Guaiene | IGF1    | 22.373 |
| SQ | Delta-Guaiene | EDN1    | 22.373 |
| SQ | Delta-Guaiene | CNTNAP4 | 22.373 |
| SQ | Delta-Guaiene | GRIN2A  | 22.373 |
| SQ | Delta-Guaiene | SPARC   | 22.373 |
| SQ | Delta-Guaiene | CRLF1   | 22.373 |
| SQ | Delta-Guaiene | ALDH1B1 | 22.373 |
| SQ | Delta-Guaiene | DARS    | 22.373 |
| SQ | Delta-Guaiene | MIP     | 22.373 |
| SQ | Delta-Guaiene | STX1A   | 22.373 |
| SQ | Delta-Guaiene | NRXN2   | 22.373 |
| SQ | Delta-Guaiene | DAB2IP  | 22.373 |
| SQ | Delta-Guaiene | KCNA3   | 80.882 |
| SQ | Delta-Guaiene | KCNC3   | 80.882 |
| SQ | Delta-Guaiene | KCNB1   | 80.882 |
| SQ | Delta-Guaiene | ADH1C   | 80.882 |
| SQ | Delta-Guaiene | ALDH2   | 80.882 |
| SQ | Delta-Guaiene | GUCY1B3 | 55.444 |
| SQ | Delta-Guaiene | FBP1    | 22.373 |
| SQ | Delta-Guaiene | NRXN3   | 22.373 |
| SQ | Delta-Guaiene | SHANK3  | 22.373 |
| SQ | Delta-Guaiene | OXT     | 22.373 |
| SQ | Delta-Guaiene | RNASE4  | 22.373 |
| SQ | Delta-Guaiene | SLC17A7 | 22.373 |
| SQ | Delta-Guaiene | SORCS3  | 22.373 |
| SQ | Delta-Guaiene | FADD    | 22.373 |
| SQ | Delta-Guaiene | LEP     | 22.373 |
| SQ | Delta-Guaiene | ANK3    | 22.373 |
| SQ | Delta-Guaiene | RYR3    | 22.373 |
| SQ | Delta-Guaiene | PAXBP1  | 22.373 |
| SQ | Delta-Guaiene | ADORA1  | 22.373 |
| SQ | Delta-Guaiene | CYP2E1  | 22.373 |
| SQ | Delta-Guaiene | PRKAB1  | 80.882 |
| SQ | Delta-Guaiene | KCNA1   | 80.882 |
| SQ | Delta-Guaiene | ADH1B   | 80.882 |
| SQ | Delta-Guaiene | KCNB2   | 80.882 |
| SQ | Delta-Guaiene | KCNA4   | 80.882 |
| SQ | Delta-Guaiene | GATM    | 55.444 |
| SQ | Delta-Guaiene | DGKI    | 22.373 |
| SQ | Delta-Guaiene | LRRC4B  | 22.373 |
| SQ | Delta-Guaiene | ACY3    | 22.373 |
| SQ | Delta-Guaiene | MAGI2   | 22.373 |
| SQ | Delta-Guaiene | RAB3A   | 22.373 |
| SQ | Delta-Guaiene | CYP11A1 | 22.373 |
| SQ | Delta-Guaiene | RNASE8  | 22.373 |

|    |                                 |         |        |
|----|---------------------------------|---------|--------|
| SQ | Delta-Guaiene                   | SNTG2   | 22.373 |
| SQ | Delta-Guaiene                   | NLGN1   | 22.373 |
| SQ | Delta-Guaiene                   | KCNE5   | 22.373 |
| SQ | Delta-Guaiene                   | ZPR1    | 22.373 |
| SQ | Delta-Guaiene                   | PAX7    | 22.373 |
| SQ | Delta-Guaiene                   | ADH4    | 22.373 |
| SQ | Delta-Guaiene                   | ACY1    | 22.373 |
| SQ | Delta-Guaiene                   | ADH1A   | 80.882 |
| SQ | Delta-Guaiene                   | KCNA2   | 80.882 |
| SQ | Delta-Guaiene                   | DLG4    | 80.882 |
| SQ | Delta-Guaiene                   | KCNA5   | 80.882 |
| SQ | Delta-Guaiene                   | KCNA7   | 80.882 |
| SQ | Delta-Guaiene                   | KCNK4   | 55.444 |
| SQ | Delta-Guaiene                   | ADH7    | 22.373 |
| SQ | Delta-Guaiene                   | AQP8    | 22.373 |
| SQ | Delta-Guaiene                   | ASPA    | 22.373 |
| SQ | Delta-Guaiene                   | APOE    | 22.373 |
| SQ | Delta-Guaiene                   | MC4R    | 22.373 |
| SQ | Delta-Guaiene                   | SCN5A   | 22.373 |
| SQ | Delta-Guaiene                   | KCNIP2  | 22.373 |
| SQ | Delta-Guaiene                   | SCGB1A1 | 22.373 |
| SQ | Delta-Guaiene                   | CACNA1D | 22.373 |
| SQ | Delta-Guaiene                   | PPARD   | 22.373 |
| SQ | Delta-Guaiene                   | ALDH3B1 | 22.373 |
| SQ | Delta-Guaiene                   | ALDH3B2 | 22.373 |
| SQ | Delta-Guaiene                   | GJA5    | 22.373 |
| SQ | Delta-Guaiene                   | KCNA10  | 80.882 |
| SQ | Delta-Guaiene                   | TPO     | 80.882 |
| SQ | Delta-Guaiene                   | KCNC2   | 80.882 |
| SQ | Delta-Guaiene                   | RNASE1  | 80.882 |
| SQ | Delta-Guaiene                   | KCNA6   | 80.882 |
| SQ | Delta-Guaiene                   | IYD     | 55.444 |
| SQ | Delta-Guaiene                   | NFIB    | 22.373 |
| SQ | Delta-Guaiene                   | ARX     | 22.373 |
| SQ | Delta-Guaiene                   | NRXN1   | 22.373 |
| SQ | Delta-Guaiene                   | SOX15   | 22.373 |
| SQ | Delta-Guaiene                   | IL1B    | 22.373 |
| SQ | Delta-Guaiene                   | SCN10A  | 22.373 |
| SQ | Delta-Guaiene                   | GPX7    | 22.373 |
| SQ | Delta-Guaiene                   | OXTR    | 22.373 |
| SQ | Delta-Guaiene                   | RAPGEF2 | 22.373 |
| SQ | Delta-Guaiene                   | NKX2-1  | 22.373 |
| SQ | Delta-Guaiene                   | NPPA    | 22.373 |
| SQ | Delta-Guaiene                   | RNASE2  | 22.373 |
| SQ | Delta-Guaiene                   | FAS     | 22.373 |
| SQ | 1-Methyl-4-Isoallyl-Cyclohexane | KCND1   | 80.882 |
| SQ | 1-Methyl-4-Isoallyl-Cyclohexane | GAMT    | 80.882 |
| SQ | 1-Methyl-4-Isoallyl-Cyclohexane | CAT     | 80.882 |
| SQ | 1-Methyl-4-Isoallyl-Cyclohexane | KCNC1   | 80.882 |
| SQ | 1-Methyl-4-Isoallyl-Cyclohexane | KCND2   | 80.882 |
| SQ | 1-Methyl-4-Isoallyl-Cyclohexane | KCND3   | 80.882 |

|    |                                 |         |        |
|----|---------------------------------|---------|--------|
| SQ | 1-Methyl-4-Isoallyl-Cyclohexane | KCNQ1   | 55.444 |
| SQ | 1-Methyl-4-Isoallyl-Cyclohexane | CYGB    | 22.373 |
| SQ | 1-Methyl-4-Isoallyl-Cyclohexane | IGF1    | 22.373 |
| SQ | 1-Methyl-4-Isoallyl-Cyclohexane | EDN1    | 22.373 |
| SQ | 1-Methyl-4-Isoallyl-Cyclohexane | CNTNAP4 | 22.373 |
| SQ | 1-Methyl-4-Isoallyl-Cyclohexane | GRIN2A  | 22.373 |
| SQ | 1-Methyl-4-Isoallyl-Cyclohexane | SPARC   | 22.373 |
| SQ | 1-Methyl-4-Isoallyl-Cyclohexane | CRLF1   | 22.373 |
| SQ | 1-Methyl-4-Isoallyl-Cyclohexane | ALDH1B1 | 22.373 |
| SQ | 1-Methyl-4-Isoallyl-Cyclohexane | DARS    | 22.373 |
| SQ | 1-Methyl-4-Isoallyl-Cyclohexane | MIP     | 22.373 |
| SQ | 1-Methyl-4-Isoallyl-Cyclohexane | STX1A   | 22.373 |
| SQ | 1-Methyl-4-Isoallyl-Cyclohexane | NRXN2   | 22.373 |
| SQ | 1-Methyl-4-Isoallyl-Cyclohexane | DAB2IP  | 22.373 |
| SQ | 1-Methyl-4-Isoallyl-Cyclohexane | KCNA3   | 80.882 |
| SQ | 1-Methyl-4-Isoallyl-Cyclohexane | KCNC3   | 80.882 |
| SQ | 1-Methyl-4-Isoallyl-Cyclohexane | KCNB1   | 80.882 |
| SQ | 1-Methyl-4-Isoallyl-Cyclohexane | ADH1C   | 80.882 |
| SQ | 1-Methyl-4-Isoallyl-Cyclohexane | ALDH2   | 80.882 |
| SQ | 1-Methyl-4-Isoallyl-Cyclohexane | GUCY1B3 | 55.444 |
| SQ | 1-Methyl-4-Isoallyl-Cyclohexane | FBP1    | 22.373 |
| SQ | 1-Methyl-4-Isoallyl-Cyclohexane | NRXN3   | 22.373 |
| SQ | 1-Methyl-4-Isoallyl-Cyclohexane | SHANK3  | 22.373 |
| SQ | 1-Methyl-4-Isoallyl-Cyclohexane | OXT     | 22.373 |
| SQ | 1-Methyl-4-Isoallyl-Cyclohexane | RNASE4  | 22.373 |
| SQ | 1-Methyl-4-Isoallyl-Cyclohexane | SLC17A7 | 22.373 |
| SQ | 1-Methyl-4-Isoallyl-Cyclohexane | SORCS3  | 22.373 |
| SQ | 1-Methyl-4-Isoallyl-Cyclohexane | FADD    | 22.373 |
| SQ | 1-Methyl-4-Isoallyl-Cyclohexane | LEP     | 22.373 |
| SQ | 1-Methyl-4-Isoallyl-Cyclohexane | ANK3    | 22.373 |
| SQ | 1-Methyl-4-Isoallyl-Cyclohexane | RYR3    | 22.373 |
| SQ | 1-Methyl-4-Isoallyl-Cyclohexane | PAXBP1  | 22.373 |
| SQ | 1-Methyl-4-Isoallyl-Cyclohexane | ADORA1  | 22.373 |
| SQ | 1-Methyl-4-Isoallyl-Cyclohexane | CYP2E1  | 22.373 |
| SQ | 1-Methyl-4-Isoallyl-Cyclohexane | PRKAB1  | 80.882 |
| SQ | 1-Methyl-4-Isoallyl-Cyclohexane | KCNA1   | 80.882 |
| SQ | 1-Methyl-4-Isoallyl-Cyclohexane | ADH1B   | 80.882 |
| SQ | 1-Methyl-4-Isoallyl-Cyclohexane | KCNB2   | 80.882 |
| SQ | 1-Methyl-4-Isoallyl-Cyclohexane | KCNA4   | 80.882 |
| SQ | 1-Methyl-4-Isoallyl-Cyclohexane | GATM    | 55.444 |
| SQ | 1-Methyl-4-Isoallyl-Cyclohexane | DGKI    | 22.373 |
| SQ | 1-Methyl-4-Isoallyl-Cyclohexane | LRRC4B  | 22.373 |
| SQ | 1-Methyl-4-Isoallyl-Cyclohexane | ACY3    | 22.373 |
| SQ | 1-Methyl-4-Isoallyl-Cyclohexane | MAGI2   | 22.373 |
| SQ | 1-Methyl-4-Isoallyl-Cyclohexane | RAB3A   | 22.373 |
| SQ | 1-Methyl-4-Isoallyl-Cyclohexane | CYP11A1 | 22.373 |
| SQ | 1-Methyl-4-Isoallyl-Cyclohexane | RNASE8  | 22.373 |
| SQ | 1-Methyl-4-Isoallyl-Cyclohexane | SNTG2   | 22.373 |
| SQ | 1-Methyl-4-Isoallyl-Cyclohexane | NLGN1   | 22.373 |
| SQ | 1-Methyl-4-Isoallyl-Cyclohexane | KCNE5   | 22.373 |
| SQ | 1-Methyl-4-Isoallyl-Cyclohexane | ZPR1    | 22.373 |

|    |                                 |         |         |
|----|---------------------------------|---------|---------|
| SQ | 1-Methyl-4-Isoallyl-Cyclohexane | PAX7    | 22.373  |
| SQ | 1-Methyl-4-Isoallyl-Cyclohexane | ADH4    | 22.373  |
| SQ | 1-Methyl-4-Isoallyl-Cyclohexane | ACY1    | 22.373  |
| SQ | 1-Methyl-4-Isoallyl-Cyclohexane | ADH1A   | 80.882  |
| SQ | 1-Methyl-4-Isoallyl-Cyclohexane | KCNA2   | 80.882  |
| SQ | 1-Methyl-4-Isoallyl-Cyclohexane | DLG4    | 80.882  |
| SQ | 1-Methyl-4-Isoallyl-Cyclohexane | KCNA5   | 80.882  |
| SQ | 1-Methyl-4-Isoallyl-Cyclohexane | KCNA7   | 80.882  |
| SQ | 1-Methyl-4-Isoallyl-Cyclohexane | KCNK4   | 55.444  |
| SQ | 1-Methyl-4-Isoallyl-Cyclohexane | ADH7    | 22.373  |
| SQ | 1-Methyl-4-Isoallyl-Cyclohexane | AQP8    | 22.373  |
| SQ | 1-Methyl-4-Isoallyl-Cyclohexane | ASPA    | 22.373  |
| SQ | 1-Methyl-4-Isoallyl-Cyclohexane | APOE    | 22.373  |
| SQ | 1-Methyl-4-Isoallyl-Cyclohexane | MC4R    | 22.373  |
| SQ | 1-Methyl-4-Isoallyl-Cyclohexane | SCN5A   | 22.373  |
| SQ | 1-Methyl-4-Isoallyl-Cyclohexane | KCNIP2  | 22.373  |
| SQ | 1-Methyl-4-Isoallyl-Cyclohexane | SCGB1A1 | 22.373  |
| SQ | 1-Methyl-4-Isoallyl-Cyclohexane | CACNA1D | 22.373  |
| SQ | 1-Methyl-4-Isoallyl-Cyclohexane | PPARD   | 22.373  |
| SQ | 1-Methyl-4-Isoallyl-Cyclohexane | ALDH3B1 | 22.373  |
| SQ | 1-Methyl-4-Isoallyl-Cyclohexane | ALDH3B2 | 22.373  |
| SQ | 1-Methyl-4-Isoallyl-Cyclohexane | GJA5    | 22.373  |
| SQ | 1-Methyl-4-Isoallyl-Cyclohexane | KCNA10  | 80.882  |
| SQ | 1-Methyl-4-Isoallyl-Cyclohexane | TPO     | 80.882  |
| SQ | 1-Methyl-4-Isoallyl-Cyclohexane | KCNC2   | 80.882  |
| SQ | 1-Methyl-4-Isoallyl-Cyclohexane | RNASE1  | 80.882  |
| SQ | 1-Methyl-4-Isoallyl-Cyclohexane | KCNA6   | 80.882  |
| SQ | 1-Methyl-4-Isoallyl-Cyclohexane | IYD     | 55.444  |
| SQ | 1-Methyl-4-Isoallyl-Cyclohexane | NFIB    | 22.373  |
| SQ | 1-Methyl-4-Isoallyl-Cyclohexane | ARX     | 22.373  |
| SQ | 1-Methyl-4-Isoallyl-Cyclohexane | NRXN1   | 22.373  |
| SQ | 1-Methyl-4-Isoallyl-Cyclohexane | SOX15   | 22.373  |
| SQ | 1-Methyl-4-Isoallyl-Cyclohexane | IL1B    | 22.373  |
| SQ | 1-Methyl-4-Isoallyl-Cyclohexane | SCN10A  | 22.373  |
| SQ | 1-Methyl-4-Isoallyl-Cyclohexane | GPX7    | 22.373  |
| SQ | 1-Methyl-4-Isoallyl-Cyclohexane | OXTR    | 22.373  |
| SQ | 1-Methyl-4-Isoallyl-Cyclohexane | RAPGEF2 | 22.373  |
| SQ | 1-Methyl-4-Isoallyl-Cyclohexane | NKX2-1  | 22.373  |
| SQ | 1-Methyl-4-Isoallyl-Cyclohexane | NPPA    | 22.373  |
| SQ | 1-Methyl-4-Isoallyl-Cyclohexane | RNASE2  | 22.373  |
| SQ | 1-Methyl-4-Isoallyl-Cyclohexane | FAS     | 22.373  |
| SQ | Gamma-Sitosterol                | ESR1    | 122.778 |
| SQ | Gamma-Sitosterol                | SNW1    | 55.444  |
| SQ | Gamma-Sitosterol                | CYP24A1 | 22.373  |
| SQ | Gamma-Sitosterol                | CYP3A4  | 22.373  |
| SQ | Gamma-Sitosterol                | WNT4    | 22.373  |
| SQ | Gamma-Sitosterol                | PML     | 22.373  |
| SQ | Gamma-Sitosterol                | IRX5    | 22.373  |
| SQ | Gamma-Sitosterol                | PGR     | 122.778 |
| SQ | Gamma-Sitosterol                | AR      | 48      |
| SQ | Gamma-Sitosterol                | GPBAR1  | 22.373  |



|    |                    |          |         |
|----|--------------------|----------|---------|
| SQ | Gamma-Sitosterol   | CALB1    | 22.373  |
| SQ | Gamma-Sitosterol   | TCF3     | 22.373  |
| SQ | Gamma-Sitosterol   | B4GALT1  | 22.373  |
| SQ | Gamma-Sitosterol   | RXRA     | 22.373  |
| SQ | Gamma-Sitosterol   | VDR      | 80.882  |
| SQ | Gamma-Sitosterol   | NR3C1    | 48      |
| SQ | Gamma-Sitosterol   | SNAI2    | 22.373  |
| SQ | Gamma-Sitosterol   | FGF23    | 22.373  |
| SQ | Gamma-Sitosterol   | BAX      | 22.373  |
| SQ | Gamma-Sitosterol   | S100G    | 22.373  |
| SQ | Gamma-Sitosterol   | NR1H4    | 22.373  |
| SQ | Gamma-Sitosterol   | CYP27B1  | 80.882  |
| SQ | Gamma-Sitosterol   | NFKB1    | 22.373  |
| SQ | Gamma-Sitosterol   | MED1     | 22.373  |
| SQ | Gamma-Sitosterol   | GF11     | 22.373  |
| SQ | Gamma-Sitosterol   | KL       | 22.373  |
| SQ | Gamma-Sitosterol   | CYP27A1  | 22.373  |
| SQ | Gamma-Sitosterol   | TRIM24   | 22.373  |
| SQ | Gamma-Sitosterol   | GC       | 55.444  |
| SQ | Gamma-Sitosterol   | AKR1C3   | 22.373  |
| SQ | Gamma-Sitosterol   | SNAI1    | 22.373  |
| SQ | Gamma-Sitosterol   | LANCL2   | 22.373  |
| SQ | Gamma-Sitosterol   | CYP2R1   | 22.373  |
| SQ | Gamma-Sitosterol   | KANK2    | 22.373  |
| SQ | Pentadecanoic Acid | AKR1D1   | 686     |
| SQ | Pentadecanoic Acid | ABAT     | 122.778 |
| SQ | Pentadecanoic Acid | COX5B    | 122.778 |
| SQ | Pentadecanoic Acid | SCN7A    | 122.778 |
| SQ | Pentadecanoic Acid | COX5A    | 122.778 |
| SQ | Pentadecanoic Acid | COX4I1   | 122.778 |
| SQ | Pentadecanoic Acid | SCN4A    | 122.778 |
| SQ | Pentadecanoic Acid | CES1     | 122.778 |
| SQ | Pentadecanoic Acid | COX2     | 122.778 |
| SQ | Pentadecanoic Acid | SUCLG2   | 80.882  |
| SQ | Pentadecanoic Acid | SLC25A10 | 80.882  |
| SQ | Pentadecanoic Acid | SUCNR1   | 80.882  |
| SQ | Pentadecanoic Acid | OXCT1    | 80.882  |
| SQ | Pentadecanoic Acid | SDHA     | 80.882  |
| SQ | Pentadecanoic Acid | DCT      | 55.444  |
| SQ | Pentadecanoic Acid | JMJD6    | 55.444  |
| SQ | Pentadecanoic Acid | HSD17B11 | 55.444  |
| SQ | Pentadecanoic Acid | P4HB     | 55.444  |
| SQ | Pentadecanoic Acid | GRIN3B   | 48      |
| SQ | Pentadecanoic Acid | CACNA1B  | 48      |
| SQ | Pentadecanoic Acid | GRIN3A   | 48      |
| SQ | Pentadecanoic Acid | GRIN1    | 48      |
| SQ | Pentadecanoic Acid | SIRT1    | 22.373  |
| SQ | Pentadecanoic Acid | SIX1     | 22.373  |
| SQ | Pentadecanoic Acid | OSBPL8   | 22.373  |
| SQ | Pentadecanoic Acid | UBE2B    | 22.373  |
| SQ | Pentadecanoic Acid | STIM2    | 22.373  |

|    |                    |          |         |
|----|--------------------|----------|---------|
| SQ | Pentadecanoic Acid | COLGALT1 | 22.373  |
| SQ | Pentadecanoic Acid | ARID1A   | 22.373  |
| SQ | Pentadecanoic Acid | ACOT4    | 22.373  |
| SQ | Pentadecanoic Acid | SLC25A12 | 22.373  |
| SQ | Pentadecanoic Acid | CDH11    | 22.373  |
| SQ | Pentadecanoic Acid | BDKRB2   | 22.373  |
| SQ | Pentadecanoic Acid | SMAD7    | 22.373  |
| SQ | Pentadecanoic Acid | WNT10B   | 22.373  |
| SQ | Pentadecanoic Acid | STAR     | 22.373  |
| SQ | Pentadecanoic Acid | CAMK2D   | 22.373  |
| SQ | Pentadecanoic Acid | HTT      | 22.373  |
| SQ | Pentadecanoic Acid | TST      | 22.373  |
| SQ | Pentadecanoic Acid | TMEM110  | 22.373  |
| SQ | Pentadecanoic Acid | EPHA4    | 22.373  |
| SQ | Pentadecanoic Acid | EDA      | 22.373  |
| SQ | Pentadecanoic Acid | KCNQ1    | 22.373  |
| SQ | Pentadecanoic Acid | UGT1A1   | 22.373  |
| SQ | Pentadecanoic Acid | PLOD2    | 22.373  |
| SQ | Pentadecanoic Acid | SLC25A1  | 22.373  |
| SQ | Pentadecanoic Acid | TYR      | 686     |
| SQ | Pentadecanoic Acid | SCN1A    | 122.778 |
| SQ | Pentadecanoic Acid | COX7C    | 122.778 |
| SQ | Pentadecanoic Acid | SCN5A    | 122.778 |
| SQ | Pentadecanoic Acid | COX3     | 122.778 |
| SQ | Pentadecanoic Acid | HDAC9    | 122.778 |
| SQ | Pentadecanoic Acid | SCN4B    | 122.778 |
| SQ | Pentadecanoic Acid | ACADSB   | 122.778 |
| SQ | Pentadecanoic Acid | OGDH     | 122.778 |
| SQ | Pentadecanoic Acid | SLC13A2  | 80.882  |
| SQ | Pentadecanoic Acid | P3H3     | 80.882  |
| SQ | Pentadecanoic Acid | SLC13A3  | 80.882  |
| SQ | Pentadecanoic Acid | PLOD3    | 80.882  |
| SQ | Pentadecanoic Acid | P4HA2    | 80.882  |
| SQ | Pentadecanoic Acid | AKR1C3   | 55.444  |
| SQ | Pentadecanoic Acid | SLC13A4  | 55.444  |
| SQ | Pentadecanoic Acid | TYRP1    | 55.444  |
| SQ | Pentadecanoic Acid | CACNA2D1 | 48      |
| SQ | Pentadecanoic Acid | CACNA2D2 | 48      |
| SQ | Pentadecanoic Acid | GRIN2C   | 48      |
| SQ | Pentadecanoic Acid | SLC7A1   | 48      |
| SQ | Pentadecanoic Acid | HDAC1    | 23      |
| SQ | Pentadecanoic Acid | SHMT1    | 22.373  |
| SQ | Pentadecanoic Acid | BDH1     | 22.373  |
| SQ | Pentadecanoic Acid | SPI1     | 22.373  |
| SQ | Pentadecanoic Acid | CYP1A2   | 22.373  |
| SQ | Pentadecanoic Acid | PKD2     | 22.373  |
| SQ | Pentadecanoic Acid | NEDD4    | 22.373  |
| SQ | Pentadecanoic Acid | EGLN2    | 22.373  |
| SQ | Pentadecanoic Acid | PHGDH    | 22.373  |
| SQ | Pentadecanoic Acid | YBX3     | 22.373  |
| SQ | Pentadecanoic Acid | CACNA1D  | 22.373  |

|    |                    |          |         |
|----|--------------------|----------|---------|
| SQ | Pentadecanoic Acid | PRPH     | 22.373  |
| SQ | Pentadecanoic Acid | PRDM8    | 22.373  |
| SQ | Pentadecanoic Acid | OGFOD1   | 22.373  |
| SQ | Pentadecanoic Acid | DLST     | 22.373  |
| SQ | Pentadecanoic Acid | AP3D1    | 22.373  |
| SQ | Pentadecanoic Acid | IL10     | 22.373  |
| SQ | Pentadecanoic Acid | SLC1A6   | 22.373  |
| SQ | Pentadecanoic Acid | CDC42    | 22.373  |
| SQ | Pentadecanoic Acid | OCA2     | 22.373  |
| SQ | Pentadecanoic Acid | HACL1    | 22.373  |
| SQ | Pentadecanoic Acid | CASQ2    | 22.373  |
| SQ | Pentadecanoic Acid | DLD      | 22.373  |
| SQ | Pentadecanoic Acid | CYP1A1   | 22.373  |
| SQ | Pentadecanoic Acid | SRD5A2   | 686     |
| SQ | Pentadecanoic Acid | ESRRG    | 122.778 |
| SQ | Pentadecanoic Acid | COX1     | 122.778 |
| SQ | Pentadecanoic Acid | SCN10A   | 122.778 |
| SQ | Pentadecanoic Acid | AR       | 122.778 |
| SQ | Pentadecanoic Acid | PLA2G1B  | 122.778 |
| SQ | Pentadecanoic Acid | ADH1C    | 122.778 |
| SQ | Pentadecanoic Acid | SCN8A    | 122.778 |
| SQ | Pentadecanoic Acid | HDAC2    | 122.778 |
| SQ | Pentadecanoic Acid | SLC13A1  | 80.882  |
| SQ | Pentadecanoic Acid | OXCT2    | 80.882  |
| SQ | Pentadecanoic Acid | ASPH     | 80.882  |
| SQ | Pentadecanoic Acid | P4HA1    | 80.882  |
| SQ | Pentadecanoic Acid | SUCLA2   | 80.882  |
| SQ | Pentadecanoic Acid | CRTAP    | 55.444  |
| SQ | Pentadecanoic Acid | SDHAF2   | 55.444  |
| SQ | Pentadecanoic Acid | HIF1AN   | 55.444  |
| SQ | Pentadecanoic Acid | PLAT     | 48      |
| SQ | Pentadecanoic Acid | GRIN2A   | 48      |
| SQ | Pentadecanoic Acid | GRIN2B   | 48      |
| SQ | Pentadecanoic Acid | SLC7A4   | 48      |
| SQ | Pentadecanoic Acid | GPD1L    | 22.373  |
| SQ | Pentadecanoic Acid | SUGCT    | 22.373  |
| SQ | Pentadecanoic Acid | COLGALT2 | 22.373  |
| SQ | Pentadecanoic Acid | SUOX     | 22.373  |
| SQ | Pentadecanoic Acid | CCL5     | 22.373  |
| SQ | Pentadecanoic Acid | ALDH9A1  | 22.373  |
| SQ | Pentadecanoic Acid | CYP11A1  | 22.373  |
| SQ | Pentadecanoic Acid | ACAT1    | 22.373  |
| SQ | Pentadecanoic Acid | PNLIPRP2 | 22.373  |
| SQ | Pentadecanoic Acid | 8-Mar    | 22.373  |
| SQ | Pentadecanoic Acid | DDC      | 22.373  |
| SQ | Pentadecanoic Acid | BCKDHB   | 22.373  |
| SQ | Pentadecanoic Acid | UROD     | 22.373  |
| SQ | Pentadecanoic Acid | SLC38A7  | 22.373  |
| SQ | Pentadecanoic Acid | PF4      | 22.373  |
| SQ | Pentadecanoic Acid | MYO5A    | 22.373  |
| SQ | Pentadecanoic Acid | EGLN3    | 22.373  |

|    |                    |          |         |
|----|--------------------|----------|---------|
| SQ | Pentadecanoic Acid | NPPA     | 22.373  |
| SQ | Pentadecanoic Acid | ARHGEF2  | 22.373  |
| SQ | Pentadecanoic Acid | HSD17B8  | 22.373  |
| SQ | Pentadecanoic Acid | RYR2     | 22.373  |
| SQ | Pentadecanoic Acid | GJA5     | 22.373  |
| SQ | Pentadecanoic Acid | GNAS     | 22.373  |
| SQ | Pentadecanoic Acid | SULT2A1  | 22.373  |
| SQ | Pentadecanoic Acid | SCN11A   | 122.778 |
| SQ | Pentadecanoic Acid | SCN3B    | 122.778 |
| SQ | Pentadecanoic Acid | SCN3A    | 122.778 |
| SQ | Pentadecanoic Acid | ALDH5A1  | 122.778 |
| SQ | Pentadecanoic Acid | COX7A1   | 122.778 |
| SQ | Pentadecanoic Acid | COX6A2   | 122.778 |
| SQ | Pentadecanoic Acid | COX6B1   | 122.778 |
| SQ | Pentadecanoic Acid | COX7B    | 122.778 |
| SQ | Pentadecanoic Acid | COX8A    | 122.778 |
| SQ | Pentadecanoic Acid | SUCLG1   | 80.882  |
| SQ | Pentadecanoic Acid | TMLHE    | 80.882  |
| SQ | Pentadecanoic Acid | BBOX1    | 80.882  |
| SQ | Pentadecanoic Acid | SDHC     | 80.882  |
| SQ | Pentadecanoic Acid | SDHD     | 80.882  |
| SQ | Pentadecanoic Acid | SLIT2    | 55.444  |
| SQ | Pentadecanoic Acid | SLC1A3   | 55.444  |
| SQ | Pentadecanoic Acid | UROS     | 55.444  |
| SQ | Pentadecanoic Acid | SLC7A2   | 48      |
| SQ | Pentadecanoic Acid | TOP1     | 48      |
| SQ | Pentadecanoic Acid | SLC7A3   | 48      |
| SQ | Pentadecanoic Acid | GRIN2D   | 48      |
| SQ | Pentadecanoic Acid | SRD5A1   | 22.373  |
| SQ | Pentadecanoic Acid | ACSS2    | 22.373  |
| SQ | Pentadecanoic Acid | SIX4     | 22.373  |
| SQ | Pentadecanoic Acid | CCL2     | 22.373  |
| SQ | Pentadecanoic Acid | ANK2     | 22.373  |
| SQ | Pentadecanoic Acid | TH       | 22.373  |
| SQ | Pentadecanoic Acid | DHODH    | 22.373  |
| SQ | Pentadecanoic Acid | GALC     | 22.373  |
| SQ | Pentadecanoic Acid | CYP39A1  | 22.373  |
| SQ | Pentadecanoic Acid | STIM1    | 22.373  |
| SQ | Pentadecanoic Acid | DHTKD1   | 22.373  |
| SQ | Pentadecanoic Acid | KCNE5    | 22.373  |
| SQ | Pentadecanoic Acid | UGT8     | 22.373  |
| SQ | Pentadecanoic Acid | ACSS1    | 22.373  |
| SQ | Pentadecanoic Acid | CRACR2A  | 22.373  |
| SQ | Pentadecanoic Acid | ILVBL    | 22.373  |
| SQ | Pentadecanoic Acid | OGDHL    | 22.373  |
| SQ | Pentadecanoic Acid | ACADM    | 22.373  |
| SQ | Pentadecanoic Acid | EGLN1    | 22.373  |
| SQ | Pentadecanoic Acid | CTNNB1   | 22.373  |
| SQ | Pentadecanoic Acid | HAP1     | 22.373  |
| SQ | Pentadecanoic Acid | DHRS9    | 22.373  |
| SQ | Pentadecanoic Acid | SLC25A13 | 22.373  |

|    |                    |         |         |
|----|--------------------|---------|---------|
| SQ | Pentadecanoic Acid | NFX1    | 22.373  |
| SQ | Pentadecanoic Acid | SCN2B   | 122.778 |
| SQ | Pentadecanoic Acid | COX6C   | 122.778 |
| SQ | Pentadecanoic Acid | AKR1C2  | 122.778 |
| SQ | Pentadecanoic Acid | SCN2A   | 122.778 |
| SQ | Pentadecanoic Acid | FECH    | 122.778 |
| SQ | Pentadecanoic Acid | SCN9A   | 122.778 |
| SQ | Pentadecanoic Acid | FABP6   | 122.778 |
| SQ | Pentadecanoic Acid | SCN1B   | 122.778 |
| SQ | Pentadecanoic Acid | NR1H4   | 122.778 |
| SQ | Pentadecanoic Acid | HSD17B6 | 80.882  |
| SQ | Pentadecanoic Acid | PLOD1   | 80.882  |
| SQ | Pentadecanoic Acid | SDHB    | 80.882  |
| SQ | Pentadecanoic Acid | P3H2    | 80.882  |
| SQ | Pentadecanoic Acid | P3H1    | 80.882  |
| SQ | Pentadecanoic Acid | ACO2    | 55.444  |
| SQ | Pentadecanoic Acid | SALL1   | 55.444  |
| SQ | Pentadecanoic Acid | SLC13A5 | 55.444  |
| SQ | Pentadecanoic Acid | CACNA1A | 48      |
| SQ | Pentadecanoic Acid | PLG     | 48      |
| SQ | Pentadecanoic Acid | KARS    | 48      |
| SQ | Pentadecanoic Acid | ADORA1  | 48      |
| SQ | Pentadecanoic Acid | FBXO45  | 22.373  |
| SQ | Pentadecanoic Acid | ARV1    | 22.373  |
| SQ | Pentadecanoic Acid | MRPS36  | 22.373  |
| SQ | Pentadecanoic Acid | BCKDK   | 22.373  |
| SQ | Pentadecanoic Acid | HSD17B2 | 22.373  |
| SQ | Pentadecanoic Acid | EPO     | 22.373  |
| SQ | Pentadecanoic Acid | CLN3    | 22.373  |
| SQ | Pentadecanoic Acid | PLCG2   | 22.373  |
| SQ | Pentadecanoic Acid | BCKDHA  | 22.373  |
| SQ | Pentadecanoic Acid | GAL3ST1 | 22.373  |
| SQ | Pentadecanoic Acid | NEDD4L  | 22.373  |
| SQ | Pentadecanoic Acid | SRD5A3  | 22.373  |
| SQ | Pentadecanoic Acid | ETHE1   | 22.373  |
| SQ | Pentadecanoic Acid | CYP4B1  | 22.373  |
| SQ | Pentadecanoic Acid | HSD17B1 | 22.373  |
| SQ | Pentadecanoic Acid | CAV3    | 22.373  |
| SQ | Pentadecanoic Acid | KCNA5   | 22.373  |
| SQ | Pentadecanoic Acid | SQRDL   | 22.373  |
| SQ | Pentadecanoic Acid | ETFDH   | 22.373  |
| SQ | Pentadecanoic Acid | P4HA3   | 22.373  |
| SQ | Pentadecanoic Acid | PCSK9   | 22.373  |
| SQ | Pentadecanoic Acid | GPR143  | 22.373  |
| SQ | Pentadecanoic Acid | SFXN5   | 22.373  |
| SQ | Pentadecanoic Acid | DBT     | 22.373  |
| SQ | Ginsenoside-Rb2    | ATP1A1  | 48      |
| SQ | Cuparene           | GABRB2  | 80.882  |
| SQ | Cuparene           | ALOX5   | 48      |
| SQ | Cuparene           | GABRB3  | 80.882  |
| SQ | Cuparene           | CD36    | 22.373  |

|    |                    |         |        |
|----|--------------------|---------|--------|
| SQ | Cuparene           | F2      | 80.882 |
| SQ | Cuparene           | SDC4    | 22.373 |
| SQ | Cuparene           | GPR27   | 55.444 |
| SQ | Cuparene           | CD47    | 22.373 |
| SQ | Cuparene           | S1PR5   | 48     |
| SQ | Cuparene           | BICD1   | 22.373 |
| SQ | Ginsenoside-Rd     | ATP1A1  | 48     |
| DG | Dimethyl Phthalate | SCN10A  | 80.882 |
| DG | Dimethyl Phthalate | GABRB1  | 36.688 |
| DG | Dimethyl Phthalate | ALDH2   | 36.688 |
| DG | Dimethyl Phthalate | SIX3    | 22.373 |
| DG | Dimethyl Phthalate | SLC44A4 | 22.373 |
| DG | Dimethyl Phthalate | ENPP6   | 22.373 |
| DG | Dimethyl Phthalate | CHKA    | 22.373 |
| DG | Dimethyl Phthalate | ACHE    | 80.882 |
| DG | Dimethyl Phthalate | GLRA2   | 36.688 |
| DG | Dimethyl Phthalate | GLRA1   | 36.688 |
| DG | Dimethyl Phthalate | ANK2    | 22.373 |
| DG | Dimethyl Phthalate | ALDH7A1 | 22.373 |
| DG | Dimethyl Phthalate | CDH8    | 22.373 |
| DG | Dimethyl Phthalate | RYR2    | 22.373 |
| DG | Dimethyl Phthalate | BCHE    | 80.882 |
| DG | Dimethyl Phthalate | GLRA3   | 36.688 |
| DG | Dimethyl Phthalate | SLC5A7  | 22.373 |
| DG | Dimethyl Phthalate | CRP     | 22.373 |
| DG | Dimethyl Phthalate | DNM3    | 22.373 |
| DG | Dimethyl Phthalate | KCNA5   | 22.373 |
| DG | Dimethyl Phthalate | CHDH    | 22.373 |
| DG | Dimethyl Phthalate | COLQ    | 55.444 |
| DG | Dimethyl Phthalate | GLRB    | 36.688 |
| DG | Dimethyl Phthalate | NRG1    | 22.373 |
| DG | Dimethyl Phthalate | SCN5A   | 22.373 |
| DG | Dimethyl Phthalate | SCN4B   | 22.373 |
| DG | Dimethyl Phthalate | FNTA    | 22.373 |
| DG | Dimethyl Phthalate | GJA5    | 22.373 |
| DG | Dimethyl Phthalate | SCN1A   | 36.688 |
| DG | Dimethyl Phthalate | DBH     | 36.688 |
| DG | Dimethyl Phthalate | DMGDH   | 22.373 |
| DG | Dimethyl Phthalate | PRSS12  | 22.373 |
| DG | Dimethyl Phthalate | ASCL1   | 22.373 |
| DG | Dimethyl Phthalate | AGRN    | 22.373 |
| DG | Dimethyl Phthalate | GRIN1   | 22.373 |
| DG | Beta-Myrcene       | KCND1   | 80.882 |
| DG | Beta-Myrcene       | GAMT    | 80.882 |
| DG | Beta-Myrcene       | CAT     | 80.882 |
| DG | Beta-Myrcene       | KCNC1   | 80.882 |
| DG | Beta-Myrcene       | KCND2   | 80.882 |
| DG | Beta-Myrcene       | KCND3   | 80.882 |
| DG | Beta-Myrcene       | KCNQ1   | 55.444 |
| DG | Beta-Myrcene       | CYGB    | 22.373 |
| DG | Beta-Myrcene       | IGF1    | 22.373 |

|    |              |         |        |
|----|--------------|---------|--------|
| DG | Beta-Myrcene | EDN1    | 22.373 |
| DG | Beta-Myrcene | CNTNAP4 | 22.373 |
| DG | Beta-Myrcene | GRIN2A  | 22.373 |
| DG | Beta-Myrcene | SPARC   | 22.373 |
| DG | Beta-Myrcene | CRLF1   | 22.373 |
| DG | Beta-Myrcene | ALDH1B1 | 22.373 |
| DG | Beta-Myrcene | DARS    | 22.373 |
| DG | Beta-Myrcene | MIP     | 22.373 |
| DG | Beta-Myrcene | STX1A   | 22.373 |
| DG | Beta-Myrcene | NRXN2   | 22.373 |
| DG | Beta-Myrcene | DAB2IP  | 22.373 |
| DG | Beta-Myrcene | KCNA3   | 80.882 |
| DG | Beta-Myrcene | KCNC3   | 80.882 |
| DG | Beta-Myrcene | KCNB1   | 80.882 |
| DG | Beta-Myrcene | ADH1C   | 80.882 |
| DG | Beta-Myrcene | ALDH2   | 80.882 |
| DG | Beta-Myrcene | GUCY1B3 | 55.444 |
| DG | Beta-Myrcene | FBP1    | 22.373 |
| DG | Beta-Myrcene | NRXN3   | 22.373 |
| DG | Beta-Myrcene | SHANK3  | 22.373 |
| DG | Beta-Myrcene | OXT     | 22.373 |
| DG | Beta-Myrcene | RNASE4  | 22.373 |
| DG | Beta-Myrcene | SLC17A7 | 22.373 |
| DG | Beta-Myrcene | SORCS3  | 22.373 |
| DG | Beta-Myrcene | FADD    | 22.373 |
| DG | Beta-Myrcene | LEP     | 22.373 |
| DG | Beta-Myrcene | ANK3    | 22.373 |
| DG | Beta-Myrcene | RYR3    | 22.373 |
| DG | Beta-Myrcene | PAXBP1  | 22.373 |
| DG | Beta-Myrcene | ADORA1  | 22.373 |
| DG | Beta-Myrcene | CYP2E1  | 22.373 |
| DG | Beta-Myrcene | PRKAB1  | 80.882 |
| DG | Beta-Myrcene | KCNA1   | 80.882 |
| DG | Beta-Myrcene | ADH1B   | 80.882 |
| DG | Beta-Myrcene | KCNB2   | 80.882 |
| DG | Beta-Myrcene | KCNA4   | 80.882 |
| DG | Beta-Myrcene | GATM    | 55.444 |
| DG | Beta-Myrcene | DGKI    | 22.373 |
| DG | Beta-Myrcene | LRRC4B  | 22.373 |
| DG | Beta-Myrcene | ACY3    | 22.373 |
| DG | Beta-Myrcene | MAGI2   | 22.373 |
| DG | Beta-Myrcene | RAB3A   | 22.373 |
| DG | Beta-Myrcene | CYP11A1 | 22.373 |
| DG | Beta-Myrcene | RNASE8  | 22.373 |
| DG | Beta-Myrcene | SNTG2   | 22.373 |
| DG | Beta-Myrcene | NLGN1   | 22.373 |
| DG | Beta-Myrcene | KCNE5   | 22.373 |
| DG | Beta-Myrcene | ZPR1    | 22.373 |
| DG | Beta-Myrcene | PAX7    | 22.373 |
| DG | Beta-Myrcene | ADH4    | 22.373 |
| DG | Beta-Myrcene | ACY1    | 22.373 |

|    |              |          |        |
|----|--------------|----------|--------|
| DG | Beta-Myrcene | ADH1A    | 80.882 |
| DG | Beta-Myrcene | KCNA2    | 80.882 |
| DG | Beta-Myrcene | DLG4     | 80.882 |
| DG | Beta-Myrcene | KCNA5    | 80.882 |
| DG | Beta-Myrcene | KCNA7    | 80.882 |
| DG | Beta-Myrcene | KCNK4    | 55.444 |
| DG | Beta-Myrcene | ADH7     | 22.373 |
| DG | Beta-Myrcene | AQP8     | 22.373 |
| DG | Beta-Myrcene | ASPA     | 22.373 |
| DG | Beta-Myrcene | APOE     | 22.373 |
| DG | Beta-Myrcene | MC4R     | 22.373 |
| DG | Beta-Myrcene | SCN5A    | 22.373 |
| DG | Beta-Myrcene | KCNIP2   | 22.373 |
| DG | Beta-Myrcene | SCGB1A1  | 22.373 |
| DG | Beta-Myrcene | CACNA1D  | 22.373 |
| DG | Beta-Myrcene | PPARD    | 22.373 |
| DG | Beta-Myrcene | ALDH3B1  | 22.373 |
| DG | Beta-Myrcene | ALDH3B2  | 22.373 |
| DG | Beta-Myrcene | GJA5     | 22.373 |
| DG | Beta-Myrcene | KCNA10   | 80.882 |
| DG | Beta-Myrcene | TPO      | 80.882 |
| DG | Beta-Myrcene | KCNC2    | 80.882 |
| DG | Beta-Myrcene | RNASE1   | 80.882 |
| DG | Beta-Myrcene | KCNA6    | 80.882 |
| DG | Beta-Myrcene | IYD      | 55.444 |
| DG | Beta-Myrcene | NFIB     | 22.373 |
| DG | Beta-Myrcene | ARX      | 22.373 |
| DG | Beta-Myrcene | NRXN1    | 22.373 |
| DG | Beta-Myrcene | SOX15    | 22.373 |
| DG | Beta-Myrcene | IL1B     | 22.373 |
| DG | Beta-Myrcene | SCN10A   | 22.373 |
| DG | Beta-Myrcene | GPX7     | 22.373 |
| DG | Beta-Myrcene | OXTR     | 22.373 |
| DG | Beta-Myrcene | RAPGEF2  | 22.373 |
| DG | Beta-Myrcene | NKX2-1   | 22.373 |
| DG | Beta-Myrcene | NPPA     | 22.373 |
| DG | Beta-Myrcene | RNASE2   | 22.373 |
| DG | Beta-Myrcene | FAS      | 22.373 |
| DG | Ethanol      | CACNB1   | 686    |
| DG | Ethanol      | CHRNA4   | 686    |
| DG | Ethanol      | KCNJ3    | 686    |
| DG | Ethanol      | GABRE    | 686    |
| DG | Ethanol      | GABRP    | 686    |
| DG | Ethanol      | GABRB2   | 686    |
| DG | Ethanol      | GABRQ    | 686    |
| DG | Ethanol      | GRIN3A   | 686    |
| DG | Ethanol      | HTR3E    | 686    |
| DG | Ethanol      | CHRFAM7A | 686    |
| DG | Ethanol      | GLRA1    | 686    |
| DG | Ethanol      | FOXL2    | 55.444 |
| DG | Ethanol      | CACNA1H  | 22.373 |



|    |         |         |        |
|----|---------|---------|--------|
| DG | Ethanol | HTR2A   | 22.373 |
| DG | Ethanol | ZP4     | 22.373 |
| DG | Ethanol | MAOB    | 22.373 |
| DG | Ethanol | NPY5R   | 22.373 |
| DG | Ethanol | DRD2    | 22.373 |
| DG | Ethanol | UTS2R   | 22.373 |
| DG | Ethanol | KCNE5   | 22.373 |
| DG | Ethanol | CRH     | 22.373 |
| DG | Ethanol | NCOA1   | 22.373 |
| DG | Ethanol | ROCK1   | 22.373 |
| DG | Ethanol | KMT2A   | 22.373 |
| DG | Ethanol | DRD1    | 22.373 |
| DG | Ethanol | KCNQ1   | 22.373 |
| DG | Ethanol | GRM7    | 22.373 |
| DG | Ethanol | GRIA4   | 686    |
| DG | Ethanol | CHRN3   | 686    |
| DG | Ethanol | GABRG3  | 686    |
| DG | Ethanol | GABRA3  | 686    |
| DG | Ethanol | CHRNA10 | 686    |
| DG | Ethanol | CACNA1C | 686    |
| DG | Ethanol | CHRNA2  | 686    |
| DG | Ethanol | HTR3B   | 686    |
| DG | Ethanol | GABRA6  | 686    |
| DG | Ethanol | CHRNA5  | 686    |
| DG | Ethanol | CACNG1  | 686    |
| DG | Ethanol | DMTN    | 55.444 |
| DG | Ethanol | SLITRK6 | 22.373 |
| DG | Ethanol | AVPR1A  | 22.373 |
| DG | Ethanol | SUMO1   | 22.373 |
| DG | Ethanol | GLRB    | 22.373 |
| DG | Ethanol | MSN     | 22.373 |
| DG | Ethanol | AVP     | 22.373 |
| DG | Ethanol | ADIRF   | 22.373 |
| DG | Ethanol | CNR1    | 22.373 |
| DG | Ethanol | GLI3    | 22.373 |
| DG | Ethanol | AOC2    | 22.373 |
| DG | Ethanol | KCNA5   | 22.373 |
| DG | Ethanol | TNR     | 22.373 |
| DG | Ethanol | EEA1    | 22.373 |
| DG | Ethanol | ICAM1   | 22.373 |
| DG | Ethanol | FOS     | 22.373 |
| DG | Ethanol | GABRA2  | 686    |
| DG | Ethanol | GABRB1  | 686    |
| DG | Ethanol | VCAM1   | 686    |
| DG | Ethanol | SLC29A1 | 686    |
| DG | Ethanol | GRIA2   | 686    |
| DG | Ethanol | CHRN2   | 686    |
| DG | Ethanol | CHRNA6  | 686    |
| DG | Ethanol | GRIA3   | 686    |
| DG | Ethanol | HTR3A   | 686    |
| DG | Ethanol | CHRN4   | 686    |

|    |         |         |        |
|----|---------|---------|--------|
| DG | Ethanol | ADAM8   | 55.444 |
| DG | Ethanol | KCNMA1  | 55.444 |
| DG | Ethanol | UTS2    | 22.373 |
| DG | Ethanol | ADORA2A | 22.373 |
| DG | Ethanol | CNR2    | 22.373 |
| DG | Ethanol | P2RX3   | 22.373 |
| DG | Ethanol | GHRL    | 22.373 |
| DG | Ethanol | PAX2    | 22.373 |
| DG | Ethanol | GHRH    | 22.373 |
| DG | Ethanol | SLC18A3 | 22.373 |
| DG | Ethanol | CAV3    | 22.373 |
| DG | Ethanol | IL6     | 22.373 |
| DG | Ethanol | TACR2   | 22.373 |
| DG | Ethanol | ZP3     | 22.373 |
| DG | Ethanol | POU4F3  | 22.373 |
| DG | Ethanol | CARTPT  | 22.373 |
| DG | Ethanol | GRIN1   | 22.373 |
| DG | Ethanol | CACNG2  | 686    |
| DG | Ethanol | GRIA1   | 686    |
| DG | Ethanol | CHRNA7  | 686    |
| DG | Ethanol | CACNA1S | 686    |
| DG | Ethanol | GABRA4  | 686    |
| DG | Ethanol | CACNA1D | 686    |
| DG | Ethanol | GABRB3  | 686    |
| DG | Ethanol | GABRA5  | 686    |
| DG | Ethanol | GABRA1  | 686    |
| DG | Ethanol | KCNJ9   | 686    |
| DG | Ethanol | SLC28A3 | 55.444 |
| DG | Ethanol | GLRA3   | 23     |
| DG | Ethanol | NAV2    | 22.373 |
| DG | Ethanol | CACNA1A | 22.373 |
| DG | Ethanol | MTNR1B  | 22.373 |
| DG | Ethanol | SLC44A4 | 22.373 |
| DG | Ethanol | TBR1    | 22.373 |
| DG | Ethanol | AOC1    | 22.373 |
| DG | Ethanol | HCRT    | 22.373 |
| DG | Ethanol | EZR     | 22.373 |
| DG | Ethanol | SLC9A6  | 22.373 |
| DG | Ethanol | GLRA4   | 22.373 |
| DG | Ethanol | NRP1    | 22.373 |
| DG | Ethanol | PLCB1   | 22.373 |
| DG | Ethanol | CALCA   | 22.373 |
| DG | Ethanol | ATP8B1  | 22.373 |
| DG | Ethanol | GABRD   | 686    |
| DG | Ethanol | GLRA2   | 686    |
| DG | Ethanol | KCNJ6   | 686    |
| DG | Ethanol | GABRG1  | 686    |
| DG | Ethanol | CHRNA3  | 686    |
| DG | Ethanol | HTR3D   | 686    |
| DG | Ethanol | KCNJ5   | 686    |
| DG | Ethanol | SLC29A2 | 686    |

|    |             |         |        |
|----|-------------|---------|--------|
| DG | Ethanol     | CHRNA9  | 686    |
| DG | Ethanol     | HTR3C   | 686    |
| DG | Ethanol     | ADRA1B  | 55.444 |
| DG | Ethanol     | HMGA2   | 22.373 |
| DG | Ethanol     | P2RX2   | 22.373 |
| DG | Ethanol     | ANK2    | 22.373 |
| DG | Ethanol     | SCN5A   | 22.373 |
| DG | Ethanol     | FLOT1   | 22.373 |
| DG | Ethanol     | ADRA1D  | 22.373 |
| DG | Ethanol     | MAOA    | 22.373 |
| DG | Ethanol     | RAB3B   | 22.373 |
| DG | Ethanol     | DRD4    | 22.373 |
| DG | Ethanol     | AOC3    | 22.373 |
| DG | Ethanol     | RNF207  | 22.373 |
| DG | Ethanol     | NPPA    | 22.373 |
| DG | Ethanol     | EPHB1   | 22.373 |
| DG | Ethanol     | PINK1   | 22.373 |
| DG | Ethanol     | KISS1   | 22.373 |
| DG | Tetradecane | KCND1   | 80.882 |
| DG | Tetradecane | GAMT    | 80.882 |
| DG | Tetradecane | CAT     | 80.882 |
| DG | Tetradecane | KCNC1   | 80.882 |
| DG | Tetradecane | KCND2   | 80.882 |
| DG | Tetradecane | KCND3   | 80.882 |
| DG | Tetradecane | KCNQ1   | 55.444 |
| DG | Tetradecane | CYGB    | 22.373 |
| DG | Tetradecane | IGF1    | 22.373 |
| DG | Tetradecane | EDN1    | 22.373 |
| DG | Tetradecane | CNTNAP4 | 22.373 |
| DG | Tetradecane | GRIN2A  | 22.373 |
| DG | Tetradecane | SPARC   | 22.373 |
| DG | Tetradecane | CRLF1   | 22.373 |
| DG | Tetradecane | ALDH1B1 | 22.373 |
| DG | Tetradecane | DARS    | 22.373 |
| DG | Tetradecane | MIP     | 22.373 |
| DG | Tetradecane | STX1A   | 22.373 |
| DG | Tetradecane | NRXN2   | 22.373 |
| DG | Tetradecane | DAB2IP  | 22.373 |
| DG | Tetradecane | KCNA3   | 80.882 |
| DG | Tetradecane | KCNC3   | 80.882 |
| DG | Tetradecane | KCNB1   | 80.882 |
| DG | Tetradecane | ADH1C   | 80.882 |
| DG | Tetradecane | ALDH2   | 80.882 |
| DG | Tetradecane | GUCY1B3 | 55.444 |
| DG | Tetradecane | FBP1    | 22.373 |
| DG | Tetradecane | NRXN3   | 22.373 |
| DG | Tetradecane | SHANK3  | 22.373 |
| DG | Tetradecane | OXT     | 22.373 |
| DG | Tetradecane | RNASE4  | 22.373 |
| DG | Tetradecane | SLC17A7 | 22.373 |
| DG | Tetradecane | SORCS3  | 22.373 |

|    |             |         |        |
|----|-------------|---------|--------|
| DG | Tetradecane | FADD    | 22.373 |
| DG | Tetradecane | LEP     | 22.373 |
| DG | Tetradecane | ANK3    | 22.373 |
| DG | Tetradecane | RYR3    | 22.373 |
| DG | Tetradecane | PAXBP1  | 22.373 |
| DG | Tetradecane | ADORA1  | 22.373 |
| DG | Tetradecane | CYP2E1  | 22.373 |
| DG | Tetradecane | PRKAB1  | 80.882 |
| DG | Tetradecane | KCNA1   | 80.882 |
| DG | Tetradecane | ADH1B   | 80.882 |
| DG | Tetradecane | KCNB2   | 80.882 |
| DG | Tetradecane | KCNA4   | 80.882 |
| DG | Tetradecane | GATM    | 55.444 |
| DG | Tetradecane | DGKI    | 22.373 |
| DG | Tetradecane | LRRC4B  | 22.373 |
| DG | Tetradecane | ACY3    | 22.373 |
| DG | Tetradecane | MAGI2   | 22.373 |
| DG | Tetradecane | RAB3A   | 22.373 |
| DG | Tetradecane | CYP11A1 | 22.373 |
| DG | Tetradecane | RNASE8  | 22.373 |
| DG | Tetradecane | SNTG2   | 22.373 |
| DG | Tetradecane | NLGN1   | 22.373 |
| DG | Tetradecane | KCNE5   | 22.373 |
| DG | Tetradecane | ZPR1    | 22.373 |
| DG | Tetradecane | PAX7    | 22.373 |
| DG | Tetradecane | ADH4    | 22.373 |
| DG | Tetradecane | ACY1    | 22.373 |
| DG | Tetradecane | ADH1A   | 80.882 |
| DG | Tetradecane | KCNA2   | 80.882 |
| DG | Tetradecane | DLG4    | 80.882 |
| DG | Tetradecane | KCNA5   | 80.882 |
| DG | Tetradecane | KCNA7   | 80.882 |
| DG | Tetradecane | KCNK4   | 55.444 |
| DG | Tetradecane | ADH7    | 22.373 |
| DG | Tetradecane | AQP8    | 22.373 |
| DG | Tetradecane | ASPA    | 22.373 |
| DG | Tetradecane | APOE    | 22.373 |
| DG | Tetradecane | MC4R    | 22.373 |
| DG | Tetradecane | SCN5A   | 22.373 |
| DG | Tetradecane | KCNIP2  | 22.373 |
| DG | Tetradecane | SCGB1A1 | 22.373 |
| DG | Tetradecane | CACNA1D | 22.373 |
| DG | Tetradecane | PPARD   | 22.373 |
| DG | Tetradecane | ALDH3B1 | 22.373 |
| DG | Tetradecane | ALDH3B2 | 22.373 |
| DG | Tetradecane | GJA5    | 22.373 |
| DG | Tetradecane | KCNA10  | 80.882 |
| DG | Tetradecane | TPO     | 80.882 |
| DG | Tetradecane | KCNC2   | 80.882 |
| DG | Tetradecane | RNASE1  | 80.882 |
| DG | Tetradecane | KCNA6   | 80.882 |

|    |             |         |        |
|----|-------------|---------|--------|
| DG | Tetradecane | IYD     | 55.444 |
| DG | Tetradecane | NFIB    | 22.373 |
| DG | Tetradecane | ARX     | 22.373 |
| DG | Tetradecane | NRXN1   | 22.373 |
| DG | Tetradecane | SOX15   | 22.373 |
| DG | Tetradecane | IL1B    | 22.373 |
| DG | Tetradecane | SCN10A  | 22.373 |
| DG | Tetradecane | GPX7    | 22.373 |
| DG | Tetradecane | OXTR    | 22.373 |
| DG | Tetradecane | RAPGEF2 | 22.373 |
| DG | Tetradecane | NKX2-1  | 22.373 |
| DG | Tetradecane | NPPA    | 22.373 |
| DG | Tetradecane | RNASE2  | 22.373 |
| DG | Tetradecane | FAS     | 22.373 |
| DG | Carvacrol   | GABRA2  | 80.882 |
| DG | Carvacrol   | TNF     | 80.882 |
| DG | Carvacrol   | GABRP   | 80.882 |
| DG | Carvacrol   | GABRQ   | 80.882 |
| DG | Carvacrol   | PDE4B   | 80.882 |
| DG | Carvacrol   | COLQ    | 55.444 |
| DG | Carvacrol   | SLC6A4  | 48     |
| DG | Carvacrol   | DRD3    | 48     |
| DG | Carvacrol   | SCN1A   | 23     |
| DG | Carvacrol   | SLC5A7  | 22.373 |
| DG | Carvacrol   | SIRT2   | 22.373 |
| DG | Carvacrol   | HCN4    | 22.373 |
| DG | Carvacrol   | NCKAP1L | 22.373 |
| DG | Carvacrol   | EIF2AK1 | 22.373 |
| DG | Carvacrol   | PRSS12  | 22.373 |
| DG | Carvacrol   | FGFR2   | 22.373 |
| DG | Carvacrol   | IL1RN   | 22.373 |
| DG | Carvacrol   | IFNG    | 22.373 |
| DG | Carvacrol   | ROCK2   | 22.373 |
| DG | Carvacrol   | CAMK2D  | 22.373 |
| DG | Carvacrol   | ROCK1   | 22.373 |
| DG | Carvacrol   | BMP4    | 22.373 |
| DG | Carvacrol   | AGRN    | 22.373 |
| DG | Carvacrol   | PDE2A   | 22.373 |
| DG | Carvacrol   | GRIN1   | 22.373 |
| DG | Carvacrol   | GABRD   | 80.882 |
| DG | Carvacrol   | GABRE   | 80.882 |
| DG | Carvacrol   | GABRA4  | 80.882 |
| DG | Carvacrol   | GABRB3  | 80.882 |
| DG | Carvacrol   | BCHE    | 80.882 |
| DG | Carvacrol   | LTA     | 55.444 |
| DG | Carvacrol   | DRD4    | 48     |
| DG | Carvacrol   | ALOX5   | 48     |
| DG | Carvacrol   | SCN3A   | 23     |
| DG | Carvacrol   | SEMA4D  | 22.373 |
| DG | Carvacrol   | MIF     | 22.373 |
| DG | Carvacrol   | FASLG   | 22.373 |

|    |           |         |        |
|----|-----------|---------|--------|
| DG | Carvacrol | CRP     | 22.373 |
| DG | Carvacrol | IL1B    | 22.373 |
| DG | Carvacrol | SLC44A4 | 22.373 |
| DG | Carvacrol | ANGPT1  | 22.373 |
| DG | Carvacrol | PLN     | 22.373 |
| DG | Carvacrol | HRC     | 22.373 |
| DG | Carvacrol | ADIRF   | 22.373 |
| DG | Carvacrol | IL10    | 22.373 |
| DG | Carvacrol | FNTA    | 22.373 |
| DG | Carvacrol | AHCY    | 22.373 |
| DG | Carvacrol | IKBKB   | 22.373 |
| DG | Carvacrol | CHDH    | 22.373 |
| DG | Carvacrol | HCN2    | 22.373 |
| DG | Carvacrol | PDE3A   | 80.882 |
| DG | Carvacrol | SCN2A   | 80.882 |
| DG | Carvacrol | GABRB2  | 80.882 |
| DG | Carvacrol | GABRA5  | 80.882 |
| DG | Carvacrol | GABRG2  | 80.882 |
| DG | Carvacrol | RXRA    | 55.444 |
| DG | Carvacrol | HTR7    | 48     |
| DG | Carvacrol | DRD5    | 48     |
| DG | Carvacrol | HMGA2   | 22.373 |
| DG | Carvacrol | NRG1    | 22.373 |
| DG | Carvacrol | DMGDH   | 22.373 |
| DG | Carvacrol | LGALS3  | 22.373 |
| DG | Carvacrol | TLR3    | 22.373 |
| DG | Carvacrol | SHH     | 22.373 |
| DG | Carvacrol | ADORA2B | 22.373 |
| DG | Carvacrol | AURKA   | 22.373 |
| DG | Carvacrol | DNM3    | 22.373 |
| DG | Carvacrol | TGFB2   | 22.373 |
| DG | Carvacrol | BDKRB2  | 22.373 |
| DG | Carvacrol | CDH8    | 22.373 |
| DG | Carvacrol | HPN     | 22.373 |
| DG | Carvacrol | APOA1   | 22.373 |
| DG | Carvacrol | IDO1    | 22.373 |
| DG | Carvacrol | SOX9    | 22.373 |
| DG | Carvacrol | GABRB1  | 80.882 |
| DG | Carvacrol | GABRA3  | 80.882 |
| DG | Carvacrol | ACHE    | 80.882 |
| DG | Carvacrol | GABRA6  | 80.882 |
| DG | Carvacrol | PDE3B   | 55.444 |
| DG | Carvacrol | SLC6A3  | 48     |
| DG | Carvacrol | HTR1A   | 48     |
| DG | Carvacrol | DRD1    | 48     |
| DG | Carvacrol | PDE5A   | 22.373 |
| DG | Carvacrol | CD74    | 22.373 |
| DG | Carvacrol | NKX3-1  | 22.373 |
| DG | Carvacrol | KLF4    | 22.373 |
| DG | Carvacrol | EPO     | 22.373 |
| DG | Carvacrol | RIPK1   | 22.373 |

|    |                             |         |         |
|----|-----------------------------|---------|---------|
| DG | Carvacrol                   | ALDH7A1 | 22.373  |
| DG | Carvacrol                   | WNT2    | 22.373  |
| DG | Carvacrol                   | FCER2   | 22.373  |
| DG | Carvacrol                   | RAPGEF2 | 22.373  |
| DG | Carvacrol                   | ASCL1   | 22.373  |
| DG | Carvacrol                   | NCOA1   | 22.373  |
| DG | Carvacrol                   | KMT2A   | 22.373  |
| DG | Carvacrol                   | ARHGEF2 | 22.373  |
| DG | Carvacrol                   | CTNNB1  | 22.373  |
| DG | Carvacrol                   | CAMK2G  | 22.373  |
| DG | Carvacrol                   | GABRG3  | 80.882  |
| DG | Carvacrol                   | GABRG1  | 80.882  |
| DG | Carvacrol                   | SCN4A   | 80.882  |
| DG | Carvacrol                   | GABRA1  | 80.882  |
| DG | Carvacrol                   | PDE4D   | 55.444  |
| DG | Carvacrol                   | DRD2    | 48      |
| DG | Carvacrol                   | DBH     | 48      |
| DG | Carvacrol                   | SLC6A2  | 48      |
| DG | Carvacrol                   | APOA2   | 22.373  |
| DG | Carvacrol                   | HPX     | 22.373  |
| DG | Carvacrol                   | SIX3    | 22.373  |
| DG | Carvacrol                   | LILRB1  | 22.373  |
| DG | Carvacrol                   | MAP2K5  | 22.373  |
| DG | Carvacrol                   | FGF10   | 22.373  |
| DG | Carvacrol                   | FADD    | 22.373  |
| DG | Carvacrol                   | YBX3    | 22.373  |
| DG | Carvacrol                   | WNT2B   | 22.373  |
| DG | Carvacrol                   | TIRAP   | 22.373  |
| DG | Carvacrol                   | ENPP6   | 22.373  |
| DG | Carvacrol                   | IL6     | 22.373  |
| DG | Carvacrol                   | NOD2    | 22.373  |
| DG | Carvacrol                   | IL4     | 22.373  |
| DG | Carvacrol                   | CHKA    | 22.373  |
| DG | Carvacrol                   | FAS     | 22.373  |
| DG | 2',4'-Dihydroxyacetophenone | PTGS1   | 48      |
| DG | 2',4'-Dihydroxyacetophenone | CHRM4   | 23      |
| DG | 2',4'-Dihydroxyacetophenone | PTGS2   | 48      |
| DG | 2',4'-Dihydroxyacetophenone | CHRM3   | 23      |
| DG | 2',4'-Dihydroxyacetophenone | CHRM1   | 23      |
| DG | 2',4'-Dihydroxyacetophenone | CHRM2   | 23      |
| DG | Uridine                     | TYMS    | 122.778 |
| DG | Uridine                     | POLA1   | 48      |
| DG | Uridine                     | GCDH    | 23      |
| DG | Uridine                     | POR     | 23      |
| DG | Uridine                     | TXNRD1  | 23      |
| DG | Uridine                     | AIFM1   | 23      |
| DG | Uridine                     | DNMT1   | 23      |
| DG | Uridine                     | AK5     | 22.373  |
| DG | Uridine                     | AK9     | 22.373  |
| DG | Uridine                     | NT5C2   | 80.882  |
| DG | Uridine                     | PNP     | 48      |

|    |              |         |        |
|----|--------------|---------|--------|
| DG | Uridine      | ERO1B   | 23     |
| DG | Uridine      | CYB5R1  | 23     |
| DG | Uridine      | ACADS   | 23     |
| DG | Uridine      | ACOX1   | 23     |
| DG | Uridine      | ACAD8   | 23     |
| DG | Uridine      | GUK1    | 22.373 |
| DG | Uridine      | NUDT12  | 22.373 |
| DG | Uridine      | ADK     | 80.882 |
| DG | Uridine      | POLB    | 48     |
| DG | Uridine      | IVD     | 23     |
| DG | Uridine      | MAOB    | 23     |
| DG | Uridine      | CYB5R3  | 23     |
| DG | Uridine      | ACADM   | 23     |
| DG | Uridine      | NOS1    | 23     |
| DG | Uridine      | ANKH    | 22.373 |
| DG | Uridine      | IMPDH2  | 22.373 |
| DG | Uridine      | IMPDH1  | 80.882 |
| DG | Uridine      | TERT    | 48     |
| DG | Uridine      | NQO2    | 23     |
| DG | Uridine      | FDXR    | 23     |
| DG | Uridine      | MAOA    | 23     |
| DG | Uridine      | NQO1    | 23     |
| DG | Uridine      | DLD     | 23     |
| DG | Uridine      | ENPP3   | 22.373 |
| DG | Uridine      | ENPP1   | 80.882 |
| DG | Uridine      | GSR     | 23     |
| DG | Uridine      | DPYD    | 23     |
| DG | Uridine      | DAO     | 23     |
| DG | Uridine      | IL4I1   | 23     |
| DG | Uridine      | XDH     | 23     |
| DG | Uridine      | GFER    | 23     |
| DG | Uridine      | APRT    | 22.373 |
| DG | Beta-Elemene | KCND1   | 80.882 |
| DG | Beta-Elemene | GAMT    | 80.882 |
| DG | Beta-Elemene | CAT     | 80.882 |
| DG | Beta-Elemene | KCNC1   | 80.882 |
| DG | Beta-Elemene | KCND2   | 80.882 |
| DG | Beta-Elemene | KCND3   | 80.882 |
| DG | Beta-Elemene | KCNQ1   | 55.444 |
| DG | Beta-Elemene | CYGB    | 22.373 |
| DG | Beta-Elemene | IGF1    | 22.373 |
| DG | Beta-Elemene | EDN1    | 22.373 |
| DG | Beta-Elemene | CNTNAP4 | 22.373 |
| DG | Beta-Elemene | GRIN2A  | 22.373 |
| DG | Beta-Elemene | SPARC   | 22.373 |
| DG | Beta-Elemene | CRLF1   | 22.373 |
| DG | Beta-Elemene | ALDH1B1 | 22.373 |
| DG | Beta-Elemene | DARS    | 22.373 |
| DG | Beta-Elemene | MIP     | 22.373 |
| DG | Beta-Elemene | STX1A   | 22.373 |
| DG | Beta-Elemene | NRXN2   | 22.373 |



|    |              |         |        |
|----|--------------|---------|--------|
| DG | Beta-Elemene | DAB2IP  | 22.373 |
| DG | Beta-Elemene | KCNA3   | 80.882 |
| DG | Beta-Elemene | KCNC3   | 80.882 |
| DG | Beta-Elemene | KCNB1   | 80.882 |
| DG | Beta-Elemene | ADH1C   | 80.882 |
| DG | Beta-Elemene | ALDH2   | 80.882 |
| DG | Beta-Elemene | GUCY1B3 | 55.444 |
| DG | Beta-Elemene | FBP1    | 22.373 |
| DG | Beta-Elemene | NRXN3   | 22.373 |
| DG | Beta-Elemene | SHANK3  | 22.373 |
| DG | Beta-Elemene | OXT     | 22.373 |
| DG | Beta-Elemene | RNASE4  | 22.373 |
| DG | Beta-Elemene | SLC17A7 | 22.373 |
| DG | Beta-Elemene | SORCS3  | 22.373 |
| DG | Beta-Elemene | FADD    | 22.373 |
| DG | Beta-Elemene | LEP     | 22.373 |
| DG | Beta-Elemene | ANK3    | 22.373 |
| DG | Beta-Elemene | RYR3    | 22.373 |
| DG | Beta-Elemene | PAXBP1  | 22.373 |
| DG | Beta-Elemene | ADORA1  | 22.373 |
| DG | Beta-Elemene | CYP2E1  | 22.373 |
| DG | Beta-Elemene | PRKAB1  | 80.882 |
| DG | Beta-Elemene | KCNA1   | 80.882 |
| DG | Beta-Elemene | ADH1B   | 80.882 |
| DG | Beta-Elemene | KCNB2   | 80.882 |
| DG | Beta-Elemene | KCNA4   | 80.882 |
| DG | Beta-Elemene | GATM    | 55.444 |
| DG | Beta-Elemene | DGKI    | 22.373 |
| DG | Beta-Elemene | LRRC4B  | 22.373 |
| DG | Beta-Elemene | ACY3    | 22.373 |
| DG | Beta-Elemene | MAGI2   | 22.373 |
| DG | Beta-Elemene | RAB3A   | 22.373 |
| DG | Beta-Elemene | CYP11A1 | 22.373 |
| DG | Beta-Elemene | RNASE8  | 22.373 |
| DG | Beta-Elemene | SNTG2   | 22.373 |
| DG | Beta-Elemene | NLGN1   | 22.373 |
| DG | Beta-Elemene | KCNE5   | 22.373 |
| DG | Beta-Elemene | ZPR1    | 22.373 |
| DG | Beta-Elemene | PAX7    | 22.373 |
| DG | Beta-Elemene | ADH4    | 22.373 |
| DG | Beta-Elemene | ACY1    | 22.373 |
| DG | Beta-Elemene | ADH1A   | 80.882 |
| DG | Beta-Elemene | KCNA2   | 80.882 |
| DG | Beta-Elemene | DLG4    | 80.882 |
| DG | Beta-Elemene | KCNA5   | 80.882 |
| DG | Beta-Elemene | KCNA7   | 80.882 |
| DG | Beta-Elemene | KCNK4   | 55.444 |
| DG | Beta-Elemene | ADH7    | 22.373 |
| DG | Beta-Elemene | AQP8    | 22.373 |
| DG | Beta-Elemene | ASPA    | 22.373 |
| DG | Beta-Elemene | APOE    | 22.373 |

|    |              |          |         |
|----|--------------|----------|---------|
| DG | Beta-Elemene | MC4R     | 22.373  |
| DG | Beta-Elemene | SCN5A    | 22.373  |
| DG | Beta-Elemene | KCNIP2   | 22.373  |
| DG | Beta-Elemene | SCGB1A1  | 22.373  |
| DG | Beta-Elemene | CACNA1D  | 22.373  |
| DG | Beta-Elemene | PPARD    | 22.373  |
| DG | Beta-Elemene | ALDH3B1  | 22.373  |
| DG | Beta-Elemene | ALDH3B2  | 22.373  |
| DG | Beta-Elemene | GJA5     | 22.373  |
| DG | Beta-Elemene | KCNA10   | 80.882  |
| DG | Beta-Elemene | TPO      | 80.882  |
| DG | Beta-Elemene | KCNC2    | 80.882  |
| DG | Beta-Elemene | RNASE1   | 80.882  |
| DG | Beta-Elemene | KCNA6    | 80.882  |
| DG | Beta-Elemene | IYD      | 55.444  |
| DG | Beta-Elemene | NFIB     | 22.373  |
| DG | Beta-Elemene | ARX      | 22.373  |
| DG | Beta-Elemene | NRXN1    | 22.373  |
| DG | Beta-Elemene | SOX15    | 22.373  |
| DG | Beta-Elemene | IL1B     | 22.373  |
| DG | Beta-Elemene | SCN10A   | 22.373  |
| DG | Beta-Elemene | GPX7     | 22.373  |
| DG | Beta-Elemene | OXTR     | 22.373  |
| DG | Beta-Elemene | RAPGEF2  | 22.373  |
| DG | Beta-Elemene | NKX2-1   | 22.373  |
| DG | Beta-Elemene | NPPA     | 22.373  |
| DG | Beta-Elemene | RNASE2   | 22.373  |
| DG | Beta-Elemene | FAS      | 22.373  |
| DG | Azelaic Acid | AKR1D1   | 686     |
| DG | Azelaic Acid | ABAT     | 122.778 |
| DG | Azelaic Acid | COX5B    | 122.778 |
| DG | Azelaic Acid | SCN7A    | 122.778 |
| DG | Azelaic Acid | COX5A    | 122.778 |
| DG | Azelaic Acid | COX4I1   | 122.778 |
| DG | Azelaic Acid | SCN4A    | 122.778 |
| DG | Azelaic Acid | CES1     | 122.778 |
| DG | Azelaic Acid | COX2     | 122.778 |
| DG | Azelaic Acid | SUCLG2   | 80.882  |
| DG | Azelaic Acid | SLC25A10 | 80.882  |
| DG | Azelaic Acid | SUCNR1   | 80.882  |
| DG | Azelaic Acid | OXCT1    | 80.882  |
| DG | Azelaic Acid | SDHA     | 80.882  |
| DG | Azelaic Acid | DCT      | 55.444  |
| DG | Azelaic Acid | JMJD6    | 55.444  |
| DG | Azelaic Acid | HSD17B11 | 55.444  |
| DG | Azelaic Acid | P4HB     | 55.444  |
| DG | Azelaic Acid | GRIN3B   | 48      |
| DG | Azelaic Acid | CACNA1B  | 48      |
| DG | Azelaic Acid | GRIN3A   | 48      |
| DG | Azelaic Acid | GRIN1    | 48      |
| DG | Azelaic Acid | SIRT1    | 22.373  |

|    |              |          |         |
|----|--------------|----------|---------|
| DG | Azelaic Acid | SIX1     | 22.373  |
| DG | Azelaic Acid | OSBPL8   | 22.373  |
| DG | Azelaic Acid | UBE2B    | 22.373  |
| DG | Azelaic Acid | STIM2    | 22.373  |
| DG | Azelaic Acid | COLGALT1 | 22.373  |
| DG | Azelaic Acid | ARID1A   | 22.373  |
| DG | Azelaic Acid | ACOT4    | 22.373  |
| DG | Azelaic Acid | SLC25A12 | 22.373  |
| DG | Azelaic Acid | CDH11    | 22.373  |
| DG | Azelaic Acid | BDKRB2   | 22.373  |
| DG | Azelaic Acid | SMAD7    | 22.373  |
| DG | Azelaic Acid | WNT10B   | 22.373  |
| DG | Azelaic Acid | STAR     | 22.373  |
| DG | Azelaic Acid | CAMK2D   | 22.373  |
| DG | Azelaic Acid | HTT      | 22.373  |
| DG | Azelaic Acid | TST      | 22.373  |
| DG | Azelaic Acid | TMEM110  | 22.373  |
| DG | Azelaic Acid | EPHA4    | 22.373  |
| DG | Azelaic Acid | EDA      | 22.373  |
| DG | Azelaic Acid | KCNQ1    | 22.373  |
| DG | Azelaic Acid | UGT1A1   | 22.373  |
| DG | Azelaic Acid | PLOD2    | 22.373  |
| DG | Azelaic Acid | SLC25A1  | 22.373  |
| DG | Azelaic Acid | TYR      | 686     |
| DG | Azelaic Acid | SCN1A    | 122.778 |
| DG | Azelaic Acid | COX7C    | 122.778 |
| DG | Azelaic Acid | SCN5A    | 122.778 |
| DG | Azelaic Acid | COX3     | 122.778 |
| DG | Azelaic Acid | HDAC9    | 122.778 |
| DG | Azelaic Acid | SCN4B    | 122.778 |
| DG | Azelaic Acid | ACADSB   | 122.778 |
| DG | Azelaic Acid | OGDH     | 122.778 |
| DG | Azelaic Acid | SLC13A2  | 80.882  |
| DG | Azelaic Acid | P3H3     | 80.882  |
| DG | Azelaic Acid | SLC13A3  | 80.882  |
| DG | Azelaic Acid | PLOD3    | 80.882  |
| DG | Azelaic Acid | P4HA2    | 80.882  |
| DG | Azelaic Acid | AKR1C3   | 55.444  |
| DG | Azelaic Acid | SLC13A4  | 55.444  |
| DG | Azelaic Acid | TYRP1    | 55.444  |
| DG | Azelaic Acid | CACNA2D1 | 48      |
| DG | Azelaic Acid | CACNA2D2 | 48      |
| DG | Azelaic Acid | GRIN2C   | 48      |
| DG | Azelaic Acid | SLC7A1   | 48      |
| DG | Azelaic Acid | HDAC1    | 23      |
| DG | Azelaic Acid | SHMT1    | 22.373  |
| DG | Azelaic Acid | BDH1     | 22.373  |
| DG | Azelaic Acid | SPI1     | 22.373  |
| DG | Azelaic Acid | CYP1A2   | 22.373  |
| DG | Azelaic Acid | PKD2     | 22.373  |
| DG | Azelaic Acid | NEDD4    | 22.373  |

|    |              |          |         |
|----|--------------|----------|---------|
| DG | Azelaic Acid | EGLN2    | 22.373  |
| DG | Azelaic Acid | PHGDH    | 22.373  |
| DG | Azelaic Acid | YBX3     | 22.373  |
| DG | Azelaic Acid | CACNA1D  | 22.373  |
| DG | Azelaic Acid | PRPH     | 22.373  |
| DG | Azelaic Acid | PRDM8    | 22.373  |
| DG | Azelaic Acid | OGFOD1   | 22.373  |
| DG | Azelaic Acid | DLST     | 22.373  |
| DG | Azelaic Acid | AP3D1    | 22.373  |
| DG | Azelaic Acid | IL10     | 22.373  |
| DG | Azelaic Acid | SLC1A6   | 22.373  |
| DG | Azelaic Acid | CDC42    | 22.373  |
| DG | Azelaic Acid | OCA2     | 22.373  |
| DG | Azelaic Acid | HACL1    | 22.373  |
| DG | Azelaic Acid | CASQ2    | 22.373  |
| DG | Azelaic Acid | DLD      | 22.373  |
| DG | Azelaic Acid | CYP1A1   | 22.373  |
| DG | Azelaic Acid | SRD5A2   | 686     |
| DG | Azelaic Acid | ESRRG    | 122.778 |
| DG | Azelaic Acid | COX1     | 122.778 |
| DG | Azelaic Acid | SCN10A   | 122.778 |
| DG | Azelaic Acid | AR       | 122.778 |
| DG | Azelaic Acid | PLA2G1B  | 122.778 |
| DG | Azelaic Acid | ADH1C    | 122.778 |
| DG | Azelaic Acid | SCN8A    | 122.778 |
| DG | Azelaic Acid | HDAC2    | 122.778 |
| DG | Azelaic Acid | SLC13A1  | 80.882  |
| DG | Azelaic Acid | OXCT2    | 80.882  |
| DG | Azelaic Acid | ASPH     | 80.882  |
| DG | Azelaic Acid | P4HA1    | 80.882  |
| DG | Azelaic Acid | SUCLA2   | 80.882  |
| DG | Azelaic Acid | CRTAP    | 55.444  |
| DG | Azelaic Acid | SDHAF2   | 55.444  |
| DG | Azelaic Acid | HIF1AN   | 55.444  |
| DG | Azelaic Acid | PLAT     | 48      |
| DG | Azelaic Acid | GRIN2A   | 48      |
| DG | Azelaic Acid | GRIN2B   | 48      |
| DG | Azelaic Acid | SLC7A4   | 48      |
| DG | Azelaic Acid | GPD1L    | 22.373  |
| DG | Azelaic Acid | SUGCT    | 22.373  |
| DG | Azelaic Acid | COLGALT2 | 22.373  |
| DG | Azelaic Acid | SUOX     | 22.373  |
| DG | Azelaic Acid | CCL5     | 22.373  |
| DG | Azelaic Acid | ALDH9A1  | 22.373  |
| DG | Azelaic Acid | CYP11A1  | 22.373  |
| DG | Azelaic Acid | ACAT1    | 22.373  |
| DG | Azelaic Acid | PNLIPRP2 | 22.373  |
| DG | Azelaic Acid | 8-Mar    | 22.373  |
| DG | Azelaic Acid | DDC      | 22.373  |
| DG | Azelaic Acid | BCKDHB   | 22.373  |
| DG | Azelaic Acid | UROD     | 22.373  |

|    |              |         |         |
|----|--------------|---------|---------|
| DG | Azelaic Acid | SLC38A7 | 22.373  |
| DG | Azelaic Acid | PF4     | 22.373  |
| DG | Azelaic Acid | MYO5A   | 22.373  |
| DG | Azelaic Acid | EGLN3   | 22.373  |
| DG | Azelaic Acid | NPPA    | 22.373  |
| DG | Azelaic Acid | ARHGEF2 | 22.373  |
| DG | Azelaic Acid | HSD17B8 | 22.373  |
| DG | Azelaic Acid | RYR2    | 22.373  |
| DG | Azelaic Acid | GJA5    | 22.373  |
| DG | Azelaic Acid | GNAS    | 22.373  |
| DG | Azelaic Acid | SULT2A1 | 22.373  |
| DG | Azelaic Acid | SCN11A  | 122.778 |
| DG | Azelaic Acid | SCN3B   | 122.778 |
| DG | Azelaic Acid | SCN3A   | 122.778 |
| DG | Azelaic Acid | ALDH5A1 | 122.778 |
| DG | Azelaic Acid | COX7A1  | 122.778 |
| DG | Azelaic Acid | COX6A2  | 122.778 |
| DG | Azelaic Acid | COX6B1  | 122.778 |
| DG | Azelaic Acid | COX7B   | 122.778 |
| DG | Azelaic Acid | COX8A   | 122.778 |
| DG | Azelaic Acid | SUCLG1  | 80.882  |
| DG | Azelaic Acid | TMLHE   | 80.882  |
| DG | Azelaic Acid | BBOX1   | 80.882  |
| DG | Azelaic Acid | SDHC    | 80.882  |
| DG | Azelaic Acid | SDHD    | 80.882  |
| DG | Azelaic Acid | SLIT2   | 55.444  |
| DG | Azelaic Acid | SLC1A3  | 55.444  |
| DG | Azelaic Acid | UROS    | 55.444  |
| DG | Azelaic Acid | SLC7A2  | 48      |
| DG | Azelaic Acid | TOP1    | 48      |
| DG | Azelaic Acid | SLC7A3  | 48      |
| DG | Azelaic Acid | GRIN2D  | 48      |
| DG | Azelaic Acid | SRD5A1  | 22.373  |
| DG | Azelaic Acid | ACSS2   | 22.373  |
| DG | Azelaic Acid | SIX4    | 22.373  |
| DG | Azelaic Acid | CCL2    | 22.373  |
| DG | Azelaic Acid | ANK2    | 22.373  |
| DG | Azelaic Acid | TH      | 22.373  |
| DG | Azelaic Acid | DHODH   | 22.373  |
| DG | Azelaic Acid | GALC    | 22.373  |
| DG | Azelaic Acid | CYP39A1 | 22.373  |
| DG | Azelaic Acid | STIM1   | 22.373  |
| DG | Azelaic Acid | DHTKD1  | 22.373  |
| DG | Azelaic Acid | KCNE5   | 22.373  |
| DG | Azelaic Acid | UGT8    | 22.373  |
| DG | Azelaic Acid | ACSS1   | 22.373  |
| DG | Azelaic Acid | CRACR2A | 22.373  |
| DG | Azelaic Acid | ILVBL   | 22.373  |
| DG | Azelaic Acid | OGDHL   | 22.373  |
| DG | Azelaic Acid | ACADM   | 22.373  |
| DG | Azelaic Acid | EGLN1   | 22.373  |

|    |                     |          |         |
|----|---------------------|----------|---------|
| DG | Azelaic Acid        | CTNNB1   | 22.373  |
| DG | Azelaic Acid        | HAP1     | 22.373  |
| DG | Azelaic Acid        | DHRS9    | 22.373  |
| DG | Azelaic Acid        | SLC25A13 | 22.373  |
| DG | Azelaic Acid        | NFX1     | 22.373  |
| DG | Azelaic Acid        | SCN2B    | 122.778 |
| DG | Azelaic Acid        | COX6C    | 122.778 |
| DG | Azelaic Acid        | AKR1C2   | 122.778 |
| DG | Azelaic Acid        | SCN2A    | 122.778 |
| DG | Azelaic Acid        | FECH     | 122.778 |
| DG | Azelaic Acid        | SCN9A    | 122.778 |
| DG | Azelaic Acid        | FABP6    | 122.778 |
| DG | Azelaic Acid        | SCN1B    | 122.778 |
| DG | Azelaic Acid        | NR1H4    | 122.778 |
| DG | Azelaic Acid        | HSD17B6  | 80.882  |
| DG | Azelaic Acid        | PLOD1    | 80.882  |
| DG | Azelaic Acid        | SDHB     | 80.882  |
| DG | Azelaic Acid        | P3H2     | 80.882  |
| DG | Azelaic Acid        | P3H1     | 80.882  |
| DG | Azelaic Acid        | ACO2     | 55.444  |
| DG | Azelaic Acid        | SALL1    | 55.444  |
| DG | Azelaic Acid        | SLC13A5  | 55.444  |
| DG | Azelaic Acid        | CACNA1A  | 48      |
| DG | Azelaic Acid        | PLG      | 48      |
| DG | Azelaic Acid        | KARS     | 48      |
| DG | Azelaic Acid        | ADORA1   | 48      |
| DG | Azelaic Acid        | FBXO45   | 22.373  |
| DG | Azelaic Acid        | ARV1     | 22.373  |
| DG | Azelaic Acid        | MRPS36   | 22.373  |
| DG | Azelaic Acid        | BCKDK    | 22.373  |
| DG | Azelaic Acid        | HSD17B2  | 22.373  |
| DG | Azelaic Acid        | EPO      | 22.373  |
| DG | Azelaic Acid        | CLN3     | 22.373  |
| DG | Azelaic Acid        | PLCG2    | 22.373  |
| DG | Azelaic Acid        | BCKDHA   | 22.373  |
| DG | Azelaic Acid        | GAL3ST1  | 22.373  |
| DG | Azelaic Acid        | NEDD4L   | 22.373  |
| DG | Azelaic Acid        | SRD5A3   | 22.373  |
| DG | Azelaic Acid        | ETHE1    | 22.373  |
| DG | Azelaic Acid        | CYP4B1   | 22.373  |
| DG | Azelaic Acid        | HSD17B1  | 22.373  |
| DG | Azelaic Acid        | CAV3     | 22.373  |
| DG | Azelaic Acid        | KCNA5    | 22.373  |
| DG | Azelaic Acid        | SQRDL    | 22.373  |
| DG | Azelaic Acid        | ETFDH    | 22.373  |
| DG | Azelaic Acid        | P4HA3    | 22.373  |
| DG | Azelaic Acid        | PCSK9    | 22.373  |
| DG | Azelaic Acid        | GPR143   | 22.373  |
| DG | Azelaic Acid        | SFXN5    | 22.373  |
| DG | Azelaic Acid        | DBT      | 22.373  |
| DG | Chrysanthemaxanthin | ADA      | 23      |

|    |                                              |         |         |
|----|----------------------------------------------|---------|---------|
| DG | Chrysanthemaxanthin                          | ITFG2   | 22.373  |
| DG | Chrysanthemaxanthin                          | DGUOK   | 22.373  |
| DG | Chrysanthemaxanthin                          | XDH     | 22.373  |
| DG | Chrysanthemaxanthin                          | ADORA1  | 22.373  |
| DG | 2-Methyl-Dodecane-5-One                      | SCN11A  | 48      |
| DG | 2-Methyl-Dodecane-5-One                      | SCN3A   | 48      |
| DG | 2-Methyl-Dodecane-5-One                      | ALDH5A1 | 48      |
| DG | 2-Methyl-Dodecane-5-One                      | SCN4A   | 48      |
| DG | 2-Methyl-Dodecane-5-One                      | SCN1B   | 48      |
| DG | 2-Methyl-Dodecane-5-One                      | SCN2B   | 48      |
| DG | 2-Methyl-Dodecane-5-One                      | SCN7A   | 48      |
| DG | 2-Methyl-Dodecane-5-One                      | SCN2A   | 48      |
| DG | 2-Methyl-Dodecane-5-One                      | SCN4B   | 48      |
| DG | 2-Methyl-Dodecane-5-One                      | OGDH    | 48      |
| DG | 2-Methyl-Dodecane-5-One                      | ABAT    | 48      |
| DG | 2-Methyl-Dodecane-5-One                      | SCN5A   | 48      |
| DG | 2-Methyl-Dodecane-5-One                      | HDAC9   | 48      |
| DG | 2-Methyl-Dodecane-5-One                      | SRD5A2  | 48      |
| DG | 2-Methyl-Dodecane-5-One                      | HDAC2   | 48      |
| DG | 2-Methyl-Dodecane-5-One                      | SCN1A   | 48      |
| DG | 2-Methyl-Dodecane-5-One                      | SCN10A  | 48      |
| DG | 2-Methyl-Dodecane-5-One                      | TYR     | 48      |
| DG | 2-Methyl-Dodecane-5-One                      | ACADSB  | 48      |
| DG | 2-Methyl-Dodecane-5-One                      | SCN3B   | 48      |
| DG | 2-Methyl-Dodecane-5-One                      | AKR1D1  | 48      |
| DG | 2-Methyl-Dodecane-5-One                      | SCN9A   | 48      |
| DG | 2-Methyl-Dodecane-5-One                      | SCN8A   | 48      |
| DG | 24,24-Dimethyl-5alpha-Cholesta-8-En-3beta-Ol | ESR1    | 122.778 |
| DG | 24,24-Dimethyl-5alpha-Cholesta-8-En-3beta-Ol | SNW1    | 55.444  |
| DG | 24,24-Dimethyl-5alpha-Cholesta-8-En-3beta-Ol | NFKB1   | 22.373  |
| DG | 24,24-Dimethyl-5alpha-Cholesta-8-En-3beta-Ol | MED1    | 22.373  |
| DG | 24,24-Dimethyl-5alpha-Cholesta-8-En-3beta-Ol | GF11    | 22.373  |
| DG | 24,24-Dimethyl-5alpha-Cholesta-8-En-3beta-Ol | KL      | 22.373  |
| DG | 24,24-Dimethyl-5alpha-Cholesta-8-En-3beta-Ol | CYP27A1 | 22.373  |
| DG | 24,24-Dimethyl-5alpha-Cholesta-8-En-3beta-Ol | TRIM24  | 22.373  |
| DG | 24,24-Dimethyl-5alpha-Cholesta-8-En-3beta-Ol | PGR     | 122.778 |
| DG | 24,24-Dimethyl-5alpha-Cholesta-8-En-3beta-Ol | SRD5A1  | 48      |
| DG | 24,24-Dimethyl-5alpha-Cholesta-8-En-3beta-Ol | AKR1C3  | 22.373  |
| DG | 24,24-Dimethyl-5alpha-Cholesta-8-En-3beta-Ol | SNAI1   | 22.373  |
| DG | 24,24-Dimethyl-5alpha-Cholesta-8-En-3beta-Ol | LANCL2  | 22.373  |
| DG | 24,24-Dimethyl-5alpha-Cholesta-8-En-3beta-Ol | CYP2R1  | 22.373  |
| DG | 24,24-Dimethyl-5alpha-Cholesta-8-En-3beta-Ol | KANK2   | 22.373  |
| DG | 24,24-Dimethyl-5alpha-Cholesta-8-En-3beta-Ol | VDR     | 80.882  |
| DG | 24,24-Dimethyl-5alpha-Cholesta-8-En-3beta-Ol | AR      | 48      |
| DG | 24,24-Dimethyl-5alpha-Cholesta-8-En-3beta-Ol | CYP24A1 | 22.373  |
| DG | 24,24-Dimethyl-5alpha-Cholesta-8-En-3beta-Ol | CYP3A4  | 22.373  |
| DG | 24,24-Dimethyl-5alpha-Cholesta-8-En-3beta-Ol | WNT4    | 22.373  |
| DG | 24,24-Dimethyl-5alpha-Cholesta-8-En-3beta-Ol | PML     | 22.373  |
| DG | 24,24-Dimethyl-5alpha-Cholesta-8-En-3beta-Ol | IRX5    | 22.373  |
| DG | 24,24-Dimethyl-5alpha-Cholesta-8-En-3beta-Ol | CYP27B1 | 80.882  |
| DG | 24,24-Dimethyl-5alpha-Cholesta-8-En-3beta-Ol | NR3C1   | 48      |

|    |                                              |         |        |
|----|----------------------------------------------|---------|--------|
| DG | 24,24-Dimethyl-5alpha-Cholesta-8-En-3beta-Ol | GPBAR1  | 22.373 |
| DG | 24,24-Dimethyl-5alpha-Cholesta-8-En-3beta-Ol | CALB1   | 22.373 |
| DG | 24,24-Dimethyl-5alpha-Cholesta-8-En-3beta-Ol | TCF3    | 22.373 |
| DG | 24,24-Dimethyl-5alpha-Cholesta-8-En-3beta-Ol | B4GALT1 | 22.373 |
| DG | 24,24-Dimethyl-5alpha-Cholesta-8-En-3beta-Ol | RXRA    | 22.373 |
| DG | 24,24-Dimethyl-5alpha-Cholesta-8-En-3beta-Ol | GC      | 55.444 |
| DG | 24,24-Dimethyl-5alpha-Cholesta-8-En-3beta-Ol | ANXA1   | 48     |
| DG | 24,24-Dimethyl-5alpha-Cholesta-8-En-3beta-Ol | SNAI2   | 22.373 |
| DG | 24,24-Dimethyl-5alpha-Cholesta-8-En-3beta-Ol | FGF23   | 22.373 |
| DG | 24,24-Dimethyl-5alpha-Cholesta-8-En-3beta-Ol | BAX     | 22.373 |
| DG | 24,24-Dimethyl-5alpha-Cholesta-8-En-3beta-Ol | S100G   | 22.373 |
| DG | 24,24-Dimethyl-5alpha-Cholesta-8-En-3beta-Ol | NR1H4   | 22.373 |
| DG | Scopolin                                     | TOP2A   | 23     |
| DG | Scopolin                                     | TUBA3C  | 23     |
| DG | Scopolin                                     | TOP2B   | 23     |
| DG | Scopolin                                     | TUBB    | 23     |
| DG | Scopolin                                     | TUBA1C  | 23     |
| DG | Scopolin                                     | TUBA3D  | 23     |
| DG | Scopolin                                     | TUBB4A  | 23     |
| DG | Scopolin                                     | TUBB2A  | 23     |
| DG | Scopolin                                     | TUBA1A  | 23     |
| DG | Scopolin                                     | TUBB2B  | 23     |
| DG | Scopolin                                     | TUBA1B  | 23     |
| DG | Scopolin                                     | TUBB4B  | 23     |
| DG | Scopolin                                     | TUBA4A  | 23     |
| DG | Dimethyl Azelate                             | NPR1    | 80.882 |
| DG | Dimethyl Azelate                             | ESRRG   | 48     |
| DG | Dimethyl Azelate                             | COX1    | 48     |
| DG | Dimethyl Azelate                             | SCN10A  | 48     |
| DG | Dimethyl Azelate                             | COX3    | 48     |
| DG | Dimethyl Azelate                             | HDAC9   | 48     |
| DG | Dimethyl Azelate                             | SCN4A   | 48     |
| DG | Dimethyl Azelate                             | CES1    | 48     |
| DG | Dimethyl Azelate                             | SCN1B   | 48     |
| DG | Dimethyl Azelate                             | NR1H4   | 48     |
| DG | Dimethyl Azelate                             | SCN11A  | 48     |
| DG | Dimethyl Azelate                             | SCN3B   | 48     |
| DG | Dimethyl Azelate                             | SCN3A   | 48     |
| DG | Dimethyl Azelate                             | AKR1D1  | 48     |
| DG | Dimethyl Azelate                             | AR      | 48     |
| DG | Dimethyl Azelate                             | PLA2G1B | 48     |
| DG | Dimethyl Azelate                             | SCN4B   | 48     |
| DG | Dimethyl Azelate                             | SRD5A2  | 48     |
| DG | Dimethyl Azelate                             | COX2    | 48     |
| DG | Dimethyl Azelate                             | NPR3    | 22.373 |
| DG | Dimethyl Azelate                             | SCN2B   | 48     |
| DG | Dimethyl Azelate                             | COX6C   | 48     |
| DG | Dimethyl Azelate                             | AKR1C2  | 48     |
| DG | Dimethyl Azelate                             | ALDH5A1 | 48     |
| DG | Dimethyl Azelate                             | COX7A1  | 48     |
| DG | Dimethyl Azelate                             | COX6A2  | 48     |



|    |                  |         |         |
|----|------------------|---------|---------|
| DG | Dimethyl Azelate | ADH1C   | 48      |
| DG | Dimethyl Azelate | ACADSB  | 48      |
| DG | Dimethyl Azelate | OGDH    | 48      |
| DG | Dimethyl Azelate | NPR2    | 22.373  |
| DG | Dimethyl Azelate | ABAT    | 48      |
| DG | Dimethyl Azelate | COX5B   | 48      |
| DG | Dimethyl Azelate | SCN7A   | 48      |
| DG | Dimethyl Azelate | SCN2A   | 48      |
| DG | Dimethyl Azelate | FECH    | 48      |
| DG | Dimethyl Azelate | TYR     | 48      |
| DG | Dimethyl Azelate | COX6B1  | 48      |
| DG | Dimethyl Azelate | SCN8A   | 48      |
| DG | Dimethyl Azelate | HDAC2   | 48      |
| DG | Dimethyl Azelate | SCN1A   | 48      |
| DG | Dimethyl Azelate | COX7C   | 48      |
| DG | Dimethyl Azelate | SCN5A   | 48      |
| DG | Dimethyl Azelate | COX5A   | 48      |
| DG | Dimethyl Azelate | COX4I1  | 48      |
| DG | Dimethyl Azelate | SCN9A   | 48      |
| DG | Dimethyl Azelate | FABP6   | 48      |
| DG | Dimethyl Azelate | COX7B   | 48      |
| DG | Dimethyl Azelate | COX8A   | 48      |
| DG | Guanosine        | POLA1   | 122.778 |
| DG | Guanosine        | ADORA2B | 48      |
| DG | Guanosine        | MMAB    | 23      |
| DG | Guanosine        | MMACHC  | 23      |
| DG | Guanosine        | BRCA1   | 22.373  |
| DG | Guanosine        | USP7    | 22.373  |
| DG | Guanosine        | TACR2   | 22.373  |
| DG | Guanosine        | MGMT    | 22.373  |
| DG | Guanosine        | ADORA2A | 80.882  |
| DG | Guanosine        | ADORA3  | 48      |
| DG | Guanosine        | MTRR    | 23      |
| DG | Guanosine        | MMAA    | 23      |
| DG | Guanosine        | PRKDC   | 22.373  |
| DG | Guanosine        | TCF3    | 22.373  |
| DG | Guanosine        | UHRF2   | 22.373  |
| DG | Guanosine        | HELLS   | 22.373  |
| DG | Guanosine        | POLB    | 80.882  |
| DG | Guanosine        | ADORA1  | 48      |
| DG | Guanosine        | MTR     | 23      |
| DG | Guanosine        | UHRF1   | 22.373  |
| DG | Guanosine        | KDM1A   | 22.373  |
| DG | Guanosine        | POLD1   | 22.373  |
| DG | Guanosine        | DNMT3B  | 22.373  |
| DG | Guanosine        | DNMT1   | 80.882  |
| DG | Guanosine        | TCN1    | 23      |
| DG | Guanosine        | CUBN    | 23      |
| DG | Guanosine        | DNMT3A  | 22.373  |
| DG | Guanosine        | POLG    | 22.373  |
| DG | Guanosine        | PAX5    | 22.373  |

|    |                 |          |        |
|----|-----------------|----------|--------|
| DG | Guanosine       | CTCF     | 22.373 |
| DG | Guanosine       | PNP      | 48     |
| DG | Guanosine       | MUT      | 23     |
| DG | Guanosine       | AMN      | 23     |
| DG | Guanosine       | POLE     | 22.373 |
| DG | Guanosine       | LIG4     | 22.373 |
| DG | Guanosine       | TRDMT1   | 22.373 |
| DG | Guanosine       | KDM3A    | 22.373 |
| DG | Dodecenoic Acid | RXRB     | 80.882 |
| DG | Dodecenoic Acid | NR0B1    | 80.882 |
| DG | Dodecenoic Acid | CKM      | 80.882 |
| DG | Dodecenoic Acid | PPARD    | 80.882 |
| DG | Dodecenoic Acid | PTGS2    | 80.882 |
| DG | Dodecenoic Acid | CKB      | 80.882 |
| DG | Dodecenoic Acid | APOA2    | 55.444 |
| DG | Dodecenoic Acid | IL13     | 55.444 |
| DG | Dodecenoic Acid | COL27A1  | 55.444 |
| DG | Dodecenoic Acid | RGCC     | 22.373 |
| DG | Dodecenoic Acid | ESRRG    | 22.373 |
| DG | Dodecenoic Acid | IGF1     | 22.373 |
| DG | Dodecenoic Acid | FASLG    | 22.373 |
| DG | Dodecenoic Acid | ELOVL1   | 22.373 |
| DG | Dodecenoic Acid | NUFIP2   | 22.373 |
| DG | Dodecenoic Acid | OXER1    | 22.373 |
| DG | Dodecenoic Acid | CYP4F2   | 22.373 |
| DG | Dodecenoic Acid | ALDH8A1  | 22.373 |
| DG | Dodecenoic Acid | SERPINH1 | 22.373 |
| DG | Dodecenoic Acid | ITGAV    | 22.373 |
| DG | Dodecenoic Acid | PTPN2    | 22.373 |
| DG | Dodecenoic Acid | PAX2     | 22.373 |
| DG | Dodecenoic Acid | NR1H2    | 22.373 |
| DG | Dodecenoic Acid | AGTR2    | 22.373 |
| DG | Dodecenoic Acid | ANAPC2   | 22.373 |
| DG | Dodecenoic Acid | CDC20    | 22.373 |
| DG | Dodecenoic Acid | NR1D1    | 22.373 |
| DG | Dodecenoic Acid | ELOVL7   | 22.373 |
| DG | Dodecenoic Acid | WDR77    | 22.373 |
| DG | Dodecenoic Acid | GJD4     | 22.373 |
| DG | Dodecenoic Acid | CPLX2    | 22.373 |
| DG | Dodecenoic Acid | SLC35G1  | 22.373 |
| DG | Dodecenoic Acid | DHRS9    | 22.373 |
| DG | Dodecenoic Acid | FGF2     | 22.373 |
| DG | Dodecenoic Acid | TRPA1    | 22.373 |
| DG | Dodecenoic Acid | SLC8A1   | 80.882 |
| DG | Dodecenoic Acid | TRPV1    | 80.882 |
| DG | Dodecenoic Acid | RARB     | 80.882 |
| DG | Dodecenoic Acid | SLC6A8   | 80.882 |
| DG | Dodecenoic Acid | CKMT1A   | 80.882 |
| DG | Dodecenoic Acid | GPRC5A   | 80.882 |
| DG | Dodecenoic Acid | ALDH3A1  | 55.444 |
| DG | Dodecenoic Acid | GATM     | 55.444 |

|    |                 |          |        |
|----|-----------------|----------|--------|
| DG | Dodecenoic Acid | SERPINB7 | 55.444 |
| DG | Dodecenoic Acid | IHH      | 22.373 |
| DG | Dodecenoic Acid | FNDC5    | 22.373 |
| DG | Dodecenoic Acid | AVPR1A   | 22.373 |
| DG | Dodecenoic Acid | CACNA1A  | 22.373 |
| DG | Dodecenoic Acid | MAPK9    | 22.373 |
| DG | Dodecenoic Acid | ADRA2A   | 22.373 |
| DG | Dodecenoic Acid | RPL7A    | 22.373 |
| DG | Dodecenoic Acid | PTGIS    | 22.373 |
| DG | Dodecenoic Acid | SHBG     | 22.373 |
| DG | Dodecenoic Acid | NPPC     | 22.373 |
| DG | Dodecenoic Acid | GNAT2    | 22.373 |
| DG | Dodecenoic Acid | S100A8   | 22.373 |
| DG | Dodecenoic Acid | SP1      | 22.373 |
| DG | Dodecenoic Acid | NEUROD2  | 22.373 |
| DG | Dodecenoic Acid | JAK3     | 22.373 |
| DG | Dodecenoic Acid | WNT11    | 22.373 |
| DG | Dodecenoic Acid | DNAJA3   | 22.373 |
| DG | Dodecenoic Acid | SLC3A2   | 22.373 |
| DG | Dodecenoic Acid | PAX7     | 22.373 |
| DG | Dodecenoic Acid | MECOM    | 22.373 |
| DG | Dodecenoic Acid | SNCA     | 22.373 |
| DG | Dodecenoic Acid | PPARA    | 22.373 |
| DG | Dodecenoic Acid | NOS1     | 22.373 |
| DG | Dodecenoic Acid | S100A9   | 22.373 |
| DG | Dodecenoic Acid | ABCG1    | 22.373 |
| DG | Dodecenoic Acid | GAMT     | 80.882 |
| DG | Dodecenoic Acid | RARG     | 80.882 |
| DG | Dodecenoic Acid | RXRG     | 80.882 |
| DG | Dodecenoic Acid | PTGS1    | 80.882 |
| DG | Dodecenoic Acid | ELOVL4   | 80.882 |
| DG | Dodecenoic Acid | RXRA     | 80.882 |
| DG | Dodecenoic Acid | IL1B     | 55.444 |
| DG | Dodecenoic Acid | SC5D     | 55.444 |
| DG | Dodecenoic Acid | ABCC2    | 22.373 |
| DG | Dodecenoic Acid | OPN3     | 22.373 |
| DG | Dodecenoic Acid | SLC8B1   | 22.373 |
| DG | Dodecenoic Acid | MED1     | 22.373 |
| DG | Dodecenoic Acid | PLA2R1   | 22.373 |
| DG | Dodecenoic Acid | MAP4K4   | 22.373 |
| DG | Dodecenoic Acid | OPN4     | 22.373 |
| DG | Dodecenoic Acid | PNPLA2   | 22.373 |
| DG | Dodecenoic Acid | CNST     | 22.373 |
| DG | Dodecenoic Acid | SLC8A3   | 22.373 |
| DG | Dodecenoic Acid | AR       | 22.373 |
| DG | Dodecenoic Acid | MATN1    | 22.373 |
| DG | Dodecenoic Acid | ALOX5AP  | 22.373 |
| DG | Dodecenoic Acid | SLC6A4   | 22.373 |
| DG | Dodecenoic Acid | FGF4     | 22.373 |
| DG | Dodecenoic Acid | GNB2L1   | 22.373 |
| DG | Dodecenoic Acid | TBC1D32  | 22.373 |

|    |                 |          |        |
|----|-----------------|----------|--------|
| DG | Dodecenoic Acid | RET      | 22.373 |
| DG | Dodecenoic Acid | PAXBP1   | 22.373 |
| DG | Dodecenoic Acid | SCD      | 22.373 |
| DG | Dodecenoic Acid | PLCB1    | 22.373 |
| DG | Dodecenoic Acid | ADIPOQ   | 22.373 |
| DG | Dodecenoic Acid | MYL2     | 22.373 |
| DG | Dodecenoic Acid | TRPM8    | 22.373 |
| DG | Dodecenoic Acid | VDR      | 22.373 |
| DG | Dodecenoic Acid | PRDM16   | 22.373 |
| DG | Dodecenoic Acid | CKMT1B   | 80.882 |
| DG | Dodecenoic Acid | PPARG    | 80.882 |
| DG | Dodecenoic Acid | FADS2    | 80.882 |
| DG | Dodecenoic Acid | ACSL4    | 80.882 |
| DG | Dodecenoic Acid | ALDH1A1  | 80.882 |
| DG | Dodecenoic Acid | ALDH1A2  | 80.882 |
| DG | Dodecenoic Acid | TNF      | 55.444 |
| DG | Dodecenoic Acid | SLC16A12 | 55.444 |
| DG | Dodecenoic Acid | NDRG2    | 22.373 |
| DG | Dodecenoic Acid | HOPX     | 22.373 |
| DG | Dodecenoic Acid | NR1H3    | 22.373 |
| DG | Dodecenoic Acid | FMR1     | 22.373 |
| DG | Dodecenoic Acid | ITGB3    | 22.373 |
| DG | Dodecenoic Acid | ANXA13   | 22.373 |
| DG | Dodecenoic Acid | STX3     | 22.373 |
| DG | Dodecenoic Acid | CAPN3    | 22.373 |
| DG | Dodecenoic Acid | GDF5     | 22.373 |
| DG | Dodecenoic Acid | FGF10    | 22.373 |
| DG | Dodecenoic Acid | HEG1     | 22.373 |
| DG | Dodecenoic Acid | MYOD1    | 22.373 |
| DG | Dodecenoic Acid | TCF3     | 22.373 |
| DG | Dodecenoic Acid | SP3      | 22.373 |
| DG | Dodecenoic Acid | SCD5     | 22.373 |
| DG | Dodecenoic Acid | GATA3    | 22.373 |
| DG | Dodecenoic Acid | JUNB     | 22.373 |
| DG | Dodecenoic Acid | KCNA5    | 22.373 |
| DG | Dodecenoic Acid | MEX3C    | 22.373 |
| DG | Dodecenoic Acid | ABCA1    | 22.373 |
| DG | Dodecenoic Acid | ABHD5    | 22.373 |
| DG | Dodecenoic Acid | RYR2     | 22.373 |
| DG | Dodecenoic Acid | ALOX15   | 22.373 |
| DG | Dodecenoic Acid | PAWR     | 22.373 |
| DG | Dodecenoic Acid | FABP3    | 22.373 |
| DG | Dodecenoic Acid | CYR61    | 22.373 |
| DG | Dodecenoic Acid | RARRES1  | 80.882 |
| DG | Dodecenoic Acid | FFAR1    | 80.882 |
| DG | Dodecenoic Acid | FADS1    | 80.882 |
| DG | Dodecenoic Acid | CKMT2    | 80.882 |
| DG | Dodecenoic Acid | RARA     | 80.882 |
| DG | Dodecenoic Acid | ACSL3    | 80.882 |
| DG | Dodecenoic Acid | SLC9A1   | 55.444 |
| DG | Dodecenoic Acid | LPCAT1   | 55.444 |

|    |                            |          |        |
|----|----------------------------|----------|--------|
| DG | Dodecenoic Acid            | NAMPT    | 22.373 |
| DG | Dodecenoic Acid            | LARP4B   | 22.373 |
| DG | Dodecenoic Acid            | OSBPL8   | 22.373 |
| DG | Dodecenoic Acid            | ELOVL3   | 22.373 |
| DG | Dodecenoic Acid            | METRNL   | 22.373 |
| DG | Dodecenoic Acid            | FOXA1    | 22.373 |
| DG | Dodecenoic Acid            | SOX15    | 22.373 |
| DG | Dodecenoic Acid            | EIF2AK1  | 22.373 |
| DG | Dodecenoic Acid            | SLC8A2   | 22.373 |
| DG | Dodecenoic Acid            | ABCF1    | 22.373 |
| DG | Dodecenoic Acid            | PPARGC1B | 22.373 |
| DG | Dodecenoic Acid            | ELOVL6   | 22.373 |
| DG | Dodecenoic Acid            | AVP      | 22.373 |
| DG | Dodecenoic Acid            | BDKRB2   | 22.373 |
| DG | Dodecenoic Acid            | INS      | 22.373 |
| DG | Dodecenoic Acid            | ZNF536   | 22.373 |
| DG | Dodecenoic Acid            | ALOX15B  | 22.373 |
| DG | Dodecenoic Acid            | COL1A1   | 22.373 |
| DG | Dodecenoic Acid            | NOTCH1   | 22.373 |
| DG | Dodecenoic Acid            | NAPRT    | 22.373 |
| DG | Dodecenoic Acid            | TSPO     | 22.373 |
| DG | Dodecenoic Acid            | NODAL    | 22.373 |
| DG | Dodecenoic Acid            | ANXA1    | 22.373 |
| DG | Dodecenoic Acid            | SOX9     | 22.373 |
| DG | Dodecenoic Acid            | CYP1A1   | 22.373 |
| DG | Dodecenoic Acid            | CCM2L    | 22.373 |
| DG | Dimethyl-Beta-Propiothetin | SCN11A   | 80.882 |
| DG | Dimethyl-Beta-Propiothetin | SCN1A    | 80.882 |
| DG | Dimethyl-Beta-Propiothetin | SCN3A    | 80.882 |
| DG | Dimethyl-Beta-Propiothetin | SCN7A    | 80.882 |
| DG | Dimethyl-Beta-Propiothetin | SLC13A3  | 80.882 |
| DG | Dimethyl-Beta-Propiothetin | BBOX1    | 80.882 |
| DG | Dimethyl-Beta-Propiothetin | OXCT1    | 80.882 |
| DG | Dimethyl-Beta-Propiothetin | SDHC     | 80.882 |
| DG | Dimethyl-Beta-Propiothetin | P3H2     | 80.882 |
| DG | Dimethyl-Beta-Propiothetin | HDAC2    | 80.882 |
| DG | Dimethyl-Beta-Propiothetin | CRTAP    | 55.444 |
| DG | Dimethyl-Beta-Propiothetin | SDHAF2   | 55.444 |
| DG | Dimethyl-Beta-Propiothetin | HIF1AN   | 55.444 |
| DG | Dimethyl-Beta-Propiothetin | GPD1L    | 22.373 |
| DG | Dimethyl-Beta-Propiothetin | SUGCT    | 22.373 |
| DG | Dimethyl-Beta-Propiothetin | COLGALT2 | 22.373 |
| DG | Dimethyl-Beta-Propiothetin | SUOX     | 22.373 |
| DG | Dimethyl-Beta-Propiothetin | CCL5     | 22.373 |
| DG | Dimethyl-Beta-Propiothetin | ALDH9A1  | 22.373 |
| DG | Dimethyl-Beta-Propiothetin | CYP11A1  | 22.373 |
| DG | Dimethyl-Beta-Propiothetin | ACAT1    | 22.373 |
| DG | Dimethyl-Beta-Propiothetin | PNLIPRP2 | 22.373 |
| DG | Dimethyl-Beta-Propiothetin | 8-Mar    | 22.373 |
| DG | Dimethyl-Beta-Propiothetin | DDC      | 22.373 |
| DG | Dimethyl-Beta-Propiothetin | BCKDHB   | 22.373 |

|    |                            |          |        |
|----|----------------------------|----------|--------|
| DG | Dimethyl-Beta-Propiothetin | UROD     | 22.373 |
| DG | Dimethyl-Beta-Propiothetin | SLC38A7  | 22.373 |
| DG | Dimethyl-Beta-Propiothetin | PF4      | 22.373 |
| DG | Dimethyl-Beta-Propiothetin | MYO5A    | 22.373 |
| DG | Dimethyl-Beta-Propiothetin | EGLN3    | 22.373 |
| DG | Dimethyl-Beta-Propiothetin | NPPA     | 22.373 |
| DG | Dimethyl-Beta-Propiothetin | ARHGEF2  | 22.373 |
| DG | Dimethyl-Beta-Propiothetin | HSD17B8  | 22.373 |
| DG | Dimethyl-Beta-Propiothetin | RYR2     | 22.373 |
| DG | Dimethyl-Beta-Propiothetin | GJA5     | 22.373 |
| DG | Dimethyl-Beta-Propiothetin | GNAS     | 22.373 |
| DG | Dimethyl-Beta-Propiothetin | SULT2A1  | 22.373 |
| DG | Dimethyl-Beta-Propiothetin | SCN2B    | 80.882 |
| DG | Dimethyl-Beta-Propiothetin | SCN3B    | 80.882 |
| DG | Dimethyl-Beta-Propiothetin | SLC25A10 | 80.882 |
| DG | Dimethyl-Beta-Propiothetin | PLOD1    | 80.882 |
| DG | Dimethyl-Beta-Propiothetin | AKR1D1   | 80.882 |
| DG | Dimethyl-Beta-Propiothetin | SDHB     | 80.882 |
| DG | Dimethyl-Beta-Propiothetin | SCN4A    | 80.882 |
| DG | Dimethyl-Beta-Propiothetin | SRD5A2   | 80.882 |
| DG | Dimethyl-Beta-Propiothetin | SDHA     | 80.882 |
| DG | Dimethyl-Beta-Propiothetin | SDHD     | 80.882 |
| DG | Dimethyl-Beta-Propiothetin | SLIT2    | 55.444 |
| DG | Dimethyl-Beta-Propiothetin | SLC1A3   | 55.444 |
| DG | Dimethyl-Beta-Propiothetin | UROS     | 55.444 |
| DG | Dimethyl-Beta-Propiothetin | SRD5A1   | 22.373 |
| DG | Dimethyl-Beta-Propiothetin | ACSS2    | 22.373 |
| DG | Dimethyl-Beta-Propiothetin | SIX4     | 22.373 |
| DG | Dimethyl-Beta-Propiothetin | CCL2     | 22.373 |
| DG | Dimethyl-Beta-Propiothetin | ANK2     | 22.373 |
| DG | Dimethyl-Beta-Propiothetin | TH       | 22.373 |
| DG | Dimethyl-Beta-Propiothetin | DHODH    | 22.373 |
| DG | Dimethyl-Beta-Propiothetin | GALC     | 22.373 |
| DG | Dimethyl-Beta-Propiothetin | CYP39A1  | 22.373 |
| DG | Dimethyl-Beta-Propiothetin | STIM1    | 22.373 |
| DG | Dimethyl-Beta-Propiothetin | DHTKD1   | 22.373 |
| DG | Dimethyl-Beta-Propiothetin | KCNE5    | 22.373 |
| DG | Dimethyl-Beta-Propiothetin | UGT8     | 22.373 |
| DG | Dimethyl-Beta-Propiothetin | ACSS1    | 22.373 |
| DG | Dimethyl-Beta-Propiothetin | CRACR2A  | 22.373 |
| DG | Dimethyl-Beta-Propiothetin | ILVBL    | 22.373 |
| DG | Dimethyl-Beta-Propiothetin | OGDHL    | 22.373 |
| DG | Dimethyl-Beta-Propiothetin | ACADM    | 22.373 |
| DG | Dimethyl-Beta-Propiothetin | EGLN1    | 22.373 |
| DG | Dimethyl-Beta-Propiothetin | CTNNB1   | 22.373 |
| DG | Dimethyl-Beta-Propiothetin | HAP1     | 22.373 |
| DG | Dimethyl-Beta-Propiothetin | DHRS9    | 22.373 |
| DG | Dimethyl-Beta-Propiothetin | SLC25A13 | 22.373 |
| DG | Dimethyl-Beta-Propiothetin | NFX1     | 22.373 |
| DG | Dimethyl-Beta-Propiothetin | SUCLG2   | 80.882 |
| DG | Dimethyl-Beta-Propiothetin | SLC13A1  | 80.882 |

|    |                            |          |        |
|----|----------------------------|----------|--------|
| DG | Dimethyl-Beta-Propiothetin | P3H3     | 80.882 |
| DG | Dimethyl-Beta-Propiothetin | SCN5A    | 80.882 |
| DG | Dimethyl-Beta-Propiothetin | ALDH5A1  | 80.882 |
| DG | Dimethyl-Beta-Propiothetin | HDAC9    | 80.882 |
| DG | Dimethyl-Beta-Propiothetin | SCN4B    | 80.882 |
| DG | Dimethyl-Beta-Propiothetin | ACADSB   | 80.882 |
| DG | Dimethyl-Beta-Propiothetin | OGDH     | 80.882 |
| DG | Dimethyl-Beta-Propiothetin | P3H1     | 80.882 |
| DG | Dimethyl-Beta-Propiothetin | ACO2     | 55.444 |
| DG | Dimethyl-Beta-Propiothetin | SALL1    | 55.444 |
| DG | Dimethyl-Beta-Propiothetin | SLC13A5  | 55.444 |
| DG | Dimethyl-Beta-Propiothetin | FBXO45   | 22.373 |
| DG | Dimethyl-Beta-Propiothetin | ARV1     | 22.373 |
| DG | Dimethyl-Beta-Propiothetin | MRPS36   | 22.373 |
| DG | Dimethyl-Beta-Propiothetin | BCKDK    | 22.373 |
| DG | Dimethyl-Beta-Propiothetin | HSD17B2  | 22.373 |
| DG | Dimethyl-Beta-Propiothetin | EPO      | 22.373 |
| DG | Dimethyl-Beta-Propiothetin | CLN3     | 22.373 |
| DG | Dimethyl-Beta-Propiothetin | PLCG2    | 22.373 |
| DG | Dimethyl-Beta-Propiothetin | BCKDHA   | 22.373 |
| DG | Dimethyl-Beta-Propiothetin | GAL3ST1  | 22.373 |
| DG | Dimethyl-Beta-Propiothetin | NEDD4L   | 22.373 |
| DG | Dimethyl-Beta-Propiothetin | SRD5A3   | 22.373 |
| DG | Dimethyl-Beta-Propiothetin | ETHE1    | 22.373 |
| DG | Dimethyl-Beta-Propiothetin | CYP4B1   | 22.373 |
| DG | Dimethyl-Beta-Propiothetin | HSD17B1  | 22.373 |
| DG | Dimethyl-Beta-Propiothetin | CAV3     | 22.373 |
| DG | Dimethyl-Beta-Propiothetin | KCNA5    | 22.373 |
| DG | Dimethyl-Beta-Propiothetin | SQRDL    | 22.373 |
| DG | Dimethyl-Beta-Propiothetin | ETFDH    | 22.373 |
| DG | Dimethyl-Beta-Propiothetin | P4HA3    | 22.373 |
| DG | Dimethyl-Beta-Propiothetin | PCSK9    | 22.373 |
| DG | Dimethyl-Beta-Propiothetin | GPR143   | 22.373 |
| DG | Dimethyl-Beta-Propiothetin | SFXN5    | 22.373 |
| DG | Dimethyl-Beta-Propiothetin | DBT      | 22.373 |
| DG | Dimethyl-Beta-Propiothetin | SLC13A2  | 80.882 |
| DG | Dimethyl-Beta-Propiothetin | SUCLG1   | 80.882 |
| DG | Dimethyl-Beta-Propiothetin | OXCT2    | 80.882 |
| DG | Dimethyl-Beta-Propiothetin | SCN10A   | 80.882 |
| DG | Dimethyl-Beta-Propiothetin | SCN2A    | 80.882 |
| DG | Dimethyl-Beta-Propiothetin | TYR      | 80.882 |
| DG | Dimethyl-Beta-Propiothetin | PLOD3    | 80.882 |
| DG | Dimethyl-Beta-Propiothetin | SCN8A    | 80.882 |
| DG | Dimethyl-Beta-Propiothetin | P4HA2    | 80.882 |
| DG | Dimethyl-Beta-Propiothetin | DCT      | 55.444 |
| DG | Dimethyl-Beta-Propiothetin | JMJD6    | 55.444 |
| DG | Dimethyl-Beta-Propiothetin | HSD17B11 | 55.444 |
| DG | Dimethyl-Beta-Propiothetin | P4HB     | 55.444 |
| DG | Dimethyl-Beta-Propiothetin | SIRT1    | 22.373 |
| DG | Dimethyl-Beta-Propiothetin | SIX1     | 22.373 |
| DG | Dimethyl-Beta-Propiothetin | OSBPL8   | 22.373 |

|    |                            |          |        |
|----|----------------------------|----------|--------|
| DG | Dimethyl-Beta-Propiothetin | UBE2B    | 22.373 |
| DG | Dimethyl-Beta-Propiothetin | STIM2    | 22.373 |
| DG | Dimethyl-Beta-Propiothetin | COLGALT1 | 22.373 |
| DG | Dimethyl-Beta-Propiothetin | ARID1A   | 22.373 |
| DG | Dimethyl-Beta-Propiothetin | ACOT4    | 22.373 |
| DG | Dimethyl-Beta-Propiothetin | SLC25A12 | 22.373 |
| DG | Dimethyl-Beta-Propiothetin | CDH11    | 22.373 |
| DG | Dimethyl-Beta-Propiothetin | BDKRB2   | 22.373 |
| DG | Dimethyl-Beta-Propiothetin | SMAD7    | 22.373 |
| DG | Dimethyl-Beta-Propiothetin | WNT10B   | 22.373 |
| DG | Dimethyl-Beta-Propiothetin | STAR     | 22.373 |
| DG | Dimethyl-Beta-Propiothetin | CAMK2D   | 22.373 |
| DG | Dimethyl-Beta-Propiothetin | HTT      | 22.373 |
| DG | Dimethyl-Beta-Propiothetin | TST      | 22.373 |
| DG | Dimethyl-Beta-Propiothetin | TMEM110  | 22.373 |
| DG | Dimethyl-Beta-Propiothetin | EPHA4    | 22.373 |
| DG | Dimethyl-Beta-Propiothetin | EDA      | 22.373 |
| DG | Dimethyl-Beta-Propiothetin | KCNQ1    | 22.373 |
| DG | Dimethyl-Beta-Propiothetin | UGT1A1   | 22.373 |
| DG | Dimethyl-Beta-Propiothetin | PLOD2    | 22.373 |
| DG | Dimethyl-Beta-Propiothetin | SLC25A1  | 22.373 |
| DG | Dimethyl-Beta-Propiothetin | ABAT     | 80.882 |
| DG | Dimethyl-Beta-Propiothetin | HSD17B6  | 80.882 |
| DG | Dimethyl-Beta-Propiothetin | TMLHE    | 80.882 |
| DG | Dimethyl-Beta-Propiothetin | SUCNR1   | 80.882 |
| DG | Dimethyl-Beta-Propiothetin | ASPH     | 80.882 |
| DG | Dimethyl-Beta-Propiothetin | SCN9A    | 80.882 |
| DG | Dimethyl-Beta-Propiothetin | P4HA1    | 80.882 |
| DG | Dimethyl-Beta-Propiothetin | SCN1B    | 80.882 |
| DG | Dimethyl-Beta-Propiothetin | SUCLA2   | 80.882 |
| DG | Dimethyl-Beta-Propiothetin | AKR1C3   | 55.444 |
| DG | Dimethyl-Beta-Propiothetin | SLC13A4  | 55.444 |
| DG | Dimethyl-Beta-Propiothetin | TYRP1    | 55.444 |
| DG | Dimethyl-Beta-Propiothetin | HDAC1    | 23     |
| DG | Dimethyl-Beta-Propiothetin | SHMT1    | 22.373 |
| DG | Dimethyl-Beta-Propiothetin | BDH1     | 22.373 |
| DG | Dimethyl-Beta-Propiothetin | SPI1     | 22.373 |
| DG | Dimethyl-Beta-Propiothetin | CYP1A2   | 22.373 |
| DG | Dimethyl-Beta-Propiothetin | PKD2     | 22.373 |
| DG | Dimethyl-Beta-Propiothetin | NEDD4    | 22.373 |
| DG | Dimethyl-Beta-Propiothetin | EGLN2    | 22.373 |
| DG | Dimethyl-Beta-Propiothetin | PHGDH    | 22.373 |
| DG | Dimethyl-Beta-Propiothetin | YBX3     | 22.373 |
| DG | Dimethyl-Beta-Propiothetin | CACNA1D  | 22.373 |
| DG | Dimethyl-Beta-Propiothetin | PRPH     | 22.373 |
| DG | Dimethyl-Beta-Propiothetin | PRDM8    | 22.373 |
| DG | Dimethyl-Beta-Propiothetin | OGFOD1   | 22.373 |
| DG | Dimethyl-Beta-Propiothetin | DLST     | 22.373 |
| DG | Dimethyl-Beta-Propiothetin | AP3D1    | 22.373 |
| DG | Dimethyl-Beta-Propiothetin | IL10     | 22.373 |
| DG | Dimethyl-Beta-Propiothetin | SLC1A6   | 22.373 |



|    |                            |         |        |
|----|----------------------------|---------|--------|
| DG | Dimethyl-Beta-Propiothetin | CDC42   | 22.373 |
| DG | Dimethyl-Beta-Propiothetin | OCA2    | 22.373 |
| DG | Dimethyl-Beta-Propiothetin | HACL1   | 22.373 |
| DG | Dimethyl-Beta-Propiothetin | CASQ2   | 22.373 |
| DG | Dimethyl-Beta-Propiothetin | DLD     | 22.373 |
| DG | Dimethyl-Beta-Propiothetin | CYP1A1  | 22.373 |
| DG | 4-Ethylresorcinol          | GABRA2  | 80.882 |
| DG | 4-Ethylresorcinol          | TNF     | 80.882 |
| DG | 4-Ethylresorcinol          | GABRP   | 80.882 |
| DG | 4-Ethylresorcinol          | GABRQ   | 80.882 |
| DG | 4-Ethylresorcinol          | PDE4B   | 80.882 |
| DG | 4-Ethylresorcinol          | COLQ    | 55.444 |
| DG | 4-Ethylresorcinol          | SLC6A4  | 48     |
| DG | 4-Ethylresorcinol          | DRD3    | 48     |
| DG | 4-Ethylresorcinol          | SCN3A   | 23     |
| DG | 4-Ethylresorcinol          | SEMA4D  | 22.373 |
| DG | 4-Ethylresorcinol          | MIF     | 22.373 |
| DG | 4-Ethylresorcinol          | FASLG   | 22.373 |
| DG | 4-Ethylresorcinol          | CRP     | 22.373 |
| DG | 4-Ethylresorcinol          | IL1B    | 22.373 |
| DG | 4-Ethylresorcinol          | SLC44A4 | 22.373 |
| DG | 4-Ethylresorcinol          | ANGPT1  | 22.373 |
| DG | 4-Ethylresorcinol          | PLN     | 22.373 |
| DG | 4-Ethylresorcinol          | HRC     | 22.373 |
| DG | 4-Ethylresorcinol          | ADIRF   | 22.373 |
| DG | 4-Ethylresorcinol          | IL10    | 22.373 |
| DG | 4-Ethylresorcinol          | FNTA    | 22.373 |
| DG | 4-Ethylresorcinol          | AHCY    | 22.373 |
| DG | 4-Ethylresorcinol          | IKBKB   | 22.373 |
| DG | 4-Ethylresorcinol          | CHDH    | 22.373 |
| DG | 4-Ethylresorcinol          | HCN2    | 22.373 |
| DG | 4-Ethylresorcinol          | GABRD   | 80.882 |
| DG | 4-Ethylresorcinol          | GABRE   | 80.882 |
| DG | 4-Ethylresorcinol          | GABRA4  | 80.882 |
| DG | 4-Ethylresorcinol          | GABRB3  | 80.882 |
| DG | 4-Ethylresorcinol          | BCHE    | 80.882 |
| DG | 4-Ethylresorcinol          | LTA     | 55.444 |
| DG | 4-Ethylresorcinol          | DRD4    | 48     |
| DG | 4-Ethylresorcinol          | DRD5    | 48     |
| DG | 4-Ethylresorcinol          | HMGA2   | 22.373 |
| DG | 4-Ethylresorcinol          | NRG1    | 22.373 |
| DG | 4-Ethylresorcinol          | DMGDH   | 22.373 |
| DG | 4-Ethylresorcinol          | LGALS3  | 22.373 |
| DG | 4-Ethylresorcinol          | TLR3    | 22.373 |
| DG | 4-Ethylresorcinol          | SHH     | 22.373 |
| DG | 4-Ethylresorcinol          | ADORA2B | 22.373 |
| DG | 4-Ethylresorcinol          | AURKA   | 22.373 |
| DG | 4-Ethylresorcinol          | DNM3    | 22.373 |
| DG | 4-Ethylresorcinol          | TGFB2   | 22.373 |
| DG | 4-Ethylresorcinol          | BDKRB2  | 22.373 |
| DG | 4-Ethylresorcinol          | CDH8    | 22.373 |

|    |                   |         |        |
|----|-------------------|---------|--------|
| DG | 4-Ethylresorcinol | HPN     | 22.373 |
| DG | 4-Ethylresorcinol | APOA1   | 22.373 |
| DG | 4-Ethylresorcinol | IDO1    | 22.373 |
| DG | 4-Ethylresorcinol | SOX9    | 22.373 |
| DG | 4-Ethylresorcinol | PDE3A   | 80.882 |
| DG | 4-Ethylresorcinol | SCN2A   | 80.882 |
| DG | 4-Ethylresorcinol | GABRB2  | 80.882 |
| DG | 4-Ethylresorcinol | GABRA5  | 80.882 |
| DG | 4-Ethylresorcinol | GABRG2  | 80.882 |
| DG | 4-Ethylresorcinol | RXRA    | 55.444 |
| DG | 4-Ethylresorcinol | HTR7    | 48     |
| DG | 4-Ethylresorcinol | DRD1    | 48     |
| DG | 4-Ethylresorcinol | PDE5A   | 22.373 |
| DG | 4-Ethylresorcinol | CD74    | 22.373 |
| DG | 4-Ethylresorcinol | NKX3-1  | 22.373 |
| DG | 4-Ethylresorcinol | KLF4    | 22.373 |
| DG | 4-Ethylresorcinol | EPO     | 22.373 |
| DG | 4-Ethylresorcinol | RIPK1   | 22.373 |
| DG | 4-Ethylresorcinol | ALDH7A1 | 22.373 |
| DG | 4-Ethylresorcinol | WNT2    | 22.373 |
| DG | 4-Ethylresorcinol | FCER2   | 22.373 |
| DG | 4-Ethylresorcinol | RAPGEF2 | 22.373 |
| DG | 4-Ethylresorcinol | ASCL1   | 22.373 |
| DG | 4-Ethylresorcinol | NCOA1   | 22.373 |
| DG | 4-Ethylresorcinol | KMT2A   | 22.373 |
| DG | 4-Ethylresorcinol | ARHGEF2 | 22.373 |
| DG | 4-Ethylresorcinol | CTNNB1  | 22.373 |
| DG | 4-Ethylresorcinol | CAMK2G  | 22.373 |
| DG | 4-Ethylresorcinol | GABRB1  | 80.882 |
| DG | 4-Ethylresorcinol | GABRA3  | 80.882 |
| DG | 4-Ethylresorcinol | ACHE    | 80.882 |
| DG | 4-Ethylresorcinol | GABRA6  | 80.882 |
| DG | 4-Ethylresorcinol | PDE3B   | 55.444 |
| DG | 4-Ethylresorcinol | SLC6A3  | 48     |
| DG | 4-Ethylresorcinol | HTR1A   | 48     |
| DG | 4-Ethylresorcinol | SLC6A2  | 48     |
| DG | 4-Ethylresorcinol | APOA2   | 22.373 |
| DG | 4-Ethylresorcinol | HPX     | 22.373 |
| DG | 4-Ethylresorcinol | SIX3    | 22.373 |
| DG | 4-Ethylresorcinol | LILRB1  | 22.373 |
| DG | 4-Ethylresorcinol | MAP2K5  | 22.373 |
| DG | 4-Ethylresorcinol | FGF10   | 22.373 |
| DG | 4-Ethylresorcinol | FADD    | 22.373 |
| DG | 4-Ethylresorcinol | YBX3    | 22.373 |
| DG | 4-Ethylresorcinol | WNT2B   | 22.373 |
| DG | 4-Ethylresorcinol | TIRAP   | 22.373 |
| DG | 4-Ethylresorcinol | ENPP6   | 22.373 |
| DG | 4-Ethylresorcinol | IL6     | 22.373 |
| DG | 4-Ethylresorcinol | NOD2    | 22.373 |
| DG | 4-Ethylresorcinol | IL4     | 22.373 |
| DG | 4-Ethylresorcinol | CHKA    | 22.373 |

|    |                   |         |        |
|----|-------------------|---------|--------|
| DG | 4-Ethylresorcinol | FAS     | 22.373 |
| DG | 4-Ethylresorcinol | GABRG3  | 80.882 |
| DG | 4-Ethylresorcinol | GABRG1  | 80.882 |
| DG | 4-Ethylresorcinol | SCN4A   | 80.882 |
| DG | 4-Ethylresorcinol | GABRA1  | 80.882 |
| DG | 4-Ethylresorcinol | PDE4D   | 55.444 |
| DG | 4-Ethylresorcinol | DRD2    | 48     |
| DG | 4-Ethylresorcinol | DBH     | 48     |
| DG | 4-Ethylresorcinol | SCN1A   | 23     |
| DG | 4-Ethylresorcinol | SLC5A7  | 22.373 |
| DG | 4-Ethylresorcinol | SIRT2   | 22.373 |
| DG | 4-Ethylresorcinol | HCN4    | 22.373 |
| DG | 4-Ethylresorcinol | NCKAP1L | 22.373 |
| DG | 4-Ethylresorcinol | EIF2AK1 | 22.373 |
| DG | 4-Ethylresorcinol | PRSS12  | 22.373 |
| DG | 4-Ethylresorcinol | FGFR2   | 22.373 |
| DG | 4-Ethylresorcinol | IL1RN   | 22.373 |
| DG | 4-Ethylresorcinol | IFNG    | 22.373 |
| DG | 4-Ethylresorcinol | ROCK2   | 22.373 |
| DG | 4-Ethylresorcinol | CAMK2D  | 22.373 |
| DG | 4-Ethylresorcinol | ROCK1   | 22.373 |
| DG | 4-Ethylresorcinol | BMP4    | 22.373 |
| DG | 4-Ethylresorcinol | AGRN    | 22.373 |
| DG | 4-Ethylresorcinol | PDE2A   | 22.373 |
| DG | 4-Ethylresorcinol | GRIN1   | 22.373 |
| DG | Dimethyl Sebacate | NPR1    | 80.882 |
| DG | Dimethyl Sebacate | ESRRG   | 48     |
| DG | Dimethyl Sebacate | COX1    | 48     |
| DG | Dimethyl Sebacate | SCN10A  | 48     |
| DG | Dimethyl Sebacate | COX3    | 48     |
| DG | Dimethyl Sebacate | HDAC9   | 48     |
| DG | Dimethyl Sebacate | SCN4A   | 48     |
| DG | Dimethyl Sebacate | CES1    | 48     |
| DG | Dimethyl Sebacate | SCN1B   | 48     |
| DG | Dimethyl Sebacate | NR1H4   | 48     |
| DG | Dimethyl Sebacate | SCN11A  | 48     |
| DG | Dimethyl Sebacate | SCN3B   | 48     |
| DG | Dimethyl Sebacate | SCN3A   | 48     |
| DG | Dimethyl Sebacate | AKR1D1  | 48     |
| DG | Dimethyl Sebacate | AR      | 48     |
| DG | Dimethyl Sebacate | PLA2G1B | 48     |
| DG | Dimethyl Sebacate | SCN4B   | 48     |
| DG | Dimethyl Sebacate | SRD5A2  | 48     |
| DG | Dimethyl Sebacate | COX2    | 48     |
| DG | Dimethyl Sebacate | NPR3    | 22.373 |
| DG | Dimethyl Sebacate | SCN2B   | 48     |
| DG | Dimethyl Sebacate | COX6C   | 48     |
| DG | Dimethyl Sebacate | AKR1C2  | 48     |
| DG | Dimethyl Sebacate | ALDH5A1 | 48     |
| DG | Dimethyl Sebacate | COX7A1  | 48     |
| DG | Dimethyl Sebacate | COX6A2  | 48     |

|    |                   |         |         |
|----|-------------------|---------|---------|
| DG | Dimethyl Sebacate | ADH1C   | 48      |
| DG | Dimethyl Sebacate | ACADSB  | 48      |
| DG | Dimethyl Sebacate | OGDH    | 48      |
| DG | Dimethyl Sebacate | NPR2    | 22.373  |
| DG | Dimethyl Sebacate | ABAT    | 48      |
| DG | Dimethyl Sebacate | COX5B   | 48      |
| DG | Dimethyl Sebacate | SCN7A   | 48      |
| DG | Dimethyl Sebacate | SCN2A   | 48      |
| DG | Dimethyl Sebacate | FECH    | 48      |
| DG | Dimethyl Sebacate | TYR     | 48      |
| DG | Dimethyl Sebacate | COX6B1  | 48      |
| DG | Dimethyl Sebacate | SCN8A   | 48      |
| DG | Dimethyl Sebacate | HDAC2   | 48      |
| DG | Dimethyl Sebacate | SCN1A   | 48      |
| DG | Dimethyl Sebacate | COX7C   | 48      |
| DG | Dimethyl Sebacate | SCN5A   | 48      |
| DG | Dimethyl Sebacate | COX5A   | 48      |
| DG | Dimethyl Sebacate | COX4I1  | 48      |
| DG | Dimethyl Sebacate | SCN9A   | 48      |
| DG | Dimethyl Sebacate | FABP6   | 48      |
| DG | Dimethyl Sebacate | COX7B   | 48      |
| DG | Dimethyl Sebacate | COX8A   | 48      |
| DG | Phenylacetic Acid | PLAT    | 122.778 |
| DG | Phenylacetic Acid | CFTR    | 122.778 |
| DG | Phenylacetic Acid | HCAR3   | 80.882  |
| DG | Phenylacetic Acid | IL13    | 55.444  |
| DG | Phenylacetic Acid | CXCR1   | 48      |
| DG | Phenylacetic Acid | SLC4A7  | 22.373  |
| DG | Phenylacetic Acid | NGFR    | 22.373  |
| DG | Phenylacetic Acid | SIRT2   | 22.373  |
| DG | Phenylacetic Acid | AVPR1A  | 22.373  |
| DG | Phenylacetic Acid | FASLG   | 22.373  |
| DG | Phenylacetic Acid | MAPK9   | 22.373  |
| DG | Phenylacetic Acid | OXER1   | 22.373  |
| DG | Phenylacetic Acid | RUNX1   | 22.373  |
| DG | Phenylacetic Acid | HSH2D   | 22.373  |
| DG | Phenylacetic Acid | CNTF    | 22.373  |
| DG | Phenylacetic Acid | SRC     | 22.373  |
| DG | Phenylacetic Acid | SLC6A4  | 22.373  |
| DG | Phenylacetic Acid | INS     | 22.373  |
| DG | Phenylacetic Acid | WNT11   | 22.373  |
| DG | Phenylacetic Acid | SLC26A3 | 22.373  |
| DG | Phenylacetic Acid | IL6     | 22.373  |
| DG | Phenylacetic Acid | NR1D1   | 22.373  |
| DG | Phenylacetic Acid | SLC34A1 | 22.373  |
| DG | Phenylacetic Acid | CPLX2   | 22.373  |
| DG | Phenylacetic Acid | MYOG    | 22.373  |
| DG | Phenylacetic Acid | SEC61B  | 22.373  |
| DG | Phenylacetic Acid | CCM2L   | 22.373  |
| DG | Phenylacetic Acid | THBD    | 122.778 |
| DG | Phenylacetic Acid | PTGS1   | 122.778 |

|    |                   |           |         |
|----|-------------------|-----------|---------|
| DG | Phenylacetic Acid | NNMT      | 80.882  |
| DG | Phenylacetic Acid | C1QTNF3   | 55.444  |
| DG | Phenylacetic Acid | PDXP      | 22.373  |
| DG | Phenylacetic Acid | NOX1      | 22.373  |
| DG | Phenylacetic Acid | FNDC5     | 22.373  |
| DG | Phenylacetic Acid | OSBPL8    | 22.373  |
| DG | Phenylacetic Acid | DNAJC3    | 22.373  |
| DG | Phenylacetic Acid | ITGB3     | 22.373  |
| DG | Phenylacetic Acid | ADAMTS9   | 22.373  |
| DG | Phenylacetic Acid | PNPLA2    | 22.373  |
| DG | Phenylacetic Acid | CLN3      | 22.373  |
| DG | Phenylacetic Acid | ITGAV     | 22.373  |
| DG | Phenylacetic Acid | PTPN2     | 22.373  |
| DG | Phenylacetic Acid | AVP       | 22.373  |
| DG | Phenylacetic Acid | TCAF2     | 22.373  |
| DG | Phenylacetic Acid | NGF       | 22.373  |
| DG | Phenylacetic Acid | CDKN2A    | 22.373  |
| DG | Phenylacetic Acid | CDC20     | 22.373  |
| DG | Phenylacetic Acid | RET       | 22.373  |
| DG | Phenylacetic Acid | IFI6      | 22.373  |
| DG | Phenylacetic Acid | MECOM     | 22.373  |
| DG | Phenylacetic Acid | PPARA     | 22.373  |
| DG | Phenylacetic Acid | S100A9    | 22.373  |
| DG | Phenylacetic Acid | NR1H4     | 22.373  |
| DG | Phenylacetic Acid | PPARG     | 122.778 |
| DG | Phenylacetic Acid | PTGS2     | 122.778 |
| DG | Phenylacetic Acid | APOA2     | 55.444  |
| DG | Phenylacetic Acid | KCNE2     | 55.444  |
| DG | Phenylacetic Acid | NDRG2     | 22.373  |
| DG | Phenylacetic Acid | NAMPT     | 22.373  |
| DG | Phenylacetic Acid | RAB11FIP5 | 22.373  |
| DG | Phenylacetic Acid | CA7       | 22.373  |
| DG | Phenylacetic Acid | ANO9      | 22.373  |
| DG | Phenylacetic Acid | TP53      | 22.373  |
| DG | Phenylacetic Acid | SLC26A6   | 22.373  |
| DG | Phenylacetic Acid | MYF6      | 22.373  |
| DG | Phenylacetic Acid | PNP       | 22.373  |
| DG | Phenylacetic Acid | SCRIB     | 22.373  |
| DG | Phenylacetic Acid | S100A8    | 22.373  |
| DG | Phenylacetic Acid | BAX       | 22.373  |
| DG | Phenylacetic Acid | BDKRB2    | 22.373  |
| DG | Phenylacetic Acid | RAB11FIP3 | 22.373  |
| DG | Phenylacetic Acid | ALOX15B   | 22.373  |
| DG | Phenylacetic Acid | NUDT12    | 22.373  |
| DG | Phenylacetic Acid | BCL2L1    | 22.373  |
| DG | Phenylacetic Acid | ABCA1     | 22.373  |
| DG | Phenylacetic Acid | ABHD5     | 22.373  |
| DG | Phenylacetic Acid | CA2       | 22.373  |
| DG | Phenylacetic Acid | RAB11FIP1 | 22.373  |
| DG | Phenylacetic Acid | ABCG1     | 22.373  |
| DG | Phenylacetic Acid | BCL2      | 122.778 |

|    |                   |          |         |
|----|-------------------|----------|---------|
| DG | Phenylacetic Acid | HCAR2    | 80.882  |
| DG | Phenylacetic Acid | TCAF1    | 55.444  |
| DG | Phenylacetic Acid | ANXA1    | 55.444  |
| DG | Phenylacetic Acid | ASPDH    | 22.373  |
| DG | Phenylacetic Acid | RGCC     | 22.373  |
| DG | Phenylacetic Acid | NR1H3    | 22.373  |
| DG | Phenylacetic Acid | MYF5     | 22.373  |
| DG | Phenylacetic Acid | SHOX2    | 22.373  |
| DG | Phenylacetic Acid | PRKDC    | 22.373  |
| DG | Phenylacetic Acid | FXYD1    | 22.373  |
| DG | Phenylacetic Acid | MEF2C    | 22.373  |
| DG | Phenylacetic Acid | AURKA    | 22.373  |
| DG | Phenylacetic Acid | MYOD1    | 22.373  |
| DG | Phenylacetic Acid | ALOX5AP  | 22.373  |
| DG | Phenylacetic Acid | IFNG     | 22.373  |
| DG | Phenylacetic Acid | NR1H2    | 22.373  |
| DG | Phenylacetic Acid | ANAPC2   | 22.373  |
| DG | Phenylacetic Acid | CAV3     | 22.373  |
| DG | Phenylacetic Acid | DNAJA3   | 22.373  |
| DG | Phenylacetic Acid | COL1A1   | 22.373  |
| DG | Phenylacetic Acid | KMO      | 22.373  |
| DG | Phenylacetic Acid | SNCA     | 22.373  |
| DG | Phenylacetic Acid | ALOX15   | 22.373  |
| DG | Phenylacetic Acid | KYNU     | 22.373  |
| DG | Phenylacetic Acid | PRDM16   | 22.373  |
| DG | Phenylacetic Acid | FABP2    | 122.778 |
| DG | Phenylacetic Acid | QPRT     | 80.882  |
| DG | Phenylacetic Acid | IL1B     | 55.444  |
| DG | Phenylacetic Acid | SERPINB7 | 55.444  |
| DG | Phenylacetic Acid | ATOH1    | 22.373  |
| DG | Phenylacetic Acid | SIRT1    | 22.373  |
| DG | Phenylacetic Acid | ADAMTS20 | 22.373  |
| DG | Phenylacetic Acid | ACMSD    | 22.373  |
| DG | Phenylacetic Acid | KITLG    | 22.373  |
| DG | Phenylacetic Acid | METRNL   | 22.373  |
| DG | Phenylacetic Acid | STX3     | 22.373  |
| DG | Phenylacetic Acid | PTGIS    | 22.373  |
| DG | Phenylacetic Acid | HEG1     | 22.373  |
| DG | Phenylacetic Acid | MCL1     | 22.373  |
| DG | Phenylacetic Acid | TCF3     | 22.373  |
| DG | Phenylacetic Acid | SEC24B   | 22.373  |
| DG | Phenylacetic Acid | NEUROD2  | 22.373  |
| DG | Phenylacetic Acid | HAAO     | 22.373  |
| DG | Phenylacetic Acid | HTT      | 22.373  |
| DG | Phenylacetic Acid | ZEB2     | 22.373  |
| DG | Phenylacetic Acid | BDNF     | 22.373  |
| DG | Phenylacetic Acid | NAPRT    | 22.373  |
| DG | Phenylacetic Acid | ADIPOQ   | 22.373  |
| DG | Phenylacetic Acid | PAWR     | 22.373  |
| DG | Phenylacetic Acid | FABP3    | 22.373  |
| DG | Phenylacetic Acid | RAG2     | 22.373  |

|    |             |         |        |
|----|-------------|---------|--------|
| DG | 1-Tridecene | KCND1   | 80.882 |
| DG | 1-Tridecene | GAMT    | 80.882 |
| DG | 1-Tridecene | CAT     | 80.882 |
| DG | 1-Tridecene | KCNC1   | 80.882 |
| DG | 1-Tridecene | KCND2   | 80.882 |
| DG | 1-Tridecene | KCND3   | 80.882 |
| DG | 1-Tridecene | KCNQ1   | 55.444 |
| DG | 1-Tridecene | CYGB    | 22.373 |
| DG | 1-Tridecene | IGF1    | 22.373 |
| DG | 1-Tridecene | EDN1    | 22.373 |
| DG | 1-Tridecene | CNTNAP4 | 22.373 |
| DG | 1-Tridecene | GRIN2A  | 22.373 |
| DG | 1-Tridecene | SPARC   | 22.373 |
| DG | 1-Tridecene | CRLF1   | 22.373 |
| DG | 1-Tridecene | ALDH1B1 | 22.373 |
| DG | 1-Tridecene | DARS    | 22.373 |
| DG | 1-Tridecene | MIP     | 22.373 |
| DG | 1-Tridecene | STX1A   | 22.373 |
| DG | 1-Tridecene | NRXN2   | 22.373 |
| DG | 1-Tridecene | DAB2IP  | 22.373 |
| DG | 1-Tridecene | KCNA3   | 80.882 |
| DG | 1-Tridecene | KCNC3   | 80.882 |
| DG | 1-Tridecene | KCNB1   | 80.882 |
| DG | 1-Tridecene | ADH1C   | 80.882 |
| DG | 1-Tridecene | ALDH2   | 80.882 |
| DG | 1-Tridecene | GUCY1B3 | 55.444 |
| DG | 1-Tridecene | FBP1    | 22.373 |
| DG | 1-Tridecene | NRXN3   | 22.373 |
| DG | 1-Tridecene | SHANK3  | 22.373 |
| DG | 1-Tridecene | OXT     | 22.373 |
| DG | 1-Tridecene | RNASE4  | 22.373 |
| DG | 1-Tridecene | SLC17A7 | 22.373 |
| DG | 1-Tridecene | SORCS3  | 22.373 |
| DG | 1-Tridecene | FADD    | 22.373 |
| DG | 1-Tridecene | LEP     | 22.373 |
| DG | 1-Tridecene | ANK3    | 22.373 |
| DG | 1-Tridecene | RYR3    | 22.373 |
| DG | 1-Tridecene | PAXBP1  | 22.373 |
| DG | 1-Tridecene | ADORA1  | 22.373 |
| DG | 1-Tridecene | CYP2E1  | 22.373 |
| DG | 1-Tridecene | PRKAB1  | 80.882 |
| DG | 1-Tridecene | KCNA1   | 80.882 |
| DG | 1-Tridecene | ADH1B   | 80.882 |
| DG | 1-Tridecene | KCNB2   | 80.882 |
| DG | 1-Tridecene | KCNA4   | 80.882 |
| DG | 1-Tridecene | GATM    | 55.444 |
| DG | 1-Tridecene | DGKI    | 22.373 |
| DG | 1-Tridecene | LRRC4B  | 22.373 |
| DG | 1-Tridecene | ACY3    | 22.373 |
| DG | 1-Tridecene | MAGI2   | 22.373 |
| DG | 1-Tridecene | RAB3A   | 22.373 |

|    |                |         |        |
|----|----------------|---------|--------|
| DG | 1-Tridecene    | CYP11A1 | 22.373 |
| DG | 1-Tridecene    | RNASE8  | 22.373 |
| DG | 1-Tridecene    | SNTG2   | 22.373 |
| DG | 1-Tridecene    | NLGN1   | 22.373 |
| DG | 1-Tridecene    | KCNE5   | 22.373 |
| DG | 1-Tridecene    | ZPR1    | 22.373 |
| DG | 1-Tridecene    | PAX7    | 22.373 |
| DG | 1-Tridecene    | ADH4    | 22.373 |
| DG | 1-Tridecene    | ACY1    | 22.373 |
| DG | 1-Tridecene    | ADH1A   | 80.882 |
| DG | 1-Tridecene    | KCNA2   | 80.882 |
| DG | 1-Tridecene    | DLG4    | 80.882 |
| DG | 1-Tridecene    | KCNA5   | 80.882 |
| DG | 1-Tridecene    | KCNA7   | 80.882 |
| DG | 1-Tridecene    | KCNK4   | 55.444 |
| DG | 1-Tridecene    | ADH7    | 22.373 |
| DG | 1-Tridecene    | AQP8    | 22.373 |
| DG | 1-Tridecene    | ASPA    | 22.373 |
| DG | 1-Tridecene    | APOE    | 22.373 |
| DG | 1-Tridecene    | MC4R    | 22.373 |
| DG | 1-Tridecene    | SCN5A   | 22.373 |
| DG | 1-Tridecene    | KCNIP2  | 22.373 |
| DG | 1-Tridecene    | SCGB1A1 | 22.373 |
| DG | 1-Tridecene    | CACNA1D | 22.373 |
| DG | 1-Tridecene    | PPARD   | 22.373 |
| DG | 1-Tridecene    | ALDH3B1 | 22.373 |
| DG | 1-Tridecene    | ALDH3B2 | 22.373 |
| DG | 1-Tridecene    | GJA5    | 22.373 |
| DG | 1-Tridecene    | KCNA10  | 80.882 |
| DG | 1-Tridecene    | TPO     | 80.882 |
| DG | 1-Tridecene    | KCNC2   | 80.882 |
| DG | 1-Tridecene    | RNASE1  | 80.882 |
| DG | 1-Tridecene    | KCNA6   | 80.882 |
| DG | 1-Tridecene    | IYD     | 55.444 |
| DG | 1-Tridecene    | NFIB    | 22.373 |
| DG | 1-Tridecene    | ARX     | 22.373 |
| DG | 1-Tridecene    | NRXN1   | 22.373 |
| DG | 1-Tridecene    | SOX15   | 22.373 |
| DG | 1-Tridecene    | IL1B    | 22.373 |
| DG | 1-Tridecene    | SCN10A  | 22.373 |
| DG | 1-Tridecene    | GPX7    | 22.373 |
| DG | 1-Tridecene    | OXTR    | 22.373 |
| DG | 1-Tridecene    | RAPGEF2 | 22.373 |
| DG | 1-Tridecene    | NKX2-1  | 22.373 |
| DG | 1-Tridecene    | NPPA    | 22.373 |
| DG | 1-Tridecene    | RNASE2  | 22.373 |
| DG | 1-Tridecene    | FAS     | 22.373 |
| DG | Sebiferic Acid | RXRBR   | 80.882 |
| DG | Sebiferic Acid | NR0B1   | 80.882 |
| DG | Sebiferic Acid | CKM     | 80.882 |
| DG | Sebiferic Acid | PPARD   | 80.882 |



|    |                |          |        |
|----|----------------|----------|--------|
| DG | Sebiferic Acid | PTGS2    | 80.882 |
| DG | Sebiferic Acid | CKB      | 80.882 |
| DG | Sebiferic Acid | APOA2    | 55.444 |
| DG | Sebiferic Acid | IL13     | 55.444 |
| DG | Sebiferic Acid | COL27A1  | 55.444 |
| DG | Sebiferic Acid | SCN1A    | 48     |
| DG | Sebiferic Acid | COX7C    | 48     |
| DG | Sebiferic Acid | SCN7A    | 48     |
| DG | Sebiferic Acid | SCN2A    | 48     |
| DG | Sebiferic Acid | FECH     | 48     |
| DG | Sebiferic Acid | COX6A2   | 48     |
| DG | Sebiferic Acid | ADH1C    | 48     |
| DG | Sebiferic Acid | ACADSB   | 48     |
| DG | Sebiferic Acid | OGDH     | 48     |
| DG | Sebiferic Acid | NDRG2    | 22.373 |
| DG | Sebiferic Acid | HOPX     | 22.373 |
| DG | Sebiferic Acid | OSBPL8   | 22.373 |
| DG | Sebiferic Acid | ELOVL3   | 22.373 |
| DG | Sebiferic Acid | METRNL   | 22.373 |
| DG | Sebiferic Acid | FOXA1    | 22.373 |
| DG | Sebiferic Acid | SOX15    | 22.373 |
| DG | Sebiferic Acid | EIF2AK1  | 22.373 |
| DG | Sebiferic Acid | SLC8A2   | 22.373 |
| DG | Sebiferic Acid | ABCF1    | 22.373 |
| DG | Sebiferic Acid | ITGAV    | 22.373 |
| DG | Sebiferic Acid | PTPN2    | 22.373 |
| DG | Sebiferic Acid | PAX2     | 22.373 |
| DG | Sebiferic Acid | NR1H2    | 22.373 |
| DG | Sebiferic Acid | AGTR2    | 22.373 |
| DG | Sebiferic Acid | ANAPC2   | 22.373 |
| DG | Sebiferic Acid | CDC20    | 22.373 |
| DG | Sebiferic Acid | NR1D1    | 22.373 |
| DG | Sebiferic Acid | ELOVL7   | 22.373 |
| DG | Sebiferic Acid | WDR77    | 22.373 |
| DG | Sebiferic Acid | GJD4     | 22.373 |
| DG | Sebiferic Acid | CPLX2    | 22.373 |
| DG | Sebiferic Acid | SLC35G1  | 22.373 |
| DG | Sebiferic Acid | DHRS9    | 22.373 |
| DG | Sebiferic Acid | FGF2     | 22.373 |
| DG | Sebiferic Acid | TRPA1    | 22.373 |
| DG | Sebiferic Acid | SLC8A1   | 80.882 |
| DG | Sebiferic Acid | TRPV1    | 80.882 |
| DG | Sebiferic Acid | RARB     | 80.882 |
| DG | Sebiferic Acid | SLC6A8   | 80.882 |
| DG | Sebiferic Acid | CKMT1A   | 80.882 |
| DG | Sebiferic Acid | GPRC5A   | 80.882 |
| DG | Sebiferic Acid | ALDH3A1  | 55.444 |
| DG | Sebiferic Acid | GATM     | 55.444 |
| DG | Sebiferic Acid | SERPINB7 | 55.444 |
| DG | Sebiferic Acid | ESRRG    | 48     |
| DG | Sebiferic Acid | COX1     | 48     |

|    |                |          |        |
|----|----------------|----------|--------|
| DG | Sebiferic Acid | SCN5A    | 48     |
| DG | Sebiferic Acid | COX5A    | 48     |
| DG | Sebiferic Acid | PLG      | 48     |
| DG | Sebiferic Acid | TYR      | 48     |
| DG | Sebiferic Acid | COX6B1   | 48     |
| DG | Sebiferic Acid | SCN8A    | 48     |
| DG | Sebiferic Acid | HDAC2    | 48     |
| DG | Sebiferic Acid | NAMPT    | 22.373 |
| DG | Sebiferic Acid | LARP4B   | 22.373 |
| DG | Sebiferic Acid | IGF1     | 22.373 |
| DG | Sebiferic Acid | FASLG    | 22.373 |
| DG | Sebiferic Acid | ELOVL1   | 22.373 |
| DG | Sebiferic Acid | NUFIP2   | 22.373 |
| DG | Sebiferic Acid | OXER1    | 22.373 |
| DG | Sebiferic Acid | CYP4F2   | 22.373 |
| DG | Sebiferic Acid | ALDH8A1  | 22.373 |
| DG | Sebiferic Acid | SERPINH1 | 22.373 |
| DG | Sebiferic Acid | GNAT2    | 22.373 |
| DG | Sebiferic Acid | S100A8   | 22.373 |
| DG | Sebiferic Acid | SP1      | 22.373 |
| DG | Sebiferic Acid | NEUROD2  | 22.373 |
| DG | Sebiferic Acid | JAK3     | 22.373 |
| DG | Sebiferic Acid | WNT11    | 22.373 |
| DG | Sebiferic Acid | DNAJA3   | 22.373 |
| DG | Sebiferic Acid | SLC3A2   | 22.373 |
| DG | Sebiferic Acid | PAX7     | 22.373 |
| DG | Sebiferic Acid | MECOM    | 22.373 |
| DG | Sebiferic Acid | SNCA     | 22.373 |
| DG | Sebiferic Acid | PPARA    | 22.373 |
| DG | Sebiferic Acid | NOS1     | 22.373 |
| DG | Sebiferic Acid | S100A9   | 22.373 |
| DG | Sebiferic Acid | ABCG1    | 22.373 |
| DG | Sebiferic Acid | GAMT     | 80.882 |
| DG | Sebiferic Acid | RARG     | 80.882 |
| DG | Sebiferic Acid | RXRG     | 80.882 |
| DG | Sebiferic Acid | PTGS1    | 80.882 |
| DG | Sebiferic Acid | ELOVL4   | 80.882 |
| DG | Sebiferic Acid | RXRA     | 80.882 |
| DG | Sebiferic Acid | IL1B     | 55.444 |
| DG | Sebiferic Acid | SC5D     | 55.444 |
| DG | Sebiferic Acid | SCN11A   | 48     |
| DG | Sebiferic Acid | SCN3B    | 48     |
| DG | Sebiferic Acid | F12      | 48     |
| DG | Sebiferic Acid | SCN10A   | 48     |
| DG | Sebiferic Acid | COX3     | 48     |
| DG | Sebiferic Acid | COX4I1   | 48     |
| DG | Sebiferic Acid | SCN9A    | 48     |
| DG | Sebiferic Acid | FABP6    | 48     |
| DG | Sebiferic Acid | COX7B    | 48     |
| DG | Sebiferic Acid | COX8A    | 48     |
| DG | Sebiferic Acid | RGCC     | 22.373 |

|    |                |          |        |
|----|----------------|----------|--------|
| DG | Sebiferic Acid | FNDC5    | 22.373 |
| DG | Sebiferic Acid | AVPR1A   | 22.373 |
| DG | Sebiferic Acid | CACNA1A  | 22.373 |
| DG | Sebiferic Acid | MAPK9    | 22.373 |
| DG | Sebiferic Acid | ADRA2A   | 22.373 |
| DG | Sebiferic Acid | RPL7A    | 22.373 |
| DG | Sebiferic Acid | PTGIS    | 22.373 |
| DG | Sebiferic Acid | SHBG     | 22.373 |
| DG | Sebiferic Acid | NPPC     | 22.373 |
| DG | Sebiferic Acid | MATN1    | 22.373 |
| DG | Sebiferic Acid | ALOX5AP  | 22.373 |
| DG | Sebiferic Acid | SLC6A4   | 22.373 |
| DG | Sebiferic Acid | FGF4     | 22.373 |
| DG | Sebiferic Acid | GNB2L1   | 22.373 |
| DG | Sebiferic Acid | TBC1D32  | 22.373 |
| DG | Sebiferic Acid | RET      | 22.373 |
| DG | Sebiferic Acid | PAXBP1   | 22.373 |
| DG | Sebiferic Acid | SCD      | 22.373 |
| DG | Sebiferic Acid | PLCB1    | 22.373 |
| DG | Sebiferic Acid | ADIPOQ   | 22.373 |
| DG | Sebiferic Acid | MYL2     | 22.373 |
| DG | Sebiferic Acid | TRPM8    | 22.373 |
| DG | Sebiferic Acid | VDR      | 22.373 |
| DG | Sebiferic Acid | PRDM16   | 22.373 |
| DG | Sebiferic Acid | CKMT1B   | 80.882 |
| DG | Sebiferic Acid | PPARG    | 80.882 |
| DG | Sebiferic Acid | FADS2    | 80.882 |
| DG | Sebiferic Acid | ACSL4    | 80.882 |
| DG | Sebiferic Acid | ALDH1A1  | 80.882 |
| DG | Sebiferic Acid | ALDH1A2  | 80.882 |
| DG | Sebiferic Acid | TNF      | 55.444 |
| DG | Sebiferic Acid | SLC16A12 | 55.444 |
| DG | Sebiferic Acid | SCN2B    | 48     |
| DG | Sebiferic Acid | COX6C    | 48     |
| DG | Sebiferic Acid | SCN3A    | 48     |
| DG | Sebiferic Acid | AKR1D1   | 48     |
| DG | Sebiferic Acid | AR       | 48     |
| DG | Sebiferic Acid | HDAC9    | 48     |
| DG | Sebiferic Acid | SCN4A    | 48     |
| DG | Sebiferic Acid | CES1     | 48     |
| DG | Sebiferic Acid | SCN1B    | 48     |
| DG | Sebiferic Acid | NR1H4    | 48     |
| DG | Sebiferic Acid | IHH      | 22.373 |
| DG | Sebiferic Acid | SLC8B1   | 22.373 |
| DG | Sebiferic Acid | MED1     | 22.373 |
| DG | Sebiferic Acid | PLA2R1   | 22.373 |
| DG | Sebiferic Acid | MAP4K4   | 22.373 |
| DG | Sebiferic Acid | OPN4     | 22.373 |
| DG | Sebiferic Acid | PNPLA2   | 22.373 |
| DG | Sebiferic Acid | CNST     | 22.373 |
| DG | Sebiferic Acid | SLC8A3   | 22.373 |

|    |                |          |        |
|----|----------------|----------|--------|
| DG | Sebiferic Acid | HEG1     | 22.373 |
| DG | Sebiferic Acid | MYOD1    | 22.373 |
| DG | Sebiferic Acid | TCF3     | 22.373 |
| DG | Sebiferic Acid | SP3      | 22.373 |
| DG | Sebiferic Acid | SCD5     | 22.373 |
| DG | Sebiferic Acid | GATA3    | 22.373 |
| DG | Sebiferic Acid | JUNB     | 22.373 |
| DG | Sebiferic Acid | KCNA5    | 22.373 |
| DG | Sebiferic Acid | MEX3C    | 22.373 |
| DG | Sebiferic Acid | ABCA1    | 22.373 |
| DG | Sebiferic Acid | ABHD5    | 22.373 |
| DG | Sebiferic Acid | RYR2     | 22.373 |
| DG | Sebiferic Acid | ALOX15   | 22.373 |
| DG | Sebiferic Acid | PAWR     | 22.373 |
| DG | Sebiferic Acid | FABP3    | 22.373 |
| DG | Sebiferic Acid | CYR61    | 22.373 |
| DG | Sebiferic Acid | RARRES1  | 80.882 |
| DG | Sebiferic Acid | FFAR1    | 80.882 |
| DG | Sebiferic Acid | FADS1    | 80.882 |
| DG | Sebiferic Acid | CKMT2    | 80.882 |
| DG | Sebiferic Acid | RARA     | 80.882 |
| DG | Sebiferic Acid | ACSL3    | 80.882 |
| DG | Sebiferic Acid | SLC9A1   | 55.444 |
| DG | Sebiferic Acid | LPCAT1   | 55.444 |
| DG | Sebiferic Acid | ABAT     | 48     |
| DG | Sebiferic Acid | COX5B    | 48     |
| DG | Sebiferic Acid | AKR1C2   | 48     |
| DG | Sebiferic Acid | ALDH5A1  | 48     |
| DG | Sebiferic Acid | COX7A1   | 48     |
| DG | Sebiferic Acid | PLA2G1B  | 48     |
| DG | Sebiferic Acid | SCN4B    | 48     |
| DG | Sebiferic Acid | SRD5A2   | 48     |
| DG | Sebiferic Acid | COX2     | 48     |
| DG | Sebiferic Acid | ABCC2    | 22.373 |
| DG | Sebiferic Acid | OPN3     | 22.373 |
| DG | Sebiferic Acid | NR1H3    | 22.373 |
| DG | Sebiferic Acid | FMR1     | 22.373 |
| DG | Sebiferic Acid | ITGB3    | 22.373 |
| DG | Sebiferic Acid | ANXA13   | 22.373 |
| DG | Sebiferic Acid | STX3     | 22.373 |
| DG | Sebiferic Acid | CAPN3    | 22.373 |
| DG | Sebiferic Acid | GDF5     | 22.373 |
| DG | Sebiferic Acid | FGF10    | 22.373 |
| DG | Sebiferic Acid | PPARGC1B | 22.373 |
| DG | Sebiferic Acid | ELOVL6   | 22.373 |
| DG | Sebiferic Acid | AVP      | 22.373 |
| DG | Sebiferic Acid | BDKRB2   | 22.373 |
| DG | Sebiferic Acid | INS      | 22.373 |
| DG | Sebiferic Acid | ZNF536   | 22.373 |
| DG | Sebiferic Acid | ALOX15B  | 22.373 |
| DG | Sebiferic Acid | COL1A1   | 22.373 |

|    |                 |          |         |
|----|-----------------|----------|---------|
| DG | Sebiferic Acid  | NOTCH1   | 22.373  |
| DG | Sebiferic Acid  | NAPRT    | 22.373  |
| DG | Sebiferic Acid  | TSPO     | 22.373  |
| DG | Sebiferic Acid  | NODAL    | 22.373  |
| DG | Sebiferic Acid  | ANXA1    | 22.373  |
| DG | Sebiferic Acid  | SOX9     | 22.373  |
| DG | Sebiferic Acid  | CYP1A1   | 22.373  |
| DG | Sebiferic Acid  | CCM2L    | 22.373  |
| DG | Alpha-Terpineol | ESR1     | 122.778 |
| DG | Alpha-Terpineol | ANXA1    | 48      |
| DG | Alpha-Terpineol | TOX3     | 22.373  |
| DG | Alpha-Terpineol | NEDD4    | 22.373  |
| DG | Alpha-Terpineol | SRC      | 22.373  |
| DG | Alpha-Terpineol | WNT5A    | 22.373  |
| DG | Alpha-Terpineol | PGR      | 122.778 |
| DG | Alpha-Terpineol | VDR      | 48      |
| DG | Alpha-Terpineol | TGFB1    | 22.373  |
| DG | Alpha-Terpineol | SHH      | 22.373  |
| DG | Alpha-Terpineol | UBR5     | 22.373  |
| DG | Alpha-Terpineol | SOX9     | 22.373  |
| DG | Alpha-Terpineol | WNT4     | 55.444  |
| DG | Alpha-Terpineol | TFAP2C   | 22.373  |
| DG | Alpha-Terpineol | MED1     | 22.373  |
| DG | Alpha-Terpineol | SERPINB3 | 22.373  |
| DG | Alpha-Terpineol | AREG     | 22.373  |
| DG | Alpha-Terpineol | PDGFB    | 22.373  |
| DG | Alpha-Terpineol | AR       | 48      |
| DG | Alpha-Terpineol | TNFSF11  | 22.373  |
| DG | Alpha-Terpineol | NKX3-1   | 22.373  |
| DG | Alpha-Terpineol | LEF1     | 22.373  |
| DG | Alpha-Terpineol | CD34     | 22.373  |
| DG | Alpha-Terpineol | TRIM24   | 22.373  |
| DG | Alpha-Terpineol | NR3C1    | 48      |
| DG | Alpha-Terpineol | PHB      | 22.373  |
| DG | Alpha-Terpineol | ESR2     | 22.373  |
| DG | Alpha-Terpineol | FGFR2    | 22.373  |
| DG | Alpha-Terpineol | GPER1    | 22.373  |
| DG | Scopoletin      | COMT     | 373     |
| DG | Scopoletin      | ALOX5    | 23      |
| DG | Scopoletin      | SEC14L4  | 23      |
| DG | Scopoletin      | SEC14L3  | 23      |
| DG | Scopoletin      | PPP2CB   | 23      |
| DG | Scopoletin      | PPP2CA   | 23      |
| DG | Scopoletin      | SEC14L2  | 23      |
| DG | Scopoletin      | PRKCA    | 23      |
| DG | Scopoletin      | DGKA     | 23      |
| DG | Scopoletin      | NR112    | 23      |
| DG | Scopoletin      | PRKCB    | 23      |
| DG | Angelicin       | SOAT1    | 140.5   |
| DG | Angelicin       | ABCC2    | 114.143 |
| DG | Angelicin       | ACSS2    | 114.143 |

|    |           |         |         |
|----|-----------|---------|---------|
| DG | Angelicin | TNK2    | 114.143 |
| DG | Angelicin | ABCC9   | 114.143 |
| DG | Angelicin | ASS1    | 114.143 |
| DG | Angelicin | APAF1   | 114.143 |
| DG | Angelicin | ABCG1   | 114.143 |
| DG | Angelicin | GC      | 55.444  |
| DG | Angelicin | SLC25A5 | 25.857  |
| DG | Angelicin | CYP24A1 | 22.373  |
| DG | Angelicin | CYP3A4  | 22.373  |
| DG | Angelicin | WNT4    | 22.373  |
| DG | Angelicin | PML     | 22.373  |
| DG | Angelicin | IRX5    | 22.373  |
| DG | Angelicin | ANPEP   | 140.5   |
| DG | Angelicin | AKT1    | 114.143 |
| DG | Angelicin | ACVRL1  | 114.143 |
| DG | Angelicin | ASNS    | 114.143 |
| DG | Angelicin | ACSS1   | 114.143 |
| DG | Angelicin | ACVR1B  | 114.143 |
| DG | Angelicin | ABCC8   | 114.143 |
| DG | Angelicin | ARAF    | 114.143 |
| DG | Angelicin | SNW1    | 55.444  |
| DG | Angelicin | SLC25A6 | 25.857  |
| DG | Angelicin | GPBAR1  | 22.373  |
| DG | Angelicin | CALB1   | 22.373  |
| DG | Angelicin | TCF3    | 22.373  |
| DG | Angelicin | B4GALT1 | 22.373  |
| DG | Angelicin | RXRA    | 22.373  |
| DG | Angelicin | NPC1L1  | 140.5   |
| DG | Angelicin | ACVR1   | 114.143 |
| DG | Angelicin | ADCY1   | 114.143 |
| DG | Angelicin | ABL2    | 114.143 |
| DG | Angelicin | ABL1    | 114.143 |
| DG | Angelicin | ACSL1   | 114.143 |
| DG | Angelicin | ALK     | 114.143 |
| DG | Angelicin | SLC25A4 | 114.143 |
| DG | Angelicin | AR      | 48      |
| DG | Angelicin | AKT2    | 25.857  |
| DG | Angelicin | SNAI2   | 22.373  |
| DG | Angelicin | FGF23   | 22.373  |
| DG | Angelicin | BAX     | 22.373  |
| DG | Angelicin | S100G   | 22.373  |
| DG | Angelicin | NR1H4   | 22.373  |
| DG | Angelicin | ESR1    | 122.778 |
| DG | Angelicin | ASNA1   | 114.143 |
| DG | Angelicin | NT5C2   | 114.143 |
| DG | Angelicin | ADRBK1  | 114.143 |
| DG | Angelicin | AFG3L2  | 114.143 |
| DG | Angelicin | ABCA1   | 114.143 |
| DG | Angelicin | ABCB11  | 114.143 |
| DG | Angelicin | VDR     | 80.882  |
| DG | Angelicin | NR3C1   | 48      |

|    |                          |          |         |
|----|--------------------------|----------|---------|
| DG | Angelicin                | NFKB1    | 22.373  |
| DG | Angelicin                | MED1     | 22.373  |
| DG | Angelicin                | GFI1     | 22.373  |
| DG | Angelicin                | KL       | 22.373  |
| DG | Angelicin                | CYP27A1  | 22.373  |
| DG | Angelicin                | TRIM24   | 22.373  |
| DG | Angelicin                | PGR      | 122.778 |
| DG | Angelicin                | ADRBK2   | 114.143 |
| DG | Angelicin                | AMHR2    | 114.143 |
| DG | Angelicin                | PRKAA1   | 114.143 |
| DG | Angelicin                | CDK15    | 114.143 |
| DG | Angelicin                | NAE1     | 114.143 |
| DG | Angelicin                | ABCB1    | 114.143 |
| DG | Angelicin                | CYP27B1  | 80.882  |
| DG | Angelicin                | AKT3     | 25.857  |
| DG | Angelicin                | AKR1C3   | 22.373  |
| DG | Angelicin                | SNAI1    | 22.373  |
| DG | Angelicin                | LANCL2   | 22.373  |
| DG | Angelicin                | CYP2R1   | 22.373  |
| DG | Angelicin                | KANK2    | 22.373  |
| DG | Ethyl-P-Methoxycinnamate | RXRB     | 80.882  |
| DG | Ethyl-P-Methoxycinnamate | RARA     | 80.882  |
| DG | Ethyl-P-Methoxycinnamate | PTGS2    | 23      |
| DG | Ethyl-P-Methoxycinnamate | EIF2AK1  | 22.373  |
| DG | Ethyl-P-Methoxycinnamate | MATN1    | 22.373  |
| DG | Ethyl-P-Methoxycinnamate | TBC1D32  | 22.373  |
| DG | Ethyl-P-Methoxycinnamate | VDR      | 22.373  |
| DG | Ethyl-P-Methoxycinnamate | RARG     | 80.882  |
| DG | Ethyl-P-Methoxycinnamate | RXRA     | 80.882  |
| DG | Ethyl-P-Methoxycinnamate | PPARA    | 23      |
| DG | Ethyl-P-Methoxycinnamate | GDF5     | 22.373  |
| DG | Ethyl-P-Methoxycinnamate | TCF3     | 22.373  |
| DG | Ethyl-P-Methoxycinnamate | MEX3C    | 22.373  |
| DG | Ethyl-P-Methoxycinnamate | FGF2     | 22.373  |
| DG | Ethyl-P-Methoxycinnamate | RARB     | 80.882  |
| DG | Ethyl-P-Methoxycinnamate | TNF      | 55.444  |
| DG | Ethyl-P-Methoxycinnamate | IHH      | 22.373  |
| DG | Ethyl-P-Methoxycinnamate | FGF10    | 22.373  |
| DG | Ethyl-P-Methoxycinnamate | PAX2     | 22.373  |
| DG | Ethyl-P-Methoxycinnamate | NOTCH1   | 22.373  |
| DG | Ethyl-P-Methoxycinnamate | CYR61    | 22.373  |
| DG | Ethyl-P-Methoxycinnamate | RXRG     | 80.882  |
| DG | Ethyl-P-Methoxycinnamate | COL27A1  | 55.444  |
| DG | Ethyl-P-Methoxycinnamate | MED1     | 22.373  |
| DG | Ethyl-P-Methoxycinnamate | SERPINH1 | 22.373  |
| DG | Ethyl-P-Methoxycinnamate | FGF4     | 22.373  |
| DG | Ethyl-P-Methoxycinnamate | WDR77    | 22.373  |
| DG | Ethyl-P-Methoxycinnamate | RBP1     | 80.882  |
| DG | Ethyl-P-Methoxycinnamate | PTGS1    | 23      |
| DG | Ethyl-P-Methoxycinnamate | FOXA1    | 22.373  |
| DG | Ethyl-P-Methoxycinnamate | NPPC     | 22.373  |

|    |                          |          |         |
|----|--------------------------|----------|---------|
| DG | Ethyl-P-Methoxycinnamate | ZNF536   | 22.373  |
| DG | Ethyl-P-Methoxycinnamate | SOX9     | 22.373  |
| DG | Decanoic Acid            | AKR1D1   | 686     |
| DG | Decanoic Acid            | ABAT     | 122.778 |
| DG | Decanoic Acid            | COX5B    | 122.778 |
| DG | Decanoic Acid            | SCN7A    | 122.778 |
| DG | Decanoic Acid            | COX5A    | 122.778 |
| DG | Decanoic Acid            | COX4I1   | 122.778 |
| DG | Decanoic Acid            | SCN4A    | 122.778 |
| DG | Decanoic Acid            | CES1     | 122.778 |
| DG | Decanoic Acid            | COX2     | 122.778 |
| DG | Decanoic Acid            | SUCLG2   | 80.882  |
| DG | Decanoic Acid            | SLC25A10 | 80.882  |
| DG | Decanoic Acid            | SUCNR1   | 80.882  |
| DG | Decanoic Acid            | OXCT1    | 80.882  |
| DG | Decanoic Acid            | SDHA     | 80.882  |
| DG | Decanoic Acid            | DCT      | 55.444  |
| DG | Decanoic Acid            | JMJD6    | 55.444  |
| DG | Decanoic Acid            | HSD17B11 | 55.444  |
| DG | Decanoic Acid            | P4HB     | 55.444  |
| DG | Decanoic Acid            | GRIN3B   | 48      |
| DG | Decanoic Acid            | CACNA1B  | 48      |
| DG | Decanoic Acid            | GRIN3A   | 48      |
| DG | Decanoic Acid            | GRIN1    | 48      |
| DG | Decanoic Acid            | SIRT1    | 22.373  |
| DG | Decanoic Acid            | SIX1     | 22.373  |
| DG | Decanoic Acid            | OSBPL8   | 22.373  |
| DG | Decanoic Acid            | UBE2B    | 22.373  |
| DG | Decanoic Acid            | STIM2    | 22.373  |
| DG | Decanoic Acid            | COLGALT1 | 22.373  |
| DG | Decanoic Acid            | ARID1A   | 22.373  |
| DG | Decanoic Acid            | ACOT4    | 22.373  |
| DG | Decanoic Acid            | SLC25A12 | 22.373  |
| DG | Decanoic Acid            | CDH11    | 22.373  |
| DG | Decanoic Acid            | BDKRB2   | 22.373  |
| DG | Decanoic Acid            | SMAD7    | 22.373  |
| DG | Decanoic Acid            | WNT10B   | 22.373  |
| DG | Decanoic Acid            | STAR     | 22.373  |
| DG | Decanoic Acid            | CAMK2D   | 22.373  |
| DG | Decanoic Acid            | HTT      | 22.373  |
| DG | Decanoic Acid            | TST      | 22.373  |
| DG | Decanoic Acid            | TMEM110  | 22.373  |
| DG | Decanoic Acid            | EPHA4    | 22.373  |
| DG | Decanoic Acid            | EDA      | 22.373  |
| DG | Decanoic Acid            | KCNQ1    | 22.373  |
| DG | Decanoic Acid            | UGT1A1   | 22.373  |
| DG | Decanoic Acid            | PLOD2    | 22.373  |
| DG | Decanoic Acid            | SLC25A1  | 22.373  |
| DG | Decanoic Acid            | TYR      | 686     |
| DG | Decanoic Acid            | SCN1A    | 122.778 |
| DG | Decanoic Acid            | COX7C    | 122.778 |



|    |               |          |         |
|----|---------------|----------|---------|
| DG | Decanoic Acid | SCN5A    | 122.778 |
| DG | Decanoic Acid | COX3     | 122.778 |
| DG | Decanoic Acid | HDAC9    | 122.778 |
| DG | Decanoic Acid | SCN4B    | 122.778 |
| DG | Decanoic Acid | ACADSB   | 122.778 |
| DG | Decanoic Acid | OGDH     | 122.778 |
| DG | Decanoic Acid | SLC13A2  | 80.882  |
| DG | Decanoic Acid | P3H3     | 80.882  |
| DG | Decanoic Acid | SLC13A3  | 80.882  |
| DG | Decanoic Acid | PLOD3    | 80.882  |
| DG | Decanoic Acid | P4HA2    | 80.882  |
| DG | Decanoic Acid | AKR1C3   | 55.444  |
| DG | Decanoic Acid | SLC13A4  | 55.444  |
| DG | Decanoic Acid | TYRP1    | 55.444  |
| DG | Decanoic Acid | CACNA2D1 | 48      |
| DG | Decanoic Acid | CACNA2D2 | 48      |
| DG | Decanoic Acid | GRIN2C   | 48      |
| DG | Decanoic Acid | SLC7A1   | 48      |
| DG | Decanoic Acid | HDAC1    | 23      |
| DG | Decanoic Acid | SHMT1    | 22.373  |
| DG | Decanoic Acid | BDH1     | 22.373  |
| DG | Decanoic Acid | SPI1     | 22.373  |
| DG | Decanoic Acid | CYP1A2   | 22.373  |
| DG | Decanoic Acid | PKD2     | 22.373  |
| DG | Decanoic Acid | NEDD4    | 22.373  |
| DG | Decanoic Acid | EGLN2    | 22.373  |
| DG | Decanoic Acid | PHGDH    | 22.373  |
| DG | Decanoic Acid | YBX3     | 22.373  |
| DG | Decanoic Acid | CACNA1D  | 22.373  |
| DG | Decanoic Acid | PRPH     | 22.373  |
| DG | Decanoic Acid | PRDM8    | 22.373  |
| DG | Decanoic Acid | OGFOD1   | 22.373  |
| DG | Decanoic Acid | DLST     | 22.373  |
| DG | Decanoic Acid | AP3D1    | 22.373  |
| DG | Decanoic Acid | IL10     | 22.373  |
| DG | Decanoic Acid | SLC1A6   | 22.373  |
| DG | Decanoic Acid | CDC42    | 22.373  |
| DG | Decanoic Acid | OCA2     | 22.373  |
| DG | Decanoic Acid | HACL1    | 22.373  |
| DG | Decanoic Acid | CASQ2    | 22.373  |
| DG | Decanoic Acid | DLD      | 22.373  |
| DG | Decanoic Acid | CYP1A1   | 22.373  |
| DG | Decanoic Acid | SRD5A2   | 686     |
| DG | Decanoic Acid | ESRRG    | 122.778 |
| DG | Decanoic Acid | COX1     | 122.778 |
| DG | Decanoic Acid | SCN10A   | 122.778 |
| DG | Decanoic Acid | AR       | 122.778 |
| DG | Decanoic Acid | PLA2G1B  | 122.778 |
| DG | Decanoic Acid | ADH1C    | 122.778 |
| DG | Decanoic Acid | SCN8A    | 122.778 |
| DG | Decanoic Acid | HDAC2    | 122.778 |

|    |               |          |         |
|----|---------------|----------|---------|
| DG | Decanoic Acid | SLC13A1  | 80.882  |
| DG | Decanoic Acid | OXCT2    | 80.882  |
| DG | Decanoic Acid | ASPH     | 80.882  |
| DG | Decanoic Acid | P4HA1    | 80.882  |
| DG | Decanoic Acid | SUCLA2   | 80.882  |
| DG | Decanoic Acid | CRTAP    | 55.444  |
| DG | Decanoic Acid | SDHAF2   | 55.444  |
| DG | Decanoic Acid | HIF1AN   | 55.444  |
| DG | Decanoic Acid | PLAT     | 48      |
| DG | Decanoic Acid | GRIN2A   | 48      |
| DG | Decanoic Acid | GRIN2B   | 48      |
| DG | Decanoic Acid | SLC7A4   | 48      |
| DG | Decanoic Acid | GPD1L    | 22.373  |
| DG | Decanoic Acid | SUGCT    | 22.373  |
| DG | Decanoic Acid | COLGALT2 | 22.373  |
| DG | Decanoic Acid | SUOX     | 22.373  |
| DG | Decanoic Acid | CCL5     | 22.373  |
| DG | Decanoic Acid | ALDH9A1  | 22.373  |
| DG | Decanoic Acid | CYP11A1  | 22.373  |
| DG | Decanoic Acid | ACAT1    | 22.373  |
| DG | Decanoic Acid | PNLIPRP2 | 22.373  |
| DG | Decanoic Acid | 8-Mar    | 22.373  |
| DG | Decanoic Acid | DDC      | 22.373  |
| DG | Decanoic Acid | BCKDHB   | 22.373  |
| DG | Decanoic Acid | UROD     | 22.373  |
| DG | Decanoic Acid | SLC38A7  | 22.373  |
| DG | Decanoic Acid | PF4      | 22.373  |
| DG | Decanoic Acid | MYO5A    | 22.373  |
| DG | Decanoic Acid | EGLN3    | 22.373  |
| DG | Decanoic Acid | NPPA     | 22.373  |
| DG | Decanoic Acid | ARHGEF2  | 22.373  |
| DG | Decanoic Acid | HSD17B8  | 22.373  |
| DG | Decanoic Acid | RYR2     | 22.373  |
| DG | Decanoic Acid | GJA5     | 22.373  |
| DG | Decanoic Acid | GNAS     | 22.373  |
| DG | Decanoic Acid | SULT2A1  | 22.373  |
| DG | Decanoic Acid | SCN11A   | 122.778 |
| DG | Decanoic Acid | SCN3B    | 122.778 |
| DG | Decanoic Acid | SCN3A    | 122.778 |
| DG | Decanoic Acid | ALDH5A1  | 122.778 |
| DG | Decanoic Acid | COX7A1   | 122.778 |
| DG | Decanoic Acid | COX6A2   | 122.778 |
| DG | Decanoic Acid | COX6B1   | 122.778 |
| DG | Decanoic Acid | COX7B    | 122.778 |
| DG | Decanoic Acid | COX8A    | 122.778 |
| DG | Decanoic Acid | SUCLG1   | 80.882  |
| DG | Decanoic Acid | TMLHE    | 80.882  |
| DG | Decanoic Acid | BBOX1    | 80.882  |
| DG | Decanoic Acid | SDHC     | 80.882  |
| DG | Decanoic Acid | SDHD     | 80.882  |
| DG | Decanoic Acid | SLIT2    | 55.444  |

|    |               |          |         |
|----|---------------|----------|---------|
| DG | Decanoic Acid | SLC1A3   | 55.444  |
| DG | Decanoic Acid | UROS     | 55.444  |
| DG | Decanoic Acid | SLC7A2   | 48      |
| DG | Decanoic Acid | TOP1     | 48      |
| DG | Decanoic Acid | SLC7A3   | 48      |
| DG | Decanoic Acid | GRIN2D   | 48      |
| DG | Decanoic Acid | SRD5A1   | 22.373  |
| DG | Decanoic Acid | ACSS2    | 22.373  |
| DG | Decanoic Acid | SIX4     | 22.373  |
| DG | Decanoic Acid | CCL2     | 22.373  |
| DG | Decanoic Acid | ANK2     | 22.373  |
| DG | Decanoic Acid | TH       | 22.373  |
| DG | Decanoic Acid | DHODH    | 22.373  |
| DG | Decanoic Acid | GALC     | 22.373  |
| DG | Decanoic Acid | CYP39A1  | 22.373  |
| DG | Decanoic Acid | STIM1    | 22.373  |
| DG | Decanoic Acid | DHTKD1   | 22.373  |
| DG | Decanoic Acid | KCNE5    | 22.373  |
| DG | Decanoic Acid | UGT8     | 22.373  |
| DG | Decanoic Acid | ACSS1    | 22.373  |
| DG | Decanoic Acid | CRACR2A  | 22.373  |
| DG | Decanoic Acid | ILVBL    | 22.373  |
| DG | Decanoic Acid | OGDHL    | 22.373  |
| DG | Decanoic Acid | ACADM    | 22.373  |
| DG | Decanoic Acid | EGLN1    | 22.373  |
| DG | Decanoic Acid | CTNNB1   | 22.373  |
| DG | Decanoic Acid | HAP1     | 22.373  |
| DG | Decanoic Acid | DHRS9    | 22.373  |
| DG | Decanoic Acid | SLC25A13 | 22.373  |
| DG | Decanoic Acid | NFX1     | 22.373  |
| DG | Decanoic Acid | SCN2B    | 122.778 |
| DG | Decanoic Acid | COX6C    | 122.778 |
| DG | Decanoic Acid | AKR1C2   | 122.778 |
| DG | Decanoic Acid | SCN2A    | 122.778 |
| DG | Decanoic Acid | FECH     | 122.778 |
| DG | Decanoic Acid | SCN9A    | 122.778 |
| DG | Decanoic Acid | FABP6    | 122.778 |
| DG | Decanoic Acid | SCN1B    | 122.778 |
| DG | Decanoic Acid | NR1H4    | 122.778 |
| DG | Decanoic Acid | HSD17B6  | 80.882  |
| DG | Decanoic Acid | PLOD1    | 80.882  |
| DG | Decanoic Acid | SDHB     | 80.882  |
| DG | Decanoic Acid | P3H2     | 80.882  |
| DG | Decanoic Acid | P3H1     | 80.882  |
| DG | Decanoic Acid | ACO2     | 55.444  |
| DG | Decanoic Acid | SALL1    | 55.444  |
| DG | Decanoic Acid | SLC13A5  | 55.444  |
| DG | Decanoic Acid | CACNA1A  | 48      |
| DG | Decanoic Acid | PLG      | 48      |
| DG | Decanoic Acid | KARS     | 48      |
| DG | Decanoic Acid | ADORA1   | 48      |

|    |                             |         |        |
|----|-----------------------------|---------|--------|
| DG | Decanoic Acid               | FBXO45  | 22.373 |
| DG | Decanoic Acid               | ARV1    | 22.373 |
| DG | Decanoic Acid               | MRPS36  | 22.373 |
| DG | Decanoic Acid               | BCKDK   | 22.373 |
| DG | Decanoic Acid               | HSD17B2 | 22.373 |
| DG | Decanoic Acid               | EPO     | 22.373 |
| DG | Decanoic Acid               | CLN3    | 22.373 |
| DG | Decanoic Acid               | PLCG2   | 22.373 |
| DG | Decanoic Acid               | BCKDHA  | 22.373 |
| DG | Decanoic Acid               | GAL3ST1 | 22.373 |
| DG | Decanoic Acid               | NEDD4L  | 22.373 |
| DG | Decanoic Acid               | SRD5A3  | 22.373 |
| DG | Decanoic Acid               | ETHE1   | 22.373 |
| DG | Decanoic Acid               | CYP4B1  | 22.373 |
| DG | Decanoic Acid               | HSD17B1 | 22.373 |
| DG | Decanoic Acid               | CAV3    | 22.373 |
| DG | Decanoic Acid               | KCNA5   | 22.373 |
| DG | Decanoic Acid               | SQRDL   | 22.373 |
| DG | Decanoic Acid               | ETFDH   | 22.373 |
| DG | Decanoic Acid               | P4HA3   | 22.373 |
| DG | Decanoic Acid               | PCSK9   | 22.373 |
| DG | Decanoic Acid               | GPR143  | 22.373 |
| DG | Decanoic Acid               | SFXN5   | 22.373 |
| DG | Decanoic Acid               | DBT     | 22.373 |
| DG | 12-O-Nicotinoylisolineolone | PTGER4  | 23     |
| DG | 12-O-Nicotinoylisolineolone | PRKCA   | 23     |
| DG | 12-O-Nicotinoylisolineolone | PTGER2  | 23     |
| DG | 12-O-Nicotinoylisolineolone | PTGER3  | 23     |
| DG | 12-O-Nicotinoylisolineolone | PRKCD   | 23     |
| DG | Dihydropinosylin            | GABRA2  | 80.882 |
| DG | Dihydropinosylin            | TNF     | 80.882 |
| DG | Dihydropinosylin            | GABRP   | 80.882 |
| DG | Dihydropinosylin            | GABRQ   | 80.882 |
| DG | Dihydropinosylin            | PDE4B   | 80.882 |
| DG | Dihydropinosylin            | COLQ    | 55.444 |
| DG | Dihydropinosylin            | OPRK1   | 48     |
| DG | Dihydropinosylin            | SLC6A2  | 48     |
| DG | Dihydropinosylin            | APOA2   | 22.373 |
| DG | Dihydropinosylin            | HPX     | 22.373 |
| DG | Dihydropinosylin            | SIX3    | 22.373 |
| DG | Dihydropinosylin            | LILRB1  | 22.373 |
| DG | Dihydropinosylin            | MAP2K5  | 22.373 |
| DG | Dihydropinosylin            | FGF10   | 22.373 |
| DG | Dihydropinosylin            | FADD    | 22.373 |
| DG | Dihydropinosylin            | YBX3    | 22.373 |
| DG | Dihydropinosylin            | WNT2B   | 22.373 |
| DG | Dihydropinosylin            | TIRAP   | 22.373 |
| DG | Dihydropinosylin            | ENPP6   | 22.373 |
| DG | Dihydropinosylin            | IL6     | 22.373 |
| DG | Dihydropinosylin            | NOD2    | 22.373 |
| DG | Dihydropinosylin            | IL4     | 22.373 |

|    |                   |         |        |
|----|-------------------|---------|--------|
| DG | Dihydropinosylvin | CHKA    | 22.373 |
| DG | Dihydropinosylvin | FAS     | 22.373 |
| DG | Dihydropinosylvin | GABRD   | 80.882 |
| DG | Dihydropinosylvin | GABRE   | 80.882 |
| DG | Dihydropinosylvin | GABRA4  | 80.882 |
| DG | Dihydropinosylvin | GABRB3  | 80.882 |
| DG | Dihydropinosylvin | BCHE    | 80.882 |
| DG | Dihydropinosylvin | LTA     | 55.444 |
| DG | Dihydropinosylvin | SLC6A4  | 48     |
| DG | Dihydropinosylvin | SCN1A   | 23     |
| DG | Dihydropinosylvin | SLC5A7  | 22.373 |
| DG | Dihydropinosylvin | SIRT2   | 22.373 |
| DG | Dihydropinosylvin | HCN4    | 22.373 |
| DG | Dihydropinosylvin | NCKAP1L | 22.373 |
| DG | Dihydropinosylvin | EIF2AK1 | 22.373 |
| DG | Dihydropinosylvin | PRSS12  | 22.373 |
| DG | Dihydropinosylvin | FGFR2   | 22.373 |
| DG | Dihydropinosylvin | IL1RN   | 22.373 |
| DG | Dihydropinosylvin | IFNG    | 22.373 |
| DG | Dihydropinosylvin | ROCK2   | 22.373 |
| DG | Dihydropinosylvin | CAMK2D  | 22.373 |
| DG | Dihydropinosylvin | ROCK1   | 22.373 |
| DG | Dihydropinosylvin | BMP4    | 22.373 |
| DG | Dihydropinosylvin | AGRN    | 22.373 |
| DG | Dihydropinosylvin | PDE2A   | 22.373 |
| DG | Dihydropinosylvin | GRIN1   | 22.373 |
| DG | Dihydropinosylvin | PDE3A   | 80.882 |
| DG | Dihydropinosylvin | SCN2A   | 80.882 |
| DG | Dihydropinosylvin | GABRB2  | 80.882 |
| DG | Dihydropinosylvin | GABRA5  | 80.882 |
| DG | Dihydropinosylvin | GABRG2  | 80.882 |
| DG | Dihydropinosylvin | RXRA    | 55.444 |
| DG | Dihydropinosylvin | OPRM1   | 48     |
| DG | Dihydropinosylvin | SCN3A   | 23     |
| DG | Dihydropinosylvin | SEMA4D  | 22.373 |
| DG | Dihydropinosylvin | MIF     | 22.373 |
| DG | Dihydropinosylvin | FASLG   | 22.373 |
| DG | Dihydropinosylvin | CRP     | 22.373 |
| DG | Dihydropinosylvin | IL1B    | 22.373 |
| DG | Dihydropinosylvin | SLC44A4 | 22.373 |
| DG | Dihydropinosylvin | ANGPT1  | 22.373 |
| DG | Dihydropinosylvin | PLN     | 22.373 |
| DG | Dihydropinosylvin | HRC     | 22.373 |
| DG | Dihydropinosylvin | ADIRF   | 22.373 |
| DG | Dihydropinosylvin | IL10    | 22.373 |
| DG | Dihydropinosylvin | FNTA    | 22.373 |
| DG | Dihydropinosylvin | AHCY    | 22.373 |
| DG | Dihydropinosylvin | IKBKB   | 22.373 |
| DG | Dihydropinosylvin | CHDH    | 22.373 |
| DG | Dihydropinosylvin | HCN2    | 22.373 |
| DG | Dihydropinosylvin | GABRB1  | 80.882 |

|    |                   |         |        |
|----|-------------------|---------|--------|
| DG | Dihydropinosylvin | GABRA3  | 80.882 |
| DG | Dihydropinosylvin | ACHE    | 80.882 |
| DG | Dihydropinosylvin | GABRA6  | 80.882 |
| DG | Dihydropinosylvin | PDE3B   | 55.444 |
| DG | Dihydropinosylvin | ADRA1A  | 48     |
| DG | Dihydropinosylvin | ALOX5   | 48     |
| DG | Dihydropinosylvin | HMGA2   | 22.373 |
| DG | Dihydropinosylvin | NRG1    | 22.373 |
| DG | Dihydropinosylvin | DMGDH   | 22.373 |
| DG | Dihydropinosylvin | LGALS3  | 22.373 |
| DG | Dihydropinosylvin | TLR3    | 22.373 |
| DG | Dihydropinosylvin | SHH     | 22.373 |
| DG | Dihydropinosylvin | ADORA2B | 22.373 |
| DG | Dihydropinosylvin | AURKA   | 22.373 |
| DG | Dihydropinosylvin | DNM3    | 22.373 |
| DG | Dihydropinosylvin | TGFB2   | 22.373 |
| DG | Dihydropinosylvin | BDKRB2  | 22.373 |
| DG | Dihydropinosylvin | CDH8    | 22.373 |
| DG | Dihydropinosylvin | HPN     | 22.373 |
| DG | Dihydropinosylvin | APOA1   | 22.373 |
| DG | Dihydropinosylvin | IDO1    | 22.373 |
| DG | Dihydropinosylvin | SOX9    | 22.373 |
| DG | Dihydropinosylvin | GABRG3  | 80.882 |
| DG | Dihydropinosylvin | GABRG1  | 80.882 |
| DG | Dihydropinosylvin | SCN4A   | 80.882 |
| DG | Dihydropinosylvin | GABRA1  | 80.882 |
| DG | Dihydropinosylvin | PDE4D   | 55.444 |
| DG | Dihydropinosylvin | OPRD1   | 48     |
| DG | Dihydropinosylvin | HTR3A   | 48     |
| DG | Dihydropinosylvin | PDE5A   | 22.373 |
| DG | Dihydropinosylvin | CD74    | 22.373 |
| DG | Dihydropinosylvin | NKX3-1  | 22.373 |
| DG | Dihydropinosylvin | KLF4    | 22.373 |
| DG | Dihydropinosylvin | EPO     | 22.373 |
| DG | Dihydropinosylvin | RIPK1   | 22.373 |
| DG | Dihydropinosylvin | ALDH7A1 | 22.373 |
| DG | Dihydropinosylvin | WNT2    | 22.373 |
| DG | Dihydropinosylvin | FCER2   | 22.373 |
| DG | Dihydropinosylvin | RAPGEF2 | 22.373 |
| DG | Dihydropinosylvin | ASCL1   | 22.373 |
| DG | Dihydropinosylvin | NCOA1   | 22.373 |
| DG | Dihydropinosylvin | KMT2A   | 22.373 |
| DG | Dihydropinosylvin | ARHGEF2 | 22.373 |
| DG | Dihydropinosylvin | CTNNB1  | 22.373 |
| DG | Dihydropinosylvin | CAMK2G  | 22.373 |
| DG | Angelicide        | AGTR1   | 23     |
| DG | Angelicide        | ACTN2   | 22.373 |
| DG | Bicycloelemene    | KCND1   | 80.882 |
| DG | Bicycloelemene    | GAMT    | 80.882 |
| DG | Bicycloelemene    | CAT     | 80.882 |
| DG | Bicycloelemene    | KCNC1   | 80.882 |

|    |                |         |        |
|----|----------------|---------|--------|
| DG | Bicycloelemene | KCND2   | 80.882 |
| DG | Bicycloelemene | KCND3   | 80.882 |
| DG | Bicycloelemene | KCNQ1   | 55.444 |
| DG | Bicycloelemene | RDH13   | 48     |
| DG | Bicycloelemene | ESR1    | 48     |
| DG | Bicycloelemene | RXRG    | 48     |
| DG | Bicycloelemene | RLBP1   | 48     |
| DG | Bicycloelemene | LRAT    | 48     |
| DG | Bicycloelemene | DGKI    | 22.373 |
| DG | Bicycloelemene | LRRC4B  | 22.373 |
| DG | Bicycloelemene | ACY3    | 22.373 |
| DG | Bicycloelemene | MAGI2   | 22.373 |
| DG | Bicycloelemene | RAB3A   | 22.373 |
| DG | Bicycloelemene | CYP11A1 | 22.373 |
| DG | Bicycloelemene | RNASE8  | 22.373 |
| DG | Bicycloelemene | SNTG2   | 22.373 |
| DG | Bicycloelemene | NLGN1   | 22.373 |
| DG | Bicycloelemene | KCNE5   | 22.373 |
| DG | Bicycloelemene | ZPR1    | 22.373 |
| DG | Bicycloelemene | PAX7    | 22.373 |
| DG | Bicycloelemene | ADH4    | 22.373 |
| DG | Bicycloelemene | ACY1    | 22.373 |
| DG | Bicycloelemene | KCNA3   | 80.882 |
| DG | Bicycloelemene | KCNC3   | 80.882 |
| DG | Bicycloelemene | KCNB1   | 80.882 |
| DG | Bicycloelemene | ADH1C   | 80.882 |
| DG | Bicycloelemene | ALDH2   | 80.882 |
| DG | Bicycloelemene | GUCY1B3 | 55.444 |
| DG | Bicycloelemene | RDH11   | 48     |
| DG | Bicycloelemene | DHRS3   | 48     |
| DG | Bicycloelemene | RARG    | 48     |
| DG | Bicycloelemene | RDH12   | 48     |
| DG | Bicycloelemene | RDH14   | 48     |
| DG | Bicycloelemene | RXRA    | 48     |
| DG | Bicycloelemene | ADH7    | 22.373 |
| DG | Bicycloelemene | AQP8    | 22.373 |
| DG | Bicycloelemene | ASPA    | 22.373 |
| DG | Bicycloelemene | APOE    | 22.373 |
| DG | Bicycloelemene | MC4R    | 22.373 |
| DG | Bicycloelemene | SCN5A   | 22.373 |
| DG | Bicycloelemene | KCNIP2  | 22.373 |
| DG | Bicycloelemene | SCGB1A1 | 22.373 |
| DG | Bicycloelemene | CACNA1D | 22.373 |
| DG | Bicycloelemene | PPARD   | 22.373 |
| DG | Bicycloelemene | ALDH3B1 | 22.373 |
| DG | Bicycloelemene | ALDH3B2 | 22.373 |
| DG | Bicycloelemene | GJA5    | 22.373 |
| DG | Bicycloelemene | PRKAB1  | 80.882 |
| DG | Bicycloelemene | KCNA1   | 80.882 |
| DG | Bicycloelemene | ADH1B   | 80.882 |
| DG | Bicycloelemene | KCNB2   | 80.882 |

|    |                |         |        |
|----|----------------|---------|--------|
| DG | Bicycloelemene | KCNA4   | 80.882 |
| DG | Bicycloelemene | GATM    | 55.444 |
| DG | Bicycloelemene | RXRB    | 48     |
| DG | Bicycloelemene | RDH5    | 48     |
| DG | Bicycloelemene | PGR     | 48     |
| DG | Bicycloelemene | DHRS4   | 48     |
| DG | Bicycloelemene | RARA    | 48     |
| DG | Bicycloelemene | ALDH1A2 | 48     |
| DG | Bicycloelemene | NFIB    | 22.373 |
| DG | Bicycloelemene | ARX     | 22.373 |
| DG | Bicycloelemene | NRXN1   | 22.373 |
| DG | Bicycloelemene | SOX15   | 22.373 |
| DG | Bicycloelemene | IL1B    | 22.373 |
| DG | Bicycloelemene | SCN10A  | 22.373 |
| DG | Bicycloelemene | GPX7    | 22.373 |
| DG | Bicycloelemene | OXTR    | 22.373 |
| DG | Bicycloelemene | RAPGEF2 | 22.373 |
| DG | Bicycloelemene | NKX2-1  | 22.373 |
| DG | Bicycloelemene | NPPA    | 22.373 |
| DG | Bicycloelemene | RNASE2  | 22.373 |
| DG | Bicycloelemene | FAS     | 22.373 |
| DG | Bicycloelemene | ADH1A   | 80.882 |
| DG | Bicycloelemene | KCNA2   | 80.882 |
| DG | Bicycloelemene | DLG4    | 80.882 |
| DG | Bicycloelemene | KCNA5   | 80.882 |
| DG | Bicycloelemene | KCNA7   | 80.882 |
| DG | Bicycloelemene | KCNK4   | 55.444 |
| DG | Bicycloelemene | RBP3    | 48     |
| DG | Bicycloelemene | RARRES1 | 48     |
| DG | Bicycloelemene | RARB    | 48     |
| DG | Bicycloelemene | RBP1    | 48     |
| DG | Bicycloelemene | RDH8    | 48     |
| DG | Bicycloelemene | VDR     | 48     |
| DG | Bicycloelemene | CYGB    | 22.373 |
| DG | Bicycloelemene | IGF1    | 22.373 |
| DG | Bicycloelemene | EDN1    | 22.373 |
| DG | Bicycloelemene | CNTNAP4 | 22.373 |
| DG | Bicycloelemene | GRIN2A  | 22.373 |
| DG | Bicycloelemene | SPARC   | 22.373 |
| DG | Bicycloelemene | CRLF1   | 22.373 |
| DG | Bicycloelemene | ALDH1B1 | 22.373 |
| DG | Bicycloelemene | DARS    | 22.373 |
| DG | Bicycloelemene | MIP     | 22.373 |
| DG | Bicycloelemene | STX1A   | 22.373 |
| DG | Bicycloelemene | NRXN2   | 22.373 |
| DG | Bicycloelemene | DAB2IP  | 22.373 |
| DG | Bicycloelemene | KCNA10  | 80.882 |
| DG | Bicycloelemene | TPO     | 80.882 |
| DG | Bicycloelemene | KCNC2   | 80.882 |
| DG | Bicycloelemene | RNASE1  | 80.882 |
| DG | Bicycloelemene | KCNA6   | 80.882 |



|    |                |         |        |
|----|----------------|---------|--------|
| DG | Bicycloelemene | IYD     | 55.444 |
| DG | Bicycloelemene | RETSAT  | 48     |
| DG | Bicycloelemene | NR0B1   | 48     |
| DG | Bicycloelemene | ALDH1A3 | 48     |
| DG | Bicycloelemene | ALDH1A1 | 48     |
| DG | Bicycloelemene | GPRC5A  | 48     |
| DG | Bicycloelemene | FBP1    | 22.373 |
| DG | Bicycloelemene | NRXN3   | 22.373 |
| DG | Bicycloelemene | SHANK3  | 22.373 |
| DG | Bicycloelemene | OXT     | 22.373 |
| DG | Bicycloelemene | RNASE4  | 22.373 |
| DG | Bicycloelemene | SLC17A7 | 22.373 |
| DG | Bicycloelemene | SORCS3  | 22.373 |
| DG | Bicycloelemene | FADD    | 22.373 |
| DG | Bicycloelemene | LEP     | 22.373 |
| DG | Bicycloelemene | ANK3    | 22.373 |
| DG | Bicycloelemene | RYR3    | 22.373 |
| DG | Bicycloelemene | PAXBP1  | 22.373 |
| DG | Bicycloelemene | ADORA1  | 22.373 |
| DG | Bicycloelemene | CYP2E1  | 22.373 |
| DG | Alloocimene    | KCND1   | 80.882 |
| DG | Alloocimene    | GAMT    | 80.882 |
| DG | Alloocimene    | CAT     | 80.882 |
| DG | Alloocimene    | KCNC1   | 80.882 |
| DG | Alloocimene    | KCND2   | 80.882 |
| DG | Alloocimene    | KCND3   | 80.882 |
| DG | Alloocimene    | KCNQ1   | 55.444 |
| DG | Alloocimene    | CYGB    | 22.373 |
| DG | Alloocimene    | IGF1    | 22.373 |
| DG | Alloocimene    | EDN1    | 22.373 |
| DG | Alloocimene    | CNTNAP4 | 22.373 |
| DG | Alloocimene    | GRIN2A  | 22.373 |
| DG | Alloocimene    | SPARC   | 22.373 |
| DG | Alloocimene    | CRLF1   | 22.373 |
| DG | Alloocimene    | ALDH1B1 | 22.373 |
| DG | Alloocimene    | DARS    | 22.373 |
| DG | Alloocimene    | MIP     | 22.373 |
| DG | Alloocimene    | STX1A   | 22.373 |
| DG | Alloocimene    | NRXN2   | 22.373 |
| DG | Alloocimene    | DAB2IP  | 22.373 |
| DG | Alloocimene    | KCNA3   | 80.882 |
| DG | Alloocimene    | PRKAB1  | 80.882 |
| DG | Alloocimene    | ADH1A   | 80.882 |
| DG | Alloocimene    | KCNA10  | 80.882 |
| DG | Alloocimene    | KCNC3   | 80.882 |
| DG | Alloocimene    | KCNB1   | 80.882 |
| DG | Alloocimene    | ADH1C   | 80.882 |
| DG | Alloocimene    | ALDH2   | 80.882 |
| DG | Alloocimene    | GUCY1B3 | 55.444 |
| DG | Alloocimene    | FBP1    | 22.373 |
| DG | Alloocimene    | NRXN3   | 22.373 |

|    |             |         |        |
|----|-------------|---------|--------|
| DG | Alloocimene | SHANK3  | 22.373 |
| DG | Alloocimene | OXT     | 22.373 |
| DG | Alloocimene | RNASE4  | 22.373 |
| DG | Alloocimene | SLC17A7 | 22.373 |
| DG | Alloocimene | SORCS3  | 22.373 |
| DG | Alloocimene | FADD    | 22.373 |
| DG | Alloocimene | LEP     | 22.373 |
| DG | Alloocimene | ANK3    | 22.373 |
| DG | Alloocimene | RYR3    | 22.373 |
| DG | Alloocimene | PAXBP1  | 22.373 |
| DG | Alloocimene | ADORA1  | 22.373 |
| DG | Alloocimene | CYP2E1  | 22.373 |
| DG | Alloocimene | KCNA1   | 80.882 |
| DG | Alloocimene | ADH1B   | 80.882 |
| DG | Alloocimene | KCNB2   | 80.882 |
| DG | Alloocimene | KCNA4   | 80.882 |
| DG | Alloocimene | GATM    | 55.444 |
| DG | Alloocimene | DGKI    | 22.373 |
| DG | Alloocimene | LRRC4B  | 22.373 |
| DG | Alloocimene | ACY3    | 22.373 |
| DG | Alloocimene | MAGI2   | 22.373 |
| DG | Alloocimene | RAB3A   | 22.373 |
| DG | Alloocimene | CYP11A1 | 22.373 |
| DG | Alloocimene | RNASE8  | 22.373 |
| DG | Alloocimene | SNTG2   | 22.373 |
| DG | Alloocimene | NLGN1   | 22.373 |
| DG | Alloocimene | KCNE5   | 22.373 |
| DG | Alloocimene | ZPR1    | 22.373 |
| DG | Alloocimene | PAX7    | 22.373 |
| DG | Alloocimene | ADH4    | 22.373 |
| DG | Alloocimene | ACY1    | 22.373 |
| DG | Alloocimene | KCNA2   | 80.882 |
| DG | Alloocimene | DLG4    | 80.882 |
| DG | Alloocimene | KCNA5   | 80.882 |
| DG | Alloocimene | KCNA7   | 80.882 |
| DG | Alloocimene | KCNK4   | 55.444 |
| DG | Alloocimene | ADH7    | 22.373 |
| DG | Alloocimene | AQP8    | 22.373 |
| DG | Alloocimene | ASPA    | 22.373 |
| DG | Alloocimene | APOE    | 22.373 |
| DG | Alloocimene | MC4R    | 22.373 |
| DG | Alloocimene | SCN5A   | 22.373 |
| DG | Alloocimene | KCNIP2  | 22.373 |
| DG | Alloocimene | SCGB1A1 | 22.373 |
| DG | Alloocimene | CACNA1D | 22.373 |
| DG | Alloocimene | PPARD   | 22.373 |
| DG | Alloocimene | ALDH3B1 | 22.373 |
| DG | Alloocimene | ALDH3B2 | 22.373 |
| DG | Alloocimene | GJA5    | 22.373 |
| DG | Alloocimene | TPO     | 80.882 |
| DG | Alloocimene | KCNC2   | 80.882 |

|    |                                     |         |        |
|----|-------------------------------------|---------|--------|
| DG | Alloocimene                         | RNASE1  | 80.882 |
| DG | Alloocimene                         | KCNA6   | 80.882 |
| DG | Alloocimene                         | IYD     | 55.444 |
| DG | Alloocimene                         | NFIB    | 22.373 |
| DG | Alloocimene                         | ARX     | 22.373 |
| DG | Alloocimene                         | NRXN1   | 22.373 |
| DG | Alloocimene                         | SOX15   | 22.373 |
| DG | Alloocimene                         | IL1B    | 22.373 |
| DG | Alloocimene                         | SCN10A  | 22.373 |
| DG | Alloocimene                         | GPX7    | 22.373 |
| DG | Alloocimene                         | OXTR    | 22.373 |
| DG | Alloocimene                         | RAPGEF2 | 22.373 |
| DG | Alloocimene                         | NKX2-1  | 22.373 |
| DG | Alloocimene                         | NPPA    | 22.373 |
| DG | Alloocimene                         | RNASE2  | 22.373 |
| DG | Alloocimene                         | FAS     | 22.373 |
| DG | 1-Methyl-2-Dodecyl-4-(1h)-Quinolone | HTR4    | 80.882 |
| DG | 1-Methyl-2-Dodecyl-4-(1h)-Quinolone | NQO2    | 80.882 |
| DG | 1-Methyl-2-Dodecyl-4-(1h)-Quinolone | GGCX    | 80.882 |
| DG | 1-Methyl-2-Dodecyl-4-(1h)-Quinolone | OPRM1   | 80.882 |
| DG | 1-Methyl-2-Dodecyl-4-(1h)-Quinolone | HTR1A   | 80.882 |
| DG | 1-Methyl-2-Dodecyl-4-(1h)-Quinolone | AGTR1   | 80.882 |
| DG | 1-Methyl-2-Dodecyl-4-(1h)-Quinolone | AVP     | 55.444 |
| DG | 1-Methyl-2-Dodecyl-4-(1h)-Quinolone | WLS     | 55.444 |
| DG | 1-Methyl-2-Dodecyl-4-(1h)-Quinolone | PCK1    | 22.373 |
| DG | 1-Methyl-2-Dodecyl-4-(1h)-Quinolone | CSF1    | 22.373 |
| DG | 1-Methyl-2-Dodecyl-4-(1h)-Quinolone | FNDC5   | 22.373 |
| DG | 1-Methyl-2-Dodecyl-4-(1h)-Quinolone | CA7     | 22.373 |
| DG | 1-Methyl-2-Dodecyl-4-(1h)-Quinolone | SLC38A3 | 22.373 |
| DG | 1-Methyl-2-Dodecyl-4-(1h)-Quinolone | RXFP4   | 22.373 |
| DG | 1-Methyl-2-Dodecyl-4-(1h)-Quinolone | MAPK9   | 22.373 |
| DG | 1-Methyl-2-Dodecyl-4-(1h)-Quinolone | MC4R    | 22.373 |
| DG | 1-Methyl-2-Dodecyl-4-(1h)-Quinolone | MTNR1B  | 22.373 |
| DG | 1-Methyl-2-Dodecyl-4-(1h)-Quinolone | MAS1    | 22.373 |
| DG | 1-Methyl-2-Dodecyl-4-(1h)-Quinolone | S1PR2   | 22.373 |
| DG | 1-Methyl-2-Dodecyl-4-(1h)-Quinolone | HEG1    | 22.373 |
| DG | 1-Methyl-2-Dodecyl-4-(1h)-Quinolone | CDH5    | 22.373 |
| DG | 1-Methyl-2-Dodecyl-4-(1h)-Quinolone | KCNK4   | 22.373 |
| DG | 1-Methyl-2-Dodecyl-4-(1h)-Quinolone | SLC6A4  | 22.373 |
| DG | 1-Methyl-2-Dodecyl-4-(1h)-Quinolone | HTR3D   | 22.373 |
| DG | 1-Methyl-2-Dodecyl-4-(1h)-Quinolone | ANAPC2  | 22.373 |
| DG | 1-Methyl-2-Dodecyl-4-(1h)-Quinolone | BICD1   | 22.373 |
| DG | 1-Methyl-2-Dodecyl-4-(1h)-Quinolone | RET     | 22.373 |
| DG | 1-Methyl-2-Dodecyl-4-(1h)-Quinolone | SOD2    | 22.373 |
| DG | 1-Methyl-2-Dodecyl-4-(1h)-Quinolone | STATH   | 22.373 |
| DG | 1-Methyl-2-Dodecyl-4-(1h)-Quinolone | TMBIM6  | 22.373 |
| DG | 1-Methyl-2-Dodecyl-4-(1h)-Quinolone | SNCA    | 22.373 |
| DG | 1-Methyl-2-Dodecyl-4-(1h)-Quinolone | ADORA1  | 22.373 |
| DG | 1-Methyl-2-Dodecyl-4-(1h)-Quinolone | EGFR    | 22.373 |
| DG | 1-Methyl-2-Dodecyl-4-(1h)-Quinolone | CCM2L   | 22.373 |
| DG | 1-Methyl-2-Dodecyl-4-(1h)-Quinolone | GABRA2  | 80.882 |

|    |                                     |          |        |
|----|-------------------------------------|----------|--------|
| DG | 1-Methyl-2-Dodecyl-4-(1h)-Quinolone | HTR1B    | 80.882 |
| DG | 1-Methyl-2-Dodecyl-4-(1h)-Quinolone | F10      | 80.882 |
| DG | 1-Methyl-2-Dodecyl-4-(1h)-Quinolone | AGTR2    | 80.882 |
| DG | 1-Methyl-2-Dodecyl-4-(1h)-Quinolone | PTGS2    | 80.882 |
| DG | 1-Methyl-2-Dodecyl-4-(1h)-Quinolone | VKORC1L1 | 80.882 |
| DG | 1-Methyl-2-Dodecyl-4-(1h)-Quinolone | PAX2     | 55.444 |
| DG | 1-Methyl-2-Dodecyl-4-(1h)-Quinolone | GPR27    | 55.444 |
| DG | 1-Methyl-2-Dodecyl-4-(1h)-Quinolone | ADCY6    | 22.373 |
| DG | 1-Methyl-2-Dodecyl-4-(1h)-Quinolone | IL34     | 22.373 |
| DG | 1-Methyl-2-Dodecyl-4-(1h)-Quinolone | ACIN1    | 22.373 |
| DG | 1-Methyl-2-Dodecyl-4-(1h)-Quinolone | ADRB2    | 22.373 |
| DG | 1-Methyl-2-Dodecyl-4-(1h)-Quinolone | CCL5     | 22.373 |
| DG | 1-Methyl-2-Dodecyl-4-(1h)-Quinolone | METRNL   | 22.373 |
| DG | 1-Methyl-2-Dodecyl-4-(1h)-Quinolone | LILRB1   | 22.373 |
| DG | 1-Methyl-2-Dodecyl-4-(1h)-Quinolone | CYP4F2   | 22.373 |
| DG | 1-Methyl-2-Dodecyl-4-(1h)-Quinolone | PPP1R1B  | 22.373 |
| DG | 1-Methyl-2-Dodecyl-4-(1h)-Quinolone | BMP6     | 22.373 |
| DG | 1-Methyl-2-Dodecyl-4-(1h)-Quinolone | EGR1     | 22.373 |
| DG | 1-Methyl-2-Dodecyl-4-(1h)-Quinolone | AGTRAP   | 22.373 |
| DG | 1-Methyl-2-Dodecyl-4-(1h)-Quinolone | TFPI     | 22.373 |
| DG | 1-Methyl-2-Dodecyl-4-(1h)-Quinolone | SOD1     | 22.373 |
| DG | 1-Methyl-2-Dodecyl-4-(1h)-Quinolone | ARRB1    | 22.373 |
| DG | 1-Methyl-2-Dodecyl-4-(1h)-Quinolone | NEUROD2  | 22.373 |
| DG | 1-Methyl-2-Dodecyl-4-(1h)-Quinolone | WNT11    | 22.373 |
| DG | 1-Methyl-2-Dodecyl-4-(1h)-Quinolone | ACSL4    | 22.373 |
| DG | 1-Methyl-2-Dodecyl-4-(1h)-Quinolone | LRRK2    | 22.373 |
| DG | 1-Methyl-2-Dodecyl-4-(1h)-Quinolone | MC5R     | 22.373 |
| DG | 1-Methyl-2-Dodecyl-4-(1h)-Quinolone | HTR3E    | 22.373 |
| DG | 1-Methyl-2-Dodecyl-4-(1h)-Quinolone | NAPRT    | 22.373 |
| DG | 1-Methyl-2-Dodecyl-4-(1h)-Quinolone | NCK1     | 22.373 |
| DG | 1-Methyl-2-Dodecyl-4-(1h)-Quinolone | ALOX15   | 22.373 |
| DG | 1-Methyl-2-Dodecyl-4-(1h)-Quinolone | CBR1     | 22.373 |
| DG | 1-Methyl-2-Dodecyl-4-(1h)-Quinolone | PROS1    | 80.882 |
| DG | 1-Methyl-2-Dodecyl-4-(1h)-Quinolone | GABRA3   | 80.882 |
| DG | 1-Methyl-2-Dodecyl-4-(1h)-Quinolone | VKORC1   | 80.882 |
| DG | 1-Methyl-2-Dodecyl-4-(1h)-Quinolone | BGLAP    | 80.882 |
| DG | 1-Methyl-2-Dodecyl-4-(1h)-Quinolone | HTR3A    | 80.882 |
| DG | 1-Methyl-2-Dodecyl-4-(1h)-Quinolone | F2       | 80.882 |
| DG | 1-Methyl-2-Dodecyl-4-(1h)-Quinolone | DAB2     | 55.444 |
| DG | 1-Methyl-2-Dodecyl-4-(1h)-Quinolone | SERPINB7 | 55.444 |
| DG | 1-Methyl-2-Dodecyl-4-(1h)-Quinolone | NAMPT    | 22.373 |
| DG | 1-Methyl-2-Dodecyl-4-(1h)-Quinolone | C1QTNF1  | 22.373 |
| DG | 1-Methyl-2-Dodecyl-4-(1h)-Quinolone | ANG      | 22.373 |
| DG | 1-Methyl-2-Dodecyl-4-(1h)-Quinolone | WT1      | 22.373 |
| DG | 1-Methyl-2-Dodecyl-4-(1h)-Quinolone | PLA2R1   | 22.373 |
| DG | 1-Methyl-2-Dodecyl-4-(1h)-Quinolone | PPP1R9B  | 22.373 |
| DG | 1-Methyl-2-Dodecyl-4-(1h)-Quinolone | PKD2     | 22.373 |
| DG | 1-Methyl-2-Dodecyl-4-(1h)-Quinolone | CRHBP    | 22.373 |
| DG | 1-Methyl-2-Dodecyl-4-(1h)-Quinolone | HTN1     | 22.373 |
| DG | 1-Methyl-2-Dodecyl-4-(1h)-Quinolone | MAOB     | 22.373 |
| DG | 1-Methyl-2-Dodecyl-4-(1h)-Quinolone | SERPINF2 | 22.373 |

|    |                                     |          |        |
|----|-------------------------------------|----------|--------|
| DG | 1-Methyl-2-Dodecyl-4-(1h)-Quinolone | BCL2     | 22.373 |
| DG | 1-Methyl-2-Dodecyl-4-(1h)-Quinolone | OXTR     | 22.373 |
| DG | 1-Methyl-2-Dodecyl-4-(1h)-Quinolone | CCS      | 22.373 |
| DG | 1-Methyl-2-Dodecyl-4-(1h)-Quinolone | AIF1     | 22.373 |
| DG | 1-Methyl-2-Dodecyl-4-(1h)-Quinolone | NMUR2    | 22.373 |
| DG | 1-Methyl-2-Dodecyl-4-(1h)-Quinolone | RPS6KA2  | 22.373 |
| DG | 1-Methyl-2-Dodecyl-4-(1h)-Quinolone | CDC20    | 22.373 |
| DG | 1-Methyl-2-Dodecyl-4-(1h)-Quinolone | SOD3     | 22.373 |
| DG | 1-Methyl-2-Dodecyl-4-(1h)-Quinolone | MC3R     | 22.373 |
| DG | 1-Methyl-2-Dodecyl-4-(1h)-Quinolone | DRD5     | 22.373 |
| DG | 1-Methyl-2-Dodecyl-4-(1h)-Quinolone | MECOM    | 22.373 |
| DG | 1-Methyl-2-Dodecyl-4-(1h)-Quinolone | ADIPOQ   | 22.373 |
| DG | 1-Methyl-2-Dodecyl-4-(1h)-Quinolone | ANXA1    | 22.373 |
| DG | 1-Methyl-2-Dodecyl-4-(1h)-Quinolone | HTR3C    | 22.373 |
| DG | 1-Methyl-2-Dodecyl-4-(1h)-Quinolone | PROZ     | 80.882 |
| DG | 1-Methyl-2-Dodecyl-4-(1h)-Quinolone | F7       | 80.882 |
| DG | 1-Methyl-2-Dodecyl-4-(1h)-Quinolone | JUN      | 80.882 |
| DG | 1-Methyl-2-Dodecyl-4-(1h)-Quinolone | PTGS1    | 80.882 |
| DG | 1-Methyl-2-Dodecyl-4-(1h)-Quinolone | GABRA1   | 80.882 |
| DG | 1-Methyl-2-Dodecyl-4-(1h)-Quinolone | AGT      | 55.444 |
| DG | 1-Methyl-2-Dodecyl-4-(1h)-Quinolone | MGP      | 55.444 |
| DG | 1-Methyl-2-Dodecyl-4-(1h)-Quinolone | ACTN2    | 55.444 |
| DG | 1-Methyl-2-Dodecyl-4-(1h)-Quinolone | RGCC     | 22.373 |
| DG | 1-Methyl-2-Dodecyl-4-(1h)-Quinolone | MC2R     | 22.373 |
| DG | 1-Methyl-2-Dodecyl-4-(1h)-Quinolone | CD36     | 22.373 |
| DG | 1-Methyl-2-Dodecyl-4-(1h)-Quinolone | HNF1B    | 22.373 |
| DG | 1-Methyl-2-Dodecyl-4-(1h)-Quinolone | CLDN5    | 22.373 |
| DG | 1-Methyl-2-Dodecyl-4-(1h)-Quinolone | HTR2B    | 22.373 |
| DG | 1-Methyl-2-Dodecyl-4-(1h)-Quinolone | AQP2     | 22.373 |
| DG | 1-Methyl-2-Dodecyl-4-(1h)-Quinolone | CYP11A1  | 22.373 |
| DG | 1-Methyl-2-Dodecyl-4-(1h)-Quinolone | ACE2     | 22.373 |
| DG | 1-Methyl-2-Dodecyl-4-(1h)-Quinolone | SIPA1    | 22.373 |
| DG | 1-Methyl-2-Dodecyl-4-(1h)-Quinolone | SPRY1    | 22.373 |
| DG | 1-Methyl-2-Dodecyl-4-(1h)-Quinolone | GAS6     | 22.373 |
| DG | 1-Methyl-2-Dodecyl-4-(1h)-Quinolone | PPP1R15A | 22.373 |
| DG | 1-Methyl-2-Dodecyl-4-(1h)-Quinolone | UTS2R    | 22.373 |
| DG | 1-Methyl-2-Dodecyl-4-(1h)-Quinolone | BDKRB2   | 22.373 |
| DG | 1-Methyl-2-Dodecyl-4-(1h)-Quinolone | INS      | 22.373 |
| DG | 1-Methyl-2-Dodecyl-4-(1h)-Quinolone | CD47     | 22.373 |
| DG | 1-Methyl-2-Dodecyl-4-(1h)-Quinolone | SPX      | 22.373 |
| DG | 1-Methyl-2-Dodecyl-4-(1h)-Quinolone | THRB     | 22.373 |
| DG | 1-Methyl-2-Dodecyl-4-(1h)-Quinolone | HTR3B    | 22.373 |
| DG | 1-Methyl-2-Dodecyl-4-(1h)-Quinolone | RFK      | 22.373 |
| DG | 1-Methyl-2-Dodecyl-4-(1h)-Quinolone | AGER     | 22.373 |
| DG | 1-Methyl-2-Dodecyl-4-(1h)-Quinolone | CPLX2    | 22.373 |
| DG | 1-Methyl-2-Dodecyl-4-(1h)-Quinolone | UBIAD1   | 22.373 |
| DG | 1-Methyl-2-Dodecyl-4-(1h)-Quinolone | GLRA1    | 22.373 |
| DG | 1-Methyl-2-Dodecyl-4-(1h)-Quinolone | AVPR1A   | 80.882 |
| DG | 1-Methyl-2-Dodecyl-4-(1h)-Quinolone | F9       | 80.882 |
| DG | 1-Methyl-2-Dodecyl-4-(1h)-Quinolone | PROC     | 80.882 |
| DG | 1-Methyl-2-Dodecyl-4-(1h)-Quinolone | AVPR2    | 80.882 |

|    |                                     |          |        |
|----|-------------------------------------|----------|--------|
| DG | 1-Methyl-2-Dodecyl-4-(1h)-Quinolone | NQO1     | 80.882 |
| DG | 1-Methyl-2-Dodecyl-4-(1h)-Quinolone | CBR4     | 55.444 |
| DG | 1-Methyl-2-Dodecyl-4-(1h)-Quinolone | F3       | 55.444 |
| DG | 1-Methyl-2-Dodecyl-4-(1h)-Quinolone | NDRG2    | 22.373 |
| DG | 1-Methyl-2-Dodecyl-4-(1h)-Quinolone | HACD1    | 22.373 |
| DG | 1-Methyl-2-Dodecyl-4-(1h)-Quinolone | UTS2     | 22.373 |
| DG | 1-Methyl-2-Dodecyl-4-(1h)-Quinolone | SDC4     | 22.373 |
| DG | 1-Methyl-2-Dodecyl-4-(1h)-Quinolone | OXT      | 22.373 |
| DG | 1-Methyl-2-Dodecyl-4-(1h)-Quinolone | DCSTAMP  | 22.373 |
| DG | 1-Methyl-2-Dodecyl-4-(1h)-Quinolone | COMT     | 22.373 |
| DG | 1-Methyl-2-Dodecyl-4-(1h)-Quinolone | MC1R     | 22.373 |
| DG | 1-Methyl-2-Dodecyl-4-(1h)-Quinolone | PTGIS    | 22.373 |
| DG | 1-Methyl-2-Dodecyl-4-(1h)-Quinolone | CYP4F11  | 22.373 |
| DG | 1-Methyl-2-Dodecyl-4-(1h)-Quinolone | AMELX    | 22.373 |
| DG | 1-Methyl-2-Dodecyl-4-(1h)-Quinolone | HRH3     | 22.373 |
| DG | 1-Methyl-2-Dodecyl-4-(1h)-Quinolone | CTNNBIP1 | 22.373 |
| DG | 1-Methyl-2-Dodecyl-4-(1h)-Quinolone | PLA2G1B  | 22.373 |
| DG | 1-Methyl-2-Dodecyl-4-(1h)-Quinolone | ACVR2A   | 22.373 |
| DG | 1-Methyl-2-Dodecyl-4-(1h)-Quinolone | HCRT     | 22.373 |
| DG | 1-Methyl-2-Dodecyl-4-(1h)-Quinolone | ACE      | 22.373 |
| DG | 1-Methyl-2-Dodecyl-4-(1h)-Quinolone | ALOX15B  | 22.373 |
| DG | 1-Methyl-2-Dodecyl-4-(1h)-Quinolone | UGT3A2   | 22.373 |
| DG | 1-Methyl-2-Dodecyl-4-(1h)-Quinolone | REN      | 22.373 |
| DG | 1-Methyl-2-Dodecyl-4-(1h)-Quinolone | SPRY2    | 22.373 |
| DG | 1-Methyl-2-Dodecyl-4-(1h)-Quinolone | NCK2     | 22.373 |
| DG | 1-Methyl-2-Dodecyl-4-(1h)-Quinolone | FGA      | 22.373 |
| DG | 1-Methyl-2-Dodecyl-4-(1h)-Quinolone | CA2      | 22.373 |
| DG | 1-Methyl-2-Dodecyl-4-(1h)-Quinolone | AVPR1B   | 22.373 |
| DG | 1-Methyl-2-Dodecyl-4-(1h)-Quinolone | PRDM16   | 22.373 |
| DG | Limonene                            | KCND1    | 80.882 |
| DG | Limonene                            | GAMT     | 80.882 |
| DG | Limonene                            | CAT      | 80.882 |
| DG | Limonene                            | KCNC1    | 80.882 |
| DG | Limonene                            | KCND2    | 80.882 |
| DG | Limonene                            | KCND3    | 80.882 |
| DG | Limonene                            | KCNQ1    | 55.444 |
| DG | Limonene                            | NR3C2    | 48     |
| DG | Limonene                            | CYGB     | 22.373 |
| DG | Limonene                            | IGF1     | 22.373 |
| DG | Limonene                            | EDN1     | 22.373 |
| DG | Limonene                            | CNTNAP4  | 22.373 |
| DG | Limonene                            | GRIN2A   | 22.373 |
| DG | Limonene                            | SPARC    | 22.373 |
| DG | Limonene                            | CRLF1    | 22.373 |
| DG | Limonene                            | ALDH1B1  | 22.373 |
| DG | Limonene                            | DARS     | 22.373 |
| DG | Limonene                            | MIP      | 22.373 |
| DG | Limonene                            | STX1A    | 22.373 |
| DG | Limonene                            | NRXN2    | 22.373 |
| DG | Limonene                            | DAB2IP   | 22.373 |
| DG | Limonene                            | KCNA3    | 80.882 |

|    |          |         |        |
|----|----------|---------|--------|
| DG | Limonene | KCNC3   | 80.882 |
| DG | Limonene | KCNB1   | 80.882 |
| DG | Limonene | ADH1C   | 80.882 |
| DG | Limonene | ALDH2   | 80.882 |
| DG | Limonene | GUCY1B3 | 55.444 |
| DG | Limonene | CYP17A1 | 48     |
| DG | Limonene | FBP1    | 22.373 |
| DG | Limonene | NRXN3   | 22.373 |
| DG | Limonene | SHANK3  | 22.373 |
| DG | Limonene | OXT     | 22.373 |
| DG | Limonene | RNASE4  | 22.373 |
| DG | Limonene | SLC17A7 | 22.373 |
| DG | Limonene | SORCS3  | 22.373 |
| DG | Limonene | FADD    | 22.373 |
| DG | Limonene | LEP     | 22.373 |
| DG | Limonene | ANK3    | 22.373 |
| DG | Limonene | RYR3    | 22.373 |
| DG | Limonene | PAXBP1  | 22.373 |
| DG | Limonene | ADORA1  | 22.373 |
| DG | Limonene | CYP2E1  | 22.373 |
| DG | Limonene | PRKAB1  | 80.882 |
| DG | Limonene | KCNA1   | 80.882 |
| DG | Limonene | ADH1B   | 80.882 |
| DG | Limonene | KCNB2   | 80.882 |
| DG | Limonene | KCNA4   | 80.882 |
| DG | Limonene | GATM    | 55.444 |
| DG | Limonene | ESR1    | 48     |
| DG | Limonene | DGKI    | 22.373 |
| DG | Limonene | LRRC4B  | 22.373 |
| DG | Limonene | ACY3    | 22.373 |
| DG | Limonene | MAGI2   | 22.373 |
| DG | Limonene | RAB3A   | 22.373 |
| DG | Limonene | CYP11A1 | 22.373 |
| DG | Limonene | RNASE8  | 22.373 |
| DG | Limonene | SNTG2   | 22.373 |
| DG | Limonene | NLGN1   | 22.373 |
| DG | Limonene | KCNE5   | 22.373 |
| DG | Limonene | ZPR1    | 22.373 |
| DG | Limonene | PAX7    | 22.373 |
| DG | Limonene | ADH4    | 22.373 |
| DG | Limonene | ACY1    | 22.373 |
| DG | Limonene | ADH1A   | 80.882 |
| DG | Limonene | KCNA2   | 80.882 |
| DG | Limonene | DLG4    | 80.882 |
| DG | Limonene | KCNA5   | 80.882 |
| DG | Limonene | KCNA7   | 80.882 |
| DG | Limonene | KCNK4   | 55.444 |
| DG | Limonene | PGR     | 48     |
| DG | Limonene | ADH7    | 22.373 |
| DG | Limonene | AQP8    | 22.373 |
| DG | Limonene | ASPA    | 22.373 |

|    |                 |         |        |
|----|-----------------|---------|--------|
| DG | Limonene        | APOE    | 22.373 |
| DG | Limonene        | MC4R    | 22.373 |
| DG | Limonene        | SCN5A   | 22.373 |
| DG | Limonene        | KCNIP2  | 22.373 |
| DG | Limonene        | SCGB1A1 | 22.373 |
| DG | Limonene        | CACNA1D | 22.373 |
| DG | Limonene        | PPARD   | 22.373 |
| DG | Limonene        | ALDH3B1 | 22.373 |
| DG | Limonene        | ALDH3B2 | 22.373 |
| DG | Limonene        | GJA5    | 22.373 |
| DG | Limonene        | KCNA10  | 80.882 |
| DG | Limonene        | TPO     | 80.882 |
| DG | Limonene        | KCNC2   | 80.882 |
| DG | Limonene        | RNASE1  | 80.882 |
| DG | Limonene        | KCNA6   | 80.882 |
| DG | Limonene        | IYD     | 55.444 |
| DG | Limonene        | OPRK1   | 48     |
| DG | Limonene        | NFIB    | 22.373 |
| DG | Limonene        | ARX     | 22.373 |
| DG | Limonene        | NRXN1   | 22.373 |
| DG | Limonene        | SOX15   | 22.373 |
| DG | Limonene        | IL1B    | 22.373 |
| DG | Limonene        | SCN10A  | 22.373 |
| DG | Limonene        | GPX7    | 22.373 |
| DG | Limonene        | OXTR    | 22.373 |
| DG | Limonene        | RAPGEF2 | 22.373 |
| DG | Limonene        | NKX2-1  | 22.373 |
| DG | Limonene        | NPPA    | 22.373 |
| DG | Limonene        | RNASE2  | 22.373 |
| DG | Limonene        | FAS     | 22.373 |
| DG | Beta-Bisabolene | KCND1   | 80.882 |
| DG | Beta-Bisabolene | GAMT    | 80.882 |
| DG | Beta-Bisabolene | CAT     | 80.882 |
| DG | Beta-Bisabolene | KCNC1   | 80.882 |
| DG | Beta-Bisabolene | KCND2   | 80.882 |
| DG | Beta-Bisabolene | KCND3   | 80.882 |
| DG | Beta-Bisabolene | KCNQ1   | 55.444 |
| DG | Beta-Bisabolene | NR3C2   | 48     |
| DG | Beta-Bisabolene | CYGB    | 22.373 |
| DG | Beta-Bisabolene | IGF1    | 22.373 |
| DG | Beta-Bisabolene | EDN1    | 22.373 |
| DG | Beta-Bisabolene | CNTNAP4 | 22.373 |
| DG | Beta-Bisabolene | GRIN2A  | 22.373 |
| DG | Beta-Bisabolene | SPARC   | 22.373 |
| DG | Beta-Bisabolene | CRLF1   | 22.373 |
| DG | Beta-Bisabolene | ALDH1B1 | 22.373 |
| DG | Beta-Bisabolene | DARS    | 22.373 |
| DG | Beta-Bisabolene | MIP     | 22.373 |
| DG | Beta-Bisabolene | STX1A   | 22.373 |
| DG | Beta-Bisabolene | NRXN2   | 22.373 |
| DG | Beta-Bisabolene | DAB2IP  | 22.373 |



|    |                 |         |        |
|----|-----------------|---------|--------|
| DG | Beta-Bisabolene | KCNA3   | 80.882 |
| DG | Beta-Bisabolene | KCNC3   | 80.882 |
| DG | Beta-Bisabolene | KCNB1   | 80.882 |
| DG | Beta-Bisabolene | ADH1C   | 80.882 |
| DG | Beta-Bisabolene | ALDH2   | 80.882 |
| DG | Beta-Bisabolene | GUCY1B3 | 55.444 |
| DG | Beta-Bisabolene | CYP17A1 | 48     |
| DG | Beta-Bisabolene | FBP1    | 22.373 |
| DG | Beta-Bisabolene | NRXN3   | 22.373 |
| DG | Beta-Bisabolene | SHANK3  | 22.373 |
| DG | Beta-Bisabolene | OXT     | 22.373 |
| DG | Beta-Bisabolene | RNASE4  | 22.373 |
| DG | Beta-Bisabolene | SLC17A7 | 22.373 |
| DG | Beta-Bisabolene | SORCS3  | 22.373 |
| DG | Beta-Bisabolene | FADD    | 22.373 |
| DG | Beta-Bisabolene | LEP     | 22.373 |
| DG | Beta-Bisabolene | ANK3    | 22.373 |
| DG | Beta-Bisabolene | RYR3    | 22.373 |
| DG | Beta-Bisabolene | PAXBP1  | 22.373 |
| DG | Beta-Bisabolene | ADORA1  | 22.373 |
| DG | Beta-Bisabolene | CYP2E1  | 22.373 |
| DG | Beta-Bisabolene | PRKAB1  | 80.882 |
| DG | Beta-Bisabolene | KCNA1   | 80.882 |
| DG | Beta-Bisabolene | ADH1B   | 80.882 |
| DG | Beta-Bisabolene | KCNB2   | 80.882 |
| DG | Beta-Bisabolene | KCNA4   | 80.882 |
| DG | Beta-Bisabolene | GATM    | 55.444 |
| DG | Beta-Bisabolene | ESR1    | 48     |
| DG | Beta-Bisabolene | DGKI    | 22.373 |
| DG | Beta-Bisabolene | LRRC4B  | 22.373 |
| DG | Beta-Bisabolene | ACY3    | 22.373 |
| DG | Beta-Bisabolene | MAGI2   | 22.373 |
| DG | Beta-Bisabolene | RAB3A   | 22.373 |
| DG | Beta-Bisabolene | CYP11A1 | 22.373 |
| DG | Beta-Bisabolene | RNASE8  | 22.373 |
| DG | Beta-Bisabolene | SNTG2   | 22.373 |
| DG | Beta-Bisabolene | NLGN1   | 22.373 |
| DG | Beta-Bisabolene | KCNE5   | 22.373 |
| DG | Beta-Bisabolene | ZPR1    | 22.373 |
| DG | Beta-Bisabolene | PAX7    | 22.373 |
| DG | Beta-Bisabolene | ADH4    | 22.373 |
| DG | Beta-Bisabolene | ACY1    | 22.373 |
| DG | Beta-Bisabolene | ADH1A   | 80.882 |
| DG | Beta-Bisabolene | KCNA2   | 80.882 |
| DG | Beta-Bisabolene | DLG4    | 80.882 |
| DG | Beta-Bisabolene | KCNA5   | 80.882 |
| DG | Beta-Bisabolene | KCNA7   | 80.882 |
| DG | Beta-Bisabolene | KCNK4   | 55.444 |
| DG | Beta-Bisabolene | PGR     | 48     |
| DG | Beta-Bisabolene | ADH7    | 22.373 |
| DG | Beta-Bisabolene | AQP8    | 22.373 |

|    |                 |         |        |
|----|-----------------|---------|--------|
| DG | Beta-Bisabolene | ASPA    | 22.373 |
| DG | Beta-Bisabolene | APOE    | 22.373 |
| DG | Beta-Bisabolene | MC4R    | 22.373 |
| DG | Beta-Bisabolene | SCN5A   | 22.373 |
| DG | Beta-Bisabolene | KCNIP2  | 22.373 |
| DG | Beta-Bisabolene | SCGB1A1 | 22.373 |
| DG | Beta-Bisabolene | CACNA1D | 22.373 |
| DG | Beta-Bisabolene | PPARD   | 22.373 |
| DG | Beta-Bisabolene | ALDH3B1 | 22.373 |
| DG | Beta-Bisabolene | ALDH3B2 | 22.373 |
| DG | Beta-Bisabolene | GJA5    | 22.373 |
| DG | Beta-Bisabolene | KCNA10  | 80.882 |
| DG | Beta-Bisabolene | TPO     | 80.882 |
| DG | Beta-Bisabolene | KCNC2   | 80.882 |
| DG | Beta-Bisabolene | RNASE1  | 80.882 |
| DG | Beta-Bisabolene | KCNA6   | 80.882 |
| DG | Beta-Bisabolene | IYD     | 55.444 |
| DG | Beta-Bisabolene | OPRK1   | 48     |
| DG | Beta-Bisabolene | NFIB    | 22.373 |
| DG | Beta-Bisabolene | ARX     | 22.373 |
| DG | Beta-Bisabolene | NRXN1   | 22.373 |
| DG | Beta-Bisabolene | SOX15   | 22.373 |
| DG | Beta-Bisabolene | IL1B    | 22.373 |
| DG | Beta-Bisabolene | SCN10A  | 22.373 |
| DG | Beta-Bisabolene | GPX7    | 22.373 |
| DG | Beta-Bisabolene | OXTR    | 22.373 |
| DG | Beta-Bisabolene | RAPGEF2 | 22.373 |
| DG | Beta-Bisabolene | NKX2-1  | 22.373 |
| DG | Beta-Bisabolene | NPPA    | 22.373 |
| DG | Beta-Bisabolene | RNASE2  | 22.373 |
| DG | Beta-Bisabolene | FAS     | 22.373 |
| DG | Alpha-Pinene    | KCND1   | 80.882 |
| DG | Alpha-Pinene    | GAMT    | 80.882 |
| DG | Alpha-Pinene    | CAT     | 80.882 |
| DG | Alpha-Pinene    | KCNC1   | 80.882 |
| DG | Alpha-Pinene    | KCND2   | 80.882 |
| DG | Alpha-Pinene    | KCND3   | 80.882 |
| DG | Alpha-Pinene    | KCNQ1   | 55.444 |
| DG | Alpha-Pinene    | RDH13   | 48     |
| DG | Alpha-Pinene    | ALDH1A3 | 48     |
| DG | Alpha-Pinene    | ALDH1A1 | 48     |
| DG | Alpha-Pinene    | ALDH1A2 | 48     |
| DG | Alpha-Pinene    | NFIB    | 22.373 |
| DG | Alpha-Pinene    | ARX     | 22.373 |
| DG | Alpha-Pinene    | NRXN1   | 22.373 |
| DG | Alpha-Pinene    | SOX15   | 22.373 |
| DG | Alpha-Pinene    | IL1B    | 22.373 |
| DG | Alpha-Pinene    | SCN10A  | 22.373 |
| DG | Alpha-Pinene    | GPX7    | 22.373 |
| DG | Alpha-Pinene    | OXTR    | 22.373 |
| DG | Alpha-Pinene    | RAPGEF2 | 22.373 |

|    |              |         |        |
|----|--------------|---------|--------|
| DG | Alpha-Pinene | NKX2-1  | 22.373 |
| DG | Alpha-Pinene | NPPA    | 22.373 |
| DG | Alpha-Pinene | RNASE2  | 22.373 |
| DG | Alpha-Pinene | FAS     | 22.373 |
| DG | Alpha-Pinene | KCNA3   | 80.882 |
| DG | Alpha-Pinene | KCNC3   | 80.882 |
| DG | Alpha-Pinene | KCNB1   | 80.882 |
| DG | Alpha-Pinene | ADH1C   | 80.882 |
| DG | Alpha-Pinene | ALDH2   | 80.882 |
| DG | Alpha-Pinene | GUCY1B3 | 55.444 |
| DG | Alpha-Pinene | RDH11   | 48     |
| DG | Alpha-Pinene | DHRS3   | 48     |
| DG | Alpha-Pinene | RDH12   | 48     |
| DG | Alpha-Pinene | RLBP1   | 48     |
| DG | Alpha-Pinene | NR3C2   | 48     |
| DG | Alpha-Pinene | CYGB    | 22.373 |
| DG | Alpha-Pinene | IGF1    | 22.373 |
| DG | Alpha-Pinene | EDN1    | 22.373 |
| DG | Alpha-Pinene | CNTNAP4 | 22.373 |
| DG | Alpha-Pinene | GRIN2A  | 22.373 |
| DG | Alpha-Pinene | SPARC   | 22.373 |
| DG | Alpha-Pinene | CRLF1   | 22.373 |
| DG | Alpha-Pinene | ALDH1B1 | 22.373 |
| DG | Alpha-Pinene | DARS    | 22.373 |
| DG | Alpha-Pinene | MIP     | 22.373 |
| DG | Alpha-Pinene | STX1A   | 22.373 |
| DG | Alpha-Pinene | NRXN2   | 22.373 |
| DG | Alpha-Pinene | DAB2IP  | 22.373 |
| DG | Alpha-Pinene | PRKAB1  | 80.882 |
| DG | Alpha-Pinene | KCNA1   | 80.882 |
| DG | Alpha-Pinene | ADH1B   | 80.882 |
| DG | Alpha-Pinene | KCNB2   | 80.882 |
| DG | Alpha-Pinene | KCNA4   | 80.882 |
| DG | Alpha-Pinene | GATM    | 55.444 |
| DG | Alpha-Pinene | RBP3    | 48     |
| DG | Alpha-Pinene | RDH5    | 48     |
| DG | Alpha-Pinene | OPRK1   | 48     |
| DG | Alpha-Pinene | RDH14   | 48     |
| DG | Alpha-Pinene | FBP1    | 22.373 |
| DG | Alpha-Pinene | NRXN3   | 22.373 |
| DG | Alpha-Pinene | SHANK3  | 22.373 |
| DG | Alpha-Pinene | OXT     | 22.373 |
| DG | Alpha-Pinene | RNASE4  | 22.373 |
| DG | Alpha-Pinene | SLC17A7 | 22.373 |
| DG | Alpha-Pinene | SORCS3  | 22.373 |
| DG | Alpha-Pinene | FADD    | 22.373 |
| DG | Alpha-Pinene | LEP     | 22.373 |
| DG | Alpha-Pinene | ANK3    | 22.373 |
| DG | Alpha-Pinene | RYR3    | 22.373 |
| DG | Alpha-Pinene | PAXBP1  | 22.373 |
| DG | Alpha-Pinene | ADORA1  | 22.373 |

|    |              |         |        |
|----|--------------|---------|--------|
| DG | Alpha-Pinene | CYP2E1  | 22.373 |
| DG | Alpha-Pinene | ADH1A   | 80.882 |
| DG | Alpha-Pinene | KCNA2   | 80.882 |
| DG | Alpha-Pinene | DLG4    | 80.882 |
| DG | Alpha-Pinene | KCNA5   | 80.882 |
| DG | Alpha-Pinene | KCNA7   | 80.882 |
| DG | Alpha-Pinene | KCNK4   | 55.444 |
| DG | Alpha-Pinene | RETSAT  | 48     |
| DG | Alpha-Pinene | ESR1    | 48     |
| DG | Alpha-Pinene | DHRS4   | 48     |
| DG | Alpha-Pinene | RDH8    | 48     |
| DG | Alpha-Pinene | DGKI    | 22.373 |
| DG | Alpha-Pinene | LRRC4B  | 22.373 |
| DG | Alpha-Pinene | ACY3    | 22.373 |
| DG | Alpha-Pinene | MAGI2   | 22.373 |
| DG | Alpha-Pinene | RAB3A   | 22.373 |
| DG | Alpha-Pinene | CYP11A1 | 22.373 |
| DG | Alpha-Pinene | RNASE8  | 22.373 |
| DG | Alpha-Pinene | SNTG2   | 22.373 |
| DG | Alpha-Pinene | NLGN1   | 22.373 |
| DG | Alpha-Pinene | KCNE5   | 22.373 |
| DG | Alpha-Pinene | ZPR1    | 22.373 |
| DG | Alpha-Pinene | PAX7    | 22.373 |
| DG | Alpha-Pinene | ADH4    | 22.373 |
| DG | Alpha-Pinene | ACY1    | 22.373 |
| DG | Alpha-Pinene | KCNA10  | 80.882 |
| DG | Alpha-Pinene | TPO     | 80.882 |
| DG | Alpha-Pinene | KCNC2   | 80.882 |
| DG | Alpha-Pinene | RNASE1  | 80.882 |
| DG | Alpha-Pinene | KCNA6   | 80.882 |
| DG | Alpha-Pinene | IYD     | 55.444 |
| DG | Alpha-Pinene | CYP17A1 | 48     |
| DG | Alpha-Pinene | PGR     | 48     |
| DG | Alpha-Pinene | RBP1    | 48     |
| DG | Alpha-Pinene | LRAT    | 48     |
| DG | Alpha-Pinene | ADH7    | 22.373 |
| DG | Alpha-Pinene | AQP8    | 22.373 |
| DG | Alpha-Pinene | ASPA    | 22.373 |
| DG | Alpha-Pinene | APOE    | 22.373 |
| DG | Alpha-Pinene | MC4R    | 22.373 |
| DG | Alpha-Pinene | SCN5A   | 22.373 |
| DG | Alpha-Pinene | KCNIP2  | 22.373 |
| DG | Alpha-Pinene | SCGB1A1 | 22.373 |
| DG | Alpha-Pinene | CACNA1D | 22.373 |
| DG | Alpha-Pinene | PPARD   | 22.373 |
| DG | Alpha-Pinene | ALDH3B1 | 22.373 |
| DG | Alpha-Pinene | ALDH3B2 | 22.373 |
| DG | Alpha-Pinene | GJA5    | 22.373 |
| DG | Naphthalene  | NFKB1   | 23     |
| DG | Naphthalene  | IL5     | 23     |
| DG | Naphthalene  | CYSLTR1 | 23     |

|    |                   |          |         |
|----|-------------------|----------|---------|
| DG | Naphthalene       | TNF      | 23      |
| DG | Naphthalene       | RNASE3   | 23      |
| DG | Naphthalene       | MUC2     | 23      |
| DG | Naphthalene       | TRIB1    | 22.373  |
| DG | Naphthalene       | SDCBP    | 22.373  |
| DG | Naphthalene       | LTA      | 22.373  |
| DG | Naphthalene       | RXRA     | 22.373  |
| DG | Hexadecanoic Acid | AKR1D1   | 686     |
| DG | Hexadecanoic Acid | ABAT     | 122.778 |
| DG | Hexadecanoic Acid | COX5B    | 122.778 |
| DG | Hexadecanoic Acid | SCN7A    | 122.778 |
| DG | Hexadecanoic Acid | COX5A    | 122.778 |
| DG | Hexadecanoic Acid | COX4I1   | 122.778 |
| DG | Hexadecanoic Acid | SCN4A    | 122.778 |
| DG | Hexadecanoic Acid | CES1     | 122.778 |
| DG | Hexadecanoic Acid | COX2     | 122.778 |
| DG | Hexadecanoic Acid | SUCLG2   | 80.882  |
| DG | Hexadecanoic Acid | SLC25A10 | 80.882  |
| DG | Hexadecanoic Acid | SUCNR1   | 80.882  |
| DG | Hexadecanoic Acid | OXCT1    | 80.882  |
| DG | Hexadecanoic Acid | SDHA     | 80.882  |
| DG | Hexadecanoic Acid | DCT      | 55.444  |
| DG | Hexadecanoic Acid | JMJD6    | 55.444  |
| DG | Hexadecanoic Acid | HSD17B11 | 55.444  |
| DG | Hexadecanoic Acid | P4HB     | 55.444  |
| DG | Hexadecanoic Acid | GRIN3B   | 48      |
| DG | Hexadecanoic Acid | CACNA1B  | 48      |
| DG | Hexadecanoic Acid | GRIN3A   | 48      |
| DG | Hexadecanoic Acid | GRIN1    | 48      |
| DG | Hexadecanoic Acid | SIRT1    | 22.373  |
| DG | Hexadecanoic Acid | SIX1     | 22.373  |
| DG | Hexadecanoic Acid | OSBPL8   | 22.373  |
| DG | Hexadecanoic Acid | UBE2B    | 22.373  |
| DG | Hexadecanoic Acid | STIM2    | 22.373  |
| DG | Hexadecanoic Acid | COLGALT1 | 22.373  |
| DG | Hexadecanoic Acid | ARID1A   | 22.373  |
| DG | Hexadecanoic Acid | ACOT4    | 22.373  |
| DG | Hexadecanoic Acid | SLC25A12 | 22.373  |
| DG | Hexadecanoic Acid | CDH11    | 22.373  |
| DG | Hexadecanoic Acid | BDKRB2   | 22.373  |
| DG | Hexadecanoic Acid | SMAD7    | 22.373  |
| DG | Hexadecanoic Acid | WNT10B   | 22.373  |
| DG | Hexadecanoic Acid | STAR     | 22.373  |
| DG | Hexadecanoic Acid | CAMK2D   | 22.373  |
| DG | Hexadecanoic Acid | HTT      | 22.373  |
| DG | Hexadecanoic Acid | TST      | 22.373  |
| DG | Hexadecanoic Acid | TMEM110  | 22.373  |
| DG | Hexadecanoic Acid | EPHA4    | 22.373  |
| DG | Hexadecanoic Acid | EDA      | 22.373  |
| DG | Hexadecanoic Acid | KCNQ1    | 22.373  |
| DG | Hexadecanoic Acid | UGT1A1   | 22.373  |

|    |                   |          |         |
|----|-------------------|----------|---------|
| DG | Hexadecanoic Acid | PLOD2    | 22.373  |
| DG | Hexadecanoic Acid | SLC25A1  | 22.373  |
| DG | Hexadecanoic Acid | TYR      | 686     |
| DG | Hexadecanoic Acid | SCN1A    | 122.778 |
| DG | Hexadecanoic Acid | COX7C    | 122.778 |
| DG | Hexadecanoic Acid | SCN5A    | 122.778 |
| DG | Hexadecanoic Acid | COX3     | 122.778 |
| DG | Hexadecanoic Acid | HDAC9    | 122.778 |
| DG | Hexadecanoic Acid | SCN4B    | 122.778 |
| DG | Hexadecanoic Acid | ACADSB   | 122.778 |
| DG | Hexadecanoic Acid | OGDH     | 122.778 |
| DG | Hexadecanoic Acid | SLC13A2  | 80.882  |
| DG | Hexadecanoic Acid | P3H3     | 80.882  |
| DG | Hexadecanoic Acid | SLC13A3  | 80.882  |
| DG | Hexadecanoic Acid | PLOD3    | 80.882  |
| DG | Hexadecanoic Acid | P4HA2    | 80.882  |
| DG | Hexadecanoic Acid | AKR1C3   | 55.444  |
| DG | Hexadecanoic Acid | SLC13A4  | 55.444  |
| DG | Hexadecanoic Acid | TYRP1    | 55.444  |
| DG | Hexadecanoic Acid | CACNA2D1 | 48      |
| DG | Hexadecanoic Acid | CACNA2D2 | 48      |
| DG | Hexadecanoic Acid | GRIN2C   | 48      |
| DG | Hexadecanoic Acid | SLC7A1   | 48      |
| DG | Hexadecanoic Acid | HDAC1    | 23      |
| DG | Hexadecanoic Acid | SHMT1    | 22.373  |
| DG | Hexadecanoic Acid | BDH1     | 22.373  |
| DG | Hexadecanoic Acid | SPI1     | 22.373  |
| DG | Hexadecanoic Acid | CYP1A2   | 22.373  |
| DG | Hexadecanoic Acid | PKD2     | 22.373  |
| DG | Hexadecanoic Acid | NEDD4    | 22.373  |
| DG | Hexadecanoic Acid | EGLN2    | 22.373  |
| DG | Hexadecanoic Acid | PHGDH    | 22.373  |
| DG | Hexadecanoic Acid | YBX3     | 22.373  |
| DG | Hexadecanoic Acid | CACNA1D  | 22.373  |
| DG | Hexadecanoic Acid | PRPH     | 22.373  |
| DG | Hexadecanoic Acid | PRDM8    | 22.373  |
| DG | Hexadecanoic Acid | OGFOD1   | 22.373  |
| DG | Hexadecanoic Acid | DLST     | 22.373  |
| DG | Hexadecanoic Acid | AP3D1    | 22.373  |
| DG | Hexadecanoic Acid | IL10     | 22.373  |
| DG | Hexadecanoic Acid | SLC1A6   | 22.373  |
| DG | Hexadecanoic Acid | CDC42    | 22.373  |
| DG | Hexadecanoic Acid | OCA2     | 22.373  |
| DG | Hexadecanoic Acid | HACL1    | 22.373  |
| DG | Hexadecanoic Acid | CASQ2    | 22.373  |
| DG | Hexadecanoic Acid | DLD      | 22.373  |
| DG | Hexadecanoic Acid | CYP1A1   | 22.373  |
| DG | Hexadecanoic Acid | SRD5A2   | 686     |
| DG | Hexadecanoic Acid | ESRRG    | 122.778 |
| DG | Hexadecanoic Acid | COX1     | 122.778 |
| DG | Hexadecanoic Acid | SCN10A   | 122.778 |

|    |                   |          |         |
|----|-------------------|----------|---------|
| DG | Hexadecanoic Acid | AR       | 122.778 |
| DG | Hexadecanoic Acid | PLA2G1B  | 122.778 |
| DG | Hexadecanoic Acid | ADH1C    | 122.778 |
| DG | Hexadecanoic Acid | SCN8A    | 122.778 |
| DG | Hexadecanoic Acid | HDAC2    | 122.778 |
| DG | Hexadecanoic Acid | SLC13A1  | 80.882  |
| DG | Hexadecanoic Acid | OXCT2    | 80.882  |
| DG | Hexadecanoic Acid | ASPH     | 80.882  |
| DG | Hexadecanoic Acid | P4HA1    | 80.882  |
| DG | Hexadecanoic Acid | SUCLA2   | 80.882  |
| DG | Hexadecanoic Acid | CRTAP    | 55.444  |
| DG | Hexadecanoic Acid | SDHAF2   | 55.444  |
| DG | Hexadecanoic Acid | HIF1AN   | 55.444  |
| DG | Hexadecanoic Acid | PLAT     | 48      |
| DG | Hexadecanoic Acid | GRIN2A   | 48      |
| DG | Hexadecanoic Acid | GRIN2B   | 48      |
| DG | Hexadecanoic Acid | SLC7A4   | 48      |
| DG | Hexadecanoic Acid | GPD1L    | 22.373  |
| DG | Hexadecanoic Acid | SUGCT    | 22.373  |
| DG | Hexadecanoic Acid | COLGALT2 | 22.373  |
| DG | Hexadecanoic Acid | SUOX     | 22.373  |
| DG | Hexadecanoic Acid | CCL5     | 22.373  |
| DG | Hexadecanoic Acid | ALDH9A1  | 22.373  |
| DG | Hexadecanoic Acid | CYP11A1  | 22.373  |
| DG | Hexadecanoic Acid | ACAT1    | 22.373  |
| DG | Hexadecanoic Acid | PNLIPRP2 | 22.373  |
| DG | Hexadecanoic Acid | 8-Mar    | 22.373  |
| DG | Hexadecanoic Acid | DDC      | 22.373  |
| DG | Hexadecanoic Acid | BCKDHB   | 22.373  |
| DG | Hexadecanoic Acid | UROD     | 22.373  |
| DG | Hexadecanoic Acid | SLC38A7  | 22.373  |
| DG | Hexadecanoic Acid | PF4      | 22.373  |
| DG | Hexadecanoic Acid | MYO5A    | 22.373  |
| DG | Hexadecanoic Acid | EGLN3    | 22.373  |
| DG | Hexadecanoic Acid | NPPA     | 22.373  |
| DG | Hexadecanoic Acid | ARHGEF2  | 22.373  |
| DG | Hexadecanoic Acid | HSD17B8  | 22.373  |
| DG | Hexadecanoic Acid | RYR2     | 22.373  |
| DG | Hexadecanoic Acid | GJA5     | 22.373  |
| DG | Hexadecanoic Acid | GNAS     | 22.373  |
| DG | Hexadecanoic Acid | SULT2A1  | 22.373  |
| DG | Hexadecanoic Acid | SCN11A   | 122.778 |
| DG | Hexadecanoic Acid | SCN3B    | 122.778 |
| DG | Hexadecanoic Acid | SCN3A    | 122.778 |
| DG | Hexadecanoic Acid | ALDH5A1  | 122.778 |
| DG | Hexadecanoic Acid | COX7A1   | 122.778 |
| DG | Hexadecanoic Acid | COX6A2   | 122.778 |
| DG | Hexadecanoic Acid | COX6B1   | 122.778 |
| DG | Hexadecanoic Acid | COX7B    | 122.778 |
| DG | Hexadecanoic Acid | COX8A    | 122.778 |
| DG | Hexadecanoic Acid | SUCLG1   | 80.882  |

|    |                   |          |         |
|----|-------------------|----------|---------|
| DG | Hexadecanoic Acid | TMLHE    | 80.882  |
| DG | Hexadecanoic Acid | BBOX1    | 80.882  |
| DG | Hexadecanoic Acid | SDHC     | 80.882  |
| DG | Hexadecanoic Acid | SDHD     | 80.882  |
| DG | Hexadecanoic Acid | SLIT2    | 55.444  |
| DG | Hexadecanoic Acid | SLC1A3   | 55.444  |
| DG | Hexadecanoic Acid | UROS     | 55.444  |
| DG | Hexadecanoic Acid | SLC7A2   | 48      |
| DG | Hexadecanoic Acid | TOP1     | 48      |
| DG | Hexadecanoic Acid | SLC7A3   | 48      |
| DG | Hexadecanoic Acid | GRIN2D   | 48      |
| DG | Hexadecanoic Acid | SRD5A1   | 22.373  |
| DG | Hexadecanoic Acid | ACSS2    | 22.373  |
| DG | Hexadecanoic Acid | SIX4     | 22.373  |
| DG | Hexadecanoic Acid | CCL2     | 22.373  |
| DG | Hexadecanoic Acid | ANK2     | 22.373  |
| DG | Hexadecanoic Acid | TH       | 22.373  |
| DG | Hexadecanoic Acid | DHODH    | 22.373  |
| DG | Hexadecanoic Acid | GALC     | 22.373  |
| DG | Hexadecanoic Acid | CYP39A1  | 22.373  |
| DG | Hexadecanoic Acid | STIM1    | 22.373  |
| DG | Hexadecanoic Acid | DHTKD1   | 22.373  |
| DG | Hexadecanoic Acid | KCNE5    | 22.373  |
| DG | Hexadecanoic Acid | UGT8     | 22.373  |
| DG | Hexadecanoic Acid | ACSS1    | 22.373  |
| DG | Hexadecanoic Acid | CRACR2A  | 22.373  |
| DG | Hexadecanoic Acid | ILVBL    | 22.373  |
| DG | Hexadecanoic Acid | OGDHL    | 22.373  |
| DG | Hexadecanoic Acid | ACADM    | 22.373  |
| DG | Hexadecanoic Acid | EGLN1    | 22.373  |
| DG | Hexadecanoic Acid | CTNNB1   | 22.373  |
| DG | Hexadecanoic Acid | HAP1     | 22.373  |
| DG | Hexadecanoic Acid | DHRS9    | 22.373  |
| DG | Hexadecanoic Acid | SLC25A13 | 22.373  |
| DG | Hexadecanoic Acid | NFX1     | 22.373  |
| DG | Hexadecanoic Acid | SCN2B    | 122.778 |
| DG | Hexadecanoic Acid | COX6C    | 122.778 |
| DG | Hexadecanoic Acid | AKR1C2   | 122.778 |
| DG | Hexadecanoic Acid | SCN2A    | 122.778 |
| DG | Hexadecanoic Acid | FECH     | 122.778 |
| DG | Hexadecanoic Acid | SCN9A    | 122.778 |
| DG | Hexadecanoic Acid | FABP6    | 122.778 |
| DG | Hexadecanoic Acid | SCN1B    | 122.778 |
| DG | Hexadecanoic Acid | NR1H4    | 122.778 |
| DG | Hexadecanoic Acid | HSD17B6  | 80.882  |
| DG | Hexadecanoic Acid | PLOD1    | 80.882  |
| DG | Hexadecanoic Acid | SDHB     | 80.882  |
| DG | Hexadecanoic Acid | P3H2     | 80.882  |
| DG | Hexadecanoic Acid | P3H1     | 80.882  |
| DG | Hexadecanoic Acid | ACO2     | 55.444  |
| DG | Hexadecanoic Acid | SALL1    | 55.444  |



|    |                   |         |         |
|----|-------------------|---------|---------|
| DG | Hexadecanoic Acid | SLC13A5 | 55.444  |
| DG | Hexadecanoic Acid | CACNA1A | 48      |
| DG | Hexadecanoic Acid | PLG     | 48      |
| DG | Hexadecanoic Acid | KARS    | 48      |
| DG | Hexadecanoic Acid | ADORA1  | 48      |
| DG | Hexadecanoic Acid | FBXO45  | 22.373  |
| DG | Hexadecanoic Acid | ARV1    | 22.373  |
| DG | Hexadecanoic Acid | MRPS36  | 22.373  |
| DG | Hexadecanoic Acid | BCKDK   | 22.373  |
| DG | Hexadecanoic Acid | HSD17B2 | 22.373  |
| DG | Hexadecanoic Acid | EPO     | 22.373  |
| DG | Hexadecanoic Acid | CLN3    | 22.373  |
| DG | Hexadecanoic Acid | PLCG2   | 22.373  |
| DG | Hexadecanoic Acid | BCKDHA  | 22.373  |
| DG | Hexadecanoic Acid | GAL3ST1 | 22.373  |
| DG | Hexadecanoic Acid | NEDD4L  | 22.373  |
| DG | Hexadecanoic Acid | SRD5A3  | 22.373  |
| DG | Hexadecanoic Acid | ETHE1   | 22.373  |
| DG | Hexadecanoic Acid | CYP4B1  | 22.373  |
| DG | Hexadecanoic Acid | HSD17B1 | 22.373  |
| DG | Hexadecanoic Acid | CAV3    | 22.373  |
| DG | Hexadecanoic Acid | KCNA5   | 22.373  |
| DG | Hexadecanoic Acid | SQRDL   | 22.373  |
| DG | Hexadecanoic Acid | ETFDH   | 22.373  |
| DG | Hexadecanoic Acid | P4HA3   | 22.373  |
| DG | Hexadecanoic Acid | PCSK9   | 22.373  |
| DG | Hexadecanoic Acid | GPR143  | 22.373  |
| DG | Hexadecanoic Acid | SFXN5   | 22.373  |
| DG | Hexadecanoic Acid | DBT     | 22.373  |
| DG | 6-Undecanol       | TRPV3   | 122.778 |
| DG | 6-Undecanol       | SCN11A  | 48      |
| DG | 6-Undecanol       | SCN3A   | 48      |
| DG | 6-Undecanol       | ALDH5A1 | 48      |
| DG | 6-Undecanol       | SCN4A   | 48      |
| DG | 6-Undecanol       | SCN1B   | 48      |
| DG | 6-Undecanol       | NGFR    | 22.373  |
| DG | 6-Undecanol       | HIF1A   | 22.373  |
| DG | 6-Undecanol       | SMO     | 22.373  |
| DG | 6-Undecanol       | CBFA2T3 | 22.373  |
| DG | 6-Undecanol       | OPRK1   | 122.778 |
| DG | 6-Undecanol       | SCN2B   | 48      |
| DG | 6-Undecanol       | SCN7A   | 48      |
| DG | 6-Undecanol       | SCN2A   | 48      |
| DG | 6-Undecanol       | SCN4B   | 48      |
| DG | 6-Undecanol       | OGDH    | 48      |
| DG | 6-Undecanol       | ADRA2A  | 22.373  |
| DG | 6-Undecanol       | BNIP3   | 22.373  |
| DG | 6-Undecanol       | TACR2   | 22.373  |
| DG | 6-Undecanol       | NEFH    | 22.373  |
| DG | 6-Undecanol       | TRPM8   | 122.778 |
| DG | 6-Undecanol       | ABAT    | 48      |

|    |               |         |         |
|----|---------------|---------|---------|
| DG | 6-Undecanol   | SCN5A   | 48      |
| DG | 6-Undecanol   | HDAC9   | 48      |
| DG | 6-Undecanol   | SRD5A2  | 48      |
| DG | 6-Undecanol   | HDAC2   | 48      |
| DG | 6-Undecanol   | TRPV1   | 22.373  |
| DG | 6-Undecanol   | CRH     | 22.373  |
| DG | 6-Undecanol   | AQP1    | 22.373  |
| DG | 6-Undecanol   | CRHR2   | 22.373  |
| DG | 6-Undecanol   | TRPA1   | 122.778 |
| DG | 6-Undecanol   | SCN1A   | 48      |
| DG | 6-Undecanol   | SCN10A  | 48      |
| DG | 6-Undecanol   | TYR     | 48      |
| DG | 6-Undecanol   | ACADSB  | 48      |
| DG | 6-Undecanol   | ACTN3   | 22.373  |
| DG | 6-Undecanol   | FGF10   | 22.373  |
| DG | 6-Undecanol   | NEFL    | 22.373  |
| DG | 6-Undecanol   | TAC4    | 22.373  |
| DG | 6-Undecanol   | KCNK4   | 55.444  |
| DG | 6-Undecanol   | SCN3B   | 48      |
| DG | 6-Undecanol   | AKR1D1  | 48      |
| DG | 6-Undecanol   | SCN9A   | 48      |
| DG | 6-Undecanol   | SCN8A   | 48      |
| DG | 6-Undecanol   | TAC1    | 22.373  |
| DG | 6-Undecanol   | VCP     | 22.373  |
| DG | 6-Undecanol   | UCN2    | 22.373  |
| DG | 6-Undecanol   | CDH3    | 22.373  |
| DG | M-Ethylphenol | GABRA2  | 80.882  |
| DG | M-Ethylphenol | TNF     | 80.882  |
| DG | M-Ethylphenol | GABRP   | 80.882  |
| DG | M-Ethylphenol | GABRQ   | 80.882  |
| DG | M-Ethylphenol | PDE4B   | 80.882  |
| DG | M-Ethylphenol | COLQ    | 55.444  |
| DG | M-Ethylphenol | SLC6A4  | 48      |
| DG | M-Ethylphenol | DRD3    | 48      |
| DG | M-Ethylphenol | SCN1A   | 23      |
| DG | M-Ethylphenol | SLC5A7  | 22.373  |
| DG | M-Ethylphenol | SIRT2   | 22.373  |
| DG | M-Ethylphenol | HCN4    | 22.373  |
| DG | M-Ethylphenol | NCKAP1L | 22.373  |
| DG | M-Ethylphenol | EIF2AK1 | 22.373  |
| DG | M-Ethylphenol | PRSS12  | 22.373  |
| DG | M-Ethylphenol | FGFR2   | 22.373  |
| DG | M-Ethylphenol | IL1RN   | 22.373  |
| DG | M-Ethylphenol | IFNG    | 22.373  |
| DG | M-Ethylphenol | ROCK2   | 22.373  |
| DG | M-Ethylphenol | CAMK2D  | 22.373  |
| DG | M-Ethylphenol | ROCK1   | 22.373  |
| DG | M-Ethylphenol | BMP4    | 22.373  |
| DG | M-Ethylphenol | AGRN    | 22.373  |
| DG | M-Ethylphenol | PDE2A   | 22.373  |
| DG | M-Ethylphenol | GRIN1   | 22.373  |

|    |               |         |        |
|----|---------------|---------|--------|
| DG | M-Ethylphenol | GABRD   | 80.882 |
| DG | M-Ethylphenol | GABRE   | 80.882 |
| DG | M-Ethylphenol | GABRA4  | 80.882 |
| DG | M-Ethylphenol | GABRB3  | 80.882 |
| DG | M-Ethylphenol | BCHE    | 80.882 |
| DG | M-Ethylphenol | LTA     | 55.444 |
| DG | M-Ethylphenol | DRD4    | 48     |
| DG | M-Ethylphenol | ALOX5   | 48     |
| DG | M-Ethylphenol | SCN3A   | 23     |
| DG | M-Ethylphenol | SEMA4D  | 22.373 |
| DG | M-Ethylphenol | MIF     | 22.373 |
| DG | M-Ethylphenol | FASLG   | 22.373 |
| DG | M-Ethylphenol | CRP     | 22.373 |
| DG | M-Ethylphenol | IL1B    | 22.373 |
| DG | M-Ethylphenol | SLC44A4 | 22.373 |
| DG | M-Ethylphenol | ANGPT1  | 22.373 |
| DG | M-Ethylphenol | PLN     | 22.373 |
| DG | M-Ethylphenol | HRC     | 22.373 |
| DG | M-Ethylphenol | ADIRF   | 22.373 |
| DG | M-Ethylphenol | IL10    | 22.373 |
| DG | M-Ethylphenol | FNTA    | 22.373 |
| DG | M-Ethylphenol | AHCY    | 22.373 |
| DG | M-Ethylphenol | IKBKB   | 22.373 |
| DG | M-Ethylphenol | CHDH    | 22.373 |
| DG | M-Ethylphenol | HCN2    | 22.373 |
| DG | M-Ethylphenol | PDE3A   | 80.882 |
| DG | M-Ethylphenol | SCN2A   | 80.882 |
| DG | M-Ethylphenol | GABRB2  | 80.882 |
| DG | M-Ethylphenol | GABRA5  | 80.882 |
| DG | M-Ethylphenol | GABRG2  | 80.882 |
| DG | M-Ethylphenol | RXRA    | 55.444 |
| DG | M-Ethylphenol | HTR7    | 48     |
| DG | M-Ethylphenol | DRD5    | 48     |
| DG | M-Ethylphenol | HMGA2   | 22.373 |
| DG | M-Ethylphenol | NRG1    | 22.373 |
| DG | M-Ethylphenol | DMGDH   | 22.373 |
| DG | M-Ethylphenol | LGALS3  | 22.373 |
| DG | M-Ethylphenol | TLR3    | 22.373 |
| DG | M-Ethylphenol | SHH     | 22.373 |
| DG | M-Ethylphenol | ADORA2B | 22.373 |
| DG | M-Ethylphenol | AURKA   | 22.373 |
| DG | M-Ethylphenol | DNM3    | 22.373 |
| DG | M-Ethylphenol | TGFB2   | 22.373 |
| DG | M-Ethylphenol | BDKRB2  | 22.373 |
| DG | M-Ethylphenol | CDH8    | 22.373 |
| DG | M-Ethylphenol | HPN     | 22.373 |
| DG | M-Ethylphenol | APOA1   | 22.373 |
| DG | M-Ethylphenol | IDO1    | 22.373 |
| DG | M-Ethylphenol | SOX9    | 22.373 |
| DG | M-Ethylphenol | GABRB1  | 80.882 |
| DG | M-Ethylphenol | GABRA3  | 80.882 |

|    |                   |         |        |
|----|-------------------|---------|--------|
| DG | M-Ethylphenol     | ACHE    | 80.882 |
| DG | M-Ethylphenol     | GABRA6  | 80.882 |
| DG | M-Ethylphenol     | PDE3B   | 55.444 |
| DG | M-Ethylphenol     | SLC6A3  | 48     |
| DG | M-Ethylphenol     | HTR1A   | 48     |
| DG | M-Ethylphenol     | DRD1    | 48     |
| DG | M-Ethylphenol     | PDE5A   | 22.373 |
| DG | M-Ethylphenol     | CD74    | 22.373 |
| DG | M-Ethylphenol     | NKX3-1  | 22.373 |
| DG | M-Ethylphenol     | KLF4    | 22.373 |
| DG | M-Ethylphenol     | EPO     | 22.373 |
| DG | M-Ethylphenol     | RIPK1   | 22.373 |
| DG | M-Ethylphenol     | ALDH7A1 | 22.373 |
| DG | M-Ethylphenol     | WNT2    | 22.373 |
| DG | M-Ethylphenol     | FCER2   | 22.373 |
| DG | M-Ethylphenol     | RAPGEF2 | 22.373 |
| DG | M-Ethylphenol     | ASCL1   | 22.373 |
| DG | M-Ethylphenol     | NCOA1   | 22.373 |
| DG | M-Ethylphenol     | KMT2A   | 22.373 |
| DG | M-Ethylphenol     | ARHGEF2 | 22.373 |
| DG | M-Ethylphenol     | CTNNB1  | 22.373 |
| DG | M-Ethylphenol     | CAMK2G  | 22.373 |
| DG | M-Ethylphenol     | GABRG3  | 80.882 |
| DG | M-Ethylphenol     | GABRG1  | 80.882 |
| DG | M-Ethylphenol     | SCN4A   | 80.882 |
| DG | M-Ethylphenol     | GABRA1  | 80.882 |
| DG | M-Ethylphenol     | PDE4D   | 55.444 |
| DG | M-Ethylphenol     | DRD2    | 48     |
| DG | M-Ethylphenol     | DBH     | 48     |
| DG | M-Ethylphenol     | SLC6A2  | 48     |
| DG | M-Ethylphenol     | APOA2   | 22.373 |
| DG | M-Ethylphenol     | HPX     | 22.373 |
| DG | M-Ethylphenol     | SIX3    | 22.373 |
| DG | M-Ethylphenol     | LILRB1  | 22.373 |
| DG | M-Ethylphenol     | MAP2K5  | 22.373 |
| DG | M-Ethylphenol     | FGF10   | 22.373 |
| DG | M-Ethylphenol     | FADD    | 22.373 |
| DG | M-Ethylphenol     | YBX3    | 22.373 |
| DG | M-Ethylphenol     | WNT2B   | 22.373 |
| DG | M-Ethylphenol     | TIRAP   | 22.373 |
| DG | M-Ethylphenol     | ENPP6   | 22.373 |
| DG | M-Ethylphenol     | IL6     | 22.373 |
| DG | M-Ethylphenol     | NOD2    | 22.373 |
| DG | M-Ethylphenol     | IL4     | 22.373 |
| DG | M-Ethylphenol     | CHKA    | 22.373 |
| DG | M-Ethylphenol     | FAS     | 22.373 |
| DG | Carvacrol Acetate | SCN10A  | 80.882 |
| DG | Carvacrol Acetate | NRG1    | 22.373 |
| DG | Carvacrol Acetate | SCN5A   | 22.373 |
| DG | Carvacrol Acetate | SCN4B   | 22.373 |
| DG | Carvacrol Acetate | FNTA    | 22.373 |

|    |                   |         |        |
|----|-------------------|---------|--------|
| DG | Carvacrol Acetate | GJA5    | 22.373 |
| DG | Carvacrol Acetate | ACHE    | 80.882 |
| DG | Carvacrol Acetate | DMGDH   | 22.373 |
| DG | Carvacrol Acetate | PRSS12  | 22.373 |
| DG | Carvacrol Acetate | ASCL1   | 22.373 |
| DG | Carvacrol Acetate | AGRN    | 22.373 |
| DG | Carvacrol Acetate | GRIN1   | 22.373 |
| DG | Carvacrol Acetate | BCHE    | 80.882 |
| DG | Carvacrol Acetate | SIX3    | 22.373 |
| DG | Carvacrol Acetate | SLC44A4 | 22.373 |
| DG | Carvacrol Acetate | ENPP6   | 22.373 |
| DG | Carvacrol Acetate | CHKA    | 22.373 |
| DG | Carvacrol Acetate | COLQ    | 55.444 |
| DG | Carvacrol Acetate | ANK2    | 22.373 |
| DG | Carvacrol Acetate | ALDH7A1 | 22.373 |
| DG | Carvacrol Acetate | CDH8    | 22.373 |
| DG | Carvacrol Acetate | RYR2    | 22.373 |
| DG | Carvacrol Acetate | SLC5A7  | 22.373 |
| DG | Carvacrol Acetate | CRP     | 22.373 |
| DG | Carvacrol Acetate | DNM3    | 22.373 |
| DG | Carvacrol Acetate | KCNA5   | 22.373 |
| DG | Carvacrol Acetate | CHDH    | 22.373 |
| DG | Alpha-Acoradiene  | KCND1   | 80.882 |
| DG | Alpha-Acoradiene  | GAMT    | 80.882 |
| DG | Alpha-Acoradiene  | CAT     | 80.882 |
| DG | Alpha-Acoradiene  | KCNC1   | 80.882 |
| DG | Alpha-Acoradiene  | KCND2   | 80.882 |
| DG | Alpha-Acoradiene  | KCND3   | 80.882 |
| DG | Alpha-Acoradiene  | KCNQ1   | 55.444 |
| DG | Alpha-Acoradiene  | NR3C2   | 48     |
| DG | Alpha-Acoradiene  | CYGB    | 22.373 |
| DG | Alpha-Acoradiene  | IGF1    | 22.373 |
| DG | Alpha-Acoradiene  | EDN1    | 22.373 |
| DG | Alpha-Acoradiene  | CNTNAP4 | 22.373 |
| DG | Alpha-Acoradiene  | GRIN2A  | 22.373 |
| DG | Alpha-Acoradiene  | SPARC   | 22.373 |
| DG | Alpha-Acoradiene  | CRLF1   | 22.373 |
| DG | Alpha-Acoradiene  | ALDH1B1 | 22.373 |
| DG | Alpha-Acoradiene  | DARS    | 22.373 |
| DG | Alpha-Acoradiene  | MIP     | 22.373 |
| DG | Alpha-Acoradiene  | STX1A   | 22.373 |
| DG | Alpha-Acoradiene  | NRXN2   | 22.373 |
| DG | Alpha-Acoradiene  | DAB2IP  | 22.373 |
| DG | Alpha-Acoradiene  | KCNA3   | 80.882 |
| DG | Alpha-Acoradiene  | KCNC3   | 80.882 |
| DG | Alpha-Acoradiene  | KCNB1   | 80.882 |
| DG | Alpha-Acoradiene  | ADH1C   | 80.882 |
| DG | Alpha-Acoradiene  | ALDH2   | 80.882 |
| DG | Alpha-Acoradiene  | GUCY1B3 | 55.444 |
| DG | Alpha-Acoradiene  | CYP17A1 | 48     |
| DG | Alpha-Acoradiene  | FBP1    | 22.373 |

|    |                  |         |        |
|----|------------------|---------|--------|
| DG | Alpha-Acoradiene | NRXN3   | 22.373 |
| DG | Alpha-Acoradiene | SHANK3  | 22.373 |
| DG | Alpha-Acoradiene | OXT     | 22.373 |
| DG | Alpha-Acoradiene | RNASE4  | 22.373 |
| DG | Alpha-Acoradiene | SLC17A7 | 22.373 |
| DG | Alpha-Acoradiene | SORCS3  | 22.373 |
| DG | Alpha-Acoradiene | FADD    | 22.373 |
| DG | Alpha-Acoradiene | LEP     | 22.373 |
| DG | Alpha-Acoradiene | ANK3    | 22.373 |
| DG | Alpha-Acoradiene | RYR3    | 22.373 |
| DG | Alpha-Acoradiene | PAXBP1  | 22.373 |
| DG | Alpha-Acoradiene | ADORA1  | 22.373 |
| DG | Alpha-Acoradiene | CYP2E1  | 22.373 |
| DG | Alpha-Acoradiene | PRKAB1  | 80.882 |
| DG | Alpha-Acoradiene | KCNA1   | 80.882 |
| DG | Alpha-Acoradiene | ADH1B   | 80.882 |
| DG | Alpha-Acoradiene | KCNB2   | 80.882 |
| DG | Alpha-Acoradiene | KCNA4   | 80.882 |
| DG | Alpha-Acoradiene | GATM    | 55.444 |
| DG | Alpha-Acoradiene | ESR1    | 48     |
| DG | Alpha-Acoradiene | DGKI    | 22.373 |
| DG | Alpha-Acoradiene | LRRC4B  | 22.373 |
| DG | Alpha-Acoradiene | ACY3    | 22.373 |
| DG | Alpha-Acoradiene | MAGI2   | 22.373 |
| DG | Alpha-Acoradiene | RAB3A   | 22.373 |
| DG | Alpha-Acoradiene | CYP11A1 | 22.373 |
| DG | Alpha-Acoradiene | RNASE8  | 22.373 |
| DG | Alpha-Acoradiene | SNTG2   | 22.373 |
| DG | Alpha-Acoradiene | NLGN1   | 22.373 |
| DG | Alpha-Acoradiene | KCNE5   | 22.373 |
| DG | Alpha-Acoradiene | ZPR1    | 22.373 |
| DG | Alpha-Acoradiene | PAX7    | 22.373 |
| DG | Alpha-Acoradiene | ADH4    | 22.373 |
| DG | Alpha-Acoradiene | ACY1    | 22.373 |
| DG | Alpha-Acoradiene | ADH1A   | 80.882 |
| DG | Alpha-Acoradiene | KCNA2   | 80.882 |
| DG | Alpha-Acoradiene | DLG4    | 80.882 |
| DG | Alpha-Acoradiene | KCNA5   | 80.882 |
| DG | Alpha-Acoradiene | KCNA7   | 80.882 |
| DG | Alpha-Acoradiene | KCNK4   | 55.444 |
| DG | Alpha-Acoradiene | PGR     | 48     |
| DG | Alpha-Acoradiene | ADH7    | 22.373 |
| DG | Alpha-Acoradiene | AQP8    | 22.373 |
| DG | Alpha-Acoradiene | ASPA    | 22.373 |
| DG | Alpha-Acoradiene | APOE    | 22.373 |
| DG | Alpha-Acoradiene | MC4R    | 22.373 |
| DG | Alpha-Acoradiene | SCN5A   | 22.373 |
| DG | Alpha-Acoradiene | KCNIP2  | 22.373 |
| DG | Alpha-Acoradiene | SCGB1A1 | 22.373 |
| DG | Alpha-Acoradiene | CACNA1D | 22.373 |
| DG | Alpha-Acoradiene | PPARD   | 22.373 |

|    |                  |         |         |
|----|------------------|---------|---------|
| DG | Alpha-Acoradiene | ALDH3B1 | 22.373  |
| DG | Alpha-Acoradiene | ALDH3B2 | 22.373  |
| DG | Alpha-Acoradiene | GJA5    | 22.373  |
| DG | Alpha-Acoradiene | KCNA10  | 80.882  |
| DG | Alpha-Acoradiene | TPO     | 80.882  |
| DG | Alpha-Acoradiene | KCNC2   | 80.882  |
| DG | Alpha-Acoradiene | RNASE1  | 80.882  |
| DG | Alpha-Acoradiene | KCNA6   | 80.882  |
| DG | Alpha-Acoradiene | IYD     | 55.444  |
| DG | Alpha-Acoradiene | OPRK1   | 48      |
| DG | Alpha-Acoradiene | NFIB    | 22.373  |
| DG | Alpha-Acoradiene | ARX     | 22.373  |
| DG | Alpha-Acoradiene | NRXN1   | 22.373  |
| DG | Alpha-Acoradiene | SOX15   | 22.373  |
| DG | Alpha-Acoradiene | IL1B    | 22.373  |
| DG | Alpha-Acoradiene | SCN10A  | 22.373  |
| DG | Alpha-Acoradiene | GPX7    | 22.373  |
| DG | Alpha-Acoradiene | OXTR    | 22.373  |
| DG | Alpha-Acoradiene | RAPGEF2 | 22.373  |
| DG | Alpha-Acoradiene | NKX2-1  | 22.373  |
| DG | Alpha-Acoradiene | NPPA    | 22.373  |
| DG | Alpha-Acoradiene | RNASE2  | 22.373  |
| DG | Alpha-Acoradiene | FAS     | 22.373  |
| DG | Adenine          | ADORA2A | 122.778 |
| DG | Adenine          | PRKAB1  | 48      |
| DG | Adenine          | ADCY1   | 48      |
| DG | Adenine          | ADK     | 48      |
| DG | Adenine          | RRM2    | 48      |
| DG | Adenine          | PIM1    | 48      |
| DG | Adenine          | AMD1    | 48      |
| DG | Adenine          | RRM1    | 48      |
| DG | Adenine          | ADORA2B | 122.778 |
| DG | Adenine          | ACSS2   | 48      |
| DG | Adenine          | COMT    | 48      |
| DG | Adenine          | GNMT    | 48      |
| DG | Adenine          | PRKAA1  | 48      |
| DG | Adenine          | PYGL    | 48      |
| DG | Adenine          | ACSL1   | 48      |
| DG | Adenine          | MTAP    | 22.373  |
| DG | Adenine          | ADORA3  | 122.778 |
| DG | Adenine          | POLE    | 48      |
| DG | Adenine          | POLA1   | 48      |
| DG | Adenine          | PNP     | 48      |
| DG | Adenine          | MAT1A   | 48      |
| DG | Adenine          | POLE2   | 48      |
| DG | Adenine          | PDE4B   | 48      |
| DG | Adenine          | PRPS1   | 22.373  |
| DG | Adenine          | ADORA1  | 122.778 |
| DG | Adenine          | CBS     | 48      |
| DG | Adenine          | DCK     | 48      |
| DG | Adenine          | PDE4D   | 48      |

|    |                |         |        |
|----|----------------|---------|--------|
| DG | Adenine        | CREB1   | 48     |
| DG | Adenine        | HINT1   | 48     |
| DG | Adenine        | PRKAB2  | 48     |
| DG | Adenine        | FBP1    | 48     |
| DG | Adenine        | POLE3   | 48     |
| DG | Adenine        | RRM2B   | 48     |
| DG | Adenine        | CBSL    | 48     |
| DG | Adenine        | ACSS1   | 48     |
| DG | Adenine        | MAT2A   | 48     |
| DG | Adenine        | POLE4   | 48     |
| DG | Isococculidine | CHRM3   | 48     |
| DG | Isococculidine | CHRM2   | 48     |
| DG | Isococculidine | ADRA2A  | 23     |
| DG | Isococculidine | MAOA    | 23     |
| DG | Isococculidine | ACHE    | 23     |
| DG | Isococculidine | ADRA1B  | 23     |
| DG | Isococculidine | SLC6A2  | 23     |
| DG | Isococculidine | YWHAE   | 22.373 |
| DG | Isococculidine | CNR1    | 22.373 |
| DG | Isococculidine | CD34    | 22.373 |
| DG | Isococculidine | DRD2    | 48     |
| DG | Isococculidine | ADRA1A  | 23     |
| DG | Isococculidine | HTR6    | 23     |
| DG | Isococculidine | CHRM5   | 23     |
| DG | Isococculidine | KCNH2   | 23     |
| DG | Isococculidine | ADRA2C  | 23     |
| DG | Isococculidine | DNMT3A  | 22.373 |
| DG | Isococculidine | HTR1B   | 22.373 |
| DG | Isococculidine | INS     | 22.373 |
| DG | Isococculidine | CALCA   | 22.373 |
| DG | Isococculidine | SLC18A2 | 48     |
| DG | Isococculidine | HTR2A   | 23     |
| DG | Isococculidine | SLC18A1 | 23     |
| DG | Isococculidine | SLC6A4  | 23     |
| DG | Isococculidine | ACE     | 23     |
| DG | Isococculidine | DRD1    | 23     |
| DG | Isococculidine | SCT     | 22.373 |
| DG | Isococculidine | CHRNA7  | 22.373 |
| DG | Isococculidine | SLC22A1 | 22.373 |
| DG | Isococculidine | CHRNA2  | 48     |
| DG | Isococculidine | CHRM1   | 23     |
| DG | Isococculidine | HTR2C   | 23     |
| DG | Isococculidine | HRH4    | 23     |
| DG | Isococculidine | HRH2    | 23     |
| DG | Isococculidine | CHRM4   | 23     |
| DG | Isococculidine | PHKG2   | 22.373 |
| DG | Isococculidine | CEND1   | 22.373 |
| DG | Isococculidine | NPPA    | 22.373 |
| DG | Isococculidine | BCHE    | 48     |
| DG | Isococculidine | HTR2B   | 23     |
| DG | Isococculidine | ADRA1D  | 23     |



|    |                |         |        |
|----|----------------|---------|--------|
| DG | Isococculidine | HRH1    | 23     |
| DG | Isococculidine | HTR1A   | 23     |
| DG | Isococculidine | ADRA2B  | 23     |
| DG | Isococculidine | APLP1   | 22.373 |
| DG | Isococculidine | COLQ    | 22.373 |
| DG | Isococculidine | DRD5    | 22.373 |
| DG | O-Cresol       | GABRA2  | 80.882 |
| DG | O-Cresol       | TNF     | 80.882 |
| DG | O-Cresol       | GABRP   | 80.882 |
| DG | O-Cresol       | GABRQ   | 80.882 |
| DG | O-Cresol       | PDE4B   | 80.882 |
| DG | O-Cresol       | COLQ    | 55.444 |
| DG | O-Cresol       | HMGA2   | 22.373 |
| DG | O-Cresol       | NRG1    | 22.373 |
| DG | O-Cresol       | DMGDH   | 22.373 |
| DG | O-Cresol       | LGALS3  | 22.373 |
| DG | O-Cresol       | TLR3    | 22.373 |
| DG | O-Cresol       | SHH     | 22.373 |
| DG | O-Cresol       | ADORA2B | 22.373 |
| DG | O-Cresol       | AURKA   | 22.373 |
| DG | O-Cresol       | DNM3    | 22.373 |
| DG | O-Cresol       | SLC6A4  | 22.373 |
| DG | O-Cresol       | ADIRF   | 22.373 |
| DG | O-Cresol       | IL10    | 22.373 |
| DG | O-Cresol       | FNTA    | 22.373 |
| DG | O-Cresol       | AHCY    | 22.373 |
| DG | O-Cresol       | IKBKB   | 22.373 |
| DG | O-Cresol       | CHDH    | 22.373 |
| DG | O-Cresol       | HCN2    | 22.373 |
| DG | O-Cresol       | GABRD   | 80.882 |
| DG | O-Cresol       | GABRE   | 80.882 |
| DG | O-Cresol       | GABRA4  | 80.882 |
| DG | O-Cresol       | GABRB3  | 80.882 |
| DG | O-Cresol       | BCHE    | 80.882 |
| DG | O-Cresol       | LTA     | 55.444 |
| DG | O-Cresol       | PDE5A   | 22.373 |
| DG | O-Cresol       | CD74    | 22.373 |
| DG | O-Cresol       | NKX3-1  | 22.373 |
| DG | O-Cresol       | KLF4    | 22.373 |
| DG | O-Cresol       | EPO     | 22.373 |
| DG | O-Cresol       | RIPK1   | 22.373 |
| DG | O-Cresol       | ALDH7A1 | 22.373 |
| DG | O-Cresol       | WNT2    | 22.373 |
| DG | O-Cresol       | FCER2   | 22.373 |
| DG | O-Cresol       | TGFB2   | 22.373 |
| DG | O-Cresol       | BDKRB2  | 22.373 |
| DG | O-Cresol       | CDH8    | 22.373 |
| DG | O-Cresol       | HPN     | 22.373 |
| DG | O-Cresol       | APOA1   | 22.373 |
| DG | O-Cresol       | IDO1    | 22.373 |
| DG | O-Cresol       | SOX9    | 22.373 |

|    |          |         |        |
|----|----------|---------|--------|
| DG | O-Cresol | PDE3A   | 80.882 |
| DG | O-Cresol | SCN2A   | 80.882 |
| DG | O-Cresol | GABRB2  | 80.882 |
| DG | O-Cresol | GABRA5  | 80.882 |
| DG | O-Cresol | GABRG2  | 80.882 |
| DG | O-Cresol | RXRA    | 55.444 |
| DG | O-Cresol | APOA2   | 22.373 |
| DG | O-Cresol | HPX     | 22.373 |
| DG | O-Cresol | SIX3    | 22.373 |
| DG | O-Cresol | LILRB1  | 22.373 |
| DG | O-Cresol | MAP2K5  | 22.373 |
| DG | O-Cresol | FGF10   | 22.373 |
| DG | O-Cresol | FADD    | 22.373 |
| DG | O-Cresol | YBX3    | 22.373 |
| DG | O-Cresol | WNT2B   | 22.373 |
| DG | O-Cresol | RAPGEF2 | 22.373 |
| DG | O-Cresol | ASCL1   | 22.373 |
| DG | O-Cresol | NCOA1   | 22.373 |
| DG | O-Cresol | KMT2A   | 22.373 |
| DG | O-Cresol | ARHGEF2 | 22.373 |
| DG | O-Cresol | CTNNB1  | 22.373 |
| DG | O-Cresol | CAMK2G  | 22.373 |
| DG | O-Cresol | GABRB1  | 80.882 |
| DG | O-Cresol | GABRA3  | 80.882 |
| DG | O-Cresol | ACHE    | 80.882 |
| DG | O-Cresol | GABRA6  | 80.882 |
| DG | O-Cresol | PDE3B   | 55.444 |
| DG | O-Cresol | SCN1A   | 23     |
| DG | O-Cresol | SLC5A7  | 22.373 |
| DG | O-Cresol | SIRT2   | 22.373 |
| DG | O-Cresol | HCN4    | 22.373 |
| DG | O-Cresol | NCKAP1L | 22.373 |
| DG | O-Cresol | EIF2AK1 | 22.373 |
| DG | O-Cresol | PRSS12  | 22.373 |
| DG | O-Cresol | FGFR2   | 22.373 |
| DG | O-Cresol | IL1RN   | 22.373 |
| DG | O-Cresol | IFNG    | 22.373 |
| DG | O-Cresol | TIRAP   | 22.373 |
| DG | O-Cresol | ENPP6   | 22.373 |
| DG | O-Cresol | IL6     | 22.373 |
| DG | O-Cresol | NOD2    | 22.373 |
| DG | O-Cresol | IL4     | 22.373 |
| DG | O-Cresol | CHKA    | 22.373 |
| DG | O-Cresol | FAS     | 22.373 |
| DG | O-Cresol | GABRG3  | 80.882 |
| DG | O-Cresol | GABRG1  | 80.882 |
| DG | O-Cresol | SCN4A   | 80.882 |
| DG | O-Cresol | GABRA1  | 80.882 |
| DG | O-Cresol | PDE4D   | 55.444 |
| DG | O-Cresol | SCN3A   | 23     |
| DG | O-Cresol | SEMA4D  | 22.373 |

|    |          |         |         |
|----|----------|---------|---------|
| DG | O-Cresol | MIF     | 22.373  |
| DG | O-Cresol | FASLG   | 22.373  |
| DG | O-Cresol | CRP     | 22.373  |
| DG | O-Cresol | IL1B    | 22.373  |
| DG | O-Cresol | SLC44A4 | 22.373  |
| DG | O-Cresol | ANGPT1  | 22.373  |
| DG | O-Cresol | PLN     | 22.373  |
| DG | O-Cresol | HRC     | 22.373  |
| DG | O-Cresol | ROCK2   | 22.373  |
| DG | O-Cresol | CAMK2D  | 22.373  |
| DG | O-Cresol | ROCK1   | 22.373  |
| DG | O-Cresol | BMP4    | 22.373  |
| DG | O-Cresol | AGRN    | 22.373  |
| DG | O-Cresol | PDE2A   | 22.373  |
| DG | O-Cresol | GRIN1   | 22.373  |
| DG | Retinol  | RDH11   | 122.778 |
| DG | Retinol  | RDH5    | 122.778 |
| DG | Retinol  | ALDH1A1 | 122.778 |
| DG | Retinol  | ALDH1A2 | 122.778 |
| DG | Retinol  | RARRES1 | 48      |
| DG | Retinol  | RARB    | 48      |
| DG | Retinol  | VDR     | 48      |
| DG | Retinol  | ALDH8A1 | 22.373  |
| DG | Retinol  | THRA    | 22.373  |
| DG | Retinol  | DLX5    | 22.373  |
| DG | Retinol  | OPN5    | 22.373  |
| DG | Retinol  | RBP3    | 122.778 |
| DG | Retinol  | ALDH1A3 | 122.778 |
| DG | Retinol  | RLBP1   | 122.778 |
| DG | Retinol  | ALDH3A1 | 55.444  |
| DG | Retinol  | NR0B1   | 48      |
| DG | Retinol  | RXRG    | 48      |
| DG | Retinol  | CYP27B1 | 48      |
| DG | Retinol  | SHBG    | 22.373  |
| DG | Retinol  | PAX2    | 22.373  |
| DG | Retinol  | RET     | 22.373  |
| DG | Retinol  | DHRS9   | 22.373  |
| DG | Retinol  | RETSAT  | 122.778 |
| DG | Retinol  | RDH12   | 122.778 |
| DG | Retinol  | RDH14   | 122.778 |
| DG | Retinol  | RHO     | 55.444  |
| DG | Retinol  | ESR1    | 48      |
| DG | Retinol  | RARA    | 48      |
| DG | Retinol  | CTSH    | 22.373  |
| DG | Retinol  | DHRS2   | 22.373  |
| DG | Retinol  | CBR3    | 22.373  |
| DG | Retinol  | THRB    | 22.373  |
| DG | Retinol  | CBR1    | 22.373  |
| DG | Retinol  | RDH13   | 122.778 |
| DG | Retinol  | DHRS4   | 122.778 |
| DG | Retinol  | RDH8    | 122.778 |

|    |                              |         |         |
|----|------------------------------|---------|---------|
| DG | Retinol                      | RS1     | 55.444  |
| DG | Retinol                      | RARG    | 48      |
| DG | Retinol                      | GPRC5A  | 48      |
| DG | Retinol                      | OPN4    | 22.373  |
| DG | Retinol                      | HSD17B7 | 22.373  |
| DG | Retinol                      | GATA3   | 22.373  |
| DG | Retinol                      | CRYM    | 22.373  |
| DG | Retinol                      | CYP1A1  | 22.373  |
| DG | Retinol                      | DHRS3   | 122.778 |
| DG | Retinol                      | RBPI    | 122.778 |
| DG | Retinol                      | LRAT    | 122.778 |
| DG | Retinol                      | RXRB    | 48      |
| DG | Retinol                      | PGR     | 48      |
| DG | Retinol                      | RXRA    | 48      |
| DG | Retinol                      | RDH10   | 22.373  |
| DG | Retinol                      | AR      | 22.373  |
| DG | Retinol                      | ASCL1   | 22.373  |
| DG | Retinol                      | TSPO    | 22.373  |
| DG | 1,2-Benzenedicarboxylic Acid | PLAT    | 80.882  |
| DG | 1,2-Benzenedicarboxylic Acid | BCL2    | 80.882  |
| DG | 1,2-Benzenedicarboxylic Acid | PTGS2   | 80.882  |
| DG | 1,2-Benzenedicarboxylic Acid | IL13    | 55.444  |
| DG | 1,2-Benzenedicarboxylic Acid | AKR1C1  | 48      |
| DG | 1,2-Benzenedicarboxylic Acid | SLC4A7  | 22.373  |
| DG | 1,2-Benzenedicarboxylic Acid | NGFR    | 22.373  |
| DG | 1,2-Benzenedicarboxylic Acid | SIRT2   | 22.373  |
| DG | 1,2-Benzenedicarboxylic Acid | AVPR1A  | 22.373  |
| DG | 1,2-Benzenedicarboxylic Acid | FASLG   | 22.373  |
| DG | 1,2-Benzenedicarboxylic Acid | MAPK9   | 22.373  |
| DG | 1,2-Benzenedicarboxylic Acid | OXER1   | 22.373  |
| DG | 1,2-Benzenedicarboxylic Acid | RUNX1   | 22.373  |
| DG | 1,2-Benzenedicarboxylic Acid | HSH2D   | 22.373  |
| DG | 1,2-Benzenedicarboxylic Acid | CNTF    | 22.373  |
| DG | 1,2-Benzenedicarboxylic Acid | SRC     | 22.373  |
| DG | 1,2-Benzenedicarboxylic Acid | SLC6A4  | 22.373  |
| DG | 1,2-Benzenedicarboxylic Acid | INS     | 22.373  |
| DG | 1,2-Benzenedicarboxylic Acid | WNT11   | 22.373  |
| DG | 1,2-Benzenedicarboxylic Acid | SLC26A3 | 22.373  |
| DG | 1,2-Benzenedicarboxylic Acid | IL6     | 22.373  |
| DG | 1,2-Benzenedicarboxylic Acid | NR1D1   | 22.373  |
| DG | 1,2-Benzenedicarboxylic Acid | SLC34A1 | 22.373  |
| DG | 1,2-Benzenedicarboxylic Acid | CPLX2   | 22.373  |
| DG | 1,2-Benzenedicarboxylic Acid | MYOG    | 22.373  |
| DG | 1,2-Benzenedicarboxylic Acid | SEC61B  | 22.373  |
| DG | 1,2-Benzenedicarboxylic Acid | CCM2L   | 22.373  |
| DG | 1,2-Benzenedicarboxylic Acid | HCAR2   | 80.882  |
| DG | 1,2-Benzenedicarboxylic Acid | FABP2   | 80.882  |
| DG | 1,2-Benzenedicarboxylic Acid | NNMT    | 80.882  |
| DG | 1,2-Benzenedicarboxylic Acid | C1QTNF3 | 55.444  |
| DG | 1,2-Benzenedicarboxylic Acid | PDXP    | 22.373  |
| DG | 1,2-Benzenedicarboxylic Acid | NOX1    | 22.373  |

|    |                              |           |        |
|----|------------------------------|-----------|--------|
| DG | 1,2-Benzenedicarboxylic Acid | FNDC5     | 22.373 |
| DG | 1,2-Benzenedicarboxylic Acid | OSBPL8    | 22.373 |
| DG | 1,2-Benzenedicarboxylic Acid | DNAJC3    | 22.373 |
| DG | 1,2-Benzenedicarboxylic Acid | ITGB3     | 22.373 |
| DG | 1,2-Benzenedicarboxylic Acid | ADAMTS9   | 22.373 |
| DG | 1,2-Benzenedicarboxylic Acid | PNPLA2    | 22.373 |
| DG | 1,2-Benzenedicarboxylic Acid | CLN3      | 22.373 |
| DG | 1,2-Benzenedicarboxylic Acid | ITGAV     | 22.373 |
| DG | 1,2-Benzenedicarboxylic Acid | PTPN2     | 22.373 |
| DG | 1,2-Benzenedicarboxylic Acid | AVP       | 22.373 |
| DG | 1,2-Benzenedicarboxylic Acid | TCAF2     | 22.373 |
| DG | 1,2-Benzenedicarboxylic Acid | NGF       | 22.373 |
| DG | 1,2-Benzenedicarboxylic Acid | CDKN2A    | 22.373 |
| DG | 1,2-Benzenedicarboxylic Acid | CDC20     | 22.373 |
| DG | 1,2-Benzenedicarboxylic Acid | RET       | 22.373 |
| DG | 1,2-Benzenedicarboxylic Acid | IFI6      | 22.373 |
| DG | 1,2-Benzenedicarboxylic Acid | MECOM     | 22.373 |
| DG | 1,2-Benzenedicarboxylic Acid | PPARA     | 22.373 |
| DG | 1,2-Benzenedicarboxylic Acid | S100A9    | 22.373 |
| DG | 1,2-Benzenedicarboxylic Acid | NR1H4     | 22.373 |
| DG | 1,2-Benzenedicarboxylic Acid | THBD      | 80.882 |
| DG | 1,2-Benzenedicarboxylic Acid | CFTR      | 80.882 |
| DG | 1,2-Benzenedicarboxylic Acid | APOA2     | 55.444 |
| DG | 1,2-Benzenedicarboxylic Acid | KCNE2     | 55.444 |
| DG | 1,2-Benzenedicarboxylic Acid | NDRG2     | 22.373 |
| DG | 1,2-Benzenedicarboxylic Acid | NAMPT     | 22.373 |
| DG | 1,2-Benzenedicarboxylic Acid | RAB11FIP5 | 22.373 |
| DG | 1,2-Benzenedicarboxylic Acid | CA7       | 22.373 |
| DG | 1,2-Benzenedicarboxylic Acid | ANO9      | 22.373 |
| DG | 1,2-Benzenedicarboxylic Acid | TP53      | 22.373 |
| DG | 1,2-Benzenedicarboxylic Acid | SLC26A6   | 22.373 |
| DG | 1,2-Benzenedicarboxylic Acid | MYF6      | 22.373 |
| DG | 1,2-Benzenedicarboxylic Acid | PNP       | 22.373 |
| DG | 1,2-Benzenedicarboxylic Acid | SCRIB     | 22.373 |
| DG | 1,2-Benzenedicarboxylic Acid | S100A8    | 22.373 |
| DG | 1,2-Benzenedicarboxylic Acid | BAX       | 22.373 |
| DG | 1,2-Benzenedicarboxylic Acid | BDKRB2    | 22.373 |
| DG | 1,2-Benzenedicarboxylic Acid | RAB11FIP3 | 22.373 |
| DG | 1,2-Benzenedicarboxylic Acid | ALOX15B   | 22.373 |
| DG | 1,2-Benzenedicarboxylic Acid | NUDT12    | 22.373 |
| DG | 1,2-Benzenedicarboxylic Acid | BCL2L1    | 22.373 |
| DG | 1,2-Benzenedicarboxylic Acid | ABCA1     | 22.373 |
| DG | 1,2-Benzenedicarboxylic Acid | ABHD5     | 22.373 |
| DG | 1,2-Benzenedicarboxylic Acid | CA2       | 22.373 |
| DG | 1,2-Benzenedicarboxylic Acid | RAB11FIP1 | 22.373 |
| DG | 1,2-Benzenedicarboxylic Acid | ABCG1     | 22.373 |
| DG | 1,2-Benzenedicarboxylic Acid | PPARG     | 80.882 |
| DG | 1,2-Benzenedicarboxylic Acid | HCAR3     | 80.882 |
| DG | 1,2-Benzenedicarboxylic Acid | TCAF1     | 55.444 |
| DG | 1,2-Benzenedicarboxylic Acid | ANXA1     | 55.444 |
| DG | 1,2-Benzenedicarboxylic Acid | ASPDH     | 22.373 |

|    |                              |          |        |
|----|------------------------------|----------|--------|
| DG | 1,2-Benzenedicarboxylic Acid | RGCC     | 22.373 |
| DG | 1,2-Benzenedicarboxylic Acid | NR1H3    | 22.373 |
| DG | 1,2-Benzenedicarboxylic Acid | MYF5     | 22.373 |
| DG | 1,2-Benzenedicarboxylic Acid | SHOX2    | 22.373 |
| DG | 1,2-Benzenedicarboxylic Acid | PRKDC    | 22.373 |
| DG | 1,2-Benzenedicarboxylic Acid | FXYD1    | 22.373 |
| DG | 1,2-Benzenedicarboxylic Acid | MEF2C    | 22.373 |
| DG | 1,2-Benzenedicarboxylic Acid | AURKA    | 22.373 |
| DG | 1,2-Benzenedicarboxylic Acid | MYOD1    | 22.373 |
| DG | 1,2-Benzenedicarboxylic Acid | ALOX5AP  | 22.373 |
| DG | 1,2-Benzenedicarboxylic Acid | IFNG     | 22.373 |
| DG | 1,2-Benzenedicarboxylic Acid | NR1H2    | 22.373 |
| DG | 1,2-Benzenedicarboxylic Acid | ANAPC2   | 22.373 |
| DG | 1,2-Benzenedicarboxylic Acid | CAV3     | 22.373 |
| DG | 1,2-Benzenedicarboxylic Acid | DNAJA3   | 22.373 |
| DG | 1,2-Benzenedicarboxylic Acid | COL1A1   | 22.373 |
| DG | 1,2-Benzenedicarboxylic Acid | KMO      | 22.373 |
| DG | 1,2-Benzenedicarboxylic Acid | SNCA     | 22.373 |
| DG | 1,2-Benzenedicarboxylic Acid | ALOX15   | 22.373 |
| DG | 1,2-Benzenedicarboxylic Acid | KYNU     | 22.373 |
| DG | 1,2-Benzenedicarboxylic Acid | PRDM16   | 22.373 |
| DG | 1,2-Benzenedicarboxylic Acid | QPRT     | 80.882 |
| DG | 1,2-Benzenedicarboxylic Acid | PTGS1    | 80.882 |
| DG | 1,2-Benzenedicarboxylic Acid | IL1B     | 55.444 |
| DG | 1,2-Benzenedicarboxylic Acid | SERPINB7 | 55.444 |
| DG | 1,2-Benzenedicarboxylic Acid | ATOH1    | 22.373 |
| DG | 1,2-Benzenedicarboxylic Acid | SIRT1    | 22.373 |
| DG | 1,2-Benzenedicarboxylic Acid | ADAMTS20 | 22.373 |
| DG | 1,2-Benzenedicarboxylic Acid | ACMSD    | 22.373 |
| DG | 1,2-Benzenedicarboxylic Acid | KITLG    | 22.373 |
| DG | 1,2-Benzenedicarboxylic Acid | METRNL   | 22.373 |
| DG | 1,2-Benzenedicarboxylic Acid | STX3     | 22.373 |
| DG | 1,2-Benzenedicarboxylic Acid | PTGIS    | 22.373 |
| DG | 1,2-Benzenedicarboxylic Acid | HEG1     | 22.373 |
| DG | 1,2-Benzenedicarboxylic Acid | MCL1     | 22.373 |
| DG | 1,2-Benzenedicarboxylic Acid | TCF3     | 22.373 |
| DG | 1,2-Benzenedicarboxylic Acid | SEC24B   | 22.373 |
| DG | 1,2-Benzenedicarboxylic Acid | NEUROD2  | 22.373 |
| DG | 1,2-Benzenedicarboxylic Acid | HAAO     | 22.373 |
| DG | 1,2-Benzenedicarboxylic Acid | HTT      | 22.373 |
| DG | 1,2-Benzenedicarboxylic Acid | ZEB2     | 22.373 |
| DG | 1,2-Benzenedicarboxylic Acid | BDNF     | 22.373 |
| DG | 1,2-Benzenedicarboxylic Acid | NAPRT    | 22.373 |
| DG | 1,2-Benzenedicarboxylic Acid | ADIPOQ   | 22.373 |
| DG | 1,2-Benzenedicarboxylic Acid | PAWR     | 22.373 |
| DG | 1,2-Benzenedicarboxylic Acid | FABP3    | 22.373 |
| DG | 1,2-Benzenedicarboxylic Acid | RAG2     | 22.373 |
| DG | Dimethyl Camphorate          | NPR1     | 80.882 |
| DG | Dimethyl Camphorate          | COX1     | 48     |
| DG | Dimethyl Camphorate          | AR       | 48     |
| DG | Dimethyl Camphorate          | COX6A2   | 48     |

|    |                     |          |        |
|----|---------------------|----------|--------|
| DG | Dimethyl Camphorate | CES1     | 48     |
| DG | Dimethyl Camphorate | NR1H4    | 48     |
| DG | Dimethyl Camphorate | ESRRG    | 48     |
| DG | Dimethyl Camphorate | AKR1C2   | 48     |
| DG | Dimethyl Camphorate | COX7A1   | 48     |
| DG | Dimethyl Camphorate | TYR      | 48     |
| DG | Dimethyl Camphorate | SRD5A2   | 48     |
| DG | Dimethyl Camphorate | NPR3     | 22.373 |
| DG | Dimethyl Camphorate | COX6C    | 48     |
| DG | Dimethyl Camphorate | AKR1D1   | 48     |
| DG | Dimethyl Camphorate | FECH     | 48     |
| DG | Dimethyl Camphorate | ADH1C    | 48     |
| DG | Dimethyl Camphorate | COX7B    | 48     |
| DG | Dimethyl Camphorate | NPR2     | 22.373 |
| DG | Dimethyl Camphorate | COX5B    | 48     |
| DG | Dimethyl Camphorate | COX5A    | 48     |
| DG | Dimethyl Camphorate | COX4I1   | 48     |
| DG | Dimethyl Camphorate | COX6B1   | 48     |
| DG | Dimethyl Camphorate | COX2     | 48     |
| DG | Dimethyl Camphorate | COX7C    | 48     |
| DG | Dimethyl Camphorate | COX3     | 48     |
| DG | Dimethyl Camphorate | PLA2G1B  | 48     |
| DG | Dimethyl Camphorate | FABP6    | 48     |
| DG | Dimethyl Camphorate | COX8A    | 48     |
| DG | Choline             | PLD1     | 686    |
| DG | Choline             | PLD2     | 686    |
| DG | Choline             | NRG1     | 22.373 |
| DG | Choline             | NAPEPLD  | 22.373 |
| DG | Choline             | ALDH7A1  | 22.373 |
| DG | Choline             | ENPP6    | 22.373 |
| DG | Choline             | AGRN     | 22.373 |
| DG | Choline             | PCYT1A   | 686    |
| DG | Choline             | BCHE     | 686    |
| DG | Choline             | DMGDH    | 22.373 |
| DG | Choline             | FSCN1    | 22.373 |
| DG | Choline             | DNM3     | 22.373 |
| DG | Choline             | CDH8     | 22.373 |
| DG | Choline             | CHKA     | 22.373 |
| DG | Choline             | PCYT1B   | 686    |
| DG | Choline             | COLQ     | 55.444 |
| DG | Choline             | SIX3     | 22.373 |
| DG | Choline             | PRSS12   | 22.373 |
| DG | Choline             | PLD4     | 22.373 |
| DG | Choline             | PLD3     | 22.373 |
| DG | Choline             | CHDH     | 22.373 |
| DG | Choline             | PHOSPHO1 | 686    |
| DG | Choline             | SLC5A7   | 22.373 |
| DG | Choline             | RAP1GAP  | 22.373 |
| DG | Choline             | KLF5     | 22.373 |
| DG | Choline             | ASCL1    | 22.373 |
| DG | Choline             | PODXL    | 22.373 |

|    |                                   |         |         |
|----|-----------------------------------|---------|---------|
| DG | Choline                           | ATP8B1  | 22.373  |
| DG | Choline                           | ACHE    | 686     |
| DG | Choline                           | HMOX1   | 22.373  |
| DG | Choline                           | CRP     | 22.373  |
| DG | Choline                           | SLC44A4 | 22.373  |
| DG | Choline                           | GPLD1   | 22.373  |
| DG | Choline                           | FNTA    | 22.373  |
| DG | Choline                           | GRIN1   | 22.373  |
| DG | 3(S)-3-Butyl-4,5-Dihydrophthalide | CHRM3   | 80.882  |
| DG | 3(S)-3-Butyl-4,5-Dihydrophthalide | AR      | 48      |
| DG | 3(S)-3-Butyl-4,5-Dihydrophthalide | DOCK5   | 22.373  |
| DG | 3(S)-3-Butyl-4,5-Dihydrophthalide | DOCK4   | 22.373  |
| DG | 3(S)-3-Butyl-4,5-Dihydrophthalide | CHRM1   | 80.882  |
| DG | 3(S)-3-Butyl-4,5-Dihydrophthalide | NR3C1   | 48      |
| DG | 3(S)-3-Butyl-4,5-Dihydrophthalide | NTSR1   | 22.373  |
| DG | 3(S)-3-Butyl-4,5-Dihydrophthalide | MAP2K1  | 22.373  |
| DG | 3(S)-3-Butyl-4,5-Dihydrophthalide | CHRM2   | 80.882  |
| DG | 3(S)-3-Butyl-4,5-Dihydrophthalide | CYP19A1 | 48      |
| DG | 3(S)-3-Butyl-4,5-Dihydrophthalide | CHRM5   | 22.373  |
| DG | 3(S)-3-Butyl-4,5-Dihydrophthalide | CHRM4   | 22.373  |
| DG | 3(S)-3-Butyl-4,5-Dihydrophthalide | ESR1    | 48      |
| DG | 3(S)-3-Butyl-4,5-Dihydrophthalide | NR3C2   | 48      |
| DG | 3(S)-3-Butyl-4,5-Dihydrophthalide | GNA15   | 22.373  |
| DG | 3(S)-3-Butyl-4,5-Dihydrophthalide | PGR     | 48      |
| DG | 3(S)-3-Butyl-4,5-Dihydrophthalide | ARFGF2  | 22.373  |
| DG | 3(S)-3-Butyl-4,5-Dihydrophthalide | P2RX1   | 22.373  |
| DG | Cedrol                            | TRPV3   | 122.778 |
| DG | Cedrol                            | COX6C   | 48      |
| DG | Cedrol                            | COX5A   | 48      |
| DG | Cedrol                            | COX4I1  | 48      |
| DG | Cedrol                            | FABP6   | 48      |
| DG | Cedrol                            | NR1H4   | 48      |
| DG | Cedrol                            | OPRK1   | 122.778 |
| DG | Cedrol                            | COX5B   | 48      |
| DG | Cedrol                            | COX3    | 48      |
| DG | Cedrol                            | PLA2G1B | 48      |
| DG | Cedrol                            | CES1    | 48      |
| DG | Cedrol                            | TRPM8   | 122.778 |
| DG | Cedrol                            | COX7C   | 48      |
| DG | Cedrol                            | AR      | 48      |
| DG | Cedrol                            | COX6A2  | 48      |
| DG | Cedrol                            | COX7B   | 48      |
| DG | Cedrol                            | TRPA1   | 122.778 |
| DG | Cedrol                            | COX1    | 48      |
| DG | Cedrol                            | COX7A1  | 48      |
| DG | Cedrol                            | ADH1C   | 48      |
| DG | Cedrol                            | COX2    | 48      |
| DG | Cedrol                            | ESRRG   | 48      |
| DG | Cedrol                            | AKR1C2  | 48      |
| DG | Cedrol                            | FECH    | 48      |
| DG | Cedrol                            | COX6B1  | 48      |



|    |                |         |         |
|----|----------------|---------|---------|
| DG | Cedrol         | COX8A   | 48      |
| DG | 1-Tetradecanol | TRPV3   | 122.778 |
| DG | 1-Tetradecanol | GRIA4   | 80.882  |
| DG | 1-Tetradecanol | CHRN3   | 80.882  |
| DG | 1-Tetradecanol | GABRG3  | 80.882  |
| DG | 1-Tetradecanol | GABRA3  | 80.882  |
| DG | 1-Tetradecanol | CHRNA10 | 80.882  |
| DG | 1-Tetradecanol | CACNA1C | 80.882  |
| DG | 1-Tetradecanol | CHRNA2  | 80.882  |
| DG | 1-Tetradecanol | HTR3B   | 80.882  |
| DG | 1-Tetradecanol | GABRA6  | 80.882  |
| DG | 1-Tetradecanol | CHRNA5  | 80.882  |
| DG | 1-Tetradecanol | CACNG1  | 80.882  |
| DG | 1-Tetradecanol | DMTN    | 55.444  |
| DG | 1-Tetradecanol | SCN1A   | 48      |
| DG | 1-Tetradecanol | SCN10A  | 48      |
| DG | 1-Tetradecanol | TYR     | 48      |
| DG | 1-Tetradecanol | ACADSB  | 48      |
| DG | 1-Tetradecanol | GLRA3   | 23      |
| DG | 1-Tetradecanol | NAV2    | 22.373  |
| DG | 1-Tetradecanol | CACNA1A | 22.373  |
| DG | 1-Tetradecanol | MTNR1B  | 22.373  |
| DG | 1-Tetradecanol | FLOT1   | 22.373  |
| DG | 1-Tetradecanol | ADRA1D  | 22.373  |
| DG | 1-Tetradecanol | MAOA    | 22.373  |
| DG | 1-Tetradecanol | RAB3B   | 22.373  |
| DG | 1-Tetradecanol | DRD4    | 22.373  |
| DG | 1-Tetradecanol | AOC3    | 22.373  |
| DG | 1-Tetradecanol | RNF207  | 22.373  |
| DG | 1-Tetradecanol | NPPA    | 22.373  |
| DG | 1-Tetradecanol | EPHB1   | 22.373  |
| DG | 1-Tetradecanol | PINK1   | 22.373  |
| DG | 1-Tetradecanol | KISS1   | 22.373  |
| DG | 1-Tetradecanol | OPRK1   | 122.778 |
| DG | 1-Tetradecanol | GABRA2  | 80.882  |
| DG | 1-Tetradecanol | GABRB1  | 80.882  |
| DG | 1-Tetradecanol | VCAM1   | 80.882  |
| DG | 1-Tetradecanol | SLC29A1 | 80.882  |
| DG | 1-Tetradecanol | GRIA2   | 80.882  |
| DG | 1-Tetradecanol | CHRN2   | 80.882  |
| DG | 1-Tetradecanol | CHRNA6  | 80.882  |
| DG | 1-Tetradecanol | GRIA3   | 80.882  |
| DG | 1-Tetradecanol | HTR3A   | 80.882  |
| DG | 1-Tetradecanol | CHRN4   | 80.882  |
| DG | 1-Tetradecanol | ADAM8   | 55.444  |
| DG | 1-Tetradecanol | KCNMA1  | 55.444  |
| DG | 1-Tetradecanol | SCN3B   | 48      |
| DG | 1-Tetradecanol | AKR1D1  | 48      |
| DG | 1-Tetradecanol | SCN9A   | 48      |
| DG | 1-Tetradecanol | SCN8A   | 48      |
| DG | 1-Tetradecanol | HMGA2   | 22.373  |

|    |                |         |         |
|----|----------------|---------|---------|
| DG | 1-Tetradecanol | P2RX2   | 22.373  |
| DG | 1-Tetradecanol | ANK2    | 22.373  |
| DG | 1-Tetradecanol | MAOB    | 22.373  |
| DG | 1-Tetradecanol | NPY5R   | 22.373  |
| DG | 1-Tetradecanol | DRD2    | 22.373  |
| DG | 1-Tetradecanol | UTS2R   | 22.373  |
| DG | 1-Tetradecanol | KCNE5   | 22.373  |
| DG | 1-Tetradecanol | CRH     | 22.373  |
| DG | 1-Tetradecanol | NCOA1   | 22.373  |
| DG | 1-Tetradecanol | ROCK1   | 22.373  |
| DG | 1-Tetradecanol | KMT2A   | 22.373  |
| DG | 1-Tetradecanol | DRD1    | 22.373  |
| DG | 1-Tetradecanol | KCNQ1   | 22.373  |
| DG | 1-Tetradecanol | GRM7    | 22.373  |
| DG | 1-Tetradecanol | TRPM8   | 122.778 |
| DG | 1-Tetradecanol | CACNG2  | 80.882  |
| DG | 1-Tetradecanol | GRIA1   | 80.882  |
| DG | 1-Tetradecanol | CHRNA7  | 80.882  |
| DG | 1-Tetradecanol | CACNA1S | 80.882  |
| DG | 1-Tetradecanol | GABRA4  | 80.882  |
| DG | 1-Tetradecanol | CACNA1D | 80.882  |
| DG | 1-Tetradecanol | GABRB3  | 80.882  |
| DG | 1-Tetradecanol | GABRA5  | 80.882  |
| DG | 1-Tetradecanol | GABRA1  | 80.882  |
| DG | 1-Tetradecanol | KCNJ9   | 80.882  |
| DG | 1-Tetradecanol | SLC28A3 | 55.444  |
| DG | 1-Tetradecanol | SCN11A  | 48      |
| DG | 1-Tetradecanol | SCN3A   | 48      |
| DG | 1-Tetradecanol | ALDH5A1 | 48      |
| DG | 1-Tetradecanol | SCN4A   | 48      |
| DG | 1-Tetradecanol | SCN1B   | 48      |
| DG | 1-Tetradecanol | CACNA1H | 22.373  |
| DG | 1-Tetradecanol | HTR2A   | 22.373  |
| DG | 1-Tetradecanol | ZP4     | 22.373  |
| DG | 1-Tetradecanol | GLRB    | 22.373  |
| DG | 1-Tetradecanol | MSN     | 22.373  |
| DG | 1-Tetradecanol | AVP     | 22.373  |
| DG | 1-Tetradecanol | ADIRF   | 22.373  |
| DG | 1-Tetradecanol | CNR1    | 22.373  |
| DG | 1-Tetradecanol | GLI3    | 22.373  |
| DG | 1-Tetradecanol | AOC2    | 22.373  |
| DG | 1-Tetradecanol | KCNA5   | 22.373  |
| DG | 1-Tetradecanol | TNR     | 22.373  |
| DG | 1-Tetradecanol | EEA1    | 22.373  |
| DG | 1-Tetradecanol | ICAM1   | 22.373  |
| DG | 1-Tetradecanol | FOS     | 22.373  |
| DG | 1-Tetradecanol | TRPA1   | 122.778 |
| DG | 1-Tetradecanol | GABRD   | 80.882  |
| DG | 1-Tetradecanol | GLRA2   | 80.882  |
| DG | 1-Tetradecanol | KCNJ6   | 80.882  |
| DG | 1-Tetradecanol | GABRG1  | 80.882  |

|    |                |          |        |
|----|----------------|----------|--------|
| DG | 1-Tetradecanol | CHRNA3   | 80.882 |
| DG | 1-Tetradecanol | HTR3D    | 80.882 |
| DG | 1-Tetradecanol | KCNJ5    | 80.882 |
| DG | 1-Tetradecanol | SLC29A2  | 80.882 |
| DG | 1-Tetradecanol | CHRNA9   | 80.882 |
| DG | 1-Tetradecanol | HTR3C    | 80.882 |
| DG | 1-Tetradecanol | ADRA1B   | 55.444 |
| DG | 1-Tetradecanol | SCN2B    | 48     |
| DG | 1-Tetradecanol | SCN7A    | 48     |
| DG | 1-Tetradecanol | SCN2A    | 48     |
| DG | 1-Tetradecanol | SCN4B    | 48     |
| DG | 1-Tetradecanol | OGDH     | 48     |
| DG | 1-Tetradecanol | SLITRK6  | 22.373 |
| DG | 1-Tetradecanol | AVPR1A   | 22.373 |
| DG | 1-Tetradecanol | SUMO1    | 22.373 |
| DG | 1-Tetradecanol | P2RX3    | 22.373 |
| DG | 1-Tetradecanol | GHRL     | 22.373 |
| DG | 1-Tetradecanol | PAX2     | 22.373 |
| DG | 1-Tetradecanol | GHRH     | 22.373 |
| DG | 1-Tetradecanol | SLC18A3  | 22.373 |
| DG | 1-Tetradecanol | CAV3     | 22.373 |
| DG | 1-Tetradecanol | IL6      | 22.373 |
| DG | 1-Tetradecanol | TACR2    | 22.373 |
| DG | 1-Tetradecanol | ZP3      | 22.373 |
| DG | 1-Tetradecanol | POU4F3   | 22.373 |
| DG | 1-Tetradecanol | CARTPT   | 22.373 |
| DG | 1-Tetradecanol | GRIN1    | 22.373 |
| DG | 1-Tetradecanol | CACNB1   | 80.882 |
| DG | 1-Tetradecanol | CHRNA4   | 80.882 |
| DG | 1-Tetradecanol | KCNJ3    | 80.882 |
| DG | 1-Tetradecanol | GABRE    | 80.882 |
| DG | 1-Tetradecanol | GABRP    | 80.882 |
| DG | 1-Tetradecanol | GABRB2   | 80.882 |
| DG | 1-Tetradecanol | GABRQ    | 80.882 |
| DG | 1-Tetradecanol | GRIN3A   | 80.882 |
| DG | 1-Tetradecanol | HTR3E    | 80.882 |
| DG | 1-Tetradecanol | CHRFAM7A | 80.882 |
| DG | 1-Tetradecanol | GLRA1    | 80.882 |
| DG | 1-Tetradecanol | FOXL2    | 55.444 |
| DG | 1-Tetradecanol | ABAT     | 48     |
| DG | 1-Tetradecanol | SCN5A    | 48     |
| DG | 1-Tetradecanol | HDAC9    | 48     |
| DG | 1-Tetradecanol | SRD5A2   | 48     |
| DG | 1-Tetradecanol | HDAC2    | 48     |
| DG | 1-Tetradecanol | UTS2     | 22.373 |
| DG | 1-Tetradecanol | ADORA2A  | 22.373 |
| DG | 1-Tetradecanol | CNR2     | 22.373 |
| DG | 1-Tetradecanol | SLC44A4  | 22.373 |
| DG | 1-Tetradecanol | TBR1     | 22.373 |
| DG | 1-Tetradecanol | AOC1     | 22.373 |
| DG | 1-Tetradecanol | HCRT     | 22.373 |

|    |                |          |        |
|----|----------------|----------|--------|
| DG | 1-Tetradecanol | EZR      | 22.373 |
| DG | 1-Tetradecanol | SLC9A6   | 22.373 |
| DG | 1-Tetradecanol | GLRA4    | 22.373 |
| DG | 1-Tetradecanol | NRP1     | 22.373 |
| DG | 1-Tetradecanol | PLCB1    | 22.373 |
| DG | 1-Tetradecanol | CALCA    | 22.373 |
| DG | 1-Tetradecanol | ATP8B1   | 22.373 |
| DG | Anisic Acid    | RXRB     | 80.882 |
| DG | Anisic Acid    | PTGS2    | 80.882 |
| DG | Anisic Acid    | TNF      | 55.444 |
| DG | Anisic Acid    | PRKAG2   | 48     |
| DG | Anisic Acid    | HSPA5    | 48     |
| DG | Anisic Acid    | PRKAG3   | 48     |
| DG | Anisic Acid    | RBP1     | 23     |
| DG | Anisic Acid    | IHH      | 22.373 |
| DG | Anisic Acid    | NCOR1    | 22.373 |
| DG | Anisic Acid    | METRNL   | 22.373 |
| DG | Anisic Acid    | PTGIS    | 22.373 |
| DG | Anisic Acid    | NPPC     | 22.373 |
| DG | Anisic Acid    | MATN1    | 22.373 |
| DG | Anisic Acid    | BDKRB2   | 22.373 |
| DG | Anisic Acid    | ZNF536   | 22.373 |
| DG | Anisic Acid    | CDKN2A   | 22.373 |
| DG | Anisic Acid    | CDC20    | 22.373 |
| DG | Anisic Acid    | GATA4    | 22.373 |
| DG | Anisic Acid    | ABHD5    | 22.373 |
| DG | Anisic Acid    | ALOX15   | 22.373 |
| DG | Anisic Acid    | SUPT20H  | 22.373 |
| DG | Anisic Acid    | CCM2L    | 22.373 |
| DG | Anisic Acid    | RARG     | 80.882 |
| DG | Anisic Acid    | RARA     | 80.882 |
| DG | Anisic Acid    | HNRNPK   | 55.444 |
| DG | Anisic Acid    | NFKB1    | 48     |
| DG | Anisic Acid    | PRKAA2   | 48     |
| DG | Anisic Acid    | IKBKB    | 48     |
| DG | Anisic Acid    | ABCC8    | 23     |
| DG | Anisic Acid    | FNDC5    | 22.373 |
| DG | Anisic Acid    | AVPR1A   | 22.373 |
| DG | Anisic Acid    | MAPK9    | 22.373 |
| DG | Anisic Acid    | GDF5     | 22.373 |
| DG | Anisic Acid    | GCG      | 22.373 |
| DG | Anisic Acid    | TCF3     | 22.373 |
| DG | Anisic Acid    | NR1H2    | 22.373 |
| DG | Anisic Acid    | ANAPC2   | 22.373 |
| DG | Anisic Acid    | CDK5RAP3 | 22.373 |
| DG | Anisic Acid    | NR1D1    | 22.373 |
| DG | Anisic Acid    | ABCA1    | 22.373 |
| DG | Anisic Acid    | SNCA     | 22.373 |
| DG | Anisic Acid    | ANXA1    | 22.373 |
| DG | Anisic Acid    | FGF2     | 22.373 |
| DG | Anisic Acid    | RARB     | 80.882 |

|    |             |          |        |
|----|-------------|----------|--------|
| DG | Anisic Acid | PPARA    | 80.882 |
| DG | Anisic Acid | COL27A1  | 55.444 |
| DG | Anisic Acid | EDNRA    | 48     |
| DG | Anisic Acid | AKR1C1   | 48     |
| DG | Anisic Acid | PRKAB2   | 48     |
| DG | Anisic Acid | NDRG2    | 22.373 |
| DG | Anisic Acid | NR1H3    | 22.373 |
| DG | Anisic Acid | MED1     | 22.373 |
| DG | Anisic Acid | FOXA1    | 22.373 |
| DG | Anisic Acid | FOXP3    | 22.373 |
| DG | Anisic Acid | KAT2A    | 22.373 |
| DG | Anisic Acid | AVP      | 22.373 |
| DG | Anisic Acid | NEUROD2  | 22.373 |
| DG | Anisic Acid | CAV1     | 22.373 |
| DG | Anisic Acid | ALOX15B  | 22.373 |
| DG | Anisic Acid | MEX3C    | 22.373 |
| DG | Anisic Acid | NAPRT    | 22.373 |
| DG | Anisic Acid | RFWD3    | 22.373 |
| DG | Anisic Acid | SOX9     | 22.373 |
| DG | Anisic Acid | ABCG1    | 22.373 |
| DG | Anisic Acid | RXRG     | 80.882 |
| DG | Anisic Acid | RXRA     | 80.882 |
| DG | Anisic Acid | SERPINB7 | 55.444 |
| DG | Anisic Acid | NFKBIA   | 48     |
| DG | Anisic Acid | PRKAG1   | 48     |
| DG | Anisic Acid | RPS6KA3  | 48     |
| DG | Anisic Acid | NAMPT    | 22.373 |
| DG | Anisic Acid | OSBPL8   | 22.373 |
| DG | Anisic Acid | MAPK14   | 22.373 |
| DG | Anisic Acid | PNPLA2   | 22.373 |
| DG | Anisic Acid | FGF10    | 22.373 |
| DG | Anisic Acid | HEG1     | 22.373 |
| DG | Anisic Acid | PAX2     | 22.373 |
| DG | Anisic Acid | FGF4     | 22.373 |
| DG | Anisic Acid | WNT11    | 22.373 |
| DG | Anisic Acid | SREBF2   | 22.373 |
| DG | Anisic Acid | NOTCH1   | 22.373 |
| DG | Anisic Acid | WDR77    | 22.373 |
| DG | Anisic Acid | ADIPOQ   | 22.373 |
| DG | Anisic Acid | VDR      | 22.373 |
| DG | Anisic Acid | PRDM16   | 22.373 |
| DG | Anisic Acid | PTGS1    | 80.882 |
| DG | Anisic Acid | TP53     | 55.444 |
| DG | Anisic Acid | PRKAB1   | 48     |
| DG | Anisic Acid | NFKB2    | 48     |
| DG | Anisic Acid | PRKAA1   | 48     |
| DG | Anisic Acid | PPARG    | 23     |
| DG | Anisic Acid | RGCC     | 22.373 |
| DG | Anisic Acid | SPI1     | 22.373 |
| DG | Anisic Acid | ITGB3    | 22.373 |
| DG | Anisic Acid | EIF2AK1  | 22.373 |

|    |               |          |        |
|----|---------------|----------|--------|
| DG | Anisic Acid   | SERPINH1 | 22.373 |
| DG | Anisic Acid   | ITGAV    | 22.373 |
| DG | Anisic Acid   | SLC6A4   | 22.373 |
| DG | Anisic Acid   | INS      | 22.373 |
| DG | Anisic Acid   | TBC1D32  | 22.373 |
| DG | Anisic Acid   | PSME3    | 22.373 |
| DG | Anisic Acid   | KAT2B    | 22.373 |
| DG | Anisic Acid   | MECOM    | 22.373 |
| DG | Anisic Acid   | CPLX2    | 22.373 |
| DG | Anisic Acid   | WDR5     | 22.373 |
| DG | Anisic Acid   | CYR61    | 22.373 |
| DG | Phyllanthin   | ESR2     | 48     |
| DG | Phyllanthin   | ESR1     | 48     |
| DG | Phyllanthin   | NR112    | 48     |
| DG | Phyllanthin   | ALOX5    | 48     |
| DG | Pentylbenzene | GABRB2   | 80.882 |
| DG | Pentylbenzene | ADRA1A   | 48     |
| DG | Pentylbenzene | ADRB1    | 48     |
| DG | Pentylbenzene | SLC18A2  | 48     |
| DG | Pentylbenzene | TAAR1    | 48     |
| DG | Pentylbenzene | SDC4     | 22.373 |
| DG | Pentylbenzene | GABRB3   | 80.882 |
| DG | Pentylbenzene | S1PR5    | 48     |
| DG | Pentylbenzene | ADRA1D   | 48     |
| DG | Pentylbenzene | ADRA1B   | 48     |
| DG | Pentylbenzene | CARTPT   | 48     |
| DG | Pentylbenzene | CD47     | 22.373 |
| DG | Pentylbenzene | F2       | 80.882 |
| DG | Pentylbenzene | ADRB2    | 48     |
| DG | Pentylbenzene | DRD2     | 48     |
| DG | Pentylbenzene | ADRA2C   | 48     |
| DG | Pentylbenzene | ADRA2B   | 48     |
| DG | Pentylbenzene | BICD1    | 22.373 |
| DG | Pentylbenzene | GPR27    | 55.444 |
| DG | Pentylbenzene | ADRA2A   | 48     |
| DG | Pentylbenzene | MAOA     | 48     |
| DG | Pentylbenzene | ALOX5    | 48     |
| DG | Pentylbenzene | SLC6A2   | 48     |
| DG | Pentylbenzene | SLC6A3   | 48     |
| DG | Pentylbenzene | MAOB     | 48     |
| DG | Pentylbenzene | SLC6A4   | 48     |
| DG | Pentylbenzene | ADRB3    | 48     |
| DG | Pentylbenzene | CD36     | 22.373 |
| DG | Camphene      | KCND1    | 80.882 |
| DG | Camphene      | GAMT     | 80.882 |
| DG | Camphene      | CAT      | 80.882 |
| DG | Camphene      | KCNC1    | 80.882 |
| DG | Camphene      | KCND2    | 80.882 |
| DG | Camphene      | KCND3    | 80.882 |
| DG | Camphene      | KCNQ1    | 55.444 |
| DG | Camphene      | CYGB     | 22.373 |

|    |          |         |        |
|----|----------|---------|--------|
| DG | Camphene | IGF1    | 22.373 |
| DG | Camphene | EDN1    | 22.373 |
| DG | Camphene | CNTNAP4 | 22.373 |
| DG | Camphene | GRIN2A  | 22.373 |
| DG | Camphene | SPARC   | 22.373 |
| DG | Camphene | CRLF1   | 22.373 |
| DG | Camphene | ALDH1B1 | 22.373 |
| DG | Camphene | DARS    | 22.373 |
| DG | Camphene | MIP     | 22.373 |
| DG | Camphene | STX1A   | 22.373 |
| DG | Camphene | NRXN2   | 22.373 |
| DG | Camphene | DAB2IP  | 22.373 |
| DG | Camphene | KCNA3   | 80.882 |
| DG | Camphene | KCNC3   | 80.882 |
| DG | Camphene | KCNB1   | 80.882 |
| DG | Camphene | ADH1C   | 80.882 |
| DG | Camphene | ALDH2   | 80.882 |
| DG | Camphene | GUCY1B3 | 55.444 |
| DG | Camphene | FBP1    | 22.373 |
| DG | Camphene | NRXN3   | 22.373 |
| DG | Camphene | SHANK3  | 22.373 |
| DG | Camphene | OXT     | 22.373 |
| DG | Camphene | RNASE4  | 22.373 |
| DG | Camphene | SLC17A7 | 22.373 |
| DG | Camphene | SORCS3  | 22.373 |
| DG | Camphene | FADD    | 22.373 |
| DG | Camphene | LEP     | 22.373 |
| DG | Camphene | ANK3    | 22.373 |
| DG | Camphene | RYR3    | 22.373 |
| DG | Camphene | PAXBP1  | 22.373 |
| DG | Camphene | ADORA1  | 22.373 |
| DG | Camphene | CYP2E1  | 22.373 |
| DG | Camphene | PRKAB1  | 80.882 |
| DG | Camphene | KCNA1   | 80.882 |
| DG | Camphene | ADH1B   | 80.882 |
| DG | Camphene | KCNB2   | 80.882 |
| DG | Camphene | KCNA4   | 80.882 |
| DG | Camphene | GATM    | 55.444 |
| DG | Camphene | DGKI    | 22.373 |
| DG | Camphene | LRRC4B  | 22.373 |
| DG | Camphene | ACY3    | 22.373 |
| DG | Camphene | MAGI2   | 22.373 |
| DG | Camphene | RAB3A   | 22.373 |
| DG | Camphene | CYP11A1 | 22.373 |
| DG | Camphene | RNASE8  | 22.373 |
| DG | Camphene | SNTG2   | 22.373 |
| DG | Camphene | NLGN1   | 22.373 |
| DG | Camphene | KCNE5   | 22.373 |
| DG | Camphene | ZPR1    | 22.373 |
| DG | Camphene | PAX7    | 22.373 |
| DG | Camphene | ADH4    | 22.373 |

|    |                        |         |         |
|----|------------------------|---------|---------|
| DG | Camphene               | ACY1    | 22.373  |
| DG | Camphene               | ADH1A   | 80.882  |
| DG | Camphene               | KCNA2   | 80.882  |
| DG | Camphene               | DLG4    | 80.882  |
| DG | Camphene               | KCNA5   | 80.882  |
| DG | Camphene               | KCNA7   | 80.882  |
| DG | Camphene               | KCNK4   | 55.444  |
| DG | Camphene               | ADH7    | 22.373  |
| DG | Camphene               | AQP8    | 22.373  |
| DG | Camphene               | ASPA    | 22.373  |
| DG | Camphene               | APOE    | 22.373  |
| DG | Camphene               | MC4R    | 22.373  |
| DG | Camphene               | SCN5A   | 22.373  |
| DG | Camphene               | KCNIP2  | 22.373  |
| DG | Camphene               | SCGB1A1 | 22.373  |
| DG | Camphene               | CACNA1D | 22.373  |
| DG | Camphene               | PPARD   | 22.373  |
| DG | Camphene               | ALDH3B1 | 22.373  |
| DG | Camphene               | ALDH3B2 | 22.373  |
| DG | Camphene               | GJA5    | 22.373  |
| DG | Camphene               | KCNA10  | 80.882  |
| DG | Camphene               | TPO     | 80.882  |
| DG | Camphene               | KCNC2   | 80.882  |
| DG | Camphene               | RNASE1  | 80.882  |
| DG | Camphene               | KCNA6   | 80.882  |
| DG | Camphene               | IYD     | 55.444  |
| DG | Camphene               | NFIB    | 22.373  |
| DG | Camphene               | ARX     | 22.373  |
| DG | Camphene               | NRXN1   | 22.373  |
| DG | Camphene               | SOX15   | 22.373  |
| DG | Camphene               | IL1B    | 22.373  |
| DG | Camphene               | SCN10A  | 22.373  |
| DG | Camphene               | GPX7    | 22.373  |
| DG | Camphene               | OXTR    | 22.373  |
| DG | Camphene               | RAPGEF2 | 22.373  |
| DG | Camphene               | NKX2-1  | 22.373  |
| DG | Camphene               | NPPA    | 22.373  |
| DG | Camphene               | RNASE2  | 22.373  |
| DG | Camphene               | FAS     | 22.373  |
| DG | 20-Hexadecanoylingenol | PRKCA   | 122.778 |
| DG | 20-Hexadecanoylingenol | CD300A  | 22.373  |
| DG | 20-Hexadecanoylingenol | PRKCD   | 122.778 |
| DG | 20-Hexadecanoylingenol | PTGER4  | 23      |
| DG | 20-Hexadecanoylingenol | PTGER2  | 23      |
| DG | 20-Hexadecanoylingenol | PTGER3  | 23      |
| DG | 20-Hexadecanoylingenol | CHGA    | 22.373  |
| DG | 20-Hexadecanoylingenol | APOC2   | 22.373  |
| DG | 20-Hexadecanoylingenol | KIF14   | 22.373  |
| DG | 20-Hexadecanoylingenol | PRKCB   | 22.373  |
| DG | P-Cresol               | GABRA2  | 80.882  |
| DG | P-Cresol               | TNF     | 80.882  |



|    |          |         |        |
|----|----------|---------|--------|
| DG | P-Cresol | GABRP   | 80.882 |
| DG | P-Cresol | GABRQ   | 80.882 |
| DG | P-Cresol | PDE4B   | 80.882 |
| DG | P-Cresol | COLQ    | 55.444 |
| DG | P-Cresol | HMGA2   | 22.373 |
| DG | P-Cresol | NRG1    | 22.373 |
| DG | P-Cresol | DMGDH   | 22.373 |
| DG | P-Cresol | LGALS3  | 22.373 |
| DG | P-Cresol | TLR3    | 22.373 |
| DG | P-Cresol | SHH     | 22.373 |
| DG | P-Cresol | ADORA2B | 22.373 |
| DG | P-Cresol | AURKA   | 22.373 |
| DG | P-Cresol | DNM3    | 22.373 |
| DG | P-Cresol | SLC6A4  | 22.373 |
| DG | P-Cresol | ADIRF   | 22.373 |
| DG | P-Cresol | IL10    | 22.373 |
| DG | P-Cresol | FNTA    | 22.373 |
| DG | P-Cresol | AHCY    | 22.373 |
| DG | P-Cresol | IKBKB   | 22.373 |
| DG | P-Cresol | CHDH    | 22.373 |
| DG | P-Cresol | HCN2    | 22.373 |
| DG | P-Cresol | GABRD   | 80.882 |
| DG | P-Cresol | GABRE   | 80.882 |
| DG | P-Cresol | GABRA4  | 80.882 |
| DG | P-Cresol | GABRB3  | 80.882 |
| DG | P-Cresol | BCHE    | 80.882 |
| DG | P-Cresol | LTA     | 55.444 |
| DG | P-Cresol | PDE5A   | 22.373 |
| DG | P-Cresol | CD74    | 22.373 |
| DG | P-Cresol | NKX3-1  | 22.373 |
| DG | P-Cresol | KLF4    | 22.373 |
| DG | P-Cresol | EPO     | 22.373 |
| DG | P-Cresol | RIPK1   | 22.373 |
| DG | P-Cresol | ALDH7A1 | 22.373 |
| DG | P-Cresol | WNT2    | 22.373 |
| DG | P-Cresol | FCER2   | 22.373 |
| DG | P-Cresol | TGFB2   | 22.373 |
| DG | P-Cresol | BDKRB2  | 22.373 |
| DG | P-Cresol | CDH8    | 22.373 |
| DG | P-Cresol | HPN     | 22.373 |
| DG | P-Cresol | APOA1   | 22.373 |
| DG | P-Cresol | IDO1    | 22.373 |
| DG | P-Cresol | SOX9    | 22.373 |
| DG | P-Cresol | PDE3A   | 80.882 |
| DG | P-Cresol | SCN2A   | 80.882 |
| DG | P-Cresol | GABRB2  | 80.882 |
| DG | P-Cresol | GABRA5  | 80.882 |
| DG | P-Cresol | GABRG2  | 80.882 |
| DG | P-Cresol | RXRA    | 55.444 |
| DG | P-Cresol | APOA2   | 22.373 |
| DG | P-Cresol | HPX     | 22.373 |

|    |          |         |        |
|----|----------|---------|--------|
| DG | P-Cresol | SIX3    | 22.373 |
| DG | P-Cresol | LILRB1  | 22.373 |
| DG | P-Cresol | MAP2K5  | 22.373 |
| DG | P-Cresol | FGF10   | 22.373 |
| DG | P-Cresol | FADD    | 22.373 |
| DG | P-Cresol | YBX3    | 22.373 |
| DG | P-Cresol | WNT2B   | 22.373 |
| DG | P-Cresol | RAPGEF2 | 22.373 |
| DG | P-Cresol | ASCL1   | 22.373 |
| DG | P-Cresol | NCOA1   | 22.373 |
| DG | P-Cresol | KMT2A   | 22.373 |
| DG | P-Cresol | ARHGEF2 | 22.373 |
| DG | P-Cresol | CTNNB1  | 22.373 |
| DG | P-Cresol | CAMK2G  | 22.373 |
| DG | P-Cresol | GABRB1  | 80.882 |
| DG | P-Cresol | GABRA3  | 80.882 |
| DG | P-Cresol | ACHE    | 80.882 |
| DG | P-Cresol | GABRA6  | 80.882 |
| DG | P-Cresol | PDE3B   | 55.444 |
| DG | P-Cresol | SCN1A   | 23     |
| DG | P-Cresol | SLC5A7  | 22.373 |
| DG | P-Cresol | SIRT2   | 22.373 |
| DG | P-Cresol | HCN4    | 22.373 |
| DG | P-Cresol | NCKAP1L | 22.373 |
| DG | P-Cresol | EIF2AK1 | 22.373 |
| DG | P-Cresol | PRSS12  | 22.373 |
| DG | P-Cresol | FGFR2   | 22.373 |
| DG | P-Cresol | IL1RN   | 22.373 |
| DG | P-Cresol | IFNG    | 22.373 |
| DG | P-Cresol | TIRAP   | 22.373 |
| DG | P-Cresol | ENPP6   | 22.373 |
| DG | P-Cresol | IL6     | 22.373 |
| DG | P-Cresol | NOD2    | 22.373 |
| DG | P-Cresol | IL4     | 22.373 |
| DG | P-Cresol | CHKA    | 22.373 |
| DG | P-Cresol | FAS     | 22.373 |
| DG | P-Cresol | GABRG3  | 80.882 |
| DG | P-Cresol | GABRG1  | 80.882 |
| DG | P-Cresol | SCN4A   | 80.882 |
| DG | P-Cresol | GABRA1  | 80.882 |
| DG | P-Cresol | PDE4D   | 55.444 |
| DG | P-Cresol | SCN3A   | 23     |
| DG | P-Cresol | SEMA4D  | 22.373 |
| DG | P-Cresol | MIF     | 22.373 |
| DG | P-Cresol | FASLG   | 22.373 |
| DG | P-Cresol | CRP     | 22.373 |
| DG | P-Cresol | IL1B    | 22.373 |
| DG | P-Cresol | SLC44A4 | 22.373 |
| DG | P-Cresol | ANGPT1  | 22.373 |
| DG | P-Cresol | PLN     | 22.373 |
| DG | P-Cresol | HRC     | 22.373 |

|    |                       |          |        |
|----|-----------------------|----------|--------|
| DG | P-Cresol              | ROCK2    | 22.373 |
| DG | P-Cresol              | CAMK2D   | 22.373 |
| DG | P-Cresol              | ROCK1    | 22.373 |
| DG | P-Cresol              | BMP4     | 22.373 |
| DG | P-Cresol              | AGRN     | 22.373 |
| DG | P-Cresol              | PDE2A    | 22.373 |
| DG | P-Cresol              | GRIN1    | 22.373 |
| DG | Vitamin B1            | SLC19A2  | 124    |
| DG | Vitamin B1            | SLC5A6   | 22.373 |
| DG | Vitamin B1            | SLC25A32 | 22.373 |
| DG | Vitamin B1            | ACPP     | 22.373 |
| DG | Vitamin B1            | TPK1     | 124    |
| DG | Vitamin B1            | SLC38A3  | 22.373 |
| DG | Vitamin B1            | SLC23A1  | 22.373 |
| DG | Vitamin B1            | TKTL1    | 22.373 |
| DG | Vitamin B1            | THTPA    | 55.444 |
| DG | Vitamin B1            | SLC26A6  | 22.373 |
| DG | Vitamin B1            | SLC38A7  | 22.373 |
| DG | Vitamin B1            | SLC23A2  | 22.373 |
| DG | Vitamin B1            | CERS2    | 26.373 |
| DG | Vitamin B1            | SLC35F3  | 22.373 |
| DG | Vitamin B1            | FOLR1    | 22.373 |
| DG | Vitamin B1            | SLC46A1  | 22.373 |
| DG | Vitamin B1            | FOLR2    | 22.373 |
| DG | Vitamin B1            | SLC19A1  | 22.373 |
| DG | Vitamin B1            | C2orf83  | 22.373 |
| DG | Vitamin B1            | SLC19A3  | 22.373 |
| DG | 2-Methyl-3-Buten-2-Ol | ESR1     | 80.882 |
| DG | 2-Methyl-3-Buten-2-Ol | PHB      | 22.373 |
| DG | 2-Methyl-3-Buten-2-Ol | ESR2     | 22.373 |
| DG | 2-Methyl-3-Buten-2-Ol | FGFR2    | 22.373 |
| DG | 2-Methyl-3-Buten-2-Ol | GPER1    | 22.373 |
| DG | 2-Methyl-3-Buten-2-Ol | TRIM24   | 22.373 |
| DG | 2-Methyl-3-Buten-2-Ol | PGR      | 80.882 |
| DG | 2-Methyl-3-Buten-2-Ol | TOX3     | 22.373 |
| DG | 2-Methyl-3-Buten-2-Ol | NEDD4    | 22.373 |
| DG | 2-Methyl-3-Buten-2-Ol | SRC      | 22.373 |
| DG | 2-Methyl-3-Buten-2-Ol | WNT5A    | 22.373 |
| DG | 2-Methyl-3-Buten-2-Ol | WNT4     | 55.444 |
| DG | 2-Methyl-3-Buten-2-Ol | TGFB1    | 22.373 |
| DG | 2-Methyl-3-Buten-2-Ol | SHH      | 22.373 |
| DG | 2-Methyl-3-Buten-2-Ol | UBR5     | 22.373 |
| DG | 2-Methyl-3-Buten-2-Ol | SOX9     | 22.373 |
| DG | 2-Methyl-3-Buten-2-Ol | TFAP2C   | 22.373 |
| DG | 2-Methyl-3-Buten-2-Ol | MED1     | 22.373 |
| DG | 2-Methyl-3-Buten-2-Ol | SERPINB3 | 22.373 |
| DG | 2-Methyl-3-Buten-2-Ol | AREG     | 22.373 |
| DG | 2-Methyl-3-Buten-2-Ol | PDGFB    | 22.373 |
| DG | 2-Methyl-3-Buten-2-Ol | TNFSF11  | 22.373 |
| DG | 2-Methyl-3-Buten-2-Ol | NKX3-1   | 22.373 |
| DG | 2-Methyl-3-Buten-2-Ol | LEF1     | 22.373 |

|    |                       |         |        |
|----|-----------------------|---------|--------|
| DG | 2-Methyl-3-Buten-2-ol | CD34    | 22.373 |
| DG | 2-Methyl-3-Buten-2-ol | VDR     | 22.373 |
| DG | 1,2-Dimethylbenzene   | KCND1   | 80.882 |
| DG | 1,2-Dimethylbenzene   | GAMT    | 80.882 |
| DG | 1,2-Dimethylbenzene   | CAT     | 80.882 |
| DG | 1,2-Dimethylbenzene   | KCNC1   | 80.882 |
| DG | 1,2-Dimethylbenzene   | KCND2   | 80.882 |
| DG | 1,2-Dimethylbenzene   | KCND3   | 80.882 |
| DG | 1,2-Dimethylbenzene   | KCNQ1   | 55.444 |
| DG | 1,2-Dimethylbenzene   | CYGB    | 22.373 |
| DG | 1,2-Dimethylbenzene   | IGF1    | 22.373 |
| DG | 1,2-Dimethylbenzene   | EDN1    | 22.373 |
| DG | 1,2-Dimethylbenzene   | CNTNAP4 | 22.373 |
| DG | 1,2-Dimethylbenzene   | GRIN2A  | 22.373 |
| DG | 1,2-Dimethylbenzene   | SPARC   | 22.373 |
| DG | 1,2-Dimethylbenzene   | CRLF1   | 22.373 |
| DG | 1,2-Dimethylbenzene   | ALDH1B1 | 22.373 |
| DG | 1,2-Dimethylbenzene   | DARS    | 22.373 |
| DG | 1,2-Dimethylbenzene   | MIP     | 22.373 |
| DG | 1,2-Dimethylbenzene   | STX1A   | 22.373 |
| DG | 1,2-Dimethylbenzene   | NRXN2   | 22.373 |
| DG | 1,2-Dimethylbenzene   | DAB2IP  | 22.373 |
| DG | 1,2-Dimethylbenzene   | KCNA3   | 80.882 |
| DG | 1,2-Dimethylbenzene   | KCNC3   | 80.882 |
| DG | 1,2-Dimethylbenzene   | KCNB1   | 80.882 |
| DG | 1,2-Dimethylbenzene   | ADH1C   | 80.882 |
| DG | 1,2-Dimethylbenzene   | ALDH2   | 80.882 |
| DG | 1,2-Dimethylbenzene   | GUCY1B3 | 55.444 |
| DG | 1,2-Dimethylbenzene   | FBP1    | 22.373 |
| DG | 1,2-Dimethylbenzene   | NRXN3   | 22.373 |
| DG | 1,2-Dimethylbenzene   | SHANK3  | 22.373 |
| DG | 1,2-Dimethylbenzene   | OXT     | 22.373 |
| DG | 1,2-Dimethylbenzene   | RNASE4  | 22.373 |
| DG | 1,2-Dimethylbenzene   | SLC17A7 | 22.373 |
| DG | 1,2-Dimethylbenzene   | SORCS3  | 22.373 |
| DG | 1,2-Dimethylbenzene   | FADD    | 22.373 |
| DG | 1,2-Dimethylbenzene   | LEP     | 22.373 |
| DG | 1,2-Dimethylbenzene   | ANK3    | 22.373 |
| DG | 1,2-Dimethylbenzene   | RYR3    | 22.373 |
| DG | 1,2-Dimethylbenzene   | PAXBP1  | 22.373 |
| DG | 1,2-Dimethylbenzene   | ADORA1  | 22.373 |
| DG | 1,2-Dimethylbenzene   | CYP2E1  | 22.373 |
| DG | 1,2-Dimethylbenzene   | PRKAB1  | 80.882 |
| DG | 1,2-Dimethylbenzene   | KCNA1   | 80.882 |
| DG | 1,2-Dimethylbenzene   | ADH1B   | 80.882 |
| DG | 1,2-Dimethylbenzene   | KCNB2   | 80.882 |
| DG | 1,2-Dimethylbenzene   | KCNA4   | 80.882 |
| DG | 1,2-Dimethylbenzene   | GATM    | 55.444 |
| DG | 1,2-Dimethylbenzene   | DGKI    | 22.373 |
| DG | 1,2-Dimethylbenzene   | LRRC4B  | 22.373 |
| DG | 1,2-Dimethylbenzene   | ACY3    | 22.373 |

|    |                     |         |        |
|----|---------------------|---------|--------|
| DG | 1,2-Dimethylbenzene | MAGI2   | 22.373 |
| DG | 1,2-Dimethylbenzene | RAB3A   | 22.373 |
| DG | 1,2-Dimethylbenzene | CYP11A1 | 22.373 |
| DG | 1,2-Dimethylbenzene | RNASE8  | 22.373 |
| DG | 1,2-Dimethylbenzene | SNTG2   | 22.373 |
| DG | 1,2-Dimethylbenzene | NLGN1   | 22.373 |
| DG | 1,2-Dimethylbenzene | KCNE5   | 22.373 |
| DG | 1,2-Dimethylbenzene | ZPR1    | 22.373 |
| DG | 1,2-Dimethylbenzene | PAX7    | 22.373 |
| DG | 1,2-Dimethylbenzene | ADH4    | 22.373 |
| DG | 1,2-Dimethylbenzene | ACY1    | 22.373 |
| DG | 1,2-Dimethylbenzene | ADH1A   | 80.882 |
| DG | 1,2-Dimethylbenzene | KCNA2   | 80.882 |
| DG | 1,2-Dimethylbenzene | DLG4    | 80.882 |
| DG | 1,2-Dimethylbenzene | KCNA5   | 80.882 |
| DG | 1,2-Dimethylbenzene | KCNA7   | 80.882 |
| DG | 1,2-Dimethylbenzene | KCNK4   | 55.444 |
| DG | 1,2-Dimethylbenzene | ADH7    | 22.373 |
| DG | 1,2-Dimethylbenzene | AQP8    | 22.373 |
| DG | 1,2-Dimethylbenzene | ASPA    | 22.373 |
| DG | 1,2-Dimethylbenzene | APOE    | 22.373 |
| DG | 1,2-Dimethylbenzene | MC4R    | 22.373 |
| DG | 1,2-Dimethylbenzene | SCN5A   | 22.373 |
| DG | 1,2-Dimethylbenzene | KCNIP2  | 22.373 |
| DG | 1,2-Dimethylbenzene | SCGB1A1 | 22.373 |
| DG | 1,2-Dimethylbenzene | CACNA1D | 22.373 |
| DG | 1,2-Dimethylbenzene | PPARD   | 22.373 |
| DG | 1,2-Dimethylbenzene | ALDH3B1 | 22.373 |
| DG | 1,2-Dimethylbenzene | ALDH3B2 | 22.373 |
| DG | 1,2-Dimethylbenzene | GJA5    | 22.373 |
| DG | 1,2-Dimethylbenzene | KCNA10  | 80.882 |
| DG | 1,2-Dimethylbenzene | TPO     | 80.882 |
| DG | 1,2-Dimethylbenzene | KCNC2   | 80.882 |
| DG | 1,2-Dimethylbenzene | RNASE1  | 80.882 |
| DG | 1,2-Dimethylbenzene | KCNA6   | 80.882 |
| DG | 1,2-Dimethylbenzene | IYD     | 55.444 |
| DG | 1,2-Dimethylbenzene | NFIB    | 22.373 |
| DG | 1,2-Dimethylbenzene | ARX     | 22.373 |
| DG | 1,2-Dimethylbenzene | NRXN1   | 22.373 |
| DG | 1,2-Dimethylbenzene | SOX15   | 22.373 |
| DG | 1,2-Dimethylbenzene | IL1B    | 22.373 |
| DG | 1,2-Dimethylbenzene | SCN10A  | 22.373 |
| DG | 1,2-Dimethylbenzene | GPX7    | 22.373 |
| DG | 1,2-Dimethylbenzene | OXTR    | 22.373 |
| DG | 1,2-Dimethylbenzene | RAPGEF2 | 22.373 |
| DG | 1,2-Dimethylbenzene | NKX2-1  | 22.373 |
| DG | 1,2-Dimethylbenzene | NPPA    | 22.373 |
| DG | 1,2-Dimethylbenzene | RNASE2  | 22.373 |
| DG | 1,2-Dimethylbenzene | FAS     | 22.373 |
| DG | Cnidilide           | CHRM3   | 80.882 |
| DG | Cnidilide           | AR      | 48     |

|    |                 |         |        |
|----|-----------------|---------|--------|
| DG | Cnidilide       | HDAC2   | 48     |
| DG | Cnidilide       | CHRM5   | 22.373 |
| DG | Cnidilide       | CHRM4   | 22.373 |
| DG | Cnidilide       | CHRM1   | 80.882 |
| DG | Cnidilide       | NR3C1   | 48     |
| DG | Cnidilide       | NR3C2   | 48     |
| DG | Cnidilide       | GNA15   | 22.373 |
| DG | Cnidilide       | CHRM2   | 80.882 |
| DG | Cnidilide       | HMGCR   | 48     |
| DG | Cnidilide       | ARFGEF2 | 22.373 |
| DG | Cnidilide       | P2RX1   | 22.373 |
| DG | Cnidilide       | ESR1    | 48     |
| DG | Cnidilide       | ITGB2   | 48     |
| DG | Cnidilide       | DOCK5   | 22.373 |
| DG | Cnidilide       | DOCK4   | 22.373 |
| DG | Cnidilide       | PGR     | 48     |
| DG | Cnidilide       | ITGAL   | 48     |
| DG | Cnidilide       | NTSR1   | 22.373 |
| DG | Cnidilide       | MAP2K1  | 22.373 |
| DG | Beta-Acoradiene | KCND1   | 80.882 |
| DG | Beta-Acoradiene | GAMT    | 80.882 |
| DG | Beta-Acoradiene | CAT     | 80.882 |
| DG | Beta-Acoradiene | KCNC1   | 80.882 |
| DG | Beta-Acoradiene | KCND2   | 80.882 |
| DG | Beta-Acoradiene | KCND3   | 80.882 |
| DG | Beta-Acoradiene | KCNQ1   | 55.444 |
| DG | Beta-Acoradiene | NR3C2   | 48     |
| DG | Beta-Acoradiene | CYGB    | 22.373 |
| DG | Beta-Acoradiene | IGF1    | 22.373 |
| DG | Beta-Acoradiene | EDN1    | 22.373 |
| DG | Beta-Acoradiene | CNTNAP4 | 22.373 |
| DG | Beta-Acoradiene | GRIN2A  | 22.373 |
| DG | Beta-Acoradiene | SPARC   | 22.373 |
| DG | Beta-Acoradiene | CRLF1   | 22.373 |
| DG | Beta-Acoradiene | ALDH1B1 | 22.373 |
| DG | Beta-Acoradiene | DARS    | 22.373 |
| DG | Beta-Acoradiene | MIP     | 22.373 |
| DG | Beta-Acoradiene | STX1A   | 22.373 |
| DG | Beta-Acoradiene | NRXN2   | 22.373 |
| DG | Beta-Acoradiene | DAB2IP  | 22.373 |
| DG | Beta-Acoradiene | KCNA3   | 80.882 |
| DG | Beta-Acoradiene | KCNC3   | 80.882 |
| DG | Beta-Acoradiene | KCNB1   | 80.882 |
| DG | Beta-Acoradiene | ADH1C   | 80.882 |
| DG | Beta-Acoradiene | ALDH2   | 80.882 |
| DG | Beta-Acoradiene | GUCY1B3 | 55.444 |
| DG | Beta-Acoradiene | CYP17A1 | 48     |
| DG | Beta-Acoradiene | FBP1    | 22.373 |
| DG | Beta-Acoradiene | NRXN3   | 22.373 |
| DG | Beta-Acoradiene | SHANK3  | 22.373 |
| DG | Beta-Acoradiene | OXT     | 22.373 |

|    |                 |         |        |
|----|-----------------|---------|--------|
| DG | Beta-Acoradiene | RNASE4  | 22.373 |
| DG | Beta-Acoradiene | SLC17A7 | 22.373 |
| DG | Beta-Acoradiene | SORCS3  | 22.373 |
| DG | Beta-Acoradiene | FADD    | 22.373 |
| DG | Beta-Acoradiene | LEP     | 22.373 |
| DG | Beta-Acoradiene | ANK3    | 22.373 |
| DG | Beta-Acoradiene | RYR3    | 22.373 |
| DG | Beta-Acoradiene | PAXBP1  | 22.373 |
| DG | Beta-Acoradiene | ADORA1  | 22.373 |
| DG | Beta-Acoradiene | CYP2E1  | 22.373 |
| DG | Beta-Acoradiene | PRKAB1  | 80.882 |
| DG | Beta-Acoradiene | KCNA1   | 80.882 |
| DG | Beta-Acoradiene | ADH1B   | 80.882 |
| DG | Beta-Acoradiene | KCNB2   | 80.882 |
| DG | Beta-Acoradiene | KCNA4   | 80.882 |
| DG | Beta-Acoradiene | GATM    | 55.444 |
| DG | Beta-Acoradiene | ESR1    | 48     |
| DG | Beta-Acoradiene | DGKI    | 22.373 |
| DG | Beta-Acoradiene | LRRC4B  | 22.373 |
| DG | Beta-Acoradiene | ACY3    | 22.373 |
| DG | Beta-Acoradiene | MAGI2   | 22.373 |
| DG | Beta-Acoradiene | RAB3A   | 22.373 |
| DG | Beta-Acoradiene | CYP11A1 | 22.373 |
| DG | Beta-Acoradiene | RNASE8  | 22.373 |
| DG | Beta-Acoradiene | SNTG2   | 22.373 |
| DG | Beta-Acoradiene | NLGN1   | 22.373 |
| DG | Beta-Acoradiene | KCNE5   | 22.373 |
| DG | Beta-Acoradiene | ZPR1    | 22.373 |
| DG | Beta-Acoradiene | PAX7    | 22.373 |
| DG | Beta-Acoradiene | ADH4    | 22.373 |
| DG | Beta-Acoradiene | ACY1    | 22.373 |
| DG | Beta-Acoradiene | ADH1A   | 80.882 |
| DG | Beta-Acoradiene | KCNA2   | 80.882 |
| DG | Beta-Acoradiene | DLG4    | 80.882 |
| DG | Beta-Acoradiene | KCNA5   | 80.882 |
| DG | Beta-Acoradiene | KCNA7   | 80.882 |
| DG | Beta-Acoradiene | KCNK4   | 55.444 |
| DG | Beta-Acoradiene | PGR     | 48     |
| DG | Beta-Acoradiene | ADH7    | 22.373 |
| DG | Beta-Acoradiene | AQP8    | 22.373 |
| DG | Beta-Acoradiene | ASPA    | 22.373 |
| DG | Beta-Acoradiene | APOE    | 22.373 |
| DG | Beta-Acoradiene | MC4R    | 22.373 |
| DG | Beta-Acoradiene | SCN5A   | 22.373 |
| DG | Beta-Acoradiene | KCNIP2  | 22.373 |
| DG | Beta-Acoradiene | SCGB1A1 | 22.373 |
| DG | Beta-Acoradiene | CACNA1D | 22.373 |
| DG | Beta-Acoradiene | PPARD   | 22.373 |
| DG | Beta-Acoradiene | ALDH3B1 | 22.373 |
| DG | Beta-Acoradiene | ALDH3B2 | 22.373 |
| DG | Beta-Acoradiene | GJA5    | 22.373 |

|    |                 |         |        |
|----|-----------------|---------|--------|
| DG | Beta-Acoradiene | KCNA10  | 80.882 |
| DG | Beta-Acoradiene | TPO     | 80.882 |
| DG | Beta-Acoradiene | KCNC2   | 80.882 |
| DG | Beta-Acoradiene | RNASE1  | 80.882 |
| DG | Beta-Acoradiene | KCNA6   | 80.882 |
| DG | Beta-Acoradiene | IYD     | 55.444 |
| DG | Beta-Acoradiene | OPRK1   | 48     |
| DG | Beta-Acoradiene | NFIB    | 22.373 |
| DG | Beta-Acoradiene | ARX     | 22.373 |
| DG | Beta-Acoradiene | NRXN1   | 22.373 |
| DG | Beta-Acoradiene | SOX15   | 22.373 |
| DG | Beta-Acoradiene | IL1B    | 22.373 |
| DG | Beta-Acoradiene | SCN10A  | 22.373 |
| DG | Beta-Acoradiene | GPX7    | 22.373 |
| DG | Beta-Acoradiene | OXTR    | 22.373 |
| DG | Beta-Acoradiene | RAPGEF2 | 22.373 |
| DG | Beta-Acoradiene | NKX2-1  | 22.373 |
| DG | Beta-Acoradiene | NPPA    | 22.373 |
| DG | Beta-Acoradiene | RNASE2  | 22.373 |
| DG | Beta-Acoradiene | FAS     | 22.373 |
| DG | Decanal         | SCN11A  | 48     |
| DG | Decanal         | SCN3A   | 48     |
| DG | Decanal         | ALDH5A1 | 48     |
| DG | Decanal         | SCN4A   | 48     |
| DG | Decanal         | SCN1B   | 48     |
| DG | Decanal         | SCN2B   | 48     |
| DG | Decanal         | SCN7A   | 48     |
| DG | Decanal         | SCN2A   | 48     |
| DG | Decanal         | SCN4B   | 48     |
| DG | Decanal         | OGDH    | 48     |
| DG | Decanal         | ABAT    | 48     |
| DG | Decanal         | SCN5A   | 48     |
| DG | Decanal         | HDAC9   | 48     |
| DG | Decanal         | SRD5A2  | 48     |
| DG | Decanal         | HDAC2   | 48     |
| DG | Decanal         | SCN1A   | 48     |
| DG | Decanal         | SCN10A  | 48     |
| DG | Decanal         | TYR     | 48     |
| DG | Decanal         | ACADSB  | 48     |
| DG | Decanal         | SCN3B   | 48     |
| DG | Decanal         | AKR1D1  | 48     |
| DG | Decanal         | SCN9A   | 48     |
| DG | Decanal         | SCN8A   | 48     |
| DG | Brefeldin A     | HMGCR   | 80.882 |
| DG | Brefeldin A     | PGR     | 48     |
| DG | Brefeldin A     | SIX1    | 22.373 |
| DG | Brefeldin A     | CAMK2A  | 22.373 |
| DG | Brefeldin A     | WNT10B  | 22.373 |
| DG | Brefeldin A     | CDC42   | 22.373 |
| DG | Brefeldin A     | GNAS    | 22.373 |
| DG | Brefeldin A     | ITGB2   | 80.882 |



|    |              |         |        |
|----|--------------|---------|--------|
| DG | Brefeldin A  | AR      | 48     |
| DG | Brefeldin A  | SIX4    | 22.373 |
| DG | Brefeldin A  | CRP     | 22.373 |
| DG | Brefeldin A  | TIGAR   | 22.373 |
| DG | Brefeldin A  | CTNNB1  | 22.373 |
| DG | Brefeldin A  | NFX1    | 22.373 |
| DG | Brefeldin A  | ITGAL   | 80.882 |
| DG | Brefeldin A  | HDAC1   | 23     |
| DG | Brefeldin A  | SPI1    | 22.373 |
| DG | Brefeldin A  | ARID1A  | 22.373 |
| DG | Brefeldin A  | PF4     | 22.373 |
| DG | Brefeldin A  | EDA     | 22.373 |
| DG | Brefeldin A  | HDAC2   | 80.882 |
| DG | Brefeldin A  | LTK     | 22.373 |
| DG | Brefeldin A  | UBE2B   | 22.373 |
| DG | Brefeldin A  | 8-Mar   | 22.373 |
| DG | Brefeldin A  | CAMK2D  | 22.373 |
| DG | Brefeldin A  | ADORA1  | 22.373 |
| DG | Brefeldin A  | ESR1    | 48     |
| DG | Brefeldin A  | SIRT1   | 22.373 |
| DG | Brefeldin A  | TP53    | 22.373 |
| DG | Brefeldin A  | INS     | 22.373 |
| DG | Brefeldin A  | IL10    | 22.373 |
| DG | Brefeldin A  | CLEC4M  | 22.373 |
| DG | Stigmasterol | KCND1   | 80.882 |
| DG | Stigmasterol | GAMT    | 80.882 |
| DG | Stigmasterol | CAT     | 80.882 |
| DG | Stigmasterol | KCNC1   | 80.882 |
| DG | Stigmasterol | KCND2   | 80.882 |
| DG | Stigmasterol | KCND3   | 80.882 |
| DG | Stigmasterol | KCNQ1   | 55.444 |
| DG | Stigmasterol | RDH13   | 48     |
| DG | Stigmasterol | ALDH1A3 | 48     |
| DG | Stigmasterol | ALDH1A1 | 48     |
| DG | Stigmasterol | ALDH1A2 | 48     |
| DG | Stigmasterol | NFIB    | 22.373 |
| DG | Stigmasterol | ARX     | 22.373 |
| DG | Stigmasterol | NRXN1   | 22.373 |
| DG | Stigmasterol | SOX15   | 22.373 |
| DG | Stigmasterol | IL1B    | 22.373 |
| DG | Stigmasterol | SCN10A  | 22.373 |
| DG | Stigmasterol | GPX7    | 22.373 |
| DG | Stigmasterol | OXTR    | 22.373 |
| DG | Stigmasterol | RAPGEF2 | 22.373 |
| DG | Stigmasterol | NKX2-1  | 22.373 |
| DG | Stigmasterol | NPPA    | 22.373 |
| DG | Stigmasterol | RNASE2  | 22.373 |
| DG | Stigmasterol | FAS     | 22.373 |
| DG | Stigmasterol | KCNA3   | 80.882 |
| DG | Stigmasterol | KCNC3   | 80.882 |
| DG | Stigmasterol | KCNB1   | 80.882 |

|    |              |         |        |
|----|--------------|---------|--------|
| DG | Stigmasterol | ADH1C   | 80.882 |
| DG | Stigmasterol | ALDH2   | 80.882 |
| DG | Stigmasterol | GUCY1B3 | 55.444 |
| DG | Stigmasterol | RDH11   | 48     |
| DG | Stigmasterol | DHRS3   | 48     |
| DG | Stigmasterol | RDH12   | 48     |
| DG | Stigmasterol | RLBP1   | 48     |
| DG | Stigmasterol | NR3C2   | 48     |
| DG | Stigmasterol | CYGB    | 22.373 |
| DG | Stigmasterol | IGF1    | 22.373 |
| DG | Stigmasterol | EDN1    | 22.373 |
| DG | Stigmasterol | CNTNAP4 | 22.373 |
| DG | Stigmasterol | GRIN2A  | 22.373 |
| DG | Stigmasterol | SPARC   | 22.373 |
| DG | Stigmasterol | CRLF1   | 22.373 |
| DG | Stigmasterol | ALDH1B1 | 22.373 |
| DG | Stigmasterol | DARS    | 22.373 |
| DG | Stigmasterol | MIP     | 22.373 |
| DG | Stigmasterol | STX1A   | 22.373 |
| DG | Stigmasterol | NRXN2   | 22.373 |
| DG | Stigmasterol | DAB2IP  | 22.373 |
| DG | Stigmasterol | PRKAB1  | 80.882 |
| DG | Stigmasterol | KCNA1   | 80.882 |
| DG | Stigmasterol | ADH1B   | 80.882 |
| DG | Stigmasterol | KCNB2   | 80.882 |
| DG | Stigmasterol | KCNA4   | 80.882 |
| DG | Stigmasterol | GATM    | 55.444 |
| DG | Stigmasterol | RBP3    | 48     |
| DG | Stigmasterol | RDH5    | 48     |
| DG | Stigmasterol | OPRK1   | 48     |
| DG | Stigmasterol | RDH14   | 48     |
| DG | Stigmasterol | FBP1    | 22.373 |
| DG | Stigmasterol | NRXN3   | 22.373 |
| DG | Stigmasterol | SHANK3  | 22.373 |
| DG | Stigmasterol | OXT     | 22.373 |
| DG | Stigmasterol | RNASE4  | 22.373 |
| DG | Stigmasterol | SLC17A7 | 22.373 |
| DG | Stigmasterol | SORCS3  | 22.373 |
| DG | Stigmasterol | FADD    | 22.373 |
| DG | Stigmasterol | LEP     | 22.373 |
| DG | Stigmasterol | ANK3    | 22.373 |
| DG | Stigmasterol | RYR3    | 22.373 |
| DG | Stigmasterol | PAXBP1  | 22.373 |
| DG | Stigmasterol | ADORA1  | 22.373 |
| DG | Stigmasterol | CYP2E1  | 22.373 |
| DG | Stigmasterol | ADH1A   | 80.882 |
| DG | Stigmasterol | KCNA2   | 80.882 |
| DG | Stigmasterol | DLG4    | 80.882 |
| DG | Stigmasterol | KCNA5   | 80.882 |
| DG | Stigmasterol | KCNA7   | 80.882 |
| DG | Stigmasterol | KCNK4   | 55.444 |

|    |              |         |        |
|----|--------------|---------|--------|
| DG | Stigmasterol | RETSAT  | 48     |
| DG | Stigmasterol | ESR1    | 48     |
| DG | Stigmasterol | DHRS4   | 48     |
| DG | Stigmasterol | RDH8    | 48     |
| DG | Stigmasterol | DGKI    | 22.373 |
| DG | Stigmasterol | LRRRC4B | 22.373 |
| DG | Stigmasterol | ACY3    | 22.373 |
| DG | Stigmasterol | MAGI2   | 22.373 |
| DG | Stigmasterol | RAB3A   | 22.373 |
| DG | Stigmasterol | CYP11A1 | 22.373 |
| DG | Stigmasterol | RNASE8  | 22.373 |
| DG | Stigmasterol | SNTG2   | 22.373 |
| DG | Stigmasterol | NLGN1   | 22.373 |
| DG | Stigmasterol | KCNE5   | 22.373 |
| DG | Stigmasterol | ZPR1    | 22.373 |
| DG | Stigmasterol | PAX7    | 22.373 |
| DG | Stigmasterol | ADH4    | 22.373 |
| DG | Stigmasterol | ACY1    | 22.373 |
| DG | Stigmasterol | KCNA10  | 80.882 |
| DG | Stigmasterol | TPO     | 80.882 |
| DG | Stigmasterol | KCNC2   | 80.882 |
| DG | Stigmasterol | RNASE1  | 80.882 |
| DG | Stigmasterol | KCNA6   | 80.882 |
| DG | Stigmasterol | IYD     | 55.444 |
| DG | Stigmasterol | CYP17A1 | 48     |
| DG | Stigmasterol | PGR     | 48     |
| DG | Stigmasterol | RBP1    | 48     |
| DG | Stigmasterol | LRAT    | 48     |
| DG | Stigmasterol | ADH7    | 22.373 |
| DG | Stigmasterol | AQP8    | 22.373 |
| DG | Stigmasterol | ASPA    | 22.373 |
| DG | Stigmasterol | APOE    | 22.373 |
| DG | Stigmasterol | MC4R    | 22.373 |
| DG | Stigmasterol | SCN5A   | 22.373 |
| DG | Stigmasterol | KCNIP2  | 22.373 |
| DG | Stigmasterol | SCGB1A1 | 22.373 |
| DG | Stigmasterol | CACNA1D | 22.373 |
| DG | Stigmasterol | PPARD   | 22.373 |
| DG | Stigmasterol | ALDH3B1 | 22.373 |
| DG | Stigmasterol | ALDH3B2 | 22.373 |
| DG | Stigmasterol | GJA5    | 22.373 |
| DG | Nonanal      | SCN11A  | 48     |
| DG | Nonanal      | SCN3A   | 48     |
| DG | Nonanal      | ALDH5A1 | 48     |
| DG | Nonanal      | SCN4A   | 48     |
| DG | Nonanal      | SCN1B   | 48     |
| DG | Nonanal      | SCN2B   | 48     |
| DG | Nonanal      | SCN7A   | 48     |
| DG | Nonanal      | SCN2A   | 48     |
| DG | Nonanal      | SCN4B   | 48     |
| DG | Nonanal      | OGDH    | 48     |

|    |               |         |         |
|----|---------------|---------|---------|
| DG | Nonanal       | ABAT    | 48      |
| DG | Nonanal       | SCN5A   | 48      |
| DG | Nonanal       | HDAC9   | 48      |
| DG | Nonanal       | SRD5A2  | 48      |
| DG | Nonanal       | HDAC2   | 48      |
| DG | Nonanal       | SCN1A   | 48      |
| DG | Nonanal       | SCN10A  | 48      |
| DG | Nonanal       | TYR     | 48      |
| DG | Nonanal       | ACADSB  | 48      |
| DG | Nonanal       | SCN3B   | 48      |
| DG | Nonanal       | AKR1D1  | 48      |
| DG | Nonanal       | SCN9A   | 48      |
| DG | Nonanal       | SCN8A   | 48      |
| DG | Vitamin B12   | MUT     | 686     |
| DG | Vitamin B12   | MTHFR   | 686     |
| DG | Vitamin B12   | CBS     | 55.444  |
| DG | Vitamin B12   | LSM8    | 26.373  |
| DG | Vitamin B12   | BHMT2   | 22.373  |
| DG | Vitamin B12   | AHCYL2  | 22.373  |
| DG | Vitamin B12   | AHCYL1  | 22.373  |
| DG | Vitamin B12   | MCEE    | 22.373  |
| DG | Vitamin B12   | MTRR    | 686     |
| DG | Vitamin B12   | TCN1    | 122.778 |
| DG | Vitamin B12   | CEBPA   | 55.444  |
| DG | Vitamin B12   | PCBD1   | 26.373  |
| DG | Vitamin B12   | PCCA    | 22.373  |
| DG | Vitamin B12   | MRI1    | 22.373  |
| DG | Vitamin B12   | AHCY    | 22.373  |
| DG | Vitamin B12   | MTR     | 686     |
| DG | Vitamin B12   | MMAB    | 122.778 |
| DG | Vitamin B12   | WDHD1   | 55.444  |
| DG | Vitamin B12   | ADORA2A | 23      |
| DG | Vitamin B12   | POR     | 22.373  |
| DG | Vitamin B12   | NDOR1   | 22.373  |
| DG | Vitamin B12   | PCCB    | 22.373  |
| DG | Vitamin B12   | MMACHC  | 686     |
| DG | Vitamin B12   | CUBN    | 122.778 |
| DG | Vitamin B12   | TSC22D1 | 26.373  |
| DG | Vitamin B12   | DNMT1   | 23      |
| DG | Vitamin B12   | NOS2    | 22.373  |
| DG | Vitamin B12   | BHMT    | 22.373  |
| DG | Vitamin B12   | NOS3    | 22.373  |
| DG | Vitamin B12   | MMAA    | 686     |
| DG | Vitamin B12   | AMN     | 122.778 |
| DG | Vitamin B12   | DYNLL1  | 26.373  |
| DG | Vitamin B12   | APIP    | 22.373  |
| DG | Vitamin B12   | ACADS   | 22.373  |
| DG | Vitamin B12   | SUPV3L1 | 22.373  |
| DG | Vitamin B12   | NOS1    | 22.373  |
| DG | 1-Hexadecanol | TRPV3   | 122.778 |
| DG | 1-Hexadecanol | GRIA4   | 80.882  |

|    |               |         |         |
|----|---------------|---------|---------|
| DG | 1-Hexadecanol | CHRN3   | 80.882  |
| DG | 1-Hexadecanol | GABRG3  | 80.882  |
| DG | 1-Hexadecanol | GABRA3  | 80.882  |
| DG | 1-Hexadecanol | CHRNA10 | 80.882  |
| DG | 1-Hexadecanol | CACNA1C | 80.882  |
| DG | 1-Hexadecanol | CHRNA2  | 80.882  |
| DG | 1-Hexadecanol | HTR3B   | 80.882  |
| DG | 1-Hexadecanol | GABRA6  | 80.882  |
| DG | 1-Hexadecanol | CHRNA5  | 80.882  |
| DG | 1-Hexadecanol | CACNG1  | 80.882  |
| DG | 1-Hexadecanol | DMTN    | 55.444  |
| DG | 1-Hexadecanol | SCN1A   | 48      |
| DG | 1-Hexadecanol | SCN10A  | 48      |
| DG | 1-Hexadecanol | TYR     | 48      |
| DG | 1-Hexadecanol | ACADSB  | 48      |
| DG | 1-Hexadecanol | GLRA3   | 23      |
| DG | 1-Hexadecanol | NAV2    | 22.373  |
| DG | 1-Hexadecanol | CACNA1A | 22.373  |
| DG | 1-Hexadecanol | MTNR1B  | 22.373  |
| DG | 1-Hexadecanol | FLOT1   | 22.373  |
| DG | 1-Hexadecanol | ADRA1D  | 22.373  |
| DG | 1-Hexadecanol | MAOA    | 22.373  |
| DG | 1-Hexadecanol | RAB3B   | 22.373  |
| DG | 1-Hexadecanol | DRD4    | 22.373  |
| DG | 1-Hexadecanol | AOC3    | 22.373  |
| DG | 1-Hexadecanol | RNF207  | 22.373  |
| DG | 1-Hexadecanol | NPPA    | 22.373  |
| DG | 1-Hexadecanol | EPHB1   | 22.373  |
| DG | 1-Hexadecanol | PINK1   | 22.373  |
| DG | 1-Hexadecanol | KISS1   | 22.373  |
| DG | 1-Hexadecanol | OPRK1   | 122.778 |
| DG | 1-Hexadecanol | GABRA2  | 80.882  |
| DG | 1-Hexadecanol | GABRB1  | 80.882  |
| DG | 1-Hexadecanol | VCAM1   | 80.882  |
| DG | 1-Hexadecanol | SLC29A1 | 80.882  |
| DG | 1-Hexadecanol | GRIA2   | 80.882  |
| DG | 1-Hexadecanol | CHRN2   | 80.882  |
| DG | 1-Hexadecanol | CHRNA6  | 80.882  |
| DG | 1-Hexadecanol | GRIA3   | 80.882  |
| DG | 1-Hexadecanol | HTR3A   | 80.882  |
| DG | 1-Hexadecanol | CHRN4   | 80.882  |
| DG | 1-Hexadecanol | ADAM8   | 55.444  |
| DG | 1-Hexadecanol | KCNMA1  | 55.444  |
| DG | 1-Hexadecanol | SCN3B   | 48      |
| DG | 1-Hexadecanol | AKR1D1  | 48      |
| DG | 1-Hexadecanol | SCN9A   | 48      |
| DG | 1-Hexadecanol | SCN8A   | 48      |
| DG | 1-Hexadecanol | HMGA2   | 22.373  |
| DG | 1-Hexadecanol | P2RX2   | 22.373  |
| DG | 1-Hexadecanol | ANK2    | 22.373  |
| DG | 1-Hexadecanol | MAOB    | 22.373  |

|    |               |         |         |
|----|---------------|---------|---------|
| DG | 1-Hexadecanol | NPY5R   | 22.373  |
| DG | 1-Hexadecanol | DRD2    | 22.373  |
| DG | 1-Hexadecanol | UTS2R   | 22.373  |
| DG | 1-Hexadecanol | KCNE5   | 22.373  |
| DG | 1-Hexadecanol | CRH     | 22.373  |
| DG | 1-Hexadecanol | NCOA1   | 22.373  |
| DG | 1-Hexadecanol | ROCK1   | 22.373  |
| DG | 1-Hexadecanol | KMT2A   | 22.373  |
| DG | 1-Hexadecanol | DRD1    | 22.373  |
| DG | 1-Hexadecanol | KCNQ1   | 22.373  |
| DG | 1-Hexadecanol | GRM7    | 22.373  |
| DG | 1-Hexadecanol | TRPM8   | 122.778 |
| DG | 1-Hexadecanol | CACNG2  | 80.882  |
| DG | 1-Hexadecanol | GRIA1   | 80.882  |
| DG | 1-Hexadecanol | CHRNA7  | 80.882  |
| DG | 1-Hexadecanol | CACNA1S | 80.882  |
| DG | 1-Hexadecanol | GABRA4  | 80.882  |
| DG | 1-Hexadecanol | CACNA1D | 80.882  |
| DG | 1-Hexadecanol | GABRB3  | 80.882  |
| DG | 1-Hexadecanol | GABRA5  | 80.882  |
| DG | 1-Hexadecanol | GABRA1  | 80.882  |
| DG | 1-Hexadecanol | KCNJ9   | 80.882  |
| DG | 1-Hexadecanol | SLC28A3 | 55.444  |
| DG | 1-Hexadecanol | SCN11A  | 48      |
| DG | 1-Hexadecanol | SCN3A   | 48      |
| DG | 1-Hexadecanol | ALDH5A1 | 48      |
| DG | 1-Hexadecanol | SCN4A   | 48      |
| DG | 1-Hexadecanol | SCN1B   | 48      |
| DG | 1-Hexadecanol | CACNA1H | 22.373  |
| DG | 1-Hexadecanol | HTR2A   | 22.373  |
| DG | 1-Hexadecanol | ZP4     | 22.373  |
| DG | 1-Hexadecanol | GLRB    | 22.373  |
| DG | 1-Hexadecanol | MSN     | 22.373  |
| DG | 1-Hexadecanol | AVP     | 22.373  |
| DG | 1-Hexadecanol | ADIRF   | 22.373  |
| DG | 1-Hexadecanol | CNR1    | 22.373  |
| DG | 1-Hexadecanol | GLI3    | 22.373  |
| DG | 1-Hexadecanol | AOC2    | 22.373  |
| DG | 1-Hexadecanol | KCNA5   | 22.373  |
| DG | 1-Hexadecanol | TNR     | 22.373  |
| DG | 1-Hexadecanol | EEA1    | 22.373  |
| DG | 1-Hexadecanol | ICAM1   | 22.373  |
| DG | 1-Hexadecanol | FOS     | 22.373  |
| DG | 1-Hexadecanol | TRPA1   | 122.778 |
| DG | 1-Hexadecanol | GABRD   | 80.882  |
| DG | 1-Hexadecanol | GLRA2   | 80.882  |
| DG | 1-Hexadecanol | KCNJ6   | 80.882  |
| DG | 1-Hexadecanol | GABRG1  | 80.882  |
| DG | 1-Hexadecanol | CHRNA3  | 80.882  |
| DG | 1-Hexadecanol | HTR3D   | 80.882  |
| DG | 1-Hexadecanol | KCNJ5   | 80.882  |

|    |               |          |        |
|----|---------------|----------|--------|
| DG | 1-Hexadecanol | SLC29A2  | 80.882 |
| DG | 1-Hexadecanol | CHRNA9   | 80.882 |
| DG | 1-Hexadecanol | HTR3C    | 80.882 |
| DG | 1-Hexadecanol | ADRA1B   | 55.444 |
| DG | 1-Hexadecanol | SCN2B    | 48     |
| DG | 1-Hexadecanol | SCN7A    | 48     |
| DG | 1-Hexadecanol | SCN2A    | 48     |
| DG | 1-Hexadecanol | SCN4B    | 48     |
| DG | 1-Hexadecanol | OGDH     | 48     |
| DG | 1-Hexadecanol | SLITRK6  | 22.373 |
| DG | 1-Hexadecanol | AVPRIA   | 22.373 |
| DG | 1-Hexadecanol | SUMO1    | 22.373 |
| DG | 1-Hexadecanol | P2RX3    | 22.373 |
| DG | 1-Hexadecanol | GHRL     | 22.373 |
| DG | 1-Hexadecanol | PAX2     | 22.373 |
| DG | 1-Hexadecanol | GHRH     | 22.373 |
| DG | 1-Hexadecanol | SLC18A3  | 22.373 |
| DG | 1-Hexadecanol | CAV3     | 22.373 |
| DG | 1-Hexadecanol | IL6      | 22.373 |
| DG | 1-Hexadecanol | TACR2    | 22.373 |
| DG | 1-Hexadecanol | ZP3      | 22.373 |
| DG | 1-Hexadecanol | POU4F3   | 22.373 |
| DG | 1-Hexadecanol | CARTPT   | 22.373 |
| DG | 1-Hexadecanol | GRIN1    | 22.373 |
| DG | 1-Hexadecanol | CACNB1   | 80.882 |
| DG | 1-Hexadecanol | CHRNA4   | 80.882 |
| DG | 1-Hexadecanol | KCNJ3    | 80.882 |
| DG | 1-Hexadecanol | GABRE    | 80.882 |
| DG | 1-Hexadecanol | GABRP    | 80.882 |
| DG | 1-Hexadecanol | GABRB2   | 80.882 |
| DG | 1-Hexadecanol | GABRQ    | 80.882 |
| DG | 1-Hexadecanol | GRIN3A   | 80.882 |
| DG | 1-Hexadecanol | HTR3E    | 80.882 |
| DG | 1-Hexadecanol | CHRFAM7A | 80.882 |
| DG | 1-Hexadecanol | GLRA1    | 80.882 |
| DG | 1-Hexadecanol | FOXL2    | 55.444 |
| DG | 1-Hexadecanol | ABAT     | 48     |
| DG | 1-Hexadecanol | SCN5A    | 48     |
| DG | 1-Hexadecanol | HDAC9    | 48     |
| DG | 1-Hexadecanol | SRD5A2   | 48     |
| DG | 1-Hexadecanol | HDAC2    | 48     |
| DG | 1-Hexadecanol | UTS2     | 22.373 |
| DG | 1-Hexadecanol | ADORA2A  | 22.373 |
| DG | 1-Hexadecanol | CNR2     | 22.373 |
| DG | 1-Hexadecanol | SLC44A4  | 22.373 |
| DG | 1-Hexadecanol | TBR1     | 22.373 |
| DG | 1-Hexadecanol | AOC1     | 22.373 |
| DG | 1-Hexadecanol | HCRT     | 22.373 |
| DG | 1-Hexadecanol | EZR      | 22.373 |
| DG | 1-Hexadecanol | SLC9A6   | 22.373 |
| DG | 1-Hexadecanol | GLRA4    | 22.373 |

|    |               |         |        |
|----|---------------|---------|--------|
| DG | 1-Hexadecanol | NRP1    | 22.373 |
| DG | 1-Hexadecanol | PLCB1   | 22.373 |
| DG | 1-Hexadecanol | CALCA   | 22.373 |
| DG | 1-Hexadecanol | ATP8B1  | 22.373 |
| DG | 4-Octanone    | SCN11A  | 48     |
| DG | 4-Octanone    | SCN3A   | 48     |
| DG | 4-Octanone    | SCN2A   | 48     |
| DG | 4-Octanone    | ACADSB  | 48     |
| DG | 4-Octanone    | SCN2B   | 48     |
| DG | 4-Octanone    | SCN7A   | 48     |
| DG | 4-Octanone    | HDAC9   | 48     |
| DG | 4-Octanone    | SCN8A   | 48     |
| DG | 4-Octanone    | ABAT    | 48     |
| DG | 4-Octanone    | SCN5A   | 48     |
| DG | 4-Octanone    | SCN9A   | 48     |
| DG | 4-Octanone    | SCN1B   | 48     |
| DG | 4-Octanone    | SCN1A   | 48     |
| DG | 4-Octanone    | SCN10A  | 48     |
| DG | 4-Octanone    | SCN4A   | 48     |
| DG | 4-Octanone    | OGDH    | 48     |
| DG | 4-Octanone    | SCN3B   | 48     |
| DG | 4-Octanone    | ALDH5A1 | 48     |
| DG | 4-Octanone    | SCN4B   | 48     |
| DG | 4-Octanone    | HDAC2   | 48     |
| DG | P-Ethylphenol | GABRA2  | 80.882 |
| DG | P-Ethylphenol | TNF     | 80.882 |
| DG | P-Ethylphenol | GABRP   | 80.882 |
| DG | P-Ethylphenol | GABRQ   | 80.882 |
| DG | P-Ethylphenol | PDE4B   | 80.882 |
| DG | P-Ethylphenol | COLQ    | 55.444 |
| DG | P-Ethylphenol | SLC6A4  | 48     |
| DG | P-Ethylphenol | DRD3    | 48     |
| DG | P-Ethylphenol | SCN1A   | 23     |
| DG | P-Ethylphenol | SLC5A7  | 22.373 |
| DG | P-Ethylphenol | SIRT2   | 22.373 |
| DG | P-Ethylphenol | HCN4    | 22.373 |
| DG | P-Ethylphenol | NCKAP1L | 22.373 |
| DG | P-Ethylphenol | EIF2AK1 | 22.373 |
| DG | P-Ethylphenol | PRSS12  | 22.373 |
| DG | P-Ethylphenol | FGFR2   | 22.373 |
| DG | P-Ethylphenol | IL1RN   | 22.373 |
| DG | P-Ethylphenol | IFNG    | 22.373 |
| DG | P-Ethylphenol | ROCK2   | 22.373 |
| DG | P-Ethylphenol | CAMK2D  | 22.373 |
| DG | P-Ethylphenol | ROCK1   | 22.373 |
| DG | P-Ethylphenol | BMP4    | 22.373 |
| DG | P-Ethylphenol | AGRN    | 22.373 |
| DG | P-Ethylphenol | PDE2A   | 22.373 |
| DG | P-Ethylphenol | GRIN1   | 22.373 |
| DG | P-Ethylphenol | GABRD   | 80.882 |
| DG | P-Ethylphenol | GABRE   | 80.882 |



|    |               |         |        |
|----|---------------|---------|--------|
| DG | P-Ethylphenol | GABRA4  | 80.882 |
| DG | P-Ethylphenol | GABRB3  | 80.882 |
| DG | P-Ethylphenol | BCHE    | 80.882 |
| DG | P-Ethylphenol | LTA     | 55.444 |
| DG | P-Ethylphenol | DRD4    | 48     |
| DG | P-Ethylphenol | ALOX5   | 48     |
| DG | P-Ethylphenol | SCN3A   | 23     |
| DG | P-Ethylphenol | SEMA4D  | 22.373 |
| DG | P-Ethylphenol | MIF     | 22.373 |
| DG | P-Ethylphenol | FASLG   | 22.373 |
| DG | P-Ethylphenol | CRP     | 22.373 |
| DG | P-Ethylphenol | IL1B    | 22.373 |
| DG | P-Ethylphenol | SLC44A4 | 22.373 |
| DG | P-Ethylphenol | ANGPT1  | 22.373 |
| DG | P-Ethylphenol | PLN     | 22.373 |
| DG | P-Ethylphenol | HRC     | 22.373 |
| DG | P-Ethylphenol | ADIRF   | 22.373 |
| DG | P-Ethylphenol | IL10    | 22.373 |
| DG | P-Ethylphenol | FNTA    | 22.373 |
| DG | P-Ethylphenol | AHCY    | 22.373 |
| DG | P-Ethylphenol | IKBKB   | 22.373 |
| DG | P-Ethylphenol | CHDH    | 22.373 |
| DG | P-Ethylphenol | HCN2    | 22.373 |
| DG | P-Ethylphenol | PDE3A   | 80.882 |
| DG | P-Ethylphenol | SCN2A   | 80.882 |
| DG | P-Ethylphenol | GABRB2  | 80.882 |
| DG | P-Ethylphenol | GABRA5  | 80.882 |
| DG | P-Ethylphenol | GABRG2  | 80.882 |
| DG | P-Ethylphenol | RXRA    | 55.444 |
| DG | P-Ethylphenol | HTR7    | 48     |
| DG | P-Ethylphenol | DRD5    | 48     |
| DG | P-Ethylphenol | HMGA2   | 22.373 |
| DG | P-Ethylphenol | NRG1    | 22.373 |
| DG | P-Ethylphenol | DMGDH   | 22.373 |
| DG | P-Ethylphenol | LGALS3  | 22.373 |
| DG | P-Ethylphenol | TLR3    | 22.373 |
| DG | P-Ethylphenol | SHH     | 22.373 |
| DG | P-Ethylphenol | ADORA2B | 22.373 |
| DG | P-Ethylphenol | AURKA   | 22.373 |
| DG | P-Ethylphenol | DNM3    | 22.373 |
| DG | P-Ethylphenol | TGFB2   | 22.373 |
| DG | P-Ethylphenol | BDKRB2  | 22.373 |
| DG | P-Ethylphenol | CDH8    | 22.373 |
| DG | P-Ethylphenol | HPN     | 22.373 |
| DG | P-Ethylphenol | APOA1   | 22.373 |
| DG | P-Ethylphenol | IDO1    | 22.373 |
| DG | P-Ethylphenol | SOX9    | 22.373 |
| DG | P-Ethylphenol | GABRB1  | 80.882 |
| DG | P-Ethylphenol | GABRA3  | 80.882 |
| DG | P-Ethylphenol | ACHE    | 80.882 |
| DG | P-Ethylphenol | GABRA6  | 80.882 |

|    |               |         |        |
|----|---------------|---------|--------|
| DG | P-Ethylphenol | PDE3B   | 55.444 |
| DG | P-Ethylphenol | SLC6A3  | 48     |
| DG | P-Ethylphenol | HTR1A   | 48     |
| DG | P-Ethylphenol | DRD1    | 48     |
| DG | P-Ethylphenol | PDE5A   | 22.373 |
| DG | P-Ethylphenol | CD74    | 22.373 |
| DG | P-Ethylphenol | NKX3-1  | 22.373 |
| DG | P-Ethylphenol | KLF4    | 22.373 |
| DG | P-Ethylphenol | EPO     | 22.373 |
| DG | P-Ethylphenol | RIPK1   | 22.373 |
| DG | P-Ethylphenol | ALDH7A1 | 22.373 |
| DG | P-Ethylphenol | WNT2    | 22.373 |
| DG | P-Ethylphenol | FCER2   | 22.373 |
| DG | P-Ethylphenol | RAPGEF2 | 22.373 |
| DG | P-Ethylphenol | ASCL1   | 22.373 |
| DG | P-Ethylphenol | NCOA1   | 22.373 |
| DG | P-Ethylphenol | KMT2A   | 22.373 |
| DG | P-Ethylphenol | ARHGEF2 | 22.373 |
| DG | P-Ethylphenol | CTNNB1  | 22.373 |
| DG | P-Ethylphenol | CAMK2G  | 22.373 |
| DG | P-Ethylphenol | GABRG3  | 80.882 |
| DG | P-Ethylphenol | GABRG1  | 80.882 |
| DG | P-Ethylphenol | SCN4A   | 80.882 |
| DG | P-Ethylphenol | GABRA1  | 80.882 |
| DG | P-Ethylphenol | PDE4D   | 55.444 |
| DG | P-Ethylphenol | DRD2    | 48     |
| DG | P-Ethylphenol | DBH     | 48     |
| DG | P-Ethylphenol | SLC6A2  | 48     |
| DG | P-Ethylphenol | APOA2   | 22.373 |
| DG | P-Ethylphenol | HPX     | 22.373 |
| DG | P-Ethylphenol | SIX3    | 22.373 |
| DG | P-Ethylphenol | LILRB1  | 22.373 |
| DG | P-Ethylphenol | MAP2K5  | 22.373 |
| DG | P-Ethylphenol | FGF10   | 22.373 |
| DG | P-Ethylphenol | FADD    | 22.373 |
| DG | P-Ethylphenol | YBX3    | 22.373 |
| DG | P-Ethylphenol | WNT2B   | 22.373 |
| DG | P-Ethylphenol | TIRAP   | 22.373 |
| DG | P-Ethylphenol | ENPP6   | 22.373 |
| DG | P-Ethylphenol | IL6     | 22.373 |
| DG | P-Ethylphenol | NOD2    | 22.373 |
| DG | P-Ethylphenol | IL4     | 22.373 |
| DG | P-Ethylphenol | CHKA    | 22.373 |
| DG | P-Ethylphenol | FAS     | 22.373 |
| DG | Campherenol   | VDR     | 80.882 |
| DG | Campherenol   | ESR1    | 48     |
| DG | Campherenol   | GPBAR1  | 22.373 |
| DG | Campherenol   | CALB1   | 22.373 |
| DG | Campherenol   | TCF3    | 22.373 |
| DG | Campherenol   | B4GALT1 | 22.373 |
| DG | Campherenol   | RXRA    | 22.373 |

|    |                    |         |        |
|----|--------------------|---------|--------|
| DG | Campherenol        | CYP27B1 | 80.882 |
| DG | Campherenol        | PGR     | 48     |
| DG | Campherenol        | SNAI2   | 22.373 |
| DG | Campherenol        | FGF23   | 22.373 |
| DG | Campherenol        | BAX     | 22.373 |
| DG | Campherenol        | S100G   | 22.373 |
| DG | Campherenol        | NR1H4   | 22.373 |
| DG | Campherenol        | GC      | 55.444 |
| DG | Campherenol        | NFKB1   | 22.373 |
| DG | Campherenol        | MED1    | 22.373 |
| DG | Campherenol        | GFI1    | 22.373 |
| DG | Campherenol        | KL      | 22.373 |
| DG | Campherenol        | CYP27A1 | 22.373 |
| DG | Campherenol        | TRIM24  | 22.373 |
| DG | Campherenol        | SNW1    | 55.444 |
| DG | Campherenol        | AKR1C3  | 22.373 |
| DG | Campherenol        | SNAI1   | 22.373 |
| DG | Campherenol        | LANCL2  | 22.373 |
| DG | Campherenol        | CYP2R1  | 22.373 |
| DG | Campherenol        | KANK2   | 22.373 |
| DG | Campherenol        | F12     | 48     |
| DG | Campherenol        | CYP24A1 | 22.373 |
| DG | Campherenol        | CYP3A4  | 22.373 |
| DG | Campherenol        | WNT4    | 22.373 |
| DG | Campherenol        | PML     | 22.373 |
| DG | Campherenol        | IRX5    | 22.373 |
| DG | Beta-Caryophyllene | KCND1   | 80.882 |
| DG | Beta-Caryophyllene | GAMT    | 80.882 |
| DG | Beta-Caryophyllene | CAT     | 80.882 |
| DG | Beta-Caryophyllene | KCNC1   | 80.882 |
| DG | Beta-Caryophyllene | KCND2   | 80.882 |
| DG | Beta-Caryophyllene | KCND3   | 80.882 |
| DG | Beta-Caryophyllene | KCNQ1   | 55.444 |
| DG | Beta-Caryophyllene | CYGB    | 22.373 |
| DG | Beta-Caryophyllene | IGF1    | 22.373 |
| DG | Beta-Caryophyllene | EDN1    | 22.373 |
| DG | Beta-Caryophyllene | CNTNAP4 | 22.373 |
| DG | Beta-Caryophyllene | GRIN2A  | 22.373 |
| DG | Beta-Caryophyllene | SPARC   | 22.373 |
| DG | Beta-Caryophyllene | CRLF1   | 22.373 |
| DG | Beta-Caryophyllene | ALDH1B1 | 22.373 |
| DG | Beta-Caryophyllene | DARS    | 22.373 |
| DG | Beta-Caryophyllene | MIP     | 22.373 |
| DG | Beta-Caryophyllene | STX1A   | 22.373 |
| DG | Beta-Caryophyllene | NRXN2   | 22.373 |
| DG | Beta-Caryophyllene | DAB2IP  | 22.373 |
| DG | Beta-Caryophyllene | KCNA3   | 80.882 |
| DG | Beta-Caryophyllene | KCNC3   | 80.882 |
| DG | Beta-Caryophyllene | KCNB1   | 80.882 |
| DG | Beta-Caryophyllene | ADH1C   | 80.882 |
| DG | Beta-Caryophyllene | ALDH2   | 80.882 |

|    |                    |         |        |
|----|--------------------|---------|--------|
| DG | Beta-Caryophyllene | GUCY1B3 | 55.444 |
| DG | Beta-Caryophyllene | FBP1    | 22.373 |
| DG | Beta-Caryophyllene | NRXN3   | 22.373 |
| DG | Beta-Caryophyllene | SHANK3  | 22.373 |
| DG | Beta-Caryophyllene | OXT     | 22.373 |
| DG | Beta-Caryophyllene | RNASE4  | 22.373 |
| DG | Beta-Caryophyllene | SLC17A7 | 22.373 |
| DG | Beta-Caryophyllene | SORCS3  | 22.373 |
| DG | Beta-Caryophyllene | FADD    | 22.373 |
| DG | Beta-Caryophyllene | LEP     | 22.373 |
| DG | Beta-Caryophyllene | ANK3    | 22.373 |
| DG | Beta-Caryophyllene | RYR3    | 22.373 |
| DG | Beta-Caryophyllene | PAXBP1  | 22.373 |
| DG | Beta-Caryophyllene | ADORA1  | 22.373 |
| DG | Beta-Caryophyllene | CYP2E1  | 22.373 |
| DG | Beta-Caryophyllene | PRKAB1  | 80.882 |
| DG | Beta-Caryophyllene | KCNA1   | 80.882 |
| DG | Beta-Caryophyllene | ADH1B   | 80.882 |
| DG | Beta-Caryophyllene | KCNB2   | 80.882 |
| DG | Beta-Caryophyllene | KCNA4   | 80.882 |
| DG | Beta-Caryophyllene | GATM    | 55.444 |
| DG | Beta-Caryophyllene | DGKI    | 22.373 |
| DG | Beta-Caryophyllene | LRRC4B  | 22.373 |
| DG | Beta-Caryophyllene | ACY3    | 22.373 |
| DG | Beta-Caryophyllene | MAGI2   | 22.373 |
| DG | Beta-Caryophyllene | RAB3A   | 22.373 |
| DG | Beta-Caryophyllene | CYP11A1 | 22.373 |
| DG | Beta-Caryophyllene | RNASE8  | 22.373 |
| DG | Beta-Caryophyllene | SNTG2   | 22.373 |
| DG | Beta-Caryophyllene | NLGN1   | 22.373 |
| DG | Beta-Caryophyllene | KCNE5   | 22.373 |
| DG | Beta-Caryophyllene | ZPR1    | 22.373 |
| DG | Beta-Caryophyllene | PAX7    | 22.373 |
| DG | Beta-Caryophyllene | ADH4    | 22.373 |
| DG | Beta-Caryophyllene | ACY1    | 22.373 |
| DG | Beta-Caryophyllene | ADH1A   | 80.882 |
| DG | Beta-Caryophyllene | KCNA2   | 80.882 |
| DG | Beta-Caryophyllene | DLG4    | 80.882 |
| DG | Beta-Caryophyllene | KCNA5   | 80.882 |
| DG | Beta-Caryophyllene | KCNA7   | 80.882 |
| DG | Beta-Caryophyllene | KCNK4   | 55.444 |
| DG | Beta-Caryophyllene | ADH7    | 22.373 |
| DG | Beta-Caryophyllene | AQP8    | 22.373 |
| DG | Beta-Caryophyllene | ASPA    | 22.373 |
| DG | Beta-Caryophyllene | APOE    | 22.373 |
| DG | Beta-Caryophyllene | MC4R    | 22.373 |
| DG | Beta-Caryophyllene | SCN5A   | 22.373 |
| DG | Beta-Caryophyllene | KCNIP2  | 22.373 |
| DG | Beta-Caryophyllene | SCGB1A1 | 22.373 |
| DG | Beta-Caryophyllene | CACNA1D | 22.373 |
| DG | Beta-Caryophyllene | PPARD   | 22.373 |

|    |                    |         |        |
|----|--------------------|---------|--------|
| DG | Beta-Caryophyllene | ALDH3B1 | 22.373 |
| DG | Beta-Caryophyllene | ALDH3B2 | 22.373 |
| DG | Beta-Caryophyllene | GJA5    | 22.373 |
| DG | Beta-Caryophyllene | KCNA10  | 80.882 |
| DG | Beta-Caryophyllene | TPO     | 80.882 |
| DG | Beta-Caryophyllene | KCNC2   | 80.882 |
| DG | Beta-Caryophyllene | RNASE1  | 80.882 |
| DG | Beta-Caryophyllene | KCNA6   | 80.882 |
| DG | Beta-Caryophyllene | IYD     | 55.444 |
| DG | Beta-Caryophyllene | NFIB    | 22.373 |
| DG | Beta-Caryophyllene | ARX     | 22.373 |
| DG | Beta-Caryophyllene | NRXN1   | 22.373 |
| DG | Beta-Caryophyllene | SOX15   | 22.373 |
| DG | Beta-Caryophyllene | IL1B    | 22.373 |
| DG | Beta-Caryophyllene | SCN10A  | 22.373 |
| DG | Beta-Caryophyllene | GPX7    | 22.373 |
| DG | Beta-Caryophyllene | OXTR    | 22.373 |
| DG | Beta-Caryophyllene | RAPGEF2 | 22.373 |
| DG | Beta-Caryophyllene | NKX2-1  | 22.373 |
| DG | Beta-Caryophyllene | NPPA    | 22.373 |
| DG | Beta-Caryophyllene | RNASE2  | 22.373 |
| DG | Beta-Caryophyllene | FAS     | 22.373 |
| DG | 1-Dodecene         | KCND1   | 80.882 |
| DG | 1-Dodecene         | GAMT    | 80.882 |
| DG | 1-Dodecene         | CAT     | 80.882 |
| DG | 1-Dodecene         | KCNC1   | 80.882 |
| DG | 1-Dodecene         | KCND2   | 80.882 |
| DG | 1-Dodecene         | KCND3   | 80.882 |
| DG | 1-Dodecene         | KCNQ1   | 55.444 |
| DG | 1-Dodecene         | CYGB    | 22.373 |
| DG | 1-Dodecene         | IGF1    | 22.373 |
| DG | 1-Dodecene         | EDN1    | 22.373 |
| DG | 1-Dodecene         | CNTNAP4 | 22.373 |
| DG | 1-Dodecene         | GRIN2A  | 22.373 |
| DG | 1-Dodecene         | SPARC   | 22.373 |
| DG | 1-Dodecene         | CRLF1   | 22.373 |
| DG | 1-Dodecene         | ALDH1B1 | 22.373 |
| DG | 1-Dodecene         | DARS    | 22.373 |
| DG | 1-Dodecene         | MIP     | 22.373 |
| DG | 1-Dodecene         | STX1A   | 22.373 |
| DG | 1-Dodecene         | NRXN2   | 22.373 |
| DG | 1-Dodecene         | DAB2IP  | 22.373 |
| DG | 1-Dodecene         | KCNA3   | 80.882 |
| DG | 1-Dodecene         | KCNC3   | 80.882 |
| DG | 1-Dodecene         | KCNB1   | 80.882 |
| DG | 1-Dodecene         | ADH1C   | 80.882 |
| DG | 1-Dodecene         | ALDH2   | 80.882 |
| DG | 1-Dodecene         | GUCY1B3 | 55.444 |
| DG | 1-Dodecene         | FBP1    | 22.373 |
| DG | 1-Dodecene         | NRXN3   | 22.373 |
| DG | 1-Dodecene         | SHANK3  | 22.373 |

|    |            |         |        |
|----|------------|---------|--------|
| DG | 1-Dodecene | OXT     | 22.373 |
| DG | 1-Dodecene | RNASE4  | 22.373 |
| DG | 1-Dodecene | SLC17A7 | 22.373 |
| DG | 1-Dodecene | SORCS3  | 22.373 |
| DG | 1-Dodecene | FADD    | 22.373 |
| DG | 1-Dodecene | LEP     | 22.373 |
| DG | 1-Dodecene | ANK3    | 22.373 |
| DG | 1-Dodecene | RYR3    | 22.373 |
| DG | 1-Dodecene | PAXBPI  | 22.373 |
| DG | 1-Dodecene | ADORA1  | 22.373 |
| DG | 1-Dodecene | CYP2E1  | 22.373 |
| DG | 1-Dodecene | PRKAB1  | 80.882 |
| DG | 1-Dodecene | KCNA1   | 80.882 |
| DG | 1-Dodecene | ADH1B   | 80.882 |
| DG | 1-Dodecene | KCNB2   | 80.882 |
| DG | 1-Dodecene | KCNA4   | 80.882 |
| DG | 1-Dodecene | GATM    | 55.444 |
| DG | 1-Dodecene | DGKI    | 22.373 |
| DG | 1-Dodecene | LRRC4B  | 22.373 |
| DG | 1-Dodecene | ACY3    | 22.373 |
| DG | 1-Dodecene | MAGI2   | 22.373 |
| DG | 1-Dodecene | RAB3A   | 22.373 |
| DG | 1-Dodecene | CYP11A1 | 22.373 |
| DG | 1-Dodecene | RNASE8  | 22.373 |
| DG | 1-Dodecene | SNTG2   | 22.373 |
| DG | 1-Dodecene | NLGN1   | 22.373 |
| DG | 1-Dodecene | KCNE5   | 22.373 |
| DG | 1-Dodecene | ZPR1    | 22.373 |
| DG | 1-Dodecene | PAX7    | 22.373 |
| DG | 1-Dodecene | ADH4    | 22.373 |
| DG | 1-Dodecene | ACY1    | 22.373 |
| DG | 1-Dodecene | ADH1A   | 80.882 |
| DG | 1-Dodecene | KCNA2   | 80.882 |
| DG | 1-Dodecene | DLG4    | 80.882 |
| DG | 1-Dodecene | KCNA5   | 80.882 |
| DG | 1-Dodecene | KCNA7   | 80.882 |
| DG | 1-Dodecene | KCNK4   | 55.444 |
| DG | 1-Dodecene | ADH7    | 22.373 |
| DG | 1-Dodecene | AQP8    | 22.373 |
| DG | 1-Dodecene | ASPA    | 22.373 |
| DG | 1-Dodecene | APOE    | 22.373 |
| DG | 1-Dodecene | MC4R    | 22.373 |
| DG | 1-Dodecene | SCN5A   | 22.373 |
| DG | 1-Dodecene | KCNIP2  | 22.373 |
| DG | 1-Dodecene | SCGB1A1 | 22.373 |
| DG | 1-Dodecene | CACNA1D | 22.373 |
| DG | 1-Dodecene | PPARD   | 22.373 |
| DG | 1-Dodecene | ALDH3B1 | 22.373 |
| DG | 1-Dodecene | ALDH3B2 | 22.373 |
| DG | 1-Dodecene | GJA5    | 22.373 |
| DG | 1-Dodecene | KCNA10  | 80.882 |

|    |            |         |        |
|----|------------|---------|--------|
| DG | 1-Dodecene | TPO     | 80.882 |
| DG | 1-Dodecene | KCNC2   | 80.882 |
| DG | 1-Dodecene | RNASE1  | 80.882 |
| DG | 1-Dodecene | KCNA6   | 80.882 |
| DG | 1-Dodecene | IYD     | 55.444 |
| DG | 1-Dodecene | NFIB    | 22.373 |
| DG | 1-Dodecene | ARX     | 22.373 |
| DG | 1-Dodecene | NRXN1   | 22.373 |
| DG | 1-Dodecene | SOX15   | 22.373 |
| DG | 1-Dodecene | IL1B    | 22.373 |
| DG | 1-Dodecene | SCN10A  | 22.373 |
| DG | 1-Dodecene | GPX7    | 22.373 |
| DG | 1-Dodecene | OXTR    | 22.373 |
| DG | 1-Dodecene | RAPGEF2 | 22.373 |
| DG | 1-Dodecene | NKX2-1  | 22.373 |
| DG | 1-Dodecene | NPPA    | 22.373 |
| DG | 1-Dodecene | RNASE2  | 22.373 |
| DG | 1-Dodecene | FAS     | 22.373 |
| DG | Guaiacol   | TYR     | 80.882 |
| DG | Guaiacol   | PRKCA   | 23     |
| DG | Guaiacol   | DGKA    | 23     |
| DG | Guaiacol   | GPR143  | 22.373 |
| DG | Guaiacol   | DCT     | 55.444 |
| DG | Guaiacol   | NR1I2   | 23     |
| DG | Guaiacol   | PRKCB   | 23     |
| DG | Guaiacol   | TYRP1   | 55.444 |
| DG | Guaiacol   | ALOX5   | 23     |
| DG | Guaiacol   | SEC14L4 | 23     |
| DG | Guaiacol   | SEC14L3 | 23     |
| DG | Guaiacol   | PPP2CB  | 23     |
| DG | Guaiacol   | AP3D1   | 22.373 |
| DG | Guaiacol   | PPP2CA  | 23     |
| DG | Guaiacol   | SEC14L2 | 23     |
| DG | Guaiacol   | OCA2    | 22.373 |
| DG | Isoeugenol | CNR2    | 23     |
| DG | Isoeugenol | TYR     | 23     |
| DG | Isoeugenol | CNR1    | 23     |
| DG | M-Cresol   | GABRA2  | 80.882 |
| DG | M-Cresol   | TNF     | 80.882 |
| DG | M-Cresol   | GABRP   | 80.882 |
| DG | M-Cresol   | GABRQ   | 80.882 |
| DG | M-Cresol   | PDE4B   | 80.882 |
| DG | M-Cresol   | COLQ    | 55.444 |
| DG | M-Cresol   | HMGA2   | 22.373 |
| DG | M-Cresol   | NRG1    | 22.373 |
| DG | M-Cresol   | DMGDH   | 22.373 |
| DG | M-Cresol   | LGALS3  | 22.373 |
| DG | M-Cresol   | TLR3    | 22.373 |
| DG | M-Cresol   | SHH     | 22.373 |
| DG | M-Cresol   | ADORA2B | 22.373 |
| DG | M-Cresol   | AURKA   | 22.373 |

|    |          |         |        |
|----|----------|---------|--------|
| DG | M-Cresol | DNM3    | 22.373 |
| DG | M-Cresol | SLC6A4  | 22.373 |
| DG | M-Cresol | ADIRF   | 22.373 |
| DG | M-Cresol | IL10    | 22.373 |
| DG | M-Cresol | FNTA    | 22.373 |
| DG | M-Cresol | AHCY    | 22.373 |
| DG | M-Cresol | IKBKB   | 22.373 |
| DG | M-Cresol | CHDH    | 22.373 |
| DG | M-Cresol | HCN2    | 22.373 |
| DG | M-Cresol | GABRD   | 80.882 |
| DG | M-Cresol | GABRE   | 80.882 |
| DG | M-Cresol | GABRA4  | 80.882 |
| DG | M-Cresol | GABRB3  | 80.882 |
| DG | M-Cresol | BCHE    | 80.882 |
| DG | M-Cresol | LTA     | 55.444 |
| DG | M-Cresol | PDE5A   | 22.373 |
| DG | M-Cresol | CD74    | 22.373 |
| DG | M-Cresol | NKX3-1  | 22.373 |
| DG | M-Cresol | KLF4    | 22.373 |
| DG | M-Cresol | EPO     | 22.373 |
| DG | M-Cresol | RIPK1   | 22.373 |
| DG | M-Cresol | ALDH7A1 | 22.373 |
| DG | M-Cresol | WNT2    | 22.373 |
| DG | M-Cresol | FCER2   | 22.373 |
| DG | M-Cresol | TGFB2   | 22.373 |
| DG | M-Cresol | BDKRB2  | 22.373 |
| DG | M-Cresol | CDH8    | 22.373 |
| DG | M-Cresol | HPN     | 22.373 |
| DG | M-Cresol | APOA1   | 22.373 |
| DG | M-Cresol | IDO1    | 22.373 |
| DG | M-Cresol | SOX9    | 22.373 |
| DG | M-Cresol | PDE3A   | 80.882 |
| DG | M-Cresol | SCN2A   | 80.882 |
| DG | M-Cresol | GABRB2  | 80.882 |
| DG | M-Cresol | GABRA5  | 80.882 |
| DG | M-Cresol | GABRG2  | 80.882 |
| DG | M-Cresol | RXRA    | 55.444 |
| DG | M-Cresol | APOA2   | 22.373 |
| DG | M-Cresol | HPX     | 22.373 |
| DG | M-Cresol | SIX3    | 22.373 |
| DG | M-Cresol | LILRB1  | 22.373 |
| DG | M-Cresol | MAP2K5  | 22.373 |
| DG | M-Cresol | FGF10   | 22.373 |
| DG | M-Cresol | FADD    | 22.373 |
| DG | M-Cresol | YBX3    | 22.373 |
| DG | M-Cresol | WNT2B   | 22.373 |
| DG | M-Cresol | RAPGEF2 | 22.373 |
| DG | M-Cresol | ASCL1   | 22.373 |
| DG | M-Cresol | NCOA1   | 22.373 |
| DG | M-Cresol | KMT2A   | 22.373 |
| DG | M-Cresol | ARHGEF2 | 22.373 |



|    |            |         |        |
|----|------------|---------|--------|
| DG | M-Cresol   | CTNNB1  | 22.373 |
| DG | M-Cresol   | CAMK2G  | 22.373 |
| DG | M-Cresol   | GABRB1  | 80.882 |
| DG | M-Cresol   | GABRA3  | 80.882 |
| DG | M-Cresol   | ACHE    | 80.882 |
| DG | M-Cresol   | GABRA6  | 80.882 |
| DG | M-Cresol   | PDE3B   | 55.444 |
| DG | M-Cresol   | SCN1A   | 23     |
| DG | M-Cresol   | SLC5A7  | 22.373 |
| DG | M-Cresol   | SIRT2   | 22.373 |
| DG | M-Cresol   | HCN4    | 22.373 |
| DG | M-Cresol   | NCKAP1L | 22.373 |
| DG | M-Cresol   | EIF2AK1 | 22.373 |
| DG | M-Cresol   | PRSS12  | 22.373 |
| DG | M-Cresol   | FGFR2   | 22.373 |
| DG | M-Cresol   | IL1RN   | 22.373 |
| DG | M-Cresol   | IFNG    | 22.373 |
| DG | M-Cresol   | TIRAP   | 22.373 |
| DG | M-Cresol   | ENPP6   | 22.373 |
| DG | M-Cresol   | IL6     | 22.373 |
| DG | M-Cresol   | NOD2    | 22.373 |
| DG | M-Cresol   | IL4     | 22.373 |
| DG | M-Cresol   | CHKA    | 22.373 |
| DG | M-Cresol   | FAS     | 22.373 |
| DG | M-Cresol   | GABRG3  | 80.882 |
| DG | M-Cresol   | GABRG1  | 80.882 |
| DG | M-Cresol   | SCN4A   | 80.882 |
| DG | M-Cresol   | GABRA1  | 80.882 |
| DG | M-Cresol   | PDE4D   | 55.444 |
| DG | M-Cresol   | SCN3A   | 23     |
| DG | M-Cresol   | SEMA4D  | 22.373 |
| DG | M-Cresol   | MIF     | 22.373 |
| DG | M-Cresol   | FASLG   | 22.373 |
| DG | M-Cresol   | CRP     | 22.373 |
| DG | M-Cresol   | IL1B    | 22.373 |
| DG | M-Cresol   | SLC44A4 | 22.373 |
| DG | M-Cresol   | ANGPT1  | 22.373 |
| DG | M-Cresol   | PLN     | 22.373 |
| DG | M-Cresol   | HRC     | 22.373 |
| DG | M-Cresol   | ROCK2   | 22.373 |
| DG | M-Cresol   | CAMK2D  | 22.373 |
| DG | M-Cresol   | ROCK1   | 22.373 |
| DG | M-Cresol   | BMP4    | 22.373 |
| DG | M-Cresol   | AGRN    | 22.373 |
| DG | M-Cresol   | PDE2A   | 22.373 |
| DG | M-Cresol   | GRIN1   | 22.373 |
| DG | Isofermene | KCND1   | 80.882 |
| DG | Isofermene | GAMT    | 80.882 |
| DG | Isofermene | CAT     | 80.882 |
| DG | Isofermene | KCNC1   | 80.882 |
| DG | Isofermene | KCND2   | 80.882 |

|    |            |         |        |
|----|------------|---------|--------|
| DG | Isofermene | KCND3   | 80.882 |
| DG | Isofermene | KCNQ1   | 55.444 |
| DG | Isofermene | RDH13   | 48     |
| DG | Isofermene | ALDH1A3 | 48     |
| DG | Isofermene | ALDH1A1 | 48     |
| DG | Isofermene | ALDH1A2 | 48     |
| DG | Isofermene | NFIB    | 22.373 |
| DG | Isofermene | ARX     | 22.373 |
| DG | Isofermene | NRXN1   | 22.373 |
| DG | Isofermene | SOX15   | 22.373 |
| DG | Isofermene | IL1B    | 22.373 |
| DG | Isofermene | SCN10A  | 22.373 |
| DG | Isofermene | GPX7    | 22.373 |
| DG | Isofermene | OXTR    | 22.373 |
| DG | Isofermene | RAPGEF2 | 22.373 |
| DG | Isofermene | NKX2-1  | 22.373 |
| DG | Isofermene | NPPA    | 22.373 |
| DG | Isofermene | RNASE2  | 22.373 |
| DG | Isofermene | FAS     | 22.373 |
| DG | Isofermene | KCNA3   | 80.882 |
| DG | Isofermene | KCNC3   | 80.882 |
| DG | Isofermene | KCNB1   | 80.882 |
| DG | Isofermene | ADH1C   | 80.882 |
| DG | Isofermene | ALDH2   | 80.882 |
| DG | Isofermene | GUCY1B3 | 55.444 |
| DG | Isofermene | RDH11   | 48     |
| DG | Isofermene | DHRS3   | 48     |
| DG | Isofermene | RDH12   | 48     |
| DG | Isofermene | RLBP1   | 48     |
| DG | Isofermene | NR3C2   | 48     |
| DG | Isofermene | CYGB    | 22.373 |
| DG | Isofermene | IGF1    | 22.373 |
| DG | Isofermene | EDN1    | 22.373 |
| DG | Isofermene | CNTNAP4 | 22.373 |
| DG | Isofermene | GRIN2A  | 22.373 |
| DG | Isofermene | SPARC   | 22.373 |
| DG | Isofermene | CRLF1   | 22.373 |
| DG | Isofermene | ALDH1B1 | 22.373 |
| DG | Isofermene | DARS    | 22.373 |
| DG | Isofermene | MIP     | 22.373 |
| DG | Isofermene | STX1A   | 22.373 |
| DG | Isofermene | NRXN2   | 22.373 |
| DG | Isofermene | DAB2IP  | 22.373 |
| DG | Isofermene | PRKAB1  | 80.882 |
| DG | Isofermene | KCNA1   | 80.882 |
| DG | Isofermene | ADH1B   | 80.882 |
| DG | Isofermene | KCNB2   | 80.882 |
| DG | Isofermene | KCNA4   | 80.882 |
| DG | Isofermene | GATM    | 55.444 |
| DG | Isofermene | RBP3    | 48     |
| DG | Isofermene | RDH5    | 48     |

|    |            |         |        |
|----|------------|---------|--------|
| DG | Isofermene | OPRK1   | 48     |
| DG | Isofermene | RDH14   | 48     |
| DG | Isofermene | FBP1    | 22.373 |
| DG | Isofermene | NRXN3   | 22.373 |
| DG | Isofermene | SHANK3  | 22.373 |
| DG | Isofermene | OXT     | 22.373 |
| DG | Isofermene | RNASE4  | 22.373 |
| DG | Isofermene | SLC17A7 | 22.373 |
| DG | Isofermene | SORCS3  | 22.373 |
| DG | Isofermene | FADD    | 22.373 |
| DG | Isofermene | LEP     | 22.373 |
| DG | Isofermene | ANK3    | 22.373 |
| DG | Isofermene | RYR3    | 22.373 |
| DG | Isofermene | PAXBP1  | 22.373 |
| DG | Isofermene | ADORA1  | 22.373 |
| DG | Isofermene | CYP2E1  | 22.373 |
| DG | Isofermene | ADH1A   | 80.882 |
| DG | Isofermene | KCNA2   | 80.882 |
| DG | Isofermene | DLG4    | 80.882 |
| DG | Isofermene | KCNA5   | 80.882 |
| DG | Isofermene | KCNA7   | 80.882 |
| DG | Isofermene | KCNK4   | 55.444 |
| DG | Isofermene | RETSAT  | 48     |
| DG | Isofermene | ESR1    | 48     |
| DG | Isofermene | DHRS4   | 48     |
| DG | Isofermene | RDH8    | 48     |
| DG | Isofermene | DGKI    | 22.373 |
| DG | Isofermene | LRRC4B  | 22.373 |
| DG | Isofermene | ACY3    | 22.373 |
| DG | Isofermene | MAGI2   | 22.373 |
| DG | Isofermene | RAB3A   | 22.373 |
| DG | Isofermene | CYP11A1 | 22.373 |
| DG | Isofermene | RNASE8  | 22.373 |
| DG | Isofermene | SNTG2   | 22.373 |
| DG | Isofermene | NLGN1   | 22.373 |
| DG | Isofermene | KCNE5   | 22.373 |
| DG | Isofermene | ZPR1    | 22.373 |
| DG | Isofermene | PAX7    | 22.373 |
| DG | Isofermene | ADH4    | 22.373 |
| DG | Isofermene | ACY1    | 22.373 |
| DG | Isofermene | KCNA10  | 80.882 |
| DG | Isofermene | TPO     | 80.882 |
| DG | Isofermene | KCNC2   | 80.882 |
| DG | Isofermene | RNASE1  | 80.882 |
| DG | Isofermene | KCNA6   | 80.882 |
| DG | Isofermene | IYD     | 55.444 |
| DG | Isofermene | CYP17A1 | 48     |
| DG | Isofermene | PGR     | 48     |
| DG | Isofermene | RBP1    | 48     |
| DG | Isofermene | LRAT    | 48     |
| DG | Isofermene | ADH7    | 22.373 |

|    |               |          |        |
|----|---------------|----------|--------|
| DG | Isofermene    | AQP8     | 22.373 |
| DG | Isofermene    | ASPA     | 22.373 |
| DG | Isofermene    | APOE     | 22.373 |
| DG | Isofermene    | MC4R     | 22.373 |
| DG | Isofermene    | SCN5A    | 22.373 |
| DG | Isofermene    | KCNIP2   | 22.373 |
| DG | Isofermene    | SCGB1A1  | 22.373 |
| DG | Isofermene    | CACNA1D  | 22.373 |
| DG | Isofermene    | PPARD    | 22.373 |
| DG | Isofermene    | ALDH3B1  | 22.373 |
| DG | Isofermene    | ALDH3B2  | 22.373 |
| DG | Isofermene    | GJA5     | 22.373 |
| DG | Hexanoic Acid | CHRM1    | 48     |
| DG | Hexanoic Acid | CHRM2    | 48     |
| DG | Crinamine     | CHRNG    | 48     |
| DG | Crinamine     | CHRNA10  | 48     |
| DG | Crinamine     | CHRNA2   | 48     |
| DG | Crinamine     | CHRFAM7A | 48     |
| DG | Crinamine     | CHRNA4   | 48     |
| DG | Crinamine     | CHRNA3   | 48     |
| DG | Crinamine     | CHRNA6   | 48     |
| DG | Crinamine     | CHRNA5   | 48     |
| DG | Crinamine     | CHRN3    | 48     |
| DG | Crinamine     | CHRN2    | 48     |
| DG | Crinamine     | CHRN1    | 48     |
| DG | Crinamine     | CHRN4    | 48     |
| DG | Crinamine     | CHRNA7   | 48     |
| DG | Crinamine     | ACHE     | 48     |
| DG | Crinamine     | BCHE     | 48     |
| DG | Crinamine     | CHRN1    | 48     |
| DG | Crinamine     | CHRNA1   | 48     |
| DG | Crinamine     | CHRNE    | 48     |
| DG | Crinamine     | CHRNA9   | 48     |
| DG | 6-Undecanone  | SCN11A   | 48     |
| DG | 6-Undecanone  | SCN3A    | 48     |
| DG | 6-Undecanone  | ALDH5A1  | 48     |
| DG | 6-Undecanone  | SCN4A    | 48     |
| DG | 6-Undecanone  | SCN1B    | 48     |
| DG | 6-Undecanone  | SCN2B    | 48     |
| DG | 6-Undecanone  | SCN7A    | 48     |
| DG | 6-Undecanone  | SCN2A    | 48     |
| DG | 6-Undecanone  | SCN4B    | 48     |
| DG | 6-Undecanone  | OGDH     | 48     |
| DG | 6-Undecanone  | ABAT     | 48     |
| DG | 6-Undecanone  | SCN5A    | 48     |
| DG | 6-Undecanone  | HDAC9    | 48     |
| DG | 6-Undecanone  | SRD5A2   | 48     |
| DG | 6-Undecanone  | HDAC2    | 48     |
| DG | 6-Undecanone  | SCN1A    | 48     |
| DG | 6-Undecanone  | SCN10A   | 48     |
| DG | 6-Undecanone  | TYR      | 48     |

|    |                  |         |        |
|----|------------------|---------|--------|
| DG | 6-Undecanone     | ACADSB  | 48     |
| DG | 6-Undecanone     | SCN3B   | 48     |
| DG | 6-Undecanone     | AKR1D1  | 48     |
| DG | 6-Undecanone     | SCN9A   | 48     |
| DG | 6-Undecanone     | SCN8A   | 48     |
| DG | Alpha-Chamigrene | KCND1   | 80.882 |
| DG | Alpha-Chamigrene | GAMT    | 80.882 |
| DG | Alpha-Chamigrene | CAT     | 80.882 |
| DG | Alpha-Chamigrene | KCNC1   | 80.882 |
| DG | Alpha-Chamigrene | KCND2   | 80.882 |
| DG | Alpha-Chamigrene | KCND3   | 80.882 |
| DG | Alpha-Chamigrene | KCNQ1   | 55.444 |
| DG | Alpha-Chamigrene | RDH13   | 48     |
| DG | Alpha-Chamigrene | ALDH1A3 | 48     |
| DG | Alpha-Chamigrene | ALDH1A1 | 48     |
| DG | Alpha-Chamigrene | ALDH1A2 | 48     |
| DG | Alpha-Chamigrene | NFIB    | 22.373 |
| DG | Alpha-Chamigrene | ARX     | 22.373 |
| DG | Alpha-Chamigrene | NRXN1   | 22.373 |
| DG | Alpha-Chamigrene | SOX15   | 22.373 |
| DG | Alpha-Chamigrene | IL1B    | 22.373 |
| DG | Alpha-Chamigrene | SCN10A  | 22.373 |
| DG | Alpha-Chamigrene | GPX7    | 22.373 |
| DG | Alpha-Chamigrene | OXTR    | 22.373 |
| DG | Alpha-Chamigrene | RAPGEF2 | 22.373 |
| DG | Alpha-Chamigrene | NKX2-1  | 22.373 |
| DG | Alpha-Chamigrene | NPPA    | 22.373 |
| DG | Alpha-Chamigrene | RNASE2  | 22.373 |
| DG | Alpha-Chamigrene | FAS     | 22.373 |
| DG | Alpha-Chamigrene | KCNA3   | 80.882 |
| DG | Alpha-Chamigrene | KCNC3   | 80.882 |
| DG | Alpha-Chamigrene | KCNB1   | 80.882 |
| DG | Alpha-Chamigrene | ADH1C   | 80.882 |
| DG | Alpha-Chamigrene | ALDH2   | 80.882 |
| DG | Alpha-Chamigrene | GUCY1B3 | 55.444 |
| DG | Alpha-Chamigrene | RDH11   | 48     |
| DG | Alpha-Chamigrene | DHRS3   | 48     |
| DG | Alpha-Chamigrene | RDH12   | 48     |
| DG | Alpha-Chamigrene | RLBP1   | 48     |
| DG | Alpha-Chamigrene | NR3C2   | 48     |
| DG | Alpha-Chamigrene | CYGB    | 22.373 |
| DG | Alpha-Chamigrene | IGF1    | 22.373 |
| DG | Alpha-Chamigrene | EDN1    | 22.373 |
| DG | Alpha-Chamigrene | CNTNAP4 | 22.373 |
| DG | Alpha-Chamigrene | GRIN2A  | 22.373 |
| DG | Alpha-Chamigrene | SPARC   | 22.373 |
| DG | Alpha-Chamigrene | CRLF1   | 22.373 |
| DG | Alpha-Chamigrene | ALDH1B1 | 22.373 |
| DG | Alpha-Chamigrene | DARS    | 22.373 |
| DG | Alpha-Chamigrene | MIP     | 22.373 |
| DG | Alpha-Chamigrene | STX1A   | 22.373 |

|    |                  |         |        |
|----|------------------|---------|--------|
| DG | Alpha-Chamigrene | NRXN2   | 22.373 |
| DG | Alpha-Chamigrene | DAB2IP  | 22.373 |
| DG | Alpha-Chamigrene | PRKAB1  | 80.882 |
| DG | Alpha-Chamigrene | KCNA1   | 80.882 |
| DG | Alpha-Chamigrene | ADH1B   | 80.882 |
| DG | Alpha-Chamigrene | KCNB2   | 80.882 |
| DG | Alpha-Chamigrene | KCNA4   | 80.882 |
| DG | Alpha-Chamigrene | GATM    | 55.444 |
| DG | Alpha-Chamigrene | RBP3    | 48     |
| DG | Alpha-Chamigrene | RDH5    | 48     |
| DG | Alpha-Chamigrene | OPRK1   | 48     |
| DG | Alpha-Chamigrene | RDH14   | 48     |
| DG | Alpha-Chamigrene | FBP1    | 22.373 |
| DG | Alpha-Chamigrene | NRXN3   | 22.373 |
| DG | Alpha-Chamigrene | SHANK3  | 22.373 |
| DG | Alpha-Chamigrene | OXT     | 22.373 |
| DG | Alpha-Chamigrene | RNASE4  | 22.373 |
| DG | Alpha-Chamigrene | SLC17A7 | 22.373 |
| DG | Alpha-Chamigrene | SORCS3  | 22.373 |
| DG | Alpha-Chamigrene | FADD    | 22.373 |
| DG | Alpha-Chamigrene | LEP     | 22.373 |
| DG | Alpha-Chamigrene | ANK3    | 22.373 |
| DG | Alpha-Chamigrene | RYR3    | 22.373 |
| DG | Alpha-Chamigrene | PAXBP1  | 22.373 |
| DG | Alpha-Chamigrene | ADORA1  | 22.373 |
| DG | Alpha-Chamigrene | CYP2E1  | 22.373 |
| DG | Alpha-Chamigrene | ADH1A   | 80.882 |
| DG | Alpha-Chamigrene | KCNA2   | 80.882 |
| DG | Alpha-Chamigrene | DLG4    | 80.882 |
| DG | Alpha-Chamigrene | KCNA5   | 80.882 |
| DG | Alpha-Chamigrene | KCNA7   | 80.882 |
| DG | Alpha-Chamigrene | KCNK4   | 55.444 |
| DG | Alpha-Chamigrene | RETSAT  | 48     |
| DG | Alpha-Chamigrene | ESR1    | 48     |
| DG | Alpha-Chamigrene | DHRS4   | 48     |
| DG | Alpha-Chamigrene | RDH8    | 48     |
| DG | Alpha-Chamigrene | DGKI    | 22.373 |
| DG | Alpha-Chamigrene | LRRC4B  | 22.373 |
| DG | Alpha-Chamigrene | ACY3    | 22.373 |
| DG | Alpha-Chamigrene | MAGI2   | 22.373 |
| DG | Alpha-Chamigrene | RAB3A   | 22.373 |
| DG | Alpha-Chamigrene | CYP11A1 | 22.373 |
| DG | Alpha-Chamigrene | RNASE8  | 22.373 |
| DG | Alpha-Chamigrene | SNTG2   | 22.373 |
| DG | Alpha-Chamigrene | NLGN1   | 22.373 |
| DG | Alpha-Chamigrene | KCNE5   | 22.373 |
| DG | Alpha-Chamigrene | ZPR1    | 22.373 |
| DG | Alpha-Chamigrene | PAX7    | 22.373 |
| DG | Alpha-Chamigrene | ADH4    | 22.373 |
| DG | Alpha-Chamigrene | ACY1    | 22.373 |
| DG | Alpha-Chamigrene | KCNA10  | 80.882 |

|    |                  |         |        |
|----|------------------|---------|--------|
| DG | Alpha-Chamigrene | TPO     | 80.882 |
| DG | Alpha-Chamigrene | KCNC2   | 80.882 |
| DG | Alpha-Chamigrene | RNASE1  | 80.882 |
| DG | Alpha-Chamigrene | KCNA6   | 80.882 |
| DG | Alpha-Chamigrene | IYD     | 55.444 |
| DG | Alpha-Chamigrene | CYP17A1 | 48     |
| DG | Alpha-Chamigrene | PGR     | 48     |
| DG | Alpha-Chamigrene | RBP1    | 48     |
| DG | Alpha-Chamigrene | LRAT    | 48     |
| DG | Alpha-Chamigrene | ADH7    | 22.373 |
| DG | Alpha-Chamigrene | AQP8    | 22.373 |
| DG | Alpha-Chamigrene | ASPA    | 22.373 |
| DG | Alpha-Chamigrene | APOE    | 22.373 |
| DG | Alpha-Chamigrene | MC4R    | 22.373 |
| DG | Alpha-Chamigrene | SCN5A   | 22.373 |
| DG | Alpha-Chamigrene | KCNIP2  | 22.373 |
| DG | Alpha-Chamigrene | SCGB1A1 | 22.373 |
| DG | Alpha-Chamigrene | CACNA1D | 22.373 |
| DG | Alpha-Chamigrene | PPARD   | 22.373 |
| DG | Alpha-Chamigrene | ALDH3B1 | 22.373 |
| DG | Alpha-Chamigrene | ALDH3B2 | 22.373 |
| DG | Alpha-Chamigrene | GJA5    | 22.373 |
| DG | 3-Carene         | KCND1   | 80.882 |
| DG | 3-Carene         | GAMT    | 80.882 |
| DG | 3-Carene         | CAT     | 80.882 |
| DG | 3-Carene         | KCNC1   | 80.882 |
| DG | 3-Carene         | KCND2   | 80.882 |
| DG | 3-Carene         | KCND3   | 80.882 |
| DG | 3-Carene         | KCNQ1   | 55.444 |
| DG | 3-Carene         | ADH7    | 22.373 |
| DG | 3-Carene         | AQP8    | 22.373 |
| DG | 3-Carene         | ASPA    | 22.373 |
| DG | 3-Carene         | APOE    | 22.373 |
| DG | 3-Carene         | MC4R    | 22.373 |
| DG | 3-Carene         | SCN5A   | 22.373 |
| DG | 3-Carene         | KCNIP2  | 22.373 |
| DG | 3-Carene         | SCGB1A1 | 22.373 |
| DG | 3-Carene         | CACNA1D | 22.373 |
| DG | 3-Carene         | PPARD   | 22.373 |
| DG | 3-Carene         | ALDH3B1 | 22.373 |
| DG | 3-Carene         | ALDH3B2 | 22.373 |
| DG | 3-Carene         | GJA5    | 22.373 |
| DG | 3-Carene         | KCNA3   | 80.882 |
| DG | 3-Carene         | KCNC3   | 80.882 |
| DG | 3-Carene         | KCNB1   | 80.882 |
| DG | 3-Carene         | ADH1C   | 80.882 |
| DG | 3-Carene         | ALDH2   | 80.882 |
| DG | 3-Carene         | GUCY1B3 | 55.444 |
| DG | 3-Carene         | ESR1    | 48     |
| DG | 3-Carene         | NFIB    | 22.373 |
| DG | 3-Carene         | ARX     | 22.373 |

|    |          |         |        |
|----|----------|---------|--------|
| DG | 3-Carene | NRXN1   | 22.373 |
| DG | 3-Carene | SOX15   | 22.373 |
| DG | 3-Carene | IL1B    | 22.373 |
| DG | 3-Carene | SCN10A  | 22.373 |
| DG | 3-Carene | GPX7    | 22.373 |
| DG | 3-Carene | OXTR    | 22.373 |
| DG | 3-Carene | RAPGEF2 | 22.373 |
| DG | 3-Carene | NKX2-1  | 22.373 |
| DG | 3-Carene | NPPA    | 22.373 |
| DG | 3-Carene | RNASE2  | 22.373 |
| DG | 3-Carene | FAS     | 22.373 |
| DG | 3-Carene | PRKAB1  | 80.882 |
| DG | 3-Carene | KCNA1   | 80.882 |
| DG | 3-Carene | ADH1B   | 80.882 |
| DG | 3-Carene | KCNB2   | 80.882 |
| DG | 3-Carene | KCNA4   | 80.882 |
| DG | 3-Carene | GATM    | 55.444 |
| DG | 3-Carene | PGR     | 48     |
| DG | 3-Carene | CYGB    | 22.373 |
| DG | 3-Carene | IGF1    | 22.373 |
| DG | 3-Carene | EDN1    | 22.373 |
| DG | 3-Carene | CNTNAP4 | 22.373 |
| DG | 3-Carene | GRIN2A  | 22.373 |
| DG | 3-Carene | SPARC   | 22.373 |
| DG | 3-Carene | CRLF1   | 22.373 |
| DG | 3-Carene | ALDH1B1 | 22.373 |
| DG | 3-Carene | DARS    | 22.373 |
| DG | 3-Carene | MIP     | 22.373 |
| DG | 3-Carene | STX1A   | 22.373 |
| DG | 3-Carene | NRXN2   | 22.373 |
| DG | 3-Carene | DAB2IP  | 22.373 |
| DG | 3-Carene | ADH1A   | 80.882 |
| DG | 3-Carene | KCNA2   | 80.882 |
| DG | 3-Carene | DLG4    | 80.882 |
| DG | 3-Carene | KCNA5   | 80.882 |
| DG | 3-Carene | KCNA7   | 80.882 |
| DG | 3-Carene | KCNK4   | 55.444 |
| DG | 3-Carene | FBP1    | 22.373 |
| DG | 3-Carene | NRXN3   | 22.373 |
| DG | 3-Carene | SHANK3  | 22.373 |
| DG | 3-Carene | OXT     | 22.373 |
| DG | 3-Carene | RNASE4  | 22.373 |
| DG | 3-Carene | SLC17A7 | 22.373 |
| DG | 3-Carene | SORCS3  | 22.373 |
| DG | 3-Carene | FADD    | 22.373 |
| DG | 3-Carene | LEP     | 22.373 |
| DG | 3-Carene | ANK3    | 22.373 |
| DG | 3-Carene | RYR3    | 22.373 |
| DG | 3-Carene | PAXBP1  | 22.373 |
| DG | 3-Carene | ADORA1  | 22.373 |
| DG | 3-Carene | CYP2E1  | 22.373 |



|    |                  |          |        |
|----|------------------|----------|--------|
| DG | 3-Carene         | KCNA10   | 80.882 |
| DG | 3-Carene         | TPO      | 80.882 |
| DG | 3-Carene         | KCNC2    | 80.882 |
| DG | 3-Carene         | RNASE1   | 80.882 |
| DG | 3-Carene         | KCNA6    | 80.882 |
| DG | 3-Carene         | IYD      | 55.444 |
| DG | 3-Carene         | DGKI     | 22.373 |
| DG | 3-Carene         | LRRC4B   | 22.373 |
| DG | 3-Carene         | ACY3     | 22.373 |
| DG | 3-Carene         | MAGI2    | 22.373 |
| DG | 3-Carene         | RAB3A    | 22.373 |
| DG | 3-Carene         | CYP11A1  | 22.373 |
| DG | 3-Carene         | RNASE8   | 22.373 |
| DG | 3-Carene         | SNTG2    | 22.373 |
| DG | 3-Carene         | NLGN1    | 22.373 |
| DG | 3-Carene         | KCNE5    | 22.373 |
| DG | 3-Carene         | ZPR1     | 22.373 |
| DG | 3-Carene         | PAX7     | 22.373 |
| DG | 3-Carene         | ADH4     | 22.373 |
| DG | 3-Carene         | ACY1     | 22.373 |
| HQ | Astragaloside Vi | CXCR4    | 48     |
| HQ | Choline          | PLD1     | 686    |
| HQ | Choline          | PLD2     | 686    |
| HQ | Choline          | NRG1     | 22.373 |
| HQ | Choline          | NAPEPLD  | 22.373 |
| HQ | Choline          | ALDH7A1  | 22.373 |
| HQ | Choline          | ENPP6    | 22.373 |
| HQ | Choline          | AGRN     | 22.373 |
| HQ | Choline          | PCYT1A   | 686    |
| HQ | Choline          | BCHE     | 686    |
| HQ | Choline          | DMGDH    | 22.373 |
| HQ | Choline          | FSCN1    | 22.373 |
| HQ | Choline          | DNM3     | 22.373 |
| HQ | Choline          | CDH8     | 22.373 |
| HQ | Choline          | CHKA     | 22.373 |
| HQ | Choline          | PCYT1B   | 686    |
| HQ | Choline          | COLQ     | 55.444 |
| HQ | Choline          | SIX3     | 22.373 |
| HQ | Choline          | PRSS12   | 22.373 |
| HQ | Choline          | PLD4     | 22.373 |
| HQ | Choline          | PLD3     | 22.373 |
| HQ | Choline          | CHDH     | 22.373 |
| HQ | Choline          | PHOSPHO1 | 686    |
| HQ | Choline          | SLC5A7   | 22.373 |
| HQ | Choline          | RAP1GAP  | 22.373 |
| HQ | Choline          | KLF5     | 22.373 |
| HQ | Choline          | ASCL1    | 22.373 |
| HQ | Choline          | PODXL    | 22.373 |
| HQ | Choline          | ATP8B1   | 22.373 |
| HQ | Choline          | ACHE     | 686    |
| HQ | Choline          | HMOX1    | 22.373 |

|    |                  |         |         |
|----|------------------|---------|---------|
| HQ | Choline          | CRP     | 22.373  |
| HQ | Choline          | SLC44A4 | 22.373  |
| HQ | Choline          | GPLD1   | 22.373  |
| HQ | Choline          | FNTA    | 22.373  |
| HQ | Choline          | GRIN1   | 22.373  |
| HQ | Uridine          | TYMS    | 122.778 |
| HQ | Uridine          | POLA1   | 48      |
| HQ | Uridine          | GCDH    | 23      |
| HQ | Uridine          | POR     | 23      |
| HQ | Uridine          | TXNRD1  | 23      |
| HQ | Uridine          | AIFM1   | 23      |
| HQ | Uridine          | DNMT1   | 23      |
| HQ | Uridine          | AK5     | 22.373  |
| HQ | Uridine          | AK9     | 22.373  |
| HQ | Uridine          | NT5C2   | 80.882  |
| HQ | Uridine          | PNP     | 48      |
| HQ | Uridine          | ERO1B   | 23      |
| HQ | Uridine          | CYB5R1  | 23      |
| HQ | Uridine          | ACADS   | 23      |
| HQ | Uridine          | ACOX1   | 23      |
| HQ | Uridine          | ACAD8   | 23      |
| HQ | Uridine          | GUK1    | 22.373  |
| HQ | Uridine          | NUDT12  | 22.373  |
| HQ | Uridine          | ADK     | 80.882  |
| HQ | Uridine          | POLB    | 48      |
| HQ | Uridine          | IVD     | 23      |
| HQ | Uridine          | MAOB    | 23      |
| HQ | Uridine          | CYB5R3  | 23      |
| HQ | Uridine          | ACADM   | 23      |
| HQ | Uridine          | NOS1    | 23      |
| HQ | Uridine          | ANKH    | 22.373  |
| HQ | Uridine          | IMPDH2  | 22.373  |
| HQ | Uridine          | IMPDH1  | 80.882  |
| HQ | Uridine          | TERT    | 48      |
| HQ | Uridine          | NQO2    | 23      |
| HQ | Uridine          | FDXR    | 23      |
| HQ | Uridine          | MAOA    | 23      |
| HQ | Uridine          | NQO1    | 23      |
| HQ | Uridine          | DLD     | 23      |
| HQ | Uridine          | ENPP3   | 22.373  |
| HQ | Uridine          | ENPP1   | 80.882  |
| HQ | Uridine          | GSR     | 23      |
| HQ | Uridine          | DPYD    | 23      |
| HQ | Uridine          | DAO     | 23      |
| HQ | Uridine          | IL4I1   | 23      |
| HQ | Uridine          | XDH     | 23      |
| HQ | Uridine          | GFER    | 23      |
| HQ | Uridine          | APRT    | 22.373  |
| HQ | Astragaloside Ii | SLC47A1 | 48      |
| HQ | Astragaloside Ii | MLNR    | 48      |
| HQ | Astragaloside Ii | CYP3A4  | 48      |

|    |                        |         |         |
|----|------------------------|---------|---------|
| HQ | Astragaloside li       | SLCO1B3 | 48      |
| HQ | Astragaloside li       | CYP51A1 | 48      |
| HQ | Astragaloside li       | ALB     | 48      |
| HQ | Astragaloside li       | KCNH2   | 48      |
| HQ | Astragaloside li       | ABCB1   | 48      |
| HQ | Astragaloside li       | ATP1A1  | 48      |
| HQ | Astragaloside li       | SLCO1B1 | 48      |
| HQ | Chrysanthemaxanthin    | ADA     | 23      |
| HQ | Chrysanthemaxanthin    | ITFG2   | 22.373  |
| HQ | Chrysanthemaxanthin    | DGUOK   | 22.373  |
| HQ | Chrysanthemaxanthin    | XDH     | 22.373  |
| HQ | Chrysanthemaxanthin    | ADORA1  | 22.373  |
| HQ | Soyasaponin 1          | NR3C1   | 48      |
| HQ | Soyasaponin 1          | ATP1A1  | 48      |
| HQ | Lupeol                 | VDR     | 80.882  |
| HQ | Lupeol                 | ESR1    | 48      |
| HQ | Lupeol                 | NFKB1   | 22.373  |
| HQ | Lupeol                 | MED1    | 22.373  |
| HQ | Lupeol                 | GFI1    | 22.373  |
| HQ | Lupeol                 | KL      | 22.373  |
| HQ | Lupeol                 | CYP27A1 | 22.373  |
| HQ | Lupeol                 | TRIM24  | 22.373  |
| HQ | Lupeol                 | CYP27B1 | 80.882  |
| HQ | Lupeol                 | PGR     | 48      |
| HQ | Lupeol                 | AKR1C3  | 22.373  |
| HQ | Lupeol                 | SNAI1   | 22.373  |
| HQ | Lupeol                 | LANCL2  | 22.373  |
| HQ | Lupeol                 | CYP2R1  | 22.373  |
| HQ | Lupeol                 | KANK2   | 22.373  |
| HQ | Lupeol                 | GC      | 55.444  |
| HQ | Lupeol                 | OPRK1   | 48      |
| HQ | Lupeol                 | CYP24A1 | 22.373  |
| HQ | Lupeol                 | CYP3A4  | 22.373  |
| HQ | Lupeol                 | WNT4    | 22.373  |
| HQ | Lupeol                 | PML     | 22.373  |
| HQ | Lupeol                 | IRX5    | 22.373  |
| HQ | Lupeol                 | SNW1    | 55.444  |
| HQ | Lupeol                 | TRPM8   | 48      |
| HQ | Lupeol                 | GPBAR1  | 22.373  |
| HQ | Lupeol                 | CALB1   | 22.373  |
| HQ | Lupeol                 | TCF3    | 22.373  |
| HQ | Lupeol                 | B4GALT1 | 22.373  |
| HQ | Lupeol                 | RXRA    | 22.373  |
| HQ | Lupeol                 | TRPV3   | 48      |
| HQ | Lupeol                 | TRPA1   | 48      |
| HQ | Lupeol                 | SNAI2   | 22.373  |
| HQ | Lupeol                 | FGF23   | 22.373  |
| HQ | Lupeol                 | BAX     | 22.373  |
| HQ | Lupeol                 | S100G   | 22.373  |
| HQ | Lupeol                 | NR1H4   | 22.373  |
| HQ | 20-Hexadecanoylengenol | PRKCA   | 122.778 |

|    |                        |         |         |
|----|------------------------|---------|---------|
| HQ | 20-Hexadecanoylingenol | CD300A  | 22.373  |
| HQ | 20-Hexadecanoylingenol | PRKCD   | 122.778 |
| HQ | 20-Hexadecanoylingenol | CHGA    | 22.373  |
| HQ | 20-Hexadecanoylingenol | PTGER4  | 23      |
| HQ | 20-Hexadecanoylingenol | APOC2   | 22.373  |
| HQ | 20-Hexadecanoylingenol | PTGER2  | 23      |
| HQ | 20-Hexadecanoylingenol | KIF14   | 22.373  |
| HQ | 20-Hexadecanoylingenol | PTGER3  | 23      |
| HQ | 20-Hexadecanoylingenol | PRKCB   | 22.373  |
| HQ | Guanosine              | POLA1   | 122.778 |
| HQ | Guanosine              | ADORA2B | 48      |
| HQ | Guanosine              | MMAB    | 23      |
| HQ | Guanosine              | MMACHC  | 23      |
| HQ | Guanosine              | BRCA1   | 22.373  |
| HQ | Guanosine              | USP7    | 22.373  |
| HQ | Guanosine              | TACR2   | 22.373  |
| HQ | Guanosine              | MGMT    | 22.373  |
| HQ | Guanosine              | ADORA2A | 80.882  |
| HQ | Guanosine              | ADORA3  | 48      |
| HQ | Guanosine              | MTRR    | 23      |
| HQ | Guanosine              | MMAA    | 23      |
| HQ | Guanosine              | PRKDC   | 22.373  |
| HQ | Guanosine              | TCF3    | 22.373  |
| HQ | Guanosine              | UHRF2   | 22.373  |
| HQ | Guanosine              | HELLS   | 22.373  |
| HQ | Guanosine              | POLB    | 80.882  |
| HQ | Guanosine              | ADORA1  | 48      |
| HQ | Guanosine              | MTR     | 23      |
| HQ | Guanosine              | UHRF1   | 22.373  |
| HQ | Guanosine              | KDM1A   | 22.373  |
| HQ | Guanosine              | POLD1   | 22.373  |
| HQ | Guanosine              | DNMT3B  | 22.373  |
| HQ | Guanosine              | DNMT1   | 80.882  |
| HQ | Guanosine              | TCN1    | 23      |
| HQ | Guanosine              | CUBN    | 23      |
| HQ | Guanosine              | DNMT3A  | 22.373  |
| HQ | Guanosine              | POLG    | 22.373  |
| HQ | Guanosine              | PAX5    | 22.373  |
| HQ | Guanosine              | CTCF    | 22.373  |
| HQ | Guanosine              | PNP     | 48      |
| HQ | Guanosine              | MUT     | 23      |
| HQ | Guanosine              | AMN     | 23      |
| HQ | Guanosine              | POLE    | 22.373  |
| HQ | Guanosine              | LIG4    | 22.373  |
| HQ | Guanosine              | TRDMT1  | 22.373  |
| HQ | Guanosine              | KDM3A   | 22.373  |
| HQ | Astramembrannin I      | CXCR4   | 48      |
| HQ | Beta-Sitosterol        | ESR1    | 122.778 |
| HQ | Beta-Sitosterol        | SNW1    | 55.444  |
| HQ | Beta-Sitosterol        | CYP24A1 | 22.373  |
| HQ | Beta-Sitosterol        | CYP3A4  | 22.373  |

|    |                 |          |         |
|----|-----------------|----------|---------|
| HQ | Beta-Sitosterol | WNT4     | 22.373  |
| HQ | Beta-Sitosterol | PML      | 22.373  |
| HQ | Beta-Sitosterol | IRX5     | 22.373  |
| HQ | Beta-Sitosterol | PGR      | 122.778 |
| HQ | Beta-Sitosterol | AR       | 48      |
| HQ | Beta-Sitosterol | GPBAR1   | 22.373  |
| HQ | Beta-Sitosterol | CALB1    | 22.373  |
| HQ | Beta-Sitosterol | TCF3     | 22.373  |
| HQ | Beta-Sitosterol | B4GALT1  | 22.373  |
| HQ | Beta-Sitosterol | RXRA     | 22.373  |
| HQ | Beta-Sitosterol | VDR      | 80.882  |
| HQ | Beta-Sitosterol | NR3C1    | 48      |
| HQ | Beta-Sitosterol | SNAI2    | 22.373  |
| HQ | Beta-Sitosterol | FGF23    | 22.373  |
| HQ | Beta-Sitosterol | BAX      | 22.373  |
| HQ | Beta-Sitosterol | S100G    | 22.373  |
| HQ | Beta-Sitosterol | NR1H4    | 22.373  |
| HQ | Beta-Sitosterol | CYP27B1  | 80.882  |
| HQ | Beta-Sitosterol | NFKB1    | 22.373  |
| HQ | Beta-Sitosterol | MED1     | 22.373  |
| HQ | Beta-Sitosterol | GFI1     | 22.373  |
| HQ | Beta-Sitosterol | KL       | 22.373  |
| HQ | Beta-Sitosterol | CYP27A1  | 22.373  |
| HQ | Beta-Sitosterol | TRIM24   | 22.373  |
| HQ | Beta-Sitosterol | GC       | 55.444  |
| HQ | Beta-Sitosterol | AKR1C3   | 22.373  |
| HQ | Beta-Sitosterol | SNAI1    | 22.373  |
| HQ | Beta-Sitosterol | LANCL2   | 22.373  |
| HQ | Beta-Sitosterol | CYP2R1   | 22.373  |
| HQ | Beta-Sitosterol | KANK2    | 22.373  |
| HQ | Betaine         | PPAT     | 183     |
| HQ | Betaine         | GLUL     | 183     |
| HQ | Betaine         | ADSSL1   | 122.778 |
| HQ | Betaine         | SLC25A12 | 122.778 |
| HQ | Betaine         | ADSS     | 122.778 |
| HQ | Betaine         | PAICS    | 122.778 |
| HQ | Betaine         | TARS2    | 48      |
| HQ | Betaine         | TH       | 36.688  |
| HQ | Betaine         | NOS3     | 36.688  |
| HQ | Betaine         | NPY2R    | 183     |
| HQ | Betaine         | GOT2     | 122.778 |
| HQ | Betaine         | ASNS     | 122.778 |
| HQ | Betaine         | DARS     | 122.778 |
| HQ | Betaine         | CAD      | 122.778 |
| HQ | Betaine         | BCAT1    | 48      |
| HQ | Betaine         | PCCB     | 48      |
| HQ | Betaine         | LIPT1    | 36.688  |
| HQ | Betaine         | CTPS1    | 183     |
| HQ | Betaine         | SLC1A1   | 122.778 |
| HQ | Betaine         | DARS2    | 122.778 |
| HQ | Betaine         | ASRGL1   | 122.778 |

|    |                   |          |         |
|----|-------------------|----------|---------|
| HQ | Betaine           | ACY1     | 122.778 |
| HQ | Betaine           | VAR5     | 48      |
| HQ | Betaine           | SLC5A6   | 36.688  |
| HQ | Betaine           | HPD      | 36.688  |
| HQ | Betaine           | CPS1     | 183     |
| HQ | Betaine           | ACY3     | 122.778 |
| HQ | Betaine           | GOT1     | 122.778 |
| HQ | Betaine           | RNASE1   | 122.778 |
| HQ | Betaine           | SLC25A13 | 122.778 |
| HQ | Betaine           | TARS     | 48      |
| HQ | Betaine           | UGCG     | 36.688  |
| HQ | Betaine           | TPH1     | 36.688  |
| HQ | Betaine           | SST      | 183     |
| HQ | Betaine           | ASPA     | 122.778 |
| HQ | Betaine           | ASPH     | 122.778 |
| HQ | Betaine           | ASS1     | 122.778 |
| HQ | Betaine           | LYZ      | 122.778 |
| HQ | Betaine           | THNSL1   | 48      |
| HQ | Betaine           | LIAS     | 36.688  |
| HQ | Betaine           | PAH      | 36.688  |
| HQ | Soyasapogenol B   | ESR1     | 122.778 |
| HQ | Soyasapogenol B   | PGR      | 122.778 |
| HQ | Soyasapogenol B   | AR       | 48      |
| HQ | Soyasapogenol B   | NR3C1    | 48      |
| HQ | Soyasapogenol B   | ANXA1    | 48      |
| HQ | Kaempferol        | HSD17B1  | 26.373  |
| HQ | Kaempferol        | CRYZ     | 23      |
| HQ | Kaempferol        | VKORC1   | 23      |
| HQ | Kaempferol        | NQO1     | 23      |
| HQ | Quercetin         | HTR2A    | 26.373  |
| HQ | Quercetin         | HTR1D    | 26.373  |
| HQ | Quercetin         | CALY     | 26.373  |
| HQ | Quercetin         | HTR2B    | 26.373  |
| HQ | Quercetin         | DRD2     | 26.373  |
| HQ | Quercetin         | DRD3     | 26.373  |
| HQ | Quercetin         | ADRA2A   | 26.373  |
| HQ | Quercetin         | DRD4     | 26.373  |
| HQ | Quercetin         | DRD5     | 26.373  |
| HQ | Quercetin         | HTR1B    | 26.373  |
| HQ | Quercetin         | HTR1A    | 26.373  |
| HQ | Quercetin         | DRD1     | 26.373  |
| HQ | Quercetin         | HTR2C    | 26.373  |
| HQ | Quercetin         | ADRA2C   | 26.373  |
| HQ | Quercetin         | ADRA2B   | 26.373  |
| HQ | Astragaloside V   | CXCR4    | 48      |
| HQ | Astragaloside Iii | CXCR4    | 48      |
| HQ | Gamma-Sitosterol  | ESR1     | 122.778 |
| HQ | Gamma-Sitosterol  | SNW1     | 55.444  |
| HQ | Gamma-Sitosterol  | CYP24A1  | 22.373  |
| HQ | Gamma-Sitosterol  | CYP3A4   | 22.373  |
| HQ | Gamma-Sitosterol  | WNT4     | 22.373  |

|    |                       |          |         |
|----|-----------------------|----------|---------|
| HQ | Gamma-Sitosterol      | PML      | 22.373  |
| HQ | Gamma-Sitosterol      | IRX5     | 22.373  |
| HQ | Gamma-Sitosterol      | PGR      | 122.778 |
| HQ | Gamma-Sitosterol      | AR       | 48      |
| HQ | Gamma-Sitosterol      | GPBAR1   | 22.373  |
| HQ | Gamma-Sitosterol      | CALB1    | 22.373  |
| HQ | Gamma-Sitosterol      | TCF3     | 22.373  |
| HQ | Gamma-Sitosterol      | B4GALT1  | 22.373  |
| HQ | Gamma-Sitosterol      | RXRA     | 22.373  |
| HQ | Gamma-Sitosterol      | VDR      | 80.882  |
| HQ | Gamma-Sitosterol      | NR3C1    | 48      |
| HQ | Gamma-Sitosterol      | SNAI2    | 22.373  |
| HQ | Gamma-Sitosterol      | FGF23    | 22.373  |
| HQ | Gamma-Sitosterol      | BAX      | 22.373  |
| HQ | Gamma-Sitosterol      | S100G    | 22.373  |
| HQ | Gamma-Sitosterol      | NR1H4    | 22.373  |
| HQ | Gamma-Sitosterol      | CYP27B1  | 80.882  |
| HQ | Gamma-Sitosterol      | NFKB1    | 22.373  |
| HQ | Gamma-Sitosterol      | MED1     | 22.373  |
| HQ | Gamma-Sitosterol      | GFI1     | 22.373  |
| HQ | Gamma-Sitosterol      | KL       | 22.373  |
| HQ | Gamma-Sitosterol      | CYP27A1  | 22.373  |
| HQ | Gamma-Sitosterol      | TRIM24   | 22.373  |
| HQ | Gamma-Sitosterol      | GC       | 55.444  |
| HQ | Gamma-Sitosterol      | AKR1C3   | 22.373  |
| HQ | Gamma-Sitosterol      | SNAI1    | 22.373  |
| HQ | Gamma-Sitosterol      | LANCL2   | 22.373  |
| HQ | Gamma-Sitosterol      | CYP2R1   | 22.373  |
| HQ | Gamma-Sitosterol      | KANK2    | 22.373  |
| HQ | Astragaloside I       | SLC47A1  | 48      |
| HQ | Astragaloside I       | MLNR     | 48      |
| HQ | Astragaloside I       | CYP3A4   | 48      |
| HQ | Astragaloside I       | SLCO1B3  | 48      |
| HQ | Astragaloside I       | CYP51A1  | 48      |
| HQ | Astragaloside I       | ALB      | 48      |
| HQ | Astragaloside I       | KCNH2    | 48      |
| HQ | Astragaloside I       | ABCB1    | 48      |
| HQ | Astragaloside I       | ATP1A1   | 48      |
| HQ | Astragaloside I       | SLCO1B1  | 48      |
| HQ | 3,5-Dimethoxystilbene | PDE4A    | 80.882  |
| HQ | 3,5-Dimethoxystilbene | DHFR     | 80.882  |
| HQ | 3,5-Dimethoxystilbene | PDE3B    | 55.444  |
| HQ | 3,5-Dimethoxystilbene | PDE5A    | 22.373  |
| HQ | 3,5-Dimethoxystilbene | INSR     | 22.373  |
| HQ | 3,5-Dimethoxystilbene | DPYD     | 22.373  |
| HQ | 3,5-Dimethoxystilbene | ADK      | 22.373  |
| HQ | 3,5-Dimethoxystilbene | GAS6     | 22.373  |
| HQ | 3,5-Dimethoxystilbene | HSP90AB1 | 22.373  |
| HQ | 3,5-Dimethoxystilbene | ATIC     | 22.373  |
| HQ | 3,5-Dimethoxystilbene | RAB8B    | 22.373  |
| HQ | 3,5-Dimethoxystilbene | PARP10   | 22.373  |

|    |                       |          |         |
|----|-----------------------|----------|---------|
| HQ | 3,5-Dimethoxystilbene | HCN2     | 22.373  |
| HQ | 3,5-Dimethoxystilbene | PDE3A    | 80.882  |
| HQ | 3,5-Dimethoxystilbene | PDE10A   | 80.882  |
| HQ | 3,5-Dimethoxystilbene | DMTN     | 55.444  |
| HQ | 3,5-Dimethoxystilbene | PDE9A    | 22.373  |
| HQ | 3,5-Dimethoxystilbene | P2RX2    | 22.373  |
| HQ | 3,5-Dimethoxystilbene | HOXA5    | 22.373  |
| HQ | 3,5-Dimethoxystilbene | IL1B     | 22.373  |
| HQ | 3,5-Dimethoxystilbene | CMPK2    | 22.373  |
| HQ | 3,5-Dimethoxystilbene | CHRN2    | 22.373  |
| HQ | 3,5-Dimethoxystilbene | AK9      | 22.373  |
| HQ | 3,5-Dimethoxystilbene | HYAL2    | 22.373  |
| HQ | 3,5-Dimethoxystilbene | CHRN4    | 22.373  |
| HQ | 3,5-Dimethoxystilbene | CACNA1C  | 80.882  |
| HQ | 3,5-Dimethoxystilbene | PDE2A    | 80.882  |
| HQ | 3,5-Dimethoxystilbene | KCNMA1   | 55.444  |
| HQ | 3,5-Dimethoxystilbene | TBPL1    | 22.373  |
| HQ | 3,5-Dimethoxystilbene | HTR2A    | 22.373  |
| HQ | 3,5-Dimethoxystilbene | FBLN1    | 22.373  |
| HQ | 3,5-Dimethoxystilbene | NT5M     | 22.373  |
| HQ | 3,5-Dimethoxystilbene | PDE1B    | 22.373  |
| HQ | 3,5-Dimethoxystilbene | SLC6A4   | 22.373  |
| HQ | 3,5-Dimethoxystilbene | CDKN1A   | 22.373  |
| HQ | 3,5-Dimethoxystilbene | DNMT3B   | 22.373  |
| HQ | 3,5-Dimethoxystilbene | MGMT     | 22.373  |
| HQ | 3,5-Dimethoxystilbene | TRDMT1   | 80.882  |
| HQ | 3,5-Dimethoxystilbene | TYMS     | 80.882  |
| HQ | 3,5-Dimethoxystilbene | ABCC2    | 22.373  |
| HQ | 3,5-Dimethoxystilbene | DNMT3A   | 22.373  |
| HQ | 3,5-Dimethoxystilbene | SIRT2    | 22.373  |
| HQ | 3,5-Dimethoxystilbene | SLC22A6  | 22.373  |
| HQ | 3,5-Dimethoxystilbene | P2RX3    | 22.373  |
| HQ | 3,5-Dimethoxystilbene | DPYS     | 22.373  |
| HQ | 3,5-Dimethoxystilbene | DUT      | 22.373  |
| HQ | 3,5-Dimethoxystilbene | HIF1A    | 22.373  |
| HQ | 3,5-Dimethoxystilbene | HSP90AA1 | 22.373  |
| HQ | 3,5-Dimethoxystilbene | DTYMK    | 22.373  |
| HQ | 3,5-Dimethoxystilbene | DHFRL1   | 80.882  |
| HQ | 3,5-Dimethoxystilbene | SHMT1    | 55.444  |
| HQ | 3,5-Dimethoxystilbene | FOLR2    | 22.373  |
| HQ | 3,5-Dimethoxystilbene | STUB1    | 22.373  |
| HQ | 3,5-Dimethoxystilbene | HCN4     | 22.373  |
| HQ | 3,5-Dimethoxystilbene | ASNS     | 22.373  |
| HQ | 3,5-Dimethoxystilbene | AURKA    | 22.373  |
| HQ | 3,5-Dimethoxystilbene | CHRNA3   | 22.373  |
| HQ | 3,5-Dimethoxystilbene | RAPGEF2  | 22.373  |
| HQ | 3,5-Dimethoxystilbene | FOLR1    | 22.373  |
| HQ | 3,5-Dimethoxystilbene | DNMT1    | 22.373  |
| HQ | 3,5-Dimethoxystilbene | PDE11A   | 22.373  |
| HQ | Adenine               | ADORA2A  | 122.778 |
| HQ | Adenine               | PRKAB1   | 48      |



|    |            |         |         |
|----|------------|---------|---------|
| HQ | Adenine    | ADCY1   | 48      |
| HQ | Adenine    | ADK     | 48      |
| HQ | Adenine    | RRM2    | 48      |
| HQ | Adenine    | PIM1    | 48      |
| HQ | Adenine    | AMD1    | 48      |
| HQ | Adenine    | RRM1    | 48      |
| HQ | Adenine    | ADORA2B | 122.778 |
| HQ | Adenine    | ACSS2   | 48      |
| HQ | Adenine    | COMT    | 48      |
| HQ | Adenine    | GNMT    | 48      |
| HQ | Adenine    | PRKAA1  | 48      |
| HQ | Adenine    | PYGL    | 48      |
| HQ | Adenine    | ACSL1   | 48      |
| HQ | Adenine    | MTAP    | 22.373  |
| HQ | Adenine    | ADORA3  | 122.778 |
| HQ | Adenine    | POLE    | 48      |
| HQ | Adenine    | POLA1   | 48      |
| HQ | Adenine    | PNP     | 48      |
| HQ | Adenine    | MAT1A   | 48      |
| HQ | Adenine    | POLE2   | 48      |
| HQ | Adenine    | PDE4B   | 48      |
| HQ | Adenine    | PRPS1   | 22.373  |
| HQ | Adenine    | ADORA1  | 122.778 |
| HQ | Adenine    | CBS     | 48      |
| HQ | Adenine    | DCK     | 48      |
| HQ | Adenine    | PDE4D   | 48      |
| HQ | Adenine    | CREB1   | 48      |
| HQ | Adenine    | HINT1   | 48      |
| HQ | Adenine    | PRKAB2  | 48      |
| HQ | Adenine    | FBP1    | 48      |
| HQ | Adenine    | POLE3   | 48      |
| HQ | Adenine    | RRM2B   | 48      |
| HQ | Adenine    | CBSL    | 48      |
| HQ | Adenine    | ACSS1   | 48      |
| HQ | Adenine    | MAT2A   | 48      |
| HQ | Adenine    | POLE4   | 48      |
| HQ | Sucrose    | CXCR4   | 48      |
| HQ | Sucrose    | NFKB2   | 48      |
| HQ | Sucrose    | TNF     | 48      |
| HQ | Sucrose    | MMP9    | 48      |
| HQ | Sucrose    | IFNG    | 48      |
| HQ | Canavanine | AZIN2   | 80.882  |
| HQ | Canavanine | SLC7A1  | 80.882  |
| HQ | Canavanine | OAZ3    | 55.444  |
| HQ | Canavanine | AZIN1   | 55.444  |
| HQ | Canavanine | BAAT    | 23      |
| HQ | Canavanine | GCSH    | 23      |
| HQ | Canavanine | IARS2   | 23      |
| HQ | Canavanine | SLC38A3 | 23      |
| HQ | Canavanine | ADSSL1  | 23      |
| HQ | Canavanine | DARS2   | 23      |

|    |            |         |        |
|----|------------|---------|--------|
| HQ | Canavanine | GNMT    | 23     |
| HQ | Canavanine | GPR18   | 23     |
| HQ | Canavanine | GATM    | 23     |
| HQ | Canavanine | GRIN2C  | 23     |
| HQ | Canavanine | PIPOX   | 23     |
| HQ | Canavanine | SHMT2   | 23     |
| HQ | Canavanine | GLYATL2 | 23     |
| HQ | Canavanine | LARS2   | 23     |
| HQ | Canavanine | SLC6A5  | 23     |
| HQ | Canavanine | IARS    | 23     |
| HQ | Canavanine | GLRA1   | 23     |
| HQ | Canavanine | DGAT2   | 22.373 |
| HQ | Canavanine | EDN1    | 22.373 |
| HQ | Canavanine | MTRR    | 22.373 |
| HQ | Canavanine | POR     | 22.373 |
| HQ | Canavanine | BCL2L11 | 22.373 |
| HQ | Canavanine | F2RL1   | 22.373 |
| HQ | Canavanine | SLC3A1  | 22.373 |
| HQ | Canavanine | CPS1    | 22.373 |
| HQ | Canavanine | NAGS    | 22.373 |
| HQ | Canavanine | ASL     | 80.882 |
| HQ | Canavanine | SLC7A4  | 80.882 |
| HQ | Canavanine | AGMAT   | 55.444 |
| HQ | Canavanine | OTC     | 55.444 |
| HQ | Canavanine | SHMT1   | 23     |
| HQ | Canavanine | SLC7A8  | 23     |
| HQ | Canavanine | GLRA2   | 23     |
| HQ | Canavanine | VAR5    | 23     |
| HQ | Canavanine | VDAC3   | 23     |
| HQ | Canavanine | GRIN3B  | 23     |
| HQ | Canavanine | GLRB    | 23     |
| HQ | Canavanine | CTPS1   | 23     |
| HQ | Canavanine | LARS    | 23     |
| HQ | Canavanine | OAT     | 23     |
| HQ | Canavanine | SLC25A2 | 23     |
| HQ | Canavanine | ALAS2   | 23     |
| HQ | Canavanine | SLC32A1 | 23     |
| HQ | Canavanine | RNASE1  | 23     |
| HQ | Canavanine | CAD     | 23     |
| HQ | Canavanine | BCAT2   | 23     |
| HQ | Canavanine | LYZ     | 23     |
| HQ | Canavanine | CYBA    | 22.373 |
| HQ | Canavanine | SLC24A2 | 22.373 |
| HQ | Canavanine | TH      | 22.373 |
| HQ | Canavanine | PQLC2   | 22.373 |
| HQ | Canavanine | ECE1    | 22.373 |
| HQ | Canavanine | DDC     | 22.373 |
| HQ | Canavanine | SLC11A2 | 22.373 |
| HQ | Canavanine | BAD     | 22.373 |
| HQ | Canavanine | CERS1   | 22.373 |
| HQ | Canavanine | NOS2    | 80.882 |

|    |            |          |        |
|----|------------|----------|--------|
| HQ | Canavanine | NOS3     | 80.882 |
| HQ | Canavanine | KLF4     | 55.444 |
| HQ | Canavanine | SLC1A5   | 23     |
| HQ | Canavanine | ABAT     | 23     |
| HQ | Canavanine | PPAT     | 23     |
| HQ | Canavanine | ALAS1    | 23     |
| HQ | Canavanine | NFS1     | 23     |
| HQ | Canavanine | GSS      | 23     |
| HQ | Canavanine | LCMT1    | 23     |
| HQ | Canavanine | GLYAT    | 23     |
| HQ | Canavanine | SLC25A12 | 23     |
| HQ | Canavanine | NARS2    | 23     |
| HQ | Canavanine | GLDC     | 23     |
| HQ | Canavanine | GARS     | 23     |
| HQ | Canavanine | VDAC1    | 23     |
| HQ | Canavanine | OAZ1     | 23     |
| HQ | Canavanine | ADSS     | 23     |
| HQ | Canavanine | PCCB     | 23     |
| HQ | Canavanine | ACY1     | 23     |
| HQ | Canavanine | LCMT2    | 23     |
| HQ | Canavanine | RARS     | 22.373 |
| HQ | Canavanine | PRLR     | 22.373 |
| HQ | Canavanine | EDN3     | 22.373 |
| HQ | Canavanine | HMBS     | 22.373 |
| HQ | Canavanine | FCER2    | 22.373 |
| HQ | Canavanine | PAM      | 22.373 |
| HQ | Canavanine | MT3      | 22.373 |
| HQ | Canavanine | LCN2     | 22.373 |
| HQ | Canavanine | NOS1     | 22.373 |
| HQ | Canavanine | SLC7A3   | 80.882 |
| HQ | Canavanine | ARG2     | 80.882 |
| HQ | Canavanine | GNRH1    | 55.444 |
| HQ | Canavanine | GOT2     | 23     |
| HQ | Canavanine | SLC1A1   | 23     |
| HQ | Canavanine | ACY3     | 23     |
| HQ | Canavanine | BCAT1    | 23     |
| HQ | Canavanine | SLC25A15 | 23     |
| HQ | Canavanine | ASNS     | 23     |
| HQ | Canavanine | GRIN2A   | 23     |
| HQ | Canavanine | AARS2    | 23     |
| HQ | Canavanine | PHYKPL   | 23     |
| HQ | Canavanine | TNNC1    | 23     |
| HQ | Canavanine | VDAC2    | 23     |
| HQ | Canavanine | GPT      | 23     |
| HQ | Canavanine | SLC6A9   | 23     |
| HQ | Canavanine | KARS     | 23     |
| HQ | Canavanine | SLC36A1  | 23     |
| HQ | Canavanine | GLUL     | 23     |
| HQ | Canavanine | KYNU     | 23     |
| HQ | Canavanine | PAICS    | 23     |
| HQ | Canavanine | P2RX2    | 22.373 |

|    |                   |          |        |
|----|-------------------|----------|--------|
| HQ | Canavanine        | HTR2B    | 22.373 |
| HQ | Canavanine        | IL1B     | 22.373 |
| HQ | Canavanine        | TPH1     | 22.373 |
| HQ | Canavanine        | NDOR1    | 22.373 |
| HQ | Canavanine        | SLC11A1  | 22.373 |
| HQ | Canavanine        | SLC7A7   | 22.373 |
| HQ | Canavanine        | ODC1     | 22.373 |
| HQ | Canavanine        | EDN2     | 22.373 |
| HQ | Canavanine        | ASS1     | 80.882 |
| HQ | Canavanine        | HMOX1    | 55.444 |
| HQ | Canavanine        | ARG1     | 55.444 |
| HQ | Canavanine        | GPT2     | 23     |
| HQ | Canavanine        | SLC7A2   | 23     |
| HQ | Canavanine        | ASPA     | 23     |
| HQ | Canavanine        | GCAT     | 23     |
| HQ | Canavanine        | SLC1A4   | 23     |
| HQ | Canavanine        | GLRA3    | 23     |
| HQ | Canavanine        | GOT1     | 23     |
| HQ | Canavanine        | ASPH     | 23     |
| HQ | Canavanine        | GLYATL1  | 23     |
| HQ | Canavanine        | DARS     | 23     |
| HQ | Canavanine        | OAZ2     | 23     |
| HQ | Canavanine        | AARS     | 23     |
| HQ | Canavanine        | ASRGL1   | 23     |
| HQ | Canavanine        | AGXT     | 23     |
| HQ | Canavanine        | ACADSB   | 23     |
| HQ | Canavanine        | AGXT2    | 23     |
| HQ | Canavanine        | SLC25A13 | 23     |
| HQ | Canavanine        | NARS     | 23     |
| HQ | Canavanine        | TPH2     | 22.373 |
| HQ | Canavanine        | PAOX     | 22.373 |
| HQ | Canavanine        | BAK1     | 22.373 |
| HQ | Canavanine        | TAF7     | 22.373 |
| HQ | Canavanine        | IFNG     | 22.373 |
| HQ | Canavanine        | AIF1     | 22.373 |
| HQ | Canavanine        | UROS     | 22.373 |
| HQ | Canavanine        | ADSL     | 22.373 |
| HQ | Astragaloside Vii | CXCR4    | 48     |

Table S2. 252 active ingredients and 469 targets were obtained in the TCMIP database

| <b>Herb</b> | <b>Chemical Component</b> | <b>Candidate Target genes</b> | <b>score</b> |
|-------------|---------------------------|-------------------------------|--------------|
| DH          | Kaempferol                | ACTB                          | 0.9643       |
| DH          | Kaempferol                | AHR                           | 0.9643       |
| DH          | Kaempferol                | AKR1C1                        | 0.8621       |
| DH          | Kaempferol                | AKT1                          | 0.963        |
| DH          | Kaempferol                | ATP5A1                        | 0.9643       |
| DH          | Kaempferol                | ATP5B                         | 0.9643       |
| DH          | Kaempferol                | ATP5C1                        | 0.9643       |
| DH          | Kaempferol                | CA1                           | 0.8065       |
| DH          | Kaempferol                | CA12                          | 0.8065       |
| DH          | Kaempferol                | CA14                          | 0.8065       |
| DH          | Kaempferol                | CA2                           | 0.8065       |
| DH          | Kaempferol                | CA3                           | 0.8065       |
| DH          | Kaempferol                | CA4                           | 0.8065       |
| DH          | Kaempferol                | CA5A                          | 0.8065       |
| DH          | Kaempferol                | CA5B                          | 0.8065       |
| DH          | Kaempferol                | CA6                           | 0.8065       |
| DH          | Kaempferol                | CA7                           | 0.8065       |
| DH          | Kaempferol                | CA9                           | 0.8065       |
| DH          | Kaempferol                | CBR1                          | 0.9643       |
| DH          | Kaempferol                | CDK6                          | 0.9286       |
| DH          | Kaempferol                | CEBPB                         | 0.9643       |
| DH          | Kaempferol                | COMT                          | 0.8966       |
| DH          | Kaempferol                | CSNK2A1                       | 0.9643       |
| DH          | Kaempferol                | CSNK2B                        | 0.9643       |
| DH          | Kaempferol                | CYP19A1                       | 0.8621       |
| DH          | Kaempferol                | CYP1B1                        | 0.9643       |
| DH          | Kaempferol                | DHFRL1                        | 0.8438       |
| DH          | Kaempferol                | DNMT1                         | 0.8438       |
| DH          | Kaempferol                | EIF3F                         | 0.9643       |
| DH          | Kaempferol                | ESR1                          | 0.9643       |
| DH          | Kaempferol                | ESR2                          | 0.9643       |
| DH          | Kaempferol                | ESRRA                         | 0.963        |
| DH          | Kaempferol                | ESRRB                         | 0.963        |
| DH          | Kaempferol                | GABRA1                        | 0.871        |
| DH          | Kaempferol                | GABRA2                        | 0.871        |
| DH          | Kaempferol                | GABRA3                        | 0.871        |
| DH          | Kaempferol                | GABRA4                        | 0.871        |
| DH          | Kaempferol                | GABRA5                        | 0.871        |
| DH          | Kaempferol                | GABRA6                        | 0.871        |
| DH          | Kaempferol                | GABRG1                        | 0.871        |
| DH          | Kaempferol                | GABRG2                        | 0.871        |
| DH          | Kaempferol                | GABRG3                        | 0.871        |
| DH          | Kaempferol                | GPB1                          | 0.963        |
| DH          | Kaempferol                | HCK                           | 0.9643       |
| DH          | Kaempferol                | HIBCH                         | 0.9643       |
| DH          | Kaempferol                | HSP90AA1                      | 0.9643       |
| DH          | Kaempferol                | HSPA2                         | 0.9643       |
| DH          | Kaempferol                | IGHG1                         | 0.8929       |
| DH          | Kaempferol                | JAK1                          | 0.9643       |
| DH          | Kaempferol                | KANSL3                        | 0.8621       |
| DH          | Kaempferol                | MTTP                          | 0.8438       |
| DH          | Kaempferol                | NCOA1                         | 0.963        |

|    |             |         |        |
|----|-------------|---------|--------|
| DH | Kaempferol  | NCOA2   | 0.963  |
| DH | Kaempferol  | NQO2    | 0.9643 |
| DH | Kaempferol  | NR1I2   | 0.9643 |
| DH | Kaempferol  | PIK3CG  | 0.9643 |
| DH | Kaempferol  | PIM1    | 0.9643 |
| DH | Kaempferol  | PRKACA  | 0.8065 |
| DH | Kaempferol  | PRKCA   | 0.8065 |
| DH | Kaempferol  | PRKCB   | 0.8065 |
| DH | Kaempferol  | PTK2B   | 0.963  |
| DH | Kaempferol  | RUVBL2  | 0.9643 |
| DH | Kaempferol  | SF3B3   | 0.9643 |
| DH | Kaempferol  | SHBG    | 0.9643 |
| DH | Kaempferol  | SOAT1   | 0.8438 |
| DH | Kaempferol  | SOAT2   | 0.8438 |
| DH | Kaempferol  | SOLE    | 0.8065 |
| DH | Kaempferol  | STK17B  | 0.9643 |
| DH | Kaempferol  | SYK     | 0.8065 |
| DH | Kaempferol  | TOP2A   | 0.963  |
| DH | Kaempferol  | UBA1    | 0.9643 |
| DH | Kaempferol  | UGT3A1  | 1      |
| DH | Physcion    | AHR     | 0.8462 |
| DH | Physcion    | ALOX5   | 0.8846 |
| DH | Physcion    | CSNK2A1 | 0.8462 |
| DH | Physcion    | CYP1A2  | 0.8846 |
| DH | Physcion    | CYP2C9  | 0.8846 |
| DH | Physcion    | CYP2D6  | 0.8846 |
| DH | Physcion    | CYP2E1  | 0.8846 |
| DH | Physcion    | CYP3A4  | 0.8846 |
| DH | Physcion    | CYP3A43 | 0.8846 |
| DH | Physcion    | CYP3A5  | 0.8846 |
| DH | Physcion    | CYP3A7  | 0.8846 |
| DH | Physcion    | GSTA1   | 0.8846 |
| DH | Physcion    | GSTP1   | 0.8846 |
| DH | Physcion    | NR1H2   | 0.8846 |
| DH | Physcion    | NR1H3   | 0.8846 |
| DH | Physcion    | SHBG    | 0.8077 |
| DH | Epicatechin | ACTB    | 0.871  |
| DH | Epicatechin | AHR     | 0.8788 |
| DH | Epicatechin | AKT1    | 0.8065 |
| DH | Epicatechin | ATP5A1  | 0.871  |
| DH | Epicatechin | ATP5B   | 0.871  |
| DH | Epicatechin | ATP5C1  | 0.871  |
| DH | Epicatechin | CBR1    | 0.871  |
| DH | Epicatechin | CDK6    | 0.8387 |
| DH | Epicatechin | CEBPB   | 0.871  |
| DH | Epicatechin | COMT    | 0.8125 |
| DH | Epicatechin | CSNK2A1 | 0.871  |
| DH | Epicatechin | CSNK2B  | 0.871  |
| DH | Epicatechin | CYP1B1  | 0.871  |
| DH | Epicatechin | DHFRL1  | 0.8788 |
| DH | Epicatechin | DNMT1   | 0.8788 |
| DH | Epicatechin | EIF3F   | 0.871  |
| DH | Epicatechin | ESR1    | 0.871  |
| DH | Epicatechin | ESR2    | 0.871  |
| DH | Epicatechin | ESRRA   | 0.8065 |

|    |                         |          |        |
|----|-------------------------|----------|--------|
| DH | Epicatechin             | ESRRB    | 0.8065 |
| DH | Epicatechin             | GPER1    | 0.8065 |
| DH | Epicatechin             | HCK      | 0.871  |
| DH | Epicatechin             | HIBCH    | 0.871  |
| DH | Epicatechin             | HSP90AA1 | 0.871  |
| DH | Epicatechin             | HSPA2    | 0.871  |
| DH | Epicatechin             | JAK1     | 0.871  |
| DH | Epicatechin             | NCOA1    | 0.8065 |
| DH | Epicatechin             | NCOA2    | 0.8065 |
| DH | Epicatechin             | NQO2     | 0.871  |
| DH | Epicatechin             | NR1I2    | 0.871  |
| DH | Epicatechin             | PIK3CG   | 0.871  |
| DH | Epicatechin             | PIM1     | 0.871  |
| DH | Epicatechin             | PTK2B    | 0.8065 |
| DH | Epicatechin             | RUVBL2   | 0.871  |
| DH | Epicatechin             | SF3B3    | 0.871  |
| DH | Epicatechin             | SHBG     | 0.871  |
| DH | Epicatechin             | STK17B   | 0.871  |
| DH | Epicatechin             | TOP2A    | 0.8065 |
| DH | Epicatechin             | UBA1     | 0.871  |
| DH | Epicatechin             | UGT3A1   | 0.871  |
| DH | Kaempferol-3-Rhamnoside | ACTB     | 0.875  |
| DH | Kaempferol-3-Rhamnoside | AHR      | 0.8824 |
| DH | Kaempferol-3-Rhamnoside | AKR1C3   | 0.8421 |
| DH | Kaempferol-3-Rhamnoside | AKT1     | 0.8125 |
| DH | Kaempferol-3-Rhamnoside | ATP5A1   | 0.875  |
| DH | Kaempferol-3-Rhamnoside | ATP5B    | 0.875  |
| DH | Kaempferol-3-Rhamnoside | ATP5C1   | 0.875  |
| DH | Kaempferol-3-Rhamnoside | AURKB    | 0.8    |
| DH | Kaempferol-3-Rhamnoside | CA1      | 0.8485 |
| DH | Kaempferol-3-Rhamnoside | CA12     | 0.8485 |
| DH | Kaempferol-3-Rhamnoside | CA14     | 0.8485 |
| DH | Kaempferol-3-Rhamnoside | CA2      | 0.8485 |
| DH | Kaempferol-3-Rhamnoside | CA3      | 0.8485 |
| DH | Kaempferol-3-Rhamnoside | CA4      | 0.8485 |
| DH | Kaempferol-3-Rhamnoside | CA5A     | 0.8485 |
| DH | Kaempferol-3-Rhamnoside | CA5B     | 0.8485 |
| DH | Kaempferol-3-Rhamnoside | CA6      | 0.8485 |
| DH | Kaempferol-3-Rhamnoside | CA7      | 0.8485 |
| DH | Kaempferol-3-Rhamnoside | CA9      | 0.8485 |
| DH | Kaempferol-3-Rhamnoside | CBR1     | 0.875  |
| DH | Kaempferol-3-Rhamnoside | CDK6     | 0.8438 |
| DH | Kaempferol-3-Rhamnoside | CEBPB    | 0.875  |
| DH | Kaempferol-3-Rhamnoside | COMT     | 0.875  |
| DH | Kaempferol-3-Rhamnoside | CSNK2A1  | 0.875  |
| DH | Kaempferol-3-Rhamnoside | CSNK2B   | 0.875  |
| DH | Kaempferol-3-Rhamnoside | CYP1B1   | 0.875  |
| DH | Kaempferol-3-Rhamnoside | DHFRL1   | 0.8824 |
| DH | Kaempferol-3-Rhamnoside | DNMT1    | 0.8824 |
| DH | Kaempferol-3-Rhamnoside | EIF3F    | 0.875  |
| DH | Kaempferol-3-Rhamnoside | ESR1     | 0.875  |
| DH | Kaempferol-3-Rhamnoside | ESR2     | 0.875  |
| DH | Kaempferol-3-Rhamnoside | ESRRA    | 0.8125 |
| DH | Kaempferol-3-Rhamnoside | ESRRB    | 0.8125 |
| DH | Kaempferol-3-Rhamnoside | GABRA1   | 0.8529 |

|    |                                                                      |          |        |
|----|----------------------------------------------------------------------|----------|--------|
| DH | Kaempferol-3-Rhamnoside                                              | GABRA2   | 0.8529 |
| DH | Kaempferol-3-Rhamnoside                                              | GABRA3   | 0.8529 |
| DH | Kaempferol-3-Rhamnoside                                              | GABRA4   | 0.8529 |
| DH | Kaempferol-3-Rhamnoside                                              | GABRA5   | 0.8529 |
| DH | Kaempferol-3-Rhamnoside                                              | GABRA6   | 0.8529 |
| DH | Kaempferol-3-Rhamnoside                                              | GABRG1   | 0.8529 |
| DH | Kaempferol-3-Rhamnoside                                              | GABRG2   | 0.8529 |
| DH | Kaempferol-3-Rhamnoside                                              | GABRG3   | 0.8529 |
| DH | Kaempferol-3-Rhamnoside                                              | GPER1    | 0.8125 |
| DH | Kaempferol-3-Rhamnoside                                              | HCK      | 0.875  |
| DH | Kaempferol-3-Rhamnoside                                              | HIBCH    | 0.875  |
| DH | Kaempferol-3-Rhamnoside                                              | HSP90AA1 | 0.875  |
| DH | Kaempferol-3-Rhamnoside                                              | HSPA2    | 0.875  |
| DH | Kaempferol-3-Rhamnoside                                              | IGHG1    | 0.8125 |
| DH | Kaempferol-3-Rhamnoside                                              | JAK1     | 0.875  |
| DH | Kaempferol-3-Rhamnoside                                              | MTTP     | 0.8286 |
| DH | Kaempferol-3-Rhamnoside                                              | NCOA1    | 0.8125 |
| DH | Kaempferol-3-Rhamnoside                                              | NCOA2    | 0.8125 |
| DH | Kaempferol-3-Rhamnoside                                              | NQO2     | 0.875  |
| DH | Kaempferol-3-Rhamnoside                                              | NR1I2    | 0.875  |
| DH | Kaempferol-3-Rhamnoside                                              | PIK3CG   | 0.875  |
| DH | Kaempferol-3-Rhamnoside                                              | PIM1     | 0.875  |
| DH | Kaempferol-3-Rhamnoside                                              | PRKACA   | 0.8485 |
| DH | Kaempferol-3-Rhamnoside                                              | PRKCA    | 0.8485 |
| DH | Kaempferol-3-Rhamnoside                                              | PRKCB    | 0.8485 |
| DH | Kaempferol-3-Rhamnoside                                              | PTK2B    | 0.8125 |
| DH | Kaempferol-3-Rhamnoside                                              | RUVBL2   | 0.875  |
| DH | Kaempferol-3-Rhamnoside                                              | SF3B3    | 0.875  |
| DH | Kaempferol-3-Rhamnoside                                              | SHBG     | 0.875  |
| DH | Kaempferol-3-Rhamnoside                                              | SOAT1    | 0.8286 |
| DH | Kaempferol-3-Rhamnoside                                              | SOAT2    | 0.8286 |
| DH | Kaempferol-3-Rhamnoside                                              | SOLE     | 0.8485 |
| DH | Kaempferol-3-Rhamnoside                                              | STK17B   | 0.875  |
| DH | Kaempferol-3-Rhamnoside                                              | SYK      | 0.8485 |
| DH | Kaempferol-3-Rhamnoside                                              | TOP2A    | 0.8125 |
| DH | Kaempferol-3-Rhamnoside                                              | UBA1     | 0.875  |
| DH | Kaempferol-3-Rhamnoside                                              | UGT3A1   | 0.875  |
| DH | 3,4,5-Trihydroxybenzoic<br>Acid,Gallic<br>Acid,Gallicacidmonohydrate | AKR1C1   | 0.8636 |
| DH | 3,4,5-Trihydroxybenzoic<br>Acid,Gallic<br>Acid,Gallicacidmonohydrate | ATP5A1   | 0.8333 |
| DH | 3,4,5-Trihydroxybenzoic<br>Acid,Gallic<br>Acid,Gallicacidmonohydrate | ATP5B    | 0.8333 |
| DH | 3,4,5-Trihydroxybenzoic<br>Acid,Gallic<br>Acid,Gallicacidmonohydrate | ATP5C1   | 0.8333 |
| DH | 3,4,5-Trihydroxybenzoic<br>Acid,Gallic<br>Acid,Gallicacidmonohydrate | CTRB1    | 0.8696 |
| DH | 3,4,5-Trihydroxybenzoic<br>Acid,Gallic<br>Acid,Gallicacidmonohydrate | LCN2     | 1      |



|    |                                                                      |              |        |
|----|----------------------------------------------------------------------|--------------|--------|
| DH | 3,4,5-Trihydroxybenzoic<br>Acid,Gallic<br>Acid,Gallicacidmonohydrate | MIF          | 0.8696 |
| DH | 3,4,5-Trihydroxybenzoic<br>Acid,Gallic<br>Acid,Gallicacidmonohydrate | PTGS1        | 0.8636 |
| DH | 3,4,5-Trihydroxybenzoic<br>Acid,Gallic<br>Acid,Gallicacidmonohydrate | PTGS2        | 0.8636 |
| DH | 1-O-Galloyl-Glucose                                                  | AHR          | 0.8049 |
| DH | 1-O-Galloyl-Glucose                                                  | AKR1C3       | 0.8462 |
| DH | 1-O-Galloyl-Glucose                                                  | ALDH2        | 0.8947 |
| DH | 1-O-Galloyl-Glucose                                                  | AMY1A        | 0.8235 |
| DH | 1-O-Galloyl-Glucose                                                  | AMY2A        | 0.8235 |
| DH | 1-O-Galloyl-Glucose                                                  | AMY2B        | 0.8333 |
| DH | 1-O-Galloyl-Glucose                                                  | AR           | 0.9189 |
| DH | 1-O-Galloyl-Glucose                                                  | AURKB        | 0.8049 |
| DH | 1-O-Galloyl-Glucose                                                  | BAMF RS28815 | 0.8235 |
| DH | 1-O-Galloyl-Glucose                                                  | CBR1         | 0.8462 |
| DH | 1-O-Galloyl-Glucose                                                  | GCK          | 0.8235 |
| DH | 1-O-Galloyl-Glucose                                                  | GLT6D1       | 0.8333 |
| DH | 1-O-Galloyl-Glucose                                                  | GLTP         | 0.8333 |
| DH | 1-O-Galloyl-Glucose                                                  | GNPDA1       | 0.8235 |
| DH | 1-O-Galloyl-Glucose                                                  | HK1          | 0.8235 |
| DH | 1-O-Galloyl-Glucose                                                  | IFNB1        | 0.8235 |
| DH | 1-O-Galloyl-Glucose                                                  | KRTAP5-2     | 0.8235 |
| DH | 1-O-Galloyl-Glucose                                                  | KRTAP5-3     | 0.8235 |
| DH | 1-O-Galloyl-Glucose                                                  | LCT          | 0.8529 |
| DH | 1-O-Galloyl-Glucose                                                  | LCTL         | 0.8235 |
| DH | 1-O-Galloyl-Glucose                                                  | LGALS2       | 0.8235 |
| DH | 1-O-Galloyl-Glucose                                                  | LGALS3       | 0.8333 |
| DH | 1-O-Galloyl-Glucose                                                  | LGALS7       | 0.8235 |
| DH | 1-O-Galloyl-Glucose                                                  | MB           | 0.8235 |
| DH | 1-O-Galloyl-Glucose                                                  | MBL2         | 0.8056 |
| DH | 1-O-Galloyl-Glucose                                                  | NCAN         | 0.8235 |
| DH | 1-O-Galloyl-Glucose                                                  | NUDT9        | 0.8235 |
| DH | 1-O-Galloyl-Glucose                                                  | PTGS1        | 0.8235 |
| DH | 1-O-Galloyl-Glucose                                                  | PYGL         | 0.8235 |
| DH | 1-O-Galloyl-Glucose                                                  | PYGM         | 0.8235 |
| DH | 1-O-Galloyl-Glucose                                                  | SFTPD        | 0.8235 |
| DH | 1-O-Galloyl-Glucose                                                  | SIGLEC1      | 0.8235 |
| DH | 1-O-Galloyl-Glucose                                                  | SMARCA5      | 0.8235 |
| DH | 1-O-Galloyl-Glucose                                                  | TM0024       | 0.8235 |
| DH | 1-O-Galloyl-Glucose                                                  | TYR          | 0.9412 |
| DH | 1,2,6-Tri-O-Galloyl- $\beta$ -D-<br>Glucose                          | AHR          | 0.8049 |
| DH | 1,2,6-Tri-O-Galloyl- $\beta$ -D-<br>Glucose                          | AKR1C3       | 0.8462 |
| DH | 1,2,6-Tri-O-Galloyl- $\beta$ -D-<br>Glucose                          | ALDH2        | 0.8462 |
| DH | 1,2,6-Tri-O-Galloyl- $\beta$ -D-<br>Glucose                          | AR           | 0.8684 |
| DH | 1,2,6-Tri-O-Galloyl- $\beta$ -D-<br>Glucose                          | AURKB        | 0.8049 |

|    |                                         |         |        |
|----|-----------------------------------------|---------|--------|
| DH | 1,2,6-Tri-O-Galloyl- $\beta$ -D-Glucose | CBR1    | 0.8462 |
| DH | 1,2,6-Tri-O-Galloyl- $\beta$ -D-Glucose | LCT     | 0.8    |
| DH | 1,2,6-Tri-O-Galloyl- $\beta$ -D-Glucose | TYR     | 0.8857 |
| DH | Emodin                                  | AHR     | 1      |
| DH | Emodin                                  | ALOX5   | 0.875  |
| DH | Emodin                                  | CSNK2A1 | 1      |
| DH | Emodin                                  | CYP1A2  | 0.8077 |
| DH | Emodin                                  | CYP2C9  | 0.8077 |
| DH | Emodin                                  | CYP2D6  | 0.8077 |
| DH | Emodin                                  | CYP2E1  | 0.8077 |
| DH | Emodin                                  | CYP3A4  | 0.8077 |
| DH | Emodin                                  | CYP3A43 | 0.8077 |
| DH | Emodin                                  | CYP3A5  | 0.8077 |
| DH | Emodin                                  | CYP3A7  | 0.8077 |
| DH | Emodin                                  | GSTA1   | 0.9583 |
| DH | Emodin                                  | GSTP1   | 0.9583 |
| DH | Emodin                                  | NR1H2   | 0.875  |
| DH | Emodin                                  | NR1H3   | 0.875  |
| DH | Proanthocyanidin B2,Procyanidinb2       | ACTB    | 0.8438 |
| DH | Proanthocyanidin B2,Procyanidinb2       | AHR     | 0.8529 |
| DH | Proanthocyanidin B2,Procyanidinb2       | ATP5A1  | 0.8438 |
| DH | Proanthocyanidin B2,Procyanidinb2       | ATP5B   | 0.8438 |
| DH | Proanthocyanidin B2,Procyanidinb2       | ATP5C1  | 0.8438 |
| DH | Proanthocyanidin B2,Procyanidinb2       | CBR1    | 0.8438 |
| DH | Proanthocyanidin B2,Procyanidinb2       | CDK6    | 0.8125 |
| DH | Proanthocyanidin B2,Procyanidinb2       | CEBPB   | 0.8438 |
| DH | Proanthocyanidin B2,Procyanidinb2       | CSNK2A1 | 0.8438 |
| DH | Proanthocyanidin B2,Procyanidinb2       | CSNK2B  | 0.8438 |
| DH | Proanthocyanidin B2,Procyanidinb2       | CYP1B1  | 0.8438 |
| DH | Proanthocyanidin B2,Procyanidinb2       | DHFRL1  | 0.8529 |
| DH | Proanthocyanidin B2,Procyanidinb2       | DNMT1   | 0.8529 |
| DH | Proanthocyanidin B2,Procyanidinb2       | EIF3F   | 0.8438 |
| DH | Proanthocyanidin B2,Procyanidinb2       | ESR1    | 0.8438 |
| DH | Proanthocyanidin B2,Procyanidinb2       | ESR2    | 0.8438 |
| DH | Proanthocyanidin B2,Procyanidinb2       | HCK     | 0.8438 |

|    |                                      |          |        |
|----|--------------------------------------|----------|--------|
| DH | Proanthocyanidin<br>B2,Procyanidinb2 | HIBCH    | 0.8438 |
| DH | Proanthocyanidin<br>B2,Procyanidinb2 | HSP90AA1 | 0.8438 |
| DH | Proanthocyanidin<br>B2,Procyanidinb2 | HSPA2    | 0.8438 |
| DH | Proanthocyanidin<br>B2,Procyanidinb2 | JAK1     | 0.8438 |
| DH | Proanthocyanidin<br>B2,Procyanidinb2 | NQO2     | 0.8438 |
| DH | Proanthocyanidin<br>B2,Procyanidinb2 | NR1I2    | 0.8438 |
| DH | Proanthocyanidin<br>B2,Procyanidinb2 | PIK3CG   | 0.8438 |
| DH | Proanthocyanidin<br>B2,Procyanidinb2 | PIM1     | 0.8438 |
| DH | Proanthocyanidin<br>B2,Procyanidinb2 | RUVBL2   | 0.8438 |
| DH | Proanthocyanidin<br>B2,Procyanidinb2 | SF3B3    | 0.8438 |
| DH | Proanthocyanidin<br>B2,Procyanidinb2 | SHBG     | 0.8438 |
| DH | Proanthocyanidin<br>B2,Procyanidinb2 | STK17B   | 0.8438 |
| DH | Proanthocyanidin<br>B2,Procyanidinb2 | UBA1     | 0.8438 |
| DH | Proanthocyanidin<br>B2,Procyanidinb2 | UGT3A1   | 0.8438 |
| DH | Procyanidin B1                       | ACTB     | 0.8438 |
| DH | Procyanidin B1                       | AHR      | 0.8529 |
| DH | Procyanidin B1                       | ATP5A1   | 0.8438 |
| DH | Procyanidin B1                       | ATP5B    | 0.8438 |
| DH | Procyanidin B1                       | ATP5C1   | 0.8438 |
| DH | Procyanidin B1                       | CBR1     | 0.8438 |
| DH | Procyanidin B1                       | CDK6     | 0.8125 |
| DH | Procyanidin B1                       | CEBPB    | 0.8438 |
| DH | Procyanidin B1                       | CSNK2A1  | 0.8438 |
| DH | Procyanidin B1                       | CSNK2B   | 0.8438 |
| DH | Procyanidin B1                       | CYP1B1   | 0.8438 |
| DH | Procyanidin B1                       | DHFRL1   | 0.8529 |
| DH | Procyanidin B1                       | DNMT1    | 0.8529 |
| DH | Procyanidin B1                       | EIF3F    | 0.8438 |
| DH | Procyanidin B1                       | ESR1     | 0.8438 |
| DH | Procyanidin B1                       | ESR2     | 0.8438 |
| DH | Procyanidin B1                       | HCK      | 0.8438 |
| DH | Procyanidin B1                       | HIBCH    | 0.8438 |
| DH | Procyanidin B1                       | HSP90AA1 | 0.8438 |
| DH | Procyanidin B1                       | HSPA2    | 0.8438 |
| DH | Procyanidin B1                       | JAK1     | 0.8438 |
| DH | Procyanidin B1                       | NQO2     | 0.8438 |
| DH | Procyanidin B1                       | NR1I2    | 0.8438 |
| DH | Procyanidin B1                       | PIK3CG   | 0.8438 |
| DH | Procyanidin B1                       | PIM1     | 0.8438 |
| DH | Procyanidin B1                       | RUVBL2   | 0.8438 |
| DH | Procyanidin B1                       | SF3B3    | 0.8438 |

|    |                |          |        |
|----|----------------|----------|--------|
| DH | Procyanidin B1 | SHBG     | 0.8438 |
| DH | Procyanidin B1 | STK17B   | 0.8438 |
| DH | Procyanidin B1 | UBA1     | 0.8438 |
| DH | Procyanidin B1 | UGT3A1   | 0.8438 |
| DH | Procyanidin B3 | ACTB     | 0.8438 |
| DH | Procyanidin B3 | AHR      | 0.8529 |
| DH | Procyanidin B3 | ATP5A1   | 0.8438 |
| DH | Procyanidin B3 | ATP5B    | 0.8438 |
| DH | Procyanidin B3 | ATP5C1   | 0.8438 |
| DH | Procyanidin B3 | CBR1     | 0.8438 |
| DH | Procyanidin B3 | CDK6     | 0.8125 |
| DH | Procyanidin B3 | CEBPB    | 0.8438 |
| DH | Procyanidin B3 | CSNK2A1  | 0.8438 |
| DH | Procyanidin B3 | CSNK2B   | 0.8438 |
| DH | Procyanidin B3 | CYP1B1   | 0.8438 |
| DH | Procyanidin B3 | DHFRL1   | 0.8529 |
| DH | Procyanidin B3 | DNMT1    | 0.8529 |
| DH | Procyanidin B3 | EIF3F    | 0.8438 |
| DH | Procyanidin B3 | ESR1     | 0.8438 |
| DH | Procyanidin B3 | ESR2     | 0.8438 |
| DH | Procyanidin B3 | HCK      | 0.8438 |
| DH | Procyanidin B3 | HIBCH    | 0.8438 |
| DH | Procyanidin B3 | HSP90AA1 | 0.8438 |
| DH | Procyanidin B3 | HSPA2    | 0.8438 |
| DH | Procyanidin B3 | JAK1     | 0.8438 |
| DH | Procyanidin B3 | NQO2     | 0.8438 |
| DH | Procyanidin B3 | NR1I2    | 0.8438 |
| DH | Procyanidin B3 | PIK3CG   | 0.8438 |
| DH | Procyanidin B3 | PIM1     | 0.8438 |
| DH | Procyanidin B3 | RUVBL2   | 0.8438 |
| DH | Procyanidin B3 | SF3B3    | 0.8438 |
| DH | Procyanidin B3 | SHBG     | 0.8438 |
| DH | Procyanidin B3 | STK17B   | 0.8438 |
| DH | Procyanidin B3 | UBA1     | 0.8438 |
| DH | Procyanidin B3 | UGT3A1   | 0.8438 |
| DH | Chrysophanol   | AHR      | 0.9565 |
| DH | Chrysophanol   | ALOX5    | 0.913  |
| DH | Chrysophanol   | CSNK2A1  | 0.9565 |
| DH | Chrysophanol   | CYP1A2   | 0.84   |
| DH | Chrysophanol   | CYP2C9   | 0.84   |
| DH | Chrysophanol   | CYP2D6   | 0.84   |
| DH | Chrysophanol   | CYP2E1   | 0.84   |
| DH | Chrysophanol   | CYP3A4   | 0.84   |
| DH | Chrysophanol   | CYP3A43  | 0.84   |
| DH | Chrysophanol   | CYP3A5   | 0.84   |
| DH | Chrysophanol   | CYP3A7   | 0.84   |
| DH | Chrysophanol   | GSTA1    | 0.9167 |
| DH | Chrysophanol   | GSTP1    | 0.9167 |
| DH | Chrysophanol   | KRT12    | 0.8261 |
| DH | Chrysophanol   | KRT2     | 0.8261 |
| DH | Chrysophanol   | MAPK8IP1 | 0.8261 |
| DH | Chrysophanol   | NR1H2    | 0.913  |
| DH | Chrysophanol   | NR1H3    | 0.913  |
| DH | Catechin       | ACTB     | 0.871  |
| DH | Catechin       | AHR      | 0.8788 |

|    |                                              |          |        |
|----|----------------------------------------------|----------|--------|
| DH | Catechin                                     | AKT1     | 0.8065 |
| DH | Catechin                                     | ATP5A1   | 0.871  |
| DH | Catechin                                     | ATP5B    | 0.871  |
| DH | Catechin                                     | ATP5C1   | 0.871  |
| DH | Catechin                                     | CBR1     | 0.871  |
| DH | Catechin                                     | CDK6     | 0.8387 |
| DH | Catechin                                     | CEBPB    | 0.871  |
| DH | Catechin                                     | COMT     | 0.8125 |
| DH | Catechin                                     | CSNK2A1  | 0.871  |
| DH | Catechin                                     | CSNK2B   | 0.871  |
| DH | Catechin                                     | CYP1B1   | 0.871  |
| DH | Catechin                                     | DHFRL1   | 0.8788 |
| DH | Catechin                                     | DNMT1    | 0.8788 |
| DH | Catechin                                     | EIF3F    | 0.871  |
| DH | Catechin                                     | ESR1     | 0.871  |
| DH | Catechin                                     | ESR2     | 0.871  |
| DH | Catechin                                     | ESRRA    | 0.8065 |
| DH | Catechin                                     | ESRRB    | 0.8065 |
| DH | Catechin                                     | GPER1    | 0.8065 |
| DH | Catechin                                     | HCK      | 0.871  |
| DH | Catechin                                     | HIBCH    | 0.871  |
| DH | Catechin                                     | HSP90AA1 | 0.871  |
| DH | Catechin                                     | HSPA2    | 0.871  |
| DH | Catechin                                     | JAK1     | 0.871  |
| DH | Catechin                                     | NCOA1    | 0.8065 |
| DH | Catechin                                     | NCOA2    | 0.8065 |
| DH | Catechin                                     | NQO2     | 0.871  |
| DH | Catechin                                     | NR1I2    | 0.871  |
| DH | Catechin                                     | PIK3CG   | 0.871  |
| DH | Catechin                                     | PIM1     | 0.871  |
| DH | Catechin                                     | PTK2B    | 0.8065 |
| DH | Catechin                                     | RUVBL2   | 0.871  |
| DH | Catechin                                     | SF3B3    | 0.871  |
| DH | Catechin                                     | SHBG     | 0.871  |
| DH | Catechin                                     | STK17B   | 0.871  |
| DH | Catechin                                     | TOP2A    | 0.8065 |
| DH | Catechin                                     | UBA1     | 0.871  |
| DH | Catechin                                     | UGT3A1   | 0.871  |
| DH | Phycion-8-Î <sup>1</sup> '-D-Glucopyranoside | ABO      | 0.8095 |
| DH | Phycion-8-Î <sup>1</sup> '-D-Glucopyranoside | AHR      | 0.907  |
| DH | Phycion-8-Î <sup>1</sup> '-D-Glucopyranoside | AKR1C3   | 0.8605 |
| DH | Phycion-8-Î <sup>1</sup> '-D-Glucopyranoside | ALDH2    | 0.8605 |
| DH | Phycion-8-Î <sup>1</sup> '-D-Glucopyranoside | AR       | 0.881  |
| DH | Phycion-8-Î <sup>1</sup> '-D-Glucopyranoside | AURKB    | 0.907  |
| DH | Phycion-8-Î <sup>1</sup> '-D-Glucopyranoside | CBR1     | 0.8605 |
| DH | Chrysoarobin,Chrysophanol-9-Anthrone         | AHR      | 0.8    |

|    |                                            |              |        |
|----|--------------------------------------------|--------------|--------|
| DH | Chrysarobin,Chrysophanol-9-Anthrone        | CSNK2A1      | 0.8    |
| DH | Chrysarobin,Chrysophanol-9-Anthrone        | KRT12        | 0.9091 |
| DH | Chrysarobin,Chrysophanol-9-Anthrone        | KRT2         | 0.9091 |
| DH | Chrysarobin,Chrysophanol-9-Anthrone        | MAPK8IP1     | 0.9091 |
| DH | Rheinosidea                                | ATP1A1       | 0.8868 |
| DH | Rheinosidea                                | ATP1A2       | 0.8868 |
| DH | Rheinosidea                                | ATP1A3       | 0.8868 |
| DH | Rheinosidea                                | IL1B         | 0.8113 |
| DH | Rheinosidea                                | IL6          | 0.8113 |
| DH | Rheinosidea                                | NFKB1        | 0.8113 |
| DH | Rheinosidea                                | NFKB2        | 0.8113 |
| DH | Rheinosidea                                | PPP1CC       | 0.8302 |
| DH | Rheinosidea                                | SLCO1B3      | 0.8679 |
| DH | Rheinosidea                                | TNF          | 0.8113 |
| DH | Piceatannol                                | ATP5A1       | 1      |
| DH | Piceatannol                                | ATP5B        | 1      |
| DH | Piceatannol                                | ATP5C1       | 1      |
| DH | Piceatannol                                | LCN2         | 0.8333 |
| DH | Torachryson8-O- $\beta$ -D-Glucopyranoside | ABO          | 0.8095 |
| DH | Torachryson8-O- $\beta$ -D-Glucopyranoside | AHR          | 0.907  |
| DH | Torachryson8-O- $\beta$ -D-Glucopyranoside | AKR1C3       | 0.8605 |
| DH | Torachryson8-O- $\beta$ -D-Glucopyranoside | ALDH2        | 0.8605 |
| DH | Torachryson8-O- $\beta$ -D-Glucopyranoside | AR           | 0.881  |
| DH | Torachryson8-O- $\beta$ -D-Glucopyranoside | AURKB        | 0.907  |
| DH | Torachryson8-O- $\beta$ -D-Glucopyranoside | CBR1         | 0.8605 |
| DH | Torachryson8-O- $\beta$ -D-Glucopyranoside | TOP2A        | 0.8085 |
| DH | Torachryson8-O- $\beta$ -D-Glucopyranoside | TOP2B        | 0.8085 |
| DH | 2-O-Cinnamoyl- $\beta$ -D-Glucose          | ABO          | 0.8108 |
| DH | 2-O-Cinnamoyl- $\beta$ -D-Glucose          | ALDH2        | 0.8205 |
| DH | 2-O-Cinnamoyl- $\beta$ -D-Glucose          | AMY1A        | 0.8485 |
| DH | 2-O-Cinnamoyl- $\beta$ -D-Glucose          | AMY2A        | 0.8485 |
| DH | 2-O-Cinnamoyl- $\beta$ -D-Glucose          | AMY2B        | 0.8571 |
| DH | 2-O-Cinnamoyl- $\beta$ -D-Glucose          | AR           | 0.8421 |
| DH | 2-O-Cinnamoyl- $\beta$ -D-Glucose          | BAMF RS28815 | 0.8485 |
| DH | 2-O-Cinnamoyl- $\beta$ -D-Glucose          | GCK          | 0.8485 |
| DH | 2-O-Cinnamoyl- $\beta$ -D-Glucose          | GLT6D1       | 0.8571 |
| DH | 2-O-Cinnamoyl- $\beta$ -D-Glucose          | GLTP         | 0.8571 |
| DH | 2-O-Cinnamoyl- $\beta$ -D-Glucose          | GNPDA1       | 0.8485 |
| DH | 2-O-Cinnamoyl- $\beta$ -D-Glucose          | HK1          | 0.8485 |
| DH | 2-O-Cinnamoyl- $\beta$ -D-Glucose          | IFNB1        | 0.8485 |
| DH | 2-O-Cinnamoyl- $\beta$ -D-Glucose          | KRTAP5-2     | 0.8485 |
| DH | 2-O-Cinnamoyl- $\beta$ -D-Glucose          | KRTAP5-3     | 0.8485 |

|    |                          |          |        |
|----|--------------------------|----------|--------|
| DH | 2-O-Cinnamoyl-Î'-Glucose | LCT      | 0.8788 |
| DH | 2-O-Cinnamoyl-Î'-Glucose | LCTL     | 0.8485 |
| DH | 2-O-Cinnamoyl-Î'-Glucose | LGALS2   | 0.8485 |
| DH | 2-O-Cinnamoyl-Î'-Glucose | LGALS3   | 0.8571 |
| DH | 2-O-Cinnamoyl-Î'-Glucose | LGALS7   | 0.8485 |
| DH | 2-O-Cinnamoyl-Î'-Glucose | MB       | 0.8485 |
| DH | 2-O-Cinnamoyl-Î'-Glucose | MBL2     | 0.8286 |
| DH | 2-O-Cinnamoyl-Î'-Glucose | NCAN     | 0.8485 |
| DH | 2-O-Cinnamoyl-Î'-Glucose | NUDT9    | 0.8485 |
| DH | 2-O-Cinnamoyl-Î'-Glucose | PTGS1    | 0.8485 |
| DH | 2-O-Cinnamoyl-Î'-Glucose | PYGL     | 0.8485 |
| DH | 2-O-Cinnamoyl-Î'-Glucose | PYGM     | 0.8485 |
| DH | 2-O-Cinnamoyl-Î'-Glucose | SFTPD    | 0.8485 |
| DH | 2-O-Cinnamoyl-Î'-Glucose | SIGLEC1  | 0.8485 |
| DH | 2-O-Cinnamoyl-Î'-Glucose | SMARCA5  | 0.8485 |
| DH | 2-O-Cinnamoyl-Î'-Glucose | TM0024   | 0.8485 |
| DH | 2-O-Cinnamoyl-Î'-Glucose | TYR      | 0.9118 |
| DH | Procyanidin B4           | ACTB     | 0.8438 |
| DH | Procyanidin B4           | AHR      | 0.8529 |
| DH | Procyanidin B4           | ATP5A1   | 0.8438 |
| DH | Procyanidin B4           | ATP5B    | 0.8438 |
| DH | Procyanidin B4           | ATP5C1   | 0.8438 |
| DH | Procyanidin B4           | CBR1     | 0.8438 |
| DH | Procyanidin B4           | CDK6     | 0.8125 |
| DH | Procyanidin B4           | CEBPB    | 0.8438 |
| DH | Procyanidin B4           | CSNK2A1  | 0.8438 |
| DH | Procyanidin B4           | CSNK2B   | 0.8438 |
| DH | Procyanidin B4           | CYP1B1   | 0.8438 |
| DH | Procyanidin B4           | DHFRL1   | 0.8529 |
| DH | Procyanidin B4           | DNMT1    | 0.8529 |
| DH | Procyanidin B4           | EIF3F    | 0.8438 |
| DH | Procyanidin B4           | ESR1     | 0.8438 |
| DH | Procyanidin B4           | ESR2     | 0.8438 |
| DH | Procyanidin B4           | HCK      | 0.8438 |
| DH | Procyanidin B4           | HIBCH    | 0.8438 |
| DH | Procyanidin B4           | HSP90AA1 | 0.8438 |
| DH | Procyanidin B4           | HSPA2    | 0.8438 |
| DH | Procyanidin B4           | JAK1     | 0.8438 |
| DH | Procyanidin B4           | NQO2     | 0.8438 |
| DH | Procyanidin B4           | NR1I2    | 0.8438 |
| DH | Procyanidin B4           | PIK3CG   | 0.8438 |
| DH | Procyanidin B4           | PIM1     | 0.8438 |
| DH | Procyanidin B4           | RUVBL2   | 0.8438 |
| DH | Procyanidin B4           | SF3B3    | 0.8438 |
| DH | Procyanidin B4           | SHBG     | 0.8438 |
| DH | Procyanidin B4           | STK17B   | 0.8438 |
| DH | Procyanidin B4           | UBA1     | 0.8438 |
| DH | Procyanidin B4           | UGT3A1   | 0.8438 |
| DH | Rheinosideb              | AR       | 0.814  |
| DH | Rheinosided              | AHR      | 0.8043 |
| DH | Rheinosided              | AURKB    | 0.8043 |
| DH | Sennosidec               | AHR      | 0.8605 |
| DH | Sennosidec               | AKR1C3   | 0.9024 |
| DH | Sennosidec               | ALDH2    | 0.95   |
| DH | Sennosidec               | AMY2B    | 0.8    |

|    |               |         |        |
|----|---------------|---------|--------|
| DH | Sennosidec    | AR      | 0.925  |
| DH | Sennosidec    | AURKB   | 0.8605 |
| DH | Sennosidec    | CBR1    | 0.9024 |
| DH | Sennosidec    | DHFRL1  | 0.8    |
| DH | Sennosidec    | DNMT1   | 0.8    |
| DH | Sennosidec    | GLT6D1  | 0.8    |
| DH | Sennosidec    | GLTP    | 0.8    |
| DH | Sennosidec    | LGALS3  | 0.8    |
| DH | Sennosidec    | TYR     | 0.8    |
| DH | Sennosided    | AHR     | 0.8605 |
| DH | Sennosided    | AKR1C3  | 0.9024 |
| DH | Sennosided    | ALDH2   | 0.95   |
| DH | Sennosided    | AMY2B   | 0.8    |
| DH | Sennosided    | AR      | 0.925  |
| DH | Sennosided    | AURKB   | 0.8605 |
| DH | Sennosided    | CBR1    | 0.9024 |
| DH | Sennosided    | DHFRL1  | 0.8    |
| DH | Sennosided    | DNMT1   | 0.8    |
| DH | Sennosided    | GLT6D1  | 0.8    |
| DH | Sennosided    | GLTP    | 0.8    |
| DH | Sennosided    | LGALS3  | 0.8    |
| DH | Sennosided    | TYR     | 0.8    |
| DH | Sennidinb     | AHR     | 0.84   |
| DH | Sennidinb     | ALOX5   | 0.9565 |
| DH | Sennidinb     | CSNK2A1 | 0.84   |
| DH | Sennidinb     | CYP1A2  | 0.8077 |
| DH | Sennidinb     | CYP2C9  | 0.8077 |
| DH | Sennidinb     | CYP2D6  | 0.8077 |
| DH | Sennidinb     | CYP2E1  | 0.8077 |
| DH | Sennidinb     | CYP3A4  | 0.8077 |
| DH | Sennidinb     | CYP3A43 | 0.8077 |
| DH | Sennidinb     | CYP3A5  | 0.8077 |
| DH | Sennidinb     | CYP3A7  | 0.8077 |
| DH | Sennidinb     | GSTA1   | 0.8077 |
| DH | Sennidinb     | GSTP1   | 0.8077 |
| DH | Sennidinb     | IGHG1   | 0.8148 |
| DH | Sennidinb     | NR1H2   | 0.9565 |
| DH | Sennidinb     | NR1H3   | 0.9565 |
| DH | Sennidinb     | PTGS1   | 0.8    |
| DH | Sennidinb     | PTGS2   | 0.8    |
| DH | Rhatannin     | TAT     | 0.8621 |
| DH | Rhatannin     | TH      | 0.8621 |
| DH | Rhatannin     | YARS2   | 0.8621 |
| DH | Procyanidinb6 | ACTB    | 0.8438 |
| DH | Procyanidinb6 | AHR     | 0.8529 |
| DH | Procyanidinb6 | ATP5A1  | 0.8438 |
| DH | Procyanidinb6 | ATP5B   | 0.8438 |
| DH | Procyanidinb6 | ATP5C1  | 0.8438 |
| DH | Procyanidinb6 | CBR1    | 0.8438 |
| DH | Procyanidinb6 | CDK6    | 0.8125 |
| DH | Procyanidinb6 | CEBPB   | 0.8438 |
| DH | Procyanidinb6 | CSNK2A1 | 0.8438 |
| DH | Procyanidinb6 | CSNK2B  | 0.8438 |
| DH | Procyanidinb6 | CYP1B1  | 0.8438 |
| DH | Procyanidinb6 | DHFRL1  | 0.8529 |



|    |                                                               |          |        |
|----|---------------------------------------------------------------|----------|--------|
| DH | Procyanidinb6                                                 | DNMT1    | 0.8529 |
| DH | Procyanidinb6                                                 | EIF3F    | 0.8438 |
| DH | Procyanidinb6                                                 | ESR1     | 0.8438 |
| DH | Procyanidinb6                                                 | ESR2     | 0.8438 |
| DH | Procyanidinb6                                                 | HCK      | 0.8438 |
| DH | Procyanidinb6                                                 | HIBCH    | 0.8438 |
| DH | Procyanidinb6                                                 | HSP90AA1 | 0.8438 |
| DH | Procyanidinb6                                                 | HSPA2    | 0.8438 |
| DH | Procyanidinb6                                                 | JAK1     | 0.8438 |
| DH | Procyanidinb6                                                 | NQO2     | 0.8438 |
| DH | Procyanidinb6                                                 | NR1I2    | 0.8438 |
| DH | Procyanidinb6                                                 | PIK3CG   | 0.8438 |
| DH | Procyanidinb6                                                 | PIM1     | 0.8438 |
| DH | Procyanidinb6                                                 | RUVBL2   | 0.8438 |
| DH | Procyanidinb6                                                 | SF3B3    | 0.8438 |
| DH | Procyanidinb6                                                 | SHBG     | 0.8438 |
| DH | Procyanidinb6                                                 | STK17B   | 0.8438 |
| DH | Procyanidinb6                                                 | UBA1     | 0.8438 |
| DH | Procyanidinb6                                                 | UGT3A1   | 0.8438 |
| DH | Aloemodin-1 <sup>©</sup> -O-1 <sup>†</sup> -D-Glucopyranoside | AHR      | 0.814  |
| DH | Aloemodin-1 <sup>©</sup> -O-1 <sup>†</sup> -D-Glucopyranoside | AKR1C3   | 0.8537 |
| DH | Aloemodin-1 <sup>©</sup> -O-1 <sup>†</sup> -D-Glucopyranoside | ALDH2    | 0.9    |
| DH | Aloemodin-1 <sup>©</sup> -O-1 <sup>†</sup> -D-Glucopyranoside | AR       | 0.9231 |
| DH | Aloemodin-1 <sup>©</sup> -O-1 <sup>†</sup> -D-Glucopyranoside | AURKB    | 0.814  |
| DH | Aloemodin-1 <sup>©</sup> -O-1 <sup>†</sup> -D-Glucopyranoside | CBR1     | 0.8537 |
| DH | Aloemodin-1 <sup>©</sup> -O-1 <sup>†</sup> -D-Glucopyranoside | TYR      | 0.8421 |
| DH | (+)-Catechin-5-O-Glucoside                                    | AHR      | 0.8571 |
| DH | (+)-Catechin-5-O-Glucoside                                    | AKR1C3   | 0.9    |
| DH | (+)-Catechin-5-O-Glucoside                                    | ALDH2    | 0.9487 |
| DH | (+)-Catechin-5-O-Glucoside                                    | AR       | 0.9231 |
| DH | (+)-Catechin-5-O-Glucoside                                    | AURKB    | 0.8571 |
| DH | (+)-Catechin-5-O-Glucoside                                    | CBR1     | 0.9    |
| DH | (+)-Catechin-5-O-Glucoside                                    | TYR      | 0.8421 |
| DH | Chrysophanol-8-O-1 <sup>†</sup> -D-Glucopyranoside            | AHR      | 0.8571 |
| DH | Chrysophanol-8-O-1 <sup>†</sup> -D-Glucopyranoside            | AKR1C3   | 0.9    |
| DH | Chrysophanol-8-O-1 <sup>†</sup> -D-Glucopyranoside            | ALDH2    | 0.9    |
| DH | Chrysophanol-8-O-1 <sup>†</sup> -D-Glucopyranoside            | AR       | 0.9231 |
| DH | Chrysophanol-8-O-1 <sup>†</sup> -D-Glucopyranoside            | AURKB    | 0.8571 |
| DH | Chrysophanol-8-O-1 <sup>†</sup> -D-Glucopyranoside            | CBR1     | 0.9    |
| DH | Chrysophanol-8-O-1 <sup>†</sup> -D-Glucopyranoside            | TOP2A    | 0.8085 |

|    |                                              |              |        |
|----|----------------------------------------------|--------------|--------|
| DH | Chrysophanol-8-O- $\beta$ -D-Glucopyranoside | TYR          | 0.8421 |
| DH | Chrysophanol-1-O- $\beta$ -D-Glucoside       | AHR          | 0.8571 |
| DH | Chrysophanol-1-O- $\beta$ -D-Glucoside       | AKR1C3       | 0.9    |
| DH | Chrysophanol-1-O- $\beta$ -D-Glucoside       | ALDH2        | 0.9    |
| DH | Chrysophanol-1-O- $\beta$ -D-Glucoside       | AR           | 0.9231 |
| DH | Chrysophanol-1-O- $\beta$ -D-Glucoside       | AURKB        | 0.8571 |
| DH | Chrysophanol-1-O- $\beta$ -D-Glucoside       | CBR1         | 0.9    |
| DH | Chrysophanol-1-O- $\beta$ -D-Glucoside       | TOP2A        | 0.8085 |
| DH | Chrysophanol-1-O- $\beta$ -D-Glucoside       | TYR          | 0.8421 |
| DH | 2-O-Cinnamoyl-Glucogallin                    | AKR1C3       | 0.8049 |
| DH | 2-O-Cinnamoyl-Glucogallin                    | ALDH2        | 0.85   |
| DH | 2-O-Cinnamoyl-Glucogallin                    | AR           | 0.8718 |
| DH | 2-O-Cinnamoyl-Glucogallin                    | CBR1         | 0.8049 |
| DH | 2-O-Cinnamoyl-Glucogallin                    | LCT          | 0.8056 |
| DH | 2-O-Cinnamoyl-Glucogallin                    | TYR          | 0.8889 |
| DH | 2-Cinnamoyl-Glucose                          | ABO          | 0.8108 |
| DH | 2-Cinnamoyl-Glucose                          | ALDH2        | 0.8205 |
| DH | 2-Cinnamoyl-Glucose                          | AMY1A        | 0.8485 |
| DH | 2-Cinnamoyl-Glucose                          | AMY2A        | 0.8485 |
| DH | 2-Cinnamoyl-Glucose                          | AMY2B        | 0.8571 |
| DH | 2-Cinnamoyl-Glucose                          | AR           | 0.8421 |
| DH | 2-Cinnamoyl-Glucose                          | BAMF RS28815 | 0.8485 |
| DH | 2-Cinnamoyl-Glucose                          | GCK          | 0.8485 |
| DH | 2-Cinnamoyl-Glucose                          | GLT6D1       | 0.8571 |
| DH | 2-Cinnamoyl-Glucose                          | GLTP         | 0.8571 |
| DH | 2-Cinnamoyl-Glucose                          | GNPDA1       | 0.8485 |
| DH | 2-Cinnamoyl-Glucose                          | HK1          | 0.8485 |
| DH | 2-Cinnamoyl-Glucose                          | IFNB1        | 0.8485 |
| DH | 2-Cinnamoyl-Glucose                          | KRTAP5-2     | 0.8485 |
| DH | 2-Cinnamoyl-Glucose                          | KRTAP5-3     | 0.8485 |
| DH | 2-Cinnamoyl-Glucose                          | LCT          | 0.8788 |
| DH | 2-Cinnamoyl-Glucose                          | LCTL         | 0.8485 |
| DH | 2-Cinnamoyl-Glucose                          | LGALS2       | 0.8485 |
| DH | 2-Cinnamoyl-Glucose                          | LGALS3       | 0.8571 |
| DH | 2-Cinnamoyl-Glucose                          | LGALS7       | 0.8485 |
| DH | 2-Cinnamoyl-Glucose                          | MB           | 0.8485 |
| DH | 2-Cinnamoyl-Glucose                          | MBL2         | 0.8286 |
| DH | 2-Cinnamoyl-Glucose                          | NCAN         | 0.8485 |
| DH | 2-Cinnamoyl-Glucose                          | NUDT9        | 0.8485 |
| DH | 2-Cinnamoyl-Glucose                          | PTGS1        | 0.8485 |
| DH | 2-Cinnamoyl-Glucose                          | PYGL         | 0.8485 |
| DH | 2-Cinnamoyl-Glucose                          | PYGM         | 0.8485 |
| DH | 2-Cinnamoyl-Glucose                          | SFTPD        | 0.8485 |
| DH | 2-Cinnamoyl-Glucose                          | SIGLEC1      | 0.8485 |
| DH | 2-Cinnamoyl-Glucose                          | SMARCA5      | 0.8485 |
| DH | 2-Cinnamoyl-Glucose                          | TM0024       | 0.8485 |

|    |                                   |        |        |
|----|-----------------------------------|--------|--------|
| DH | 2-Cinnamoyl-Glucose               | TYR    | 0.9118 |
| DH | 1,6-Digalloyl-2-Cinnamoyl-Glucose | AKR1C3 | 0.825  |
| DH | 1,6-Digalloyl-2-Cinnamoyl-Glucose | ALDH2  | 0.825  |
| DH | 1,6-Digalloyl-2-Cinnamoyl-Glucose | AR     | 0.8462 |
| DH | 1,6-Digalloyl-2-Cinnamoyl-Glucose | CBR1   | 0.825  |
| DH | 1,6-Digalloyl-2-Cinnamoyl-Glucose | TYR    | 0.8611 |
| DH | 1,6-Di-O-Galloyl-1'-Glucose       | AHR    | 0.8049 |
| DH | 1,6-Di-O-Galloyl-1'-Glucose       | AKR1C3 | 0.8462 |
| DH | 1,6-Di-O-Galloyl-1'-Glucose       | ALDH2  | 0.8462 |
| DH | 1,6-Di-O-Galloyl-1'-Glucose       | AR     | 0.8684 |
| DH | 1,6-Di-O-Galloyl-1'-Glucose       | AURKB  | 0.8049 |
| DH | 1,6-Di-O-Galloyl-1'-Glucose       | CBR1   | 0.8462 |
| DH | 1,6-Di-O-Galloyl-1'-Glucose       | LCT    | 0.8    |
| DH | 1,6-Di-O-Galloyl-1'-Glucose       | TYR    | 0.8857 |
| DH | Emodin-1-O-1'-D-Glucopyranoside   | AHR    | 0.8571 |
| DH | Emodin-1-O-1'-D-Glucopyranoside   | AKR1C3 | 0.9    |
| DH | Emodin-1-O-1'-D-Glucopyranoside   | ALDH2  | 0.9    |
| DH | Emodin-1-O-1'-D-Glucopyranoside   | AR     | 0.9231 |
| DH | Emodin-1-O-1'-D-Glucopyranoside   | AURKB  | 0.8571 |
| DH | Emodin-1-O-1'-D-Glucopyranoside   | CBR1   | 0.9    |
| DH | Emodin-1-O-1'-D-Glucopyranoside   | TOP2A  | 0.8085 |
| DH | Emodin-1-O-1'-D-Glucopyranoside   | TYR    | 0.8421 |
| DH | (X{2212})-Epicatechin-3-O-Gallate | ACTB   | 0.875  |
| DH | (X{2212})-Epicatechin-3-O-Gallate | AHR    | 1      |
| DH | (X{2212})-Epicatechin-3-O-Gallate | AKR1C3 | 0.8421 |
| DH | (X{2212})-Epicatechin-3-O-Gallate | AKT1   | 0.8125 |
| DH | (X{2212})-Epicatechin-3-O-Gallate | ALDH2  | 0.8421 |
| DH | (X{2212})-Epicatechin-3-O-Gallate | AR     | 0.8158 |
| DH | (X{2212})-Epicatechin-3-O-Gallate | ATP5A1 | 0.875  |
| DH | (X{2212})-Epicatechin-3-O-Gallate | ATP5B  | 0.875  |
| DH | (X{2212})-Epicatechin-3-O-Gallate | ATP5C1 | 0.875  |
| DH | (X{2212})-Epicatechin-3-O-Gallate | AURKB  | 0.8    |

|    |                                   |          |        |
|----|-----------------------------------|----------|--------|
| DH | (X{2212})-Epicatechin-3-O-Gallate | CBR1     | 0.875  |
| DH | (X{2212})-Epicatechin-3-O-Gallate | CDK6     | 0.8438 |
| DH | (X{2212})-Epicatechin-3-O-Gallate | CEBPB    | 0.875  |
| DH | (X{2212})-Epicatechin-3-O-Gallate | COMT     | 0.875  |
| DH | (X{2212})-Epicatechin-3-O-Gallate | CSNK2A1  | 0.875  |
| DH | (X{2212})-Epicatechin-3-O-Gallate | CSNK2B   | 0.875  |
| DH | (X{2212})-Epicatechin-3-O-Gallate | CYP1B1   | 0.875  |
| DH | (X{2212})-Epicatechin-3-O-Gallate | DHFRL1   | 1      |
| DH | (X{2212})-Epicatechin-3-O-Gallate | DNMT1    | 1      |
| DH | (X{2212})-Epicatechin-3-O-Gallate | EIF3F    | 0.875  |
| DH | (X{2212})-Epicatechin-3-O-Gallate | ESR1     | 0.875  |
| DH | (X{2212})-Epicatechin-3-O-Gallate | ESR2     | 0.875  |
| DH | (X{2212})-Epicatechin-3-O-Gallate | ESRRA    | 0.8125 |
| DH | (X{2212})-Epicatechin-3-O-Gallate | ESRRB    | 0.8125 |
| DH | (X{2212})-Epicatechin-3-O-Gallate | GABRA1   | 0.8    |
| DH | (X{2212})-Epicatechin-3-O-Gallate | GABRA2   | 0.8    |
| DH | (X{2212})-Epicatechin-3-O-Gallate | GABRA3   | 0.8    |
| DH | (X{2212})-Epicatechin-3-O-Gallate | GABRA4   | 0.8    |
| DH | (X{2212})-Epicatechin-3-O-Gallate | GABRA5   | 0.8    |
| DH | (X{2212})-Epicatechin-3-O-Gallate | GABRA6   | 0.8    |
| DH | (X{2212})-Epicatechin-3-O-Gallate | GABRG1   | 0.8    |
| DH | (X{2212})-Epicatechin-3-O-Gallate | GABRG2   | 0.8    |
| DH | (X{2212})-Epicatechin-3-O-Gallate | GABRG3   | 0.8    |
| DH | (X{2212})-Epicatechin-3-O-Gallate | GPB1     | 0.8125 |
| DH | (X{2212})-Epicatechin-3-O-Gallate | HCK      | 0.875  |
| DH | (X{2212})-Epicatechin-3-O-Gallate | HIBCH    | 0.875  |
| DH | (X{2212})-Epicatechin-3-O-Gallate | HSP90AA1 | 0.875  |

|    |                                         |        |        |
|----|-----------------------------------------|--------|--------|
| DH | (X{2212})-Epicatechin-3-O-Gallate       | HSPA2  | 0.875  |
| DH | (X{2212})-Epicatechin-3-O-Gallate       | IGHG1  | 0.8125 |
| DH | (X{2212})-Epicatechin-3-O-Gallate       | JAK1   | 0.875  |
| DH | (X{2212})-Epicatechin-3-O-Gallate       | MTTP   | 0.8286 |
| DH | (X{2212})-Epicatechin-3-O-Gallate       | NCOA1  | 0.8125 |
| DH | (X{2212})-Epicatechin-3-O-Gallate       | NCOA2  | 0.8125 |
| DH | (X{2212})-Epicatechin-3-O-Gallate       | NQO2   | 0.875  |
| DH | (X{2212})-Epicatechin-3-O-Gallate       | NR1I2  | 0.875  |
| DH | (X{2212})-Epicatechin-3-O-Gallate       | PIK3CG | 0.875  |
| DH | (X{2212})-Epicatechin-3-O-Gallate       | PIM1   | 0.875  |
| DH | (X{2212})-Epicatechin-3-O-Gallate       | PTK2B  | 0.8125 |
| DH | (X{2212})-Epicatechin-3-O-Gallate       | RUVBL2 | 0.875  |
| DH | (X{2212})-Epicatechin-3-O-Gallate       | SF3B3  | 0.875  |
| DH | (X{2212})-Epicatechin-3-O-Gallate       | SHBG   | 0.875  |
| DH | (X{2212})-Epicatechin-3-O-Gallate       | SOAT1  | 0.8286 |
| DH | (X{2212})-Epicatechin-3-O-Gallate       | SOAT2  | 0.8286 |
| DH | (X{2212})-Epicatechin-3-O-Gallate       | STK17B | 0.875  |
| DH | (X{2212})-Epicatechin-3-O-Gallate       | TOP2A  | 0.8125 |
| DH | (X{2212})-Epicatechin-3-O-Gallate       | UBA1   | 0.875  |
| DH | (X{2212})-Epicatechin-3-O-Gallate       | UGT3A1 | 0.875  |
| DH | Gallic Acid-3-O-(6'-O-Galloyl)Glucoside | AHR    | 0.8049 |
| DH | Gallic Acid-3-O-(6'-O-Galloyl)Glucoside | AKR1C3 | 0.8462 |
| DH | Gallic Acid-3-O-(6'-O-Galloyl)Glucoside | ALDH2  | 0.8462 |
| DH | Gallic Acid-3-O-(6'-O-Galloyl)Glucoside | AR     | 0.8684 |
| DH | Gallic Acid-3-O-(6'-O-Galloyl)Glucoside | AURKB  | 0.8049 |
| DH | Gallic Acid-3-O-(6'-O-Galloyl)Glucoside | CBR1   | 0.8462 |
| DH | Gallic Acid-3-O-(6'-O-Galloyl)Glucoside | LCT    | 0.8    |

|    |                                          |         |        |
|----|------------------------------------------|---------|--------|
| DH | Gallic Acid-3-O-(6'-O-Galloyl)Glucoside  | TYR     | 0.8857 |
| DH | Gallic Acid-4-O-(6'-O-Galloyl)-Glucoside | AHR     | 0.8049 |
| DH | Gallic Acid-4-O-(6'-O-Galloyl)-Glucoside | AKR1C3  | 0.8462 |
| DH | Gallic Acid-4-O-(6'-O-Galloyl)-Glucoside | ALDH2   | 0.8462 |
| DH | Gallic Acid-4-O-(6'-O-Galloyl)-Glucoside | AR      | 0.8684 |
| DH | Gallic Acid-4-O-(6'-O-Galloyl)-Glucoside | AURKB   | 0.8049 |
| DH | Gallic Acid-4-O-(6'-O-Galloyl)-Glucoside | CBR1    | 0.8462 |
| DH | Gallic Acid-4-O-(6'-O-Galloyl)-Glucoside | LCT     | 0.8    |
| DH | Gallic Acid-4-O-(6'-O-Galloyl)-Glucoside | TYR     | 0.8857 |
| DH | 6-O-Galloyl-Glucose                      | AHR     | 0.825  |
| DH | 6-O-Galloyl-Glucose                      | AKR1C3  | 0.8684 |
| DH | 6-O-Galloyl-Glucose                      | ALDH2   | 0.8684 |
| DH | 6-O-Galloyl-Glucose                      | AMY2B   | 0.8056 |
| DH | 6-O-Galloyl-Glucose                      | AR      | 0.8919 |
| DH | 6-O-Galloyl-Glucose                      | AURKB   | 0.825  |
| DH | 6-O-Galloyl-Glucose                      | CBR1    | 0.8684 |
| DH | 6-O-Galloyl-Glucose                      | DHFRL1  | 0.8056 |
| DH | 6-O-Galloyl-Glucose                      | DNMT1   | 0.8056 |
| DH | 6-O-Galloyl-Glucose                      | GLT6D1  | 0.8056 |
| DH | 6-O-Galloyl-Glucose                      | GLTP    | 0.8056 |
| DH | 6-O-Galloyl-Glucose                      | LCT     | 0.8235 |
| DH | 6-O-Galloyl-Glucose                      | LGALS3  | 0.8056 |
| DH | 6-O-Galloyl-Glucose                      | TYR     | 0.9118 |
| DH | Isolindleyin                             | TYR     | 0.8    |
| DH | Palmidin C                               | AHR     | 0.92   |
| DH | Palmidin C                               | ALOX5   | 0.8148 |
| DH | Palmidin C                               | BCL2L1  | 0.8    |
| DH | Palmidin C                               | CSNK2A1 | 0.92   |
| DH | Palmidin C                               | CYP1A2  | 0.8148 |
| DH | Palmidin C                               | CYP2C9  | 0.8148 |
| DH | Palmidin C                               | CYP2D6  | 0.8148 |
| DH | Palmidin C                               | CYP2E1  | 0.8148 |
| DH | Palmidin C                               | CYP3A4  | 0.8148 |
| DH | Palmidin C                               | CYP3A43 | 0.8148 |
| DH | Palmidin C                               | CYP3A5  | 0.8148 |
| DH | Palmidin C                               | CYP3A7  | 0.8148 |
| DH | Palmidin C                               | GSTA1   | 0.96   |
| DH | Palmidin C                               | GSTP1   | 0.96   |
| DH | Palmidin C                               | NR1H2   | 0.8148 |
| DH | Palmidin C                               | NR1H3   | 0.8148 |
| DH | Physcion-8-O- $\beta$ -D-Gentiobioside   | ABO     | 0.8095 |
| DH | Physcion-8-O- $\beta$ -D-Gentiobioside   | AHR     | 0.907  |
| DH | Physcion-8-O- $\beta$ -D-Gentiobioside   | AKR1C3  | 0.8605 |

|    |                                             |              |        |
|----|---------------------------------------------|--------------|--------|
| DH | Physcion-8-O- $\hat{I}$ '-D-Gentiobioside   | ALDH2        | 0.8605 |
| DH | Physcion-8-O- $\hat{I}$ '-D-Gentiobioside   | AR           | 0.881  |
| DH | Physcion-8-O- $\hat{I}$ '-D-Gentiobioside   | AURKB        | 0.907  |
| DH | Physcion-8-O- $\hat{I}$ '-D-Gentiobioside   | CBR1         | 0.8605 |
| DH | Physcion-8-O- $\hat{I}$ '-D-Glucopyranoside | AHR          | 0.9048 |
| DH | Physcion-8-O- $\hat{I}$ '-D-Glucopyranoside | AKR1C3       | 0.8571 |
| DH | Physcion-8-O- $\hat{I}$ '-D-Glucopyranoside | ALDH2        | 0.8571 |
| DH | Physcion-8-O- $\hat{I}$ '-D-Glucopyranoside | AR           | 0.878  |
| DH | Physcion-8-O- $\hat{I}$ '-D-Glucopyranoside | AURKB        | 0.9048 |
| DH | Physcion-8-O- $\hat{I}$ '-D-Glucopyranoside | CBR1         | 0.8571 |
| DH | Physcion-8-O- $\hat{I}$ '-D-Glucopyranoside | TYR          | 0.8    |
| DH | Piceid                                      | ABO          | 0.8108 |
| DH | Piceid                                      | ALDH2        | 0.8205 |
| DH | Piceid                                      | AMY1A        | 0.8485 |
| DH | Piceid                                      | AMY2A        | 0.8485 |
| DH | Piceid                                      | AMY2B        | 0.8571 |
| DH | Piceid                                      | AR           | 0.8421 |
| DH | Piceid                                      | BAMF RS28815 | 0.8485 |
| DH | Piceid                                      | GCK          | 0.8485 |
| DH | Piceid                                      | GLT6D1       | 0.8571 |
| DH | Piceid                                      | GLTP         | 0.8571 |
| DH | Piceid                                      | GNPDA1       | 0.8485 |
| DH | Piceid                                      | HK1          | 0.8485 |
| DH | Piceid                                      | IFNB1        | 0.8485 |
| DH | Piceid                                      | KRTAP5-2     | 0.8485 |
| DH | Piceid                                      | KRTAP5-3     | 0.8485 |
| DH | Piceid                                      | LCT          | 0.8235 |
| DH | Piceid                                      | LCTL         | 0.8485 |
| DH | Piceid                                      | LGALS2       | 0.8485 |
| DH | Piceid                                      | LGALS3       | 0.8571 |
| DH | Piceid                                      | LGALS7       | 0.8485 |
| DH | Piceid                                      | MB           | 0.8485 |
| DH | Piceid                                      | MBL2         | 0.8286 |
| DH | Piceid                                      | NCAN         | 0.8485 |
| DH | Piceid                                      | NUDT9        | 0.8485 |
| DH | Piceid                                      | PTGS1        | 0.8485 |
| DH | Piceid                                      | PYGL         | 0.8485 |
| DH | Piceid                                      | PYGM         | 0.8485 |
| DH | Piceid                                      | SFTPD        | 0.8485 |
| DH | Piceid                                      | SIGLEC1      | 0.8485 |
| DH | Piceid                                      | SMARCA5      | 0.8485 |
| DH | Piceid                                      | TM0024       | 0.8485 |
| DH | Piceid                                      | TYR          | 0.9697 |
| DH | Procyanidin B1 3'-O-Gallate                 | ACTB         | 0.8235 |

|    |                                  |          |        |
|----|----------------------------------|----------|--------|
| DH | Procyanidin B1 3'-O-Gallate      | AHR      | 0.9412 |
| DH | Procyanidin B1 3'-O-Gallate      | AKR1C3   | 0.8462 |
| DH | Procyanidin B1 3'-O-Gallate      | ALDH2    | 0.8462 |
| DH | Procyanidin B1 3'-O-Gallate      | AR       | 0.8205 |
| DH | Procyanidin B1 3'-O-Gallate      | ATP5A1   | 0.8235 |
| DH | Procyanidin B1 3'-O-Gallate      | ATP5B    | 0.8235 |
| DH | Procyanidin B1 3'-O-Gallate      | ATP5C1   | 0.8235 |
| DH | Procyanidin B1 3'-O-Gallate      | AURKB    | 0.8049 |
| DH | Procyanidin B1 3'-O-Gallate      | CA1      | 0.8    |
| DH | Procyanidin B1 3'-O-Gallate      | CA12     | 0.8    |
| DH | Procyanidin B1 3'-O-Gallate      | CA14     | 0.8    |
| DH | Procyanidin B1 3'-O-Gallate      | CA2      | 0.8    |
| DH | Procyanidin B1 3'-O-Gallate      | CA3      | 0.8    |
| DH | Procyanidin B1 3'-O-Gallate      | CA4      | 0.8    |
| DH | Procyanidin B1 3'-O-Gallate      | CA5A     | 0.8    |
| DH | Procyanidin B1 3'-O-Gallate      | CA5B     | 0.8    |
| DH | Procyanidin B1 3'-O-Gallate      | CA6      | 0.8    |
| DH | Procyanidin B1 3'-O-Gallate      | CA7      | 0.8    |
| DH | Procyanidin B1 3'-O-Gallate      | CA9      | 0.8    |
| DH | Procyanidin B1 3'-O-Gallate      | CBR1     | 0.8462 |
| DH | Procyanidin B1 3'-O-Gallate      | CEBPB    | 0.8235 |
| DH | Procyanidin B1 3'-O-Gallate      | COMT     | 0.8235 |
| DH | Procyanidin B1 3'-O-Gallate      | CSNK2A1  | 0.8235 |
| DH | Procyanidin B1 3'-O-Gallate      | CSNK2B   | 0.8235 |
| DH | Procyanidin B1 3'-O-Gallate      | CYP1B1   | 0.8235 |
| DH | Procyanidin B1 3'-O-Gallate      | DHFRL1   | 0.9412 |
| DH | Procyanidin B1 3'-O-Gallate      | DNMT1    | 0.9412 |
| DH | Procyanidin B1 3'-O-Gallate      | EIF3F    | 0.8235 |
| DH | Procyanidin B1 3'-O-Gallate      | ESR1     | 0.8235 |
| DH | Procyanidin B1 3'-O-Gallate      | ESR2     | 0.8235 |
| DH | Procyanidin B1 3'-O-Gallate      | HCK      | 0.8235 |
| DH | Procyanidin B1 3'-O-Gallate      | HIBCH    | 0.8235 |
| DH | Procyanidin B1 3'-O-Gallate      | HSP90AA1 | 0.8235 |
| DH | Procyanidin B1 3'-O-Gallate      | HSPA2    | 0.8235 |
| DH | Procyanidin B1 3'-O-Gallate      | JAK1     | 0.8235 |
| DH | Procyanidin B1 3'-O-Gallate      | NQO2     | 0.8235 |
| DH | Procyanidin B1 3'-O-Gallate      | NR1I2    | 0.8235 |
| DH | Procyanidin B1 3'-O-Gallate      | PIK3CG   | 0.8235 |
| DH | Procyanidin B1 3'-O-Gallate      | PIM1     | 0.8235 |
| DH | Procyanidin B1 3'-O-Gallate      | PRKACA   | 0.8    |
| DH | Procyanidin B1 3'-O-Gallate      | PRKCA    | 0.8    |
| DH | Procyanidin B1 3'-O-Gallate      | PRKCB    | 0.8    |
| DH | Procyanidin B1 3'-O-Gallate      | RUVBL2   | 0.8235 |
| DH | Procyanidin B1 3'-O-Gallate      | SF3B3    | 0.8235 |
| DH | Procyanidin B1 3'-O-Gallate      | SHBG     | 0.8235 |
| DH | Procyanidin B1 3'-O-Gallate      | SQLE     | 0.8    |
| DH | Procyanidin B1 3'-O-Gallate      | STK17B   | 0.8235 |
| DH | Procyanidin B1 3'-O-Gallate      | SYK      | 0.8    |
| DH | Procyanidin B1 3'-O-Gallate      | UBA1     | 0.8235 |
| DH | Procyanidin B1 3'-O-Gallate      | UGT3A1   | 0.8235 |
| DH | Procyanidin B2 3,3'-Di-O-Gallate | ACTB     | 0.8235 |
| DH | Procyanidin B2 3,3'-Di-O-Gallate | AHR      | 0.9412 |



|    |                                  |         |        |
|----|----------------------------------|---------|--------|
| DH | Procyanidin B2 3,3'-Di-O-Gallate | AKR1C3  | 0.8462 |
| DH | Procyanidin B2 3,3'-Di-O-Gallate | ALDH2   | 0.8462 |
| DH | Procyanidin B2 3,3'-Di-O-Gallate | AR      | 0.8205 |
| DH | Procyanidin B2 3,3'-Di-O-Gallate | ATP5A1  | 0.8235 |
| DH | Procyanidin B2 3,3'-Di-O-Gallate | ATP5B   | 0.8235 |
| DH | Procyanidin B2 3,3'-Di-O-Gallate | ATP5C1  | 0.8235 |
| DH | Procyanidin B2 3,3'-Di-O-Gallate | AURKB   | 0.8049 |
| DH | Procyanidin B2 3,3'-Di-O-Gallate | CA1     | 0.8529 |
| DH | Procyanidin B2 3,3'-Di-O-Gallate | CA12    | 0.8529 |
| DH | Procyanidin B2 3,3'-Di-O-Gallate | CA14    | 0.8529 |
| DH | Procyanidin B2 3,3'-Di-O-Gallate | CA2     | 0.8529 |
| DH | Procyanidin B2 3,3'-Di-O-Gallate | CA3     | 0.8529 |
| DH | Procyanidin B2 3,3'-Di-O-Gallate | CA4     | 0.8529 |
| DH | Procyanidin B2 3,3'-Di-O-Gallate | CA5A    | 0.8529 |
| DH | Procyanidin B2 3,3'-Di-O-Gallate | CA5B    | 0.8529 |
| DH | Procyanidin B2 3,3'-Di-O-Gallate | CA6     | 0.8529 |
| DH | Procyanidin B2 3,3'-Di-O-Gallate | CA7     | 0.8529 |
| DH | Procyanidin B2 3,3'-Di-O-Gallate | CA9     | 0.8529 |
| DH | Procyanidin B2 3,3'-Di-O-Gallate | CBR1    | 0.8462 |
| DH | Procyanidin B2 3,3'-Di-O-Gallate | CEBPB   | 0.8235 |
| DH | Procyanidin B2 3,3'-Di-O-Gallate | COMT    | 0.8235 |
| DH | Procyanidin B2 3,3'-Di-O-Gallate | CRYZ    | 0.8    |
| DH | Procyanidin B2 3,3'-Di-O-Gallate | CSNK2A1 | 0.8529 |
| DH | Procyanidin B2 3,3'-Di-O-Gallate | CSNK2B  | 0.8235 |
| DH | Procyanidin B2 3,3'-Di-O-Gallate | CYP1B1  | 0.8235 |
| DH | Procyanidin B2 3,3'-Di-O-Gallate | DHFRL1  | 0.9412 |
| DH | Procyanidin B2 3,3'-Di-O-Gallate | DNMT1   | 0.9412 |

|    |                                                             |          |        |
|----|-------------------------------------------------------------|----------|--------|
| DH | Procyanidin B2 3,3'-Di-O-Gallate                            | EIF3F    | 0.8235 |
| DH | Procyanidin B2 3,3'-Di-O-Gallate                            | ESR1     | 0.8235 |
| DH | Procyanidin B2 3,3'-Di-O-Gallate                            | ESR2     | 0.8235 |
| DH | Procyanidin B2 3,3'-Di-O-Gallate                            | HCK      | 0.8235 |
| DH | Procyanidin B2 3,3'-Di-O-Gallate                            | HIBCH    | 0.8235 |
| DH | Procyanidin B2 3,3'-Di-O-Gallate                            | HSP90AA1 | 0.8235 |
| DH | Procyanidin B2 3,3'-Di-O-Gallate                            | HSPA2    | 0.8235 |
| DH | Procyanidin B2 3,3'-Di-O-Gallate                            | JAK1     | 0.8235 |
| DH | Procyanidin B2 3,3'-Di-O-Gallate                            | NQO1     | 0.8    |
| DH | Procyanidin B2 3,3'-Di-O-Gallate                            | NQO2     | 0.8235 |
| DH | Procyanidin B2 3,3'-Di-O-Gallate                            | NR1I2    | 0.8235 |
| DH | Procyanidin B2 3,3'-Di-O-Gallate                            | PIK3CG   | 0.8235 |
| DH | Procyanidin B2 3,3'-Di-O-Gallate                            | PIM1     | 0.8235 |
| DH | Procyanidin B2 3,3'-Di-O-Gallate                            | PRKACA   | 0.8529 |
| DH | Procyanidin B2 3,3'-Di-O-Gallate                            | PRKCA    | 0.8529 |
| DH | Procyanidin B2 3,3'-Di-O-Gallate                            | PRKCB    | 0.8529 |
| DH | Procyanidin B2 3,3'-Di-O-Gallate                            | RUVBL2   | 0.8235 |
| DH | Procyanidin B2 3,3'-Di-O-Gallate                            | SF3B3    | 0.8235 |
| DH | Procyanidin B2 3,3'-Di-O-Gallate                            | SHBG     | 0.8235 |
| DH | Procyanidin B2 3,3'-Di-O-Gallate                            | SQLE     | 0.8529 |
| DH | Procyanidin B2 3,3'-Di-O-Gallate                            | STK17B   | 0.8235 |
| DH | Procyanidin B2 3,3'-Di-O-Gallate                            | SYK      | 0.8529 |
| DH | Procyanidin B2 3,3'-Di-O-Gallate                            | UBA1     | 0.8235 |
| DH | Procyanidin B2 3,3'-Di-O-Gallate                            | UGT3A1   | 0.8235 |
| DH | Procyanidin B2 3,3'-Di-O-Gallate                            | VKORC1   | 0.8    |
| DH | Resveratrol-4'-O-(6"-O-Galloyl)- $\beta$ -D-Glucopyranoside | AHR      | 0.8049 |
| DH | Resveratrol-4'-O-(6"-O-Galloyl)- $\beta$ -D-Glucopyranoside | AKR1C3   | 0.8462 |

|    |                                                       |              |        |
|----|-------------------------------------------------------|--------------|--------|
| DH | Resveratrol-4'-O-(6''-O-Galloyl)-Î'-D-Glucopyranoside | ALDH2        | 0.8462 |
| DH | Resveratrol-4'-O-(6''-O-Galloyl)-Î'-D-Glucopyranoside | AR           | 0.8684 |
| DH | Resveratrol-4'-O-(6''-O-Galloyl)-Î'-D-Glucopyranoside | AURKB        | 0.8049 |
| DH | Resveratrol-4'-O-(6''-O-Galloyl)-Î'-D-Glucopyranoside | CBR1         | 0.8462 |
| DH | Resveratrol-4'-O-(6''-O-Galloyl)-Î'-D-Glucopyranoside | LCT          | 0.8    |
| DH | Resveratrol-4'-O-(6''-O-Galloyl)-Î'-D-Glucopyranoside | TYR          | 0.8857 |
| DH | Resveratrol-4'-O-Î'-D-Glucoside                       | ABO          | 0.8108 |
| DH | Resveratrol-4'-O-Î'-D-Glucoside                       | ALDH2        | 0.8205 |
| DH | Resveratrol-4'-O-Î'-D-Glucoside                       | AMY1A        | 0.8485 |
| DH | Resveratrol-4'-O-Î'-D-Glucoside                       | AMY2A        | 0.8485 |
| DH | Resveratrol-4'-O-Î'-D-Glucoside                       | AMY2B        | 0.8571 |
| DH | Resveratrol-4'-O-Î'-D-Glucoside                       | AR           | 0.8421 |
| DH | Resveratrol-4'-O-Î'-D-Glucoside                       | BAMF_RS28815 | 0.8485 |
| DH | Resveratrol-4'-O-Î'-D-Glucoside                       | GCK          | 0.8485 |
| DH | Resveratrol-4'-O-Î'-D-Glucoside                       | GLT6D1       | 0.8571 |
| DH | Resveratrol-4'-O-Î'-D-Glucoside                       | GLTP         | 0.8571 |
| DH | Resveratrol-4'-O-Î'-D-Glucoside                       | GNPDA1       | 0.8485 |
| DH | Resveratrol-4'-O-Î'-D-Glucoside                       | HK1          | 0.8485 |
| DH | Resveratrol-4'-O-Î'-D-Glucoside                       | IFNB1        | 0.8485 |
| DH | Resveratrol-4'-O-Î'-D-Glucoside                       | KRTAP5-2     | 0.8485 |
| DH | Resveratrol-4'-O-Î'-D-Glucoside                       | KRTAP5-3     | 0.8485 |
| DH | Resveratrol-4'-O-Î'-D-Glucoside                       | LCT          | 0.8235 |
| DH | Resveratrol-4'-O-Î'-D-Glucoside                       | LCTL         | 0.8485 |
| DH | Resveratrol-4'-O-Î'-D-Glucoside                       | LGALS2       | 0.8485 |
| DH | Resveratrol-4'-O-Î'-D-Glucoside                       | LGALS3       | 0.8571 |
| DH | Resveratrol-4'-O-Î'-D-Glucoside                       | LGALS7       | 0.8485 |
| DH | Resveratrol-4'-O-Î'-D-Glucoside                       | MB           | 0.8485 |

|    |                                        |         |        |
|----|----------------------------------------|---------|--------|
| DH | Resveratrol-4'-O- $\beta$ -D-Glucoside | MBL2    | 0.8286 |
| DH | Resveratrol-4'-O- $\beta$ -D-Glucoside | NCAN    | 0.8485 |
| DH | Resveratrol-4'-O- $\beta$ -D-Glucoside | NUDT9   | 0.8485 |
| DH | Resveratrol-4'-O- $\beta$ -D-Glucoside | PTGS1   | 0.8485 |
| DH | Resveratrol-4'-O- $\beta$ -D-Glucoside | PYGL    | 0.8485 |
| DH | Resveratrol-4'-O- $\beta$ -D-Glucoside | PYGM    | 0.8485 |
| DH | Resveratrol-4'-O- $\beta$ -D-Glucoside | SFTPD   | 0.8485 |
| DH | Resveratrol-4'-O- $\beta$ -D-Glucoside | SIGLEC1 | 0.8485 |
| DH | Resveratrol-4'-O- $\beta$ -D-Glucoside | SMARCA5 | 0.8485 |
| DH | Resveratrol-4'-O- $\beta$ -D-Glucoside | TM0024  | 0.8485 |
| DH | Resveratrol-4'-O- $\beta$ -D-Glucoside | TYR     | 0.9697 |
| DH | Rhein A                                | AHR     | 0.92   |
| DH | Rhein A                                | ALOX5   | 0.88   |
| DH | Rhein A                                | CSNK2A1 | 0.92   |
| DH | Rhein A                                | CYP1A2  | 0.8148 |
| DH | Rhein A                                | CYP2C9  | 0.8148 |
| DH | Rhein A                                | CYP2D6  | 0.8148 |
| DH | Rhein A                                | CYP2E1  | 0.8148 |
| DH | Rhein A                                | CYP3A4  | 0.8148 |
| DH | Rhein A                                | CYP3A43 | 0.8148 |
| DH | Rhein A                                | CYP3A5  | 0.8148 |
| DH | Rhein A                                | CYP3A7  | 0.8148 |
| DH | Rhein A                                | GSTA1   | 0.8846 |
| DH | Rhein A                                | GSTP1   | 0.8846 |
| DH | Rhein A                                | NR1H2   | 0.88   |
| DH | Rhein A                                | NR1H3   | 0.88   |
| DH | Rhein B                                | AHR     | 0.88   |
| DH | Rhein B                                | ALOX5   | 0.9167 |
| DH | Rhein B                                | CSNK2A1 | 0.88   |
| DH | Rhein B                                | CYP1A2  | 0.8462 |
| DH | Rhein B                                | CYP2C9  | 0.8462 |
| DH | Rhein B                                | CYP2D6  | 0.8462 |
| DH | Rhein B                                | CYP2E1  | 0.8462 |
| DH | Rhein B                                | CYP3A4  | 0.8462 |
| DH | Rhein B                                | CYP3A43 | 0.8462 |
| DH | Rhein B                                | CYP3A5  | 0.8462 |
| DH | Rhein B                                | CYP3A7  | 0.8462 |
| DH | Rhein B                                | GSTA1   | 0.8462 |
| DH | Rhein B                                | GSTP1   | 0.8462 |
| DH | Rhein B                                | NR1H2   | 0.9167 |
| DH | Rhein B                                | NR1H3   | 0.9167 |
| DH | Rhein C                                | ALOX5   | 0.8889 |
| DH | Rhein C                                | CYP1A2  | 0.8889 |
| DH | Rhein C                                | CYP2C9  | 0.8889 |

|    |                                |          |        |
|----|--------------------------------|----------|--------|
| DH | Rheidin C                      | CYP2D6   | 0.8889 |
| DH | Rheidin C                      | CYP2E1   | 0.8889 |
| DH | Rheidin C                      | CYP3A4   | 0.8889 |
| DH | Rheidin C                      | CYP3A43  | 0.8889 |
| DH | Rheidin C                      | CYP3A5   | 0.8889 |
| DH | Rheidin C                      | CYP3A7   | 0.8889 |
| DH | Rheidin C                      | GSTA1    | 0.8214 |
| DH | Rheidin C                      | GSTP1    | 0.8214 |
| DH | Rheidin C                      | NR1H2    | 0.8889 |
| DH | Rheidin C                      | NR1H3    | 0.8889 |
| DH | Rhein                          | AHR      | 0.875  |
| DH | Rhein                          | ALOX5    | 1      |
| DH | Rhein                          | CSNK2A1  | 0.875  |
| DH | Rhein                          | CYP1A2   | 0.84   |
| DH | Rhein                          | CYP2C9   | 0.84   |
| DH | Rhein                          | CYP2D6   | 0.84   |
| DH | Rhein                          | CYP2E1   | 0.84   |
| DH | Rhein                          | CYP3A4   | 0.84   |
| DH | Rhein                          | CYP3A43  | 0.84   |
| DH | Rhein                          | CYP3A5   | 0.84   |
| DH | Rhein                          | CYP3A7   | 0.84   |
| DH | Rhein                          | GSTA1    | 0.84   |
| DH | Rhein                          | GSTP1    | 0.84   |
| DH | Rhein                          | KRT12    | 0.8261 |
| DH | Rhein                          | KRT2     | 0.8261 |
| DH | Rhein                          | MAPK8IP1 | 0.8261 |
| DH | Rhein                          | NR1H2    | 1      |
| DH | Rhein                          | NR1H3    | 1      |
| DH | Rhein                          | PTGS1    | 0.8333 |
| DH | Rhein                          | PTGS2    | 0.8333 |
| DH | Rhein                          | SCO5081  | 0.8148 |
| DH | Rhein-8-O-Î'-D-Glucopyranoside | AHR      | 0.8333 |
| DH | Rhein-8-O-Î'-D-Glucopyranoside | AKR1C3   | 0.875  |
| DH | Rhein-8-O-Î'-D-Glucopyranoside | ALDH2    | 0.9231 |
| DH | Rhein-8-O-Î'-D-Glucopyranoside | AR       | 0.9474 |
| DH | Rhein-8-O-Î'-D-Glucopyranoside | AURKB    | 0.8333 |
| DH | Rhein-8-O-Î'-D-Glucopyranoside | CBR1     | 0.875  |
| DH | Rhein-8-O-Î'-D-Glucopyranoside | DHFRL1   | 0.8158 |
| DH | Rhein-8-O-Î'-D-Glucopyranoside | DNMT1    | 0.8158 |
| DH | Rhein-8-O-Î'-D-Glucopyranoside | TYR      | 0.8649 |
| DH | Rheinoside A                   | AHR      | 0.8222 |
| DH | Rheinoside A                   | AKR1C3   | 0.8605 |
| DH | Rheinoside A                   | ALDH2    | 0.9048 |
| DH | Rheinoside A                   | AR       | 0.881  |
| DH | Rheinoside A                   | AURKB    | 0.8222 |
| DH | Rheinoside A                   | CBR1     | 0.8605 |

|    |                                                 |         |        |
|----|-------------------------------------------------|---------|--------|
| DH | Rheinoside B                                    | AHR     | 0.8222 |
| DH | Rheinoside B                                    | AKR1C3  | 0.8605 |
| DH | Rheinoside B                                    | ALDH2   | 0.9048 |
| DH | Rheinoside B                                    | AR      | 0.881  |
| DH | Rheinoside B                                    | AURKB   | 0.8222 |
| DH | Rheinoside B                                    | CBR1    | 0.8605 |
| DH | Rheinoside C                                    | AHR     | 0.8605 |
| DH | Rheinoside C                                    | AKR1C3  | 0.9024 |
| DH | Rheinoside C                                    | ALDH2   | 0.95   |
| DH | Rheinoside C                                    | AMY2B   | 0.8    |
| DH | Rheinoside C                                    | AR      | 0.925  |
| DH | Rheinoside C                                    | AURKB   | 0.8605 |
| DH | Rheinoside C                                    | CBR1    | 0.9024 |
| DH | Rheinoside C                                    | DHFRL1  | 0.8    |
| DH | Rheinoside C                                    | DNMT1   | 0.8    |
| DH | Rheinoside C                                    | GLT6D1  | 0.8    |
| DH | Rheinoside C                                    | GLTP    | 0.8    |
| DH | Rheinoside C                                    | LGALS3  | 0.8    |
| DH | Rheinoside C                                    | TYR     | 0.8    |
| DH | Rheinoside D                                    | AHR     | 0.8605 |
| DH | Rheinoside D                                    | AKR1C3  | 0.9024 |
| DH | Rheinoside D                                    | ALDH2   | 0.95   |
| DH | Rheinoside D                                    | AMY2B   | 0.8    |
| DH | Rheinoside D                                    | AR      | 0.925  |
| DH | Rheinoside D                                    | AURKB   | 0.8605 |
| DH | Rheinoside D                                    | CBR1    | 0.9024 |
| DH | Rheinoside D                                    | DHFRL1  | 0.8    |
| DH | Rheinoside D                                    | DNMT1   | 0.8    |
| DH | Rheinoside D                                    | GLT6D1  | 0.8    |
| DH | Rheinoside D                                    | GLTP    | 0.8    |
| DH | Rheinoside D                                    | LGALS3  | 0.8    |
| DH | Rheinoside D                                    | TYR     | 0.8    |
| DH | Rhein-8-O-Î'-D-(6'-Oxalyl)-<br>Glucopyra-Noside | AHR     | 0.8537 |
| DH | Rhein-8-O-Î'-D-(6'-Oxalyl)-<br>Glucopyra-Noside | AKR1C3  | 0.8974 |
| DH | Rhein-8-O-Î'-D-(6'-Oxalyl)-<br>Glucopyra-Noside | ALDH2   | 0.8974 |
| DH | Rhein-8-O-Î'-D-(6'-Oxalyl)-<br>Glucopyra-Noside | AR      | 0.9211 |
| DH | Rhein-8-O-Î'-D-(6'-Oxalyl)-<br>Glucopyra-Noside | AURKB   | 0.8537 |
| DH | Rhein-8-O-Î'-D-(6'-Oxalyl)-<br>Glucopyra-Noside | CBR1    | 0.8974 |
| DH | Rhein-8-O-Î'-D-(6'-Oxalyl)-<br>Glucopyra-Noside | DHFRL1  | 0.8378 |
| DH | Rhein-8-O-Î'-D-(6'-Oxalyl)-<br>Glucopyra-Noside | DNMT1   | 0.8378 |
| DH | Rhein-8-O-Î'-D-(6'-Oxalyl)-<br>Glucopyra-Noside | TYR     | 0.8378 |
| DH | Sennidin A                                      | AHR     | 0.84   |
| DH | Sennidin A                                      | ALOX5   | 0.9565 |
| DH | Sennidin A                                      | CSNK2A1 | 0.84   |
| DH | Sennidin A                                      | CYP1A2  | 0.8077 |
| DH | Sennidin A                                      | CYP2C9  | 0.8077 |

|    |                                            |              |        |
|----|--------------------------------------------|--------------|--------|
| DH | Sennidin A                                 | CYP2D6       | 0.8077 |
| DH | Sennidin A                                 | CYP2E1       | 0.8077 |
| DH | Sennidin A                                 | CYP3A4       | 0.8077 |
| DH | Sennidin A                                 | CYP3A43      | 0.8077 |
| DH | Sennidin A                                 | CYP3A5       | 0.8077 |
| DH | Sennidin A                                 | CYP3A7       | 0.8077 |
| DH | Sennidin A                                 | GSTA1        | 0.8077 |
| DH | Sennidin A                                 | GSTP1        | 0.8077 |
| DH | Sennidin A                                 | IGHG1        | 0.8148 |
| DH | Sennidin A                                 | NR1H2        | 0.9565 |
| DH | Sennidin A                                 | NR1H3        | 0.9565 |
| DH | Sennidin A                                 | PTGS1        | 0.8    |
| DH | Sennidin A                                 | PTGS2        | 0.8    |
| DH | Sennoside A                                | AHR          | 0.8605 |
| DH | Sennoside A                                | AKR1C3       | 0.9024 |
| DH | Sennoside A                                | ALDH2        | 0.95   |
| DH | Sennoside A                                | AMY2B        | 0.8    |
| DH | Sennoside A                                | AR           | 0.925  |
| DH | Sennoside A                                | AURKB        | 0.8605 |
| DH | Sennoside A                                | CBR1         | 0.9024 |
| DH | Sennoside A                                | DHFRL1       | 0.8    |
| DH | Sennoside A                                | DNMT1        | 0.8    |
| DH | Sennoside A                                | GLT6D1       | 0.8    |
| DH | Sennoside A                                | GLTP         | 0.8    |
| DH | Sennoside A                                | LGALS3       | 0.8    |
| DH | Sennoside A                                | TYR          | 0.8    |
| DH | Sennoside C                                | AHR          | 0.8605 |
| DH | Sennoside C                                | AKR1C3       | 0.9024 |
| DH | Sennoside C                                | ALDH2        | 0.95   |
| DH | Sennoside C                                | AMY2B        | 0.8    |
| DH | Sennoside C                                | AR           | 0.925  |
| DH | Sennoside C                                | AURKB        | 0.8605 |
| DH | Sennoside C                                | CBR1         | 0.9024 |
| DH | Sennoside C                                | DHFRL1       | 0.8    |
| DH | Sennoside C                                | DNMT1        | 0.8    |
| DH | Sennoside C                                | GLT6D1       | 0.8    |
| DH | Sennoside C                                | GLTP         | 0.8    |
| DH | Sennoside C                                | LGALS3       | 0.8    |
| DH | Sennoside C                                | TYR          | 0.8    |
| DH | 3,4,3',5'-Tetrahydroxystilbene-3-Glucoside | AKR1C3       | 0.8    |
| DH | 3,4,3',5'-Tetrahydroxystilbene-3-Glucoside | ALDH2        | 0.8462 |
| DH | 3,4,3',5'-Tetrahydroxystilbene-3-Glucoside | AMY1A        | 0.8235 |
| DH | 3,4,3',5'-Tetrahydroxystilbene-3-Glucoside | AMY2A        | 0.8235 |
| DH | 3,4,3',5'-Tetrahydroxystilbene-3-Glucoside | AMY2B        | 0.8333 |
| DH | 3,4,3',5'-Tetrahydroxystilbene-3-Glucoside | AR           | 0.8684 |
| DH | 3,4,3',5'-Tetrahydroxystilbene-3-Glucoside | BAMF_RS28815 | 0.8235 |
| DH | 3,4,3',5'-Tetrahydroxystilbene-3-Glucoside | CBR1         | 0.8    |

|    |                                            |          |        |
|----|--------------------------------------------|----------|--------|
| DH | 3,4,3',5'-Tetrahydroxystilbene-3-Glucoside | GCK      | 0.8235 |
| DH | 3,4,3',5'-Tetrahydroxystilbene-3-Glucoside | GLT6D1   | 0.8333 |
| DH | 3,4,3',5'-Tetrahydroxystilbene-3-Glucoside | GLTP     | 0.8333 |
| DH | 3,4,3',5'-Tetrahydroxystilbene-3-Glucoside | GNPDA1   | 0.8235 |
| DH | 3,4,3',5'-Tetrahydroxystilbene-3-Glucoside | HK1      | 0.8235 |
| DH | 3,4,3',5'-Tetrahydroxystilbene-3-Glucoside | IFNB1    | 0.8235 |
| DH | 3,4,3',5'-Tetrahydroxystilbene-3-Glucoside | KRTAP5-2 | 0.8235 |
| DH | 3,4,3',5'-Tetrahydroxystilbene-3-Glucoside | KRTAP5-3 | 0.8235 |
| DH | 3,4,3',5'-Tetrahydroxystilbene-3-Glucoside | LCT      | 0.8    |
| DH | 3,4,3',5'-Tetrahydroxystilbene-3-Glucoside | LCTL     | 0.8235 |
| DH | 3,4,3',5'-Tetrahydroxystilbene-3-Glucoside | LGALS2   | 0.8235 |
| DH | 3,4,3',5'-Tetrahydroxystilbene-3-Glucoside | LGALS3   | 0.8333 |
| DH | 3,4,3',5'-Tetrahydroxystilbene-3-Glucoside | LGALS7   | 0.8235 |
| DH | 3,4,3',5'-Tetrahydroxystilbene-3-Glucoside | MB       | 0.8235 |
| DH | 3,4,3',5'-Tetrahydroxystilbene-3-Glucoside | MBL2     | 0.8056 |
| DH | 3,4,3',5'-Tetrahydroxystilbene-3-Glucoside | NCAN     | 0.8235 |
| DH | 3,4,3',5'-Tetrahydroxystilbene-3-Glucoside | NUDT9    | 0.8235 |
| DH | 3,4,3',5'-Tetrahydroxystilbene-3-Glucoside | PTGS1    | 0.8235 |
| DH | 3,4,3',5'-Tetrahydroxystilbene-3-Glucoside | PYGL     | 0.8235 |
| DH | 3,4,3',5'-Tetrahydroxystilbene-3-Glucoside | PYGM     | 0.8235 |
| DH | 3,4,3',5'-Tetrahydroxystilbene-3-Glucoside | SFTPD    | 0.8235 |
| DH | 3,4,3',5'-Tetrahydroxystilbene-3-Glucoside | SIGLEC1  | 0.8235 |
| DH | 3,4,3',5'-Tetrahydroxystilbene-3-Glucoside | SMARCA5  | 0.8235 |
| DH | 3,4,3',5'-Tetrahydroxystilbene-3-Glucoside | TM0024   | 0.8235 |
| DH | 3,4,3',5'-Tetrahydroxystilbene-3-Glucoside | TYR      | 0.9412 |
| DH | Anthraglycoside B                          | AHR      | 0.8571 |
| DH | Anthraglycoside B                          | AKR1C3   | 0.9    |
| DH | Anthraglycoside B                          | ALDH2    | 0.9    |
| DH | Anthraglycoside B                          | AR       | 0.9231 |
| DH | Anthraglycoside B                          | AURKB    | 0.8571 |



|    |                                                   |         |        |
|----|---------------------------------------------------|---------|--------|
| DH | Anthraglycoside B                                 | CBR1    | 0.9    |
| DH | Anthraglycoside B                                 | TOP2A   | 0.8085 |
| DH | Anthraglycoside B                                 | TYR     | 0.8421 |
| DH | 5-Carboxy-7-Glucosyloxy-2-Methyl-Benzopyran-1-one | ABO     | 0.8    |
| DH | 5-Carboxy-7-Glucosyloxy-2-Methyl-Benzopyran-1-one | AHR     | 0.8571 |
| DH | 5-Carboxy-7-Glucosyloxy-2-Methyl-Benzopyran-1-one | AKR1C3  | 0.9    |
| DH | 5-Carboxy-7-Glucosyloxy-2-Methyl-Benzopyran-1-one | ALDH2   | 0.9    |
| DH | 5-Carboxy-7-Glucosyloxy-2-Methyl-Benzopyran-1-one | AR      | 0.9231 |
| DH | 5-Carboxy-7-Glucosyloxy-2-Methyl-Benzopyran-1-one | AURKB   | 0.8571 |
| DH | 5-Carboxy-7-Glucosyloxy-2-Methyl-Benzopyran-1-one | CBR1    | 0.9    |
| DH | 5-Carboxy-7-Glucosyloxy-2-Methyl-Benzopyran-1-one | TYR     | 0.8421 |
| DH | 5-Carboxy-7-Hydroxy-2-Methyl-Benzopyran-1-one     | ALOX5   | 0.8077 |
| DH | 5-Carboxy-7-Hydroxy-2-Methyl-Benzopyran-1-one     | CA1     | 0.8    |
| DH | 5-Carboxy-7-Hydroxy-2-Methyl-Benzopyran-1-one     | CA12    | 0.8    |
| DH | 5-Carboxy-7-Hydroxy-2-Methyl-Benzopyran-1-one     | CA14    | 0.8    |
| DH | 5-Carboxy-7-Hydroxy-2-Methyl-Benzopyran-1-one     | CA2     | 0.8    |
| DH | 5-Carboxy-7-Hydroxy-2-Methyl-Benzopyran-1-one     | CA3     | 0.8    |
| DH | 5-Carboxy-7-Hydroxy-2-Methyl-Benzopyran-1-one     | CA4     | 0.8    |
| DH | 5-Carboxy-7-Hydroxy-2-Methyl-Benzopyran-1-one     | CA5A    | 0.8    |
| DH | 5-Carboxy-7-Hydroxy-2-Methyl-Benzopyran-1-one     | CA5B    | 0.8    |
| DH | 5-Carboxy-7-Hydroxy-2-Methyl-Benzopyran-1-one     | CA6     | 0.8    |
| DH | 5-Carboxy-7-Hydroxy-2-Methyl-Benzopyran-1-one     | CA7     | 0.8    |
| DH | 5-Carboxy-7-Hydroxy-2-Methyl-Benzopyran-1-one     | CA9     | 0.8    |
| DH | 5-Carboxy-7-Hydroxy-2-Methyl-Benzopyran-1-one     | CRYZ    | 0.8    |
| DH | 5-Carboxy-7-Hydroxy-2-Methyl-Benzopyran-1-one     | CSNK2A1 | 0.8    |
| DH | 5-Carboxy-7-Hydroxy-2-Methyl-Benzopyran-1-one     | IGHG1   | 0.8214 |
| DH | 5-Carboxy-7-Hydroxy-2-Methyl-Benzopyran-1-one     | NQO1    | 0.8    |
| DH | 5-Carboxy-7-Hydroxy-2-Methyl-Benzopyran-1-one     | NR1H2   | 0.8077 |
| DH | 5-Carboxy-7-Hydroxy-2-Methyl-Benzopyran-1-one     | NR1H3   | 0.8077 |

|    |                                                |        |        |
|----|------------------------------------------------|--------|--------|
| DH | 5-Carboxy-7-Hydroxy-2-Methyl-Benzopyran-1'-One | PRKACA | 0.8    |
| DH | 5-Carboxy-7-Hydroxy-2-Methyl-Benzopyran-1'-One | PRKCA  | 0.8    |
| DH | 5-Carboxy-7-Hydroxy-2-Methyl-Benzopyran-1'-One | PRKCB  | 0.8    |
| DH | 5-Carboxy-7-Hydroxy-2-Methyl-Benzopyran-1'-One | SQLE   | 0.8    |
| DH | 5-Carboxy-7-Hydroxy-2-Methyl-Benzopyran-1'-One | SYK    | 0.8    |
| DH | 5-Carboxy-7-Hydroxy-2-Methyl-Benzopyran-1'-One | VKORC1 | 0.8    |
| DH | Cassiachromone                                 | CYP2C9 | 0.871  |
| DH | Cassiachromone                                 | NR1I2  | 0.871  |
| DH | Cassiachromone                                 | VKORC1 | 0.871  |
| DH | 1-O-Galloyl-Glycerol                           | PTGS1  | 0.8485 |
| DH | 1-O-Galloyl-Glycerol                           | PTGS2  | 0.8485 |
| DH | 6-Hydroxymusizin-8-O-1'-D-Glucoside            | AHR    | 0.9024 |
| DH | 6-Hydroxymusizin-8-O-1'-D-Glucoside            | AKR1C3 | 0.9    |
| DH | 6-Hydroxymusizin-8-O-1'-D-Glucoside            | ALDH2  | 0.9    |
| DH | 6-Hydroxymusizin-8-O-1'-D-Glucoside            | AR     | 0.9231 |
| DH | 6-Hydroxymusizin-8-O-1'-D-Glucoside            | AURKB  | 0.9024 |
| DH | 6-Hydroxymusizin-8-O-1'-D-Glucoside            | CBR1   | 0.9    |
| DH | 6-Hydroxymusizin-8-O-1'-D-Glucoside            | TYR    | 0.8421 |
| DH | 2-Methyl-5-Carboxymethyl-7-Hydroxychromanone   | CYP2C9 | 0.8788 |
| DH | 2-Methyl-5-Carboxymethyl-7-Hydroxychromanone   | NR1I2  | 0.8788 |
| DH | 2-Methyl-5-Carboxymethyl-7-Hydroxychromanone   | VKORC1 | 0.8788 |
| DH | 2-Methyl-5-Carboxymethyl-7-Hydroxychromone     | CYP2C9 | 0.8438 |
| DH | 2-Methyl-5-Carboxymethyl-7-Hydroxychromone     | NR1I2  | 0.8438 |
| DH | 2-Methyl-5-Carboxymethyl-7-Hydroxychromone     | VKORC1 | 0.8438 |
| DH | Musizin-8-O-1'-D-Glucoside                     | AHR    | 0.9024 |
| DH | Musizin-8-O-1'-D-Glucoside                     | AKR1C3 | 0.9    |
| DH | Musizin-8-O-1'-D-Glucoside                     | ALDH2  | 0.9    |
| DH | Musizin-8-O-1'-D-Glucoside                     | AR     | 0.9231 |
| DH | Musizin-8-O-1'-D-Glucoside                     | AURKB  | 0.9024 |
| DH | Musizin-8-O-1'-D-Glucoside                     | CBR1   | 0.9    |
| DH | Musizin-8-O-1'-D-Glucoside                     | TYR    | 0.8421 |
| DH | Phenylbutanone-Glucoside                       | TYR    | 0.8421 |
| DH | Rhaponticin                                    | ABO    | 0.8421 |
| DH | Rhaponticin                                    | AHR    | 0.8095 |
| DH | Rhaponticin                                    | AKR1C3 | 0.8049 |
| DH | Rhaponticin                                    | ALDH2  | 0.8049 |

|    |                                                  |        |        |
|----|--------------------------------------------------|--------|--------|
| DH | Rhaponticin                                      | AR     | 0.825  |
| DH | Rhaponticin                                      | AURKB  | 0.8095 |
| DH | Rhaponticin                                      | CBR1   | 0.8049 |
| DH | Rhaponticin                                      | MBL2   | 0.8611 |
| DH | Rhaponticin                                      | TYR    | 0.8889 |
| DH | Rhapontigenin                                    | ATP5A1 | 0.84   |
| DH | Rhapontigenin                                    | ATP5B  | 0.84   |
| DH | Rhapontigenin                                    | ATP5C1 | 0.84   |
| DH | Rhapontigenin                                    | SHBG   | 0.84   |
| DH | Sennoside B                                      | AHR    | 0.8605 |
| DH | Sennoside B                                      | AKR1C3 | 0.9024 |
| DH | Sennoside B                                      | ALDH2  | 0.95   |
| DH | Sennoside B                                      | AMY2B  | 0.8    |
| DH | Sennoside B                                      | AR     | 0.925  |
| DH | Sennoside B                                      | AURKB  | 0.8605 |
| DH | Sennoside B                                      | CBR1   | 0.9024 |
| DH | Sennoside B                                      | DHFRL1 | 0.8    |
| DH | Sennoside B                                      | DNMT1  | 0.8    |
| DH | Sennoside B                                      | GLT6D1 | 0.8    |
| DH | Sennoside B                                      | GLTP   | 0.8    |
| DH | Sennoside B                                      | LGALS3 | 0.8    |
| DH | Sennoside B                                      | TYR    | 0.8    |
| DH | Torachryson-8-O- $\beta$ -D-Glucoside            | AHR    | 0.9048 |
| DH | Torachryson-8-O- $\beta$ -D-Glucoside            | AKR1C3 | 0.8571 |
| DH | Torachryson-8-O- $\beta$ -D-Glucoside            | ALDH2  | 0.8571 |
| DH | Torachryson-8-O- $\beta$ -D-Glucoside            | AR     | 0.878  |
| DH | Torachryson-8-O- $\beta$ -D-Glucoside            | AURKB  | 0.9048 |
| DH | Torachryson-8-O- $\beta$ -D-Glucoside            | CBR1   | 0.8571 |
| DH | Torachryson-8-O- $\beta$ -D-Glucoside            | TYR    | 0.8    |
| DH | Torachryson-8-O- $\beta$ -D-(6'-Oxayl)-Glucoside | AHR    | 0.9048 |
| DH | Torachryson-8-O- $\beta$ -D-(6'-Oxayl)-Glucoside | AKR1C3 | 0.8571 |
| DH | Torachryson-8-O- $\beta$ -D-(6'-Oxayl)-Glucoside | ALDH2  | 0.814  |
| DH | Torachryson-8-O- $\beta$ -D-(6'-Oxayl)-Glucoside | AR     | 0.8333 |
| DH | Torachryson-8-O- $\beta$ -D-(6'-Oxayl)-Glucoside | AURKB  | 0.9048 |
| DH | Torachryson-8-O- $\beta$ -D-(6'-Oxayl)-Glucoside | CBR1   | 0.8571 |
| DH | Procyanidin B1-6-C- $\beta$ -D-Glucopyranoside   | AHR    | 0.8095 |
| DH | Procyanidin B1-6-C- $\beta$ -D-Glucopyranoside   | AKR1C3 | 0.85   |
| DH | Procyanidin B1-6-C- $\beta$ -D-Glucopyranoside   | ALDH2  | 0.8974 |

|    |                                                             |         |        |
|----|-------------------------------------------------------------|---------|--------|
| DH | Procyanidin B1-6-C- $\hat{I}$ '-D-Glucopyranoside           | AR      | 0.8718 |
| DH | Procyanidin B1-6-C- $\hat{I}$ '-D-Glucopyranoside           | AURKB   | 0.8095 |
| DH | Procyanidin B1-6-C- $\hat{I}$ '-D-Glucopyranoside           | CBR1    | 0.85   |
| SQ | Sitosterol, $\hat{I}$ '-Sitosterol                          | AKR1C2  | 0.8158 |
| SQ | Sitosterol, $\hat{I}$ '-Sitosterol                          | AR      | 0.8421 |
| SQ | Sitosterol, $\hat{I}$ '-Sitosterol                          | CLEC4E  | 0.9714 |
| SQ | Sitosterol, $\hat{I}$ '-Sitosterol                          | ESR1    | 0.8421 |
| SQ | Sitosterol, $\hat{I}$ '-Sitosterol                          | ESR2    | 0.8378 |
| SQ | Sitosterol, $\hat{I}$ '-Sitosterol                          | GABRA1  | 0.8378 |
| SQ | Sitosterol, $\hat{I}$ '-Sitosterol                          | GABRA2  | 0.8378 |
| SQ | Sitosterol, $\hat{I}$ '-Sitosterol                          | GABRA3  | 0.8378 |
| SQ | Sitosterol, $\hat{I}$ '-Sitosterol                          | GABRA4  | 0.8378 |
| SQ | Sitosterol, $\hat{I}$ '-Sitosterol                          | GABRA5  | 0.8378 |
| SQ | Sitosterol, $\hat{I}$ '-Sitosterol                          | GABRA6  | 0.8378 |
| SQ | Sitosterol, $\hat{I}$ '-Sitosterol                          | GABRB1  | 0.8378 |
| SQ | Sitosterol, $\hat{I}$ '-Sitosterol                          | GABRB2  | 0.8378 |
| SQ | Sitosterol, $\hat{I}$ '-Sitosterol                          | GABRB3  | 0.8378 |
| SQ | Sitosterol, $\hat{I}$ '-Sitosterol                          | GABRD   | 0.8378 |
| SQ | Sitosterol, $\hat{I}$ '-Sitosterol                          | GABRE   | 0.8378 |
| SQ | Sitosterol, $\hat{I}$ '-Sitosterol                          | GABRG1  | 0.8378 |
| SQ | Sitosterol, $\hat{I}$ '-Sitosterol                          | GABRG2  | 0.8378 |
| SQ | Sitosterol, $\hat{I}$ '-Sitosterol                          | GABRG3  | 0.8378 |
| SQ | Sitosterol, $\hat{I}$ '-Sitosterol                          | GABRP   | 0.8378 |
| SQ | Sitosterol, $\hat{I}$ '-Sitosterol                          | GABRQ   | 0.8378 |
| SQ | Sitosterol, $\hat{I}$ '-Sitosterol                          | GRIN1   | 0.8378 |
| SQ | Sitosterol, $\hat{I}$ '-Sitosterol                          | GRIN2A  | 0.8378 |
| SQ | Sitosterol, $\hat{I}$ '-Sitosterol                          | GRIN2B  | 0.8378 |
| SQ | Sitosterol, $\hat{I}$ '-Sitosterol                          | GRIN2C  | 0.8378 |
| SQ | Sitosterol, $\hat{I}$ '-Sitosterol                          | GRIN2D  | 0.8378 |
| SQ | Sitosterol, $\hat{I}$ '-Sitosterol                          | GRIN3A  | 0.8378 |
| SQ | Sitosterol, $\hat{I}$ '-Sitosterol                          | GRIN3B  | 0.8378 |
| SQ | Sitosterol, $\hat{I}$ '-Sitosterol                          | HSD17B1 | 0.8378 |
| SQ | Sitosterol, $\hat{I}$ '-Sitosterol                          | LIP3    | 0.8205 |
| SQ | Sitosterol, $\hat{I}$ '-Sitosterol                          | LSS     | 0.9444 |
| SQ | Sitosterol, $\hat{I}$ '-Sitosterol                          | NCOA2   | 0.8158 |
| SQ | Sitosterol, $\hat{I}$ '-Sitosterol                          | NR1I2   | 0.8649 |
| SQ | Sitosterol, $\hat{I}$ '-Sitosterol                          | NR1I3   | 0.9714 |
| SQ | Sitosterol, $\hat{I}$ '-Sitosterol                          | NR3C1   | 0.825  |
| SQ | Sitosterol, $\hat{I}$ '-Sitosterol                          | NR3C2   | 0.8158 |
| SQ | Sitosterol, $\hat{I}$ '-Sitosterol                          | PGR     | 0.8378 |
| SQ | Sitosterol, $\hat{I}$ '-Sitosterol                          | PPARA   | 0.8378 |
| SQ | Sitosterol, $\hat{I}$ '-Sitosterol                          | RORA    | 0.9714 |
| SQ | Sitosterol, $\hat{I}$ '-Sitosterol                          | SIGMAR1 | 0.8378 |
| SQ | Sitosterol, $\hat{I}$ '-Sitosterol                          | SULT2A1 | 0.8378 |
| SQ | Sitosterol, $\hat{I}$ '-Sitosterol                          | SULT2B1 | 0.8649 |
| SQ | Sitosterol, $\hat{I}$ '-Sitosterol                          | VDR     | 0.9714 |
| SQ | Guercetol,Quercetin,Quercetin ,Sophoretin,Meletin,Xanthauri | ACTB    | 1      |
| SQ | Guercetol,Quercetin,Quercetin ,Sophoretin,Meletin,Xanthauri | AHR     | 1      |
| SQ | Guercetol,Quercetin,Quercetin ,Sophoretin,Meletin,Xanthauri | AKR1C1  | 0.8333 |

|    |                                                                |         |        |
|----|----------------------------------------------------------------|---------|--------|
| SQ | Guercetol,Quercetin,Quercetin<br>,Sophoretin,Meletin,Xanthauri | AKT1    | 0.9286 |
| SQ | Guercetol,Quercetin,Quercetin<br>,Sophoretin,Meletin,Xanthauri | ATP5A1  | 1      |
| SQ | Guercetol,Quercetin,Quercetin<br>,Sophoretin,Meletin,Xanthauri | ATP5B   | 1      |
| SQ | Guercetol,Quercetin,Quercetin<br>,Sophoretin,Meletin,Xanthauri | ATP5C1  | 1      |
| SQ | Guercetol,Quercetin,Quercetin<br>,Sophoretin,Meletin,Xanthauri | CA1     | 0.8387 |
| SQ | Guercetol,Quercetin,Quercetin<br>,Sophoretin,Meletin,Xanthauri | CA12    | 0.8387 |
| SQ | Guercetol,Quercetin,Quercetin<br>,Sophoretin,Meletin,Xanthauri | CA14    | 0.8387 |
| SQ | Guercetol,Quercetin,Quercetin<br>,Sophoretin,Meletin,Xanthauri | CA2     | 0.8387 |
| SQ | Guercetol,Quercetin,Quercetin<br>,Sophoretin,Meletin,Xanthauri | CA3     | 0.8387 |
| SQ | Guercetol,Quercetin,Quercetin<br>,Sophoretin,Meletin,Xanthauri | CA4     | 0.8387 |
| SQ | Guercetol,Quercetin,Quercetin<br>,Sophoretin,Meletin,Xanthauri | CA5A    | 0.8387 |
| SQ | Guercetol,Quercetin,Quercetin<br>,Sophoretin,Meletin,Xanthauri | CA5B    | 0.8387 |
| SQ | Guercetol,Quercetin,Quercetin<br>,Sophoretin,Meletin,Xanthauri | CA6     | 0.8387 |
| SQ | Guercetol,Quercetin,Quercetin<br>,Sophoretin,Meletin,Xanthauri | CA7     | 0.8387 |
| SQ | Guercetol,Quercetin,Quercetin<br>,Sophoretin,Meletin,Xanthauri | CA9     | 0.8387 |
| SQ | Guercetol,Quercetin,Quercetin<br>,Sophoretin,Meletin,Xanthauri | CBR1    | 1      |
| SQ | Guercetol,Quercetin,Quercetin<br>,Sophoretin,Meletin,Xanthauri | CDK6    | 0.9643 |
| SQ | Guercetol,Quercetin,Quercetin<br>,Sophoretin,Meletin,Xanthauri | CEBPB   | 1      |
| SQ | Guercetol,Quercetin,Quercetin<br>,Sophoretin,Meletin,Xanthauri | COMT    | 0.931  |
| SQ | Guercetol,Quercetin,Quercetin<br>,Sophoretin,Meletin,Xanthauri | CSNK2A1 | 1      |
| SQ | Guercetol,Quercetin,Quercetin<br>,Sophoretin,Meletin,Xanthauri | CSNK2B  | 1      |
| SQ | Guercetol,Quercetin,Quercetin<br>,Sophoretin,Meletin,Xanthauri | CYP19A1 | 0.8333 |
| SQ | Guercetol,Quercetin,Quercetin<br>,Sophoretin,Meletin,Xanthauri | CYP1B1  | 1      |
| SQ | Guercetol,Quercetin,Quercetin<br>,Sophoretin,Meletin,Xanthauri | DHFRL1  | 0.875  |
| SQ | Guercetol,Quercetin,Quercetin<br>,Sophoretin,Meletin,Xanthauri | DNMT1   | 0.875  |
| SQ | Guercetol,Quercetin,Quercetin<br>,Sophoretin,Meletin,Xanthauri | EIF3F   | 1      |
| SQ | Guercetol,Quercetin,Quercetin<br>,Sophoretin,Meletin,Xanthauri | ESR1    | 1      |

|    |                                                                |          |        |
|----|----------------------------------------------------------------|----------|--------|
| SQ | Guercetol,Quercetin,Quercetin<br>,Sophoretin,Meletin,Xanthauri | ESR2     | 1      |
| SQ | Guercetol,Quercetin,Quercetin<br>,Sophoretin,Meletin,Xanthauri | ESRRA    | 0.9286 |
| SQ | Guercetol,Quercetin,Quercetin<br>,Sophoretin,Meletin,Xanthauri | ESRRB    | 0.9286 |
| SQ | Guercetol,Quercetin,Quercetin<br>,Sophoretin,Meletin,Xanthauri | GABRA1   | 0.8438 |
| SQ | Guercetol,Quercetin,Quercetin<br>,Sophoretin,Meletin,Xanthauri | GABRA2   | 0.8438 |
| SQ | Guercetol,Quercetin,Quercetin<br>,Sophoretin,Meletin,Xanthauri | GABRA3   | 0.8438 |
| SQ | Guercetol,Quercetin,Quercetin<br>,Sophoretin,Meletin,Xanthauri | GABRA4   | 0.8438 |
| SQ | Guercetol,Quercetin,Quercetin<br>,Sophoretin,Meletin,Xanthauri | GABRA5   | 0.8438 |
| SQ | Guercetol,Quercetin,Quercetin<br>,Sophoretin,Meletin,Xanthauri | GABRA6   | 0.8438 |
| SQ | Guercetol,Quercetin,Quercetin<br>,Sophoretin,Meletin,Xanthauri | GABRG1   | 0.8438 |
| SQ | Guercetol,Quercetin,Quercetin<br>,Sophoretin,Meletin,Xanthauri | GABRG2   | 0.8438 |
| SQ | Guercetol,Quercetin,Quercetin<br>,Sophoretin,Meletin,Xanthauri | GABRG3   | 0.8438 |
| SQ | Guercetol,Quercetin,Quercetin<br>,Sophoretin,Meletin,Xanthauri | GPBR1    | 0.9286 |
| SQ | Guercetol,Quercetin,Quercetin<br>,Sophoretin,Meletin,Xanthauri | HCK      | 1      |
| SQ | Guercetol,Quercetin,Quercetin<br>,Sophoretin,Meletin,Xanthauri | HIBCH    | 1      |
| SQ | Guercetol,Quercetin,Quercetin<br>,Sophoretin,Meletin,Xanthauri | HSP90AA1 | 1      |
| SQ | Guercetol,Quercetin,Quercetin<br>,Sophoretin,Meletin,Xanthauri | HSPA2    | 1      |
| SQ | Guercetol,Quercetin,Quercetin<br>,Sophoretin,Meletin,Xanthauri | IGHG1    | 0.8621 |
| SQ | Guercetol,Quercetin,Quercetin<br>,Sophoretin,Meletin,Xanthauri | JAK1     | 1      |
| SQ | Guercetol,Quercetin,Quercetin<br>,Sophoretin,Meletin,Xanthauri | KANSL3   | 0.8333 |
| SQ | Guercetol,Quercetin,Quercetin<br>,Sophoretin,Meletin,Xanthauri | MTTP     | 0.8182 |
| SQ | Guercetol,Quercetin,Quercetin<br>,Sophoretin,Meletin,Xanthauri | NCOA1    | 0.9286 |
| SQ | Guercetol,Quercetin,Quercetin<br>,Sophoretin,Meletin,Xanthauri | NCOA2    | 0.9286 |
| SQ | Guercetol,Quercetin,Quercetin<br>,Sophoretin,Meletin,Xanthauri | NQO2     | 1      |
| SQ | Guercetol,Quercetin,Quercetin<br>,Sophoretin,Meletin,Xanthauri | NR1I2    | 1      |
| SQ | Guercetol,Quercetin,Quercetin<br>,Sophoretin,Meletin,Xanthauri | PIK3CG   | 1      |
| SQ | Guercetol,Quercetin,Quercetin<br>,Sophoretin,Meletin,Xanthauri | PIM1     | 1      |

|    |                                                                |        |        |
|----|----------------------------------------------------------------|--------|--------|
| SQ | Guercetol,Quercetin,Quercetin<br>,Sophoretin,Meletin,Xanthauri | PRKACA | 0.8387 |
| SQ | Guercetol,Quercetin,Quercetin<br>,Sophoretin,Meletin,Xanthauri | PRKCA  | 0.8387 |
| SQ | Guercetol,Quercetin,Quercetin<br>,Sophoretin,Meletin,Xanthauri | PRKCB  | 0.8387 |
| SQ | Guercetol,Quercetin,Quercetin<br>,Sophoretin,Meletin,Xanthauri | PTK2B  | 0.9286 |
| SQ | Guercetol,Quercetin,Quercetin<br>,Sophoretin,Meletin,Xanthauri | RUVBL2 | 1      |
| SQ | Guercetol,Quercetin,Quercetin<br>,Sophoretin,Meletin,Xanthauri | SF3B3  | 1      |
| SQ | Guercetol,Quercetin,Quercetin<br>,Sophoretin,Meletin,Xanthauri | SHBG   | 1      |
| SQ | Guercetol,Quercetin,Quercetin<br>,Sophoretin,Meletin,Xanthauri | SOAT1  | 0.8182 |
| SQ | Guercetol,Quercetin,Quercetin<br>,Sophoretin,Meletin,Xanthauri | SOAT2  | 0.8182 |
| SQ | Guercetol,Quercetin,Quercetin<br>,Sophoretin,Meletin,Xanthauri | SQLE   | 0.8387 |
| SQ | Guercetol,Quercetin,Quercetin<br>,Sophoretin,Meletin,Xanthauri | STK17B | 1      |
| SQ | Guercetol,Quercetin,Quercetin<br>,Sophoretin,Meletin,Xanthauri | SYK    | 0.8387 |
| SQ | Guercetol,Quercetin,Quercetin<br>,Sophoretin,Meletin,Xanthauri | TOP2A  | 0.9286 |
| SQ | Guercetol,Quercetin,Quercetin<br>,Sophoretin,Meletin,Xanthauri | UBA1   | 1      |
| SQ | Guercetol,Quercetin,Quercetin<br>,Sophoretin,Meletin,Xanthauri | UGT3A1 | 1      |
| SQ | Ethyl Palmitate                                                | IGHG1  | 0.8571 |
| SQ | Ethyl Palmitate                                                | LCN2   | 0.8571 |
| SQ | Stigmasterol                                                   | AKR1C1 | 0.8158 |
| SQ | Stigmasterol                                                   | AKR1C2 | 0.8158 |
| SQ | Stigmasterol                                                   | AR     | 0.8421 |
| SQ | Stigmasterol                                                   | CLEC4E | 0.9714 |
| SQ | Stigmasterol                                                   | ESR1   | 0.8421 |
| SQ | Stigmasterol                                                   | ESR2   | 0.8378 |
| SQ | Stigmasterol                                                   | GABRA1 | 0.8378 |
| SQ | Stigmasterol                                                   | GABRA2 | 0.8378 |
| SQ | Stigmasterol                                                   | GABRA3 | 0.8378 |
| SQ | Stigmasterol                                                   | GABRA4 | 0.8378 |
| SQ | Stigmasterol                                                   | GABRA5 | 0.8378 |
| SQ | Stigmasterol                                                   | GABRA6 | 0.8378 |
| SQ | Stigmasterol                                                   | GABRB1 | 0.8378 |
| SQ | Stigmasterol                                                   | GABRB2 | 0.8378 |
| SQ | Stigmasterol                                                   | GABRB3 | 0.8378 |
| SQ | Stigmasterol                                                   | GABRD  | 0.8378 |
| SQ | Stigmasterol                                                   | GABRE  | 0.8378 |
| SQ | Stigmasterol                                                   | GABRG1 | 0.8378 |
| SQ | Stigmasterol                                                   | GABRG2 | 0.8378 |
| SQ | Stigmasterol                                                   | GABRG3 | 0.8378 |
| SQ | Stigmasterol                                                   | GABRP  | 0.8378 |
| SQ | Stigmasterol                                                   | GABRQ  | 0.8378 |
| SQ | Stigmasterol                                                   | GRIN1  | 0.8378 |

|    |                                              |         |        |
|----|----------------------------------------------|---------|--------|
| SQ | Stigmasterol                                 | GRIN2A  | 0.8378 |
| SQ | Stigmasterol                                 | GRIN2B  | 0.8378 |
| SQ | Stigmasterol                                 | GRIN2C  | 0.8378 |
| SQ | Stigmasterol                                 | GRIN2D  | 0.8378 |
| SQ | Stigmasterol                                 | GRIN3A  | 0.8378 |
| SQ | Stigmasterol                                 | GRIN3B  | 0.8378 |
| SQ | Stigmasterol                                 | HSD17B1 | 0.8378 |
| SQ | Stigmasterol                                 | LIP3    | 0.8205 |
| SQ | Stigmasterol                                 | LSS     | 0.9444 |
| SQ | Stigmasterol                                 | NCOA2   | 0.8158 |
| SQ | Stigmasterol                                 | NR1I2   | 0.8649 |
| SQ | Stigmasterol                                 | NR1I3   | 0.9714 |
| SQ | Stigmasterol                                 | NR3C1   | 0.825  |
| SQ | Stigmasterol                                 | NR3C2   | 0.8158 |
| SQ | Stigmasterol                                 | PGR     | 0.8378 |
| SQ | Stigmasterol                                 | PPARA   | 0.8378 |
| SQ | Stigmasterol                                 | RORA    | 0.9714 |
| SQ | Stigmasterol                                 | SIGMAR1 | 0.8378 |
| SQ | Stigmasterol                                 | SULT2A1 | 0.8378 |
| SQ | Stigmasterol                                 | SULT2B1 | 0.8649 |
| SQ | Stigmasterol                                 | VDR     | 0.9714 |
| SQ | Cetylic Acid,Hexadecanoic Acid,Palmitic Acid | ABAT    | 0.8095 |
| SQ | Cetylic Acid,Hexadecanoic Acid,Palmitic Acid | ABL1    | 1      |
| SQ | Cetylic Acid,Hexadecanoic Acid,Palmitic Acid | ACADSB  | 0.8095 |
| SQ | Cetylic Acid,Hexadecanoic Acid,Palmitic Acid | ACOX1   | 0.8    |
| SQ | Cetylic Acid,Hexadecanoic Acid,Palmitic Acid | ACSL3   | 0.8571 |
| SQ | Cetylic Acid,Hexadecanoic Acid,Palmitic Acid | ACSL4   | 0.8571 |
| SQ | Cetylic Acid,Hexadecanoic Acid,Palmitic Acid | ADH5    | 1      |
| SQ | Cetylic Acid,Hexadecanoic Acid,Palmitic Acid | ALDH5A1 | 0.8095 |
| SQ | Cetylic Acid,Hexadecanoic Acid,Palmitic Acid | ARF1    | 1      |
| SQ | Cetylic Acid,Hexadecanoic Acid,Palmitic Acid | ARF6    | 1      |
| SQ | Cetylic Acid,Hexadecanoic Acid,Palmitic Acid | C8G     | 1      |
| SQ | Cetylic Acid,Hexadecanoic Acid,Palmitic Acid | CALM1   | 1      |
| SQ | Cetylic Acid,Hexadecanoic Acid,Palmitic Acid | CNR1    | 0.8333 |
| SQ | Cetylic Acid,Hexadecanoic Acid,Palmitic Acid | CNR2    | 0.8333 |
| SQ | Cetylic Acid,Hexadecanoic Acid,Palmitic Acid | CYP2C8  | 1      |
| SQ | Cetylic Acid,Hexadecanoic Acid,Palmitic Acid | ECI2    | 1      |
| SQ | Cetylic Acid,Hexadecanoic Acid,Palmitic Acid | ELOVL4  | 0.8571 |



|    |                                              |         |        |
|----|----------------------------------------------|---------|--------|
| SQ | Cetylic Acid,Hexadecanoic Acid,Palmitic Acid | FADS1   | 0.8571 |
| SQ | Cetylic Acid,Hexadecanoic Acid,Palmitic Acid | FADS2   | 0.8571 |
| SQ | Cetylic Acid,Hexadecanoic Acid,Palmitic Acid | FFAR1   | 0.8571 |
| SQ | Cetylic Acid,Hexadecanoic Acid,Palmitic Acid | FKBP1A  | 1      |
| SQ | Cetylic Acid,Hexadecanoic Acid,Palmitic Acid | FURIN   | 1      |
| SQ | Cetylic Acid,Hexadecanoic Acid,Palmitic Acid | GLTP    | 1      |
| SQ | Cetylic Acid,Hexadecanoic Acid,Palmitic Acid | GM2A    | 1      |
| SQ | Cetylic Acid,Hexadecanoic Acid,Palmitic Acid | GUCA1A  | 1      |
| SQ | Cetylic Acid,Hexadecanoic Acid,Palmitic Acid | HAO1    | 0.8    |
| SQ | Cetylic Acid,Hexadecanoic Acid,Palmitic Acid | HDAC2   | 0.8095 |
| SQ | Cetylic Acid,Hexadecanoic Acid,Palmitic Acid | HDAC9   | 0.8095 |
| SQ | Cetylic Acid,Hexadecanoic Acid,Palmitic Acid | HNF4A   | 1      |
| SQ | Cetylic Acid,Hexadecanoic Acid,Palmitic Acid | HNF4G   | 1      |
| SQ | Cetylic Acid,Hexadecanoic Acid,Palmitic Acid | INS     | 1      |
| SQ | Cetylic Acid,Hexadecanoic Acid,Palmitic Acid | LALBA   | 1      |
| SQ | Cetylic Acid,Hexadecanoic Acid,Palmitic Acid | LIP3    | 1      |
| SQ | Cetylic Acid,Hexadecanoic Acid,Palmitic Acid | LTB4R   | 0.8    |
| SQ | Cetylic Acid,Hexadecanoic Acid,Palmitic Acid | LTB4R2  | 0.8    |
| SQ | Cetylic Acid,Hexadecanoic Acid,Palmitic Acid | LTF     | 1      |
| SQ | Cetylic Acid,Hexadecanoic Acid,Palmitic Acid | LY96    | 1      |
| SQ | Cetylic Acid,Hexadecanoic Acid,Palmitic Acid | NCOA1   | 1      |
| SQ | Cetylic Acid,Hexadecanoic Acid,Palmitic Acid | NR1H4   | 0.9524 |
| SQ | Cetylic Acid,Hexadecanoic Acid,Palmitic Acid | OGDH    | 0.8095 |
| SQ | Cetylic Acid,Hexadecanoic Acid,Palmitic Acid | PAEP    | 1      |
| SQ | Cetylic Acid,Hexadecanoic Acid,Palmitic Acid | PKIA    | 1      |
| SQ | Cetylic Acid,Hexadecanoic Acid,Palmitic Acid | PLA2G1B | 1      |
| SQ | Cetylic Acid,Hexadecanoic Acid,Palmitic Acid | PLA2G2A | 1      |

|    |                                              |             |        |
|----|----------------------------------------------|-------------|--------|
| SQ | Cetylic Acid,Hexadecanoic Acid,Palmitic Acid | PLA2G2D     | 1      |
| SQ | Cetylic Acid,Hexadecanoic Acid,Palmitic Acid | PLA2G2E     | 1      |
| SQ | Cetylic Acid,Hexadecanoic Acid,Palmitic Acid | PMP2        | 1      |
| SQ | Cetylic Acid,Hexadecanoic Acid,Palmitic Acid | PPARA       | 1      |
| SQ | Cetylic Acid,Hexadecanoic Acid,Palmitic Acid | PPARD       | 0.9524 |
| SQ | Cetylic Acid,Hexadecanoic Acid,Palmitic Acid | PPARG       | 1      |
| SQ | Cetylic Acid,Hexadecanoic Acid,Palmitic Acid | PPA_RS05235 | 0.9524 |
| SQ | Cetylic Acid,Hexadecanoic Acid,Palmitic Acid | PPP3CA      | 1      |
| SQ | Cetylic Acid,Hexadecanoic Acid,Palmitic Acid | PPP3R1      | 1      |
| SQ | Cetylic Acid,Hexadecanoic Acid,Palmitic Acid | PPT1        | 1      |
| SQ | Cetylic Acid,Hexadecanoic Acid,Palmitic Acid | PRKACA      | 1      |
| SQ | Cetylic Acid,Hexadecanoic Acid,Palmitic Acid | PTGS1       | 0.9524 |
| SQ | Cetylic Acid,Hexadecanoic Acid,Palmitic Acid | PTGS2       | 0.9524 |
| SQ | Cetylic Acid,Hexadecanoic Acid,Palmitic Acid | PVR         | 1      |
| SQ | Cetylic Acid,Hexadecanoic Acid,Palmitic Acid | RCVRN       | 1      |
| SQ | Cetylic Acid,Hexadecanoic Acid,Palmitic Acid | RHO         | 1      |
| SQ | Cetylic Acid,Hexadecanoic Acid,Palmitic Acid | RXRA        | 0.9524 |
| SQ | Cetylic Acid,Hexadecanoic Acid,Palmitic Acid | RXRB        | 0.8095 |
| SQ | Cetylic Acid,Hexadecanoic Acid,Palmitic Acid | RXRG        | 0.8095 |
| SQ | Cetylic Acid,Hexadecanoic Acid,Palmitic Acid | S100B       | 0.8571 |
| SQ | Cetylic Acid,Hexadecanoic Acid,Palmitic Acid | SCN10A      | 0.8095 |
| SQ | Cetylic Acid,Hexadecanoic Acid,Palmitic Acid | SCN11A      | 0.8095 |
| SQ | Cetylic Acid,Hexadecanoic Acid,Palmitic Acid | SCN1A       | 0.8095 |
| SQ | Cetylic Acid,Hexadecanoic Acid,Palmitic Acid | SCN1B       | 0.8095 |
| SQ | Cetylic Acid,Hexadecanoic Acid,Palmitic Acid | SCN2A       | 0.8095 |
| SQ | Cetylic Acid,Hexadecanoic Acid,Palmitic Acid | SCN2B       | 0.8095 |
| SQ | Cetylic Acid,Hexadecanoic Acid,Palmitic Acid | SCN3A       | 0.8095 |

|    |                                                                                                                                     |         |        |
|----|-------------------------------------------------------------------------------------------------------------------------------------|---------|--------|
| SQ | Cetylic Acid,Hexadecanoic Acid,Palmitic Acid                                                                                        | SCN3B   | 0.8095 |
| SQ | Cetylic Acid,Hexadecanoic Acid,Palmitic Acid                                                                                        | SCN4A   | 0.8095 |
| SQ | Cetylic Acid,Hexadecanoic Acid,Palmitic Acid                                                                                        | SCN4B   | 0.8095 |
| SQ | Cetylic Acid,Hexadecanoic Acid,Palmitic Acid                                                                                        | SCN5A   | 0.8095 |
| SQ | Cetylic Acid,Hexadecanoic Acid,Palmitic Acid                                                                                        | SCN7A   | 0.8095 |
| SQ | Cetylic Acid,Hexadecanoic Acid,Palmitic Acid                                                                                        | SCN8A   | 0.8095 |
| SQ | Cetylic Acid,Hexadecanoic Acid,Palmitic Acid                                                                                        | SCN9A   | 0.8095 |
| SQ | Cetylic Acid,Hexadecanoic Acid,Palmitic Acid                                                                                        | SEC14L2 | 1      |
| SQ | Cetylic Acid,Hexadecanoic Acid,Palmitic Acid                                                                                        | SLC8A1  | 0.8571 |
| SQ | Cetylic Acid,Hexadecanoic Acid,Palmitic Acid                                                                                        | SREBF1  | 0.8095 |
| SQ | Cetylic Acid,Hexadecanoic Acid,Palmitic Acid                                                                                        | TLR4    | 1      |
| SQ | Cetylic Acid,Hexadecanoic Acid,Palmitic Acid                                                                                        | TM1468  | 1      |
| SQ | Cetylic Acid,Hexadecanoic Acid,Palmitic Acid                                                                                        | TRAPPC3 | 1      |
| SQ | Cetylic Acid,Hexadecanoic Acid,Palmitic Acid                                                                                        | TRPV1   | 0.8571 |
| SQ | Cetylic Acid,Hexadecanoic Acid,Palmitic Acid                                                                                        | VLDLR   | 1      |
| SQ | Alexandrin,Daucosterol,Caproic Acid,Eleutheroside A,Sitogluside,Strumaroside,Î <sup>1</sup> -Sitosterol-Î <sup>1</sup> -D-Glucoside | ANXA1   | 0.8148 |
| SQ | Alexandrin,Daucosterol,Caproic Acid,Eleutheroside A,Sitogluside,Strumaroside,Î <sup>1</sup> -Sitosterol-Î <sup>1</sup> -D-Glucoside | ATP1A1  | 0.8421 |
| SQ | Alexandrin,Daucosterol,Caproic Acid,Eleutheroside A,Sitogluside,Strumaroside,Î <sup>1</sup> -Sitosterol-Î <sup>1</sup> -D-Glucoside | ATP1A2  | 0.8246 |
| SQ | Alexandrin,Daucosterol,Caproic Acid,Eleutheroside A,Sitogluside,Strumaroside,Î <sup>1</sup> -Sitosterol-Î <sup>1</sup> -D-Glucoside | ATP1A3  | 0.8246 |
| SQ | Alexandrin,Daucosterol,Caproic Acid,Eleutheroside A,Sitogluside,Strumaroside,Î <sup>1</sup> -Sitosterol-Î <sup>1</sup> -D-Glucoside | CASP3   | 0.8333 |
| SQ | Alexandrin,Daucosterol,Caproic Acid,Eleutheroside A,Sitogluside,Strumaroside,Î <sup>1</sup> -Sitosterol-Î <sup>1</sup> -D-Glucoside | GABRB3  | 0.8596 |

|    |                                                                                                                                     |         |        |
|----|-------------------------------------------------------------------------------------------------------------------------------------|---------|--------|
| SQ | Alexandrin,Daucosterol,Caproic Acid,Eleutheroside A,Sitogluside,Strumaroside,Î <sup>2</sup> -Sitosterol-Î <sup>2</sup> -D-Glucoside | GLRA3   | 0.8596 |
| SQ | Alexandrin,Daucosterol,Caproic Acid,Eleutheroside A,Sitogluside,Strumaroside,Î <sup>2</sup> -Sitosterol-Î <sup>2</sup> -D-Glucoside | HSD11B1 | 0.8333 |
| SQ | Alexandrin,Daucosterol,Caproic Acid,Eleutheroside A,Sitogluside,Strumaroside,Î <sup>2</sup> -Sitosterol-Î <sup>2</sup> -D-Glucoside | HSD11B2 | 0.8148 |
| SQ | Alexandrin,Daucosterol,Caproic Acid,Eleutheroside A,Sitogluside,Strumaroside,Î <sup>2</sup> -Sitosterol-Î <sup>2</sup> -D-Glucoside | HSD3B1  | 0.8148 |
| SQ | Alexandrin,Daucosterol,Caproic Acid,Eleutheroside A,Sitogluside,Strumaroside,Î <sup>2</sup> -Sitosterol-Î <sup>2</sup> -D-Glucoside | LPL     | 0.8333 |
| SQ | Alexandrin,Daucosterol,Caproic Acid,Eleutheroside A,Sitogluside,Strumaroside,Î <sup>2</sup> -Sitosterol-Î <sup>2</sup> -D-Glucoside | NFKB1   | 0.8333 |
| SQ | Alexandrin,Daucosterol,Caproic Acid,Eleutheroside A,Sitogluside,Strumaroside,Î <sup>2</sup> -Sitosterol-Î <sup>2</sup> -D-Glucoside | NFKB2   | 0.8333 |
| SQ | Alexandrin,Daucosterol,Caproic Acid,Eleutheroside A,Sitogluside,Strumaroside,Î <sup>2</sup> -Sitosterol-Î <sup>2</sup> -D-Glucoside | NR3C1   | 0.8148 |
| SQ | Alexandrin,Daucosterol,Caproic Acid,Eleutheroside A,Sitogluside,Strumaroside,Î <sup>2</sup> -Sitosterol-Î <sup>2</sup> -D-Glucoside | PPP1CC  | 0.8036 |
| SQ | Alexandrin,Daucosterol,Caproic Acid,Eleutheroside A,Sitogluside,Strumaroside,Î <sup>2</sup> -Sitosterol-Î <sup>2</sup> -D-Glucoside | SLCO1B3 | 0.9074 |
| SQ | Alexandrin,Daucosterol,Caproic Acid,Eleutheroside A,Sitogluside,Strumaroside,Î <sup>2</sup> -Sitosterol-Î <sup>2</sup> -D-Glucoside | TNF     | 0.8333 |
| SQ | Alexandrin,Daucosterol,Caproic Acid,Eleutheroside A,Sitogluside,Strumaroside,Î <sup>2</sup> -Sitosterol-Î <sup>2</sup> -D-Glucoside | VDR     | 0.8148 |
| SQ | Alexandrin,Daucosterol,Caproic Acid,Eleutheroside A,Sitogluside,Strumaroside,Î <sup>2</sup> -Sitosterol-Î <sup>2</sup> -D-Glucoside | YWHAE   | 0.8103 |
| SQ | Enanthic Acid                                                                                                                       | ABAT    | 0.8095 |
| SQ | Enanthic Acid                                                                                                                       | ABL1    | 1      |
| SQ | Enanthic Acid                                                                                                                       | ACADSB  | 0.8095 |

|    |               |             |        |
|----|---------------|-------------|--------|
| SQ | Enanthic Acid | ACOX1       | 0.8    |
| SQ | Enanthic Acid | ACSL3       | 0.8571 |
| SQ | Enanthic Acid | ACSL4       | 0.8571 |
| SQ | Enanthic Acid | ADH5        | 1      |
| SQ | Enanthic Acid | ALDH5A1     | 0.8095 |
| SQ | Enanthic Acid | ARF1        | 1      |
| SQ | Enanthic Acid | ARF6        | 1      |
| SQ | Enanthic Acid | C8G         | 1      |
| SQ | Enanthic Acid | CALM1       | 1      |
| SQ | Enanthic Acid | CNR1        | 0.8333 |
| SQ | Enanthic Acid | CNR2        | 0.8333 |
| SQ | Enanthic Acid | CYP2C8      | 1      |
| SQ | Enanthic Acid | ECI2        | 1      |
| SQ | Enanthic Acid | ELOVL4      | 0.8571 |
| SQ | Enanthic Acid | FADS1       | 0.8571 |
| SQ | Enanthic Acid | FADS2       | 0.8571 |
| SQ | Enanthic Acid | FFAR1       | 0.8571 |
| SQ | Enanthic Acid | FKBP1A      | 1      |
| SQ | Enanthic Acid | FURIN       | 1      |
| SQ | Enanthic Acid | GLTP        | 1      |
| SQ | Enanthic Acid | GM2A        | 1      |
| SQ | Enanthic Acid | GUCA1A      | 1      |
| SQ | Enanthic Acid | HAO1        | 0.8    |
| SQ | Enanthic Acid | HDAC2       | 0.8095 |
| SQ | Enanthic Acid | HDAC9       | 0.8095 |
| SQ | Enanthic Acid | HNF4A       | 1      |
| SQ | Enanthic Acid | HNF4G       | 1      |
| SQ | Enanthic Acid | INS         | 1      |
| SQ | Enanthic Acid | LALBA       | 1      |
| SQ | Enanthic Acid | LIP3        | 1      |
| SQ | Enanthic Acid | LTB4R       | 0.8    |
| SQ | Enanthic Acid | LTB4R2      | 0.8    |
| SQ | Enanthic Acid | LTF         | 1      |
| SQ | Enanthic Acid | LY96        | 1      |
| SQ | Enanthic Acid | NCOA1       | 1      |
| SQ | Enanthic Acid | NR1H4       | 0.9524 |
| SQ | Enanthic Acid | OGDH        | 0.8095 |
| SQ | Enanthic Acid | PAEP        | 1      |
| SQ | Enanthic Acid | PKIA        | 1      |
| SQ | Enanthic Acid | PLA2G1B     | 1      |
| SQ | Enanthic Acid | PLA2G2A     | 1      |
| SQ | Enanthic Acid | PLA2G2D     | 1      |
| SQ | Enanthic Acid | PLA2G2E     | 1      |
| SQ | Enanthic Acid | PMP2        | 1      |
| SQ | Enanthic Acid | PPARA       | 1      |
| SQ | Enanthic Acid | PPARD       | 0.9524 |
| SQ | Enanthic Acid | PPARG       | 1      |
| SQ | Enanthic Acid | PPA_RS05235 | 0.9524 |
| SQ | Enanthic Acid | PPP3CA      | 1      |
| SQ | Enanthic Acid | PPP3R1      | 1      |
| SQ | Enanthic Acid | PPT1        | 1      |
| SQ | Enanthic Acid | PRKACA      | 1      |
| SQ | Enanthic Acid | PTGS1       | 0.9524 |
| SQ | Enanthic Acid | PTGS2       | 0.9524 |
| SQ | Enanthic Acid | PVR         | 1      |

|    |               |         |        |
|----|---------------|---------|--------|
| SQ | Enanthic Acid | RCVRN   | 1      |
| SQ | Enanthic Acid | RHO     | 1      |
| SQ | Enanthic Acid | RXRA    | 0.9524 |
| SQ | Enanthic Acid | RXRB    | 0.8095 |
| SQ | Enanthic Acid | RXRG    | 0.8095 |
| SQ | Enanthic Acid | S100B   | 0.8571 |
| SQ | Enanthic Acid | SCN10A  | 0.8095 |
| SQ | Enanthic Acid | SCN11A  | 0.8095 |
| SQ | Enanthic Acid | SCN1A   | 0.8095 |
| SQ | Enanthic Acid | SCN1B   | 0.8095 |
| SQ | Enanthic Acid | SCN2A   | 0.8095 |
| SQ | Enanthic Acid | SCN2B   | 0.8095 |
| SQ | Enanthic Acid | SCN3A   | 0.8095 |
| SQ | Enanthic Acid | SCN3B   | 0.8095 |
| SQ | Enanthic Acid | SCN4A   | 0.8095 |
| SQ | Enanthic Acid | SCN4B   | 0.8095 |
| SQ | Enanthic Acid | SCN5A   | 0.8095 |
| SQ | Enanthic Acid | SCN7A   | 0.8095 |
| SQ | Enanthic Acid | SCN8A   | 0.8095 |
| SQ | Enanthic Acid | SCN9A   | 0.8095 |
| SQ | Enanthic Acid | SEC14L2 | 1      |
| SQ | Enanthic Acid | SLC8A1  | 0.8571 |
| SQ | Enanthic Acid | SREBF1  | 0.8095 |
| SQ | Enanthic Acid | TLR4    | 1      |
| SQ | Enanthic Acid | TM1468  | 1      |
| SQ | Enanthic Acid | TRAPPC3 | 1      |
| SQ | Enanthic Acid | TRPV1   | 0.8571 |
| SQ | Enanthic Acid | VLDLR   | 1      |
| SQ | Nonanoic Acid | ABAT    | 0.8095 |
| SQ | Nonanoic Acid | ABL1    | 1      |
| SQ | Nonanoic Acid | ACADSB  | 0.8095 |
| SQ | Nonanoic Acid | ACOX1   | 0.8    |
| SQ | Nonanoic Acid | ACSL3   | 0.8571 |
| SQ | Nonanoic Acid | ACSL4   | 0.8571 |
| SQ | Nonanoic Acid | ADH5    | 1      |
| SQ | Nonanoic Acid | ALDH5A1 | 0.8095 |
| SQ | Nonanoic Acid | ARF1    | 1      |
| SQ | Nonanoic Acid | ARF6    | 1      |
| SQ | Nonanoic Acid | C8G     | 1      |
| SQ | Nonanoic Acid | CALM1   | 1      |
| SQ | Nonanoic Acid | CNR1    | 0.8333 |
| SQ | Nonanoic Acid | CNR2    | 0.8333 |
| SQ | Nonanoic Acid | CYP2C8  | 1      |
| SQ | Nonanoic Acid | ECI2    | 1      |
| SQ | Nonanoic Acid | ELOVL4  | 0.8571 |
| SQ | Nonanoic Acid | FADS1   | 0.8571 |
| SQ | Nonanoic Acid | FADS2   | 0.8571 |
| SQ | Nonanoic Acid | FFAR1   | 0.8571 |
| SQ | Nonanoic Acid | FKBP1A  | 1      |
| SQ | Nonanoic Acid | FURIN   | 1      |
| SQ | Nonanoic Acid | GLTP    | 1      |
| SQ | Nonanoic Acid | GM2A    | 1      |
| SQ | Nonanoic Acid | GUCA1A  | 1      |
| SQ | Nonanoic Acid | HAO1    | 0.8    |
| SQ | Nonanoic Acid | HDAC2   | 0.8095 |

|    |               |             |        |
|----|---------------|-------------|--------|
| SQ | Nonanoic Acid | HDAC9       | 0.8095 |
| SQ | Nonanoic Acid | HNF4A       | 1      |
| SQ | Nonanoic Acid | HNF4G       | 1      |
| SQ | Nonanoic Acid | INS         | 1      |
| SQ | Nonanoic Acid | LALBA       | 1      |
| SQ | Nonanoic Acid | LIP3        | 1      |
| SQ | Nonanoic Acid | LTB4R       | 0.8    |
| SQ | Nonanoic Acid | LTB4R2      | 0.8    |
| SQ | Nonanoic Acid | LTF         | 1      |
| SQ | Nonanoic Acid | LY96        | 1      |
| SQ | Nonanoic Acid | NCOA1       | 1      |
| SQ | Nonanoic Acid | NR1H4       | 0.9524 |
| SQ | Nonanoic Acid | OGDH        | 0.8095 |
| SQ | Nonanoic Acid | PAEP        | 1      |
| SQ | Nonanoic Acid | PKIA        | 1      |
| SQ | Nonanoic Acid | PLA2G1B     | 1      |
| SQ | Nonanoic Acid | PLA2G2A     | 1      |
| SQ | Nonanoic Acid | PLA2G2D     | 1      |
| SQ | Nonanoic Acid | PLA2G2E     | 1      |
| SQ | Nonanoic Acid | PMP2        | 1      |
| SQ | Nonanoic Acid | PPARA       | 1      |
| SQ | Nonanoic Acid | PPARD       | 0.9524 |
| SQ | Nonanoic Acid | PPARG       | 1      |
| SQ | Nonanoic Acid | PPA_RS05235 | 0.9524 |
| SQ | Nonanoic Acid | PPP3CA      | 1      |
| SQ | Nonanoic Acid | PPP3R1      | 1      |
| SQ | Nonanoic Acid | PPT1        | 1      |
| SQ | Nonanoic Acid | PRKACA      | 1      |
| SQ | Nonanoic Acid | PTGS1       | 0.9524 |
| SQ | Nonanoic Acid | PTGS2       | 0.9524 |
| SQ | Nonanoic Acid | PVR         | 1      |
| SQ | Nonanoic Acid | RCVRN       | 1      |
| SQ | Nonanoic Acid | RHO         | 1      |
| SQ | Nonanoic Acid | RXRA        | 0.9524 |
| SQ | Nonanoic Acid | RXRB        | 0.8095 |
| SQ | Nonanoic Acid | RXRG        | 0.8095 |
| SQ | Nonanoic Acid | S100B       | 0.8571 |
| SQ | Nonanoic Acid | SCN10A      | 0.8095 |
| SQ | Nonanoic Acid | SCN11A      | 0.8095 |
| SQ | Nonanoic Acid | SCN1A       | 0.8095 |
| SQ | Nonanoic Acid | SCN1B       | 0.8095 |
| SQ | Nonanoic Acid | SCN2A       | 0.8095 |
| SQ | Nonanoic Acid | SCN2B       | 0.8095 |
| SQ | Nonanoic Acid | SCN3A       | 0.8095 |
| SQ | Nonanoic Acid | SCN3B       | 0.8095 |
| SQ | Nonanoic Acid | SCN4A       | 0.8095 |
| SQ | Nonanoic Acid | SCN4B       | 0.8095 |
| SQ | Nonanoic Acid | SCN5A       | 0.8095 |
| SQ | Nonanoic Acid | SCN7A       | 0.8095 |
| SQ | Nonanoic Acid | SCN8A       | 0.8095 |
| SQ | Nonanoic Acid | SCN9A       | 0.8095 |
| SQ | Nonanoic Acid | SEC14L2     | 1      |
| SQ | Nonanoic Acid | SLC8A1      | 0.8571 |
| SQ | Nonanoic Acid | SREBF1      | 0.8095 |
| SQ | Nonanoic Acid | TLR4        | 1      |

|    |                                      |         |        |
|----|--------------------------------------|---------|--------|
| SQ | Nonanoic Acid                        | TM1468  | 1      |
| SQ | Nonanoic Acid                        | TRAPPC3 | 1      |
| SQ | Nonanoic Acid                        | TRPV1   | 0.8571 |
| SQ | Nonanoic Acid                        | VLDLR   | 1      |
| SQ | Methyl Hexadecanate,Methyl Palmitate | IGHG1   | 1      |
| SQ | Methyl Hexadecanate,Methyl Palmitate | LCN2    | 1      |
| SQ | Heneicosanoic Acid                   | ABAT    | 0.8095 |
| SQ | Heneicosanoic Acid                   | ABL1    | 1      |
| SQ | Heneicosanoic Acid                   | ACADSB  | 0.8095 |
| SQ | Heneicosanoic Acid                   | ACOX1   | 0.8    |
| SQ | Heneicosanoic Acid                   | ACSL3   | 0.8571 |
| SQ | Heneicosanoic Acid                   | ACSL4   | 0.8571 |
| SQ | Heneicosanoic Acid                   | ADH5    | 1      |
| SQ | Heneicosanoic Acid                   | ALDH5A1 | 0.8095 |
| SQ | Heneicosanoic Acid                   | ARF1    | 1      |
| SQ | Heneicosanoic Acid                   | ARF6    | 1      |
| SQ | Heneicosanoic Acid                   | C8G     | 1      |
| SQ | Heneicosanoic Acid                   | CALM1   | 1      |
| SQ | Heneicosanoic Acid                   | CNR1    | 0.8333 |
| SQ | Heneicosanoic Acid                   | CNR2    | 0.8333 |
| SQ | Heneicosanoic Acid                   | CYP2C8  | 1      |
| SQ | Heneicosanoic Acid                   | ECI2    | 1      |
| SQ | Heneicosanoic Acid                   | ELOVL4  | 0.8571 |
| SQ | Heneicosanoic Acid                   | FADS1   | 0.8571 |
| SQ | Heneicosanoic Acid                   | FADS2   | 0.8571 |
| SQ | Heneicosanoic Acid                   | FFAR1   | 0.8571 |
| SQ | Heneicosanoic Acid                   | FKBP1A  | 1      |
| SQ | Heneicosanoic Acid                   | FURIN   | 1      |
| SQ | Heneicosanoic Acid                   | GLTP    | 1      |
| SQ | Heneicosanoic Acid                   | GM2A    | 1      |
| SQ | Heneicosanoic Acid                   | GUCA1A  | 1      |
| SQ | Heneicosanoic Acid                   | HAO1    | 0.8    |
| SQ | Heneicosanoic Acid                   | HDAC2   | 0.8095 |
| SQ | Heneicosanoic Acid                   | HDAC9   | 0.8095 |
| SQ | Heneicosanoic Acid                   | HNF4A   | 1      |
| SQ | Heneicosanoic Acid                   | HNF4G   | 1      |
| SQ | Heneicosanoic Acid                   | INS     | 1      |
| SQ | Heneicosanoic Acid                   | LALBA   | 1      |
| SQ | Heneicosanoic Acid                   | LIP3    | 1      |
| SQ | Heneicosanoic Acid                   | LTB4R   | 0.8    |
| SQ | Heneicosanoic Acid                   | LTB4R2  | 0.8    |
| SQ | Heneicosanoic Acid                   | LTF     | 1      |
| SQ | Heneicosanoic Acid                   | LY96    | 1      |
| SQ | Heneicosanoic Acid                   | NCOA1   | 1      |
| SQ | Heneicosanoic Acid                   | NR1H4   | 0.9524 |
| SQ | Heneicosanoic Acid                   | OGDH    | 0.8095 |
| SQ | Heneicosanoic Acid                   | PAEP    | 1      |
| SQ | Heneicosanoic Acid                   | PKIA    | 1      |
| SQ | Heneicosanoic Acid                   | PLA2G1B | 1      |
| SQ | Heneicosanoic Acid                   | PLA2G2A | 1      |
| SQ | Heneicosanoic Acid                   | PLA2G2D | 1      |
| SQ | Heneicosanoic Acid                   | PLA2G2E | 1      |
| SQ | Heneicosanoic Acid                   | PMP2    | 1      |



|    |                                 |             |        |
|----|---------------------------------|-------------|--------|
| SQ | Heneicosanoic Acid              | PPARA       | 1      |
| SQ | Heneicosanoic Acid              | PPARD       | 0.9524 |
| SQ | Heneicosanoic Acid              | PPARG       | 1      |
| SQ | Heneicosanoic Acid              | PPA_RS05235 | 0.9524 |
| SQ | Heneicosanoic Acid              | PPP3CA      | 1      |
| SQ | Heneicosanoic Acid              | PPP3R1      | 1      |
| SQ | Heneicosanoic Acid              | PPT1        | 1      |
| SQ | Heneicosanoic Acid              | PRKACA      | 1      |
| SQ | Heneicosanoic Acid              | PTGS1       | 0.9524 |
| SQ | Heneicosanoic Acid              | PTGS2       | 0.9524 |
| SQ | Heneicosanoic Acid              | PVR         | 1      |
| SQ | Heneicosanoic Acid              | RCVRN       | 1      |
| SQ | Heneicosanoic Acid              | RHO         | 1      |
| SQ | Heneicosanoic Acid              | RXRA        | 0.9524 |
| SQ | Heneicosanoic Acid              | RXRB        | 0.8095 |
| SQ | Heneicosanoic Acid              | RXRG        | 0.8095 |
| SQ | Heneicosanoic Acid              | S100B       | 0.8571 |
| SQ | Heneicosanoic Acid              | SCN10A      | 0.8095 |
| SQ | Heneicosanoic Acid              | SCN11A      | 0.8095 |
| SQ | Heneicosanoic Acid              | SCN1A       | 0.8095 |
| SQ | Heneicosanoic Acid              | SCN1B       | 0.8095 |
| SQ | Heneicosanoic Acid              | SCN2A       | 0.8095 |
| SQ | Heneicosanoic Acid              | SCN2B       | 0.8095 |
| SQ | Heneicosanoic Acid              | SCN3A       | 0.8095 |
| SQ | Heneicosanoic Acid              | SCN3B       | 0.8095 |
| SQ | Heneicosanoic Acid              | SCN4A       | 0.8095 |
| SQ | Heneicosanoic Acid              | SCN4B       | 0.8095 |
| SQ | Heneicosanoic Acid              | SCN5A       | 0.8095 |
| SQ | Heneicosanoic Acid              | SCN7A       | 0.8095 |
| SQ | Heneicosanoic Acid              | SCN8A       | 0.8095 |
| SQ | Heneicosanoic Acid              | SCN9A       | 0.8095 |
| SQ | Heneicosanoic Acid              | SEC14L2     | 1      |
| SQ | Heneicosanoic Acid              | SLC8A1      | 0.8571 |
| SQ | Heneicosanoic Acid              | SREBF1      | 0.8095 |
| SQ | Heneicosanoic Acid              | TLR4        | 1      |
| SQ | Heneicosanoic Acid              | TM1468      | 1      |
| SQ | Heneicosanoic Acid              | TRAPPC3     | 1      |
| SQ | Heneicosanoic Acid              | TRPV1       | 0.8571 |
| SQ | Heneicosanoic Acid              | VLDLR       | 1      |
| SQ | 2,6-Ditertbutyl-4-Methyl Phenol | ATP2A1      | 0.9    |
| SQ | 2,6-Ditertbutyl-4-Methyl Phenol | GABRA1      | 0.8889 |
| SQ | 2,6-Ditertbutyl-4-Methyl Phenol | GABRA2      | 0.8889 |
| SQ | 2,6-Ditertbutyl-4-Methyl Phenol | GABRA3      | 0.8889 |
| SQ | 2,6-Ditertbutyl-4-Methyl Phenol | GABRA4      | 0.8889 |
| SQ | 2,6-Ditertbutyl-4-Methyl Phenol | GABRA5      | 0.8889 |
| SQ | 2,6-Ditertbutyl-4-Methyl Phenol | GABRA6      | 0.8889 |
| SQ | 2,6-Ditertbutyl-4-Methyl Phenol | GABRB1      | 0.8889 |

|    |                                 |         |        |
|----|---------------------------------|---------|--------|
| SQ | 2,6-Ditertbutyl-4-Methyl Phenol | GABRB2  | 0.8889 |
| SQ | 2,6-Ditertbutyl-4-Methyl Phenol | GABRB3  | 0.8889 |
| SQ | 2,6-Ditertbutyl-4-Methyl Phenol | GABRD   | 0.8889 |
| SQ | 2,6-Ditertbutyl-4-Methyl Phenol | GABRE   | 0.8889 |
| SQ | 2,6-Ditertbutyl-4-Methyl Phenol | GABRG1  | 0.8889 |
| SQ | 2,6-Ditertbutyl-4-Methyl Phenol | GABRG2  | 0.8889 |
| SQ | 2,6-Ditertbutyl-4-Methyl Phenol | GABRG3  | 0.8889 |
| SQ | 2,6-Ditertbutyl-4-Methyl Phenol | GABRP   | 0.8889 |
| SQ | 2,6-Ditertbutyl-4-Methyl Phenol | GABRQ   | 0.8889 |
| SQ | 2,6-Ditertbutyl-4-Methyl Phenol | HA      | 0.9    |
| SQ | 2,6-Ditertbutyl-4-Methyl Phenol | SCN2A   | 0.8889 |
| SQ | 2,6-Ditertbutyl-4-Methyl Phenol | SCN4A   | 0.8889 |
| SQ | Ginsenoside Rb1                 | ATP1A1  | 0.9273 |
| SQ | Ginsenoside Rb1                 | ATP1A2  | 0.9091 |
| SQ | Ginsenoside Rb1                 | ATP1A3  | 0.9091 |
| SQ | Ginsenoside Rb1                 | CASP3   | 0.8182 |
| SQ | Ginsenoside Rb1                 | GABRB3  | 0.8448 |
| SQ | Ginsenoside Rb1                 | GLRA3   | 0.8448 |
| SQ | Ginsenoside Rb1                 | HSD11B1 | 0.8182 |
| SQ | Ginsenoside Rb1                 | IL1B    | 0.8364 |
| SQ | Ginsenoside Rb1                 | IL6     | 0.8364 |
| SQ | Ginsenoside Rb1                 | LPL     | 0.8182 |
| SQ | Ginsenoside Rb1                 | NFKB1   | 0.8364 |
| SQ | Ginsenoside Rb1                 | NFKB2   | 0.8364 |
| SQ | Ginsenoside Rb1                 | NR3C1   | 0.8214 |
| SQ | Ginsenoside Rb1                 | PPP1CC  | 0.8545 |
| SQ | Ginsenoside Rb1                 | SLCO1B3 | 1      |
| SQ | Ginsenoside Rb1                 | TNF     | 0.8364 |
| SQ | Ginsenoside Rb1                 | VDR     | 0.8679 |
| SQ | Ginsenoside Rb1                 | YWHAE   | 0.8276 |
| SQ | Ginsenoside Rc                  | ATP1A1  | 0.9455 |
| SQ | Ginsenoside Rc                  | ATP1A2  | 0.9273 |
| SQ | Ginsenoside Rc                  | ATP1A3  | 0.9273 |
| SQ | Ginsenoside Rc                  | CASP3   | 0.8036 |
| SQ | Ginsenoside Rc                  | GABRB3  | 0.8621 |
| SQ | Ginsenoside Rc                  | GLRA3   | 0.8621 |
| SQ | Ginsenoside Rc                  | HSD11B1 | 0.8036 |
| SQ | Ginsenoside Rc                  | IL1B    | 0.8545 |
| SQ | Ginsenoside Rc                  | IL6     | 0.8545 |
| SQ | Ginsenoside Rc                  | LPL     | 0.8036 |
| SQ | Ginsenoside Rc                  | NFKB1   | 0.8545 |
| SQ | Ginsenoside Rc                  | NFKB2   | 0.8545 |
| SQ | Ginsenoside Rc                  | NR3C1   | 0.8393 |

|    |                    |         |        |
|----|--------------------|---------|--------|
| SQ | Ginsenoside Rc     | PPP1CC  | 0.8727 |
| SQ | Ginsenoside Rc     | SLCO1B3 | 0.9811 |
| SQ | Ginsenoside Rc     | TNF     | 0.8545 |
| SQ | Ginsenoside Rc     | VDR     | 0.8519 |
| SQ | Ginsenoside Rc     | YWHAE   | 0.8136 |
| SQ | Ginsenoside Rg1    | ATP1A1  | 0.9273 |
| SQ | Ginsenoside Rg1    | ATP1A2  | 0.9091 |
| SQ | Ginsenoside Rg1    | ATP1A3  | 0.9091 |
| SQ | Ginsenoside Rg1    | CASP3   | 0.8182 |
| SQ | Ginsenoside Rg1    | GABRB3  | 0.8448 |
| SQ | Ginsenoside Rg1    | GLRA3   | 0.8448 |
| SQ | Ginsenoside Rg1    | HSD11B1 | 0.8182 |
| SQ | Ginsenoside Rg1    | IL1B    | 0.8364 |
| SQ | Ginsenoside Rg1    | IL6     | 0.8364 |
| SQ | Ginsenoside Rg1    | LPL     | 0.8182 |
| SQ | Ginsenoside Rg1    | NFKB1   | 0.8364 |
| SQ | Ginsenoside Rg1    | NFKB2   | 0.8364 |
| SQ | Ginsenoside Rg1    | NR3C1   | 0.8214 |
| SQ | Ginsenoside Rg1    | PPP1CC  | 0.8545 |
| SQ | Ginsenoside Rg1    | SLCO1B3 | 1      |
| SQ | Ginsenoside Rg1    | TNF     | 0.8364 |
| SQ | Ginsenoside Rg1    | VDR     | 0.8679 |
| SQ | Ginsenoside Rg1    | YWHAE   | 0.8276 |
| SQ | Ginsenoside-Rh1    | ANXA1   | 0.8113 |
| SQ | Ginsenoside-Rh1    | ATP1A1  | 0.8909 |
| SQ | Ginsenoside-Rh1    | ATP1A2  | 0.8727 |
| SQ | Ginsenoside-Rh1    | ATP1A3  | 0.8727 |
| SQ | Ginsenoside-Rh1    | CASP3   | 0.8148 |
| SQ | Ginsenoside-Rh1    | GABRB3  | 0.8103 |
| SQ | Ginsenoside-Rh1    | GLRA3   | 0.8103 |
| SQ | Ginsenoside-Rh1    | HSD11B1 | 0.8148 |
| SQ | Ginsenoside-Rh1    | HSD11B2 | 0.8113 |
| SQ | Ginsenoside-Rh1    | HSD3B1  | 0.8113 |
| SQ | Ginsenoside-Rh1    | IL1B    | 0.8333 |
| SQ | Ginsenoside-Rh1    | IL6     | 0.8333 |
| SQ | Ginsenoside-Rh1    | LPL     | 0.8148 |
| SQ | Ginsenoside-Rh1    | NFKB1   | 0.8333 |
| SQ | Ginsenoside-Rh1    | NFKB2   | 0.8333 |
| SQ | Ginsenoside-Rh1    | NR3C1   | 0.8182 |
| SQ | Ginsenoside-Rh1    | PPP1CC  | 0.8519 |
| SQ | Ginsenoside-Rh1    | SLCO1B3 | 0.9615 |
| SQ | Ginsenoside-Rh1    | TNF     | 0.8333 |
| SQ | Ginsenoside-Rh1    | VDR     | 0.8654 |
| SQ | Ginsenoside-Rh1    | YWHAE   | 0.8246 |
| SQ | Notoginsenoside R1 | ATP1A1  | 0.9273 |
| SQ | Notoginsenoside R1 | ATP1A2  | 0.9091 |
| SQ | Notoginsenoside R1 | ATP1A3  | 0.9091 |
| SQ | Notoginsenoside R1 | CASP3   | 0.8182 |
| SQ | Notoginsenoside R1 | GABRB3  | 0.8448 |
| SQ | Notoginsenoside R1 | GLRA3   | 0.8448 |
| SQ | Notoginsenoside R1 | HSD11B1 | 0.8182 |
| SQ | Notoginsenoside R1 | IL1B    | 0.8364 |
| SQ | Notoginsenoside R1 | IL6     | 0.8364 |
| SQ | Notoginsenoside R1 | LPL     | 0.8182 |
| SQ | Notoginsenoside R1 | NFKB1   | 0.8364 |

|    |                                                                                                                         |         |        |
|----|-------------------------------------------------------------------------------------------------------------------------|---------|--------|
| SQ | Notoginsenoside R1                                                                                                      | NFKB2   | 0.8364 |
| SQ | Notoginsenoside R1                                                                                                      | NR3C1   | 0.8214 |
| SQ | Notoginsenoside R1                                                                                                      | PPP1CC  | 0.8545 |
| SQ | Notoginsenoside R1                                                                                                      | SLCO1B3 | 1      |
| SQ | Notoginsenoside R1                                                                                                      | TNF     | 0.8364 |
| SQ | Notoginsenoside R1                                                                                                      | VDR     | 0.8679 |
| SQ | Notoginsenoside R1                                                                                                      | YWHAE   | 0.8276 |
| SQ | Notoginsenoside R4                                                                                                      | ATP1A1  | 0.9273 |
| SQ | Notoginsenoside R4                                                                                                      | ATP1A2  | 0.9091 |
| SQ | Notoginsenoside R4                                                                                                      | ATP1A3  | 0.9091 |
| SQ | Notoginsenoside R4                                                                                                      | CASP3   | 0.8182 |
| SQ | Notoginsenoside R4                                                                                                      | GABRB3  | 0.8448 |
| SQ | Notoginsenoside R4                                                                                                      | GLRA3   | 0.8448 |
| SQ | Notoginsenoside R4                                                                                                      | HSD11B1 | 0.8182 |
| SQ | Notoginsenoside R4                                                                                                      | IL1B    | 0.8364 |
| SQ | Notoginsenoside R4                                                                                                      | IL6     | 0.8364 |
| SQ | Notoginsenoside R4                                                                                                      | LPL     | 0.8182 |
| SQ | Notoginsenoside R4                                                                                                      | NFKB1   | 0.8364 |
| SQ | Notoginsenoside R4                                                                                                      | NFKB2   | 0.8364 |
| SQ | Notoginsenoside R4                                                                                                      | NR3C1   | 0.8214 |
| SQ | Notoginsenoside R4                                                                                                      | PPP1CC  | 0.8545 |
| SQ | Notoginsenoside R4                                                                                                      | SLCO1B3 | 1      |
| SQ | Notoginsenoside R4                                                                                                      | TNF     | 0.8364 |
| SQ | Notoginsenoside R4                                                                                                      | VDR     | 0.8679 |
| SQ | Notoginsenoside R4                                                                                                      | YWHAE   | 0.8276 |
| SQ | Panaxytriol                                                                                                             | HAO1    | 0.8214 |
| SQ | 3-Ene-Nonanone-2                                                                                                        | ACOT13  | 0.8125 |
| SQ | 3Î'-O-Î'-D-Glucopyranosyl-20-O-[Î'-L-Arabinopyranosyl(1â†'2)-Î'-D-Glucopyranosyl]3Î',12Î',20(S)-Trihydroxydammar-24-Ene | ATP1A1  | 0.9273 |
| SQ | 3Î'-O-Î'-D-Glucopyranosyl-20-O-[Î'-L-Arabinopyranosyl(1â†'2)-Î'-D-Glucopyranosyl]3Î',12Î',20(S)-Trihydroxydammar-24-Ene | ATP1A2  | 0.9091 |
| SQ | 3Î'-O-Î'-D-Glucopyranosyl-20-O-[Î'-L-Arabinopyranosyl(1â†'2)-Î'-D-Glucopyranosyl]3Î',12Î',20(S)-Trihydroxydammar-24-Ene | ATP1A3  | 0.9091 |
| SQ | 3Î'-O-Î'-D-Glucopyranosyl-20-O-[Î'-L-Arabinopyranosyl(1â†'2)-Î'-D-Glucopyranosyl]3Î',12Î',20(S)-Trihydroxydammar-24-Ene | CASP3   | 0.8182 |
| SQ | 3Î'-O-Î'-D-Glucopyranosyl-20-O-[Î'-L-Arabinopyranosyl(1â†'2)-Î'-D-Glucopyranosyl]3Î',12Î',20(S)-Trihydroxydammar-24-Ene | GABRB3  | 0.8448 |

|    |                                                                                                                         |         |        |
|----|-------------------------------------------------------------------------------------------------------------------------|---------|--------|
| SQ | 3I'-O-I'-D-Glucopyranosyl-20-O-[I'-L-Arabinopyranosyl(1â†'2)-Î'-D-Glucopyranosyl]3Î',12Î',20(S)-Trihydroxydammar-24-Ene | GLRA3   | 0.8448 |
| SQ | 3I'-O-I'-D-Glucopyranosyl-20-O-[I'-L-Arabinopyranosyl(1â†'2)-Î'-D-Glucopyranosyl]3Î',12Î',20(S)-Trihydroxydammar-24-Ene | HSD11B1 | 0.8182 |
| SQ | 3I'-O-I'-D-Glucopyranosyl-20-O-[I'-L-Arabinopyranosyl(1â†'2)-Î'-D-Glucopyranosyl]3Î',12Î',20(S)-Trihydroxydammar-24-Ene | IL1B    | 0.8364 |
| SQ | 3I'-O-I'-D-Glucopyranosyl-20-O-[I'-L-Arabinopyranosyl(1â†'2)-Î'-D-Glucopyranosyl]3Î',12Î',20(S)-Trihydroxydammar-24-Ene | IL6     | 0.8364 |
| SQ | 3I'-O-I'-D-Glucopyranosyl-20-O-[I'-L-Arabinopyranosyl(1â†'2)-Î'-D-Glucopyranosyl]3Î',12Î',20(S)-Trihydroxydammar-24-Ene | LPL     | 0.8182 |
| SQ | 3I'-O-I'-D-Glucopyranosyl-20-O-[I'-L-Arabinopyranosyl(1â†'2)-Î'-D-Glucopyranosyl]3Î',12Î',20(S)-Trihydroxydammar-24-Ene | NFKB1   | 0.8364 |
| SQ | 3I'-O-I'-D-Glucopyranosyl-20-O-[I'-L-Arabinopyranosyl(1â†'2)-Î'-D-Glucopyranosyl]3Î',12Î',20(S)-Trihydroxydammar-24-Ene | NFKB2   | 0.8364 |
| SQ | 3I'-O-I'-D-Glucopyranosyl-20-O-[I'-L-Arabinopyranosyl(1â†'2)-Î'-D-Glucopyranosyl]3Î',12Î',20(S)-Trihydroxydammar-24-Ene | NR3C1   | 0.8214 |
| SQ | 3I'-O-I'-D-Glucopyranosyl-20-O-[I'-L-Arabinopyranosyl(1â†'2)-Î'-D-Glucopyranosyl]3Î',12Î',20(S)-Trihydroxydammar-24-Ene | PPP1CC  | 0.8545 |
| SQ | 3I'-O-I'-D-Glucopyranosyl-20-O-[I'-L-Arabinopyranosyl(1â†'2)-Î'-D-Glucopyranosyl]3Î',12Î',20(S)-Trihydroxydammar-24-Ene | SLCO1B3 | 1      |
| SQ | 3I'-O-I'-D-Glucopyranosyl-20-O-[I'-L-Arabinopyranosyl(1â†'2)-Î'-D-Glucopyranosyl]3Î',12Î',20(S)-Trihydroxydammar-24-Ene | TNF     | 0.8364 |

|    |                                                                                                                         |         |        |
|----|-------------------------------------------------------------------------------------------------------------------------|---------|--------|
| SQ | 3Î'-O-Î'-D-Glucopyranosyl-20-O-[Î'-L-Arabinopyranosyl(1â†'2)-Î'-D-Glucopyranosyl]3Î',12Î',20(S)-Trihydroxydammar-24-Ene | VDR     | 0.8679 |
| SQ | 3Î'-O-Î'-D-Glucopyranosyl-20-O-[Î'-L-Arabinopyranosyl(1â†'2)-Î'-D-Glucopyranosyl]3Î',12Î',20(S)-Trihydroxydammar-24-Ene | YWHAE   | 0.8276 |
| SQ | 3-O-[Î'-D-Glucopyranosyl(1â†'6)-Î'-D-Glucopyranosyl]-20-O-Î'-D-Glucopyranosyl-3Î',12Î',20(S)-Trihydroxydammar-24-Ene    | ATP1A1  | 0.9273 |
| SQ | 3-O-[Î'-D-Glucopyranosyl(1â†'6)-Î'-D-Glucopyranosyl]-20-O-Î'-D-Glucopyranosyl-3Î',12Î',20(S)-Trihydroxydammar-24-Ene    | ATP1A2  | 0.9091 |
| SQ | 3-O-[Î'-D-Glucopyranosyl(1â†'6)-Î'-D-Glucopyranosyl]-20-O-Î'-D-Glucopyranosyl-3Î',12Î',20(S)-Trihydroxydammar-24-Ene    | ATP1A3  | 0.9091 |
| SQ | 3-O-[Î'-D-Glucopyranosyl(1â†'6)-Î'-D-Glucopyranosyl]-20-O-Î'-D-Glucopyranosyl-3Î',12Î',20(S)-Trihydroxydammar-24-Ene    | CASP3   | 0.8182 |
| SQ | 3-O-[Î'-D-Glucopyranosyl(1â†'6)-Î'-D-Glucopyranosyl]-20-O-Î'-D-Glucopyranosyl-3Î',12Î',20(S)-Trihydroxydammar-24-Ene    | GABRB3  | 0.8448 |
| SQ | 3-O-[Î'-D-Glucopyranosyl(1â†'6)-Î'-D-Glucopyranosyl]-20-O-Î'-D-Glucopyranosyl-3Î',12Î',20(S)-Trihydroxydammar-24-Ene    | GLRA3   | 0.8448 |
| SQ | 3-O-[Î'-D-Glucopyranosyl(1â†'6)-Î'-D-Glucopyranosyl]-20-O-Î'-D-Glucopyranosyl-3Î',12Î',20(S)-Trihydroxydammar-24-Ene    | HSD11B1 | 0.8182 |
| SQ | 3-O-[Î'-D-Glucopyranosyl(1â†'6)-Î'-D-Glucopyranosyl]-20-O-Î'-D-Glucopyranosyl-3Î',12Î',20(S)-Trihydroxydammar-24-Ene    | IL1B    | 0.8364 |
| SQ | 3-O-[Î'-D-Glucopyranosyl(1â†'6)-Î'-D-Glucopyranosyl]-20-O-Î'-D-Glucopyranosyl-3Î',12Î',20(S)-Trihydroxydammar-24-Ene    | IL6     | 0.8364 |

|    |                                                                                                                                                                                  |         |        |
|----|----------------------------------------------------------------------------------------------------------------------------------------------------------------------------------|---------|--------|
| SQ | 3-O-[1 <sup>→</sup> 6]-D-Glucopyranosyl(1 <sup>→</sup> 6)-D-Glucopyranosyl]-20-O-1 <sup>→</sup> 6-D-Glucopyranosyl-3 <sup>→</sup> 1 <sup>→</sup> 2,20(S)-Trihydroxydammar-24-Ene | LPL     | 0.8182 |
| SQ | 3-O-[1 <sup>→</sup> 6]-D-Glucopyranosyl(1 <sup>→</sup> 6)-D-Glucopyranosyl]-20-O-1 <sup>→</sup> 6-D-Glucopyranosyl-3 <sup>→</sup> 1 <sup>→</sup> 2,20(S)-Trihydroxydammar-24-Ene | NFKB1   | 0.8364 |
| SQ | 3-O-[1 <sup>→</sup> 6]-D-Glucopyranosyl(1 <sup>→</sup> 6)-D-Glucopyranosyl]-20-O-1 <sup>→</sup> 6-D-Glucopyranosyl-3 <sup>→</sup> 1 <sup>→</sup> 2,20(S)-Trihydroxydammar-24-Ene | NFKB2   | 0.8364 |
| SQ | 3-O-[1 <sup>→</sup> 6]-D-Glucopyranosyl(1 <sup>→</sup> 6)-D-Glucopyranosyl]-20-O-1 <sup>→</sup> 6-D-Glucopyranosyl-3 <sup>→</sup> 1 <sup>→</sup> 2,20(S)-Trihydroxydammar-24-Ene | NR3C1   | 0.8214 |
| SQ | 3-O-[1 <sup>→</sup> 6]-D-Glucopyranosyl(1 <sup>→</sup> 6)-D-Glucopyranosyl]-20-O-1 <sup>→</sup> 6-D-Glucopyranosyl-3 <sup>→</sup> 1 <sup>→</sup> 2,20(S)-Trihydroxydammar-24-Ene | PPP1CC  | 0.8545 |
| SQ | 3-O-[1 <sup>→</sup> 6]-D-Glucopyranosyl(1 <sup>→</sup> 6)-D-Glucopyranosyl]-20-O-1 <sup>→</sup> 6-D-Glucopyranosyl-3 <sup>→</sup> 1 <sup>→</sup> 2,20(S)-Trihydroxydammar-24-Ene | SLCO1B3 | 1      |
| SQ | 3-O-[1 <sup>→</sup> 6]-D-Glucopyranosyl(1 <sup>→</sup> 6)-D-Glucopyranosyl]-20-O-1 <sup>→</sup> 6-D-Glucopyranosyl-3 <sup>→</sup> 1 <sup>→</sup> 2,20(S)-Trihydroxydammar-24-Ene | TNF     | 0.8364 |
| SQ | 3-O-[1 <sup>→</sup> 6]-D-Glucopyranosyl(1 <sup>→</sup> 6)-D-Glucopyranosyl]-20-O-1 <sup>→</sup> 6-D-Glucopyranosyl-3 <sup>→</sup> 1 <sup>→</sup> 2,20(S)-Trihydroxydammar-24-Ene | VDR     | 0.8679 |
| SQ | 3-O-[1 <sup>→</sup> 6]-D-Glucopyranosyl(1 <sup>→</sup> 6)-D-Glucopyranosyl]-20-O-1 <sup>→</sup> 6-D-Glucopyranosyl-3 <sup>→</sup> 1 <sup>→</sup> 2,20(S)-Trihydroxydammar-24-Ene | YWHAE   | 0.8276 |
| SQ | 6-O-1 <sup>→</sup> 6-D-Glucopyranosyl-20-O-1 <sup>→</sup> 6-D-Glucopyranosyl-3 <sup>→</sup> 1 <sup>→</sup> 6,12 <sup>→</sup> 2,20(S),25-Pentahydroxydammar-23-Ene                | ABO     | 0.8235 |
| SQ | 6-O-1 <sup>→</sup> 6-D-Glucopyranosyl-20-O-1 <sup>→</sup> 6-D-Glucopyranosyl-3 <sup>→</sup> 1 <sup>→</sup> 6,12 <sup>→</sup> 2,20(S),25-Pentahydroxydammar-23-Ene                | ATP1A1  | 0.8909 |

|    |                                                                                                  |          |        |
|----|--------------------------------------------------------------------------------------------------|----------|--------|
| SQ | 6-O-Î'-D-Glucopyranosyl-20-O-Î'-D-Glucopyranosyl-3Î',6Î',12Î',20(S),25-Pentahydroxydammar-23-Ene | ATP1A2   | 0.8727 |
| SQ | 6-O-Î'-D-Glucopyranosyl-20-O-Î'-D-Glucopyranosyl-3Î',6Î',12Î',20(S),25-Pentahydroxydammar-23-Ene | ATP1A3   | 0.8727 |
| SQ | 6-O-Î'-D-Glucopyranosyl-20-O-Î'-D-Glucopyranosyl-3Î',6Î',12Î',20(S),25-Pentahydroxydammar-23-Ene | GABRB3   | 0.8103 |
| SQ | 6-O-Î'-D-Glucopyranosyl-20-O-Î'-D-Glucopyranosyl-3Î',6Î',12Î',20(S),25-Pentahydroxydammar-23-Ene | GLRA3    | 0.8103 |
| SQ | 6-O-Î'-D-Glucopyranosyl-20-O-Î'-D-Glucopyranosyl-3Î',6Î',12Î',20(S),25-Pentahydroxydammar-23-Ene | IL1B     | 0.8    |
| SQ | 6-O-Î'-D-Glucopyranosyl-20-O-Î'-D-Glucopyranosyl-3Î',6Î',12Î',20(S),25-Pentahydroxydammar-23-Ene | IL6      | 0.8    |
| SQ | 6-O-Î'-D-Glucopyranosyl-20-O-Î'-D-Glucopyranosyl-3Î',6Î',12Î',20(S),25-Pentahydroxydammar-23-Ene | NFKB1    | 0.8    |
| SQ | 6-O-Î'-D-Glucopyranosyl-20-O-Î'-D-Glucopyranosyl-3Î',6Î',12Î',20(S),25-Pentahydroxydammar-23-Ene | NFKB2    | 0.8    |
| SQ | 6-O-Î'-D-Glucopyranosyl-20-O-Î'-D-Glucopyranosyl-3Î',6Î',12Î',20(S),25-Pentahydroxydammar-23-Ene | PPP1CC   | 0.8182 |
| SQ | 6-O-Î'-D-Glucopyranosyl-20-O-Î'-D-Glucopyranosyl-3Î',6Î',12Î',20(S),25-Pentahydroxydammar-23-Ene | SERPINA1 | 0.8077 |
| SQ | 6-O-Î'-D-Glucopyranosyl-20-O-Î'-D-Glucopyranosyl-3Î',6Î',12Î',20(S),25-Pentahydroxydammar-23-Ene | SLCO1B3  | 0.9615 |
| SQ | 6-O-Î'-D-Glucopyranosyl-20-O-Î'-D-Glucopyranosyl-3Î',6Î',12Î',20(S),25-Pentahydroxydammar-23-Ene | TNF      | 0.8    |
| SQ | 6-O-Î'-D-Glucopyranosyl-20-O-Î'-D-Glucopyranosyl-3Î',6Î',12Î',20(S),25-Pentahydroxydammar-23-Ene | VDR      | 0.8302 |
| SQ | Notoginsenoside A                                                                                | ABO      | 0.8235 |
| SQ | Notoginsenoside A                                                                                | ATP1A1   | 0.8909 |
| SQ | Notoginsenoside A                                                                                | ATP1A2   | 0.8727 |



|    |                   |          |        |
|----|-------------------|----------|--------|
| SQ | Notoginsenoside A | ATP1A3   | 0.8727 |
| SQ | Notoginsenoside A | GABRB3   | 0.8103 |
| SQ | Notoginsenoside A | GLRA3    | 0.8103 |
| SQ | Notoginsenoside A | IL1B     | 0.8    |
| SQ | Notoginsenoside A | IL6      | 0.8    |
| SQ | Notoginsenoside A | NFKB1    | 0.8    |
| SQ | Notoginsenoside A | NFKB2    | 0.8    |
| SQ | Notoginsenoside A | PPP1CC   | 0.8182 |
| SQ | Notoginsenoside A | SERPINA1 | 0.8077 |
| SQ | Notoginsenoside A | SLCO1B3  | 0.9615 |
| SQ | Notoginsenoside A | TNF      | 0.8    |
| SQ | Notoginsenoside A | VDR      | 0.8302 |
| SQ | Notoginsenoside B | ATP1A1   | 0.9286 |
| SQ | Notoginsenoside B | ATP1A2   | 0.9107 |
| SQ | Notoginsenoside B | ATP1A3   | 0.9107 |
| SQ | Notoginsenoside B | CASP3    | 0.8214 |
| SQ | Notoginsenoside B | GABRB3   | 0.8475 |
| SQ | Notoginsenoside B | GLRA3    | 0.8475 |
| SQ | Notoginsenoside B | HSD11B1  | 0.8214 |
| SQ | Notoginsenoside B | IL1B     | 0.8727 |
| SQ | Notoginsenoside B | IL6      | 0.8727 |
| SQ | Notoginsenoside B | LPL      | 0.8214 |
| SQ | Notoginsenoside B | NFKB1    | 0.8727 |
| SQ | Notoginsenoside B | NFKB2    | 0.8727 |
| SQ | Notoginsenoside B | NR3C1    | 0.8246 |
| SQ | Notoginsenoside B | PPP1CC   | 0.8909 |
| SQ | Notoginsenoside B | SLCO1B3  | 0.963  |
| SQ | Notoginsenoside B | TNF      | 0.8727 |
| SQ | Notoginsenoside B | VDR      | 0.8704 |
| SQ | Notoginsenoside B | YWHAE    | 0.8621 |
| SQ | Notoginsenoside C | ATP1A1   | 0.8644 |
| SQ | Notoginsenoside C | ATP1A2   | 0.8475 |
| SQ | Notoginsenoside C | ATP1A3   | 0.8475 |
| SQ | Notoginsenoside C | IL1B     | 0.8103 |
| SQ | Notoginsenoside C | IL6      | 0.8103 |
| SQ | Notoginsenoside C | NFKB1    | 0.8103 |
| SQ | Notoginsenoside C | NFKB2    | 0.8103 |
| SQ | Notoginsenoside C | PPP1CC   | 0.8276 |
| SQ | Notoginsenoside C | SLCO1B3  | 0.9286 |
| SQ | Notoginsenoside C | TNF      | 0.8103 |
| SQ | Notoginsenoside C | VDR      | 0.8393 |
| SQ | Notoginsenoside C | YWHAE    | 0.8033 |
| SQ | Notoginsenoside D | ATP1A1   | 0.9273 |
| SQ | Notoginsenoside D | ATP1A2   | 0.9091 |
| SQ | Notoginsenoside D | ATP1A3   | 0.9091 |
| SQ | Notoginsenoside D | CASP3    | 0.8182 |
| SQ | Notoginsenoside D | GABRB3   | 0.8448 |
| SQ | Notoginsenoside D | GLRA3    | 0.8448 |
| SQ | Notoginsenoside D | HSD11B1  | 0.8182 |
| SQ | Notoginsenoside D | IL1B     | 0.8364 |
| SQ | Notoginsenoside D | IL6      | 0.8364 |
| SQ | Notoginsenoside D | LPL      | 0.8182 |
| SQ | Notoginsenoside D | NFKB1    | 0.8364 |
| SQ | Notoginsenoside D | NFKB2    | 0.8364 |
| SQ | Notoginsenoside D | NR3C1    | 0.8214 |

|    |                   |          |        |
|----|-------------------|----------|--------|
| SQ | Notoginsenoside D | PPP1CC   | 0.8545 |
| SQ | Notoginsenoside D | SLCO1B3  | 1      |
| SQ | Notoginsenoside D | TNF      | 0.8364 |
| SQ | Notoginsenoside D | VDR      | 0.8679 |
| SQ | Notoginsenoside D | YWHAE    | 0.8276 |
| SQ | Notoginsenoside G | ANXA1    | 0.8    |
| SQ | Notoginsenoside G | ATP1A1   | 0.9107 |
| SQ | Notoginsenoside G | ATP1A2   | 0.8929 |
| SQ | Notoginsenoside G | ATP1A3   | 0.8929 |
| SQ | Notoginsenoside G | CASP3    | 0.8364 |
| SQ | Notoginsenoside G | GABRB3   | 0.8621 |
| SQ | Notoginsenoside G | GLRA3    | 0.8621 |
| SQ | Notoginsenoside G | HSD11B1  | 0.8364 |
| SQ | Notoginsenoside G | HSD11B2  | 0.8    |
| SQ | Notoginsenoside G | HSD3B1   | 0.8    |
| SQ | Notoginsenoside G | IL1B     | 0.8214 |
| SQ | Notoginsenoside G | IL6      | 0.8214 |
| SQ | Notoginsenoside G | LPL      | 0.8364 |
| SQ | Notoginsenoside G | NFKB1    | 0.8364 |
| SQ | Notoginsenoside G | NFKB2    | 0.8364 |
| SQ | Notoginsenoside G | NR3C1    | 0.8393 |
| SQ | Notoginsenoside G | PPP1CC   | 0.8393 |
| SQ | Notoginsenoside G | SLCO1B3  | 0.9811 |
| SQ | Notoginsenoside G | TNF      | 0.8364 |
| SQ | Notoginsenoside G | VDR      | 0.8519 |
| SQ | Notoginsenoside G | YWHAE    | 0.8448 |
| SQ | Notoginsenoside H | ABO      | 0.8235 |
| SQ | Notoginsenoside H | ATP1A1   | 0.8909 |
| SQ | Notoginsenoside H | ATP1A2   | 0.8727 |
| SQ | Notoginsenoside H | ATP1A3   | 0.8727 |
| SQ | Notoginsenoside H | GABRB3   | 0.8103 |
| SQ | Notoginsenoside H | GLRA3    | 0.8103 |
| SQ | Notoginsenoside H | IL1B     | 0.8    |
| SQ | Notoginsenoside H | IL6      | 0.8    |
| SQ | Notoginsenoside H | NFKB1    | 0.8    |
| SQ | Notoginsenoside H | NFKB2    | 0.8    |
| SQ | Notoginsenoside H | PPP1CC   | 0.8182 |
| SQ | Notoginsenoside H | SERPINA1 | 0.8077 |
| SQ | Notoginsenoside H | SLCO1B3  | 0.9615 |
| SQ | Notoginsenoside H | TNF      | 0.8    |
| SQ | Notoginsenoside H | VDR      | 0.8302 |
| SQ | Notoginsenoside I | ATP1A1   | 0.9091 |
| SQ | Notoginsenoside I | ATP1A2   | 0.8909 |
| SQ | Notoginsenoside I | ATP1A3   | 0.8909 |
| SQ | Notoginsenoside I | CASP3    | 0.8333 |
| SQ | Notoginsenoside I | GABRB3   | 0.8596 |
| SQ | Notoginsenoside I | GLRA3    | 0.8596 |
| SQ | Notoginsenoside I | HSD11B1  | 0.8333 |
| SQ | Notoginsenoside I | IL1B     | 0.8182 |
| SQ | Notoginsenoside I | IL6      | 0.8182 |
| SQ | Notoginsenoside I | LPL      | 0.8333 |
| SQ | Notoginsenoside I | NFKB1    | 0.8333 |
| SQ | Notoginsenoside I | NFKB2    | 0.8333 |
| SQ | Notoginsenoside I | NR3C1    | 0.8036 |
| SQ | Notoginsenoside I | PPP1CC   | 0.8364 |

|    |                   |          |        |
|----|-------------------|----------|--------|
| SQ | Notoginsenoside I | SLCO1B3  | 0.9808 |
| SQ | Notoginsenoside I | TNF      | 0.8333 |
| SQ | Notoginsenoside I | VDR      | 0.8491 |
| SQ | Notoginsenoside I | YWHAE    | 0.8103 |
| SQ | Notoginsenoside J | ABO      | 0.84   |
| SQ | Notoginsenoside J | ATP1A1   | 0.8727 |
| SQ | Notoginsenoside J | ATP1A2   | 0.8545 |
| SQ | Notoginsenoside J | ATP1A3   | 0.8545 |
| SQ | Notoginsenoside J | PPP1CC   | 0.8    |
| SQ | Notoginsenoside J | RARG     | 0.8    |
| SQ | Notoginsenoside J | SERPINA1 | 0.8235 |
| SQ | Notoginsenoside J | SLCO1B3  | 0.9423 |
| SQ | Notoginsenoside J | VDR      | 0.8113 |
| SQ | Notoginsenoside K | ATP1A1   | 0.8448 |
| SQ | Notoginsenoside K | ATP1A2   | 0.8276 |
| SQ | Notoginsenoside K | ATP1A3   | 0.8276 |
| SQ | Notoginsenoside K | SLCO1B3  | 0.9091 |
| SQ | Notoginsenoside L | ATP1A1   | 0.9273 |
| SQ | Notoginsenoside L | ATP1A2   | 0.9091 |
| SQ | Notoginsenoside L | ATP1A3   | 0.9091 |
| SQ | Notoginsenoside L | CASP3    | 0.8182 |
| SQ | Notoginsenoside L | GABRB3   | 0.8448 |
| SQ | Notoginsenoside L | GLRA3    | 0.8448 |
| SQ | Notoginsenoside L | HSD11B1  | 0.8182 |
| SQ | Notoginsenoside L | IL1B     | 0.8364 |
| SQ | Notoginsenoside L | IL6      | 0.8364 |
| SQ | Notoginsenoside L | LPL      | 0.8182 |
| SQ | Notoginsenoside L | NFKB1    | 0.8364 |
| SQ | Notoginsenoside L | NFKB2    | 0.8364 |
| SQ | Notoginsenoside L | NR3C1    | 0.8214 |
| SQ | Notoginsenoside L | PPP1CC   | 0.8545 |
| SQ | Notoginsenoside L | SLCO1B3  | 1      |
| SQ | Notoginsenoside L | TNF      | 0.8364 |
| SQ | Notoginsenoside L | VDR      | 0.8679 |
| SQ | Notoginsenoside L | YWHAE    | 0.8276 |
| SQ | Notoginsenoside M | ATP1A1   | 0.9273 |
| SQ | Notoginsenoside M | ATP1A2   | 0.9091 |
| SQ | Notoginsenoside M | ATP1A3   | 0.9091 |
| SQ | Notoginsenoside M | CASP3    | 0.8182 |
| SQ | Notoginsenoside M | GABRB3   | 0.8448 |
| SQ | Notoginsenoside M | GLRA3    | 0.8448 |
| SQ | Notoginsenoside M | HSD11B1  | 0.8182 |
| SQ | Notoginsenoside M | IL1B     | 0.8364 |
| SQ | Notoginsenoside M | IL6      | 0.8364 |
| SQ | Notoginsenoside M | LPL      | 0.8182 |
| SQ | Notoginsenoside M | NFKB1    | 0.8364 |
| SQ | Notoginsenoside M | NFKB2    | 0.8364 |
| SQ | Notoginsenoside M | NR3C1    | 0.8214 |
| SQ | Notoginsenoside M | PPP1CC   | 0.8545 |
| SQ | Notoginsenoside M | SLCO1B3  | 1      |
| SQ | Notoginsenoside M | TNF      | 0.8364 |
| SQ | Notoginsenoside M | VDR      | 0.8679 |
| SQ | Notoginsenoside M | YWHAE    | 0.8276 |
| SQ | Notoginsenoside N | ATP1A1   | 0.9273 |
| SQ | Notoginsenoside N | ATP1A2   | 0.9091 |

|    |                    |         |        |
|----|--------------------|---------|--------|
| SQ | Notoginsenoside N  | ATP1A3  | 0.9091 |
| SQ | Notoginsenoside N  | CASP3   | 0.8182 |
| SQ | Notoginsenoside N  | GABRB3  | 0.8448 |
| SQ | Notoginsenoside N  | GLRA3   | 0.8448 |
| SQ | Notoginsenoside N  | HSD11B1 | 0.8182 |
| SQ | Notoginsenoside N  | IL1B    | 0.8364 |
| SQ | Notoginsenoside N  | IL6     | 0.8364 |
| SQ | Notoginsenoside N  | LPL     | 0.8182 |
| SQ | Notoginsenoside N  | NFKB1   | 0.8364 |
| SQ | Notoginsenoside N  | NFKB2   | 0.8364 |
| SQ | Notoginsenoside N  | NR3C1   | 0.8214 |
| SQ | Notoginsenoside N  | PPP1CC  | 0.8545 |
| SQ | Notoginsenoside N  | SLCO1B3 | 1      |
| SQ | Notoginsenoside N  | TNF     | 0.8364 |
| SQ | Notoginsenoside N  | VDR     | 0.8679 |
| SQ | Notoginsenoside N  | YWHAE   | 0.8276 |
| SQ | Notoginsenoside R2 | ATP1A1  | 0.9273 |
| SQ | Notoginsenoside R2 | ATP1A2  | 0.9091 |
| SQ | Notoginsenoside R2 | ATP1A3  | 0.9091 |
| SQ | Notoginsenoside R2 | CASP3   | 0.8182 |
| SQ | Notoginsenoside R2 | GABRB3  | 0.8448 |
| SQ | Notoginsenoside R2 | GLRA3   | 0.8448 |
| SQ | Notoginsenoside R2 | HSD11B1 | 0.8182 |
| SQ | Notoginsenoside R2 | IL1B    | 0.8364 |
| SQ | Notoginsenoside R2 | IL6     | 0.8364 |
| SQ | Notoginsenoside R2 | LPL     | 0.8182 |
| SQ | Notoginsenoside R2 | NFKB1   | 0.8364 |
| SQ | Notoginsenoside R2 | NFKB2   | 0.8364 |
| SQ | Notoginsenoside R2 | NR3C1   | 0.8214 |
| SQ | Notoginsenoside R2 | PPP1CC  | 0.8545 |
| SQ | Notoginsenoside R2 | SLCO1B3 | 1      |
| SQ | Notoginsenoside R2 | TNF     | 0.8364 |
| SQ | Notoginsenoside R2 | VDR     | 0.8679 |
| SQ | Notoginsenoside R2 | YWHAE   | 0.8276 |
| SQ | Notoginsenoside R3 | ATP1A1  | 0.9273 |
| SQ | Notoginsenoside R3 | ATP1A2  | 0.9091 |
| SQ | Notoginsenoside R3 | ATP1A3  | 0.9091 |
| SQ | Notoginsenoside R3 | CASP3   | 0.8182 |
| SQ | Notoginsenoside R3 | GABRB3  | 0.8448 |
| SQ | Notoginsenoside R3 | GLRA3   | 0.8448 |
| SQ | Notoginsenoside R3 | HSD11B1 | 0.8182 |
| SQ | Notoginsenoside R3 | IL1B    | 0.8364 |
| SQ | Notoginsenoside R3 | IL6     | 0.8364 |
| SQ | Notoginsenoside R3 | LPL     | 0.8182 |
| SQ | Notoginsenoside R3 | NFKB1   | 0.8364 |
| SQ | Notoginsenoside R3 | NFKB2   | 0.8364 |
| SQ | Notoginsenoside R3 | NR3C1   | 0.8214 |
| SQ | Notoginsenoside R3 | PPP1CC  | 0.8545 |
| SQ | Notoginsenoside R3 | SLCO1B3 | 1      |
| SQ | Notoginsenoside R3 | TNF     | 0.8364 |
| SQ | Notoginsenoside R3 | VDR     | 0.8679 |
| SQ | Notoginsenoside R3 | YWHAE   | 0.8276 |
| SQ | Notoginsenoside R6 | ATP1A1  | 0.9273 |
| SQ | Notoginsenoside R6 | ATP1A2  | 0.9091 |
| SQ | Notoginsenoside R6 | ATP1A3  | 0.9091 |

|    |                    |         |        |
|----|--------------------|---------|--------|
| SQ | Notoginsenoside R6 | CASP3   | 0.8182 |
| SQ | Notoginsenoside R6 | GABRB3  | 0.8448 |
| SQ | Notoginsenoside R6 | GLRA3   | 0.8448 |
| SQ | Notoginsenoside R6 | HSD11B1 | 0.8182 |
| SQ | Notoginsenoside R6 | IL1B    | 0.8364 |
| SQ | Notoginsenoside R6 | IL6     | 0.8364 |
| SQ | Notoginsenoside R6 | LPL     | 0.8182 |
| SQ | Notoginsenoside R6 | NFKB1   | 0.8364 |
| SQ | Notoginsenoside R6 | NFKB2   | 0.8364 |
| SQ | Notoginsenoside R6 | NR3C1   | 0.8214 |
| SQ | Notoginsenoside R6 | PPP1CC  | 0.8545 |
| SQ | Notoginsenoside R6 | SLCO1B3 | 1      |
| SQ | Notoginsenoside R6 | TNF     | 0.8364 |
| SQ | Notoginsenoside R6 | VDR     | 0.8679 |
| SQ | Notoginsenoside R6 | YWHAE   | 0.8276 |
| SQ | Quinquenoside I    | ANXA1   | 0.8    |
| SQ | Quinquenoside I    | ATP1A1  | 0.9455 |
| SQ | Quinquenoside I    | ATP1A2  | 0.9273 |
| SQ | Quinquenoside I    | ATP1A3  | 0.9273 |
| SQ | Quinquenoside I    | CASP3   | 0.8364 |
| SQ | Quinquenoside I    | GABRB3  | 0.8621 |
| SQ | Quinquenoside I    | GLRA3   | 0.8621 |
| SQ | Quinquenoside I    | HSD11B1 | 0.8364 |
| SQ | Quinquenoside I    | HSD11B2 | 0.8    |
| SQ | Quinquenoside I    | HSD3B1  | 0.8    |
| SQ | Quinquenoside I    | IL1B    | 0.8545 |
| SQ | Quinquenoside I    | IL6     | 0.8545 |
| SQ | Quinquenoside I    | LPL     | 0.8364 |
| SQ | Quinquenoside I    | NFKB1   | 0.8545 |
| SQ | Quinquenoside I    | NFKB2   | 0.8545 |
| SQ | Quinquenoside I    | NR3C1   | 0.8393 |
| SQ | Quinquenoside I    | PPP1CC  | 0.8727 |
| SQ | Quinquenoside I    | SLCO1B3 | 0.9811 |
| SQ | Quinquenoside I    | TNF     | 0.8545 |
| SQ | Quinquenoside I    | VDR     | 0.8519 |
| SQ | Quinquenoside I    | YWHAE   | 0.8448 |
| SQ | Quinquenoside Ii   | ANXA1   | 0.8036 |
| SQ | Quinquenoside Ii   | ATP1A1  | 0.9286 |
| SQ | Quinquenoside Ii   | ATP1A2  | 0.9107 |
| SQ | Quinquenoside Ii   | ATP1A3  | 0.9107 |
| SQ | Quinquenoside Ii   | CASP3   | 0.8214 |
| SQ | Quinquenoside Ii   | GABRB3  | 0.8793 |
| SQ | Quinquenoside Ii   | GLRA3   | 0.8793 |
| SQ | Quinquenoside Ii   | HSD11B1 | 0.8214 |
| SQ | Quinquenoside Ii   | HSD11B2 | 0.8036 |
| SQ | Quinquenoside Ii   | HSD3B1  | 0.8036 |
| SQ | Quinquenoside Ii   | IL1B    | 0.8393 |
| SQ | Quinquenoside Ii   | IL6     | 0.8393 |
| SQ | Quinquenoside Ii   | LPL     | 0.8214 |
| SQ | Quinquenoside Ii   | NFKB1   | 0.8393 |
| SQ | Quinquenoside Ii   | NFKB2   | 0.8393 |
| SQ | Quinquenoside Ii   | NR3C1   | 0.8246 |
| SQ | Quinquenoside Ii   | PPP1CC  | 0.8571 |
| SQ | Quinquenoside Ii   | SLCO1B3 | 0.963  |
| SQ | Quinquenoside Ii   | TNF     | 0.8393 |

|    |                  |         |        |
|----|------------------|---------|--------|
| SQ | Quinuenoside Ii  | VDR     | 0.8364 |
| SQ | Quinuenoside Ii  | YWHAE   | 0.8305 |
| SQ | Quinuenoside Iii | ANXA1   | 0.8    |
| SQ | Quinuenoside Iii | ATP1A1  | 0.9455 |
| SQ | Quinuenoside Iii | ATP1A2  | 0.9273 |
| SQ | Quinuenoside Iii | ATP1A3  | 0.9273 |
| SQ | Quinuenoside Iii | CASP3   | 0.8364 |
| SQ | Quinuenoside Iii | GABRB3  | 0.8621 |
| SQ | Quinuenoside Iii | GLRA3   | 0.8621 |
| SQ | Quinuenoside Iii | HSD11B1 | 0.8364 |
| SQ | Quinuenoside Iii | HSD11B2 | 0.8    |
| SQ | Quinuenoside Iii | HSD3B1  | 0.8    |
| SQ | Quinuenoside Iii | IL1B    | 0.8545 |
| SQ | Quinuenoside Iii | IL6     | 0.8545 |
| SQ | Quinuenoside Iii | LPL     | 0.8364 |
| SQ | Quinuenoside Iii | NFKB1   | 0.8545 |
| SQ | Quinuenoside Iii | NFKB2   | 0.8545 |
| SQ | Quinuenoside Iii | NR3C1   | 0.8393 |
| SQ | Quinuenoside Iii | PPP1CC  | 0.8727 |
| SQ | Quinuenoside Iii | SLCO1B3 | 0.9811 |
| SQ | Quinuenoside Iii | TNF     | 0.8545 |
| SQ | Quinuenoside Iii | VDR     | 0.8519 |
| SQ | Quinuenoside Iii | YWHAE   | 0.8448 |
| SQ | Quinuenoside Iv  | ANXA1   | 0.8    |
| SQ | Quinuenoside Iv  | ATP1A1  | 0.9107 |
| SQ | Quinuenoside Iv  | ATP1A2  | 0.8929 |
| SQ | Quinuenoside Iv  | ATP1A3  | 0.8929 |
| SQ | Quinuenoside Iv  | CASP3   | 0.8364 |
| SQ | Quinuenoside Iv  | GABRB3  | 0.8621 |
| SQ | Quinuenoside Iv  | GLRA3   | 0.8621 |
| SQ | Quinuenoside Iv  | HSD11B1 | 0.8364 |
| SQ | Quinuenoside Iv  | HSD11B2 | 0.8    |
| SQ | Quinuenoside Iv  | HSD3B1  | 0.8    |
| SQ | Quinuenoside Iv  | IL1B    | 0.8214 |
| SQ | Quinuenoside Iv  | IL6     | 0.8214 |
| SQ | Quinuenoside Iv  | LPL     | 0.8364 |
| SQ | Quinuenoside Iv  | NFKB1   | 0.8364 |
| SQ | Quinuenoside Iv  | NFKB2   | 0.8364 |
| SQ | Quinuenoside Iv  | NR3C1   | 0.8393 |
| SQ | Quinuenoside Iv  | PPP1CC  | 0.8393 |
| SQ | Quinuenoside Iv  | SLCO1B3 | 0.9811 |
| SQ | Quinuenoside Iv  | TNF     | 0.8364 |
| SQ | Quinuenoside Iv  | VDR     | 0.8519 |
| SQ | Quinuenoside Iv  | YWHAE   | 0.8448 |
| SQ | Quinuenoside V   | ATP1A1  | 0.9273 |
| SQ | Quinuenoside V   | ATP1A2  | 0.9091 |
| SQ | Quinuenoside V   | ATP1A3  | 0.9091 |
| SQ | Quinuenoside V   | CASP3   | 0.8182 |
| SQ | Quinuenoside V   | GABRB3  | 0.8448 |
| SQ | Quinuenoside V   | GLRA3   | 0.8448 |
| SQ | Quinuenoside V   | HSD11B1 | 0.8182 |
| SQ | Quinuenoside V   | IL1B    | 0.8364 |
| SQ | Quinuenoside V   | IL6     | 0.8364 |
| SQ | Quinuenoside V   | LPL     | 0.8182 |
| SQ | Quinuenoside V   | NFKB1   | 0.8364 |

|    |                                                                                      |         |        |
|----|--------------------------------------------------------------------------------------|---------|--------|
| SQ | Quinquenoside V                                                                      | NFKB2   | 0.8364 |
| SQ | Quinquenoside V                                                                      | NR3C1   | 0.8214 |
| SQ | Quinquenoside V                                                                      | PPP1CC  | 0.8545 |
| SQ | Quinquenoside V                                                                      | SLCO1B3 | 1      |
| SQ | Quinquenoside V                                                                      | TNF     | 0.8364 |
| SQ | Quinquenoside V                                                                      | VDR     | 0.8679 |
| SQ | Quinquenoside V                                                                      | YWHAE   | 0.8276 |
| SQ | Sanchinoside B1                                                                      | ANXA1   | 0.8113 |
| SQ | Sanchinoside B1                                                                      | ATP1A1  | 0.8909 |
| SQ | Sanchinoside B1                                                                      | ATP1A2  | 0.8727 |
| SQ | Sanchinoside B1                                                                      | ATP1A3  | 0.8727 |
| SQ | Sanchinoside B1                                                                      | CASP3   | 0.8148 |
| SQ | Sanchinoside B1                                                                      | GABRB3  | 0.8103 |
| SQ | Sanchinoside B1                                                                      | GLRA3   | 0.8103 |
| SQ | Sanchinoside B1                                                                      | HSD11B1 | 0.8148 |
| SQ | Sanchinoside B1                                                                      | HSD11B2 | 0.8113 |
| SQ | Sanchinoside B1                                                                      | HSD3B1  | 0.8113 |
| SQ | Sanchinoside B1                                                                      | IL1B    | 0.8333 |
| SQ | Sanchinoside B1                                                                      | IL6     | 0.8333 |
| SQ | Sanchinoside B1                                                                      | LPL     | 0.8148 |
| SQ | Sanchinoside B1                                                                      | NFKB1   | 0.8333 |
| SQ | Sanchinoside B1                                                                      | NFKB2   | 0.8333 |
| SQ | Sanchinoside B1                                                                      | NR3C1   | 0.8182 |
| SQ | Sanchinoside B1                                                                      | PPP1CC  | 0.8519 |
| SQ | Sanchinoside B1                                                                      | SLCO1B3 | 0.9615 |
| SQ | Sanchinoside B1                                                                      | TNF     | 0.8333 |
| SQ | Sanchinoside B1                                                                      | VDR     | 0.8654 |
| SQ | Sanchinoside B1                                                                      | YWHAE   | 0.8246 |
| SQ | 20-O-Î'-D-<br>Xylopyranosyl(1â†'6)-Î'-D-<br>Glucopyranosyl-20(S)-<br>Protopanaxadiol | ATP1A1  | 0.9091 |
| SQ | 20-O-Î'-D-<br>Xylopyranosyl(1â†'6)-Î'-D-<br>Glucopyranosyl-20(S)-<br>Protopanaxadiol | ATP1A2  | 0.8909 |
| SQ | 20-O-Î'-D-<br>Xylopyranosyl(1â†'6)-Î'-D-<br>Glucopyranosyl-20(S)-<br>Protopanaxadiol | ATP1A3  | 0.8909 |
| SQ | 20-O-Î'-D-<br>Xylopyranosyl(1â†'6)-Î'-D-<br>Glucopyranosyl-20(S)-<br>Protopanaxadiol | CASP3   | 0.8333 |
| SQ | 20-O-Î'-D-<br>Xylopyranosyl(1â†'6)-Î'-D-<br>Glucopyranosyl-20(S)-<br>Protopanaxadiol | GABRB3  | 0.8596 |
| SQ | 20-O-Î'-D-<br>Xylopyranosyl(1â†'6)-Î'-D-<br>Glucopyranosyl-20(S)-<br>Protopanaxadiol | GLRA3   | 0.8596 |

|    |                                                                                                    |         |        |
|----|----------------------------------------------------------------------------------------------------|---------|--------|
| SQ | 20-O- $\beta$ -D-Xylopyranosyl(1 $\rightarrow$ 6)- $\beta$ -D-Glucopyranosyl-20(S)-Protopanaxadiol | HSD11B1 | 0.8333 |
| SQ | 20-O- $\beta$ -D-Xylopyranosyl(1 $\rightarrow$ 6)- $\beta$ -D-Glucopyranosyl-20(S)-Protopanaxadiol | IL1B    | 0.8182 |
| SQ | 20-O- $\beta$ -D-Xylopyranosyl(1 $\rightarrow$ 6)- $\beta$ -D-Glucopyranosyl-20(S)-Protopanaxadiol | IL6     | 0.8182 |
| SQ | 20-O- $\beta$ -D-Xylopyranosyl(1 $\rightarrow$ 6)- $\beta$ -D-Glucopyranosyl-20(S)-Protopanaxadiol | LPL     | 0.8333 |
| SQ | 20-O- $\beta$ -D-Xylopyranosyl(1 $\rightarrow$ 6)- $\beta$ -D-Glucopyranosyl-20(S)-Protopanaxadiol | NFKB1   | 0.8333 |
| SQ | 20-O- $\beta$ -D-Xylopyranosyl(1 $\rightarrow$ 6)- $\beta$ -D-Glucopyranosyl-20(S)-Protopanaxadiol | NFKB2   | 0.8333 |
| SQ | 20-O- $\beta$ -D-Xylopyranosyl(1 $\rightarrow$ 6)- $\beta$ -D-Glucopyranosyl-20(S)-Protopanaxadiol | NR3C1   | 0.8036 |
| SQ | 20-O- $\beta$ -D-Xylopyranosyl(1 $\rightarrow$ 6)- $\beta$ -D-Glucopyranosyl-20(S)-Protopanaxadiol | PPP1CC  | 0.8704 |
| SQ | 20-O- $\beta$ -D-Xylopyranosyl(1 $\rightarrow$ 6)- $\beta$ -D-Glucopyranosyl-20(S)-Protopanaxadiol | SLCO1B3 | 0.9808 |
| SQ | 20-O- $\beta$ -D-Xylopyranosyl(1 $\rightarrow$ 6)- $\beta$ -D-Glucopyranosyl-20(S)-Protopanaxadiol | TNF     | 0.8333 |
| SQ | 20-O- $\beta$ -D-Xylopyranosyl(1 $\rightarrow$ 6)- $\beta$ -D-Glucopyranosyl-20(S)-Protopanaxadiol | VDR     | 0.8491 |
| SQ | 20-O- $\beta$ -D-Xylopyranosyl(1 $\rightarrow$ 6)- $\beta$ -D-Glucopyranosyl-20(S)-Protopanaxadiol | YWHAE   | 0.8421 |
| DS | Sitosterol, $\beta$ -Sitosterol                                                                    | AKR1C1  | 0.8158 |
| DS | Sitosterol, $\beta$ -Sitosterol                                                                    | AKR1C2  | 0.8158 |
| DS | Sitosterol, $\beta$ -Sitosterol                                                                    | AR      | 0.8421 |
| DS | Sitosterol, $\beta$ -Sitosterol                                                                    | CLEC4E  | 0.9714 |
| DS | Sitosterol, $\beta$ -Sitosterol                                                                    | ESR1    | 0.8421 |
| DS | Sitosterol, $\beta$ -Sitosterol                                                                    | ESR2    | 0.8378 |
| DS | Sitosterol, $\beta$ -Sitosterol                                                                    | GABRA1  | 0.8378 |



|    |                          |         |        |
|----|--------------------------|---------|--------|
| DS | Sitosterol,Î¹-Sitosterol | GABRA2  | 0.8378 |
| DS | Sitosterol,Î¹-Sitosterol | GABRA3  | 0.8378 |
| DS | Sitosterol,Î¹-Sitosterol | GABRA4  | 0.8378 |
| DS | Sitosterol,Î¹-Sitosterol | GABRA5  | 0.8378 |
| DS | Sitosterol,Î¹-Sitosterol | GABRA6  | 0.8378 |
| DS | Sitosterol,Î¹-Sitosterol | GABRB1  | 0.8378 |
| DS | Sitosterol,Î¹-Sitosterol | GABRB2  | 0.8378 |
| DS | Sitosterol,Î¹-Sitosterol | GABRB3  | 0.8378 |
| DS | Sitosterol,Î¹-Sitosterol | GABRD   | 0.8378 |
| DS | Sitosterol,Î¹-Sitosterol | GABRE   | 0.8378 |
| DS | Sitosterol,Î¹-Sitosterol | GABRG1  | 0.8378 |
| DS | Sitosterol,Î¹-Sitosterol | GABRG2  | 0.8378 |
| DS | Sitosterol,Î¹-Sitosterol | GABRG3  | 0.8378 |
| DS | Sitosterol,Î¹-Sitosterol | GABRP   | 0.8378 |
| DS | Sitosterol,Î¹-Sitosterol | GABRQ   | 0.8378 |
| DS | Sitosterol,Î¹-Sitosterol | GRIN1   | 0.8378 |
| DS | Sitosterol,Î¹-Sitosterol | GRIN2A  | 0.8378 |
| DS | Sitosterol,Î¹-Sitosterol | GRIN2B  | 0.8378 |
| DS | Sitosterol,Î¹-Sitosterol | GRIN2C  | 0.8378 |
| DS | Sitosterol,Î¹-Sitosterol | GRIN2D  | 0.8378 |
| DS | Sitosterol,Î¹-Sitosterol | GRIN3A  | 0.8378 |
| DS | Sitosterol,Î¹-Sitosterol | GRIN3B  | 0.8378 |
| DS | Sitosterol,Î¹-Sitosterol | HSD17B1 | 0.8378 |
| DS | Sitosterol,Î¹-Sitosterol | LIP3    | 0.8205 |
| DS | Sitosterol,Î¹-Sitosterol | LSS     | 0.9444 |
| DS | Sitosterol,Î¹-Sitosterol | NCOA2   | 0.8158 |
| DS | Sitosterol,Î¹-Sitosterol | NR1I2   | 0.8649 |
| DS | Sitosterol,Î¹-Sitosterol | NR1I3   | 0.9714 |
| DS | Sitosterol,Î¹-Sitosterol | NR3C1   | 0.825  |
| DS | Sitosterol,Î¹-Sitosterol | NR3C2   | 0.8158 |
| DS | Sitosterol,Î¹-Sitosterol | PGR     | 0.8378 |
| DS | Sitosterol,Î¹-Sitosterol | PPARA   | 0.8378 |
| DS | Sitosterol,Î¹-Sitosterol | RORA    | 0.9714 |
| DS | Sitosterol,Î¹-Sitosterol | SIGMAR1 | 0.8378 |
| DS | Sitosterol,Î¹-Sitosterol | SULT2A1 | 0.8378 |
| DS | Sitosterol,Î¹-Sitosterol | SULT2B1 | 0.8649 |
| DS | Sitosterol,Î¹-Sitosterol | VDR     | 0.9714 |
| DS | Stigmasterol             | AKR1C1  | 0.8158 |
| DS | Stigmasterol             | AKR1C2  | 0.8158 |
| DS | Stigmasterol             | AR      | 0.8421 |
| DS | Stigmasterol             | CLEC4E  | 0.9714 |
| DS | Stigmasterol             | ESR1    | 0.8421 |
| DS | Stigmasterol             | ESR2    | 0.8378 |
| DS | Stigmasterol             | GABRA1  | 0.8378 |
| DS | Stigmasterol             | GABRA2  | 0.8378 |
| DS | Stigmasterol             | GABRA3  | 0.8378 |
| DS | Stigmasterol             | GABRA4  | 0.8378 |
| DS | Stigmasterol             | GABRA5  | 0.8378 |
| DS | Stigmasterol             | GABRA6  | 0.8378 |
| DS | Stigmasterol             | GABRB1  | 0.8378 |
| DS | Stigmasterol             | GABRB2  | 0.8378 |
| DS | Stigmasterol             | GABRB3  | 0.8378 |
| DS | Stigmasterol             | GABRD   | 0.8378 |
| DS | Stigmasterol             | GABRE   | 0.8378 |
| DS | Stigmasterol             | GABRG1  | 0.8378 |

|    |                |         |        |
|----|----------------|---------|--------|
| DS | Stigmasterol   | GABRG2  | 0.8378 |
| DS | Stigmasterol   | GABRG3  | 0.8378 |
| DS | Stigmasterol   | GABRP   | 0.8378 |
| DS | Stigmasterol   | GABRQ   | 0.8378 |
| DS | Stigmasterol   | GRIN1   | 0.8378 |
| DS | Stigmasterol   | GRIN2A  | 0.8378 |
| DS | Stigmasterol   | GRIN2B  | 0.8378 |
| DS | Stigmasterol   | GRIN2C  | 0.8378 |
| DS | Stigmasterol   | GRIN2D  | 0.8378 |
| DS | Stigmasterol   | GRIN3A  | 0.8378 |
| DS | Stigmasterol   | GRIN3B  | 0.8378 |
| DS | Stigmasterol   | HSD17B1 | 0.8378 |
| DS | Stigmasterol   | LIP3    | 0.8205 |
| DS | Stigmasterol   | LSS     | 0.9444 |
| DS | Stigmasterol   | NCOA2   | 0.8158 |
| DS | Stigmasterol   | NR1I2   | 0.8649 |
| DS | Stigmasterol   | NR1I3   | 0.9714 |
| DS | Stigmasterol   | NR3C1   | 0.825  |
| DS | Stigmasterol   | NR3C2   | 0.8158 |
| DS | Stigmasterol   | PGR     | 0.8378 |
| DS | Stigmasterol   | PPARA   | 0.8378 |
| DS | Stigmasterol   | RORA    | 0.9714 |
| DS | Stigmasterol   | SIGMAR1 | 0.8378 |
| DS | Stigmasterol   | SULT2A1 | 0.8378 |
| DS | Stigmasterol   | SULT2B1 | 0.8649 |
| DS | Stigmasterol   | VDR     | 0.9714 |
| DS | Oleanolic Acid | ADH1C   | 0.8049 |
| DS | Oleanolic Acid | AKR1C1  | 0.8462 |
| DS | Oleanolic Acid | AKR1C2  | 0.8462 |
| DS | Oleanolic Acid | AR      | 0.875  |
| DS | Oleanolic Acid | CES1    | 0.8049 |
| DS | Oleanolic Acid | CLEC4E  | 0.8    |
| DS | Oleanolic Acid | COX4I1  | 0.8049 |
| DS | Oleanolic Acid | COX5A   | 0.8049 |
| DS | Oleanolic Acid | COX5B   | 0.8049 |
| DS | Oleanolic Acid | COX6A2  | 0.8049 |
| DS | Oleanolic Acid | COX6B1  | 0.8049 |
| DS | Oleanolic Acid | COX6C   | 0.8049 |
| DS | Oleanolic Acid | COX7A1  | 0.8049 |
| DS | Oleanolic Acid | COX7B   | 0.8049 |
| DS | Oleanolic Acid | COX7C   | 0.8049 |
| DS | Oleanolic Acid | COX8A   | 0.8049 |
| DS | Oleanolic Acid | EFTUD1  | 0.8049 |
| DS | Oleanolic Acid | ESR1    | 0.8718 |
| DS | Oleanolic Acid | ESR2    | 0.8205 |
| DS | Oleanolic Acid | ESRRG   | 0.8049 |
| DS | Oleanolic Acid | FABP6   | 0.8049 |
| DS | Oleanolic Acid | FECH    | 0.8049 |
| DS | Oleanolic Acid | GABRA1  | 0.8205 |
| DS | Oleanolic Acid | GABRA2  | 0.8205 |
| DS | Oleanolic Acid | GABRA3  | 0.8205 |
| DS | Oleanolic Acid | GABRA4  | 0.8205 |
| DS | Oleanolic Acid | GABRA5  | 0.8205 |
| DS | Oleanolic Acid | GABRA6  | 0.8205 |
| DS | Oleanolic Acid | GABRB1  | 0.8205 |

|    |                                        |         |        |
|----|----------------------------------------|---------|--------|
| DS | Oleanolic Acid                         | GABRB2  | 0.8205 |
| DS | Oleanolic Acid                         | GABRB3  | 0.8205 |
| DS | Oleanolic Acid                         | GABRD   | 0.8205 |
| DS | Oleanolic Acid                         | GABRE   | 0.8205 |
| DS | Oleanolic Acid                         | GABRG1  | 0.8205 |
| DS | Oleanolic Acid                         | GABRG2  | 0.8205 |
| DS | Oleanolic Acid                         | GABRG3  | 0.8205 |
| DS | Oleanolic Acid                         | GABRP   | 0.8205 |
| DS | Oleanolic Acid                         | GABRQ   | 0.8205 |
| DS | Oleanolic Acid                         | GPBAR1  | 0.8049 |
| DS | Oleanolic Acid                         | GRIN1   | 0.8205 |
| DS | Oleanolic Acid                         | GRIN2A  | 0.8205 |
| DS | Oleanolic Acid                         | GRIN2B  | 0.8205 |
| DS | Oleanolic Acid                         | GRIN2C  | 0.8205 |
| DS | Oleanolic Acid                         | GRIN2D  | 0.8205 |
| DS | Oleanolic Acid                         | GRIN3A  | 0.8205 |
| DS | Oleanolic Acid                         | GRIN3B  | 0.8205 |
| DS | Oleanolic Acid                         | GSTP1   | 0.8049 |
| DS | Oleanolic Acid                         | HOXA10  | 0.814  |
| DS | Oleanolic Acid                         | HSD11B1 | 0.9048 |
| DS | Oleanolic Acid                         | HSD11B2 | 0.8571 |
| DS | Oleanolic Acid                         | HSD17B1 | 0.8205 |
| DS | Oleanolic Acid                         | IGHG2   | 0.814  |
| DS | Oleanolic Acid                         | LSS     | 0.825  |
| DS | Oleanolic Acid                         | MT-CO1  | 0.8049 |
| DS | Oleanolic Acid                         | MT-CO2  | 0.8049 |
| DS | Oleanolic Acid                         | MT-CO3  | 0.8049 |
| DS | Oleanolic Acid                         | NCOA2   | 0.8462 |
| DS | Oleanolic Acid                         | NFKB1   | 0.85   |
| DS | Oleanolic Acid                         | NFKB2   | 0.85   |
| DS | Oleanolic Acid                         | NPPB    | 0.875  |
| DS | Oleanolic Acid                         | NR1H4   | 0.8049 |
| DS | Oleanolic Acid                         | NR1I2   | 0.8462 |
| DS | Oleanolic Acid                         | NR1I3   | 0.8205 |
| DS | Oleanolic Acid                         | NR3C1   | 0.85   |
| DS | Oleanolic Acid                         | NR3C2   | 0.8462 |
| DS | Oleanolic Acid                         | PGR     | 0.8462 |
| DS | Oleanolic Acid                         | PLA2G1B | 0.8049 |
| DS | Oleanolic Acid                         | PPARA   | 0.8205 |
| DS | Oleanolic Acid                         | PRLR    | 0.8372 |
| DS | Oleanolic Acid                         | RORA    | 0.8    |
| DS | Oleanolic Acid                         | SHBG    | 0.8    |
| DS | Oleanolic Acid                         | SIGMAR1 | 0.8205 |
| DS | Oleanolic Acid                         | SULT2A1 | 0.8205 |
| DS | Oleanolic Acid                         | SULT2B1 | 0.8462 |
| DS | Oleanolic Acid                         | VDR     | 0.8293 |
| DS | Alexandrin,Daucosterol,Eleutheroside A | ANXA1   | 0.8148 |
| DS | Alexandrin,Daucosterol,Eleutheroside A | ATP1A1  | 0.8421 |
| DS | Alexandrin,Daucosterol,Eleutheroside A | ATP1A2  | 0.8246 |
| DS | Alexandrin,Daucosterol,Eleutheroside A | ATP1A3  | 0.8246 |

|    |                                        |         |        |
|----|----------------------------------------|---------|--------|
| DS | Alexandrin,Daucosterol,Eleutheroside A | CASP3   | 0.8333 |
| DS | Alexandrin,Daucosterol,Eleutheroside A | GABRB3  | 0.8596 |
| DS | Alexandrin,Daucosterol,Eleutheroside A | GLRA3   | 0.8596 |
| DS | Alexandrin,Daucosterol,Eleutheroside A | HSD11B1 | 0.8333 |
| DS | Alexandrin,Daucosterol,Eleutheroside A | HSD11B2 | 0.8148 |
| DS | Alexandrin,Daucosterol,Eleutheroside A | HSD3B1  | 0.8148 |
| DS | Alexandrin,Daucosterol,Eleutheroside A | LPL     | 0.8333 |
| DS | Alexandrin,Daucosterol,Eleutheroside A | NFKB1   | 0.8333 |
| DS | Alexandrin,Daucosterol,Eleutheroside A | NFKB2   | 0.8333 |
| DS | Alexandrin,Daucosterol,Eleutheroside A | NR3C1   | 0.8148 |
| DS | Alexandrin,Daucosterol,Eleutheroside A | PPP1CC  | 0.8036 |
| DS | Alexandrin,Daucosterol,Eleutheroside A | SLCO1B3 | 0.9074 |
| DS | Alexandrin,Daucosterol,Eleutheroside A | TNF     | 0.8333 |
| DS | Alexandrin,Daucosterol,Eleutheroside A | VDR     | 0.8148 |
| DS | Alexandrin,Daucosterol,Eleutheroside A | YWHAE   | 0.8103 |
| DS | Succinic Acid                          | ACO2    | 0.8235 |
| DS | Succinic Acid                          | AKR1D1  | 0.8421 |
| DS | Succinic Acid                          | ALAD    | 0.8421 |
| DS | Succinic Acid                          | ALDH5A1 | 1      |
| DS | Succinic Acid                          | ASPH    | 1      |
| DS | Succinic Acid                          | BBOX1   | 1      |
| DS | Succinic Acid                          | HBA1    | 0.8421 |
| DS | Succinic Acid                          | HBB     | 0.8421 |
| DS | Succinic Acid                          | HSD17B6 | 1      |
| DS | Succinic Acid                          | OXCT1   | 1      |
| DS | Succinic Acid                          | OXCT2   | 1      |
| DS | Succinic Acid                          | P3H1    | 1      |
| DS | Succinic Acid                          | P3H2    | 1      |
| DS | Succinic Acid                          | P3H3    | 1      |
| DS | Succinic Acid                          | P4HA1   | 1      |
| DS | Succinic Acid                          | P4HA2   | 1      |
| DS | Succinic Acid                          | PLOD1   | 1      |
| DS | Succinic Acid                          | PLOD3   | 1      |
| DS | Succinic Acid                          | SDHA    | 1      |
| DS | Succinic Acid                          | SDHB    | 1      |
| DS | Succinic Acid                          | SDHC    | 1      |
| DS | Succinic Acid                          | SDHD    | 1      |
| DS | Succinic Acid                          | SLC13A1 | 1      |
| DS | Succinic Acid                          | SLC13A2 | 1      |
| DS | Succinic Acid                          | SLC13A3 | 1      |

|    |                                                                                                                                     |          |        |
|----|-------------------------------------------------------------------------------------------------------------------------------------|----------|--------|
| DS | Succinic Acid                                                                                                                       | SLC25A10 | 1      |
| DS | Succinic Acid                                                                                                                       | SRD5A2   | 0.8421 |
| DS | Succinic Acid                                                                                                                       | SUCLA2   | 1      |
| DS | Succinic Acid                                                                                                                       | SUCLG1   | 1      |
| DS | Succinic Acid                                                                                                                       | SUCLG2   | 1      |
| DS | Succinic Acid                                                                                                                       | SUCNR1   | 1      |
| DS | Succinic Acid                                                                                                                       | TMLHE    | 1      |
| DS | Succinic Acid                                                                                                                       | TYR      | 0.8421 |
| DS | Alexandrin,Daucosterol,Caproic Acid,Eleutheroside A,Sitogluside,Strumaroside,Î <sup>1</sup> -Sitosterol-Î <sup>1</sup> -D-Glucoside | ANXA1    | 0.8148 |
| DS | Alexandrin,Daucosterol,Caproic Acid,Eleutheroside A,Sitogluside,Strumaroside,Î <sup>1</sup> -Sitosterol-Î <sup>1</sup> -D-Glucoside | ATP1A1   | 0.8421 |
| DS | Alexandrin,Daucosterol,Caproic Acid,Eleutheroside A,Sitogluside,Strumaroside,Î <sup>1</sup> -Sitosterol-Î <sup>1</sup> -D-Glucoside | ATP1A2   | 0.8246 |
| DS | Alexandrin,Daucosterol,Caproic Acid,Eleutheroside A,Sitogluside,Strumaroside,Î <sup>1</sup> -Sitosterol-Î <sup>1</sup> -D-Glucoside | ATP1A3   | 0.8246 |
| DS | Alexandrin,Daucosterol,Caproic Acid,Eleutheroside A,Sitogluside,Strumaroside,Î <sup>1</sup> -Sitosterol-Î <sup>1</sup> -D-Glucoside | CASP3    | 0.8333 |
| DS | Alexandrin,Daucosterol,Caproic Acid,Eleutheroside A,Sitogluside,Strumaroside,Î <sup>1</sup> -Sitosterol-Î <sup>1</sup> -D-Glucoside | GABRB3   | 0.8596 |
| DS | Alexandrin,Daucosterol,Caproic Acid,Eleutheroside A,Sitogluside,Strumaroside,Î <sup>1</sup> -Sitosterol-Î <sup>1</sup> -D-Glucoside | GLRA3    | 0.8596 |
| DS | Alexandrin,Daucosterol,Caproic Acid,Eleutheroside A,Sitogluside,Strumaroside,Î <sup>1</sup> -Sitosterol-Î <sup>1</sup> -D-Glucoside | HSD11B1  | 0.8333 |
| DS | Alexandrin,Daucosterol,Caproic Acid,Eleutheroside A,Sitogluside,Strumaroside,Î <sup>1</sup> -Sitosterol-Î <sup>1</sup> -D-Glucoside | HSD11B2  | 0.8148 |
| DS | Alexandrin,Daucosterol,Caproic Acid,Eleutheroside A,Sitogluside,Strumaroside,Î <sup>1</sup> -Sitosterol-Î <sup>1</sup> -D-Glucoside | HSD3B1   | 0.8148 |
| DS | Alexandrin,Daucosterol,Caproic Acid,Eleutheroside A,Sitogluside,Strumaroside,Î <sup>1</sup> -Sitosterol-Î <sup>1</sup> -D-Glucoside | LPL      | 0.8333 |

|    |                                                                                                                                     |         |        |
|----|-------------------------------------------------------------------------------------------------------------------------------------|---------|--------|
| DS | Alexandrin,Daucosterol,Caproic Acid,Eleutheroside A,Sitogluside,Strumaroside,Î <sup>2</sup> -Sitosterol-Î <sup>2</sup> -D-Glucoside | NFKB1   | 0.8333 |
| DS | Alexandrin,Daucosterol,Caproic Acid,Eleutheroside A,Sitogluside,Strumaroside,Î <sup>2</sup> -Sitosterol-Î <sup>2</sup> -D-Glucoside | NFKB2   | 0.8333 |
| DS | Alexandrin,Daucosterol,Caproic Acid,Eleutheroside A,Sitogluside,Strumaroside,Î <sup>2</sup> -Sitosterol-Î <sup>2</sup> -D-Glucoside | NR3C1   | 0.8148 |
| DS | Alexandrin,Daucosterol,Caproic Acid,Eleutheroside A,Sitogluside,Strumaroside,Î <sup>2</sup> -Sitosterol-Î <sup>2</sup> -D-Glucoside | PPP1CC  | 0.8036 |
| DS | Alexandrin,Daucosterol,Caproic Acid,Eleutheroside A,Sitogluside,Strumaroside,Î <sup>2</sup> -Sitosterol-Î <sup>2</sup> -D-Glucoside | SLCO1B3 | 0.9074 |
| DS | Alexandrin,Daucosterol,Caproic Acid,Eleutheroside A,Sitogluside,Strumaroside,Î <sup>2</sup> -Sitosterol-Î <sup>2</sup> -D-Glucoside | TNF     | 0.8333 |
| DS | Alexandrin,Daucosterol,Caproic Acid,Eleutheroside A,Sitogluside,Strumaroside,Î <sup>2</sup> -Sitosterol-Î <sup>2</sup> -D-Glucoside | VDR     | 0.8148 |
| DS | Alexandrin,Daucosterol,Caproic Acid,Eleutheroside A,Sitogluside,Strumaroside,Î <sup>2</sup> -Sitosterol-Î <sup>2</sup> -D-Glucoside | YWHAE   | 0.8103 |
| DS | 3,4-Dihydroxybenzoic Acid,Protocatechuic Acid                                                                                       | LCN2    | 0.9091 |
| DS | 3,4-Dihydroxybenzoic Acid,Protocatechuic Acid                                                                                       | MIF     | 0.9524 |
| DS | Protocatechuic Aldehyde                                                                                                             | LCN2    | 0.8182 |
| DS | Protocatechuic Aldehyde                                                                                                             | MIF     | 0.8571 |
| DS | 5,7,4'-Trihydroxy-6,8,3'-Trimethoxyflavone,Labiatenic Acid,Rosmarinic Acid                                                          | PYGM    | 0.8    |
| DS | Ursolic Acid                                                                                                                        | ADH1C   | 0.8049 |
| DS | Ursolic Acid                                                                                                                        | AKR1C1  | 0.8462 |
| DS | Ursolic Acid                                                                                                                        | AKR1C2  | 0.8462 |
| DS | Ursolic Acid                                                                                                                        | AR      | 0.875  |
| DS | Ursolic Acid                                                                                                                        | CES1    | 0.8049 |
| DS | Ursolic Acid                                                                                                                        | CLEC4E  | 0.8    |
| DS | Ursolic Acid                                                                                                                        | COX4I1  | 0.8049 |
| DS | Ursolic Acid                                                                                                                        | COX5A   | 0.8049 |
| DS | Ursolic Acid                                                                                                                        | COX5B   | 0.8049 |
| DS | Ursolic Acid                                                                                                                        | COX6A2  | 0.8049 |
| DS | Ursolic Acid                                                                                                                        | COX6B1  | 0.8049 |
| DS | Ursolic Acid                                                                                                                        | COX6C   | 0.8049 |
| DS | Ursolic Acid                                                                                                                        | COX7A1  | 0.8049 |
| DS | Ursolic Acid                                                                                                                        | COX7B   | 0.8049 |

|    |              |         |        |
|----|--------------|---------|--------|
| DS | Ursolic Acid | COX7C   | 0.8049 |
| DS | Ursolic Acid | COX8A   | 0.8049 |
| DS | Ursolic Acid | EFTUD1  | 0.8049 |
| DS | Ursolic Acid | ESR1    | 0.8718 |
| DS | Ursolic Acid | ESR2    | 0.8205 |
| DS | Ursolic Acid | ESRRG   | 0.8049 |
| DS | Ursolic Acid | FABP6   | 0.8049 |
| DS | Ursolic Acid | FECH    | 0.8049 |
| DS | Ursolic Acid | GABRA1  | 0.8205 |
| DS | Ursolic Acid | GABRA2  | 0.8205 |
| DS | Ursolic Acid | GABRA3  | 0.8205 |
| DS | Ursolic Acid | GABRA4  | 0.8205 |
| DS | Ursolic Acid | GABRA5  | 0.8205 |
| DS | Ursolic Acid | GABRA6  | 0.8205 |
| DS | Ursolic Acid | GABRB1  | 0.8205 |
| DS | Ursolic Acid | GABRB2  | 0.8205 |
| DS | Ursolic Acid | GABRB3  | 0.8205 |
| DS | Ursolic Acid | GABRD   | 0.8205 |
| DS | Ursolic Acid | GABRE   | 0.8205 |
| DS | Ursolic Acid | GABRG1  | 0.8205 |
| DS | Ursolic Acid | GABRG2  | 0.8205 |
| DS | Ursolic Acid | GABRG3  | 0.8205 |
| DS | Ursolic Acid | GABRP   | 0.8205 |
| DS | Ursolic Acid | GABRQ   | 0.8205 |
| DS | Ursolic Acid | GPBAR1  | 0.8049 |
| DS | Ursolic Acid | GRIN1   | 0.8205 |
| DS | Ursolic Acid | GRIN2A  | 0.8205 |
| DS | Ursolic Acid | GRIN2B  | 0.8205 |
| DS | Ursolic Acid | GRIN2C  | 0.8205 |
| DS | Ursolic Acid | GRIN2D  | 0.8205 |
| DS | Ursolic Acid | GRIN3A  | 0.8205 |
| DS | Ursolic Acid | GRIN3B  | 0.8205 |
| DS | Ursolic Acid | GSTP1   | 0.8049 |
| DS | Ursolic Acid | HOXA10  | 0.814  |
| DS | Ursolic Acid | HSD11B1 | 0.9048 |
| DS | Ursolic Acid | HSD11B2 | 0.8571 |
| DS | Ursolic Acid | HSD17B1 | 0.8205 |
| DS | Ursolic Acid | IGHG2   | 0.814  |
| DS | Ursolic Acid | LSS     | 0.825  |
| DS | Ursolic Acid | MT-CO1  | 0.8049 |
| DS | Ursolic Acid | MT-CO2  | 0.8049 |
| DS | Ursolic Acid | MT-CO3  | 0.8049 |
| DS | Ursolic Acid | NCOA2   | 0.8462 |
| DS | Ursolic Acid | NFKB1   | 0.85   |
| DS | Ursolic Acid | NFKB2   | 0.85   |
| DS | Ursolic Acid | NPPB    | 0.875  |
| DS | Ursolic Acid | NR1H4   | 0.8049 |
| DS | Ursolic Acid | NR1I2   | 0.8462 |
| DS | Ursolic Acid | NR1I3   | 0.8205 |
| DS | Ursolic Acid | NR3C1   | 0.85   |
| DS | Ursolic Acid | NR3C2   | 0.8462 |
| DS | Ursolic Acid | PGR     | 0.8462 |
| DS | Ursolic Acid | PLA2G1B | 0.8049 |
| DS | Ursolic Acid | PPARA   | 0.8205 |
| DS | Ursolic Acid | PRLR    | 0.8372 |

|    |                                     |         |        |
|----|-------------------------------------|---------|--------|
| DS | Ursolic Acid                        | RORA    | 0.8    |
| DS | Ursolic Acid                        | SHBG    | 0.8    |
| DS | Ursolic Acid                        | SIGMAR1 | 0.8205 |
| DS | Ursolic Acid                        | SULT2A1 | 0.8205 |
| DS | Ursolic Acid                        | SULT2B1 | 0.8462 |
| DS | Ursolic Acid                        | VDR     | 0.8293 |
| DS | 3-O-Acetyloleanolic Acid            | ALOX5   | 0.8537 |
| DS | 3-O-Acetyloleanolic Acid            | ANXA1   | 0.8085 |
| DS | 3-O-Acetyloleanolic Acid            | AR      | 0.8333 |
| DS | 3-O-Acetyloleanolic Acid            | CASP3   | 0.8125 |
| DS | 3-O-Acetyloleanolic Acid            | ESR1    | 0.8537 |
| DS | 3-O-Acetyloleanolic Acid            | HMGCR   | 0.8261 |
| DS | 3-O-Acetyloleanolic Acid            | HSD11B1 | 0.9286 |
| DS | 3-O-Acetyloleanolic Acid            | HSD11B2 | 0.8372 |
| DS | 3-O-Acetyloleanolic Acid            | HSD3B1  | 0.8085 |
| DS | 3-O-Acetyloleanolic Acid            | IGHG2   | 0.881  |
| DS | 3-O-Acetyloleanolic Acid            | ITGAL   | 0.8261 |
| DS | 3-O-Acetyloleanolic Acid            | ITGB2   | 0.8261 |
| DS | 3-O-Acetyloleanolic Acid            | LPL     | 0.8125 |
| DS | 3-O-Acetyloleanolic Acid            | NCOA1   | 0.814  |
| DS | 3-O-Acetyloleanolic Acid            | NFKB1   | 0.8125 |
| DS | 3-O-Acetyloleanolic Acid            | NFKB2   | 0.8125 |
| DS | 3-O-Acetyloleanolic Acid            | NFKBIA  | 0.814  |
| DS | 3-O-Acetyloleanolic Acid            | NR1H4   | 0.814  |
| DS | 3-O-Acetyloleanolic Acid            | NR1I2   | 0.8537 |
| DS | 3-O-Acetyloleanolic Acid            | NR3C1   | 0.8537 |
| DS | 3-O-Acetyloleanolic Acid            | NR3C2   | 0.8182 |
| DS | 3-O-Acetyloleanolic Acid            | PGR     | 0.8537 |
| DS | 3-O-Acetyloleanolic Acid            | PTGS1   | 0.8537 |
| DS | 3-O-Acetyloleanolic Acid            | TNF     | 0.8125 |
| DS | 1,5-Dihydroxy-3-Methylanthraquinone | P2RY12  | 0.8293 |
| DS | 1,5-Dihydroxy-3-Methylanthraquinone | PTGIR   | 0.8293 |
| DS | 1,5-Dihydroxy-3-Methylanthraquinone | PTGIS   | 0.8293 |
| DS | Salvianolic Acid E                  | MIF     | 0.84   |
| DS | Tanshinaldehyde                     | PIK3CA  | 0.8    |
| DS | Tanshinaldehyde                     | PIK3CG  | 0.8    |
| DS | Tanshinaldehyde                     | PIK3R1  | 0.8    |
| DS | Tanshinaldehyde                     | PLK1    | 0.8    |
| DS | Paramiltioic Acid                   | ATP1A1  | 0.8462 |
| DS | Paramiltioic Acid                   | GABRB3  | 0.8036 |
| DS | Paramiltioic Acid                   | GLRA3   | 0.8036 |
| DS | Paramiltioic Acid                   | NR3C1   | 0.8462 |
| DS | Paramiltioic Acid                   | PPP1CC  | 0.8113 |
| DS | Ferruginol                          | ALOX5   | 0.8    |
| DS | Ferruginol                          | DGKA    | 0.8    |
| DS | Ferruginol                          | NR1I2   | 0.8    |
| DS | Ferruginol                          | PPP2CA  | 0.8    |
| DS | Ferruginol                          | PPP2CB  | 0.8    |
| DS | Ferruginol                          | PRKCA   | 0.8    |
| DS | Ferruginol                          | PRKCB   | 0.8    |
| DS | Ferruginol                          | SEC14L2 | 0.8    |
| DS | Ferruginol                          | SEC14L3 | 0.8    |



|    |            |         |        |
|----|------------|---------|--------|
| DS | Ferruginol | SEC14L4 | 0.8    |
| DS | Sugiol     | ALOX5   | 0.8333 |
| DS | Sugiol     | AR      | 0.8485 |
| DS | Sugiol     | CYP19A1 | 0.8485 |
| DS | Sugiol     | DGKA    | 0.8333 |
| DS | Sugiol     | ESR1    | 0.8485 |
| DS | Sugiol     | ESR2    | 0.8485 |
| DS | Sugiol     | NR1I2   | 0.8333 |
| DS | Sugiol     | PPP2CA  | 0.8333 |
| DS | Sugiol     | PPP2CB  | 0.8333 |
| DS | Sugiol     | PRKCA   | 0.8333 |
| DS | Sugiol     | PRKCB   | 0.8333 |
| DS | Sugiol     | SEC14L2 | 0.8333 |
| DS | Sugiol     | SEC14L3 | 0.8333 |
| DS | Sugiol     | SEC14L4 | 0.8333 |
| DS | Sugiol     | SHBG    | 0.8485 |
| DS | Tigogenin  | AR      | 0.9    |
| DS | Baicalin   | ACTB    | 0.875  |
| DS | Baicalin   | AHR     | 0.8824 |
| DS | Baicalin   | AKT1    | 0.8125 |
| DS | Baicalin   | ATP5A1  | 0.875  |
| DS | Baicalin   | ATP5B   | 0.875  |
| DS | Baicalin   | ATP5C1  | 0.875  |
| DS | Baicalin   | CA1     | 0.9062 |
| DS | Baicalin   | CA12    | 0.9062 |
| DS | Baicalin   | CA14    | 0.9062 |
| DS | Baicalin   | CA2     | 0.9062 |
| DS | Baicalin   | CA3     | 0.9062 |
| DS | Baicalin   | CA4     | 0.9062 |
| DS | Baicalin   | CA5A    | 0.9062 |
| DS | Baicalin   | CA5B    | 0.9062 |
| DS | Baicalin   | CA6     | 0.9062 |
| DS | Baicalin   | CA7     | 0.9062 |
| DS | Baicalin   | CA9     | 0.9062 |
| DS | Baicalin   | CBR1    | 0.875  |
| DS | Baicalin   | CDK6    | 0.8438 |
| DS | Baicalin   | CEBPB   | 0.875  |
| DS | Baicalin   | COMT    | 0.875  |
| DS | Baicalin   | CSNK2A1 | 0.9062 |
| DS | Baicalin   | CSNK2B  | 0.875  |
| DS | Baicalin   | CYP1B1  | 0.875  |
| DS | Baicalin   | DHFRL1  | 0.8824 |
| DS | Baicalin   | DNMT1   | 0.8824 |
| DS | Baicalin   | EIF3F   | 0.875  |
| DS | Baicalin   | ESR1    | 0.875  |
| DS | Baicalin   | ESR2    | 0.875  |
| DS | Baicalin   | ESRRA   | 0.8125 |
| DS | Baicalin   | ESRRB   | 0.8125 |
| DS | Baicalin   | GABRA1  | 0.8    |
| DS | Baicalin   | GABRA2  | 0.8    |
| DS | Baicalin   | GABRA3  | 0.8    |
| DS | Baicalin   | GABRA4  | 0.8    |
| DS | Baicalin   | GABRA5  | 0.8    |
| DS | Baicalin   | GABRA6  | 0.8    |
| DS | Baicalin   | GABRG1  | 0.8    |

|    |                                                       |          |        |
|----|-------------------------------------------------------|----------|--------|
| DS | Baicalin                                              | GABRG2   | 0.8    |
| DS | Baicalin                                              | GABRG3   | 0.8    |
| DS | Baicalin                                              | GPER1    | 0.8125 |
| DS | Baicalin                                              | HCK      | 0.875  |
| DS | Baicalin                                              | HIBCH    | 0.875  |
| DS | Baicalin                                              | HSP90AA1 | 0.875  |
| DS | Baicalin                                              | HSPA2    | 0.875  |
| DS | Baicalin                                              | IGHG1    | 0.8125 |
| DS | Baicalin                                              | JAK1     | 0.875  |
| DS | Baicalin                                              | NCOA1    | 0.8125 |
| DS | Baicalin                                              | NCOA2    | 0.8125 |
| DS | Baicalin                                              | NQO2     | 0.875  |
| DS | Baicalin                                              | NR1I2    | 0.875  |
| DS | Baicalin                                              | PIK3CG   | 0.875  |
| DS | Baicalin                                              | PIM1     | 0.875  |
| DS | Baicalin                                              | PRKACA   | 0.9062 |
| DS | Baicalin                                              | PRKCA    | 0.9062 |
| DS | Baicalin                                              | PRKCB    | 0.9062 |
| DS | Baicalin                                              | PTK2B    | 0.8125 |
| DS | Baicalin                                              | RUVBL2   | 0.875  |
| DS | Baicalin                                              | SF3B3    | 0.875  |
| DS | Baicalin                                              | SHBG     | 0.875  |
| DS | Baicalin                                              | SQLE     | 0.9062 |
| DS | Baicalin                                              | STK17B   | 0.875  |
| DS | Baicalin                                              | SYK      | 0.9062 |
| DS | Baicalin                                              | TOP2A    | 0.8125 |
| DS | Baicalin                                              | UBA1     | 0.875  |
| DS | Baicalin                                              | UGT3A1   | 0.875  |
| DS | Danshenol B                                           | ANXA1    | 0.8039 |
| DS | Danshenol B                                           | HSD11B2  | 0.8039 |
| DS | Danshenol B                                           | HSD3B1   | 0.8039 |
| DS | Danshenol B                                           | NR3C1    | 0.8654 |
| DS | Danshenol B                                           | SMO      | 0.8    |
| DS | Ferruginol                                            | ALOX5    | 0.8    |
| DS | Ferruginol                                            | DGKA     | 0.8    |
| DS | Ferruginol                                            | NR1I2    | 0.8    |
| DS | Ferruginol                                            | PPP2CA   | 0.8    |
| DS | Ferruginol                                            | PPP2CB   | 0.8    |
| DS | Ferruginol                                            | PRKCA    | 0.8    |
| DS | Ferruginol                                            | PRKCB    | 0.8    |
| DS | Ferruginol                                            | SEC14L2  | 0.8    |
| DS | Ferruginol                                            | SEC14L3  | 0.8    |
| DS | Ferruginol                                            | SEC14L4  | 0.8    |
| DS | Hesperetic Acid                                       | MIF      | 0.8333 |
| DS | Hesperetic Acid                                       | SHBG     | 0.8    |
| DS | 2-Isopropyl-8-Methylphenanthrene-3,4-Dione(R0-090680) | BGLAP    | 0.8261 |
| DS | 2-Isopropyl-8-Methylphenanthrene-3,4-Dione(R0-090680) | F10      | 0.8261 |
| DS | 2-Isopropyl-8-Methylphenanthrene-3,4-Dione(R0-090680) | F2       | 0.8261 |

|    |                                                       |          |        |
|----|-------------------------------------------------------|----------|--------|
| DS | 2-Isopropyl-8-Methylphenanthrene-3,4-Dione(R0-090680) | F7       | 0.8261 |
| DS | 2-Isopropyl-8-Methylphenanthrene-3,4-Dione(R0-090680) | F9       | 0.8261 |
| DS | 2-Isopropyl-8-Methylphenanthrene-3,4-Dione(R0-090680) | GGCX     | 0.8261 |
| DS | 2-Isopropyl-8-Methylphenanthrene-3,4-Dione(R0-090680) | NQO1     | 0.8261 |
| DS | 2-Isopropyl-8-Methylphenanthrene-3,4-Dione(R0-090680) | NQO2     | 0.8261 |
| DS | 2-Isopropyl-8-Methylphenanthrene-3,4-Dione(R0-090680) | PROC     | 0.8261 |
| DS | 2-Isopropyl-8-Methylphenanthrene-3,4-Dione(R0-090680) | PROS1    | 0.8261 |
| DS | 2-Isopropyl-8-Methylphenanthrene-3,4-Dione(R0-090680) | PROZ     | 0.8261 |
| DS | 2-Isopropyl-8-Methylphenanthrene-3,4-Dione(R0-090680) | VKORC1   | 0.8261 |
| DS | 2-Isopropyl-8-Methylphenanthrene-3,4-Dione(R0-090680) | VKORC1L1 | 0.8261 |
| DS | 1-Keto-Isocryptotanshinone                            | RBP3     | 0.8095 |
| DS | Miltionone I                                          | RBP3     | 0.8205 |
| DS | Miltionone Ii                                         | NR3C1    | 0.84   |
| DS | Miltipolone                                           | ALOX5    | 0.8095 |
| DS | Miltipolone                                           | DGKA     | 0.8095 |
| DS | Miltipolone                                           | NR1I2    | 0.8095 |
| DS | Miltipolone                                           | PPP2CA   | 0.8095 |
| DS | Miltipolone                                           | PPP2CB   | 0.8095 |
| DS | Miltipolone                                           | PRKCA    | 0.8095 |
| DS | Miltipolone                                           | PRKCB    | 0.8095 |
| DS | Miltipolone                                           | SEC14L2  | 0.8095 |
| DS | Miltipolone                                           | SEC14L3  | 0.8095 |
| DS | Miltipolone                                           | SEC14L4  | 0.8095 |
| DS | Miltirone                                             | BGLAP    | 0.8485 |
| DS | Miltirone                                             | GGCX     | 0.8485 |
| DS | Neocryptotanshinone Ii                                | ALOX5    | 0.8    |
| DS | Neocryptotanshinone Ii                                | NR1I2    | 0.8    |
| DS | Neocryptotanshinone Ii                                | PTGS1    | 0.8    |
| DS | Oleoyl Danshenxinkun A                                | ANXA1    | 0.8511 |
| DS | Oleoyl Danshenxinkun A                                | HSD11B2  | 0.8511 |
| DS | Oleoyl Danshenxinkun A                                | HSD3B1   | 0.8511 |
| DS | Oleoyl Danshenxinkun A                                | NR3C1    | 0.8511 |
| DS | Oleoyl Neocryptotanshinone                            | ANXA1    | 0.875  |
| DS | Oleoyl Neocryptotanshinone                            | HMGCR    | 0.8    |
| DS | Oleoyl Neocryptotanshinone                            | HSD11B2  | 0.875  |

|    |                                                        |         |        |
|----|--------------------------------------------------------|---------|--------|
| DS | Oleoyl Neocryptotanshinone                             | HSD3B1  | 0.875  |
| DS | Oleoyl Neocryptotanshinone                             | IL1B    | 0.8039 |
| DS | Oleoyl Neocryptotanshinone                             | ITGAL   | 0.8    |
| DS | Oleoyl Neocryptotanshinone                             | ITGB2   | 0.8    |
| DS | Oleoyl Neocryptotanshinone                             | NR3C1   | 0.875  |
| DS | Oleoyl Neocryptotanshinone                             | NR3C2   | 0.8298 |
| DS | Rosmarinic Acid Methyl Ester                           | ABCC5   | 0.8125 |
| DS | Rosmarinic Acid Methyl Ester                           | CBR1    | 0.8125 |
| DS | Rosmarinic Acid Methyl Ester                           | GSTP1   | 0.8125 |
| DS | Rosmarinic Acid Methyl Ester                           | PPARG   | 0.8125 |
| DS | Rosmarinic Acid Methyl Ester                           | VDR     | 0.8125 |
| DS | Salvianolic Acid A                                     | PYGM    | 0.8    |
| DS | Salvianolic Acid D                                     | PYGM    | 0.8333 |
| DS | Salviol                                                | ALOX5   | 0.8108 |
| DS | Salviol                                                | ATP6    | 0.8286 |
| DS | Salviol                                                | BECN1   | 0.8286 |
| DS | Salviol                                                | CHRNA4  | 0.8286 |
| DS | Salviol                                                | DGKA    | 0.8108 |
| DS | Salviol                                                | ESR1    | 0.8571 |
| DS | Salviol                                                | ESR2    | 0.8286 |
| DS | Salviol                                                | ESRRG   | 0.8286 |
| DS | Salviol                                                | GPER1   | 0.8286 |
| DS | Salviol                                                | HSD17B2 | 0.8286 |
| DS | Salviol                                                | NCOA2   | 0.8571 |
| DS | Salviol                                                | NR1I2   | 0.8286 |
| DS | Salviol                                                | PPP2CA  | 0.8108 |
| DS | Salviol                                                | PPP2CB  | 0.8108 |
| DS | Salviol                                                | PRKCA   | 0.8108 |
| DS | Salviol                                                | PRKCB   | 0.8108 |
| DS | Salviol                                                | SEC14L2 | 0.8108 |
| DS | Salviol                                                | SEC14L3 | 0.8108 |
| DS | Salviol                                                | SEC14L4 | 0.8108 |
| DS | Salviol                                                | SHBG    | 0.8056 |
| DS | (25R)-5 $\beta$ -Spirostan-3 $\beta$ -<br>Ol,Tigogenin | AR      | 0.9    |
| HH | Sitosterol, $\beta$ -Sitosterol                        | AKR1C1  | 0.8158 |
| HH | Sitosterol, $\beta$ -Sitosterol                        | AKR1C2  | 0.8158 |
| HH | Sitosterol, $\beta$ -Sitosterol                        | AR      | 0.8421 |
| HH | Sitosterol, $\beta$ -Sitosterol                        | CLEC4E  | 0.9714 |
| HH | Sitosterol, $\beta$ -Sitosterol                        | ESR1    | 0.8421 |
| HH | Sitosterol, $\beta$ -Sitosterol                        | ESR2    | 0.8378 |
| HH | Sitosterol, $\beta$ -Sitosterol                        | GABRA1  | 0.8378 |
| HH | Sitosterol, $\beta$ -Sitosterol                        | GABRA2  | 0.8378 |
| HH | Sitosterol, $\beta$ -Sitosterol                        | GABRA3  | 0.8378 |
| HH | Sitosterol, $\beta$ -Sitosterol                        | GABRA4  | 0.8378 |
| HH | Sitosterol, $\beta$ -Sitosterol                        | GABRA5  | 0.8378 |
| HH | Sitosterol, $\beta$ -Sitosterol                        | GABRA6  | 0.8378 |
| HH | Sitosterol, $\beta$ -Sitosterol                        | GABRB1  | 0.8378 |
| HH | Sitosterol, $\beta$ -Sitosterol                        | GABRB2  | 0.8378 |
| HH | Sitosterol, $\beta$ -Sitosterol                        | GABRB3  | 0.8378 |
| HH | Sitosterol, $\beta$ -Sitosterol                        | GABRD   | 0.8378 |
| HH | Sitosterol, $\beta$ -Sitosterol                        | GABRE   | 0.8378 |
| HH | Sitosterol, $\beta$ -Sitosterol                        | GABRG1  | 0.8378 |
| HH | Sitosterol, $\beta$ -Sitosterol                        | GABRG2  | 0.8378 |
| HH | Sitosterol, $\beta$ -Sitosterol                        | GABRG3  | 0.8378 |

|    |                                                                  |         |        |
|----|------------------------------------------------------------------|---------|--------|
| HH | Sitosterol, $\hat{I}^{\wedge}$ -Sitosterol                       | GABRP   | 0.8378 |
| HH | Sitosterol, $\hat{I}^{\wedge}$ -Sitosterol                       | GABRQ   | 0.8378 |
| HH | Sitosterol, $\hat{I}^{\wedge}$ -Sitosterol                       | GRIN1   | 0.8378 |
| HH | Sitosterol, $\hat{I}^{\wedge}$ -Sitosterol                       | GRIN2A  | 0.8378 |
| HH | Sitosterol, $\hat{I}^{\wedge}$ -Sitosterol                       | GRIN2B  | 0.8378 |
| HH | Sitosterol, $\hat{I}^{\wedge}$ -Sitosterol                       | GRIN2C  | 0.8378 |
| HH | Sitosterol, $\hat{I}^{\wedge}$ -Sitosterol                       | GRIN2D  | 0.8378 |
| HH | Sitosterol, $\hat{I}^{\wedge}$ -Sitosterol                       | GRIN3A  | 0.8378 |
| HH | Sitosterol, $\hat{I}^{\wedge}$ -Sitosterol                       | GRIN3B  | 0.8378 |
| HH | Sitosterol, $\hat{I}^{\wedge}$ -Sitosterol                       | HSD17B1 | 0.8378 |
| HH | Sitosterol, $\hat{I}^{\wedge}$ -Sitosterol                       | LIP3    | 0.8205 |
| HH | Sitosterol, $\hat{I}^{\wedge}$ -Sitosterol                       | LSS     | 0.9444 |
| HH | Sitosterol, $\hat{I}^{\wedge}$ -Sitosterol                       | NCOA2   | 0.8158 |
| HH | Sitosterol, $\hat{I}^{\wedge}$ -Sitosterol                       | NR1I2   | 0.8649 |
| HH | Sitosterol, $\hat{I}^{\wedge}$ -Sitosterol                       | NR1I3   | 0.9714 |
| HH | Sitosterol, $\hat{I}^{\wedge}$ -Sitosterol                       | NR3C1   | 0.825  |
| HH | Sitosterol, $\hat{I}^{\wedge}$ -Sitosterol                       | NR3C2   | 0.8158 |
| HH | Sitosterol, $\hat{I}^{\wedge}$ -Sitosterol                       | PGR     | 0.8378 |
| HH | Sitosterol, $\hat{I}^{\wedge}$ -Sitosterol                       | PPARA   | 0.8378 |
| HH | Sitosterol, $\hat{I}^{\wedge}$ -Sitosterol                       | RORA    | 0.9714 |
| HH | Sitosterol, $\hat{I}^{\wedge}$ -Sitosterol                       | SIGMAR1 | 0.8378 |
| HH | Sitosterol, $\hat{I}^{\wedge}$ -Sitosterol                       | SULT2A1 | 0.8378 |
| HH | Sitosterol, $\hat{I}^{\wedge}$ -Sitosterol                       | SULT2B1 | 0.8649 |
| HH | Sitosterol, $\hat{I}^{\wedge}$ -Sitosterol                       | VDR     | 0.9714 |
| HH | Cis-9,Cis-12-Linoleic<br>Acid,Inositol,Linoleic,Linoleic<br>Acid | ABL1    | 0.9524 |
| HH | Cis-9,Cis-12-Linoleic<br>Acid,Inositol,Linoleic,Linoleic<br>Acid | ACSL3   | 0.9048 |
| HH | Cis-9,Cis-12-Linoleic<br>Acid,Inositol,Linoleic,Linoleic<br>Acid | ACSL4   | 0.9048 |
| HH | Cis-9,Cis-12-Linoleic<br>Acid,Inositol,Linoleic,Linoleic<br>Acid | ADH5    | 0.9524 |
| HH | Cis-9,Cis-12-Linoleic<br>Acid,Inositol,Linoleic,Linoleic<br>Acid | ARF1    | 0.9524 |
| HH | Cis-9,Cis-12-Linoleic<br>Acid,Inositol,Linoleic,Linoleic<br>Acid | ARF6    | 0.9524 |
| HH | Cis-9,Cis-12-Linoleic<br>Acid,Inositol,Linoleic,Linoleic<br>Acid | C8G     | 0.9524 |
| HH | Cis-9,Cis-12-Linoleic<br>Acid,Inositol,Linoleic,Linoleic<br>Acid | CALM1   | 0.9524 |
| HH | Cis-9,Cis-12-Linoleic<br>Acid,Inositol,Linoleic,Linoleic<br>Acid | CNR1    | 0.875  |
| HH | Cis-9,Cis-12-Linoleic<br>Acid,Inositol,Linoleic,Linoleic<br>Acid | CNR2    | 0.875  |

|    |                                                                  |        |        |
|----|------------------------------------------------------------------|--------|--------|
| HH | Cis-9,Cis-12-Linoleic<br>Acid,Inositol,Linoleic,Linoleic<br>Acid | CYP2C8 | 0.9524 |
| HH | Cis-9,Cis-12-Linoleic<br>Acid,Inositol,Linoleic,Linoleic<br>Acid | ECI2   | 0.9524 |
| HH | Cis-9,Cis-12-Linoleic<br>Acid,Inositol,Linoleic,Linoleic<br>Acid | ELOVL4 | 0.9048 |
| HH | Cis-9,Cis-12-Linoleic<br>Acid,Inositol,Linoleic,Linoleic<br>Acid | FADS1  | 0.9048 |
| HH | Cis-9,Cis-12-Linoleic<br>Acid,Inositol,Linoleic,Linoleic<br>Acid | FADS2  | 0.9048 |
| HH | Cis-9,Cis-12-Linoleic<br>Acid,Inositol,Linoleic,Linoleic<br>Acid | FFAR1  | 0.9048 |
| HH | Cis-9,Cis-12-Linoleic<br>Acid,Inositol,Linoleic,Linoleic<br>Acid | FKBP1A | 0.9524 |
| HH | Cis-9,Cis-12-Linoleic<br>Acid,Inositol,Linoleic,Linoleic<br>Acid | FURIN  | 0.9524 |
| HH | Cis-9,Cis-12-Linoleic<br>Acid,Inositol,Linoleic,Linoleic<br>Acid | GLTP   | 1      |
| HH | Cis-9,Cis-12-Linoleic<br>Acid,Inositol,Linoleic,Linoleic<br>Acid | GM2A   | 0.9524 |
| HH | Cis-9,Cis-12-Linoleic<br>Acid,Inositol,Linoleic,Linoleic<br>Acid | GUCA1A | 0.9524 |
| HH | Cis-9,Cis-12-Linoleic<br>Acid,Inositol,Linoleic,Linoleic<br>Acid | HNF4A  | 0.9524 |
| HH | Cis-9,Cis-12-Linoleic<br>Acid,Inositol,Linoleic,Linoleic<br>Acid | HNF4G  | 0.9524 |
| HH | Cis-9,Cis-12-Linoleic<br>Acid,Inositol,Linoleic,Linoleic<br>Acid | INS    | 0.9524 |
| HH | Cis-9,Cis-12-Linoleic<br>Acid,Inositol,Linoleic,Linoleic<br>Acid | LALBA  | 0.9524 |
| HH | Cis-9,Cis-12-Linoleic<br>Acid,Inositol,Linoleic,Linoleic<br>Acid | LIP3   | 0.9524 |
| HH | Cis-9,Cis-12-Linoleic<br>Acid,Inositol,Linoleic,Linoleic<br>Acid | LTB4R  | 0.84   |
| HH | Cis-9,Cis-12-Linoleic<br>Acid,Inositol,Linoleic,Linoleic<br>Acid | LTB4R2 | 0.84   |

|    |                                                            |             |        |
|----|------------------------------------------------------------|-------------|--------|
| HH | Cis-9,Cis-12-Linoleic Acid,Inositol,Linoleic,Linoleic Acid | LTF         | 0.9524 |
| HH | Cis-9,Cis-12-Linoleic Acid,Inositol,Linoleic,Linoleic Acid | LY96        | 0.9524 |
| HH | Cis-9,Cis-12-Linoleic Acid,Inositol,Linoleic,Linoleic Acid | NCOA1       | 0.9524 |
| HH | Cis-9,Cis-12-Linoleic Acid,Inositol,Linoleic,Linoleic Acid | NR1H4       | 1      |
| HH | Cis-9,Cis-12-Linoleic Acid,Inositol,Linoleic,Linoleic Acid | PAEP        | 0.9524 |
| HH | Cis-9,Cis-12-Linoleic Acid,Inositol,Linoleic,Linoleic Acid | PKIA        | 0.9524 |
| HH | Cis-9,Cis-12-Linoleic Acid,Inositol,Linoleic,Linoleic Acid | PLA2G1B     | 0.9524 |
| HH | Cis-9,Cis-12-Linoleic Acid,Inositol,Linoleic,Linoleic Acid | PLA2G2A     | 0.9524 |
| HH | Cis-9,Cis-12-Linoleic Acid,Inositol,Linoleic,Linoleic Acid | PLA2G2D     | 0.9524 |
| HH | Cis-9,Cis-12-Linoleic Acid,Inositol,Linoleic,Linoleic Acid | PLA2G2E     | 0.9524 |
| HH | Cis-9,Cis-12-Linoleic Acid,Inositol,Linoleic,Linoleic Acid | PMP2        | 1      |
| HH | Cis-9,Cis-12-Linoleic Acid,Inositol,Linoleic,Linoleic Acid | PPARA       | 1      |
| HH | Cis-9,Cis-12-Linoleic Acid,Inositol,Linoleic,Linoleic Acid | PPARD       | 1      |
| HH | Cis-9,Cis-12-Linoleic Acid,Inositol,Linoleic,Linoleic Acid | PPARG       | 1      |
| HH | Cis-9,Cis-12-Linoleic Acid,Inositol,Linoleic,Linoleic Acid | PPA_RS05235 | 1      |
| HH | Cis-9,Cis-12-Linoleic Acid,Inositol,Linoleic,Linoleic Acid | PPP3CA      | 0.9524 |
| HH | Cis-9,Cis-12-Linoleic Acid,Inositol,Linoleic,Linoleic Acid | PPP3R1      | 0.9524 |
| HH | Cis-9,Cis-12-Linoleic Acid,Inositol,Linoleic,Linoleic Acid | PPT1        | 0.9524 |

|    |                                                                  |         |        |
|----|------------------------------------------------------------------|---------|--------|
| HH | Cis-9,Cis-12-Linoleic<br>Acid,Inositol,Linoleic,Linoleic<br>Acid | PRKACA  | 0.9524 |
| HH | Cis-9,Cis-12-Linoleic<br>Acid,Inositol,Linoleic,Linoleic<br>Acid | PTGS1   | 1      |
| HH | Cis-9,Cis-12-Linoleic<br>Acid,Inositol,Linoleic,Linoleic<br>Acid | PTGS2   | 1      |
| HH | Cis-9,Cis-12-Linoleic<br>Acid,Inositol,Linoleic,Linoleic<br>Acid | PVR     | 0.9524 |
| HH | Cis-9,Cis-12-Linoleic<br>Acid,Inositol,Linoleic,Linoleic<br>Acid | RCVRN   | 0.9524 |
| HH | Cis-9,Cis-12-Linoleic<br>Acid,Inositol,Linoleic,Linoleic<br>Acid | RHO     | 0.9524 |
| HH | Cis-9,Cis-12-Linoleic<br>Acid,Inositol,Linoleic,Linoleic<br>Acid | RXRA    | 1      |
| HH | Cis-9,Cis-12-Linoleic<br>Acid,Inositol,Linoleic,Linoleic<br>Acid | RXRB    | 0.8571 |
| HH | Cis-9,Cis-12-Linoleic<br>Acid,Inositol,Linoleic,Linoleic<br>Acid | RXRG    | 0.8571 |
| HH | Cis-9,Cis-12-Linoleic<br>Acid,Inositol,Linoleic,Linoleic<br>Acid | S100B   | 0.8182 |
| HH | Cis-9,Cis-12-Linoleic<br>Acid,Inositol,Linoleic,Linoleic<br>Acid | SEC14L2 | 0.9524 |
| HH | Cis-9,Cis-12-Linoleic<br>Acid,Inositol,Linoleic,Linoleic<br>Acid | SLC8A1  | 0.9048 |
| HH | Cis-9,Cis-12-Linoleic<br>Acid,Inositol,Linoleic,Linoleic<br>Acid | SREBF1  | 0.8571 |
| HH | Cis-9,Cis-12-Linoleic<br>Acid,Inositol,Linoleic,Linoleic<br>Acid | TLR4    | 0.9524 |
| HH | Cis-9,Cis-12-Linoleic<br>Acid,Inositol,Linoleic,Linoleic<br>Acid | TM1468  | 0.9524 |
| HH | Cis-9,Cis-12-Linoleic<br>Acid,Inositol,Linoleic,Linoleic<br>Acid | TRAPPC3 | 0.9524 |
| HH | Cis-9,Cis-12-Linoleic<br>Acid,Inositol,Linoleic,Linoleic<br>Acid | TRPV1   | 0.9048 |
| HH | Cis-9,Cis-12-Linoleic<br>Acid,Inositol,Linoleic,Linoleic<br>Acid | VLDLR   | 0.9524 |



|    |                                                 |         |        |
|----|-------------------------------------------------|---------|--------|
| HH | Arachic Acid , Eicosanoic Acid , Arachidic Acid | ABAT    | 0.8095 |
| HH | Arachic Acid , Eicosanoic Acid , Arachidic Acid | ABL1    | 1      |
| HH | Arachic Acid , Eicosanoic Acid , Arachidic Acid | ACADSB  | 0.8095 |
| HH | Arachic Acid , Eicosanoic Acid , Arachidic Acid | ACOX1   | 0.8    |
| HH | Arachic Acid , Eicosanoic Acid , Arachidic Acid | ACSL3   | 0.8571 |
| HH | Arachic Acid , Eicosanoic Acid , Arachidic Acid | ACSL4   | 0.8571 |
| HH | Arachic Acid , Eicosanoic Acid , Arachidic Acid | ADH5    | 1      |
| HH | Arachic Acid , Eicosanoic Acid , Arachidic Acid | ALDH5A1 | 0.8095 |
| HH | Arachic Acid , Eicosanoic Acid , Arachidic Acid | ARF1    | 1      |
| HH | Arachic Acid , Eicosanoic Acid , Arachidic Acid | ARF6    | 1      |
| HH | Arachic Acid , Eicosanoic Acid , Arachidic Acid | C8G     | 1      |
| HH | Arachic Acid , Eicosanoic Acid , Arachidic Acid | CALM1   | 1      |
| HH | Arachic Acid , Eicosanoic Acid , Arachidic Acid | CNR1    | 0.8333 |
| HH | Arachic Acid , Eicosanoic Acid , Arachidic Acid | CNR2    | 0.8333 |
| HH | Arachic Acid , Eicosanoic Acid , Arachidic Acid | CYP2C8  | 1      |
| HH | Arachic Acid , Eicosanoic Acid , Arachidic Acid | ECI2    | 1      |
| HH | Arachic Acid , Eicosanoic Acid , Arachidic Acid | ELOVL4  | 0.8571 |
| HH | Arachic Acid , Eicosanoic Acid , Arachidic Acid | FADS1   | 0.8571 |
| HH | Arachic Acid , Eicosanoic Acid , Arachidic Acid | FADS2   | 0.8571 |
| HH | Arachic Acid , Eicosanoic Acid , Arachidic Acid | FFAR1   | 0.8571 |
| HH | Arachic Acid , Eicosanoic Acid , Arachidic Acid | FKBP1A  | 1      |
| HH | Arachic Acid , Eicosanoic Acid , Arachidic Acid | FURIN   | 1      |
| HH | Arachic Acid , Eicosanoic Acid , Arachidic Acid | GLTP    | 1      |
| HH | Arachic Acid , Eicosanoic Acid , Arachidic Acid | GM2A    | 1      |
| HH | Arachic Acid , Eicosanoic Acid , Arachidic Acid | GUCA1A  | 1      |
| HH | Arachic Acid , Eicosanoic Acid , Arachidic Acid | HAO1    | 0.8    |
| HH | Arachic Acid , Eicosanoic Acid , Arachidic Acid | HDAC2   | 0.8095 |

|    |                                                 |             |        |
|----|-------------------------------------------------|-------------|--------|
| HH | Arachic Acid , Eicosanoic Acid , Arachidic Acid | HDAC9       | 0.8095 |
| HH | Arachic Acid , Eicosanoic Acid , Arachidic Acid | HNF4A       | 1      |
| HH | Arachic Acid , Eicosanoic Acid , Arachidic Acid | HNF4G       | 1      |
| HH | Arachic Acid , Eicosanoic Acid , Arachidic Acid | INS         | 1      |
| HH | Arachic Acid , Eicosanoic Acid , Arachidic Acid | LALBA       | 1      |
| HH | Arachic Acid , Eicosanoic Acid , Arachidic Acid | LIP3        | 1      |
| HH | Arachic Acid , Eicosanoic Acid , Arachidic Acid | LTB4R       | 0.8    |
| HH | Arachic Acid , Eicosanoic Acid , Arachidic Acid | LTB4R2      | 0.8    |
| HH | Arachic Acid , Eicosanoic Acid , Arachidic Acid | LTF         | 1      |
| HH | Arachic Acid , Eicosanoic Acid , Arachidic Acid | LY96        | 1      |
| HH | Arachic Acid , Eicosanoic Acid , Arachidic Acid | NCOA1       | 1      |
| HH | Arachic Acid , Eicosanoic Acid , Arachidic Acid | NR1H4       | 0.9524 |
| HH | Arachic Acid , Eicosanoic Acid , Arachidic Acid | OGDH        | 0.8095 |
| HH | Arachic Acid , Eicosanoic Acid , Arachidic Acid | PAEP        | 1      |
| HH | Arachic Acid , Eicosanoic Acid , Arachidic Acid | PKIA        | 1      |
| HH | Arachic Acid , Eicosanoic Acid , Arachidic Acid | PLA2G1B     | 1      |
| HH | Arachic Acid , Eicosanoic Acid , Arachidic Acid | PLA2G2A     | 1      |
| HH | Arachic Acid , Eicosanoic Acid , Arachidic Acid | PLA2G2D     | 1      |
| HH | Arachic Acid , Eicosanoic Acid , Arachidic Acid | PLA2G2E     | 1      |
| HH | Arachic Acid , Eicosanoic Acid , Arachidic Acid | PMP2        | 1      |
| HH | Arachic Acid , Eicosanoic Acid , Arachidic Acid | PPARA       | 1      |
| HH | Arachic Acid , Eicosanoic Acid , Arachidic Acid | PPARD       | 0.9524 |
| HH | Arachic Acid , Eicosanoic Acid , Arachidic Acid | PPARG       | 1      |
| HH | Arachic Acid , Eicosanoic Acid , Arachidic Acid | PPA_RS05235 | 0.9524 |
| HH | Arachic Acid , Eicosanoic Acid , Arachidic Acid | PPP3CA      | 1      |
| HH | Arachic Acid , Eicosanoic Acid , Arachidic Acid | PPP3R1      | 1      |
| HH | Arachic Acid , Eicosanoic Acid , Arachidic Acid | PPT1        | 1      |

|    |                                                 |         |        |
|----|-------------------------------------------------|---------|--------|
| HH | Arachic Acid , Eicosanoic Acid , Arachidic Acid | PRKACA  | 1      |
| HH | Arachic Acid , Eicosanoic Acid , Arachidic Acid | PTGS1   | 0.9524 |
| HH | Arachic Acid , Eicosanoic Acid , Arachidic Acid | PTGS2   | 0.9524 |
| HH | Arachic Acid , Eicosanoic Acid , Arachidic Acid | PVR     | 1      |
| HH | Arachic Acid , Eicosanoic Acid , Arachidic Acid | RCVRN   | 1      |
| HH | Arachic Acid , Eicosanoic Acid , Arachidic Acid | RHO     | 1      |
| HH | Arachic Acid , Eicosanoic Acid , Arachidic Acid | RXRA    | 0.9524 |
| HH | Arachic Acid , Eicosanoic Acid , Arachidic Acid | RXRB    | 0.8095 |
| HH | Arachic Acid , Eicosanoic Acid , Arachidic Acid | RXRG    | 0.8095 |
| HH | Arachic Acid , Eicosanoic Acid , Arachidic Acid | S100B   | 0.8571 |
| HH | Arachic Acid , Eicosanoic Acid , Arachidic Acid | SCN10A  | 0.8095 |
| HH | Arachic Acid , Eicosanoic Acid , Arachidic Acid | SCN11A  | 0.8095 |
| HH | Arachic Acid , Eicosanoic Acid , Arachidic Acid | SCN1A   | 0.8095 |
| HH | Arachic Acid , Eicosanoic Acid , Arachidic Acid | SCN1B   | 0.8095 |
| HH | Arachic Acid , Eicosanoic Acid , Arachidic Acid | SCN2A   | 0.8095 |
| HH | Arachic Acid , Eicosanoic Acid , Arachidic Acid | SCN2B   | 0.8095 |
| HH | Arachic Acid , Eicosanoic Acid , Arachidic Acid | SCN3A   | 0.8095 |
| HH | Arachic Acid , Eicosanoic Acid , Arachidic Acid | SCN3B   | 0.8095 |
| HH | Arachic Acid , Eicosanoic Acid , Arachidic Acid | SCN4A   | 0.8095 |
| HH | Arachic Acid , Eicosanoic Acid , Arachidic Acid | SCN4B   | 0.8095 |
| HH | Arachic Acid , Eicosanoic Acid , Arachidic Acid | SCN5A   | 0.8095 |
| HH | Arachic Acid , Eicosanoic Acid , Arachidic Acid | SCN7A   | 0.8095 |
| HH | Arachic Acid , Eicosanoic Acid , Arachidic Acid | SCN8A   | 0.8095 |
| HH | Arachic Acid , Eicosanoic Acid , Arachidic Acid | SCN9A   | 0.8095 |
| HH | Arachic Acid , Eicosanoic Acid , Arachidic Acid | SEC14L2 | 1      |
| HH | Arachic Acid , Eicosanoic Acid , Arachidic Acid | SLC8A1  | 0.8571 |
| HH | Arachic Acid , Eicosanoic Acid , Arachidic Acid | SREBF1  | 0.8095 |

|    |                                                 |         |        |
|----|-------------------------------------------------|---------|--------|
| HH | Arachic Acid , Eicosanoic Acid , Arachidic Acid | TLR4    | 1      |
| HH | Arachic Acid , Eicosanoic Acid , Arachidic Acid | TM1468  | 1      |
| HH | Arachic Acid , Eicosanoic Acid , Arachidic Acid | TRAPPC3 | 1      |
| HH | Arachic Acid , Eicosanoic Acid , Arachidic Acid | TRPV1   | 0.8571 |
| HH | Arachic Acid , Eicosanoic Acid , Arachidic Acid | VLDLR   | 1      |
| HH | Cetylic Acid,Hexadecanoic Acid,Palmitic Acid    | ABAT    | 0.8095 |
| HH | Cetylic Acid,Hexadecanoic Acid,Palmitic Acid    | ABL1    | 1      |
| HH | Cetylic Acid,Hexadecanoic Acid,Palmitic Acid    | ACADSB  | 0.8095 |
| HH | Cetylic Acid,Hexadecanoic Acid,Palmitic Acid    | ACOX1   | 0.8    |
| HH | Cetylic Acid,Hexadecanoic Acid,Palmitic Acid    | ACSL3   | 0.8571 |
| HH | Cetylic Acid,Hexadecanoic Acid,Palmitic Acid    | ACSL4   | 0.8571 |
| HH | Cetylic Acid,Hexadecanoic Acid,Palmitic Acid    | ADH5    | 1      |
| HH | Cetylic Acid,Hexadecanoic Acid,Palmitic Acid    | ALDH5A1 | 0.8095 |
| HH | Cetylic Acid,Hexadecanoic Acid,Palmitic Acid    | ARF1    | 1      |
| HH | Cetylic Acid,Hexadecanoic Acid,Palmitic Acid    | ARF6    | 1      |
| HH | Cetylic Acid,Hexadecanoic Acid,Palmitic Acid    | C8G     | 1      |
| HH | Cetylic Acid,Hexadecanoic Acid,Palmitic Acid    | CALM1   | 1      |
| HH | Cetylic Acid,Hexadecanoic Acid,Palmitic Acid    | CNR1    | 0.8333 |
| HH | Cetylic Acid,Hexadecanoic Acid,Palmitic Acid    | CNR2    | 0.8333 |
| HH | Cetylic Acid,Hexadecanoic Acid,Palmitic Acid    | CYP2C8  | 1      |
| HH | Cetylic Acid,Hexadecanoic Acid,Palmitic Acid    | ECI2    | 1      |
| HH | Cetylic Acid,Hexadecanoic Acid,Palmitic Acid    | ELOVL4  | 0.8571 |
| HH | Cetylic Acid,Hexadecanoic Acid,Palmitic Acid    | FADS1   | 0.8571 |
| HH | Cetylic Acid,Hexadecanoic Acid,Palmitic Acid    | FADS2   | 0.8571 |
| HH | Cetylic Acid,Hexadecanoic Acid,Palmitic Acid    | FFAR1   | 0.8571 |
| HH | Cetylic Acid,Hexadecanoic Acid,Palmitic Acid    | FKBP1A  | 1      |
| HH | Cetylic Acid,Hexadecanoic Acid,Palmitic Acid    | FURIN   | 1      |

|    |                                              |         |        |
|----|----------------------------------------------|---------|--------|
| HH | Cetylic Acid,Hexadecanoic Acid,Palmitic Acid | GLTP    | 1      |
| HH | Cetylic Acid,Hexadecanoic Acid,Palmitic Acid | GM2A    | 1      |
| HH | Cetylic Acid,Hexadecanoic Acid,Palmitic Acid | GUCA1A  | 1      |
| HH | Cetylic Acid,Hexadecanoic Acid,Palmitic Acid | HAO1    | 0.8    |
| HH | Cetylic Acid,Hexadecanoic Acid,Palmitic Acid | HDAC2   | 0.8095 |
| HH | Cetylic Acid,Hexadecanoic Acid,Palmitic Acid | HDAC9   | 0.8095 |
| HH | Cetylic Acid,Hexadecanoic Acid,Palmitic Acid | HNF4A   | 1      |
| HH | Cetylic Acid,Hexadecanoic Acid,Palmitic Acid | HNF4G   | 1      |
| HH | Cetylic Acid,Hexadecanoic Acid,Palmitic Acid | INS     | 1      |
| HH | Cetylic Acid,Hexadecanoic Acid,Palmitic Acid | LALBA   | 1      |
| HH | Cetylic Acid,Hexadecanoic Acid,Palmitic Acid | LIP3    | 1      |
| HH | Cetylic Acid,Hexadecanoic Acid,Palmitic Acid | LTB4R   | 0.8    |
| HH | Cetylic Acid,Hexadecanoic Acid,Palmitic Acid | LTB4R2  | 0.8    |
| HH | Cetylic Acid,Hexadecanoic Acid,Palmitic Acid | LTF     | 1      |
| HH | Cetylic Acid,Hexadecanoic Acid,Palmitic Acid | LY96    | 1      |
| HH | Cetylic Acid,Hexadecanoic Acid,Palmitic Acid | NCOA1   | 1      |
| HH | Cetylic Acid,Hexadecanoic Acid,Palmitic Acid | NR1H4   | 0.9524 |
| HH | Cetylic Acid,Hexadecanoic Acid,Palmitic Acid | OGDH    | 0.8095 |
| HH | Cetylic Acid,Hexadecanoic Acid,Palmitic Acid | PAEP    | 1      |
| HH | Cetylic Acid,Hexadecanoic Acid,Palmitic Acid | PKIA    | 1      |
| HH | Cetylic Acid,Hexadecanoic Acid,Palmitic Acid | PLA2G1B | 1      |
| HH | Cetylic Acid,Hexadecanoic Acid,Palmitic Acid | PLA2G2A | 1      |
| HH | Cetylic Acid,Hexadecanoic Acid,Palmitic Acid | PLA2G2D | 1      |
| HH | Cetylic Acid,Hexadecanoic Acid,Palmitic Acid | PLA2G2E | 1      |
| HH | Cetylic Acid,Hexadecanoic Acid,Palmitic Acid | PMP2    | 1      |
| HH | Cetylic Acid,Hexadecanoic Acid,Palmitic Acid | PPARA   | 1      |
| HH | Cetylic Acid,Hexadecanoic Acid,Palmitic Acid | PPARD   | 0.9524 |

|    |                                              |             |        |
|----|----------------------------------------------|-------------|--------|
| HH | Cetylic Acid,Hexadecanoic Acid,Palmitic Acid | PPARG       | 1      |
| HH | Cetylic Acid,Hexadecanoic Acid,Palmitic Acid | PPA_RS05235 | 0.9524 |
| HH | Cetylic Acid,Hexadecanoic Acid,Palmitic Acid | PPP3CA      | 1      |
| HH | Cetylic Acid,Hexadecanoic Acid,Palmitic Acid | PPP3R1      | 1      |
| HH | Cetylic Acid,Hexadecanoic Acid,Palmitic Acid | PPT1        | 1      |
| HH | Cetylic Acid,Hexadecanoic Acid,Palmitic Acid | PRKACA      | 1      |
| HH | Cetylic Acid,Hexadecanoic Acid,Palmitic Acid | PTGS1       | 0.9524 |
| HH | Cetylic Acid,Hexadecanoic Acid,Palmitic Acid | PTGS2       | 0.9524 |
| HH | Cetylic Acid,Hexadecanoic Acid,Palmitic Acid | PVR         | 1      |
| HH | Cetylic Acid,Hexadecanoic Acid,Palmitic Acid | RCVRN       | 1      |
| HH | Cetylic Acid,Hexadecanoic Acid,Palmitic Acid | RHO         | 1      |
| HH | Cetylic Acid,Hexadecanoic Acid,Palmitic Acid | RXRA        | 0.9524 |
| HH | Cetylic Acid,Hexadecanoic Acid,Palmitic Acid | RXRB        | 0.8095 |
| HH | Cetylic Acid,Hexadecanoic Acid,Palmitic Acid | RXRG        | 0.8095 |
| HH | Cetylic Acid,Hexadecanoic Acid,Palmitic Acid | S100B       | 0.8571 |
| HH | Cetylic Acid,Hexadecanoic Acid,Palmitic Acid | SCN10A      | 0.8095 |
| HH | Cetylic Acid,Hexadecanoic Acid,Palmitic Acid | SCN11A      | 0.8095 |
| HH | Cetylic Acid,Hexadecanoic Acid,Palmitic Acid | SCN1A       | 0.8095 |
| HH | Cetylic Acid,Hexadecanoic Acid,Palmitic Acid | SCN1B       | 0.8095 |
| HH | Cetylic Acid,Hexadecanoic Acid,Palmitic Acid | SCN2A       | 0.8095 |
| HH | Cetylic Acid,Hexadecanoic Acid,Palmitic Acid | SCN2B       | 0.8095 |
| HH | Cetylic Acid,Hexadecanoic Acid,Palmitic Acid | SCN3A       | 0.8095 |
| HH | Cetylic Acid,Hexadecanoic Acid,Palmitic Acid | SCN3B       | 0.8095 |
| HH | Cetylic Acid,Hexadecanoic Acid,Palmitic Acid | SCN4A       | 0.8095 |
| HH | Cetylic Acid,Hexadecanoic Acid,Palmitic Acid | SCN4B       | 0.8095 |
| HH | Cetylic Acid,Hexadecanoic Acid,Palmitic Acid | SCN5A       | 0.8095 |
| HH | Cetylic Acid,Hexadecanoic Acid,Palmitic Acid | SCN7A       | 0.8095 |

|    |                                              |         |        |
|----|----------------------------------------------|---------|--------|
| HH | Cetylic Acid,Hexadecanoic Acid,Palmitic Acid | SCN8A   | 0.8095 |
| HH | Cetylic Acid,Hexadecanoic Acid,Palmitic Acid | SCN9A   | 0.8095 |
| HH | Cetylic Acid,Hexadecanoic Acid,Palmitic Acid | SEC14L2 | 1      |
| HH | Cetylic Acid,Hexadecanoic Acid,Palmitic Acid | SLC8A1  | 0.8571 |
| HH | Cetylic Acid,Hexadecanoic Acid,Palmitic Acid | SREBF1  | 0.8095 |
| HH | Cetylic Acid,Hexadecanoic Acid,Palmitic Acid | TLR4    | 1      |
| HH | Cetylic Acid,Hexadecanoic Acid,Palmitic Acid | TM1468  | 1      |
| HH | Cetylic Acid,Hexadecanoic Acid,Palmitic Acid | TRAPPC3 | 1      |
| HH | Cetylic Acid,Hexadecanoic Acid,Palmitic Acid | TRPV1   | 0.8571 |
| HH | Cetylic Acid,Hexadecanoic Acid,Palmitic Acid | VLDLR   | 1      |
| HH | Lauric Acid                                  | ABAT    | 0.8095 |
| HH | Lauric Acid                                  | ABL1    | 1      |
| HH | Lauric Acid                                  | ACADSB  | 0.8095 |
| HH | Lauric Acid                                  | ACOX1   | 0.8    |
| HH | Lauric Acid                                  | ACSL3   | 0.8571 |
| HH | Lauric Acid                                  | ACSL4   | 0.8571 |
| HH | Lauric Acid                                  | ADH5    | 1      |
| HH | Lauric Acid                                  | ALDH5A1 | 0.8095 |
| HH | Lauric Acid                                  | ARF1    | 1      |
| HH | Lauric Acid                                  | ARF6    | 1      |
| HH | Lauric Acid                                  | C8G     | 1      |
| HH | Lauric Acid                                  | CALM1   | 1      |
| HH | Lauric Acid                                  | CNR1    | 0.8333 |
| HH | Lauric Acid                                  | CNR2    | 0.8333 |
| HH | Lauric Acid                                  | CYP2C8  | 1      |
| HH | Lauric Acid                                  | ECI2    | 1      |
| HH | Lauric Acid                                  | ELOVL4  | 0.8571 |
| HH | Lauric Acid                                  | FADS1   | 0.8571 |
| HH | Lauric Acid                                  | FADS2   | 0.8571 |
| HH | Lauric Acid                                  | FFAR1   | 0.8571 |
| HH | Lauric Acid                                  | FKBP1A  | 1      |
| HH | Lauric Acid                                  | FURIN   | 1      |
| HH | Lauric Acid                                  | GLTP    | 1      |
| HH | Lauric Acid                                  | GM2A    | 1      |
| HH | Lauric Acid                                  | GUCA1A  | 1      |
| HH | Lauric Acid                                  | HAO1    | 0.8    |
| HH | Lauric Acid                                  | HDAC2   | 0.8095 |
| HH | Lauric Acid                                  | HDAC9   | 0.8095 |
| HH | Lauric Acid                                  | HNF4A   | 1      |
| HH | Lauric Acid                                  | HNF4G   | 1      |
| HH | Lauric Acid                                  | INS     | 1      |
| HH | Lauric Acid                                  | LALBA   | 1      |
| HH | Lauric Acid                                  | LIP3    | 1      |
| HH | Lauric Acid                                  | LTB4R   | 0.8    |
| HH | Lauric Acid                                  | LTB4R2  | 0.8    |

|    |               |             |        |
|----|---------------|-------------|--------|
| HH | Lauric Acid   | LTF         | 1      |
| HH | Lauric Acid   | LY96        | 1      |
| HH | Lauric Acid   | NCOA1       | 1      |
| HH | Lauric Acid   | NR1H4       | 0.9524 |
| HH | Lauric Acid   | OGDH        | 0.8095 |
| HH | Lauric Acid   | PAEP        | 1      |
| HH | Lauric Acid   | PKIA        | 1      |
| HH | Lauric Acid   | PLA2G1B     | 1      |
| HH | Lauric Acid   | PLA2G2A     | 1      |
| HH | Lauric Acid   | PLA2G2D     | 1      |
| HH | Lauric Acid   | PLA2G2E     | 1      |
| HH | Lauric Acid   | PMP2        | 1      |
| HH | Lauric Acid   | PPARA       | 1      |
| HH | Lauric Acid   | PPARD       | 0.9524 |
| HH | Lauric Acid   | PPARG       | 1      |
| HH | Lauric Acid   | PPA_RS05235 | 0.9524 |
| HH | Lauric Acid   | PPP3CA      | 1      |
| HH | Lauric Acid   | PPP3R1      | 1      |
| HH | Lauric Acid   | PPT1        | 1      |
| HH | Lauric Acid   | PRKACA      | 1      |
| HH | Lauric Acid   | PTGS1       | 0.9524 |
| HH | Lauric Acid   | PTGS2       | 0.9524 |
| HH | Lauric Acid   | PVR         | 1      |
| HH | Lauric Acid   | RCVRN       | 1      |
| HH | Lauric Acid   | RHO         | 1      |
| HH | Lauric Acid   | RXRA        | 0.9524 |
| HH | Lauric Acid   | RXRB        | 0.8095 |
| HH | Lauric Acid   | RXRG        | 0.8095 |
| HH | Lauric Acid   | S100B       | 0.8571 |
| HH | Lauric Acid   | SCN10A      | 0.8095 |
| HH | Lauric Acid   | SCN11A      | 0.8095 |
| HH | Lauric Acid   | SCN1A       | 0.8095 |
| HH | Lauric Acid   | SCN1B       | 0.8095 |
| HH | Lauric Acid   | SCN2A       | 0.8095 |
| HH | Lauric Acid   | SCN2B       | 0.8095 |
| HH | Lauric Acid   | SCN3A       | 0.8095 |
| HH | Lauric Acid   | SCN3B       | 0.8095 |
| HH | Lauric Acid   | SCN4A       | 0.8095 |
| HH | Lauric Acid   | SCN4B       | 0.8095 |
| HH | Lauric Acid   | SCN5A       | 0.8095 |
| HH | Lauric Acid   | SCN7A       | 0.8095 |
| HH | Lauric Acid   | SCN8A       | 0.8095 |
| HH | Lauric Acid   | SCN9A       | 0.8095 |
| HH | Lauric Acid   | SEC14L2     | 1      |
| HH | Lauric Acid   | SLC8A1      | 0.8571 |
| HH | Lauric Acid   | SREBF1      | 0.8095 |
| HH | Lauric Acid   | TLR4        | 1      |
| HH | Lauric Acid   | TM1468      | 1      |
| HH | Lauric Acid   | TRAPPC3     | 1      |
| HH | Lauric Acid   | TRPV1       | 0.8571 |
| HH | Lauric Acid   | VLDLR       | 1      |
| HH | Myristic Acid | ABAT        | 0.8095 |
| HH | Myristic Acid | ABL1        | 1      |
| HH | Myristic Acid | ACADSB      | 0.8095 |
| HH | Myristic Acid | ACOX1       | 0.8    |



|    |               |             |        |
|----|---------------|-------------|--------|
| HH | Myristic Acid | ACSL3       | 0.8571 |
| HH | Myristic Acid | ACSL4       | 0.8571 |
| HH | Myristic Acid | ADH5        | 1      |
| HH | Myristic Acid | ALDH5A1     | 0.8095 |
| HH | Myristic Acid | ARF1        | 1      |
| HH | Myristic Acid | ARF6        | 1      |
| HH | Myristic Acid | C8G         | 1      |
| HH | Myristic Acid | CALM1       | 1      |
| HH | Myristic Acid | CNR1        | 0.8333 |
| HH | Myristic Acid | CNR2        | 0.8333 |
| HH | Myristic Acid | CYP2C8      | 1      |
| HH | Myristic Acid | ECI2        | 1      |
| HH | Myristic Acid | ELOVL4      | 0.8571 |
| HH | Myristic Acid | FADS1       | 0.8571 |
| HH | Myristic Acid | FADS2       | 0.8571 |
| HH | Myristic Acid | FFAR1       | 0.8571 |
| HH | Myristic Acid | FKBP1A      | 1      |
| HH | Myristic Acid | FURIN       | 1      |
| HH | Myristic Acid | GLTP        | 1      |
| HH | Myristic Acid | GM2A        | 1      |
| HH | Myristic Acid | GUCA1A      | 1      |
| HH | Myristic Acid | HAO1        | 0.8    |
| HH | Myristic Acid | HDAC2       | 0.8095 |
| HH | Myristic Acid | HDAC9       | 0.8095 |
| HH | Myristic Acid | HNF4A       | 1      |
| HH | Myristic Acid | HNF4G       | 1      |
| HH | Myristic Acid | INS         | 1      |
| HH | Myristic Acid | LALBA       | 1      |
| HH | Myristic Acid | LIP3        | 1      |
| HH | Myristic Acid | LTB4R       | 0.8    |
| HH | Myristic Acid | LTB4R2      | 0.8    |
| HH | Myristic Acid | LTF         | 1      |
| HH | Myristic Acid | LY96        | 1      |
| HH | Myristic Acid | NCOA1       | 1      |
| HH | Myristic Acid | NR1H4       | 0.9524 |
| HH | Myristic Acid | OGDH        | 0.8095 |
| HH | Myristic Acid | PAEP        | 1      |
| HH | Myristic Acid | PKIA        | 1      |
| HH | Myristic Acid | PLA2G1B     | 1      |
| HH | Myristic Acid | PLA2G2A     | 1      |
| HH | Myristic Acid | PLA2G2D     | 1      |
| HH | Myristic Acid | PLA2G2E     | 1      |
| HH | Myristic Acid | PMP2        | 1      |
| HH | Myristic Acid | PPARA       | 1      |
| HH | Myristic Acid | PPARD       | 0.9524 |
| HH | Myristic Acid | PPARG       | 1      |
| HH | Myristic Acid | PPA_RS05235 | 0.9524 |
| HH | Myristic Acid | PPP3CA      | 1      |
| HH | Myristic Acid | PPP3R1      | 1      |
| HH | Myristic Acid | PPT1        | 1      |
| HH | Myristic Acid | PRKACA      | 1      |
| HH | Myristic Acid | PTGS1       | 0.9524 |
| HH | Myristic Acid | PTGS2       | 0.9524 |
| HH | Myristic Acid | PVR         | 1      |
| HH | Myristic Acid | RCVRN       | 1      |

|    |                                |         |        |
|----|--------------------------------|---------|--------|
| HH | Myristic Acid                  | RHO     | 1      |
| HH | Myristic Acid                  | RXRA    | 0.9524 |
| HH | Myristic Acid                  | RXRB    | 0.8095 |
| HH | Myristic Acid                  | RXRG    | 0.8095 |
| HH | Myristic Acid                  | S100B   | 0.8571 |
| HH | Myristic Acid                  | SCN10A  | 0.8095 |
| HH | Myristic Acid                  | SCN11A  | 0.8095 |
| HH | Myristic Acid                  | SCN1A   | 0.8095 |
| HH | Myristic Acid                  | SCN1B   | 0.8095 |
| HH | Myristic Acid                  | SCN2A   | 0.8095 |
| HH | Myristic Acid                  | SCN2B   | 0.8095 |
| HH | Myristic Acid                  | SCN3A   | 0.8095 |
| HH | Myristic Acid                  | SCN3B   | 0.8095 |
| HH | Myristic Acid                  | SCN4A   | 0.8095 |
| HH | Myristic Acid                  | SCN4B   | 0.8095 |
| HH | Myristic Acid                  | SCN5A   | 0.8095 |
| HH | Myristic Acid                  | SCN7A   | 0.8095 |
| HH | Myristic Acid                  | SCN8A   | 0.8095 |
| HH | Myristic Acid                  | SCN9A   | 0.8095 |
| HH | Myristic Acid                  | SEC14L2 | 1      |
| HH | Myristic Acid                  | SLC8A1  | 0.8571 |
| HH | Myristic Acid                  | SREBF1  | 0.8095 |
| HH | Myristic Acid                  | TLR4    | 1      |
| HH | Myristic Acid                  | TM1468  | 1      |
| HH | Myristic Acid                  | TRAPPC3 | 1      |
| HH | Myristic Acid                  | TRPV1   | 0.8571 |
| HH | Myristic Acid                  | VLDLR   | 1      |
| HH | Octadecanoic?Acid,Stearic Acid | ABAT    | 0.8095 |
| HH | Octadecanoic?Acid,Stearic Acid | ABL1    | 1      |
| HH | Octadecanoic?Acid,Stearic Acid | ACADSB  | 0.8095 |
| HH | Octadecanoic?Acid,Stearic Acid | ACOX1   | 0.8    |
| HH | Octadecanoic?Acid,Stearic Acid | ACSL3   | 0.8571 |
| HH | Octadecanoic?Acid,Stearic Acid | ACSL4   | 0.8571 |
| HH | Octadecanoic?Acid,Stearic Acid | ADH5    | 1      |
| HH | Octadecanoic?Acid,Stearic Acid | ALDH5A1 | 0.8095 |
| HH | Octadecanoic?Acid,Stearic Acid | ARF1    | 1      |
| HH | Octadecanoic?Acid,Stearic Acid | ARF6    | 1      |
| HH | Octadecanoic?Acid,Stearic Acid | C8G     | 1      |
| HH | Octadecanoic?Acid,Stearic Acid | CALM1   | 1      |
| HH | Octadecanoic?Acid,Stearic Acid | CNR1    | 0.8333 |
| HH | Octadecanoic?Acid,Stearic Acid | CNR2    | 0.8333 |

|    |                                |        |        |
|----|--------------------------------|--------|--------|
| HH | Octadecanoic?Acid,Stearic Acid | CYP2C8 | 1      |
| HH | Octadecanoic?Acid,Stearic Acid | ECI2   | 1      |
| HH | Octadecanoic?Acid,Stearic Acid | ELOVL4 | 0.8571 |
| HH | Octadecanoic?Acid,Stearic Acid | FADS1  | 0.8571 |
| HH | Octadecanoic?Acid,Stearic Acid | FADS2  | 0.8571 |
| HH | Octadecanoic?Acid,Stearic Acid | FFAR1  | 0.8571 |
| HH | Octadecanoic?Acid,Stearic Acid | FKBP1A | 1      |
| HH | Octadecanoic?Acid,Stearic Acid | FURIN  | 1      |
| HH | Octadecanoic?Acid,Stearic Acid | GLTP   | 1      |
| HH | Octadecanoic?Acid,Stearic Acid | GM2A   | 1      |
| HH | Octadecanoic?Acid,Stearic Acid | GUCA1A | 1      |
| HH | Octadecanoic?Acid,Stearic Acid | HAO1   | 0.8    |
| HH | Octadecanoic?Acid,Stearic Acid | HDAC2  | 0.8095 |
| HH | Octadecanoic?Acid,Stearic Acid | HDAC9  | 0.8095 |
| HH | Octadecanoic?Acid,Stearic Acid | HNF4A  | 1      |
| HH | Octadecanoic?Acid,Stearic Acid | HNF4G  | 1      |
| HH | Octadecanoic?Acid,Stearic Acid | INS    | 1      |
| HH | Octadecanoic?Acid,Stearic Acid | LALBA  | 1      |
| HH | Octadecanoic?Acid,Stearic Acid | LIP3   | 1      |
| HH | Octadecanoic?Acid,Stearic Acid | LTB4R  | 0.8    |
| HH | Octadecanoic?Acid,Stearic Acid | LTB4R2 | 0.8    |
| HH | Octadecanoic?Acid,Stearic Acid | LTF    | 1      |
| HH | Octadecanoic?Acid,Stearic Acid | LY96   | 1      |
| HH | Octadecanoic?Acid,Stearic Acid | NCOA1  | 1      |
| HH | Octadecanoic?Acid,Stearic Acid | NR1H4  | 0.9524 |
| HH | Octadecanoic?Acid,Stearic Acid | OGDH   | 0.8095 |
| HH | Octadecanoic?Acid,Stearic Acid | PAEP   | 1      |

|    |                                |             |        |
|----|--------------------------------|-------------|--------|
| HH | Octadecanoic?Acid,Stearic Acid | PKIA        | 1      |
| HH | Octadecanoic?Acid,Stearic Acid | PLA2G1B     | 1      |
| HH | Octadecanoic?Acid,Stearic Acid | PLA2G2A     | 1      |
| HH | Octadecanoic?Acid,Stearic Acid | PLA2G2D     | 1      |
| HH | Octadecanoic?Acid,Stearic Acid | PLA2G2E     | 1      |
| HH | Octadecanoic?Acid,Stearic Acid | PMP2        | 1      |
| HH | Octadecanoic?Acid,Stearic Acid | PPARA       | 1      |
| HH | Octadecanoic?Acid,Stearic Acid | PPARD       | 0.9524 |
| HH | Octadecanoic?Acid,Stearic Acid | PPARG       | 1      |
| HH | Octadecanoic?Acid,Stearic Acid | PPA_RS05235 | 0.9524 |
| HH | Octadecanoic?Acid,Stearic Acid | PPP3CA      | 1      |
| HH | Octadecanoic?Acid,Stearic Acid | PPP3R1      | 1      |
| HH | Octadecanoic?Acid,Stearic Acid | PPT1        | 1      |
| HH | Octadecanoic?Acid,Stearic Acid | PRKACA      | 1      |
| HH | Octadecanoic?Acid,Stearic Acid | PTGS1       | 0.9524 |
| HH | Octadecanoic?Acid,Stearic Acid | PTGS2       | 0.9524 |
| HH | Octadecanoic?Acid,Stearic Acid | PVR         | 1      |
| HH | Octadecanoic?Acid,Stearic Acid | RCVRN       | 1      |
| HH | Octadecanoic?Acid,Stearic Acid | RHO         | 1      |
| HH | Octadecanoic?Acid,Stearic Acid | RXRA        | 0.9524 |
| HH | Octadecanoic?Acid,Stearic Acid | RXRB        | 0.8095 |
| HH | Octadecanoic?Acid,Stearic Acid | RXRG        | 0.8095 |
| HH | Octadecanoic?Acid,Stearic Acid | S100B       | 0.8571 |
| HH | Octadecanoic?Acid,Stearic Acid | SCN10A      | 0.8095 |
| HH | Octadecanoic?Acid,Stearic Acid | SCN11A      | 0.8095 |
| HH | Octadecanoic?Acid,Stearic Acid | SCN1A       | 0.8095 |
| HH | Octadecanoic?Acid,Stearic Acid | SCN1B       | 0.8095 |

|    |                                |         |        |
|----|--------------------------------|---------|--------|
| HH | Octadecanoic?Acid,Stearic Acid | SCN2A   | 0.8095 |
| HH | Octadecanoic?Acid,Stearic Acid | SCN2B   | 0.8095 |
| HH | Octadecanoic?Acid,Stearic Acid | SCN3A   | 0.8095 |
| HH | Octadecanoic?Acid,Stearic Acid | SCN3B   | 0.8095 |
| HH | Octadecanoic?Acid,Stearic Acid | SCN4A   | 0.8095 |
| HH | Octadecanoic?Acid,Stearic Acid | SCN4B   | 0.8095 |
| HH | Octadecanoic?Acid,Stearic Acid | SCN5A   | 0.8095 |
| HH | Octadecanoic?Acid,Stearic Acid | SCN7A   | 0.8095 |
| HH | Octadecanoic?Acid,Stearic Acid | SCN8A   | 0.8095 |
| HH | Octadecanoic?Acid,Stearic Acid | SCN9A   | 0.8095 |
| HH | Octadecanoic?Acid,Stearic Acid | SEC14L2 | 1      |
| HH | Octadecanoic?Acid,Stearic Acid | SLC8A1  | 0.8571 |
| HH | Octadecanoic?Acid,Stearic Acid | SREBF1  | 0.8095 |
| HH | Octadecanoic?Acid,Stearic Acid | TLR4    | 1      |
| HH | Octadecanoic?Acid,Stearic Acid | TM1468  | 1      |
| HH | Octadecanoic?Acid,Stearic Acid | TRAPPC3 | 1      |
| HH | Octadecanoic?Acid,Stearic Acid | TRPV1   | 0.8571 |
| HH | Octadecanoic?Acid,Stearic Acid | VLDLR   | 1      |
| HH | Carthamidin                    | ACTB    | 0.9333 |
| HH | Carthamidin                    | AHR     | 0.9333 |
| HH | Carthamidin                    | AKR1C1  | 0.9    |
| HH | Carthamidin                    | AKT1    | 0.8667 |
| HH | Carthamidin                    | ATP5A1  | 0.9333 |
| HH | Carthamidin                    | ATP5B   | 0.9333 |
| HH | Carthamidin                    | ATP5C1  | 0.9333 |
| HH | Carthamidin                    | CBR1    | 0.9333 |
| HH | Carthamidin                    | CDK6    | 0.9    |
| HH | Carthamidin                    | CEBPB   | 0.9333 |
| HH | Carthamidin                    | COMT    | 0.871  |
| HH | Carthamidin                    | CSNK2A1 | 0.9333 |
| HH | Carthamidin                    | CSNK2B  | 0.9333 |
| HH | Carthamidin                    | CYP19A1 | 0.9    |
| HH | Carthamidin                    | CYP1B1  | 0.9333 |
| HH | Carthamidin                    | DHFRL1  | 0.8788 |
| HH | Carthamidin                    | DNMT1   | 0.8788 |
| HH | Carthamidin                    | EIF3F   | 0.9333 |
| HH | Carthamidin                    | ESR1    | 0.9333 |

|    |             |          |        |
|----|-------------|----------|--------|
| HH | Carthamidin | ESR2     | 0.9333 |
| HH | Carthamidin | ESRRA    | 0.8667 |
| HH | Carthamidin | ESRRB    | 0.8667 |
| HH | Carthamidin | GPB1     | 0.8667 |
| HH | Carthamidin | HCK      | 0.9333 |
| HH | Carthamidin | HIBCH    | 0.9333 |
| HH | Carthamidin | HSP90AA1 | 0.9333 |
| HH | Carthamidin | HSPA2    | 0.9333 |
| HH | Carthamidin | IGHG1    | 0.8065 |
| HH | Carthamidin | JAK1     | 0.9333 |
| HH | Carthamidin | KANSL3   | 0.9    |
| HH | Carthamidin | MTTP     | 0.8788 |
| HH | Carthamidin | NCOA1    | 0.8667 |
| HH | Carthamidin | NCOA2    | 0.8667 |
| HH | Carthamidin | NQO2     | 0.9333 |
| HH | Carthamidin | NR1I2    | 0.9333 |
| HH | Carthamidin | PIK3CG   | 0.9333 |
| HH | Carthamidin | PIM1     | 0.9333 |
| HH | Carthamidin | PTK2B    | 0.8667 |
| HH | Carthamidin | RUVBL2   | 0.9333 |
| HH | Carthamidin | SF3B3    | 0.9333 |
| HH | Carthamidin | SHBG     | 0.9333 |
| HH | Carthamidin | SOAT1    | 0.8788 |
| HH | Carthamidin | SOAT2    | 0.8788 |
| HH | Carthamidin | STK17B   | 0.9333 |
| HH | Carthamidin | TOP2A    | 0.8667 |
| HH | Carthamidin | UBA1     | 0.9333 |
| HH | Carthamidin | UGT3A1   | 0.9333 |
| HH | Carthamin   | ALDH2    | 0.8049 |
| HH | Carthamin   | AR       | 0.825  |
| HH | Carthamin   | LCT      | 0.8056 |
| HH | Carthamin   | TYR      | 0.8889 |
| HH | Carthamone  | AR       | 0.8049 |
| HH | Clerosterol | AKR1C1   | 0.8158 |
| HH | Clerosterol | AKR1C2   | 0.8158 |
| HH | Clerosterol | AR       | 0.8421 |
| HH | Clerosterol | CLEC4E   | 0.9167 |
| HH | Clerosterol | ESR1     | 0.8889 |
| HH | Clerosterol | ESR2     | 0.8378 |
| HH | Clerosterol | GABRA1   | 0.8378 |
| HH | Clerosterol | GABRA2   | 0.8378 |
| HH | Clerosterol | GABRA3   | 0.8378 |
| HH | Clerosterol | GABRA4   | 0.8378 |
| HH | Clerosterol | GABRA5   | 0.8378 |
| HH | Clerosterol | GABRA6   | 0.8378 |
| HH | Clerosterol | GABRB1   | 0.8378 |
| HH | Clerosterol | GABRB2   | 0.8378 |
| HH | Clerosterol | GABRB3   | 0.8378 |
| HH | Clerosterol | GABRD    | 0.8378 |
| HH | Clerosterol | GABRE    | 0.8378 |
| HH | Clerosterol | GABRG1   | 0.8378 |
| HH | Clerosterol | GABRG2   | 0.8378 |
| HH | Clerosterol | GABRG3   | 0.8378 |
| HH | Clerosterol | GABRP    | 0.8378 |
| HH | Clerosterol | GABRQ    | 0.8378 |

|    |                                                              |         |        |
|----|--------------------------------------------------------------|---------|--------|
| HH | Clerosterol                                                  | GRIN1   | 0.8378 |
| HH | Clerosterol                                                  | GRIN2A  | 0.8378 |
| HH | Clerosterol                                                  | GRIN2B  | 0.8378 |
| HH | Clerosterol                                                  | GRIN2C  | 0.8378 |
| HH | Clerosterol                                                  | GRIN2D  | 0.8378 |
| HH | Clerosterol                                                  | GRIN3A  | 0.8378 |
| HH | Clerosterol                                                  | GRIN3B  | 0.8378 |
| HH | Clerosterol                                                  | HSD17B1 | 0.8378 |
| HH | Clerosterol                                                  | LSS     | 0.8919 |
| HH | Clerosterol                                                  | MED1    | 0.825  |
| HH | Clerosterol                                                  | NCOA2   | 0.8158 |
| HH | Clerosterol                                                  | NR1I2   | 0.8649 |
| HH | Clerosterol                                                  | NR1I3   | 0.9167 |
| HH | Clerosterol                                                  | NR3C1   | 0.825  |
| HH | Clerosterol                                                  | NR3C2   | 0.8158 |
| HH | Clerosterol                                                  | PGR     | 0.8889 |
| HH | Clerosterol                                                  | PPARA   | 0.8378 |
| HH | Clerosterol                                                  | RORA    | 0.9167 |
| HH | Clerosterol                                                  | SIGMAR1 | 0.8378 |
| HH | Clerosterol                                                  | SULT2A1 | 0.8378 |
| HH | Clerosterol                                                  | SULT2B1 | 0.8649 |
| HH | Clerosterol                                                  | VDR     | 0.9167 |
| HH | Dehydrosafynol                                               | F13A1   | 0.8333 |
| HH | Dehydrosafynol                                               | LYZ     | 0.8333 |
| HH | 15 $\beta$ ,20 $\beta$ -Dihydroxy- $\Delta^4$ -Pregnen-3-One | ADH1C   | 0.825  |
| HH | 15 $\beta$ ,20 $\beta$ -Dihydroxy- $\Delta^4$ -Pregnen-3-One | AKR1C1  | 0.9189 |
| HH | 15 $\beta$ ,20 $\beta$ -Dihydroxy- $\Delta^4$ -Pregnen-3-One | AKR1C2  | 0.9189 |
| HH | 15 $\beta$ ,20 $\beta$ -Dihydroxy- $\Delta^4$ -Pregnen-3-One | AKR1D1  | 0.8108 |
| HH | 15 $\beta$ ,20 $\beta$ -Dihydroxy- $\Delta^4$ -Pregnen-3-One | ANXA1   | 0.8043 |
| HH | 15 $\beta$ ,20 $\beta$ -Dihydroxy- $\Delta^4$ -Pregnen-3-One | AR      | 0.9474 |
| HH | 15 $\beta$ ,20 $\beta$ -Dihydroxy- $\Delta^4$ -Pregnen-3-One | CES1    | 0.825  |
| HH | 15 $\beta$ ,20 $\beta$ -Dihydroxy- $\Delta^4$ -Pregnen-3-One | CLEC4E  | 0.8205 |
| HH | 15 $\beta$ ,20 $\beta$ -Dihydroxy- $\Delta^4$ -Pregnen-3-One | COX4I1  | 0.825  |
| HH | 15 $\beta$ ,20 $\beta$ -Dihydroxy- $\Delta^4$ -Pregnen-3-One | COX5A   | 0.825  |
| HH | 15 $\beta$ ,20 $\beta$ -Dihydroxy- $\Delta^4$ -Pregnen-3-One | COX5B   | 0.825  |
| HH | 15 $\beta$ ,20 $\beta$ -Dihydroxy- $\Delta^4$ -Pregnen-3-One | COX6A2  | 0.825  |
| HH | 15 $\beta$ ,20 $\beta$ -Dihydroxy- $\Delta^4$ -Pregnen-3-One | COX6B1  | 0.825  |
| HH | 15 $\beta$ ,20 $\beta$ -Dihydroxy- $\Delta^4$ -Pregnen-3-One | COX6C   | 0.825  |
| HH | 15 $\beta$ ,20 $\beta$ -Dihydroxy- $\Delta^4$ -Pregnen-3-One | COX7A1  | 0.825  |

|    |                                                               |        |        |
|----|---------------------------------------------------------------|--------|--------|
| HH | 15 $\beta$ ,20 $\alpha$ -Dihydroxy- $\Delta^4$ -Pregnen-3-One | COX7B  | 0.825  |
| HH | 15 $\beta$ ,20 $\alpha$ -Dihydroxy- $\Delta^4$ -Pregnen-3-One | COX7C  | 0.825  |
| HH | 15 $\beta$ ,20 $\alpha$ -Dihydroxy- $\Delta^4$ -Pregnen-3-One | COX8A  | 0.825  |
| HH | 15 $\beta$ ,20 $\alpha$ -Dihydroxy- $\Delta^4$ -Pregnen-3-One | EFTUD1 | 0.825  |
| HH | 15 $\beta$ ,20 $\alpha$ -Dihydroxy- $\Delta^4$ -Pregnen-3-One | ESR1   | 0.9459 |
| HH | 15 $\beta$ ,20 $\alpha$ -Dihydroxy- $\Delta^4$ -Pregnen-3-One | ESR2   | 0.8919 |
| HH | 15 $\beta$ ,20 $\alpha$ -Dihydroxy- $\Delta^4$ -Pregnen-3-One | ESRRG  | 0.825  |
| HH | 15 $\beta$ ,20 $\alpha$ -Dihydroxy- $\Delta^4$ -Pregnen-3-One | FABP6  | 0.825  |
| HH | 15 $\beta$ ,20 $\alpha$ -Dihydroxy- $\Delta^4$ -Pregnen-3-One | FECH   | 0.825  |
| HH | 15 $\beta$ ,20 $\alpha$ -Dihydroxy- $\Delta^4$ -Pregnen-3-One | GABRA1 | 0.8919 |
| HH | 15 $\beta$ ,20 $\alpha$ -Dihydroxy- $\Delta^4$ -Pregnen-3-One | GABRA2 | 0.8919 |
| HH | 15 $\beta$ ,20 $\alpha$ -Dihydroxy- $\Delta^4$ -Pregnen-3-One | GABRA3 | 0.8919 |
| HH | 15 $\beta$ ,20 $\alpha$ -Dihydroxy- $\Delta^4$ -Pregnen-3-One | GABRA4 | 0.8919 |
| HH | 15 $\beta$ ,20 $\alpha$ -Dihydroxy- $\Delta^4$ -Pregnen-3-One | GABRA5 | 0.8919 |
| HH | 15 $\beta$ ,20 $\alpha$ -Dihydroxy- $\Delta^4$ -Pregnen-3-One | GABRA6 | 0.8919 |
| HH | 15 $\beta$ ,20 $\alpha$ -Dihydroxy- $\Delta^4$ -Pregnen-3-One | GABRB1 | 0.8919 |
| HH | 15 $\beta$ ,20 $\alpha$ -Dihydroxy- $\Delta^4$ -Pregnen-3-One | GABRB2 | 0.8919 |
| HH | 15 $\beta$ ,20 $\alpha$ -Dihydroxy- $\Delta^4$ -Pregnen-3-One | GABRB3 | 0.8919 |
| HH | 15 $\beta$ ,20 $\alpha$ -Dihydroxy- $\Delta^4$ -Pregnen-3-One | GABRD  | 0.8919 |
| HH | 15 $\beta$ ,20 $\alpha$ -Dihydroxy- $\Delta^4$ -Pregnen-3-One | GABRE  | 0.8919 |
| HH | 15 $\beta$ ,20 $\alpha$ -Dihydroxy- $\Delta^4$ -Pregnen-3-One | GABRG1 | 0.8919 |
| HH | 15 $\beta$ ,20 $\alpha$ -Dihydroxy- $\Delta^4$ -Pregnen-3-One | GABRG2 | 0.8919 |
| HH | 15 $\beta$ ,20 $\alpha$ -Dihydroxy- $\Delta^4$ -Pregnen-3-One | GABRG3 | 0.8919 |
| HH | 15 $\beta$ ,20 $\alpha$ -Dihydroxy- $\Delta^4$ -Pregnen-3-One | GABRP  | 0.8919 |
| HH | 15 $\beta$ ,20 $\alpha$ -Dihydroxy- $\Delta^4$ -Pregnen-3-One | GABRQ  | 0.8919 |
| HH | 15 $\beta$ ,20 $\alpha$ -Dihydroxy- $\Delta^4$ -Pregnen-3-One | GPBAR1 | 0.825  |
| HH | 15 $\beta$ ,20 $\alpha$ -Dihydroxy- $\Delta^4$ -Pregnen-3-One | GRIN1  | 0.8919 |



|    |                                                               |          |        |
|----|---------------------------------------------------------------|----------|--------|
| HH | 15 $\beta$ ,20 $\alpha$ -Dihydroxy- $\Delta^4$ -Pregnen-3-One | GRIN2A   | 0.8919 |
| HH | 15 $\beta$ ,20 $\alpha$ -Dihydroxy- $\Delta^4$ -Pregnen-3-One | GRIN2B   | 0.8919 |
| HH | 15 $\beta$ ,20 $\alpha$ -Dihydroxy- $\Delta^4$ -Pregnen-3-One | GRIN2C   | 0.8919 |
| HH | 15 $\beta$ ,20 $\alpha$ -Dihydroxy- $\Delta^4$ -Pregnen-3-One | GRIN2D   | 0.8919 |
| HH | 15 $\beta$ ,20 $\alpha$ -Dihydroxy- $\Delta^4$ -Pregnen-3-One | GRIN3A   | 0.8919 |
| HH | 15 $\beta$ ,20 $\alpha$ -Dihydroxy- $\Delta^4$ -Pregnen-3-One | GRIN3B   | 0.8919 |
| HH | 15 $\beta$ ,20 $\alpha$ -Dihydroxy- $\Delta^4$ -Pregnen-3-One | GSTP1    | 0.825  |
| HH | 15 $\beta$ ,20 $\alpha$ -Dihydroxy- $\Delta^4$ -Pregnen-3-One | HDAC2    | 0.8    |
| HH | 15 $\beta$ ,20 $\alpha$ -Dihydroxy- $\Delta^4$ -Pregnen-3-One | HOXA10   | 0.8333 |
| HH | 15 $\beta$ ,20 $\alpha$ -Dihydroxy- $\Delta^4$ -Pregnen-3-One | HSD11B1  | 0.8372 |
| HH | 15 $\beta$ ,20 $\alpha$ -Dihydroxy- $\Delta^4$ -Pregnen-3-One | HSD11B2  | 0.925  |
| HH | 15 $\beta$ ,20 $\alpha$ -Dihydroxy- $\Delta^4$ -Pregnen-3-One | HSD17B1  | 0.8919 |
| HH | 15 $\beta$ ,20 $\alpha$ -Dihydroxy- $\Delta^4$ -Pregnen-3-One | HSD17B11 | 0.8108 |
| HH | 15 $\beta$ ,20 $\alpha$ -Dihydroxy- $\Delta^4$ -Pregnen-3-One | HSD3B1   | 0.8043 |
| HH | 15 $\beta$ ,20 $\alpha$ -Dihydroxy- $\Delta^4$ -Pregnen-3-One | IGHG2    | 0.8333 |
| HH | 15 $\beta$ ,20 $\alpha$ -Dihydroxy- $\Delta^4$ -Pregnen-3-One | LSS      | 0.8462 |
| HH | 15 $\beta$ ,20 $\alpha$ -Dihydroxy- $\Delta^4$ -Pregnen-3-One | MT-CO1   | 0.825  |
| HH | 15 $\beta$ ,20 $\alpha$ -Dihydroxy- $\Delta^4$ -Pregnen-3-One | MT-CO2   | 0.825  |
| HH | 15 $\beta$ ,20 $\alpha$ -Dihydroxy- $\Delta^4$ -Pregnen-3-One | MT-CO3   | 0.825  |
| HH | 15 $\beta$ ,20 $\alpha$ -Dihydroxy- $\Delta^4$ -Pregnen-3-One | NCOA1    | 0.8095 |
| HH | 15 $\beta$ ,20 $\alpha$ -Dihydroxy- $\Delta^4$ -Pregnen-3-One | NCOA2    | 0.9189 |
| HH | 15 $\beta$ ,20 $\alpha$ -Dihydroxy- $\Delta^4$ -Pregnen-3-One | NFKB1    | 0.9211 |
| HH | 15 $\beta$ ,20 $\alpha$ -Dihydroxy- $\Delta^4$ -Pregnen-3-One | NFKB2    | 0.9211 |
| HH | 15 $\beta$ ,20 $\alpha$ -Dihydroxy- $\Delta^4$ -Pregnen-3-One | NPPB     | 0.9474 |
| HH | 15 $\beta$ ,20 $\alpha$ -Dihydroxy- $\Delta^4$ -Pregnen-3-One | NR1H4    | 0.825  |
| HH | 15 $\beta$ ,20 $\alpha$ -Dihydroxy- $\Delta^4$ -Pregnen-3-One | NR1I2    | 0.9189 |
| HH | 15 $\beta$ ,20 $\alpha$ -Dihydroxy- $\Delta^4$ -Pregnen-3-One | NR1I3    | 0.8919 |

|    |                                                              |         |        |
|----|--------------------------------------------------------------|---------|--------|
| HH | 15 $\beta$ ,20 $\beta$ -Dihydroxy- $\Delta^4$ -Pregnen-3-One | NR3C1   | 0.9211 |
| HH | 15 $\beta$ ,20 $\beta$ -Dihydroxy- $\Delta^4$ -Pregnen-3-One | NR3C2   | 0.9189 |
| HH | 15 $\beta$ ,20 $\beta$ -Dihydroxy- $\Delta^4$ -Pregnen-3-One | PGR     | 0.9189 |
| HH | 15 $\beta$ ,20 $\beta$ -Dihydroxy- $\Delta^4$ -Pregnen-3-One | PLA2G1B | 0.825  |
| HH | 15 $\beta$ ,20 $\beta$ -Dihydroxy- $\Delta^4$ -Pregnen-3-One | PPARA   | 0.8919 |
| HH | 15 $\beta$ ,20 $\beta$ -Dihydroxy- $\Delta^4$ -Pregnen-3-One | PRLR    | 0.9024 |
| HH | 15 $\beta$ ,20 $\beta$ -Dihydroxy- $\Delta^4$ -Pregnen-3-One | RORA    | 0.8205 |
| HH | 15 $\beta$ ,20 $\beta$ -Dihydroxy- $\Delta^4$ -Pregnen-3-One | SHBG    | 0.8684 |
| HH | 15 $\beta$ ,20 $\beta$ -Dihydroxy- $\Delta^4$ -Pregnen-3-One | SIGMAR1 | 0.8919 |
| HH | 15 $\beta$ ,20 $\beta$ -Dihydroxy- $\Delta^4$ -Pregnen-3-One | SRD5A1  | 0.8    |
| HH | 15 $\beta$ ,20 $\beta$ -Dihydroxy- $\Delta^4$ -Pregnen-3-One | SULT2A1 | 0.8919 |
| HH | 15 $\beta$ ,20 $\beta$ -Dihydroxy- $\Delta^4$ -Pregnen-3-One | SULT2B1 | 0.9189 |
| HH | 15 $\beta$ ,20 $\beta$ -Dihydroxy- $\Delta^4$ -Pregnen-3-One | VDR     | 0.85   |
| HH | 6-Hydroxykaempferol-7-O-Glucoside                            | AHR     | 0.9024 |
| HH | 6-Hydroxykaempferol-7-O-Glucoside                            | AKR1C3  | 0.9487 |
| HH | 6-Hydroxykaempferol-7-O-Glucoside                            | ALDH2   | 1      |
| HH | 6-Hydroxykaempferol-7-O-Glucoside                            | AR      | 0.9737 |
| HH | 6-Hydroxykaempferol-7-O-Glucoside                            | AURKB   | 0.9024 |
| HH | 6-Hydroxykaempferol-7-O-Glucoside                            | CBR1    | 0.9487 |
| HH | 6-Hydroxykaempferol-7-O-Glucoside                            | DHFRL1  | 0.8421 |
| HH | 6-Hydroxykaempferol-7-O-Glucoside                            | DNMT1   | 0.8421 |
| HH | 6-Hydroxykaempferol-7-O-Glucoside                            | TYR     | 0.8421 |
| HH | Neocarthamin                                                 | AHR     | 0.9024 |
| HH | Neocarthamin                                                 | AKR1C3  | 0.9487 |
| HH | Neocarthamin                                                 | ALDH2   | 1      |
| HH | Neocarthamin                                                 | AR      | 0.9737 |
| HH | Neocarthamin                                                 | AURKB   | 0.9024 |
| HH | Neocarthamin                                                 | CBR1    | 0.9487 |
| HH | Neocarthamin                                                 | DHFRL1  | 0.8421 |
| HH | Neocarthamin                                                 | DNMT1   | 0.8421 |
| HH | Neocarthamin                                                 | TYR     | 0.8421 |
| HH | Nonacosanediol-6,8                                           | ACOX1   | 0.8462 |
| HH | Nonacosanediol-6,8                                           | LY96    | 0.8462 |

|    |                    |          |        |
|----|--------------------|----------|--------|
| HH | Nonacosanediol-6,8 | TLR4     | 0.8462 |
| HH | Onjixanthone I     | GABRA1   | 0.875  |
| HH | Onjixanthone I     | GABRA2   | 0.875  |
| HH | Onjixanthone I     | GABRA3   | 0.875  |
| HH | Onjixanthone I     | GABRA4   | 0.875  |
| HH | Onjixanthone I     | GABRA5   | 0.875  |
| HH | Onjixanthone I     | GABRA6   | 0.875  |
| HH | Onjixanthone I     | GABRG1   | 0.875  |
| HH | Onjixanthone I     | GABRG2   | 0.875  |
| HH | Onjixanthone I     | GABRG3   | 0.875  |
| HH | Onjixanthone Ii    | ACTB     | 0.8125 |
| HH | Onjixanthone Ii    | AHR      | 0.8125 |
| HH | Onjixanthone Ii    | AKT1     | 0.8065 |
| HH | Onjixanthone Ii    | ATP5A1   | 0.8125 |
| HH | Onjixanthone Ii    | ATP5B    | 0.8125 |
| HH | Onjixanthone Ii    | ATP5C1   | 0.8125 |
| HH | Onjixanthone Ii    | CBR1     | 0.8125 |
| HH | Onjixanthone Ii    | CEBPB    | 0.8125 |
| HH | Onjixanthone Ii    | CSNK2A1  | 0.8125 |
| HH | Onjixanthone Ii    | CSNK2B   | 0.8125 |
| HH | Onjixanthone Ii    | CYP1B1   | 0.8125 |
| HH | Onjixanthone Ii    | EIF3F    | 0.8125 |
| HH | Onjixanthone Ii    | ESR1     | 0.8125 |
| HH | Onjixanthone Ii    | ESR2     | 0.8125 |
| HH | Onjixanthone Ii    | ESRRA    | 0.8065 |
| HH | Onjixanthone Ii    | ESRRB    | 0.8065 |
| HH | Onjixanthone Ii    | GABRA1   | 0.9677 |
| HH | Onjixanthone Ii    | GABRA2   | 0.9677 |
| HH | Onjixanthone Ii    | GABRA3   | 0.9677 |
| HH | Onjixanthone Ii    | GABRA4   | 0.9677 |
| HH | Onjixanthone Ii    | GABRA5   | 0.9677 |
| HH | Onjixanthone Ii    | GABRA6   | 0.9677 |
| HH | Onjixanthone Ii    | GABRG1   | 0.9677 |
| HH | Onjixanthone Ii    | GABRG2   | 0.9677 |
| HH | Onjixanthone Ii    | GABRG3   | 0.9677 |
| HH | Onjixanthone Ii    | GPER1    | 0.8065 |
| HH | Onjixanthone Ii    | HCK      | 0.8125 |
| HH | Onjixanthone Ii    | HIBCH    | 0.8125 |
| HH | Onjixanthone Ii    | HSP90AA1 | 0.8125 |
| HH | Onjixanthone Ii    | HSPA2    | 0.8125 |
| HH | Onjixanthone Ii    | JAK1     | 0.8125 |
| HH | Onjixanthone Ii    | MTTP     | 0.8788 |
| HH | Onjixanthone Ii    | NCOA1    | 0.8065 |
| HH | Onjixanthone Ii    | NCOA2    | 0.8065 |
| HH | Onjixanthone Ii    | NQO2     | 0.8125 |
| HH | Onjixanthone Ii    | NR1I2    | 0.8125 |
| HH | Onjixanthone Ii    | PIK3CG   | 0.8125 |
| HH | Onjixanthone Ii    | PIM1     | 0.8125 |
| HH | Onjixanthone Ii    | PTK2B    | 0.8065 |
| HH | Onjixanthone Ii    | RUVBL2   | 0.8125 |
| HH | Onjixanthone Ii    | SF3B3    | 0.8125 |
| HH | Onjixanthone Ii    | SHBG     | 0.8788 |
| HH | Onjixanthone Ii    | SOAT1    | 0.8788 |
| HH | Onjixanthone Ii    | SOAT2    | 0.8788 |
| HH | Onjixanthone Ii    | STK17B   | 0.8125 |

|    |                                                                 |              |        |
|----|-----------------------------------------------------------------|--------------|--------|
| HH | Onjixanthone Ii                                                 | TOP2A        | 0.8065 |
| HH | Onjixanthone Ii                                                 | UBA1         | 0.8125 |
| HH | Onjixanthone Ii                                                 | UGT3A1       | 0.8387 |
| HH | Propanetriol-Î'-L-Arabinofuranosyl (1â†'4)-Î'-D-Glucopyranoside | ABO          | 0.8378 |
| HH | Propanetriol-Î'-L-Arabinofuranosyl (1â†'4)-Î'-D-Glucopyranoside | ACTA1        | 0.9167 |
| HH | Propanetriol-Î'-L-Arabinofuranosyl (1â†'4)-Î'-D-Glucopyranoside | AMY1A        | 0.8235 |
| HH | Propanetriol-Î'-L-Arabinofuranosyl (1â†'4)-Î'-D-Glucopyranoside | AMY2A        | 0.8235 |
| HH | Propanetriol-Î'-L-Arabinofuranosyl (1â†'4)-Î'-D-Glucopyranoside | AMY2B        | 0.8857 |
| HH | Propanetriol-Î'-L-Arabinofuranosyl (1â†'4)-Î'-D-Glucopyranoside | ATOX1        | 0.9167 |
| HH | Propanetriol-Î'-L-Arabinofuranosyl (1â†'4)-Î'-D-Glucopyranoside | BAMF_RS28815 | 0.8235 |
| HH | Propanetriol-Î'-L-Arabinofuranosyl (1â†'4)-Î'-D-Glucopyranoside | FHIT         | 0.8333 |
| HH | Propanetriol-Î'-L-Arabinofuranosyl (1â†'4)-Î'-D-Glucopyranoside | FTL          | 0.8095 |
| HH | Propanetriol-Î'-L-Arabinofuranosyl (1â†'4)-Î'-D-Glucopyranoside | GCK          | 0.8235 |
| HH | Propanetriol-Î'-L-Arabinofuranosyl (1â†'4)-Î'-D-Glucopyranoside | GLT6D1       | 0.8857 |
| HH | Propanetriol-Î'-L-Arabinofuranosyl (1â†'4)-Î'-D-Glucopyranoside | GLTP         | 0.8857 |
| HH | Propanetriol-Î'-L-Arabinofuranosyl (1â†'4)-Î'-D-Glucopyranoside | GNPDA1       | 0.8235 |
| HH | Propanetriol-Î'-L-Arabinofuranosyl (1â†'4)-Î'-D-Glucopyranoside | HBA1         | 0.825  |
| HH | Propanetriol-Î'-L-Arabinofuranosyl (1â†'4)-Î'-D-Glucopyranoside | HBB          | 0.8095 |
| HH | Propanetriol-Î'-L-Arabinofuranosyl (1â†'4)-Î'-D-Glucopyranoside | HK1          | 0.8235 |
| HH | Propanetriol-Î'-L-Arabinofuranosyl (1â†'4)-Î'-D-Glucopyranoside | IFNB1        | 0.8235 |

|    |                                                                                           |          |        |
|----|-------------------------------------------------------------------------------------------|----------|--------|
| HH | Propanetriol- $\beta$ -L-Arabinofuranosyl (1 $\rightarrow$ 4)- $\beta$ -D-Glucopyranoside | KRTAP5-2 | 0.8235 |
| HH | Propanetriol- $\beta$ -L-Arabinofuranosyl (1 $\rightarrow$ 4)- $\beta$ -D-Glucopyranoside | KRTAP5-3 | 0.8235 |
| HH | Propanetriol- $\beta$ -L-Arabinofuranosyl (1 $\rightarrow$ 4)- $\beta$ -D-Glucopyranoside | LCT      | 0.8    |
| HH | Propanetriol- $\beta$ -L-Arabinofuranosyl (1 $\rightarrow$ 4)- $\beta$ -D-Glucopyranoside | LCTL     | 0.8235 |
| HH | Propanetriol- $\beta$ -L-Arabinofuranosyl (1 $\rightarrow$ 4)- $\beta$ -D-Glucopyranoside | LGALS2   | 0.8235 |
| HH | Propanetriol- $\beta$ -L-Arabinofuranosyl (1 $\rightarrow$ 4)- $\beta$ -D-Glucopyranoside | LGALS3   | 0.8857 |
| HH | Propanetriol- $\beta$ -L-Arabinofuranosyl (1 $\rightarrow$ 4)- $\beta$ -D-Glucopyranoside | LGALS7   | 0.8235 |
| HH | Propanetriol- $\beta$ -L-Arabinofuranosyl (1 $\rightarrow$ 4)- $\beta$ -D-Glucopyranoside | LYZ      | 0.9167 |
| HH | Propanetriol- $\beta$ -L-Arabinofuranosyl (1 $\rightarrow$ 4)- $\beta$ -D-Glucopyranoside | MB       | 0.8235 |
| HH | Propanetriol- $\beta$ -L-Arabinofuranosyl (1 $\rightarrow$ 4)- $\beta$ -D-Glucopyranoside | MBL2     | 0.8056 |
| HH | Propanetriol- $\beta$ -L-Arabinofuranosyl (1 $\rightarrow$ 4)- $\beta$ -D-Glucopyranoside | NCAN     | 0.8235 |
| HH | Propanetriol- $\beta$ -L-Arabinofuranosyl (1 $\rightarrow$ 4)- $\beta$ -D-Glucopyranoside | NUDT9    | 0.8235 |
| HH | Propanetriol- $\beta$ -L-Arabinofuranosyl (1 $\rightarrow$ 4)- $\beta$ -D-Glucopyranoside | PTGS1    | 0.8235 |
| HH | Propanetriol- $\beta$ -L-Arabinofuranosyl (1 $\rightarrow$ 4)- $\beta$ -D-Glucopyranoside | PYGL     | 0.8235 |
| HH | Propanetriol- $\beta$ -L-Arabinofuranosyl (1 $\rightarrow$ 4)- $\beta$ -D-Glucopyranoside | PYGM     | 0.8235 |
| HH | Propanetriol- $\beta$ -L-Arabinofuranosyl (1 $\rightarrow$ 4)- $\beta$ -D-Glucopyranoside | RTCB     | 0.9167 |
| HH | Propanetriol- $\beta$ -L-Arabinofuranosyl (1 $\rightarrow$ 4)- $\beta$ -D-Glucopyranoside | SFTPD    | 0.8235 |
| HH | Propanetriol- $\beta$ -L-Arabinofuranosyl (1 $\rightarrow$ 4)- $\beta$ -D-Glucopyranoside | SIGLEC1  | 0.8235 |

|    |                                                                                           |         |        |
|----|-------------------------------------------------------------------------------------------|---------|--------|
| HH | Propanetriol- $\beta$ -L-Arabinofuranosyl (1 $\rightarrow$ 4)- $\beta$ -D-Glucopyranoside | SMARCA5 | 0.8529 |
| HH | Propanetriol- $\beta$ -L-Arabinofuranosyl (1 $\rightarrow$ 4)- $\beta$ -D-Glucopyranoside | TAS1R2  | 0.9167 |
| HH | Propanetriol- $\beta$ -L-Arabinofuranosyl (1 $\rightarrow$ 4)- $\beta$ -D-Glucopyranoside | TM0024  | 0.8235 |
| HH | 1-Ribityl-2,3-Diketo-1,2,3,4-Tetrahydro-6,7-Dimethyl-Quinoxaline                          | ADORA1  | 0.803  |
| HH | 1-Ribityl-2,3-Diketo-1,2,3,4-Tetrahydro-6,7-Dimethyl-Quinoxaline                          | ADORA2A | 0.803  |
| HH | 1-Ribityl-2,3-Diketo-1,2,3,4-Tetrahydro-6,7-Dimethyl-Quinoxaline                          | BLVRB   | 0.9206 |
| HH | 1-Ribityl-2,3-Diketo-1,2,3,4-Tetrahydro-6,7-Dimethyl-Quinoxaline                          | PDE4A   | 0.803  |
| HH | 1-Ribityl-2,3-Diketo-1,2,3,4-Tetrahydro-6,7-Dimethyl-Quinoxaline                          | PDE4B   | 0.803  |
| HH | 1-Ribityl-2,3-Diketo-1,2,3,4-Tetrahydro-6,7-Dimethyl-Quinoxaline                          | PDE4C   | 0.803  |
| HH | 1-Ribityl-2,3-Diketo-1,2,3,4-Tetrahydro-6,7-Dimethyl-Quinoxaline                          | PDE4D   | 0.803  |
| HH | 1-Ribityl-2,3-Diketo-1,2,3,4-Tetrahydro-6,7-Dimethyl-Quinoxaline                          | PDE7A   | 0.803  |
| HH | 1-Ribityl-2,3-Diketo-1,2,3,4-Tetrahydro-6,7-Dimethyl-Quinoxaline                          | PDE7B   | 0.803  |
| HH | 1-Ribityl-2,3-Diketo-1,2,3,4-Tetrahydro-6,7-Dimethyl-Quinoxaline                          | RFK     | 0.9206 |
| HH | Safynol                                                                                   | F13A1   | 0.8333 |
| HH | Safynol                                                                                   | LYZ     | 0.8333 |
| HQ | Sitosterol, $\beta$ -Sitosterol                                                           | AKR1C1  | 0.8158 |
| HQ | Sitosterol, $\beta$ -Sitosterol                                                           | AKR1C2  | 0.8158 |
| HQ | Sitosterol, $\beta$ -Sitosterol                                                           | AR      | 0.8421 |
| HQ | Sitosterol, $\beta$ -Sitosterol                                                           | CLEC4E  | 0.9714 |
| HQ | Sitosterol, $\beta$ -Sitosterol                                                           | ESR1    | 0.8421 |
| HQ | Sitosterol, $\beta$ -Sitosterol                                                           | ESR2    | 0.8378 |
| HQ | Sitosterol, $\beta$ -Sitosterol                                                           | GABRA1  | 0.8378 |
| HQ | Sitosterol, $\beta$ -Sitosterol                                                           | GABRA2  | 0.8378 |
| HQ | Sitosterol, $\beta$ -Sitosterol                                                           | GABRA3  | 0.8378 |
| HQ | Sitosterol, $\beta$ -Sitosterol                                                           | GABRA4  | 0.8378 |
| HQ | Sitosterol, $\beta$ -Sitosterol                                                           | GABRA5  | 0.8378 |
| HQ | Sitosterol, $\beta$ -Sitosterol                                                           | GABRA6  | 0.8378 |
| HQ | Sitosterol, $\beta$ -Sitosterol                                                           | GABRB1  | 0.8378 |
| HQ | Sitosterol, $\beta$ -Sitosterol                                                           | GABRB2  | 0.8378 |

|    |                                           |         |        |
|----|-------------------------------------------|---------|--------|
| HQ | Sitosterol, $\hat{I}^{\circ}$ -Sitosterol | GABRB3  | 0.8378 |
| HQ | Sitosterol, $\hat{I}^{\circ}$ -Sitosterol | GABRD   | 0.8378 |
| HQ | Sitosterol, $\hat{I}^{\circ}$ -Sitosterol | GABRE   | 0.8378 |
| HQ | Sitosterol, $\hat{I}^{\circ}$ -Sitosterol | GABRG1  | 0.8378 |
| HQ | Sitosterol, $\hat{I}^{\circ}$ -Sitosterol | GABRG2  | 0.8378 |
| HQ | Sitosterol, $\hat{I}^{\circ}$ -Sitosterol | GABRG3  | 0.8378 |
| HQ | Sitosterol, $\hat{I}^{\circ}$ -Sitosterol | GABRP   | 0.8378 |
| HQ | Sitosterol, $\hat{I}^{\circ}$ -Sitosterol | GABRQ   | 0.8378 |
| HQ | Sitosterol, $\hat{I}^{\circ}$ -Sitosterol | GRIN1   | 0.8378 |
| HQ | Sitosterol, $\hat{I}^{\circ}$ -Sitosterol | GRIN2A  | 0.8378 |
| HQ | Sitosterol, $\hat{I}^{\circ}$ -Sitosterol | GRIN2B  | 0.8378 |
| HQ | Sitosterol, $\hat{I}^{\circ}$ -Sitosterol | GRIN2C  | 0.8378 |
| HQ | Sitosterol, $\hat{I}^{\circ}$ -Sitosterol | GRIN2D  | 0.8378 |
| HQ | Sitosterol, $\hat{I}^{\circ}$ -Sitosterol | GRIN3A  | 0.8378 |
| HQ | Sitosterol, $\hat{I}^{\circ}$ -Sitosterol | GRIN3B  | 0.8378 |
| HQ | Sitosterol, $\hat{I}^{\circ}$ -Sitosterol | HSD17B1 | 0.8378 |
| HQ | Sitosterol, $\hat{I}^{\circ}$ -Sitosterol | LIP3    | 0.8205 |
| HQ | Sitosterol, $\hat{I}^{\circ}$ -Sitosterol | LSS     | 0.9444 |
| HQ | Sitosterol, $\hat{I}^{\circ}$ -Sitosterol | NCOA2   | 0.8158 |
| HQ | Sitosterol, $\hat{I}^{\circ}$ -Sitosterol | NR1I2   | 0.8649 |
| HQ | Sitosterol, $\hat{I}^{\circ}$ -Sitosterol | NR1I3   | 0.9714 |
| HQ | Sitosterol, $\hat{I}^{\circ}$ -Sitosterol | NR3C1   | 0.825  |
| HQ | Sitosterol, $\hat{I}^{\circ}$ -Sitosterol | NR3C2   | 0.8158 |
| HQ | Sitosterol, $\hat{I}^{\circ}$ -Sitosterol | PGR     | 0.8378 |
| HQ | Sitosterol, $\hat{I}^{\circ}$ -Sitosterol | PPARA   | 0.8378 |
| HQ | Sitosterol, $\hat{I}^{\circ}$ -Sitosterol | RORA    | 0.9714 |
| HQ | Sitosterol, $\hat{I}^{\circ}$ -Sitosterol | SIGMAR1 | 0.8378 |
| HQ | Sitosterol, $\hat{I}^{\circ}$ -Sitosterol | SULT2A1 | 0.8378 |
| HQ | Sitosterol, $\hat{I}^{\circ}$ -Sitosterol | SULT2B1 | 0.8649 |
| HQ | Sitosterol, $\hat{I}^{\circ}$ -Sitosterol | VDR     | 0.9714 |
| HQ | 4-Hydroxycoumarin,Folinic Acid            | ALDH1L1 | 0.8923 |
| HQ | 4-Hydroxycoumarin,Folinic Acid            | AMT     | 0.9265 |
| HQ | 4-Hydroxycoumarin,Folinic Acid            | ATIC    | 0.8923 |
| HQ | 4-Hydroxycoumarin,Folinic Acid            | DHRS4L1 | 0.8358 |
| HQ | 4-Hydroxycoumarin,Folinic Acid            | FOLR1   | 0.8462 |
| HQ | 4-Hydroxycoumarin,Folinic Acid            | FOLR2   | 0.8462 |
| HQ | 4-Hydroxycoumarin,Folinic Acid            | FOLR3   | 0.8462 |
| HQ | 4-Hydroxycoumarin,Folinic Acid            | FTCD    | 0.9254 |
| HQ | 4-Hydroxycoumarin,Folinic Acid            | MPN348  | 0.913  |
| HQ | 4-Hydroxycoumarin,Folinic Acid            | MTFMT   | 0.8923 |
| HQ | 4-Hydroxycoumarin,Folinic Acid            | MTHFD1  | 0.8923 |
| HQ | 4-Hydroxycoumarin,Folinic Acid            | MTHFD2  | 0.8923 |

|    |                                              |         |        |
|----|----------------------------------------------|---------|--------|
| HQ | 4-Hydroxycoumarin,Folinic Acid               | MTHFR   | 0.8923 |
| HQ | 4-Hydroxycoumarin,Folinic Acid               | MTR     | 0.8923 |
| HQ | 4-Hydroxycoumarin,Folinic Acid               | NQO2    | 0.8358 |
| HQ | 4-Hydroxycoumarin,Folinic Acid               | PNP     | 0.8143 |
| HQ | 4-Hydroxycoumarin,Folinic Acid               | SHMT1   | 0.913  |
| HQ | 4-Hydroxycoumarin,Folinic Acid               | SHMT2   | 0.8923 |
| HQ | 4-Hydroxycoumarin,Folinic Acid               | THYA    | 0.8358 |
| HQ | 4-Hydroxycoumarin,Folinic Acid               | TK      | 0.8358 |
| HQ | 4-Hydroxycoumarin,Folinic Acid               | TYMS    | 0.8358 |
| HQ | 4-Hydroxycoumarin,Folinic Acid               | UL30    | 0.8235 |
| HQ | Cetylic Acid,Hexadecanoic Acid,Palmitic Acid | ABAT    | 0.8095 |
| HQ | Cetylic Acid,Hexadecanoic Acid,Palmitic Acid | ABL1    | 1      |
| HQ | Cetylic Acid,Hexadecanoic Acid,Palmitic Acid | ACADSB  | 0.8095 |
| HQ | Cetylic Acid,Hexadecanoic Acid,Palmitic Acid | ACOX1   | 0.8    |
| HQ | Cetylic Acid,Hexadecanoic Acid,Palmitic Acid | ACSL3   | 0.8571 |
| HQ | Cetylic Acid,Hexadecanoic Acid,Palmitic Acid | ACSL4   | 0.8571 |
| HQ | Cetylic Acid,Hexadecanoic Acid,Palmitic Acid | ADH5    | 1      |
| HQ | Cetylic Acid,Hexadecanoic Acid,Palmitic Acid | ALDH5A1 | 0.8095 |
| HQ | Cetylic Acid,Hexadecanoic Acid,Palmitic Acid | ARF1    | 1      |
| HQ | Cetylic Acid,Hexadecanoic Acid,Palmitic Acid | ARF6    | 1      |
| HQ | Cetylic Acid,Hexadecanoic Acid,Palmitic Acid | C8G     | 1      |
| HQ | Cetylic Acid,Hexadecanoic Acid,Palmitic Acid | CALM1   | 1      |
| HQ | Cetylic Acid,Hexadecanoic Acid,Palmitic Acid | CNR1    | 0.8333 |
| HQ | Cetylic Acid,Hexadecanoic Acid,Palmitic Acid | CNR2    | 0.8333 |
| HQ | Cetylic Acid,Hexadecanoic Acid,Palmitic Acid | CYP2C8  | 1      |
| HQ | Cetylic Acid,Hexadecanoic Acid,Palmitic Acid | ECI2    | 1      |
| HQ | Cetylic Acid,Hexadecanoic Acid,Palmitic Acid | ELOVL4  | 0.8571 |



|    |                                              |         |        |
|----|----------------------------------------------|---------|--------|
| HQ | Cetylic Acid,Hexadecanoic Acid,Palmitic Acid | FADS1   | 0.8571 |
| HQ | Cetylic Acid,Hexadecanoic Acid,Palmitic Acid | FADS2   | 0.8571 |
| HQ | Cetylic Acid,Hexadecanoic Acid,Palmitic Acid | FFAR1   | 0.8571 |
| HQ | Cetylic Acid,Hexadecanoic Acid,Palmitic Acid | FKBP1A  | 1      |
| HQ | Cetylic Acid,Hexadecanoic Acid,Palmitic Acid | FURIN   | 1      |
| HQ | Cetylic Acid,Hexadecanoic Acid,Palmitic Acid | GLTP    | 1      |
| HQ | Cetylic Acid,Hexadecanoic Acid,Palmitic Acid | GM2A    | 1      |
| HQ | Cetylic Acid,Hexadecanoic Acid,Palmitic Acid | GUCA1A  | 1      |
| HQ | Cetylic Acid,Hexadecanoic Acid,Palmitic Acid | HAO1    | 0.8    |
| HQ | Cetylic Acid,Hexadecanoic Acid,Palmitic Acid | HDAC2   | 0.8095 |
| HQ | Cetylic Acid,Hexadecanoic Acid,Palmitic Acid | HDAC9   | 0.8095 |
| HQ | Cetylic Acid,Hexadecanoic Acid,Palmitic Acid | HNF4A   | 1      |
| HQ | Cetylic Acid,Hexadecanoic Acid,Palmitic Acid | HNF4G   | 1      |
| HQ | Cetylic Acid,Hexadecanoic Acid,Palmitic Acid | INS     | 1      |
| HQ | Cetylic Acid,Hexadecanoic Acid,Palmitic Acid | LALBA   | 1      |
| HQ | Cetylic Acid,Hexadecanoic Acid,Palmitic Acid | LIP3    | 1      |
| HQ | Cetylic Acid,Hexadecanoic Acid,Palmitic Acid | LTB4R   | 0.8    |
| HQ | Cetylic Acid,Hexadecanoic Acid,Palmitic Acid | LTB4R2  | 0.8    |
| HQ | Cetylic Acid,Hexadecanoic Acid,Palmitic Acid | LTF     | 1      |
| HQ | Cetylic Acid,Hexadecanoic Acid,Palmitic Acid | LY96    | 1      |
| HQ | Cetylic Acid,Hexadecanoic Acid,Palmitic Acid | NCOA1   | 1      |
| HQ | Cetylic Acid,Hexadecanoic Acid,Palmitic Acid | NR1H4   | 0.9524 |
| HQ | Cetylic Acid,Hexadecanoic Acid,Palmitic Acid | OGDH    | 0.8095 |
| HQ | Cetylic Acid,Hexadecanoic Acid,Palmitic Acid | PAEP    | 1      |
| HQ | Cetylic Acid,Hexadecanoic Acid,Palmitic Acid | PKIA    | 1      |
| HQ | Cetylic Acid,Hexadecanoic Acid,Palmitic Acid | PLA2G1B | 1      |
| HQ | Cetylic Acid,Hexadecanoic Acid,Palmitic Acid | PLA2G2A | 1      |

|    |                                              |             |        |
|----|----------------------------------------------|-------------|--------|
| HQ | Cetylic Acid,Hexadecanoic Acid,Palmitic Acid | PLA2G2D     | 1      |
| HQ | Cetylic Acid,Hexadecanoic Acid,Palmitic Acid | PLA2G2E     | 1      |
| HQ | Cetylic Acid,Hexadecanoic Acid,Palmitic Acid | PMP2        | 1      |
| HQ | Cetylic Acid,Hexadecanoic Acid,Palmitic Acid | PPARA       | 1      |
| HQ | Cetylic Acid,Hexadecanoic Acid,Palmitic Acid | PPARD       | 0.9524 |
| HQ | Cetylic Acid,Hexadecanoic Acid,Palmitic Acid | PPARG       | 1      |
| HQ | Cetylic Acid,Hexadecanoic Acid,Palmitic Acid | PPA_RS05235 | 0.9524 |
| HQ | Cetylic Acid,Hexadecanoic Acid,Palmitic Acid | PPP3CA      | 1      |
| HQ | Cetylic Acid,Hexadecanoic Acid,Palmitic Acid | PPP3R1      | 1      |
| HQ | Cetylic Acid,Hexadecanoic Acid,Palmitic Acid | PPT1        | 1      |
| HQ | Cetylic Acid,Hexadecanoic Acid,Palmitic Acid | PRKACA      | 1      |
| HQ | Cetylic Acid,Hexadecanoic Acid,Palmitic Acid | PTGS1       | 0.9524 |
| HQ | Cetylic Acid,Hexadecanoic Acid,Palmitic Acid | PTGS2       | 0.9524 |
| HQ | Cetylic Acid,Hexadecanoic Acid,Palmitic Acid | PVR         | 1      |
| HQ | Cetylic Acid,Hexadecanoic Acid,Palmitic Acid | RCVRN       | 1      |
| HQ | Cetylic Acid,Hexadecanoic Acid,Palmitic Acid | RHO         | 1      |
| HQ | Cetylic Acid,Hexadecanoic Acid,Palmitic Acid | RXRA        | 0.9524 |
| HQ | Cetylic Acid,Hexadecanoic Acid,Palmitic Acid | RXRB        | 0.8095 |
| HQ | Cetylic Acid,Hexadecanoic Acid,Palmitic Acid | RXRG        | 0.8095 |
| HQ | Cetylic Acid,Hexadecanoic Acid,Palmitic Acid | S100B       | 0.8571 |
| HQ | Cetylic Acid,Hexadecanoic Acid,Palmitic Acid | SCN10A      | 0.8095 |
| HQ | Cetylic Acid,Hexadecanoic Acid,Palmitic Acid | SCN11A      | 0.8095 |
| HQ | Cetylic Acid,Hexadecanoic Acid,Palmitic Acid | SCN1A       | 0.8095 |
| HQ | Cetylic Acid,Hexadecanoic Acid,Palmitic Acid | SCN1B       | 0.8095 |
| HQ | Cetylic Acid,Hexadecanoic Acid,Palmitic Acid | SCN2A       | 0.8095 |
| HQ | Cetylic Acid,Hexadecanoic Acid,Palmitic Acid | SCN2B       | 0.8095 |
| HQ | Cetylic Acid,Hexadecanoic Acid,Palmitic Acid | SCN3A       | 0.8095 |

|    |                                              |              |        |
|----|----------------------------------------------|--------------|--------|
| HQ | Cetylic Acid,Hexadecanoic Acid,Palmitic Acid | SCN3B        | 0.8095 |
| HQ | Cetylic Acid,Hexadecanoic Acid,Palmitic Acid | SCN4A        | 0.8095 |
| HQ | Cetylic Acid,Hexadecanoic Acid,Palmitic Acid | SCN4B        | 0.8095 |
| HQ | Cetylic Acid,Hexadecanoic Acid,Palmitic Acid | SCN5A        | 0.8095 |
| HQ | Cetylic Acid,Hexadecanoic Acid,Palmitic Acid | SCN7A        | 0.8095 |
| HQ | Cetylic Acid,Hexadecanoic Acid,Palmitic Acid | SCN8A        | 0.8095 |
| HQ | Cetylic Acid,Hexadecanoic Acid,Palmitic Acid | SCN9A        | 0.8095 |
| HQ | Cetylic Acid,Hexadecanoic Acid,Palmitic Acid | SEC14L2      | 1      |
| HQ | Cetylic Acid,Hexadecanoic Acid,Palmitic Acid | SLC8A1       | 0.8571 |
| HQ | Cetylic Acid,Hexadecanoic Acid,Palmitic Acid | SREBF1       | 0.8095 |
| HQ | Cetylic Acid,Hexadecanoic Acid,Palmitic Acid | TLR4         | 1      |
| HQ | Cetylic Acid,Hexadecanoic Acid,Palmitic Acid | TM1468       | 1      |
| HQ | Cetylic Acid,Hexadecanoic Acid,Palmitic Acid | TRAPPC3      | 1      |
| HQ | Cetylic Acid,Hexadecanoic Acid,Palmitic Acid | TRPV1        | 0.8571 |
| HQ | Cetylic Acid,Hexadecanoic Acid,Palmitic Acid | VLDLR        | 1      |
| HQ | Sucrose                                      | ABO          | 0.8158 |
| HQ | Sucrose                                      | ACTA1        | 1      |
| HQ | Sucrose                                      | AMY1A        | 0.8    |
| HQ | Sucrose                                      | AMY2A        | 0.8    |
| HQ | Sucrose                                      | AMY2B        | 0.8611 |
| HQ | Sucrose                                      | ATOX1        | 1      |
| HQ | Sucrose                                      | BAMF_RS28815 | 0.8    |
| HQ | Sucrose                                      | CYP2B6       | 0.8205 |
| HQ | Sucrose                                      | FHIT         | 0.8611 |
| HQ | Sucrose                                      | FTL          | 0.8333 |
| HQ | Sucrose                                      | GCK          | 0.8    |
| HQ | Sucrose                                      | GLT6D1       | 0.8611 |
| HQ | Sucrose                                      | GLTP         | 0.8611 |
| HQ | Sucrose                                      | GNPDA1       | 0.8    |
| HQ | Sucrose                                      | HBA1         | 0.8974 |
| HQ | Sucrose                                      | HBB          | 0.8333 |
| HQ | Sucrose                                      | HK1          | 0.8    |
| HQ | Sucrose                                      | IFNB1        | 0.8    |
| HQ | Sucrose                                      | KRTAP5-2     | 0.8    |
| HQ | Sucrose                                      | KRTAP5-3     | 0.8    |
| HQ | Sucrose                                      | LCTL         | 0.8    |
| HQ | Sucrose                                      | LGALS2       | 0.8    |
| HQ | Sucrose                                      | LGALS3       | 0.8611 |
| HQ | Sucrose                                      | LGALS7       | 0.8    |
| HQ | Sucrose                                      | LYZ          | 1      |

|    |                              |          |        |
|----|------------------------------|----------|--------|
| HQ | Sucrose                      | MB       | 0.8    |
| HQ | Sucrose                      | NCAN     | 0.8    |
| HQ | Sucrose                      | NUDT9    | 0.8    |
| HQ | Sucrose                      | PTGS1    | 0.8    |
| HQ | Sucrose                      | PYGL     | 0.8    |
| HQ | Sucrose                      | PYGM     | 0.8    |
| HQ | Sucrose                      | RTCB     | 1      |
| HQ | Sucrose                      | SFTPD    | 0.8    |
| HQ | Sucrose                      | SIGLEC1  | 0.8    |
| HQ | Sucrose                      | SMARCA5  | 0.8    |
| HQ | Sucrose                      | TAS1R2   | 1      |
| HQ | Sucrose                      | TM0024   | 0.8    |
| HQ | Choline                      | ACHE     | 1      |
| HQ | Choline                      | BCHE     | 1      |
| HQ | Choline                      | PCYT1A   | 1      |
| HQ | Choline                      | PCYT1B   | 1      |
| HQ | Choline                      | PHOSPHO1 | 1      |
| HQ | Choline                      | PLD1     | 1      |
| HQ | Choline                      | PLD2     | 1      |
| HQ | 3-Hydroxycoumarin,Folic Acid | ALDH1L1  | 0.9492 |
| HQ | 3-Hydroxycoumarin,Folic Acid | AMT      | 0.9492 |
| HQ | 3-Hydroxycoumarin,Folic Acid | ATIC     | 0.9492 |
| HQ | 3-Hydroxycoumarin,Folic Acid | DHFR     | 0.8596 |
| HQ | 3-Hydroxycoumarin,Folic Acid | DHRS4L1  | 0.8254 |
| HQ | 3-Hydroxycoumarin,Folic Acid | FOLR1    | 0.9649 |
| HQ | 3-Hydroxycoumarin,Folic Acid | FOLR2    | 0.9649 |
| HQ | 3-Hydroxycoumarin,Folic Acid | FOLR3    | 0.9649 |
| HQ | 3-Hydroxycoumarin,Folic Acid | FTCD     | 0.9492 |
| HQ | 3-Hydroxycoumarin,Folic Acid | GART     | 0.8361 |
| HQ | 3-Hydroxycoumarin,Folic Acid | MTFMT    | 0.9492 |
| HQ | 3-Hydroxycoumarin,Folic Acid | MTHFD1   | 0.9492 |
| HQ | 3-Hydroxycoumarin,Folic Acid | MTHFD2   | 0.9492 |
| HQ | 3-Hydroxycoumarin,Folic Acid | MTHFR    | 0.9492 |
| HQ | 3-Hydroxycoumarin,Folic Acid | MTR      | 0.9492 |
| HQ | 3-Hydroxycoumarin,Folic Acid | NQO2     | 0.8254 |
| HQ | 3-Hydroxycoumarin,Folic Acid | SHMT1    | 0.9492 |
| HQ | 3-Hydroxycoumarin,Folic Acid | SHMT2    | 0.9492 |
| HQ | 3-Hydroxycoumarin,Folic Acid | THYA     | 0.8254 |
| HQ | 3-Hydroxycoumarin,Folic Acid | TYMS     | 0.8596 |
| HQ | Kumatakenin                  | ACTB     | 0.8125 |
| HQ | Kumatakenin                  | AHR      | 0.8125 |
| HQ | Kumatakenin                  | AKT1     | 0.8065 |
| HQ | Kumatakenin                  | ATP5A1   | 0.8125 |
| HQ | Kumatakenin                  | ATP5B    | 0.8125 |
| HQ | Kumatakenin                  | ATP5C1   | 0.8125 |
| HQ | Kumatakenin                  | CBR1     | 0.8125 |
| HQ | Kumatakenin                  | CDK6     | 0.8387 |
| HQ | Kumatakenin                  | CEBPB    | 0.8125 |
| HQ | Kumatakenin                  | COMT     | 0.8125 |
| HQ | Kumatakenin                  | CSNK2A1  | 0.8125 |
| HQ | Kumatakenin                  | CSNK2B   | 0.8125 |
| HQ | Kumatakenin                  | CYP1B1   | 0.8125 |
| HQ | Kumatakenin                  | EIF3F    | 0.8125 |
| HQ | Kumatakenin                  | ESR1     | 0.8125 |
| HQ | Kumatakenin                  | ESR2     | 0.8125 |

|    |                        |          |        |
|----|------------------------|----------|--------|
| HQ | Kumatakenin            | ESRR     | 0.8065 |
| HQ | Kumatakenin            | ESRRB    | 0.8065 |
| HQ | Kumatakenin            | GABRA1   | 0.9677 |
| HQ | Kumatakenin            | GABRA2   | 0.9677 |
| HQ | Kumatakenin            | GABRA3   | 0.9677 |
| HQ | Kumatakenin            | GABRA4   | 0.9677 |
| HQ | Kumatakenin            | GABRA5   | 0.9677 |
| HQ | Kumatakenin            | GABRA6   | 0.9677 |
| HQ | Kumatakenin            | GABRG1   | 0.9677 |
| HQ | Kumatakenin            | GABRG2   | 0.9677 |
| HQ | Kumatakenin            | GABRG3   | 0.9677 |
| HQ | Kumatakenin            | GPER1    | 0.8065 |
| HQ | Kumatakenin            | HCK      | 0.8125 |
| HQ | Kumatakenin            | HIBCH    | 0.8125 |
| HQ | Kumatakenin            | HSP90AA1 | 0.8125 |
| HQ | Kumatakenin            | HSPA2    | 0.8125 |
| HQ | Kumatakenin            | IGHG1    | 0.8065 |
| HQ | Kumatakenin            | JAK1     | 0.8125 |
| HQ | Kumatakenin            | MTTP     | 0.8788 |
| HQ | Kumatakenin            | NCOA1    | 0.8065 |
| HQ | Kumatakenin            | NCOA2    | 0.8065 |
| HQ | Kumatakenin            | NQO2     | 0.8125 |
| HQ | Kumatakenin            | NR1I2    | 0.8125 |
| HQ | Kumatakenin            | PIK3CG   | 0.8125 |
| HQ | Kumatakenin            | PIM1     | 0.8125 |
| HQ | Kumatakenin            | PTK2B    | 0.8065 |
| HQ | Kumatakenin            | RUVBL2   | 0.8125 |
| HQ | Kumatakenin            | SF3B3    | 0.8125 |
| HQ | Kumatakenin            | SHBG     | 0.8788 |
| HQ | Kumatakenin            | SOAT1    | 0.8788 |
| HQ | Kumatakenin            | SOAT2    | 0.8788 |
| HQ | Kumatakenin            | STK17B   | 0.8125 |
| HQ | Kumatakenin            | TOP2A    | 0.8065 |
| HQ | Kumatakenin            | UBA1     | 0.8125 |
| HQ | Kumatakenin            | UGT3A1   | 0.8387 |
| HQ | Îtaine                 | BCL2     | 1      |
| HQ | Îtaine                 | CES1     | 0.8065 |
| HQ | Îtaine                 | CHRM3    | 0.8929 |
| HQ | Îtaine                 | CPT1A    | 0.8065 |
| HQ | Îtaine                 | CPT2     | 0.8065 |
| HQ | Îtaine                 | CRAT     | 0.8065 |
| HQ | Îtaine                 | CROT     | 0.8065 |
| HQ | Îtaine                 | MPO      | 0.8065 |
| HQ | Îtaine                 | SLC22A4  | 0.8065 |
| HQ | Îtaine                 | SLC22A5  | 0.8065 |
| HQ | Îtaine                 | SLC25A20 | 0.8065 |
| HQ | Îtaine                 | SLC25A29 | 0.8065 |
| HQ | Îtaine                 | XDH      | 0.8065 |
| HQ | Acetyl Astragaloside I | ATP1A1   | 0.8793 |
| HQ | Acetyl Astragaloside I | ATP1A2   | 0.8621 |
| HQ | Acetyl Astragaloside I | ATP1A3   | 0.8621 |
| HQ | Acetyl Astragaloside I | GABRB3   | 0.8033 |
| HQ | Acetyl Astragaloside I | GLRA3    | 0.8033 |
| HQ | Acetyl Astragaloside I | SLCO1B3  | 0.8448 |
| HQ | Astragaloside I        | ATP1A1   | 0.8793 |

|    |                    |         |        |
|----|--------------------|---------|--------|
| HQ | Astragaloside I    | ATP1A2  | 0.8621 |
| HQ | Astragaloside I    | ATP1A3  | 0.8621 |
| HQ | Astragaloside I    | GABRB3  | 0.8033 |
| HQ | Astragaloside I    | GLRA3   | 0.8033 |
| HQ | Astragaloside I    | SLCO1B3 | 0.8448 |
| HQ | Astragaloside Ii   | ATP1A1  | 0.8947 |
| HQ | Astragaloside Ii   | ATP1A2  | 0.8772 |
| HQ | Astragaloside Ii   | ATP1A3  | 0.8772 |
| HQ | Astragaloside Ii   | SLCO1B3 | 0.8596 |
| HQ | Astragaloside Iii  | ATP1A1  | 0.8772 |
| HQ | Astragaloside Iii  | ATP1A2  | 0.8596 |
| HQ | Astragaloside Iii  | ATP1A3  | 0.8596 |
| HQ | Astragaloside Iii  | SLCO1B3 | 0.875  |
| HQ | Astragaloside Iv   | ATP1A1  | 0.8772 |
| HQ | Astragaloside Iv   | ATP1A2  | 0.8596 |
| HQ | Astragaloside Iv   | ATP1A3  | 0.8596 |
| HQ | Astragaloside Iv   | SLCO1B3 | 0.875  |
| HQ | Astragaloside V    | ATP1A1  | 0.8772 |
| HQ | Astragaloside V    | ATP1A2  | 0.8596 |
| HQ | Astragaloside V    | ATP1A3  | 0.8596 |
| HQ | Astragaloside V    | SLCO1B3 | 0.875  |
| HQ | Astragaloside Vi   | ATP1A1  | 0.8772 |
| HQ | Astragaloside Vi   | ATP1A2  | 0.8596 |
| HQ | Astragaloside Vi   | ATP1A3  | 0.8596 |
| HQ | Astragaloside Vi   | SLCO1B3 | 0.875  |
| HQ | Astragaloside Vii  | ATP1A1  | 0.8772 |
| HQ | Astragaloside Vii  | ATP1A2  | 0.8596 |
| HQ | Astragaloside Vii  | ATP1A3  | 0.8596 |
| HQ | Astragaloside Vii  | SLCO1B3 | 0.875  |
| HQ | Astragaloside Viii | ANXA1   | 0.8    |
| HQ | Astragaloside Viii | ATP1A1  | 0.9107 |
| HQ | Astragaloside Viii | ATP1A2  | 0.8929 |
| HQ | Astragaloside Viii | ATP1A3  | 0.8929 |
| HQ | Astragaloside Viii | CASP3   | 0.8704 |
| HQ | Astragaloside Viii | GABRB3  | 0.8621 |
| HQ | Astragaloside Viii | GLRA3   | 0.8621 |
| HQ | Astragaloside Viii | HSD11B1 | 0.8704 |
| HQ | Astragaloside Viii | HSD11B2 | 0.8    |
| HQ | Astragaloside Viii | HSD3B1  | 0.8    |
| HQ | Astragaloside Viii | IL1B    | 0.8214 |
| HQ | Astragaloside Viii | IL6     | 0.8214 |
| HQ | Astragaloside Viii | LPL     | 0.8704 |
| HQ | Astragaloside Viii | NFKB1   | 0.8704 |
| HQ | Astragaloside Viii | NFKB2   | 0.8704 |
| HQ | Astragaloside Viii | NR3C1   | 0.8393 |
| HQ | Astragaloside Viii | PPP1CC  | 0.8393 |
| HQ | Astragaloside Viii | SLCO1B3 | 0.9444 |
| HQ | Astragaloside Viii | TNF     | 0.8704 |
| HQ | Astragaloside Viii | VDR     | 0.8182 |
| HQ | Astragaloside Viii | YWHAE   | 0.8448 |
| HQ | Astramembrannin I  | ATP1A1  | 0.8772 |
| HQ | Astramembrannin I  | ATP1A2  | 0.8596 |
| HQ | Astramembrannin I  | ATP1A3  | 0.8596 |
| HQ | Astramembrannin I  | SLCO1B3 | 0.875  |
| HQ | Astramembrannin Ii | ATP1A1  | 0.8704 |

|    |                                                          |              |        |
|----|----------------------------------------------------------|--------------|--------|
| HQ | Astramembrannin Ii                                       | ATP1A2       | 0.807  |
| HQ | Astramembrannin Ii                                       | ATP1A3       | 0.807  |
| HQ | Astramembrannin Ii                                       | SLCO1B3      | 0.8214 |
| HQ | Glucuronic Acid                                          | ACHE         | 0.913  |
| HQ | Glucuronic Acid                                          | AMY2A        | 0.913  |
| HQ | Glucuronic Acid                                          | BAMF RS28815 | 0.913  |
| HQ | Glucuronic Acid                                          | IGHG1        | 0.913  |
| HQ | Glucuronic Acid                                          | LTF          | 0.913  |
| HQ | Glucuronic Acid                                          | MBL2         | 0.8077 |
| HQ | Glucuronic Acid                                          | TM0306       | 0.913  |
| HQ | 2'-Hydroxy-3',4'-Dimethoxy-Isoflavane-7-O-Î'-D-Glucoside | AHR          | 0.8864 |
| HQ | 2'-Hydroxy-3',4'-Dimethoxy-Isoflavane-7-O-Î'-D-Glucoside | AKR1C3       | 0.8409 |
| HQ | 2'-Hydroxy-3',4'-Dimethoxy-Isoflavane-7-O-Î'-D-Glucoside | ALDH2        | 0.8409 |
| HQ | 2'-Hydroxy-3',4'-Dimethoxy-Isoflavane-7-O-Î'-D-Glucoside | AR           | 0.8182 |
| HQ | 2'-Hydroxy-3',4'-Dimethoxy-Isoflavane-7-O-Î'-D-Glucoside | AURKB        | 0.8864 |
| HQ | 2'-Hydroxy-3',4'-Dimethoxy-Isoflavane-7-O-Î'-D-Glucoside | CBR1         | 0.8409 |
| HQ | Isoastragaloside I                                       | ATP1A1       | 0.8793 |
| HQ | Isoastragaloside I                                       | ATP1A2       | 0.8621 |
| HQ | Isoastragaloside I                                       | ATP1A3       | 0.8621 |
| HQ | Isoastragaloside I                                       | GABRB3       | 0.8033 |
| HQ | Isoastragaloside I                                       | GLRA3        | 0.8033 |
| HQ | Isoastragaloside I                                       | SLCO1B3      | 0.8448 |
| HQ | Isoastragaloside Ii                                      | ATP1A1       | 0.8947 |
| HQ | Isoastragaloside Ii                                      | ATP1A2       | 0.8772 |
| HQ | Isoastragaloside Ii                                      | ATP1A3       | 0.8772 |
| HQ | Isoastragaloside Ii                                      | SLCO1B3      | 0.8596 |
| HQ | Astrasieversianin Ix                                     | ATP1A1       | 0.8727 |
| HQ | Astrasieversianin Ix                                     | ATP1A2       | 0.8421 |
| HQ | Astrasieversianin Ix                                     | ATP1A3       | 0.8421 |
| HQ | Astrasieversianin Ix                                     | SLCO1B3      | 0.8246 |
| NX | Oleanolic Acid                                           | ADH1C        | 0.8049 |
| NX | Oleanolic Acid                                           | AKR1C1       | 0.8462 |
| NX | Oleanolic Acid                                           | AKR1C2       | 0.8462 |
| NX | Oleanolic Acid                                           | AR           | 0.875  |
| NX | Oleanolic Acid                                           | CES1         | 0.8049 |
| NX | Oleanolic Acid                                           | CLEC4E       | 0.8    |
| NX | Oleanolic Acid                                           | COX4I1       | 0.8049 |
| NX | Oleanolic Acid                                           | COX5A        | 0.8049 |
| NX | Oleanolic Acid                                           | COX5B        | 0.8049 |
| NX | Oleanolic Acid                                           | COX6A2       | 0.8049 |
| NX | Oleanolic Acid                                           | COX6B1       | 0.8049 |
| NX | Oleanolic Acid                                           | COX6C        | 0.8049 |
| NX | Oleanolic Acid                                           | COX7A1       | 0.8049 |
| NX | Oleanolic Acid                                           | COX7B        | 0.8049 |
| NX | Oleanolic Acid                                           | COX7C        | 0.8049 |
| NX | Oleanolic Acid                                           | COX8A        | 0.8049 |
| NX | Oleanolic Acid                                           | EFTUD1       | 0.8049 |
| NX | Oleanolic Acid                                           | ESR1         | 0.8718 |
| NX | Oleanolic Acid                                           | ESR2         | 0.8205 |

|    |                |         |        |
|----|----------------|---------|--------|
| NX | Oleanolic Acid | ESRRG   | 0.8049 |
| NX | Oleanolic Acid | FABP6   | 0.8049 |
| NX | Oleanolic Acid | FECH    | 0.8049 |
| NX | Oleanolic Acid | GABRA1  | 0.8205 |
| NX | Oleanolic Acid | GABRA2  | 0.8205 |
| NX | Oleanolic Acid | GABRA3  | 0.8205 |
| NX | Oleanolic Acid | GABRA4  | 0.8205 |
| NX | Oleanolic Acid | GABRA5  | 0.8205 |
| NX | Oleanolic Acid | GABRA6  | 0.8205 |
| NX | Oleanolic Acid | GABRB1  | 0.8205 |
| NX | Oleanolic Acid | GABRB2  | 0.8205 |
| NX | Oleanolic Acid | GABRB3  | 0.8205 |
| NX | Oleanolic Acid | GABRD   | 0.8205 |
| NX | Oleanolic Acid | GABRE   | 0.8205 |
| NX | Oleanolic Acid | GABRG1  | 0.8205 |
| NX | Oleanolic Acid | GABRG2  | 0.8205 |
| NX | Oleanolic Acid | GABRG3  | 0.8205 |
| NX | Oleanolic Acid | GABRP   | 0.8205 |
| NX | Oleanolic Acid | GABRQ   | 0.8205 |
| NX | Oleanolic Acid | GPBAR1  | 0.8049 |
| NX | Oleanolic Acid | GRIN1   | 0.8205 |
| NX | Oleanolic Acid | GRIN2A  | 0.8205 |
| NX | Oleanolic Acid | GRIN2B  | 0.8205 |
| NX | Oleanolic Acid | GRIN2C  | 0.8205 |
| NX | Oleanolic Acid | GRIN2D  | 0.8205 |
| NX | Oleanolic Acid | GRIN3A  | 0.8205 |
| NX | Oleanolic Acid | GRIN3B  | 0.8205 |
| NX | Oleanolic Acid | GSTP1   | 0.8049 |
| NX | Oleanolic Acid | HOXA10  | 0.814  |
| NX | Oleanolic Acid | HSD11B1 | 0.9048 |
| NX | Oleanolic Acid | HSD11B2 | 0.8571 |
| NX | Oleanolic Acid | HSD17B1 | 0.8205 |
| NX | Oleanolic Acid | IGHG2   | 0.814  |
| NX | Oleanolic Acid | LSS     | 0.825  |
| NX | Oleanolic Acid | MT-CO1  | 0.8049 |
| NX | Oleanolic Acid | MT-CO2  | 0.8049 |
| NX | Oleanolic Acid | MT-CO3  | 0.8049 |
| NX | Oleanolic Acid | NCOA2   | 0.8462 |
| NX | Oleanolic Acid | NFKB1   | 0.85   |
| NX | Oleanolic Acid | NFKB2   | 0.85   |
| NX | Oleanolic Acid | NPPB    | 0.875  |
| NX | Oleanolic Acid | NR1H4   | 0.8049 |
| NX | Oleanolic Acid | NR1I2   | 0.8462 |
| NX | Oleanolic Acid | NR1I3   | 0.8205 |
| NX | Oleanolic Acid | NR3C1   | 0.85   |
| NX | Oleanolic Acid | NR3C2   | 0.8462 |
| NX | Oleanolic Acid | PGR     | 0.8462 |
| NX | Oleanolic Acid | PLA2G1B | 0.8049 |
| NX | Oleanolic Acid | PPARA   | 0.8205 |
| NX | Oleanolic Acid | PRLR    | 0.8372 |
| NX | Oleanolic Acid | RORA    | 0.8    |
| NX | Oleanolic Acid | SHBG    | 0.8    |
| NX | Oleanolic Acid | SIGMAR1 | 0.8205 |
| NX | Oleanolic Acid | SULT2A1 | 0.8205 |
| NX | Oleanolic Acid | SULT2B1 | 0.8462 |



|    |                             |         |        |
|----|-----------------------------|---------|--------|
| NX | Oleanolic Acid              | VDR     | 0.8293 |
| NX | Î <sup>c</sup> -Spinasterol | AKR1C1  | 0.8421 |
| NX | Î <sup>c</sup> -Spinasterol | AKR1C2  | 0.8421 |
| NX | Î <sup>c</sup> -Spinasterol | AR      | 0.8684 |
| NX | Î <sup>c</sup> -Spinasterol | CLEC4E  | 0.9444 |
| NX | Î <sup>c</sup> -Spinasterol | CYP27B1 | 0.8049 |
| NX | Î <sup>c</sup> -Spinasterol | ESR1    | 0.8684 |
| NX | Î <sup>c</sup> -Spinasterol | ESR2    | 0.8158 |
| NX | Î <sup>c</sup> -Spinasterol | GABRA1  | 0.8158 |
| NX | Î <sup>c</sup> -Spinasterol | GABRA2  | 0.8158 |
| NX | Î <sup>c</sup> -Spinasterol | GABRA3  | 0.8158 |
| NX | Î <sup>c</sup> -Spinasterol | GABRA4  | 0.8158 |
| NX | Î <sup>c</sup> -Spinasterol | GABRA5  | 0.8158 |
| NX | Î <sup>c</sup> -Spinasterol | GABRA6  | 0.8158 |
| NX | Î <sup>c</sup> -Spinasterol | GABRB1  | 0.8158 |
| NX | Î <sup>c</sup> -Spinasterol | GABRB2  | 0.8158 |
| NX | Î <sup>c</sup> -Spinasterol | GABRB3  | 0.8158 |
| NX | Î <sup>c</sup> -Spinasterol | GABRD   | 0.8158 |
| NX | Î <sup>c</sup> -Spinasterol | GABRE   | 0.8158 |
| NX | Î <sup>c</sup> -Spinasterol | GABRG1  | 0.8158 |
| NX | Î <sup>c</sup> -Spinasterol | GABRG2  | 0.8158 |
| NX | Î <sup>c</sup> -Spinasterol | GABRG3  | 0.8158 |
| NX | Î <sup>c</sup> -Spinasterol | GABRP   | 0.8158 |
| NX | Î <sup>c</sup> -Spinasterol | GABRQ   | 0.8158 |
| NX | Î <sup>c</sup> -Spinasterol | GRIN1   | 0.8158 |
| NX | Î <sup>c</sup> -Spinasterol | GRIN2A  | 0.8158 |
| NX | Î <sup>c</sup> -Spinasterol | GRIN2B  | 0.8158 |
| NX | Î <sup>c</sup> -Spinasterol | GRIN2C  | 0.8158 |
| NX | Î <sup>c</sup> -Spinasterol | GRIN2D  | 0.8158 |
| NX | Î <sup>c</sup> -Spinasterol | GRIN3A  | 0.8158 |
| NX | Î <sup>c</sup> -Spinasterol | GRIN3B  | 0.8158 |
| NX | Î <sup>c</sup> -Spinasterol | HOXA10  | 0.8095 |
| NX | Î <sup>c</sup> -Spinasterol | HSD17B1 | 0.8158 |
| NX | Î <sup>c</sup> -Spinasterol | LIP3    | 0.8    |
| NX | Î <sup>c</sup> -Spinasterol | LSS     | 0.9722 |
| NX | Î <sup>c</sup> -Spinasterol | MED1    | 0.8049 |
| NX | Î <sup>c</sup> -Spinasterol | NCOA2   | 0.8421 |
| NX | Î <sup>c</sup> -Spinasterol | NFKB1   | 0.8    |
| NX | Î <sup>c</sup> -Spinasterol | NFKB2   | 0.8    |
| NX | Î <sup>c</sup> -Spinasterol | NR1I2   | 0.8421 |
| NX | Î <sup>c</sup> -Spinasterol | NR1I3   | 0.9444 |
| NX | Î <sup>c</sup> -Spinasterol | NR3C1   | 0.85   |
| NX | Î <sup>c</sup> -Spinasterol | NR3C2   | 0.8421 |
| NX | Î <sup>c</sup> -Spinasterol | PGR     | 0.8649 |
| NX | Î <sup>c</sup> -Spinasterol | PPARA   | 0.8158 |
| NX | Î <sup>c</sup> -Spinasterol | RORA    | 0.9444 |
| NX | Î <sup>c</sup> -Spinasterol | RXRA    | 0.8049 |
| NX | Î <sup>c</sup> -Spinasterol | SHBG    | 0.8205 |
| NX | Î <sup>c</sup> -Spinasterol | SIGMAR1 | 0.8158 |
| NX | Î <sup>c</sup> -Spinasterol | SRD5A1  | 0.8205 |
| NX | Î <sup>c</sup> -Spinasterol | SULT2A1 | 0.8158 |
| NX | Î <sup>c</sup> -Spinasterol | SULT2B1 | 0.8421 |
| NX | Î <sup>c</sup> -Spinasterol | VDR     | 0.9444 |
| NX | Ecdysterone,Folic Acid      | ADH1C   | 0.814  |
| NX | Ecdysterone,Folic Acid      | AKR1C1  | 0.8095 |

|    |                        |         |        |
|----|------------------------|---------|--------|
| NX | Ecdysterone,Folic Acid | AKR1C2  | 0.814  |
| NX | Ecdysterone,Folic Acid | ANXA1   | 0.8333 |
| NX | Ecdysterone,Folic Acid | AR      | 0.8372 |
| NX | Ecdysterone,Folic Acid | CES1    | 0.814  |
| NX | Ecdysterone,Folic Acid | CLEC4E  | 0.8095 |
| NX | Ecdysterone,Folic Acid | COX4I1  | 0.814  |
| NX | Ecdysterone,Folic Acid | COX5A   | 0.814  |
| NX | Ecdysterone,Folic Acid | COX5B   | 0.814  |
| NX | Ecdysterone,Folic Acid | COX6A2  | 0.814  |
| NX | Ecdysterone,Folic Acid | COX6B1  | 0.814  |
| NX | Ecdysterone,Folic Acid | COX6C   | 0.814  |
| NX | Ecdysterone,Folic Acid | COX7A1  | 0.814  |
| NX | Ecdysterone,Folic Acid | COX7B   | 0.814  |
| NX | Ecdysterone,Folic Acid | COX7C   | 0.814  |
| NX | Ecdysterone,Folic Acid | COX8A   | 0.814  |
| NX | Ecdysterone,Folic Acid | EFTUD1  | 0.814  |
| NX | Ecdysterone,Folic Acid | ESR1    | 0.8333 |
| NX | Ecdysterone,Folic Acid | ESRRG   | 0.814  |
| NX | Ecdysterone,Folic Acid | FABP6   | 0.814  |
| NX | Ecdysterone,Folic Acid | FECH    | 0.814  |
| NX | Ecdysterone,Folic Acid | GPBAR1  | 0.814  |
| NX | Ecdysterone,Folic Acid | GSTP1   | 0.814  |
| NX | Ecdysterone,Folic Acid | HDAC2   | 0.8298 |
| NX | Ecdysterone,Folic Acid | HOXA10  | 0.8222 |
| NX | Ecdysterone,Folic Acid | HSD11B1 | 0.8667 |
| NX | Ecdysterone,Folic Acid | HSD11B2 | 0.8636 |
| NX | Ecdysterone,Folic Acid | HSD3B1  | 0.8333 |
| NX | Ecdysterone,Folic Acid | IGHG2   | 0.8222 |
| NX | Ecdysterone,Folic Acid | LSS     | 0.8333 |
| NX | Ecdysterone,Folic Acid | MT-CO1  | 0.814  |
| NX | Ecdysterone,Folic Acid | MT-CO2  | 0.814  |
| NX | Ecdysterone,Folic Acid | MT-CO3  | 0.814  |
| NX | Ecdysterone,Folic Acid | NCOA1   | 0.8261 |
| NX | Ecdysterone,Folic Acid | NCOA2   | 0.8095 |
| NX | Ecdysterone,Folic Acid | NFKB1   | 0.814  |
| NX | Ecdysterone,Folic Acid | NFKB2   | 0.814  |
| NX | Ecdysterone,Folic Acid | NPPB    | 0.8372 |
| NX | Ecdysterone,Folic Acid | NR1H4   | 0.814  |
| NX | Ecdysterone,Folic Acid | NR1I2   | 0.814  |
| NX | Ecdysterone,Folic Acid | NR1I3   | 0.8095 |
| NX | Ecdysterone,Folic Acid | NR3C1   | 0.8333 |
| NX | Ecdysterone,Folic Acid | NR3C2   | 0.8261 |
| NX | Ecdysterone,Folic Acid | PGR     | 0.8333 |
| NX | Ecdysterone,Folic Acid | PLA2G1B | 0.814  |
| NX | Ecdysterone,Folic Acid | PRLR    | 0.8043 |
| NX | Ecdysterone,Folic Acid | RORA    | 0.8095 |
| NX | Ecdysterone,Folic Acid | SULT2B1 | 0.8095 |
| NX | Ecdysterone,Folic Acid | VDR     | 0.8372 |
| NX | Chrysophanol           | AHR     | 0.9565 |
| NX | Chrysophanol           | ALOX5   | 0.913  |
| NX | Chrysophanol           | CSNK2A1 | 0.9565 |
| NX | Chrysophanol           | CYP1A2  | 0.84   |
| NX | Chrysophanol           | CYP2C9  | 0.84   |
| NX | Chrysophanol           | CYP2D6  | 0.84   |
| NX | Chrysophanol           | CYP2E1  | 0.84   |

|    |                                                         |          |        |
|----|---------------------------------------------------------|----------|--------|
| NX | Chrysophanol                                            | CYP3A4   | 0.84   |
| NX | Chrysophanol                                            | CYP3A43  | 0.84   |
| NX | Chrysophanol                                            | CYP3A5   | 0.84   |
| NX | Chrysophanol                                            | CYP3A7   | 0.84   |
| NX | Chrysophanol                                            | GSTA1    | 0.9167 |
| NX | Chrysophanol                                            | GSTP1    | 0.9167 |
| NX | Chrysophanol                                            | KRT12    | 0.8261 |
| NX | Chrysophanol                                            | KRT2     | 0.8261 |
| NX | Chrysophanol                                            | MAPK8IP1 | 0.8261 |
| NX | Chrysophanol                                            | NR1H2    | 0.913  |
| NX | Chrysophanol                                            | NR1H3    | 0.913  |
| NX | Î <sup>c</sup> -Spinasterol-Î <sup>2</sup> -D-Glucoside | ANXA1    | 0.8148 |
| NX | Î <sup>c</sup> -Spinasterol-Î <sup>2</sup> -D-Glucoside | ATP1A1   | 0.8421 |
| NX | Î <sup>c</sup> -Spinasterol-Î <sup>2</sup> -D-Glucoside | ATP1A2   | 0.8246 |
| NX | Î <sup>c</sup> -Spinasterol-Î <sup>2</sup> -D-Glucoside | ATP1A3   | 0.8246 |
| NX | Î <sup>c</sup> -Spinasterol-Î <sup>2</sup> -D-Glucoside | CASP3    | 0.8333 |
| NX | Î <sup>c</sup> -Spinasterol-Î <sup>2</sup> -D-Glucoside | GABRB3   | 0.8596 |
| NX | Î <sup>c</sup> -Spinasterol-Î <sup>2</sup> -D-Glucoside | GLRA3    | 0.8596 |
| NX | Î <sup>c</sup> -Spinasterol-Î <sup>2</sup> -D-Glucoside | HSD11B1  | 0.8333 |
| NX | Î <sup>c</sup> -Spinasterol-Î <sup>2</sup> -D-Glucoside | HSD11B2  | 0.8148 |
| NX | Î <sup>c</sup> -Spinasterol-Î <sup>2</sup> -D-Glucoside | HSD3B1   | 0.8148 |
| NX | Î <sup>c</sup> -Spinasterol-Î <sup>2</sup> -D-Glucoside | LPL      | 0.8333 |
| NX | Î <sup>c</sup> -Spinasterol-Î <sup>2</sup> -D-Glucoside | NFKB1    | 0.8333 |
| NX | Î <sup>c</sup> -Spinasterol-Î <sup>2</sup> -D-Glucoside | NFKB2    | 0.8333 |
| NX | Î <sup>c</sup> -Spinasterol-Î <sup>2</sup> -D-Glucoside | NR3C1    | 0.8148 |
| NX | Î <sup>c</sup> -Spinasterol-Î <sup>2</sup> -D-Glucoside | PPP1CC   | 0.8036 |
| NX | Î <sup>c</sup> -Spinasterol-Î <sup>2</sup> -D-Glucoside | SLCO1B3  | 0.9074 |
| NX | Î <sup>c</sup> -Spinasterol-Î <sup>2</sup> -D-Glucoside | TNF      | 0.8333 |
| NX | Î <sup>c</sup> -Spinasterol-Î <sup>2</sup> -D-Glucoside | VDR      | 0.8148 |
| NX | Î <sup>c</sup> -Spinasterol-Î <sup>2</sup> -D-Glucoside | YWHAE    | 0.8103 |
| NX | Achyranthoside I                                        | ANXA1    | 0.8182 |
| NX | Achyranthoside I                                        | ATP1A1   | 0.8947 |
| NX | Achyranthoside I                                        | ATP1A2   | 0.8772 |
| NX | Achyranthoside I                                        | ATP1A3   | 0.8772 |
| NX | Achyranthoside I                                        | CASP3    | 0.8889 |
| NX | Achyranthoside I                                        | GABRB3   | 0.8793 |
| NX | Achyranthoside I                                        | GLRA3    | 0.8793 |
| NX | Achyranthoside I                                        | HMGCR    | 0.8    |
| NX | Achyranthoside I                                        | HSD11B1  | 0.8889 |
| NX | Achyranthoside I                                        | HSD11B2  | 0.8182 |
| NX | Achyranthoside I                                        | HSD3B1   | 0.8182 |
| NX | Achyranthoside I                                        | IL1B     | 0.807  |
| NX | Achyranthoside I                                        | IL6      | 0.807  |
| NX | Achyranthoside I                                        | ITGAL    | 0.8    |
| NX | Achyranthoside I                                        | ITGB2    | 0.8    |
| NX | Achyranthoside I                                        | LPL      | 0.8889 |
| NX | Achyranthoside I                                        | NFKB1    | 0.8889 |
| NX | Achyranthoside I                                        | NFKB2    | 0.8889 |
| NX | Achyranthoside I                                        | NR3C1    | 0.8571 |
| NX | Achyranthoside I                                        | PPP1CC   | 0.8246 |
| NX | Achyranthoside I                                        | SLCO1B3  | 0.9273 |
| NX | Achyranthoside I                                        | TNF      | 0.8889 |
| NX | Achyranthoside I                                        | VDR      | 0.8036 |
| NX | Achyranthoside I                                        | YWHAE    | 0.8621 |
| NX | Achyranthoside Ii                                       | ADCY2    | 0.8077 |

|    |                   |         |        |
|----|-------------------|---------|--------|
| NX | Achyranthoside Ii | ADCY5   | 0.8077 |
| NX | Achyranthoside Ii | ANXA1   | 0.8654 |
| NX | Achyranthoside Ii | ATP1A1  | 0.8545 |
| NX | Achyranthoside Ii | ATP1A2  | 0.8246 |
| NX | Achyranthoside Ii | ATP1A3  | 0.8246 |
| NX | Achyranthoside Ii | CASP3   | 0.9038 |
| NX | Achyranthoside Ii | CFTR    | 0.8077 |
| NX | Achyranthoside Ii | GABRB3  | 0.8596 |
| NX | Achyranthoside Ii | GLRA3   | 0.8596 |
| NX | Achyranthoside Ii | GNAS    | 0.8077 |
| NX | Achyranthoside Ii | HMGCR   | 0.8462 |
| NX | Achyranthoside Ii | HSD11B1 | 0.9038 |
| NX | Achyranthoside Ii | HSD11B2 | 0.8654 |
| NX | Achyranthoside Ii | HSD3B1  | 0.8654 |
| NX | Achyranthoside Ii | ITGAL   | 0.8462 |
| NX | Achyranthoside Ii | ITGB2   | 0.8462 |
| NX | Achyranthoside Ii | LPL     | 0.9038 |
| NX | Achyranthoside Ii | NFKB1   | 0.9038 |
| NX | Achyranthoside Ii | NFKB2   | 0.9038 |
| NX | Achyranthoside Ii | NR3C1   | 0.8654 |
| NX | Achyranthoside Ii | PPP1CC  | 0.8364 |
| NX | Achyranthoside Ii | SLCO1B3 | 0.8727 |
| NX | Achyranthoside Ii | TNF     | 0.9038 |
| NX | Achyranthoside Ii | YWHAE   | 0.875  |
| NX | Bidentatoside I   | ANXA1   | 0.8182 |
| NX | Bidentatoside I   | ATP1A1  | 0.8947 |
| NX | Bidentatoside I   | ATP1A2  | 0.8772 |
| NX | Bidentatoside I   | ATP1A3  | 0.8772 |
| NX | Bidentatoside I   | CASP3   | 0.8889 |
| NX | Bidentatoside I   | GABRB3  | 0.8793 |
| NX | Bidentatoside I   | GLRA3   | 0.8793 |
| NX | Bidentatoside I   | HMGCR   | 0.8    |
| NX | Bidentatoside I   | HSD11B1 | 0.8889 |
| NX | Bidentatoside I   | HSD11B2 | 0.8182 |
| NX | Bidentatoside I   | HSD3B1  | 0.8182 |
| NX | Bidentatoside I   | IL1B    | 0.807  |
| NX | Bidentatoside I   | IL6     | 0.807  |
| NX | Bidentatoside I   | ITGAL   | 0.8    |
| NX | Bidentatoside I   | ITGB2   | 0.8    |
| NX | Bidentatoside I   | LPL     | 0.8889 |
| NX | Bidentatoside I   | NFKB1   | 0.8889 |
| NX | Bidentatoside I   | NFKB2   | 0.8889 |
| NX | Bidentatoside I   | NR3C1   | 0.8571 |
| NX | Bidentatoside I   | PPP1CC  | 0.8246 |
| NX | Bidentatoside I   | SLCO1B3 | 0.9273 |
| NX | Bidentatoside I   | TNF     | 0.8889 |
| NX | Bidentatoside I   | VDR     | 0.8036 |
| NX | Bidentatoside I   | YWHAE   | 0.8621 |
| NX | Bidentatoside Ii  | ANXA1   | 0.8333 |
| NX | Bidentatoside Ii  | ATP1A1  | 0.8772 |
| NX | Bidentatoside Ii  | ATP1A2  | 0.8596 |
| NX | Bidentatoside Ii  | ATP1A3  | 0.8596 |
| NX | Bidentatoside Ii  | CASP3   | 0.8704 |
| NX | Bidentatoside Ii  | GABRB3  | 0.8621 |
| NX | Bidentatoside Ii  | GLRA3   | 0.8621 |

|    |                                   |         |        |
|----|-----------------------------------|---------|--------|
| NX | Bidentatoside Ii                  | HMGCR   | 0.8148 |
| NX | Bidentatoside Ii                  | HSD11B1 | 0.8704 |
| NX | Bidentatoside Ii                  | HSD11B2 | 0.8333 |
| NX | Bidentatoside Ii                  | HSD3B1  | 0.8333 |
| NX | Bidentatoside Ii                  | IL1B    | 0.8214 |
| NX | Bidentatoside Ii                  | IL6     | 0.8214 |
| NX | Bidentatoside Ii                  | ITGAL   | 0.8148 |
| NX | Bidentatoside Ii                  | ITGB2   | 0.8148 |
| NX | Bidentatoside Ii                  | LPL     | 0.8704 |
| NX | Bidentatoside Ii                  | NFKB1   | 0.8704 |
| NX | Bidentatoside Ii                  | NFKB2   | 0.8704 |
| NX | Bidentatoside Ii                  | NR3C1   | 0.8393 |
| NX | Bidentatoside Ii                  | PPP1CC  | 0.807  |
| NX | Bidentatoside Ii                  | SLCO1B3 | 0.9091 |
| NX | Bidentatoside Ii                  | TNF     | 0.8704 |
| NX | Bidentatoside Ii                  | VDR     | 0.8182 |
| NX | Bidentatoside Ii                  | YWHAE   | 0.8772 |
| NX | Chikusetsu Saponin V Methyl Ester | ATP1A1  | 0.8621 |
| NX | Chikusetsu Saponin V Methyl Ester | ATP1A2  | 0.8448 |
| NX | Chikusetsu Saponin V Methyl Ester | ATP1A3  | 0.8448 |
| NX | Chikusetsu Saponin V Methyl Ester | CASP3   | 0.8889 |
| NX | Chikusetsu Saponin V Methyl Ester | GABRB3  | 0.9123 |
| NX | Chikusetsu Saponin V Methyl Ester | GLRA3   | 0.9123 |
| NX | Chikusetsu Saponin V Methyl Ester | HSD11B1 | 0.8889 |
| NX | Chikusetsu Saponin V Methyl Ester | LPL     | 0.8889 |
| NX | Chikusetsu Saponin V Methyl Ester | NFKB1   | 0.8889 |
| NX | Chikusetsu Saponin V Methyl Ester | NFKB2   | 0.8889 |
| NX | Chikusetsu Saponin V Methyl Ester | NR3C1   | 0.8246 |
| NX | Chikusetsu Saponin V Methyl Ester | SLCO1B3 | 0.8929 |
| NX | Chikusetsu Saponin V Methyl Ester | TNF     | 0.8889 |
| NX | Chikusetsu Saponin V Methyl Ester | YWHAE   | 0.8621 |
| NX | Inokosterone,Isoquercitrin        | ANXA1   | 0.8936 |
| NX | Inokosterone,Isoquercitrin        | ANXA3   | 0.8163 |
| NX | Inokosterone,Isoquercitrin        | AR      | 0.8235 |
| NX | Inokosterone,Isoquercitrin        | HDAC2   | 0.8723 |
| NX | Inokosterone,Isoquercitrin        | HSD11B1 | 0.9111 |
| NX | Inokosterone,Isoquercitrin        | HSD11B2 | 0.8936 |
| NX | Inokosterone,Isoquercitrin        | HSD3B1  | 0.8936 |
| NX | Inokosterone,Isoquercitrin        | NCOA1   | 0.9111 |
| NX | Inokosterone,Isoquercitrin        | NOS2    | 0.8431 |
| NX | Inokosterone,Isoquercitrin        | NPPB    | 0.8    |

|    |                            |         |        |
|----|----------------------------|---------|--------|
| NX | Inokosterone,Isoquercitrin | NR0B1   | 0.8431 |
| NX | Inokosterone,Isoquercitrin | NR1I2   | 0.8431 |
| NX | Inokosterone,Isoquercitrin | NR3C1   | 0.9149 |
| NX | Inokosterone,Isoquercitrin | NR3C2   | 0.9111 |
| NX | Inokosterone,Isoquercitrin | PGR     | 0.8367 |
| NX | Inokosterone,Isoquercitrin | PPP1CC  | 0.8077 |
| NX | Inokosterone,Isoquercitrin | VDR     | 0.82   |
| NX | (25R)-Inokosterone         | ANXA1   | 0.8936 |
| NX | (25R)-Inokosterone         | ANXA3   | 0.8163 |
| NX | (25R)-Inokosterone         | AR      | 0.8235 |
| NX | (25R)-Inokosterone         | HDAC2   | 0.8723 |
| NX | (25R)-Inokosterone         | HSD11B1 | 0.9111 |
| NX | (25R)-Inokosterone         | HSD11B2 | 0.8936 |
| NX | (25R)-Inokosterone         | HSD3B1  | 0.8936 |
| NX | (25R)-Inokosterone         | NCOA1   | 0.9111 |
| NX | (25R)-Inokosterone         | NOS2    | 0.8431 |
| NX | (25R)-Inokosterone         | NPPB    | 0.8    |
| NX | (25R)-Inokosterone         | NR0B1   | 0.8431 |
| NX | (25R)-Inokosterone         | NR1I2   | 0.8431 |
| NX | (25R)-Inokosterone         | NR3C1   | 0.9149 |
| NX | (25R)-Inokosterone         | NR3C2   | 0.9111 |
| NX | (25R)-Inokosterone         | PGR     | 0.8367 |
| NX | (25R)-Inokosterone         | PPP1CC  | 0.8077 |
| NX | (25R)-Inokosterone         | VDR     | 0.82   |
| NX | (25S)-Inokosterone         | ANXA1   | 0.8936 |
| NX | (25S)-Inokosterone         | ANXA3   | 0.8163 |
| NX | (25S)-Inokosterone         | AR      | 0.8235 |
| NX | (25S)-Inokosterone         | HDAC2   | 0.8723 |
| NX | (25S)-Inokosterone         | HSD11B1 | 0.9111 |
| NX | (25S)-Inokosterone         | HSD11B2 | 0.8936 |
| NX | (25S)-Inokosterone         | HSD3B1  | 0.8936 |
| NX | (25S)-Inokosterone         | NCOA1   | 0.9111 |
| NX | (25S)-Inokosterone         | NOS2    | 0.8431 |
| NX | (25S)-Inokosterone         | NPPB    | 0.8    |
| NX | (25S)-Inokosterone         | NR0B1   | 0.8431 |
| NX | (25S)-Inokosterone         | NR1I2   | 0.8431 |
| NX | (25S)-Inokosterone         | NR3C1   | 0.9149 |
| NX | (25S)-Inokosterone         | NR3C2   | 0.9111 |
| NX | (25S)-Inokosterone         | PGR     | 0.8367 |
| NX | (25S)-Inokosterone         | PPP1CC  | 0.8077 |
| NX | (25S)-Inokosterone         | VDR     | 0.82   |
| NX | Rubrosterone               | AKR1C1  | 0.8293 |
| NX | Rubrosterone               | AKR1C2  | 0.8293 |
| NX | Rubrosterone               | ANXA1   | 0.8696 |
| NX | Rubrosterone               | AR      | 0.8571 |
| NX | Rubrosterone               | ESR1    | 0.8293 |
| NX | Rubrosterone               | ESR2    | 0.8049 |
| NX | Rubrosterone               | GABRA1  | 0.8049 |
| NX | Rubrosterone               | GABRA2  | 0.8049 |
| NX | Rubrosterone               | GABRA3  | 0.8049 |
| NX | Rubrosterone               | GABRA4  | 0.8049 |
| NX | Rubrosterone               | GABRA5  | 0.8049 |
| NX | Rubrosterone               | GABRA6  | 0.8049 |
| NX | Rubrosterone               | GABRB1  | 0.8049 |
| NX | Rubrosterone               | GABRB2  | 0.8049 |

|    |              |         |        |
|----|--------------|---------|--------|
| NX | Rubrosterone | GABRB3  | 0.8049 |
| NX | Rubrosterone | GABRD   | 0.8049 |
| NX | Rubrosterone | GABRE   | 0.8049 |
| NX | Rubrosterone | GABRG1  | 0.8049 |
| NX | Rubrosterone | GABRG2  | 0.8049 |
| NX | Rubrosterone | GABRG3  | 0.8049 |
| NX | Rubrosterone | GABRP   | 0.8049 |
| NX | Rubrosterone | GABRQ   | 0.8049 |
| NX | Rubrosterone | GRIN1   | 0.8049 |
| NX | Rubrosterone | GRIN2A  | 0.8049 |
| NX | Rubrosterone | GRIN2B  | 0.8049 |
| NX | Rubrosterone | GRIN2C  | 0.8049 |
| NX | Rubrosterone | GRIN2D  | 0.8049 |
| NX | Rubrosterone | GRIN3A  | 0.8049 |
| NX | Rubrosterone | GRIN3B  | 0.8049 |
| NX | Rubrosterone | HDAC2   | 0.8478 |
| NX | Rubrosterone | HSD11B1 | 0.8696 |
| NX | Rubrosterone | HSD11B2 | 0.9286 |
| NX | Rubrosterone | HSD17B1 | 0.8049 |
| NX | Rubrosterone | HSD3B1  | 0.8696 |
| NX | Rubrosterone | IGHG2   | 0.8    |
| NX | Rubrosterone | NCOA1   | 0.8444 |
| NX | Rubrosterone | NCOA2   | 0.8293 |
| NX | Rubrosterone | NFKB1   | 0.8333 |
| NX | Rubrosterone | NFKB2   | 0.8333 |
| NX | Rubrosterone | NPPB    | 0.8571 |
| NX | Rubrosterone | NR1H4   | 0.8182 |
| NX | Rubrosterone | NR1I2   | 0.8049 |
| NX | Rubrosterone | NR1I3   | 0.8049 |
| NX | Rubrosterone | NR3C1   | 0.8696 |
| NX | Rubrosterone | NR3C2   | 0.8444 |
| NX | Rubrosterone | PGR     | 0.8293 |
| NX | Rubrosterone | PPARA   | 0.8049 |
| NX | Rubrosterone | SIGMAR1 | 0.8049 |
| NX | Rubrosterone | SULT2A1 | 0.8049 |
| NX | Rubrosterone | SULT2B1 | 0.8049 |

Table S3. 129 active ingredients and 271 targets were obtained in Tcmosp database

| Herb | Mol ID    | Molecule Name | Related targets name                                                            | Gene   |
|------|-----------|---------------|---------------------------------------------------------------------------------|--------|
| DH   | MOL000471 | aloe-emodin   | Prostaglandin G/H synthase 1                                                    | PTGS1  |
| DH   | MOL000471 | aloe-emodin   | Prostaglandin G/H synthase 2                                                    | PTGS2  |
| DH   | MOL000471 | aloe-emodin   | Heat shock protein HSP 90                                                       | HSP90  |
| DH   | MOL000471 | aloe-emodin   | Phosphatidylinositol-4,5-bisphosphate 3-kinase catalytic subunit, gamma isoform | PIK3CG |
| DH   | MOL000471 | aloe-emodin   | mRNA of PKA Catalytic Subunit C-alpha                                           | PRKACA |
| DH   | MOL000471 | aloe-emodin   | Nuclear receptor coactivator 2                                                  | NCOA2  |
| DH   | MOL000471 | aloe-emodin   | cAMP-dependent protein kinase inhibitor                                         | PKIA   |
| DH   | MOL000471 | aloe-emodin   | Aldose reductase                                                                | AR     |
| DH   | MOL000471 | aloe-emodin   | Ig gamma-1 chain C region                                                       | IGHG1  |
| DH   | MOL000471 | aloe-emodin   | Cyclin-dependent kinase inhibitor 1                                             | CDKN1A |
| DH   | MOL000471 | aloe-emodin   | Eukaryotic translation initiation factor 6                                      | EIF6   |
| DH   | MOL000471 | aloe-emodin   | Apoptosis regulator BAX                                                         | BAX    |
| DH   | MOL000471 | aloe-emodin   | Tumor necrosis factor                                                           | TNF    |
| DH   | MOL000471 | aloe-emodin   | Caspase-3                                                                       | CASP3  |
| DH   | MOL000471 | aloe-emodin   | Cellular tumor antigen p53                                                      | TP53   |
| DH   | MOL000471 | aloe-emodin   | Fatty acid synthase                                                             | FASN   |
| DH   | MOL000471 | aloe-emodin   | Protein kinase C alpha type                                                     | PRKCA  |
| DH   | MOL000471 | aloe-emodin   | Protein kinase C epsilon type                                                   | PRKCE  |
| DH   | MOL000471 | aloe-emodin   | Cell division control protein 2 homolog                                         | CDK2   |
| DH   | MOL000471 | aloe-emodin   | Proliferating cell nuclear antigen                                              | PCNA   |
| DH   | MOL000471 | aloe-emodin   | Myc proto-oncogene protein                                                      | MYC    |
| DH   | MOL000471 | aloe-emodin   | Interleukin-1 beta                                                              | IL1B   |
| DH   | MOL000471 | aloe-emodin   | Protein kinase C delta type                                                     | PRKCD  |
| DH   | MOL000471 | aloe-emodin   | G2/mitotic-specific cyclin-B1                                                   | CCNB1  |
| DH   | MOL002235 | EUPATIN       | Nitric oxide synthase, inducible                                                | NOS2   |
| DH   | MOL002235 | EUPATIN       | Androgen receptor                                                               | AR     |
| DH   | MOL002235 | EUPATIN       | Coagulation factor Xa                                                           | F10    |
| DH   | MOL002235 | EUPATIN       | Prostaglandin G/H synthase 2                                                    | PTGS2  |
| DH   | MOL002235 | EUPATIN       | Coagulation factor VII                                                          | F7     |
| DH   | MOL002235 | EUPATIN       | DNA topoisomerase II                                                            | TOP2   |
| DH   | MOL002235 | EUPATIN       | Estrogen receptor beta                                                          | ESR2   |
| DH   | MOL002235 | EUPATIN       | Dipeptidyl peptidase IV                                                         | DPP4   |
| DH   | MOL002235 | EUPATIN       | Heat shock protein HSP 90                                                       | HSP90  |
| DH   | MOL002235 | EUPATIN       | Trypsin-1                                                                       | TRY1   |
| DH   | MOL002235 | EUPATIN       | Nuclear receptor coactivator 2                                                  | NCOA2  |
| DH   | MOL002235 | EUPATIN       | Calmodulin                                                                      | CALM   |
| DH   | MOL002235 | EUPATIN       | Thrombin                                                                        | F2     |
| DH   | MOL002235 | EUPATIN       | Sodium channel protein type 5 subunit alpha                                     | SCN5A  |
| DH   | MOL002235 | EUPATIN       | Vascular endothelial growth factor receptor 2                                   | KDR    |
| DH   | MOL000096 | (-)-catechin  | Prostaglandin G/H synthase 1                                                    | PTGS1  |
| DH   | MOL000096 | (-)-catechin  | Estrogen receptor                                                               | ER     |
| DH   | MOL000096 | (-)-catechin  | Prostaglandin G/H synthase 2                                                    | PTGS2  |
| DH   | MOL000096 | (-)-catechin  | Heat shock protein HSP 90                                                       | HSP90  |
| DH   | MOL000096 | (-)-catechin  | Beta-lactamase                                                                  | BLAC   |
| DH   | MOL000096 | (-)-catechin  | mRNA of PKA Catalytic Subunit C-alpha                                           | PRKACA |
| DH   | MOL000096 | (-)-catechin  | Nuclear receptor coactivator 2                                                  | NCOA2  |
| DH   | MOL000096 | (-)-catechin  | Calmodulin                                                                      | CALM   |
| DH   | MOL000096 | (-)-catechin  | Fatty acid synthase                                                             | FASN   |
| DH   | MOL000096 | (-)-catechin  | Peroxisome proliferator-activated receptor gamma                                | PPARG  |
| DH   | MOL000096 | (-)-catechin  | Kruppel-like factor 7                                                           | KLF7   |
| DH   | MOL002268 | rhein         | Prostaglandin G/H synthase 1                                                    | PTGS1  |
| DH   | MOL002268 | rhein         | Prostaglandin G/H synthase 2                                                    | PTGS2  |
| DH   | MOL002268 | rhein         | Heat shock protein HSP 90                                                       | HSP90  |
| DH   | MOL002268 | rhein         | Phosphatidylinositol-4,5-bisphosphate 3-kinase catalytic subunit, gamma isoform | PIK3CG |
| DH   | MOL002268 | rhein         | Nuclear receptor coactivator 2                                                  | NCOA2  |
| DH   | MOL002268 | rhein         | Aldose reductase                                                                | AR     |
| DH   | MOL002268 | rhein         | Transcription factor AP-1                                                       | TFAP1  |



|    |           |                                             |                                                                                 |        |
|----|-----------|---------------------------------------------|---------------------------------------------------------------------------------|--------|
| DH | MOL002281 | Toralactone                                 | Nitric oxide synthase, inducible                                                | NOS2   |
| DH | MOL002281 | Toralactone                                 | Prostaglandin G/H synthase 1                                                    | PTGS1  |
| DH | MOL002281 | Toralactone                                 | Estrogen receptor                                                               | ER     |
| DH | MOL002281 | Toralactone                                 | Prostaglandin G/H synthase 2                                                    | PTGS2  |
| DH | MOL002281 | Toralactone                                 | Estrogen receptor beta                                                          | ESR2   |
| DH | MOL002281 | Toralactone                                 | Heat shock protein HSP 90                                                       | HSP90  |
| DH | MOL002281 | Toralactone                                 | Phosphatidylinositol-4,5-bisphosphate 3-kinase catalytic subunit, gamma isoform | PIK3CG |
| DH | MOL002281 | Toralactone                                 | Serine/threonine-protein kinase Chk1                                            | CHEK1  |
| DH | MOL002281 | Toralactone                                 | mRNA of PKA Catalytic Subunit C-alpha                                           | PRKACA |
| DH | MOL002288 | Emodin-1-O-beta-D-glucopyranoside           | DNA topoisomerase II                                                            | TOP2   |
| DH | MOL002280 | Torachryson-8-O-beta-D-(6'-oxayl)-glucoside | DNA topoisomerase II                                                            | TOP2   |
| DH | MOL002259 | Physciondiglucoside                         | DNA topoisomerase II                                                            | TOP2   |
| DH | MOL000358 | beta-sitosterol                             | Progesterone receptor                                                           | PGR    |
| DH | MOL000358 | beta-sitosterol                             | Nuclear receptor coactivator 2                                                  | NCOA2  |
| DH | MOL000358 | beta-sitosterol                             | Prostaglandin G/H synthase 1                                                    | PTGS1  |
| DH | MOL000358 | beta-sitosterol                             | Prostaglandin G/H synthase 2                                                    | PTGS2  |
| DH | MOL000358 | beta-sitosterol                             | Heat shock protein HSP 90                                                       | HSP90  |
| DH | MOL000358 | beta-sitosterol                             | Phosphatidylinositol-4,5-bisphosphate 3-kinase catalytic subunit, gamma isoform | PIK3CG |
| DH | MOL000358 | beta-sitosterol                             | Potassium voltage-gated channel subfamily H member 2                            | KCNH2  |
| DH | MOL000358 | beta-sitosterol                             | mRNA of PKA Catalytic Subunit C-alpha                                           | PRKACA |
| DH | MOL000358 | beta-sitosterol                             | Dopamine D1 receptor                                                            | DRD1   |
| DH | MOL000358 | beta-sitosterol                             | Muscarinic acetylcholine receptor M3                                            | CHRM3  |
| DH | MOL000358 | beta-sitosterol                             | Muscarinic acetylcholine receptor M1                                            | CHRM1  |
| DH | MOL000358 | beta-sitosterol                             | Sodium channel protein type 5 subunit alpha                                     | SCN5A  |
| DH | MOL000358 | beta-sitosterol                             | Gamma-aminobutyric-acid receptor alpha-2 subunit                                | GABRA2 |
| DH | MOL000358 | beta-sitosterol                             | Muscarinic acetylcholine receptor M4                                            | CHRM4  |
| DH | MOL000358 | beta-sitosterol                             | CGMP-inhibited 3',5'-cyclic phosphodiesterase A                                 | PDE3A  |
| DH | MOL000358 | beta-sitosterol                             | 5-hydroxytryptamine 2A receptor                                                 | HTR2A  |
| DH | MOL000358 | beta-sitosterol                             | Gamma-aminobutyric-acid receptor alpha-5 subunit                                | GABRA5 |
| DH | MOL000358 | beta-sitosterol                             | Alpha-1A adrenergic receptor                                                    | ADRA1A |
| DH | MOL000358 | beta-sitosterol                             | Gamma-aminobutyric-acid receptor alpha-3 subunit                                | GABRA3 |
| DH | MOL000358 | beta-sitosterol                             | Muscarinic acetylcholine receptor M2                                            | CHRM2  |
| DH | MOL000358 | beta-sitosterol                             | Alpha-1B adrenergic receptor                                                    | ADRA1B |
| DH | MOL000358 | beta-sitosterol                             | Beta-2 adrenergic receptor                                                      | ADRB2  |
| DH | MOL000358 | beta-sitosterol                             | Neuronal acetylcholine receptor subunit                                         | CHRNA2 |
| DH | MOL000358 | beta-sitosterol                             | Sodium-dependent serotonin transporter                                          | SLC6A4 |
| DH | MOL000358 | beta-sitosterol                             | Mu-type opioid receptor                                                         | OPRM1  |
| DH | MOL000358 | beta-sitosterol                             | Gamma-aminobutyric acid receptor subunit alpha-1                                | GABRA1 |
| DH | MOL000358 | beta-sitosterol                             | Neuronal acetylcholine receptor protein, alpha-7 chain                          | CHRNA7 |
| DH | MOL000358 | beta-sitosterol                             | Apoptosis regulator Bcl-2                                                       | BCL2   |
| DH | MOL000358 | beta-sitosterol                             | Apoptosis regulator BAX                                                         | BAX    |
| DH | MOL000358 | beta-sitosterol                             | Caspase-9                                                                       | CASP9  |
| DH | MOL000358 | beta-sitosterol                             | Transcription factor AP-1                                                       | TFAP1  |
| DH | MOL000358 | beta-sitosterol                             | Caspase-3                                                                       | CASP3  |
| DH | MOL000358 | beta-sitosterol                             | Caspase-8                                                                       | CASP8  |
| DH | MOL000358 | beta-sitosterol                             | Protein kinase C alpha type                                                     | PRKCA  |
| DH | MOL000358 | beta-sitosterol                             | Transforming growth factor beta-1                                               | TGFB1  |
| DH | MOL000358 | beta-sitosterol                             | Serum paraoxonase/arylesterase 1                                                | PON1   |
| DH | MOL000358 | beta-sitosterol                             | Microtubule-associated protein 2                                                | MAP2   |
| DH | MOL002297 | Daucosterol qt                              | Progesterone receptor                                                           | PGR    |
| DH | MOL002297 | Daucosterol qt                              | Nuclear receptor coactivator 2                                                  | NCOA2  |

|    |           |                              |                                                  |        |
|----|-----------|------------------------------|--------------------------------------------------|--------|
| DS | MOL001601 | 1,2,5,6-tetrahydrotanshinone | Prostaglandin G/H synthase 1                     | PTGS1  |
| DS | MOL001601 | 1,2,5,6-tetrahydrotanshinone | Muscarinic acetylcholine receptor M3             | CHRM3  |
| DS | MOL001601 | 1,2,5,6-tetrahydrotanshinone | Muscarinic acetylcholine receptor M1             | CHRM1  |
| DS | MOL001601 | 1,2,5,6-tetrahydrotanshinone | Sodium channel protein type 5 subunit alpha      | SCN5A  |
| DS | MOL001601 | 1,2,5,6-tetrahydrotanshinone | Muscarinic acetylcholine receptor M5             | CHRM5  |
| DS | MOL001601 | 1,2,5,6-tetrahydrotanshinone | Prostaglandin G/H synthase 2                     | PTGS2  |
| DS | MOL001601 | 1,2,5,6-tetrahydrotanshinone | 5-hydroxytryptamine receptor 3A                  | HTR3A  |
| DS | MOL001601 | 1,2,5,6-tetrahydrotanshinone | Carbonic anhydrase 2                             | CA2    |
| DS | MOL001601 | 1,2,5,6-tetrahydrotanshinone | Muscarinic acetylcholine receptor M4             | CHRM4  |
| DS | MOL001601 | 1,2,5,6-tetrahydrotanshinone | Retinoic acid receptor RXR-alpha                 | RXRA   |
| DS | MOL001601 | 1,2,5,6-tetrahydrotanshinone | Delta-type opioid receptor                       | OPRD1  |
| DS | MOL001601 | 1,2,5,6-tetrahydrotanshinone | CGMP-inhibited 3',5'-cyclic phosphodiesterase A  | PDE3A  |
| DS | MOL001601 | 1,2,5,6-tetrahydrotanshinone | Alpha-1A adrenergic receptor                     | ADRA1A |
| DS | MOL001601 | 1,2,5,6-tetrahydrotanshinone | Muscarinic acetylcholine receptor M2             | CHRM2  |
| DS | MOL001601 | 1,2,5,6-tetrahydrotanshinone | Alpha-1B adrenergic receptor                     | ADRA1B |
| DS | MOL001601 | 1,2,5,6-tetrahydrotanshinone | Sodium-dependent dopamine transporter            | SLC6A3 |
| DS | MOL001601 | 1,2,5,6-tetrahydrotanshinone | Beta-2 adrenergic receptor                       | ADRB2  |
| DS | MOL001601 | 1,2,5,6-tetrahydrotanshinone | Alpha-1D adrenergic receptor                     | ADRA1D |
| DS | MOL001601 | 1,2,5,6-tetrahydrotanshinone | DNA topoisomerase II                             | TOP2   |
| DS | MOL001601 | 1,2,5,6-tetrahydrotanshinone | Mu-type opioid receptor                          | OPRM1  |
| DS | MOL001601 | 1,2,5,6-tetrahydrotanshinone | Gamma-aminobutyric acid receptor subunit alpha-1 | GABRA1 |
| DS | MOL001601 | 1,2,5,6-tetrahydrotanshinone | Heat shock protein HSP 90                        | HSP90  |
| DS | MOL001601 | 1,2,5,6-tetrahydrotanshinone | Neuronal acetylcholine receptor subunit alpha-7  | CHRNA7 |
| DS | MOL001601 | 1,2,5,6-tetrahydrotanshinone | Nuclear receptor coactivator 2                   | NCOA2  |
| DS | MOL001601 | 1,2,5,6-tetrahydrotanshinone | Nuclear receptor coactivator 1                   | NCOA1  |
| DS | MOL001601 | 1,2,5,6-tetrahydrotanshinone | Dopamine D1 receptor                             | DRD1   |
| DS | MOL001601 | 1,2,5,6-tetrahydrotanshinone | 5-hydroxytryptamine 2A receptor                  | HTR2A  |
| DS | MOL001601 | 1,2,5,6-tetrahydrotanshinone | Sodium-dependent serotonin transporter           | SLC6A4 |
| DS | MOL001601 | 1,2,5,6-tetrahydrotanshinone | Ig gamma-1 chain C region                        | IGHG1  |
| DS | MOL001659 | Poriferasterol               | Progesterone receptor                            | PGR    |
| DS | MOL001659 | Poriferasterol               | Mineralocorticoid receptor                       | NR3C2  |
| DS | MOL001771 | poriferast-5-en-3beta-ol     | Progesterone receptor                            | PGR    |

|    |           |                          |                                                                                 |        |
|----|-----------|--------------------------|---------------------------------------------------------------------------------|--------|
| DS | MOL001771 | poriferast-5-en-3beta-ol | Nuclear receptor coactivator 2                                                  | NCOA2  |
| DS | MOL001942 | isoimperatorin           | Prostaglandin G/H synthase 2                                                    | PTGS2  |
| DS | MOL002222 | sugiol                   | Muscarinic acetylcholine receptor M3                                            | CHRM3  |
| DS | MOL002222 | sugiol                   | Muscarinic acetylcholine receptor M1                                            | CHRM1  |
| DS | MOL002222 | sugiol                   | Sodium channel protein type 5 subunit alpha                                     | SCN5A  |
| DS | MOL002222 | sugiol                   | Muscarinic acetylcholine receptor M5                                            | CHRM5  |
| DS | MOL002222 | sugiol                   | Prostaglandin G/H synthase 2                                                    | PTGS2  |
| DS | MOL002222 | sugiol                   | Carbonic anhydrase 2                                                            | CA2    |
| DS | MOL002222 | sugiol                   | Muscarinic acetylcholine receptor M4                                            | CHRM4  |
| DS | MOL002222 | sugiol                   | Delta-type opioid receptor                                                      | OPRD1  |
| DS | MOL002222 | sugiol                   | Acetylcholinesterase                                                            | ACHE   |
| DS | MOL002222 | sugiol                   | Alpha-1A adrenergic receptor                                                    | ADRA1A |
| DS | MOL002222 | sugiol                   | Muscarinic acetylcholine receptor M2                                            | CHRM2  |
| DS | MOL002222 | sugiol                   | Alpha-1B adrenergic receptor                                                    | ADRA1B |
| DS | MOL002222 | sugiol                   | Beta-2 adrenergic receptor                                                      | ADRB2  |
| DS | MOL002222 | sugiol                   | Alpha-1D adrenergic receptor                                                    | ADRA1D |
| DS | MOL002222 | sugiol                   | D(2) dopamine receptor                                                          | DRD2   |
| DS | MOL002222 | sugiol                   | Mu-type opioid receptor                                                         | OPRM1  |
| DS | MOL002222 | sugiol                   | Neuronal acetylcholine receptor subunit                                         | CHRNA7 |
| DS | MOL002651 | Dehydrotanshinone II     | Dopamine D1 receptor                                                            | DRD1   |
| DS | MOL002651 | Dehydrotanshinone II     | Muscarinic acetylcholine receptor M3                                            | CHRM3  |
| DS | MOL002651 | Dehydrotanshinone II     | Thrombin                                                                        | F2     |
| DS | MOL002651 | Dehydrotanshinone II     | Muscarinic acetylcholine receptor M1                                            | CHRM1  |
| DS | MOL002651 | Dehydrotanshinone II     | Estrogen receptor                                                               | ER     |
| DS | MOL002651 | Dehydrotanshinone II     | Androgen receptor                                                               | AR     |
| DS | MOL002651 | Dehydrotanshinone II     | Sodium channel protein type 5 subunit alpha                                     | SCN5A  |
| DS | MOL002651 | Dehydrotanshinone II A   | Peroxisome proliferator activated receptor gamma                                | PPARG  |
| DS | MOL002651 | Dehydrotanshinone II     | Muscarinic acetylcholine receptor M5                                            | CHRM5  |
| DS | MOL002651 | Dehydrotanshinone II     | Prostaglandin G/H synthase 2                                                    | PTGS2  |
| DS | MOL002651 | Dehydrotanshinone II     | Muscarinic acetylcholine receptor M4                                            | CHRM4  |
| DS | MOL002651 | Dehydrotanshinone II     | Delta-type opioid receptor                                                      | OPRD1  |
| DS | MOL002651 | Dehydrotanshinone II     | Acetylcholinesterase                                                            | ACHE   |
| DS | MOL002651 | Dehydrotanshinone II     | 5-hydroxytryptamine 2A receptor                                                 | HTR2A  |
| DS | MOL002651 | Dehydrotanshinone II     | Alpha-1A adrenergic receptor                                                    | ADRA1A |
| DS | MOL002651 | Dehydrotanshinone II     | Beta-2 adrenergic receptor                                                      | ADRB2  |
| DS | MOL002651 | Dehydrotanshinone II     | Mu-type opioid receptor                                                         | OPRM1  |
| DS | MOL002651 | Dehydrotanshinone II A   | Gamma-aminobutyric acid receptor subunit alpha-1                                | GABRA1 |
| DS | MOL002651 | Dehydrotanshinone II     | Dipeptidyl peptidase 4                                                          | DPP4   |
| DS | MOL002651 | Dehydrotanshinone II     | Neuronal acetylcholine receptor subunit                                         | CHRNA7 |
| DS | MOL002651 | Dehydrotanshinone II     | Nuclear receptor coactivator 1                                                  | NCOA1  |
| DS | MOL002776 | Baicalin                 | Coagulation factor X                                                            | F10    |
| DS | MOL002776 | Baicalin                 | mRNA of Protein-tyrosine phosphatase, non-receptor type 1                       | PTPN1  |
| DS | MOL000569 | digallate                | Prostaglandin G/H synthase 2                                                    | PTGS2  |
| DS | MOL000569 | digallate                | Heat shock protein HSP 90                                                       | HSP90  |
| DS | MOL000569 | digallate                | Aldose reductase                                                                | AR     |
| DS | MOL000006 | luteolin                 | Prostaglandin G/H synthase 1                                                    | PTGS1  |
| DS | MOL000006 | luteolin                 | Androgen receptor                                                               | AR     |
| DS | MOL000006 | luteolin                 | Prostaglandin G/H synthase 2                                                    | PTGS2  |
| DS | MOL000006 | luteolin                 | Heat shock protein HSP 90                                                       | HSP90  |
| DS | MOL000006 | luteolin                 | Trypsin-1                                                                       | TRY1   |
| DS | MOL000006 | luteolin                 | Nuclear receptor coactivator 2                                                  | NCOA2  |
| DS | MOL000006 | luteolin                 | mRNA of PKA Catalytic Subunit C-alpha                                           | PRKACA |
| DS | MOL000006 | luteolin                 | Dipeptidyl peptidase 4                                                          | DPP4   |
| DS | MOL000006 | luteolin                 | Phosphatidylinositol-4,5-bisphosphate 3-kinase catalytic subunit, gamma isoform | PIK3CG |
| DS | MOL000006 | luteolin                 | Transcription factor p65                                                        | RELA   |
| DS | MOL000006 | luteolin                 | Epidermal growth factor receptor                                                | EGFR   |
| DS | MOL000006 | luteolin                 | RAC-alpha serine/threonine-protein kinase                                       | AKT1   |
| DS | MOL000006 | luteolin                 | Vascular endothelial growth factor A                                            | VEGFA  |

|    |           |                                                                     |                                                                   |        |
|----|-----------|---------------------------------------------------------------------|-------------------------------------------------------------------|--------|
| DS | MOL000006 | luteolin                                                            | G1/S-specific cyclin-D1                                           | CCND1  |
| DS | MOL000006 | luteolin                                                            | Bcl-2-like protein 1                                              | BCL2L1 |
| DS | MOL000006 | luteolin                                                            | Cyclin-dependent kinase inhibitor 1                               | CDKN1A |
| DS | MOL000006 | luteolin                                                            | Caspase-9                                                         | CASP9  |
| DS | MOL000006 | luteolin                                                            | 72 kDa type IV collagenase                                        | MMP2   |
| DS | MOL000006 | luteolin                                                            | Matrix metalloproteinase-9                                        | MMP9   |
| DS | MOL000006 | luteolin                                                            | Mitogen-activated protein kinase 1                                | MAPK1  |
| DS | MOL000006 | luteolin                                                            | Interleukin-10                                                    | IL10   |
| DS | MOL000006 | luteolin                                                            | Retinoblastoma-associated protein                                 | RB1    |
| DS | MOL000006 | luteolin                                                            | Cell division protein kinase 4                                    | CDK4   |
| DS | MOL000006 | luteolin                                                            | Tumor necrosis factor                                             | TNF    |
| DS | MOL000006 | luteolin                                                            | Transcription factor AP-1                                         | TFAP1  |
| DS | MOL000006 | luteolin                                                            | Interleukin-6                                                     | IL6    |
| DS | MOL000006 | luteolin                                                            | Caspase-3                                                         | CASP3  |
| DS | MOL000006 | luteolin                                                            | Cellular tumor antigen p53                                        | TP53   |
| DS | MOL000006 | luteolin                                                            | NF-kappa-B inhibitor alpha                                        | NFKBIA |
| DS | MOL000006 | luteolin                                                            | Xanthine dehydrogenase/oxidase                                    | XDH    |
| DS | MOL000006 | luteolin                                                            | DNA topoisomerase 1                                               | TOP1   |
| DS | MOL000006 | luteolin                                                            | E3 ubiquitin-protein ligase Mdm2                                  | MDM2   |
| DS | MOL000006 | luteolin                                                            | Amyloid beta A4 protein                                           | ABPA4  |
| DS | MOL000006 | luteolin                                                            | Interstitial collagenase                                          | MMP1   |
| DS | MOL000006 | luteolin                                                            | Proliferating cell nuclear antigen                                | PCNA   |
| DS | MOL000006 | luteolin                                                            | Receptor tyrosine-protein kinase erbB-2                           | ERBB2  |
| DS | MOL000006 | luteolin                                                            | Peroxisome proliferator-activated receptor gamma                  | PPARG  |
| DS | MOL000006 | luteolin                                                            | Heme oxygenase 1                                                  | HMOX1  |
| DS | MOL000006 | luteolin                                                            | Caspase-7                                                         | CASP7  |
| DS | MOL000006 | luteolin                                                            | Intercellular adhesion molecule 1                                 | ICAM1  |
| DS | MOL000006 | luteolin                                                            | Induced myeloid leukemia cell differentiation protein Mcl-1       | MCL1   |
| DS | MOL000006 | luteolin                                                            | Baculoviral IAP repeat-containing protein 5                       | BIRC5  |
| DS | MOL000006 | luteolin                                                            | Interleukin-2                                                     | IL2    |
| DS | MOL000006 | luteolin                                                            | G2/mitotic-specific cyclin-B1                                     | CCNB1  |
| DS | MOL000006 | luteolin                                                            | Tyrosinase                                                        | TYR    |
| DS | MOL000006 | luteolin                                                            | Interferon gamma                                                  | IFNG   |
| DS | MOL000006 | luteolin                                                            | Interleukin-4                                                     | IL4    |
| DS | MOL000006 | luteolin                                                            | DNA topoisomerase 2-alpha                                         | TOP2A  |
| DS | MOL000006 | luteolin                                                            | Glutathione S-transferase P                                       | GSTP1  |
| DS | MOL000006 | luteolin                                                            | Baculoviral IAP repeat-containing protein 4                       | BIRC4  |
| DS | MOL000006 | luteolin                                                            | Solute carrier family 2, facilitated glucose transporter member 4 | SLC2A4 |
| DS | MOL000006 | luteolin                                                            | Insulin receptor                                                  | INSR   |
| DS | MOL000006 | luteolin                                                            | CD40 ligand                                                       | CD40LG |
| DS | MOL000006 | luteolin                                                            | Prostaglandin E synthase                                          | PTGES  |
| DS | MOL000006 | luteolin                                                            | Kinetochores protein Nuf2                                         | NUF2   |
| DS | MOL000006 | luteolin                                                            | Adenylate cyclase type 2                                          | ADCY2  |
| DS | MOL000006 | luteolin                                                            | Hepatocyte growth factor receptor                                 | MET    |
| DS | MOL007036 | 5,6-dihydroxy-7-isopropyl-1,1-dimethyl-2,3-dihydrophenanthren-4-one | Prostaglandin G/H synthase 1                                      | PTGS1  |
| DS | MOL007036 | 5,6-dihydroxy-7-isopropyl-1,1-dimethyl-2,3-dihydrophenanthren-4-one | Muscarinic acetylcholine receptor M3                              | CHRM3  |
| DS | MOL007036 | 5,6-dihydroxy-7-isopropyl-1,1-dimethyl-2,3-dihydrophenanthren-4-one | Muscarinic acetylcholine receptor M1                              | CHRM1  |

|    |           |                                                                 |                                             |        |
|----|-----------|-----------------------------------------------------------------|---------------------------------------------|--------|
| DS | MOL007036 | 5,6-dihydroxy-7-isopropyl-1,1-dimethyl-2,3-dihydrophenanthren-4 | Sodium channel protein type 5 subunit alpha | SCN5A  |
| DS | MOL007036 | 5,6-dihydroxy-7-isopropyl-1,1-dimethyl-2,3-dihydrophenanthren-4 | Prostaglandin G/H synthase 2                | PTGS2  |
| DS | MOL007036 | 5,6-dihydroxy-7-isopropyl-1,1-dimethyl-2,3-dihydrophenanthren-4 | Carbonic anhydrase 2                        | CA2    |
| DS | MOL007036 | 5,6-dihydroxy-7-isopropyl-1,1-dimethyl-2,3-dihydrophenanthren-4 | Retinoic acid receptor RXR-alpha            | RXRA   |
| DS | MOL007036 | 5,6-dihydroxy-7-isopropyl-1,1-dimethyl-2,3-dihydrophenanthren-4 | Acetylcholinesterase                        | ACHE   |
| DS | MOL007036 | 5,6-dihydroxy-7-isopropyl-1,1-dimethyl-2,3-dihydrophenanthren-4 | Alpha-1A adrenergic receptor                | ADRA1A |
| DS | MOL007036 | 5,6-dihydroxy-7-isopropyl-1,1-dimethyl-2,3-dihydrophenanthren-4 | Alpha-1B adrenergic receptor                | ADRA1B |
| DS | MOL007036 | 5,6-dihydroxy-7-isopropyl-1,1-dimethyl-2,3-dihydrophenanthren-4 | Beta-2 adrenergic receptor                  | ADRB2  |
| DS | MOL007036 | 5,6-dihydroxy-7-isopropyl-1,1-dimethyl-2,3-dihydrophenanthren-4 | DNA topoisomerase II                        | TOP2   |
| DS | MOL007036 | 5,6-dihydroxy-7-isopropyl-1,1-dimethyl-2,3-dihydrophenanthren-4 | Mu-type opioid receptor                     | OPRM1  |
| DS | MOL007036 | 5,6-dihydroxy-7-isopropyl-1,1-dimethyl-2,3-dihydrophenanthren-4 | Ig gamma-1 chain C region                   | IGHG1  |
| DS | MOL007036 | 5,6-dihydroxy-7-isopropyl-1,1-dimethyl-2,3-dihydrophenanthren-4 | Nuclear receptor coactivator 2              | NCOA2  |

|    |           |                                                                      |                                                  |        |
|----|-----------|----------------------------------------------------------------------|--------------------------------------------------|--------|
| DS | MOL007036 | 5,6-dihydroxy-7-isopropyl-1,1-dimethyl-2,3-dihydrophenanthrene-4-one | Nuclear receptor coactivator 1                   | NCOA1  |
| DS | MOL007036 | 5,6-dihydroxy-7-isopropyl-1,1-dimethyl-2,3-dihydrophenanthrene-4-one | Calmodulin                                       | CALM   |
| DS | MOL007041 | 2-isopropyl-8-methylphenanthrene-3,4-dione                           | Prostaglandin G/H synthase 1                     | PTGS1  |
| DS | MOL007041 | 2-isopropyl-8-methylphenanthrene-3,4-dione                           | Dopamine D1 receptor                             | DRD1   |
| DS | MOL007041 | 2-isopropyl-8-methylphenanthrene-3,4-dione                           | Muscarinic acetylcholine receptor M3             | CHRM3  |
| DS | MOL007041 | 2-isopropyl-8-methylphenanthrene-3,4-dione                           | Muscarinic acetylcholine receptor M1             | CHRM1  |
| DS | MOL007041 | 2-isopropyl-8-methylphenanthrene-3,4-dione                           | Estrogen receptor                                | ER     |
| DS | MOL007041 | 2-isopropyl-8-methylphenanthrene-3,4-dione                           | Androgen receptor                                | AR     |
| DS | MOL007041 | 2-isopropyl-8-methylphenanthrene-3,4-dione                           | Sodium channel protein type 5 subunit alpha      | SCN5A  |
| DS | MOL007041 | 2-isopropyl-8-methylphenanthrene-3,4-dione                           | Peroxisome proliferator activated receptor gamma | PPARG  |
| DS | MOL007041 | 2-isopropyl-8-methylphenanthrene-3,4-dione                           | Muscarinic acetylcholine receptor M5             | CHRM5  |
| DS | MOL007041 | 2-isopropyl-8-methylphenanthrene-3,4-dione                           | Prostaglandin G/H synthase 2                     | PTGS2  |
| DS | MOL007041 | 2-isopropyl-8-methylphenanthrene-3,4-dione                           | Nitric oxide synthase, endothelial               | NOS3   |
| DS | MOL007041 | 2-isopropyl-8-methylphenanthrene-3,4-dione                           | 5-hydroxytryptamine receptor 3A                  | HTR3A  |
| DS | MOL007041 | 2-isopropyl-8-methylphenanthrene-3,4-dione                           | Muscarinic acetylcholine receptor M4             | CHRM4  |
| DS | MOL007041 | 2-isopropyl-8-methylphenanthrene-3,4-dione                           | Retinoic acid receptor RXR-alpha                 | RXRA   |
| DS | MOL007041 | 2-isopropyl-8-methylphenanthrene-3,4-dione                           | 5-hydroxytryptamine 2A receptor                  | HTR2A  |
| DS | MOL007041 | 2-isopropyl-8-methylphenanthrene-3,4-dione                           | Alpha-1A adrenergic receptor                     | ADRA1A |
| DS | MOL007041 | 2-isopropyl-8-methylphenanthrene-3,4-dione                           | Muscarinic acetylcholine receptor M2             | CHRM2  |

|    |           |                                            |                                                                                 |        |
|----|-----------|--------------------------------------------|---------------------------------------------------------------------------------|--------|
| DS | MOL007041 | 2-isopropyl-8-methylphenanthrene-3,4-dione | Alpha-1B adrenergic receptor                                                    | ADRA1B |
| DS | MOL007041 | 2-isopropyl-8-methylphenanthrene-3,4-dione | Sodium-dependent dopamine transporter                                           | SLC6A3 |
| DS | MOL007041 | 2-isopropyl-8-methylphenanthrene-3,4-dione | Beta-2 adrenergic receptor                                                      | ADRB2  |
| DS | MOL007041 | 2-isopropyl-8-methylphenanthrene-3,4-dione | Alpha-1D adrenergic receptor                                                    | ADRA1D |
| DS | MOL007041 | 2-isopropyl-8-methylphenanthrene-3,4-dione | Sodium-dependent serotonin transporter                                          | SLC6A4 |
| DS | MOL007041 | 2-isopropyl-8-methylphenanthrene-3,4-dione | Mu-type opioid receptor                                                         | OPRM1  |
| DS | MOL007041 | 2-isopropyl-8-methylphenanthrene-3,4-dione | Gamma-aminobutyric acid receptor subunit alpha-1                                | GABRA1 |
| DS | MOL007041 | 2-isopropyl-8-methylphenanthrene-3,4-dione | Cell division protein kinase 2                                                  | CDK2   |
| DS | MOL007041 | 2-isopropyl-8-methylphenanthrene-3,4-dione | Phosphatidylinositol-4,5-bisphosphate 3-kinase catalytic subunit, gamma isoform | PIK3CG |
| DS | MOL007041 | 2-isopropyl-8-methylphenanthrene-3,4-dione | Neuronal acetylcholine receptor subunit alpha-7                                 | CHRNA7 |
| DS | MOL007041 | 2-isopropyl-8-methylphenanthrene-3,4-dione | mRNA of PKA Catalytic Subunit C-alpha                                           | PRKACA |
| DS | MOL007041 | 2-isopropyl-8-methylphenanthrene-3,4-dione | Ig gamma-1 chain C region                                                       | IGHG1  |
| DS | MOL007041 | 2-isopropyl-8-methylphenanthrene-3,4-dione | Proto-oncogene serine/threonine-protein kinase Pim-1                            | PIM1   |
| DS | MOL007041 | 2-isopropyl-8-methylphenanthrene-3,4-dione | Cyclin-A2                                                                       | CCNA2  |
| DS | MOL007041 | 2-isopropyl-8-methylphenanthrene-3,4-dione | Nuclear receptor coactivator 2                                                  | NCOA2  |
| DS | MOL007041 | 2-isopropyl-8-methylphenanthrene-3,4-dione | Calmodulin                                                                      | CALM   |
| DS | MOL007045 | 3 $\alpha$ -hydroxytanshinone II a         | Thrombin                                                                        | F2     |
| DS | MOL007045 | 3 $\alpha$ -hydroxytanshinone II a         | Muscarinic acetylcholine receptor M1                                            | CHRM1  |
| DS | MOL007045 | 3 $\alpha$ -hydroxytanshinone II a         | Sodium channel protein type 5 subunit alpha                                     | SCN5A  |
| DS | MOL007045 | 3 $\alpha$ -hydroxytanshinone II a         | Muscarinic acetylcholine receptor M5                                            | CHRM5  |
| DS | MOL007045 | 3 $\alpha$ -hydroxytanshinone II a         | Prostaglandin G/H synthase 2                                                    | PTGS2  |
| DS | MOL007045 | 3 $\alpha$ -hydroxytanshinone II a         | Delta-type opioid receptor                                                      | OPRD1  |
| DS | MOL007045 | 3 $\alpha$ -hydroxytanshinone II a         | Acetylcholinesterase                                                            | ACHE   |

|    |           |                                                                                  |                                                               |        |
|----|-----------|----------------------------------------------------------------------------------|---------------------------------------------------------------|--------|
| DS | MOL007045 | 3 $\alpha$ -hydroxytanshinone<br>II a                                            | Beta-2 adrenergic receptor                                    | ADRB2  |
| DS | MOL007045 | 3 $\alpha$ -hydroxytanshinone<br>II a                                            | Mu-type opioid receptor                                       | OPRM1  |
| DS | MOL007045 | 3 $\alpha$ -hydroxytanshinone<br>II a                                            | Dipeptidyl peptidase 4                                        | DPP4   |
| DS | MOL007045 | 3 $\alpha$ -hydroxytanshinone<br>II a                                            | Neuronal acetylcholine receptor subunit<br>alpha-7            | CHRNA7 |
| DS | MOL007045 | 3 $\alpha$ -hydroxytanshinone<br>II a                                            | Trypsin-1                                                     | TRY1   |
| DS | MOL007045 | 3 $\alpha$ -hydroxytanshinone<br>II a                                            | Nuclear receptor coactivator 1                                | NCOA1  |
| DS | MOL007048 | (E)-3-[2-(3,4-<br>dihydroxyphenyl)-7-<br>hydroxy-benzofuran-<br>4-yl]acetic acid | Prostaglandin G/H synthase 2                                  | PTGS2  |
| DS | MOL007048 | (E)-3-[2-(3,4-<br>dihydroxyphenyl)-7-<br>hydroxy-benzofuran-<br>4-yl]acetic acid | mRNA of Protein-tyrosine phosphatase, non-<br>receptor type 1 | PTPN1  |
| DS | MOL007048 | (E)-3-[2-(3,4-<br>dihydroxyphenyl)-7-<br>hydroxy-benzofuran-<br>4-yl]acetic acid | Heat shock protein HSP 90                                     | HSP90  |
| DS | MOL007049 | 4-methylenemiltirone                                                             | Prostaglandin G/H synthase 1                                  | PTGS1  |
| DS | MOL007049 | 4-methylenemiltirone                                                             | Dopamine D1 receptor                                          | DRD1   |
| DS | MOL007049 | 4-methylenemiltirone                                                             | Muscarinic acetylcholine receptor M3                          | CHRM3  |
| DS | MOL007049 | 4-methylenemiltirone                                                             | Muscarinic acetylcholine receptor M1                          | CHRM1  |
| DS | MOL007049 | 4-methylenemiltirone                                                             | Estrogen receptor                                             | ER     |
| DS | MOL007049 | 4-methylenemiltirone                                                             | Androgen receptor                                             | AR     |
| DS | MOL007049 | 4-methylenemiltirone                                                             | Sodium channel protein type 5 subunit alpha                   | SCN5A  |
| DS | MOL007049 | 4-methylenemiltirone                                                             | Peroxisome proliferator activated receptor<br>gamma           | PPARG  |
| DS | MOL007049 | 4-methylenemiltirone                                                             | Muscarinic acetylcholine receptor M5                          | CHRM5  |
| DS | MOL007049 | 4-methylenemiltirone                                                             | Prostaglandin G/H synthase 2                                  | PTGS2  |
| DS | MOL007049 | 4-methylenemiltirone                                                             | Nitric oxide synthase, endothelial                            | NOS3   |
| DS | MOL007049 | 4-methylenemiltirone                                                             | Alpha-2A adrenergic receptor                                  | ADRA2A |
| DS | MOL007049 | 4-methylenemiltirone                                                             | Carbonic anhydrase 2                                          | CA2    |
| DS | MOL007049 | 4-methylenemiltirone                                                             | Alpha-2C adrenergic receptor                                  | ADRA2C |
| DS | MOL007049 | 4-methylenemiltirone                                                             | Muscarinic acetylcholine receptor M4                          | CHRM4  |
| DS | MOL007049 | 4-methylenemiltirone                                                             | Retinoic acid receptor RXR-alpha                              | RXRA   |
| DS | MOL007049 | 4-methylenemiltirone                                                             | Delta-type opioid receptor                                    | OPRD1  |
| DS | MOL007049 | 4-methylenemiltirone                                                             | 5-hydroxytryptamine 2A receptor                               | HTR2A  |
| DS | MOL007049 | 4-methylenemiltirone                                                             | Alpha-1A adrenergic receptor                                  | ADRA1A |
| DS | MOL007049 | 4-methylenemiltirone                                                             | Muscarinic acetylcholine receptor M2                          | CHRM2  |
| DS | MOL007049 | 4-methylenemiltirone                                                             | Alpha-1B adrenergic receptor                                  | ADRA1B |
| DS | MOL007049 | 4-methylenemiltirone                                                             | Sodium-dependent dopamine transporter                         | SLC6A3 |
| DS | MOL007049 | 4-methylenemiltirone                                                             | Beta-2 adrenergic receptor                                    | ADRB2  |
| DS | MOL007049 | 4-methylenemiltirone                                                             | Alpha-1D adrenergic receptor                                  | ADRA1D |
| DS | MOL007049 | 4-methylenemiltirone                                                             | DNA topoisomerase II                                          | TOP2   |
| DS | MOL007049 | 4-methylenemiltirone                                                             | Sodium-dependent serotonin transporter                        | SLC6A4 |
| DS | MOL007049 | 4-methylenemiltirone                                                             | D(2) dopamine receptor                                        | DRD2   |
| DS | MOL007049 | 4-methylenemiltirone                                                             | Mu-type opioid receptor                                       | OPRM1  |
| DS | MOL007049 | 4-methylenemiltirone                                                             | Gamma-aminobutyric acid receptor subunit<br>alpha-1           | GABRA1 |
| DS | MOL007049 | 4-methylenemiltirone                                                             | Neuronal acetylcholine receptor subunit                       | CHRNA7 |
| DS | MOL007049 | 4-methylenemiltirone                                                             | mRNA of PKA Catalytic Subunit C-alpha                         | PRKACA |
| DS | MOL007049 | 4-methylenemiltirone                                                             | Nuclear receptor coactivator 2                                | NCOA2  |
| DS | MOL007049 | 4-methylenemiltirone                                                             | Nuclear receptor coactivator 1                                | NCOA1  |



|    |           |                                                                                    |                                                  |        |
|----|-----------|------------------------------------------------------------------------------------|--------------------------------------------------|--------|
| DS | MOL007050 | 2-(4-hydroxy-3-methoxyphenyl)-5-(3-hydroxypropyl)-7-methoxy-3-benzofurancarboxalde | Nitric oxide synthase, inducible                 | NOS2   |
| DS | MOL007050 | 2-(4-hydroxy-3-methoxyphenyl)-5-(3-hydroxypropyl)-7-methoxy-3-benzofurancarboxalde | Thrombin                                         | F2     |
| DS | MOL007050 | 2-(4-hydroxy-3-methoxyphenyl)-5-(3-hydroxypropyl)-7-methoxy-3-benzofurancarboxalde | Estrogen receptor                                | ER     |
| DS | MOL007050 | 2-(4-hydroxy-3-methoxyphenyl)-5-(3-hydroxypropyl)-7-methoxy-3-benzofurancarboxalde | Androgen receptor                                | AR     |
| DS | MOL007050 | 2-(4-hydroxy-3-methoxyphenyl)-5-(3-hydroxypropyl)-7-methoxy-3-benzofurancarboxalde | Peroxisome proliferator activated receptor gamma | PPARG  |
| DS | MOL007050 | 2-(4-hydroxy-3-methoxyphenyl)-5-(3-hydroxypropyl)-7-methoxy-3-benzofurancarboxalde | Estrogen receptor beta                           | ESR2   |
| DS | MOL007050 | 2-(4-hydroxy-3-methoxyphenyl)-5-(3-hydroxypropyl)-7-methoxy-3-benzofurancarboxalde | Mitogen-activated protein kinase 14              | MAPK14 |
| DS | MOL007050 | 2-(4-hydroxy-3-methoxyphenyl)-5-(3-hydroxypropyl)-7-methoxy-3-benzofurancarboxalde | Glycogen synthase kinase-3 beta                  | GSK3B  |
| DS | MOL007050 | 2-(4-hydroxy-3-methoxyphenyl)-5-(3-hydroxypropyl)-7-methoxy-3-benzofurancarboxalde | Heat shock protein HSP 90                        | HSP90  |
| DS | MOL007050 | 2-(4-hydroxy-3-methoxyphenyl)-5-(3-hydroxypropyl)-7-methoxy-3-benzofurancarboxalde | Cell division protein kinase 2                   | CDK2   |

|    |           |                                                                                        |                                                                                 |        |
|----|-----------|----------------------------------------------------------------------------------------|---------------------------------------------------------------------------------|--------|
| DS | MOL007050 | 2-(4-hydroxy-3-methoxyphenyl)-5-(3-hydroxypropyl)-7-methoxy-3-benzofurancarboxaldehyde | Proto-oncogene serine/threonine-protein kinase Pim-1                            | PIM1   |
| DS | MOL007050 | 2-(4-hydroxy-3-methoxyphenyl)-5-(3-hydroxypropyl)-7-methoxy-3-benzofurancarboxaldehyde | Cyclin-A2                                                                       | CCNA2  |
| DS | MOL007058 | formyltanshinone                                                                       | Thrombin                                                                        | F2     |
| DS | MOL007058 | formyltanshinone                                                                       | Androgen receptor                                                               | AR     |
| DS | MOL007058 | formyltanshinone                                                                       | Prostaglandin G/H synthase 2                                                    | PTGS2  |
| DS | MOL007058 | formyltanshinone                                                                       | Retinoic acid receptor RXR-alpha                                                | RXRA   |
| DS | MOL007058 | formyltanshinone                                                                       | Dipeptidyl peptidase 4                                                          | DPP4   |
| DS | MOL007058 | formyltanshinone                                                                       | Phosphatidylinositol-4,5-bisphosphate 3-kinase catalytic subunit, gamma isoform | PIK3CG |
| DS | MOL007058 | formyltanshinone                                                                       | mRNA of PKA Catalytic Subunit C-alpha                                           | PRKACA |
| DS | MOL007058 | formyltanshinone                                                                       | Nuclear receptor coactivator 1                                                  | NCOA1  |
| DS | MOL007059 | 3-beta-Hydroxymethylenetanshinone                                                      | Dopamine D1 receptor                                                            | DRD1   |
| DS | MOL007059 | 3-beta-Hydroxymethylenetanshinone                                                      | Thrombin                                                                        | F2     |
| DS | MOL007059 | 3-beta-Hydroxymethylenetanshinone                                                      | Muscarinic acetylcholine receptor M1                                            | CHRM1  |
| DS | MOL007059 | 3-beta-Hydroxymethylenetanshinone                                                      | Prostaglandin G/H synthase 2                                                    | PTGS2  |
| DS | MOL007059 | 3-beta-Hydroxymethylenetanshinone                                                      | Carbonic anhydrase 2                                                            | CA2    |
| DS | MOL007059 | 3-beta-Hydroxymethylenetanshinone                                                      | Retinoic acid receptor RXR-alpha                                                | RXRA   |
| DS | MOL007059 | 3-beta-Hydroxymethylenetanshinone                                                      | Delta-type opioid receptor                                                      | OPRD1  |
| DS | MOL007059 | 3-beta-Hydroxymethylenetanshinone                                                      | Acetylcholinesterase                                                            | ACHE   |
| DS | MOL007059 | 3-beta-Hydroxymethylenetanshinone                                                      | Alpha-1A adrenergic receptor                                                    | ADRA1A |
| DS | MOL007059 | 3-beta-Hydroxymethylenetanshinone                                                      | Beta-2 adrenergic receptor                                                      | ADRB2  |
| DS | MOL007059 | 3-beta-Hydroxymethylenetanshinone                                                      | Mu-type opioid receptor                                                         | OPRM1  |
| DS | MOL007059 | 3-beta-Hydroxymethylenetanshinone                                                      | Dipeptidyl peptidase 4                                                          | DPP4   |
| DS | MOL007059 | 3-beta-Hydroxymethylenetanshinone                                                      | Heat shock protein HSP 90                                                       | HSP90  |
| DS | MOL007059 | 3-beta-Hydroxymethylenetanshinone                                                      | Neuronal acetylcholine receptor subunit alpha-7                                 | CHRNA7 |

|    |           |                                        |                                                  |        |
|----|-----------|----------------------------------------|--------------------------------------------------|--------|
| DS | MOL007059 | 3-beta-Hydroxymethyllenetasnshiquinone | Ig gamma-1 chain C region                        | IGHG1  |
| DS | MOL007059 | 3-beta-Hydroxymethyllenetasnshiquinone | Trypsin-1                                        | TRY1   |
| DS | MOL007059 | 3-beta-Hydroxymethyllenetasnshiquinone | Nuclear receptor coactivator 1                   | NCOA1  |
| DS | MOL007061 | Methylenetanshinquinone                | Dopamine D1 receptor                             | DRD1   |
| DS | MOL007061 | Methylenetanshinquinone                | Muscarinic acetylcholine receptor M3             | CHRM3  |
| DS | MOL007061 | Methylenetanshinquinone                | Thrombin                                         | F2     |
| DS | MOL007061 | Methylenetanshinquinone                | Muscarinic acetylcholine receptor M1             | CHRM1  |
| DS | MOL007061 | Methylenetanshinquinone                | Sodium channel protein type 5 subunit alpha      | SCN5A  |
| DS | MOL007061 | Methylenetanshinquinone                | Muscarinic acetylcholine receptor M5             | CHRM5  |
| DS | MOL007061 | Methylenetanshinquinone                | Prostaglandin G/H synthase 2                     | PTGS2  |
| DS | MOL007061 | Methylenetanshinquinone                | Carbonic anhydrase 2                             | CA2    |
| DS | MOL007061 | Methylenetanshinquinone                | Retinoic acid receptor RXR-alpha                 | RXRA   |
| DS | MOL007061 | Methylenetanshinquinone                | Delta-type opioid receptor                       | OPRD1  |
| DS | MOL007061 | Methylenetanshinquinone                | Acetylcholinesterase                             | ACHE   |
| DS | MOL007061 | Methylenetanshinquinone                | 5-hydroxytryptamine 2A receptor                  | HTR2A  |
| DS | MOL007061 | Methylenetanshinquinone                | Alpha-1A adrenergic receptor                     | ADRA1A |
| DS | MOL007061 | Methylenetanshinquinone                | Muscarinic acetylcholine receptor M2             | CHRM2  |
| DS | MOL007061 | Methylenetanshinquinone                | Beta-2 adrenergic receptor                       | ADRB2  |
| DS | MOL007061 | Methylenetanshinquinone                | Sodium-dependent serotonin transporter           | SLC6A4 |
| DS | MOL007061 | Methylenetanshinquinone                | Mu-type opioid receptor                          | OPRM1  |
| DS | MOL007061 | Methylenetanshinquinone                | Gamma-aminobutyric acid receptor subunit alpha-1 | GABRA1 |
| DS | MOL007061 | Methylenetanshinquinone                | Dipeptidyl peptidase 4                           | DPP4   |
| DS | MOL007061 | Methylenetanshinquinone                | Heat shock protein HSP 90                        | HSP90  |
| DS | MOL007061 | Methylenetanshinquinone                | Neuronal acetylcholine receptor subunit alpha-7  | CHRNA7 |
| DS | MOL007061 | Methylenetanshinquinone                | Ig gamma-1 chain C region                        | IGHG1  |
| DS | MOL007061 | Methylenetanshinquinone                | Trypsin-1                                        | TRY1   |
| DS | MOL007061 | Methylenetanshinquinone                | Nuclear receptor coactivator 1                   | NCOA1  |
| DS | MOL007063 | przewalskin a                          | Mineralocorticoid receptor                       | NR3C2  |
| DS | MOL007063 | przewalskin a                          | Glucocorticoid receptor                          | NR3C1  |
| DS | MOL007064 | przewalskin b                          | Prostaglandin G/H synthase 2                     | PTGS2  |
| DS | MOL007064 | przewalskin b                          | Progesterone receptor                            | PGR    |
| DS | MOL007064 | przewalskin b                          | Mineralocorticoid receptor                       | NR3C2  |
| DS | MOL007064 | przewalskin b                          | Glucocorticoid receptor                          | NR3C1  |

|    |           |                                                                                   |                                                                                 |        |
|----|-----------|-----------------------------------------------------------------------------------|---------------------------------------------------------------------------------|--------|
| DS | MOL007064 | przewalskin b                                                                     | Nuclear receptor coactivator 2                                                  | NCOA2  |
| DS | MOL007064 | przewalskin b                                                                     | Nuclear receptor coactivator 1                                                  | NCOA1  |
| DS | MOL007068 | Przewaquinone B                                                                   | Thrombin                                                                        | F2     |
| DS | MOL007068 | Przewaquinone B                                                                   | Prostaglandin G/H synthase 2                                                    | PTGS2  |
| DS | MOL007068 | Przewaquinone B                                                                   | Retinoic acid receptor RXR-alpha                                                | RXRA   |
| DS | MOL007068 | Przewaquinone B                                                                   | Dipeptidyl peptidase 4                                                          | DPP4   |
| DS | MOL007068 | Przewaquinone B                                                                   | Heat shock protein HSP 90                                                       | HSP90  |
| DS | MOL007068 | Przewaquinone B                                                                   | Phosphatidylinositol-4,5-bisphosphate 3-kinase catalytic subunit, gamma isoform | PIK3CG |
| DS | MOL007068 | Przewaquinone B                                                                   | Ig gamma-1 chain C region                                                       | IGHG1  |
| DS | MOL007068 | Przewaquinone B                                                                   | Trypsin-1                                                                       | TRY1   |
| DS | MOL007068 | Przewaquinone B                                                                   | Nuclear receptor coactivator 1                                                  | NCOA1  |
| DS | MOL007069 | przewaquinone c                                                                   | Prostaglandin G/H synthase 1                                                    | PTGS1  |
| DS | MOL007069 | przewaquinone c                                                                   | Dopamine D1 receptor                                                            | DRD1   |
| DS | MOL007069 | przewaquinone c                                                                   | Muscarinic acetylcholine receptor M3                                            | CHRM3  |
| DS | MOL007069 | przewaquinone c                                                                   | Thrombin                                                                        | F2     |
| DS | MOL007069 | przewaquinone c                                                                   | Muscarinic acetylcholine receptor M1                                            | CHRM1  |
| DS | MOL007069 | przewaquinone c                                                                   | Sodium channel protein type 5 subunit alpha                                     | SCN5A  |
| DS | MOL007069 | przewaquinone c                                                                   | Muscarinic acetylcholine receptor M5                                            | CHRM5  |
| DS | MOL007069 | przewaquinone c                                                                   | Prostaglandin G/H synthase 2                                                    | PTGS2  |
| DS | MOL007069 | przewaquinone c                                                                   | Carbonic anhydrase 2                                                            | CA2    |
| DS | MOL007069 | przewaquinone c                                                                   | Muscarinic acetylcholine receptor M4                                            | CHRM4  |
| DS | MOL007069 | przewaquinone c                                                                   | Delta-type opioid receptor                                                      | OPRD1  |
| DS | MOL007069 | przewaquinone c                                                                   | Acetylcholinesterase                                                            | ACHE   |
| DS | MOL007069 | przewaquinone c                                                                   | Alpha-1A adrenergic receptor                                                    | ADRA1A |
| DS | MOL007069 | przewaquinone c                                                                   | Muscarinic acetylcholine receptor M2                                            | CHRM2  |
| DS | MOL007069 | przewaquinone c                                                                   | Beta-2 adrenergic receptor                                                      | ADRB2  |
| DS | MOL007069 | przewaquinone c                                                                   | Mu-type opioid receptor                                                         | OPRM1  |
| DS | MOL007069 | przewaquinone c                                                                   | Gamma-aminobutyric acid receptor subunit alpha-1                                | GABRA1 |
| DS | MOL007069 | przewaquinone c                                                                   | Dipeptidyl peptidase 4                                                          | DPP4   |
| DS | MOL007069 | przewaquinone c                                                                   | Heat shock protein HSP 90                                                       | HSP90  |
| DS | MOL007069 | przewaquinone c                                                                   | Phosphatidylinositol-4,5-bisphosphate 3-kinase catalytic subunit, gamma isoform | PIK3CG |
| DS | MOL007069 | przewaquinone c                                                                   | Neuronal acetylcholine receptor subunit                                         | CHRNA7 |
| DS | MOL007069 | przewaquinone c                                                                   | Nuclear receptor coactivator 1                                                  | NCOA1  |
| DS | MOL007070 | (6S,7R)-6,7-dihydroxy-1,6-dimethyl-8,9-dihydro-7H-naphtho[8,7-g]benzofuran-10,11- | Thrombin                                                                        | F2     |
| DS | MOL007070 | (6S,7R)-6,7-dihydroxy-1,6-dimethyl-8,9-dihydro-7H-naphtho[8,7-g]benzofuran-10,11- | Prostaglandin G/H synthase 2                                                    | PTGS2  |
| DS | MOL007070 | (6S,7R)-6,7-dihydroxy-1,6-dimethyl-8,9-dihydro-7H-naphtho[8,7-g]benzofuran-10,11- | Carbonic anhydrase 2                                                            | CA2    |
| DS | MOL007070 | (6S,7R)-6,7-dihydroxy-1,6-dimethyl-8,9-dihydro-7H-naphtho[8,7-g]benzofuran-10,11- | Acetylcholinesterase                                                            | ACHE   |

|    |           |                                                                                   |                                                                                 |        |
|----|-----------|-----------------------------------------------------------------------------------|---------------------------------------------------------------------------------|--------|
| DS | MOL007070 | (6S,7R)-6,7-dihydroxy-1,6-dimethyl-8,9-dihydro-7H-naphtho[8,7-g]benzofuran-10,11- | Dipeptidyl peptidase 4                                                          | DPP4   |
| DS | MOL007070 | (6S,7R)-6,7-dihydroxy-1,6-dimethyl-8,9-dihydro-7H-naphtho[8,7-g]benzofuran-10,11- | Heat shock protein HSP 90                                                       | HSP90  |
| DS | MOL007070 | (6S,7R)-6,7-dihydroxy-1,6-dimethyl-8,9-dihydro-7H-naphtho[8,7-g]benzofuran-10,11- | Trypsin-1                                                                       | TRY1   |
| DS | MOL007070 | (6S,7R)-6,7-dihydroxy-1,6-dimethyl-8,9-dihydro-7H-naphtho[8,7-g]benzofuran-10,11- | Nuclear receptor coactivator 1                                                  | NCOA1  |
| DS | MOL007071 | przewaquinone f                                                                   | Thrombin                                                                        | F2     |
| DS | MOL007071 | przewaquinone f                                                                   | Prostaglandin G/H synthase 2                                                    | PTGS2  |
| DS | MOL007071 | przewaquinone f                                                                   | Dipeptidyl peptidase 4                                                          | DPP4   |
| DS | MOL007071 | przewaquinone f                                                                   | Trypsin-1                                                                       | TRY1   |
| DS | MOL007071 | przewaquinone f                                                                   | Nuclear receptor coactivator 1                                                  | NCOA1  |
| DS | MOL007107 | C09092                                                                            | Prostaglandin G/H synthase 2                                                    | PTGS2  |
| DS | MOL007079 | tanshinaldehyde                                                                   | Dopamine D1 receptor                                                            | DRD1   |
| DS | MOL007079 | tanshinaldehyde                                                                   | Thrombin                                                                        | F2     |
| DS | MOL007079 | tanshinaldehyde                                                                   | Muscarinic acetylcholine receptor M1                                            | CHRM1  |
| DS | MOL007079 | tanshinaldehyde                                                                   | Prostaglandin G/H synthase 2                                                    | PTGS2  |
| DS | MOL007079 | tanshinaldehyde                                                                   | Delta-type opioid receptor                                                      | OPRD1  |
| DS | MOL007079 | tanshinaldehyde                                                                   | Acetylcholinesterase                                                            | ACHE   |
| DS | MOL007079 | tanshinaldehyde                                                                   | 5-hydroxytryptamine 2A receptor                                                 | HTR2A  |
| DS | MOL007079 | tanshinaldehyde                                                                   | Beta-2 adrenergic receptor                                                      | ADRB2  |
| DS | MOL007079 | tanshinaldehyde                                                                   | Mu-type opioid receptor                                                         | OPRM1  |
| DS | MOL007079 | tanshinaldehyde                                                                   | Dipeptidyl peptidase 4                                                          | DPP4   |
| DS | MOL007079 | tanshinaldehyde                                                                   | Neuronal acetylcholine receptor subunit                                         | CHRNA7 |
| DS | MOL007079 | tanshinaldehyde                                                                   | Trypsin-1                                                                       | TRY1   |
| DS | MOL007079 | tanshinaldehyde                                                                   | Nuclear receptor coactivator 1                                                  | NCOA1  |
| DS | MOL007081 | Danshenol B                                                                       | Prostaglandin G/H synthase 2                                                    | PTGS2  |
| DS | MOL007081 | Danshenol B                                                                       | Carbonic anhydrase 2                                                            | CA2    |
| DS | MOL007081 | Danshenol B                                                                       | Progesterone receptor                                                           | PGR    |
| DS | MOL007081 | Danshenol B                                                                       | DNA topoisomerase II                                                            | TOP2   |
| DS | MOL007081 | Danshenol B                                                                       | Mu-type opioid receptor                                                         | OPRM1  |
| DS | MOL007081 | Danshenol B                                                                       | Glucocorticoid receptor                                                         | NR3C1  |
| DS | MOL007081 | Danshenol B                                                                       | Heat shock protein HSP 90                                                       | HSP90  |
| DS | MOL007081 | Danshenol B                                                                       | Nuclear receptor coactivator 1                                                  | NCOA1  |
| DS | MOL007082 | Danshenol A                                                                       | Prostaglandin G/H synthase 1                                                    | PTGS1  |
| DS | MOL007082 | Danshenol A                                                                       | Potassium voltage-gated channel subfamily H member 2                            | KCNH2  |
| DS | MOL007082 | Danshenol A                                                                       | Sodium channel protein type 5 subunit alpha                                     | SCN5A  |
| DS | MOL007082 | Danshenol A                                                                       | Coagulation factor X                                                            | F10    |
| DS | MOL007082 | Danshenol A                                                                       | Prostaglandin G/H synthase 2                                                    | PTGS2  |
| DS | MOL007082 | Danshenol A                                                                       | Retinoic acid receptor RXR-alpha                                                | RXRA   |
| DS | MOL007082 | Danshenol A                                                                       | Phosphatidylinositol-4,5-bisphosphate 3-kinase catalytic subunit, gamma isoform | PIK3CG |

|    |           |                  |                                                      |        |
|----|-----------|------------------|------------------------------------------------------|--------|
| DS | MOL007082 | Danshenol A      | Nuclear receptor coactivator 1                       | NCOA1  |
| DS | MOL007082 | Danshenol A      | Calcium-activated potassium channel subunit alpha-1  | KCNMA1 |
| DS | MOL007085 | Salvilenone      | Prostaglandin G/H synthase 1                         | PTGS1  |
| DS | MOL007085 | Salvilenone      | Estrogen receptor                                    | ER     |
| DS | MOL007085 | Salvilenone      | Androgen receptor                                    | AR     |
| DS | MOL007085 | Salvilenone      | Muscarinic acetylcholine receptor M5                 | CHRM5  |
| DS | MOL007085 | Salvilenone      | Prostaglandin G/H synthase 2                         | PTGS2  |
| DS | MOL007085 | Salvilenone      | 5-hydroxytryptamine receptor 3A                      | HTR3A  |
| DS | MOL007085 | Salvilenone      | Estrogen receptor beta                               | ESR2   |
| DS | MOL007085 | Salvilenone      | Proto-oncogene serine/threonine-protein kinase Pim-1 | PIM1   |
| DS | MOL007088 | cryptotanshinone | Prostaglandin G/H synthase 1                         | PTGS1  |
| DS | MOL007088 | cryptotanshinone | Dopamine D1 receptor                                 | DRD1   |
| DS | MOL007088 | cryptotanshinone | Muscarinic acetylcholine receptor M3                 | CHRM3  |
| DS | MOL007088 | cryptotanshinone | Muscarinic acetylcholine receptor M1                 | CHRM1  |
| DS | MOL007088 | cryptotanshinone | Sodium channel protein type 5 subunit alpha          | SCN5A  |
| DS | MOL007088 | cryptotanshinone | Muscarinic acetylcholine receptor M5                 | CHRM5  |
| DS | MOL007088 | cryptotanshinone | Prostaglandin G/H synthase 2                         | PTGS2  |
| DS | MOL007088 | cryptotanshinone | Carbonic anhydrase 2                                 | CA2    |
| DS | MOL007088 | cryptotanshinone | Muscarinic acetylcholine receptor M4                 | CHRM4  |
| DS | MOL007088 | cryptotanshinone | Delta-type opioid receptor                           | OPRD1  |
| DS | MOL007088 | cryptotanshinone | Alpha-1A adrenergic receptor                         | ADRA1A |
| DS | MOL007088 | cryptotanshinone | Muscarinic acetylcholine receptor M2                 | CHRM2  |
| DS | MOL007088 | cryptotanshinone | Alpha-1B adrenergic receptor                         | ADRA1B |
| DS | MOL007088 | cryptotanshinone | Beta-2 adrenergic receptor                           | ADRB2  |
| DS | MOL007088 | cryptotanshinone | Alpha-1D adrenergic receptor                         | ADRA1D |
| DS | MOL007088 | cryptotanshinone | DNA topoisomerase II                                 | TOP2   |
| DS | MOL007088 | cryptotanshinone | Mu-type opioid receptor                              | OPRM1  |
| DS | MOL007088 | cryptotanshinone | Neuronal acetylcholine receptor subunit              | CHRNA7 |
| DS | MOL007088 | cryptotanshinone | Nuclear receptor coactivator 2                       | NCOA2  |
| DS | MOL007088 | cryptotanshinone | Nuclear receptor coactivator 1                       | NCOA1  |
| DS | MOL007088 | cryptotanshinone | Progesterone receptor                                | PGR    |
| DS | MOL007088 | cryptotanshinone | Gamma-aminobutyric acid receptor subunit alpha-1     | GABRA1 |
| DS | MOL007088 | cryptotanshinone | Transcription factor p65                             | RELA   |
| DS | MOL007088 | cryptotanshinone | Signal transducer and activator of                   | STAT3  |
| DS | MOL007088 | cryptotanshinone | G1/S-specific cyclin-D1                              | CCND1  |
| DS | MOL007088 | cryptotanshinone | Bcl-2-like protein 1                                 | BCL2L1 |
| DS | MOL007088 | cryptotanshinone | Tumor necrosis factor                                | TNF    |
| DS | MOL007088 | cryptotanshinone | Amyloid beta A4 protein                              | ABPA4  |
| DS | MOL007088 | cryptotanshinone | Endothelin-1                                         | EDN1   |
| DS | MOL007088 | cryptotanshinone | Baculoviral IAP repeat-containing protein 5          | BIRC5  |
| DS | MOL007093 | dan-shexinkum d  | Nitric oxide synthase, inducible                     | NOS2   |
| DS | MOL007093 | dan-shexinkum d  | Prostaglandin G/H synthase 1                         | PTGS1  |
| DS | MOL007093 | dan-shexinkum d  | Thrombin                                             | F2     |
| DS | MOL007093 | dan-shexinkum d  | Potassium voltage-gated channel subfamily H member 2 | KCNH2  |
| DS | MOL007093 | dan-shexinkum d  | Muscarinic acetylcholine receptor M1                 | CHRM1  |
| DS | MOL007093 | dan-shexinkum d  | Estrogen receptor                                    | ER     |
| DS | MOL007093 | dan-shexinkum d  | Androgen receptor                                    | AR     |
| DS | MOL007093 | dan-shexinkum d  | Sodium channel protein type 5 subunit alpha          | SCN5A  |
| DS | MOL007093 | dan-shexinkum d  | Peroxisome proliferator activated receptor gamma     | PPARG  |
| DS | MOL007093 | dan-shexinkum d  | Coagulation factor X                                 | F10    |
| DS | MOL007093 | dan-shexinkum d  | Prostaglandin G/H synthase 2                         | PTGS2  |
| DS | MOL007093 | dan-shexinkum d  | Carbonic anhydrase 2                                 | CA2    |
| DS | MOL007093 | dan-shexinkum d  | Retinoic acid receptor RXR-alpha                     | RXRA   |
| DS | MOL007093 | dan-shexinkum d  | Acetylcholinesterase                                 | ACHE   |

|    |           |                          |                                                      |        |
|----|-----------|--------------------------|------------------------------------------------------|--------|
| DS | MOL007093 | dan-shexinkum d          | Alpha-1B adrenergic receptor                         | ADRA1B |
| DS | MOL007093 | dan-shexinkum d          | Beta-2 adrenergic receptor                           | ADRB2  |
| DS | MOL007093 | dan-shexinkum d          | DNA topoisomerase II                                 | TOP2   |
| DS | MOL007093 | dan-shexinkum d          | Estrogen receptor beta                               | ESR2   |
| DS | MOL007093 | dan-shexinkum d          | Dipeptidyl peptidase 4                               | DPP4   |
| DS | MOL007093 | dan-shexinkum d          | Glycogen synthase kinase-3 beta                      | GSK3B  |
| DS | MOL007093 | dan-shexinkum d          | Cell division protein kinase 2                       | CDK2   |
| DS | MOL007093 | dan-shexinkum d          | Serine/threonine-protein kinase Chk1                 | CHEK1  |
| DS | MOL007093 | dan-shexinkum d          | Ig gamma-1 chain C region                            | IGHG1  |
| DS | MOL007093 | dan-shexinkum d          | Trypsin-1                                            | TRY1   |
| DS | MOL007093 | dan-shexinkum d          | Proto-oncogene serine/threonine-protein kinase Pim-1 | PIM1   |
| DS | MOL007093 | dan-shexinkum d          | Cyclin-A2                                            | CCNA2  |
| DS | MOL007093 | dan-shexinkum d          | Nuclear receptor coactivator 2                       | NCOA2  |
| DS | MOL007093 | dan-shexinkum d          | Nuclear receptor coactivator 1                       | NCOA1  |
| DS | MOL007093 | dan-shexinkum d          | Calmodulin                                           | CALM   |
| DS | MOL007094 | danshenspiroketallactone | Prostaglandin G/H synthase 1                         | PTGS1  |
| DS | MOL007094 | danshenspiroketallactone | Dopamine D1 receptor                                 | DRD1   |
| DS | MOL007094 | danshenspiroketallactone | Muscarinic acetylcholine receptor M3                 | CHRM3  |
| DS | MOL007094 | danshenspiroketallactone | Thrombin                                             | F2     |
| DS | MOL007094 | danshenspiroketallactone | Muscarinic acetylcholine receptor M1                 | CHRM1  |
| DS | MOL007094 | danshenspiroketallactone | Estrogen receptor                                    | ER     |
| DS | MOL007094 | danshenspiroketallactone | Sodium channel protein type 5 subunit alpha          | SCN5A  |
| DS | MOL007094 | danshenspiroketallactone | Muscarinic acetylcholine receptor M5                 | CHRM5  |
| DS | MOL007094 | danshenspiroketallactone | Prostaglandin G/H synthase 2                         | PTGS2  |
| DS | MOL007094 | danshenspiroketallactone | Carbonic anhydrase 2                                 | CA2    |
| DS | MOL007094 | danshenspiroketallactone | Muscarinic acetylcholine receptor M4                 | CHRM4  |
| DS | MOL007094 | danshenspiroketallactone | Retinoic acid receptor RXR-alpha                     | RXRA   |
| DS | MOL007094 | danshenspiroketallactone | Acetylcholinesterase                                 | ACHE   |
| DS | MOL007094 | danshenspiroketallactone | Alpha-1A adrenergic receptor                         | ADRA1A |
| DS | MOL007094 | danshenspiroketallactone | Muscarinic acetylcholine receptor M2                 | CHRM2  |
| DS | MOL007094 | danshenspiroketallactone | Alpha-1B adrenergic receptor                         | ADRA1B |
| DS | MOL007094 | danshenspiroketallactone | Beta-2 adrenergic receptor                           | ADRB2  |
| DS | MOL007094 | danshenspiroketallactone | Alpha-1D adrenergic receptor                         | ADRA1D |
| DS | MOL007094 | danshenspiroketallactone | Neuronal acetylcholine receptor subunit alpha-2      | CHRNA2 |
| DS | MOL007094 | danshenspiroketallactone | Sodium-dependent serotonin transporter               | SLC6A4 |
| DS | MOL007094 | danshenspiroketallactone | Mu-type opioid receptor                              | OPRM1  |
| DS | MOL007094 | danshenspiroketallactone | Gamma-aminobutyric acid receptor subunit alpha-1     | GABRA1 |
| DS | MOL007094 | danshenspiroketallactone | Dipeptidyl peptidase 4                               | DPP4   |

|    |           |                          |                                                      |        |
|----|-----------|--------------------------|------------------------------------------------------|--------|
| DS | MOL007094 | danshenspiroketallactone | Heat shock protein HSP 90                            | HSP90  |
| DS | MOL007094 | danshenspiroketallactone | Neuronal acetylcholine receptor subunit alpha-7      | CHRNA7 |
| DS | MOL007098 | deoxyneocryptotanshinone | Prostaglandin G/H synthase 1                         | PTGS1  |
| DS | MOL007098 | deoxyneocryptotanshinone | Dopamine D1 receptor                                 | DRD1   |
| DS | MOL007098 | deoxyneocryptotanshinone | Muscarinic acetylcholine receptor M3                 | CHRM3  |
| DS | MOL007098 | deoxyneocryptotanshinone | Muscarinic acetylcholine receptor M1                 | CHRM1  |
| DS | MOL007098 | deoxyneocryptotanshinone | Estrogen receptor                                    | ER     |
| DS | MOL007098 | deoxyneocryptotanshinone | Androgen receptor                                    | AR     |
| DS | MOL007098 | deoxyneocryptotanshinone | Sodium channel protein type 5 subunit alpha          | SCN5A  |
| DS | MOL007098 | deoxyneocryptotanshinone | Muscarinic acetylcholine receptor M5                 | CHRM5  |
| DS | MOL007098 | deoxyneocryptotanshinone | Prostaglandin G/H synthase 2                         | PTGS2  |
| DS | MOL007098 | deoxyneocryptotanshinone | Nitric oxide synthase, endothelial                   | NOS3   |
| DS | MOL007098 | deoxyneocryptotanshinone | Carbonic anhydrase 2                                 | CA2    |
| DS | MOL007098 | deoxyneocryptotanshinone | Muscarinic acetylcholine receptor M4                 | CHRM4  |
| DS | MOL007098 | deoxyneocryptotanshinone | Retinoic acid receptor RXR-alpha                     | RXRA   |
| DS | MOL007098 | deoxyneocryptotanshinone | Delta-type opioid receptor                           | OPRD1  |
| DS | MOL007098 | deoxyneocryptotanshinone | Alpha-1A adrenergic receptor                         | ADRA1A |
| DS | MOL007098 | deoxyneocryptotanshinone | Muscarinic acetylcholine receptor M2                 | CHRM2  |
| DS | MOL007098 | deoxyneocryptotanshinone | Alpha-1B adrenergic receptor                         | ADRA1B |
| DS | MOL007098 | deoxyneocryptotanshinone | Beta-2 adrenergic receptor                           | ADRB2  |
| DS | MOL007098 | deoxyneocryptotanshinone | Alpha-1D adrenergic receptor                         | ADRA1D |
| DS | MOL007098 | deoxyneocryptotanshinone | DNA topoisomerase II                                 | TOP2   |
| DS | MOL007098 | deoxyneocryptotanshinone | Mu-type opioid receptor                              | OPRM1  |
| DS | MOL007098 | deoxyneocryptotanshinone | Glycogen synthase kinase-3 beta                      | GSK3B  |
| DS | MOL007098 | deoxyneocryptotanshinone | Cell division protein kinase 2                       | CDK2   |
| DS | MOL007098 | deoxyneocryptotanshinone | Neuronal acetylcholine receptor subunit alpha-7      | CHRNA7 |
| DS | MOL007098 | deoxyneocryptotanshinone | Ig gamma-1 chain C region                            | IGHG1  |
| DS | MOL007098 | deoxyneocryptotanshinone | Proto-oncogene serine/threonine-protein kinase Pim-1 | PIM1   |
| DS | MOL007098 | deoxyneocryptotanshinone | Nuclear receptor coactivator 2                       | NCOA2  |
| DS | MOL007098 | deoxyneocryptotanshinone | Nuclear receptor coactivator 1                       | NCOA1  |
| DS | MOL007100 | dihydrotanshinlactone    | Nitric oxide synthase, inducible                     | NOS2   |
| DS | MOL007100 | dihydrotanshinlactone    | Prostaglandin G/H synthase 1                         | PTGS1  |
| DS | MOL007100 | dihydrotanshinlactone    | Dopamine D1 receptor                                 | DRD1   |



|    |           |                            |                                                                                 |        |
|----|-----------|----------------------------|---------------------------------------------------------------------------------|--------|
| DS | MOL007100 | dihydrotanshinlactone      | Muscarinic acetylcholine receptor M3                                            | CHRM3  |
| DS | MOL007100 | dihydrotanshinlactone      | Thrombin                                                                        | F2     |
| DS | MOL007100 | dihydrotanshinlactone      | Muscarinic acetylcholine receptor M1                                            | CHRM1  |
| DS | MOL007100 | dihydrotanshinlactone      | Estrogen receptor                                                               | ER     |
| DS | MOL007100 | dihydrotanshinlactone      | Androgen receptor                                                               | AR     |
| DS | MOL007100 | dihydrotanshinlactone      | Sodium channel protein type 5 subunit alpha                                     | SCN5A  |
| DS | MOL007100 | dihydrotanshinlactone      | Peroxisome proliferator activated receptor gamma                                | PPARG  |
| DS | MOL007100 | dihydrotanshinlactone      | Muscarinic acetylcholine receptor M5                                            | CHRM5  |
| DS | MOL007100 | dihydrotanshinlactone      | Prostaglandin G/H synthase 2                                                    | PTGS2  |
| DS | MOL007100 | dihydrotanshinlactone      | 5-hydroxytryptamine receptor 3A                                                 | HTR3A  |
| DS | MOL007100 | dihydrotanshinlactone      | Carbonic anhydrase 2                                                            | CA2    |
| DS | MOL007100 | dihydrotanshinlactone      | Retinoic acid receptor RXR-alpha                                                | RXRA   |
| DS | MOL007100 | dihydrotanshinlactone      | Acetylcholinesterase                                                            | ACHE   |
| DS | MOL007100 | dihydrotanshinlactone      | CGMP-inhibited 3',5'-cyclic phosphodiesterase A                                 | PDE3A  |
| DS | MOL007100 | dihydrotanshinlactone      | 5-hydroxytryptamine 2A receptor                                                 | HTR2A  |
| DS | MOL007100 | dihydrotanshinlactone      | Alpha-1A adrenergic receptor                                                    | ADRA1A |
| DS | MOL007100 | dihydrotanshinlactone      | Alpha-1B adrenergic receptor                                                    | ADRA1B |
| DS | MOL007100 | dihydrotanshinlactone      | mRNA of Protein-tyrosine phosphatase, non-receptor type 1                       | PTPN1  |
| DS | MOL007100 | dihydrotanshinlactone      | Sodium-dependent dopamine transporter                                           | SLC6A3 |
| DS | MOL007100 | dihydrotanshinlactone      | Beta-2 adrenergic receptor                                                      | ADRB2  |
| DS | MOL007100 | dihydrotanshinlactone      | Alpha-1D adrenergic receptor                                                    | ADRA1D |
| DS | MOL007100 | dihydrotanshinlactone      | Sodium-dependent serotonin transporter                                          | SLC6A4 |
| DS | MOL007100 | dihydrotanshinlactone      | Mu-type opioid receptor                                                         | OPRM1  |
| DS | MOL007100 | dihydrotanshinlactone      | Gamma-aminobutyric acid receptor subunit alpha-1                                | GABRA1 |
| DS | MOL007100 | dihydrotanshinlactone      | Dipeptidyl peptidase 4                                                          | DPP4   |
| DS | MOL007100 | dihydrotanshinlactone      | Glycogen synthase kinase-3 beta                                                 | GSK3B  |
| DS | MOL007100 | dihydrotanshinlactone      | Phosphatidylinositol-4,5-bisphosphate 3-kinase catalytic subunit, gamma isoform | PIK3CG |
| DS | MOL007100 | dihydrotanshinlactone      | Neuronal acetylcholine receptor subunit                                         | CHRNA7 |
| DS | MOL007100 | dihydrotanshinlactone      | mRNA of PKA Catalytic Subunit C-alpha                                           | PRKACA |
| DS | MOL007100 | dihydrotanshinlactone      | Ig gamma-1 chain C region                                                       | IGHG1  |
| DS | MOL007100 | dihydrotanshinlactone      | Trypsin-1                                                                       | TRY1   |
| DS | MOL007100 | dihydrotanshinlactone      | Proto-oncogene serine/threonine-protein kinase Pim-1                            | PIM1   |
| DS | MOL007100 | dihydrotanshinlactone      | Cyclin-A2                                                                       | CCNA2  |
| DS | MOL007101 | dihydrotanshinone          | Prostaglandin G/H synthase 1                                                    | PTGS1  |
| DS | MOL007101 | dihydrotanshinone          | Sodium channel protein type 5 subunit alpha                                     | SCN5A  |
| DS | MOL007101 | dihydrotanshinone          | Prostaglandin G/H synthase 2                                                    | PTGS2  |
| DS | MOL007101 | dihydrotanshinone          | 5-hydroxytryptamine receptor 3A                                                 | HTR3A  |
| DS | MOL007101 | dihydrotanshinone          | Retinoic acid receptor RXR-alpha                                                | RXRA   |
| DS | MOL007101 | dihydrotanshinone          | Alpha-1A adrenergic receptor                                                    | ADRA1A |
| DS | MOL007101 | dihydrotanshinone          | Alpha-1B adrenergic receptor                                                    | ADRA1B |
| DS | MOL007101 | dihydrotanshinone          | Beta-2 adrenergic receptor                                                      | ADRB2  |
| DS | MOL007101 | dihydrotanshinone          | Gamma-aminobutyric acid receptor subunit alpha-1                                | GABRA1 |
| DS | MOL007101 | dihydrotanshinone          | Heat shock protein HSP 90                                                       | HSP90  |
| DS | MOL007101 | dihydrotanshinone          | Phosphatidylinositol-4,5-bisphosphate 3-kinase catalytic subunit, gamma isoform | PIK3CG |
| DS | MOL007101 | dihydrotanshinone          | Neuronal acetylcholine receptor subunit                                         | CHRNA7 |
| DS | MOL007101 | dihydrotanshinone          | mRNA of PKA Catalytic Subunit C-alpha                                           | PRKACA |
| DS | MOL007101 | dihydrotanshinone          | Ig gamma-1 chain C region                                                       | IGHG1  |
| DS | MOL007101 | dihydrotanshinone          | Nuclear receptor coactivator 2                                                  | NCOA2  |
| DS | MOL007101 | dihydrotanshinone          | Nuclear receptor coactivator 1                                                  | NCOA1  |
| DS | MOL007101 | dihydrotanshinone          | Calmodulin                                                                      | CALM   |
| DS | MOL007105 | epidanshenspiroketalactone | Prostaglandin G/H synthase 1                                                    | PTGS1  |

|    |           |                                 |                                                         |        |
|----|-----------|---------------------------------|---------------------------------------------------------|--------|
| DS | MOL007105 | epidanshenspiroketall<br>actone | Dopamine D1 receptor                                    | DRD1   |
| DS | MOL007105 | epidanshenspiroketall<br>actone | Muscarinic acetylcholine receptor M3                    | CHRM3  |
| DS | MOL007105 | epidanshenspiroketall<br>actone | Muscarinic acetylcholine receptor M1                    | CHRM1  |
| DS | MOL007105 | epidanshenspiroketall<br>actone | Estrogen receptor                                       | ER     |
| DS | MOL007105 | epidanshenspiroketall<br>actone | Sodium channel protein type 5 subunit alpha             | SCN5A  |
| DS | MOL007105 | epidanshenspiroketall<br>actone | Muscarinic acetylcholine receptor M5                    | CHRM5  |
| DS | MOL007105 | epidanshenspiroketall<br>actone | Prostaglandin G/H synthase 2                            | PTGS2  |
| DS | MOL007105 | epidanshenspiroketall<br>actone | Nitric oxide synthase, endothelial                      | NOS3   |
| DS | MOL007105 | epidanshenspiroketall<br>actone | Muscarinic acetylcholine receptor M4                    | CHRM4  |
| DS | MOL007105 | epidanshenspiroketall<br>actone | Retinoic acid receptor RXR-alpha                        | RXRA   |
| DS | MOL007105 | epidanshenspiroketall<br>actone | Delta-type opioid receptor                              | OPRD1  |
| DS | MOL007105 | epidanshenspiroketall<br>actone | CGMP-inhibited 3',5'-cyclic<br>phosphodiesterase A      | PDE3A  |
| DS | MOL007105 | epidanshenspiroketall<br>actone | 5-hydroxytryptamine 2A receptor                         | HTR2A  |
| DS | MOL007105 | epidanshenspiroketall<br>actone | Alpha-1A adrenergic receptor                            | ADRA1A |
| DS | MOL007105 | epidanshenspiroketall<br>actone | Muscarinic acetylcholine receptor M2                    | CHRM2  |
| DS | MOL007105 | epidanshenspiroketall<br>actone | Alpha-1B adrenergic receptor                            | ADRA1B |
| DS | MOL007105 | epidanshenspiroketall<br>actone | Beta-2 adrenergic receptor                              | ADRB2  |
| DS | MOL007105 | epidanshenspiroketall<br>actone | Alpha-1D adrenergic receptor                            | ADRA1D |
| DS | MOL007105 | epidanshenspiroketall<br>actone | Sodium-dependent serotonin transporter                  | SLC6A4 |
| DS | MOL007105 | epidanshenspiroketall<br>actone | Mu-type opioid receptor                                 | OPRM1  |
| DS | MOL007105 | epidanshenspiroketall<br>actone | Gamma-aminobutyric acid receptor subunit<br>alpha-1     | GABRA1 |
| DS | MOL007105 | epidanshenspiroketall<br>actone | Heat shock protein HSP 90                               | HSP90  |
| DS | MOL007105 | epidanshenspiroketall<br>actone | Cell division protein kinase 2                          | CDK2   |
| DS | MOL007105 | epidanshenspiroketall<br>actone | Neuronal acetylcholine receptor subunit<br>alpha-7      | CHRNA7 |
| DS | MOL007105 | epidanshenspiroketall<br>actone | Proto-oncogene serine/threonine-protein<br>kinase Pim-1 | PIM1   |
| DS | MOL007107 | C09092                          | Muscarinic acetylcholine receptor M3                    | CHRM3  |
| DS | MOL007107 | C09092                          | Thrombin                                                | F2     |
| DS | MOL007107 | C09092                          | Muscarinic acetylcholine receptor M1                    | CHRM1  |
| DS | MOL007107 | C09092                          | Sodium channel protein type 5 subunit alpha             | SCN5A  |
| DS | MOL007107 | C09092                          | Carbonic anhydrase 2                                    | CA2    |
| DS | MOL007107 | C09092                          | Acetylcholinesterase                                    | ACHE   |
| DS | MOL007107 | C09092                          | Alpha-1A adrenergic receptor                            | ADRA1A |
| DS | MOL007107 | C09092                          | Muscarinic acetylcholine receptor M2                    | CHRM2  |
| DS | MOL007107 | C09092                          | Alpha-1B adrenergic receptor                            | ADRA1B |
| DS | MOL007107 | C09092                          | Beta-2 adrenergic receptor                              | ADRB2  |
| DS | MOL007107 | C09092                          | Alpha-1D adrenergic receptor                            | ADRA1D |
| DS | MOL007107 | C09092                          | Mu-type opioid receptor                                 | OPRM1  |

|    |           |                      |                                                      |        |
|----|-----------|----------------------|------------------------------------------------------|--------|
| DS | MOL007108 | isocryptotanshi-none | Nitric oxide synthase, inducible                     | NOS2   |
| DS | MOL007108 | isocryptotanshi-none | Prostaglandin G/H synthase 1                         | PTGS1  |
| DS | MOL007108 | isocryptotanshi-none | Dopamine D1 receptor                                 | DRD1   |
| DS | MOL007108 | isocryptotanshi-none | Muscarinic acetylcholine receptor M3                 | CHRM3  |
| DS | MOL007108 | isocryptotanshi-none | Muscarinic acetylcholine receptor M1                 | CHRM1  |
| DS | MOL007108 | isocryptotanshi-none | Estrogen receptor                                    | ER     |
| DS | MOL007108 | isocryptotanshi-none | Androgen receptor                                    | AR     |
| DS | MOL007108 | isocryptotanshi-none | Sodium channel protein type 5 subunit alpha          | SCN5A  |
| DS | MOL007108 | isocryptotanshi-none | Coagulation factor X                                 | F10    |
| DS | MOL007108 | isocryptotanshi-none | Muscarinic acetylcholine receptor M5                 | CHRM5  |
| DS | MOL007108 | isocryptotanshi-none | Prostaglandin G/H synthase 2                         | PTGS2  |
| DS | MOL007108 | isocryptotanshi-none | Carbonic anhydrase 2                                 | CA2    |
| DS | MOL007108 | isocryptotanshi-none | Muscarinic acetylcholine receptor M4                 | CHRM4  |
| DS | MOL007108 | isocryptotanshi-none | Retinoic acid receptor RXR-alpha                     | RXRA   |
| DS | MOL007108 | isocryptotanshi-none | Delta-type opioid receptor                           | OPRD1  |
| DS | MOL007108 | isocryptotanshi-none | Acetylcholinesterase                                 | ACHE   |
| DS | MOL007108 | isocryptotanshi-none | Alpha-1A adrenergic receptor                         | ADRA1A |
| DS | MOL007108 | isocryptotanshi-none | Muscarinic acetylcholine receptor M2                 | CHRM2  |
| DS | MOL007108 | isocryptotanshi-none | Alpha-1B adrenergic receptor                         | ADRA1B |
| DS | MOL007108 | isocryptotanshi-none | Beta-2 adrenergic receptor                           | ADRB2  |
| DS | MOL007108 | isocryptotanshi-none | Alpha-1D adrenergic receptor                         | ADRA1D |
| DS | MOL007108 | isocryptotanshi-none | DNA topoisomerase II                                 | TOP2   |
| DS | MOL007108 | isocryptotanshi-none | D(2) dopamine receptor                               | DRD2   |
| DS | MOL007108 | isocryptotanshi-none | Mu-type opioid receptor                              | OPRM1  |
| DS | MOL007108 | isocryptotanshi-none | Gamma-aminobutyric acid receptor subunit alpha-1     | GABRA1 |
| DS | MOL007108 | isocryptotanshi-none | Cell division protein kinase 2                       | CDK2   |
| DS | MOL007108 | isocryptotanshi-none | Neuronal acetylcholine receptor subunit              | CHRNA7 |
| DS | MOL007108 | isocryptotanshi-none | Trypsin-1                                            | TRY1   |
| DS | MOL007108 | isocryptotanshi-none | Proto-oncogene serine/threonine-protein kinase Pim-1 | PIM1   |
| DS | MOL007108 | isocryptotanshi-none | Nuclear receptor coactivator 2                       | NCOA2  |
| DS | MOL007108 | isocryptotanshi-none | Nuclear receptor coactivator 1                       | NCOA1  |
| DS | MOL007111 | Isotanshinone II     | Nitric oxide synthase, inducible                     | NOS2   |
| DS | MOL007111 | Isotanshinone II     | Dopamine D1 receptor                                 | DRD1   |
| DS | MOL007111 | Isotanshinone II     | Muscarinic acetylcholine receptor M3                 | CHRM3  |
| DS | MOL007111 | Isotanshinone II     | Thrombin                                             | F2     |
| DS | MOL007111 | Isotanshinone II     | Muscarinic acetylcholine receptor M1                 | CHRM1  |
| DS | MOL007111 | Isotanshinone II     | Estrogen receptor                                    | ER     |
| DS | MOL007111 | Isotanshinone II     | Androgen receptor                                    | AR     |
| DS | MOL007111 | Isotanshinone II     | Sodium channel protein type 5 subunit alpha          | SCN5A  |
| DS | MOL007111 | Isotanshinone II     | Muscarinic acetylcholine receptor M5                 | CHRM5  |
| DS | MOL007111 | Isotanshinone II     | Prostaglandin G/H synthase 2                         | PTGS2  |
| DS | MOL007111 | Isotanshinone II     | Retinoic acid receptor RXR-alpha                     | RXRA   |
| DS | MOL007111 | Isotanshinone II     | Delta-type opioid receptor                           | OPRD1  |
| DS | MOL007111 | Isotanshinone II     | Acetylcholinesterase                                 | ACHE   |
| DS | MOL007111 | Isotanshinone II     | Alpha-1A adrenergic receptor                         | ADRA1A |
| DS | MOL007111 | Isotanshinone II     | Muscarinic acetylcholine receptor M2                 | CHRM2  |
| DS | MOL007111 | Isotanshinone II     | Beta-2 adrenergic receptor                           | ADRB2  |
| DS | MOL007111 | Isotanshinone II     | Mu-type opioid receptor                              | OPRM1  |
| DS | MOL007111 | Isotanshinone II     | Estrogen receptor beta                               | ESR2   |
| DS | MOL007111 | Isotanshinone II     | Gamma-aminobutyric acid receptor subunit alpha-1     | GABRA1 |
| DS | MOL007111 | Isotanshinone II     | Dipeptidyl peptidase 4                               | DPP4   |
| DS | MOL007111 | Isotanshinone II     | Glycogen synthase kinase-3 beta                      | GSK3B  |
| DS | MOL007111 | Isotanshinone II     | Cell division protein kinase 2                       | CDK2   |
| DS | MOL007111 | Isotanshinone II     | Neuronal acetylcholine receptor subunit              | CHRNA7 |
| DS | MOL007111 | Isotanshinone II     | Serine/threonine-protein kinase Chk1                 | CHEK1  |

|    |           |                  |                                                      |        |
|----|-----------|------------------|------------------------------------------------------|--------|
| DS | MOL007111 | Isotanshinone II | Proto-oncogene serine/threonine-protein kinase Pim-1 | PIM1   |
| DS | MOL007111 | Isotanshinone II | Cyclin-A2                                            | CCNA2  |
| DS | MOL007115 | manool           | Nuclear receptor coactivator 2                       | NCOA2  |
| DS | MOL007119 | miltionone I     | Prostaglandin G/H synthase 1                         | PTGS1  |
| DS | MOL007119 | miltionone I     | Muscarinic acetylcholine receptor M3                 | CHRM3  |
| DS | MOL007119 | miltionone I     | Muscarinic acetylcholine receptor M1                 | CHRM1  |
| DS | MOL007119 | miltionone I     | Estrogen receptor                                    | ER     |
| DS | MOL007119 | miltionone I     | Androgen receptor                                    | AR     |
| DS | MOL007119 | miltionone I     | Sodium channel protein type 5 subunit alpha          | SCN5A  |
| DS | MOL007119 | miltionone I     | Coagulation factor X                                 | F10    |
| DS | MOL007119 | miltionone I     | Prostaglandin G/H synthase 2                         | PTGS2  |
| DS | MOL007119 | miltionone I     | Carbonic anhydrase 2                                 | CA2    |
| DS | MOL007119 | miltionone I     | Retinoic acid receptor RXR-alpha                     | RXRA   |
| DS | MOL007119 | miltionone I     | Delta-type opioid receptor                           | OPRD1  |
| DS | MOL007119 | miltionone I     | 5-hydroxytryptamine 2A receptor                      | HTR2A  |
| DS | MOL007119 | miltionone I     | Alpha-1A adrenergic receptor                         | ADRA1A |
| DS | MOL007119 | miltionone I     | Muscarinic acetylcholine receptor M2                 | CHRM2  |
| DS | MOL007119 | miltionone I     | Alpha-1B adrenergic receptor                         | ADRA1B |
| DS | MOL007119 | miltionone I     | Beta-2 adrenergic receptor                           | ADRB2  |
| DS | MOL007119 | miltionone I     | DNA topoisomerase II                                 | TOP2   |
| DS | MOL007119 | miltionone I     | Mu-type opioid receptor                              | OPRM1  |
| DS | MOL007119 | miltionone I     | Glucocorticoid receptor                              | NR3C1  |
| DS | MOL007119 | miltionone I     | Glycogen synthase kinase-3 beta                      | GSK3B  |
| DS | MOL007119 | miltionone I     | Cell division protein kinase 2                       | CDK2   |
| DS | MOL007119 | miltionone I     | Beta-lactamase                                       | BLAC   |
| DS | MOL007119 | miltionone I     | Neuronal acetylcholine receptor subunit              | CHRNA7 |
| DS | MOL007119 | miltionone I     | Ig gamma-1 chain C region                            | IGHG1  |
| DS | MOL007119 | miltionone I     | Proto-oncogene serine/threonine-protein kinase Pim-1 | PIM1   |
| DS | MOL007119 | miltionone I     | Cyclin-A2                                            | CCNA2  |
| DS | MOL007119 | miltionone I     | Nuclear receptor coactivator 2                       | NCOA2  |
| DS | MOL007119 | miltionone I     | Nuclear receptor coactivator 1                       | NCOA1  |
| DS | MOL007120 | miltionone II    | Thrombin                                             | F2     |
| DS | MOL007120 | miltionone II    | Prostaglandin G/H synthase 2                         | PTGS2  |
| DS | MOL007120 | miltionone II    | Carbonic anhydrase 2                                 | CA2    |
| DS | MOL007120 | miltionone II    | Acetylcholinesterase                                 | ACHE   |
| DS | MOL007120 | miltionone II    | Progesterone receptor                                | PGR    |
| DS | MOL007120 | miltionone II    | Glucocorticoid receptor                              | NR3C1  |
| DS | MOL007120 | miltionone II    | Nuclear receptor coactivator 2                       | NCOA2  |
| DS | MOL007120 | miltionone II    | Nuclear receptor coactivator 1                       | NCOA1  |
| DS | MOL007121 | miltipolone      | Estrogen receptor                                    | ER     |
| DS | MOL007121 | miltipolone      | Acetylcholinesterase                                 | ACHE   |
| DS | MOL007122 | Miltirone        | Prostaglandin G/H synthase 1                         | PTGS1  |
| DS | MOL007122 | Miltirone        | Dopamine D1 receptor                                 | DRD1   |
| DS | MOL007122 | Miltirone        | Muscarinic acetylcholine receptor M3                 | CHRM3  |
| DS | MOL007122 | Miltirone        | Muscarinic acetylcholine receptor M1                 | CHRM1  |
| DS | MOL007122 | Miltirone        | Estrogen receptor                                    | ER     |
| DS | MOL007122 | Miltirone        | Androgen receptor                                    | AR     |
| DS | MOL007122 | Miltirone        | D(1B) dopamine receptor                              | DRD1B  |
| DS | MOL007122 | Miltirone        | Sodium channel protein type 5 subunit alpha          | SCN5A  |
| DS | MOL007122 | Miltirone        | Muscarinic acetylcholine receptor M5                 | CHRM5  |
| DS | MOL007122 | Miltirone        | Prostaglandin G/H synthase 2                         | PTGS2  |
| DS | MOL007122 | Miltirone        | Nitric oxide synthase, endothelial                   | NOS3   |
| DS | MOL007122 | Miltirone        | Carbonic anhydrase 2                                 | CA2    |
| DS | MOL007122 | Miltirone        | Alpha-2C adrenergic receptor                         | ADRA2C |
| DS | MOL007122 | Miltirone        | Muscarinic acetylcholine receptor M4                 | CHRM4  |
| DS | MOL007122 | Miltirone        | Retinoic acid receptor RXR-alpha                     | RXRA   |
| DS | MOL007122 | Miltirone        | Delta-type opioid receptor                           | OPRD1  |

|    |           |                        |                                                      |        |
|----|-----------|------------------------|------------------------------------------------------|--------|
| DS | MOL007122 | Miltirone              | Alpha-1A adrenergic receptor                         | ADRA1A |
| DS | MOL007122 | Miltirone              | Muscarinic acetylcholine receptor M2                 | CHRM2  |
| DS | MOL007122 | Miltirone              | Alpha-1B adrenergic receptor                         | ADRA1B |
| DS | MOL007122 | Miltirone              | Sodium-dependent dopamine transporter                | SLC6A3 |
| DS | MOL007122 | Miltirone              | Beta-2 adrenergic receptor                           | ADRB2  |
| DS | MOL007122 | Miltirone              | Alpha-1D adrenergic receptor                         | ADRA1D |
| DS | MOL007122 | Miltirone              | DNA topoisomerase II                                 | TOP2   |
| DS | MOL007122 | Miltirone              | Mu-type opioid receptor                              | OPRM1  |
| DS | MOL007122 | Miltirone              | Neuronal acetylcholine receptor subunit              | CHRNA7 |
| DS | MOL007122 | Miltirone              | Nuclear receptor coactivator 2                       | NCOA2  |
| DS | MOL007124 | neocryptotanshinone    | Prostaglandin G/H synthase 1                         | PTGS1  |
| DS | MOL007124 | neocryptotanshinone    | Dopamine D1 receptor                                 | DRD1   |
| DS | MOL007124 | neocryptotanshinone    | Muscarinic acetylcholine receptor M3                 | CHRM3  |
| DS | MOL007124 | neocryptotanshinone    | Muscarinic acetylcholine receptor M1                 | CHRM1  |
| DS | MOL007124 | neocryptotanshinone    | Estrogen receptor                                    | ER     |
| DS | MOL007124 | neocryptotanshinone    | Androgen receptor                                    | AR     |
| DS | MOL007124 | neocryptotanshinone    | Sodium channel protein type 5 subunit alpha          | SCN5A  |
| DS | MOL007124 | neocryptotanshinone    | Prostaglandin G/H synthase 2                         | PTGS2  |
| DS | MOL007124 | neocryptotanshinone    | Nitric oxide synthase, endothelial                   | NOS3   |
| DS | MOL007124 | neocryptotanshinone    | Carbonic anhydrase 2                                 | CA2    |
| DS | MOL007124 | neocryptotanshinone    | Muscarinic acetylcholine receptor M4                 | CHRM4  |
| DS | MOL007124 | neocryptotanshinone    | Retinoic acid receptor RXR-alpha                     | RXRA   |
| DS | MOL007124 | neocryptotanshinone    | Delta-type opioid receptor                           | OPRD1  |
| DS | MOL007124 | neocryptotanshinone ii | CGMP-inhibited 3',5'-cyclic phosphodiesterase A      | PDE3A  |
| DS | MOL007124 | neocryptotanshinone    | Alpha-1A adrenergic receptor                         | ADRA1A |
| DS | MOL007124 | neocryptotanshinone    | Muscarinic acetylcholine receptor M2                 | CHRM2  |
| DS | MOL007124 | neocryptotanshinone    | Alpha-1B adrenergic receptor                         | ADRA1B |
| DS | MOL007124 | neocryptotanshinone    | Sodium-dependent dopamine transporter                | SLC6A3 |
| DS | MOL007124 | neocryptotanshinone    | Beta-2 adrenergic receptor                           | ADRB2  |
| DS | MOL007124 | neocryptotanshinone    | Alpha-1D adrenergic receptor                         | ADRA1D |
| DS | MOL007124 | neocryptotanshinone    | Sodium-dependent serotonin transporter               | SLC6A4 |
| DS | MOL007124 | neocryptotanshinone    | Mu-type opioid receptor                              | OPRM1  |
| DS | MOL007124 | neocryptotanshinone ii | Gamma-aminobutyric acid receptor subunit alpha-1     | GABRA1 |
| DS | MOL007124 | neocryptotanshinone    | Glycogen synthase kinase-3 beta                      | GSK3B  |
| DS | MOL007124 | neocryptotanshinone    | Heat shock protein HSP 90                            | HSP90  |
| DS | MOL007124 | neocryptotanshinone    | Cell division protein kinase 2                       | CDK2   |
| DS | MOL007124 | neocryptotanshinone    | Neuronal acetylcholine receptor subunit              | CHRNA7 |
| DS | MOL007124 | neocryptotanshinone ii | Proto-oncogene serine/threonine-protein kinase Pim-1 | PIM1   |
| DS | MOL007124 | neocryptotanshinone    | Cyclin-A2                                            | CCNA2  |
| DS | MOL007125 | neocryptotanshinone    | Prostaglandin G/H synthase 1                         | PTGS1  |
| DS | MOL007125 | neocryptotanshinone    | Muscarinic acetylcholine receptor M3                 | CHRM3  |
| DS | MOL007125 | neocryptotanshinone    | Muscarinic acetylcholine receptor M1                 | CHRM1  |
| DS | MOL007125 | neocryptotanshinone    | Sodium channel protein type 5 subunit alpha          | SCN5A  |
| DS | MOL007125 | neocryptotanshinone    | Peroxisome proliferator activated receptor gamma     | PPARG  |
| DS | MOL007125 | neocryptotanshinone    | Prostaglandin G/H synthase 2                         | PTGS2  |
| DS | MOL007125 | neocryptotanshinone    | Carbonic anhydrase 2                                 | CA2    |
| DS | MOL007125 | neocryptotanshinone    | Alpha-1B adrenergic receptor                         | ADRA1B |
| DS | MOL007125 | neocryptotanshinone    | Beta-2 adrenergic receptor                           | ADRB2  |
| DS | MOL007125 | neocryptotanshinone    | Alpha-1D adrenergic receptor                         | ADRA1D |
| DS | MOL007125 | neocryptotanshinone    | DNA topoisomerase II                                 | TOP2   |
| DS | MOL007125 | neocryptotanshinone    | Mu-type opioid receptor                              | OPRM1  |
| DS | MOL007125 | neocryptotanshinone    | Neuronal acetylcholine receptor subunit              | CHRNA7 |
| DS | MOL007125 | neocryptotanshinone    | Ig gamma-1 chain C region                            | IGHG1  |
| DS | MOL007125 | neocryptotanshinone    | Nuclear receptor coactivator 2                       | NCOA2  |
| DS | MOL007125 | neocryptotanshinone    | Nuclear receptor coactivator 1                       | NCOA1  |

|    |           |                                                                 |                                                  |        |
|----|-----------|-----------------------------------------------------------------|--------------------------------------------------|--------|
| DS | MOL007127 | 1-methyl-8,9-dihydro-7H-naphtho[5,6-g]benzofuran-6,10,11-trione | Prostaglandin G/H synthase 1                     | PTGS1  |
| DS | MOL007127 | 1-methyl-8,9-dihydro-7H-naphtho[5,6-g]benzofuran-6,10,11-trione | Dopamine D1 receptor                             | DRD1   |
| DS | MOL007127 | 1-methyl-8,9-dihydro-7H-naphtho[5,6-g]benzofuran-6,10,11-trione | Muscarinic acetylcholine receptor M3             | CHRM3  |
| DS | MOL007127 | 1-methyl-8,9-dihydro-7H-naphtho[5,6-g]benzofuran-6,10,11-trione | Thrombin                                         | F2     |
| DS | MOL007127 | 1-methyl-8,9-dihydro-7H-naphtho[5,6-g]benzofuran-6,10,11-trione | Sodium channel protein type 5 subunit alpha      | SCN5A  |
| DS | MOL007127 | 1-methyl-8,9-dihydro-7H-naphtho[5,6-g]benzofuran-6,10,11-trione | Muscarinic acetylcholine receptor M5             | CHRM5  |
| DS | MOL007127 | 1-methyl-8,9-dihydro-7H-naphtho[5,6-g]benzofuran-6,10,11-trione | Prostaglandin G/H synthase 2                     | PTGS2  |
| DS | MOL007127 | 1-methyl-8,9-dihydro-7H-naphtho[5,6-g]benzofuran-6,10,11-trione | Carbonic anhydrase 2                             | CA2    |
| DS | MOL007127 | 1-methyl-8,9-dihydro-7H-naphtho[5,6-g]benzofuran-6,10,11-trione | Retinoic acid receptor RXR-alpha                 | RXRA   |
| DS | MOL007127 | 1-methyl-8,9-dihydro-7H-naphtho[5,6-g]benzofuran-6,10,11-trione | Acetylcholinesterase                             | ACHE   |
| DS | MOL007127 | 1-methyl-8,9-dihydro-7H-naphtho[5,6-g]benzofuran-6,10,11-trione | Alpha-1A adrenergic receptor                     | ADRA1A |
| DS | MOL007127 | 1-methyl-8,9-dihydro-7H-naphtho[5,6-g]benzofuran-6,10,11-trione | Beta-2 adrenergic receptor                       | ADRB2  |
| DS | MOL007127 | 1-methyl-8,9-dihydro-7H-naphtho[5,6-g]benzofuran-6,10,11-trione | Mu-type opioid receptor                          | OPRM1  |
| DS | MOL007127 | 1-methyl-8,9-dihydro-7H-naphtho[5,6-g]benzofuran-6,10,11-trione | Gamma-aminobutyric acid receptor subunit alpha-1 | GABRA1 |
| DS | MOL007127 | 1-methyl-8,9-dihydro-7H-naphtho[5,6-g]benzofuran-6,10,11-trione | Dipeptidyl peptidase 4                           | DPP4   |

|    |           |                                                                                    |                                                                                 |        |
|----|-----------|------------------------------------------------------------------------------------|---------------------------------------------------------------------------------|--------|
| DS | MOL007127 | 1-methyl-8,9-dihydro-7H-naphtho[5,6-g]benzofuran-6,10,11-trione                    | Heat shock protein HSP 90                                                       | HSP90  |
| DS | MOL007127 | 1-methyl-8,9-dihydro-7H-naphtho[5,6-g]benzofuran-6,10,11-trione                    | Phosphatidylinositol-4,5-bisphosphate 3-kinase catalytic subunit, gamma isoform | PIK3CG |
| DS | MOL007127 | 1-methyl-8,9-dihydro-7H-naphtho[5,6-g]benzofuran-6,10,11-trione                    | Neuronal acetylcholine receptor subunit alpha-7                                 | CHRNA7 |
| DS | MOL007127 | 1-methyl-8,9-dihydro-7H-naphtho[5,6-g]benzofuran-6,10,11-trione                    | Ig gamma-1 chain C region                                                       | IGHG1  |
| DS | MOL007127 | 1-methyl-8,9-dihydro-7H-naphtho[5,6-g]benzofuran-6,10,11-trione                    | Nuclear receptor coactivator 1                                                  | NCOA1  |
| DS | MOL007130 | prolithospermic acid                                                               | Nitric oxide synthase, inducible                                                | NOS2   |
| DS | MOL007130 | prolithospermic acid                                                               | Prostaglandin G/H synthase 1                                                    | PTGS1  |
| DS | MOL007130 | prolithospermic acid                                                               | Thrombin                                                                        | F2     |
| DS | MOL007130 | prolithospermic acid                                                               | Estrogen receptor                                                               | ER     |
| DS | MOL007130 | prolithospermic acid                                                               | Androgen receptor                                                               | AR     |
| DS | MOL007130 | prolithospermic acid                                                               | Prostaglandin G/H synthase 2                                                    | PTGS2  |
| DS | MOL007130 | prolithospermic acid                                                               | mRNA of Protein-tyrosine phosphatase, non-receptor type 1                       | PTPN1  |
| DS | MOL007130 | prolithospermic acid                                                               | Heat shock protein HSP 90                                                       | HSP90  |
| DS | MOL007130 | prolithospermic acid                                                               | Trypsin-1                                                                       | TRY1   |
| DS | MOL007130 | prolithospermic acid                                                               | Calmodulin                                                                      | CALM   |
| DS | MOL007132 | (2R)-3-(3,4-dihydroxyphenyl)-2-[(Z)-3-(3,4-dihydroxyphenyl)acryloyl]propanoic acid | Thrombin                                                                        | F2     |
| DS | MOL007132 | (2R)-3-(3,4-dihydroxyphenyl)-2-[(Z)-3-(3,4-dihydroxyphenyl)acryloyl]propanoic acid | Estrogen receptor                                                               | ER     |
| DS | MOL007132 | (2R)-3-(3,4-dihydroxyphenyl)-2-[(Z)-3-(3,4-dihydroxyphenyl)acryloyl]propanoic acid | Androgen receptor                                                               | AR     |
| DS | MOL007132 | (2R)-3-(3,4-dihydroxyphenyl)-2-[(Z)-3-(3,4-dihydroxyphenyl)acryloyl]propanoic acid | Peroxisome proliferator activated receptor gamma                                | PPARG  |
| DS | MOL007132 | (2R)-3-(3,4-dihydroxyphenyl)-2-[(Z)-3-(3,4-dihydroxyphenyl)acryloyl]propanoic acid | Prostaglandin G/H synthase 2                                                    | PTGS2  |
| DS | MOL007132 | (2R)-3-(3,4-dihydroxyphenyl)-2-[(Z)-3-(3,4-dihydroxyphenyl)acryloyl]propanoic acid | Dipeptidyl peptidase 4                                                          | DPP4   |

|    |           |                                                                 |                                                           |        |
|----|-----------|-----------------------------------------------------------------|-----------------------------------------------------------|--------|
| DS | MOL007132 | (2R)-3-(3,4-dihydroxyphenyl)-2-[(Z)-3-(3,4-dihydroxyphenyl)acry | Trypsin-1                                                 | TRY1   |
| DS | MOL007132 | (2R)-3-(3,4-dihydroxyphenyl)-2-[(Z)-3-(3,4-dihydroxyphenyl)acry | Cyclin-A2                                                 | CCNA2  |
| DS | MOL007141 | salvianolic acid g                                              | Prostaglandin G/H synthase 2                              | PTGS2  |
| DS | MOL007142 | salvianolic acid j                                              | Coagulation factor VII                                    | F7     |
| DS | MOL007142 | salvianolic acid j                                              | mRNA of Protein-tyrosine phosphatase, non-receptor type 1 | PTPN1  |
| DS | MOL007142 | salvianolic acid j                                              | Trypsin-1                                                 | TRY1   |
| DS | MOL007143 | salvilenone l                                                   | Prostaglandin G/H synthase 2                              | PTGS2  |
| DS | MOL007143 | salvilenone l                                                   | Retinoic acid receptor RXR-alpha                          | RXRA   |
| DS | MOL007143 | salvilenone l                                                   | Acetylcholinesterase                                      | ACHE   |
| DS | MOL007143 | salvilenone l                                                   | Progesterone receptor                                     | PGR    |
| DS | MOL007143 | salvilenone l                                                   | mRNA of Protein-tyrosine phosphatase, non-receptor type 1 | PTPN1  |
| DS | MOL007143 | salvilenone l                                                   | Glucocorticoid receptor                                   | NR3C1  |
| DS | MOL007143 | salvilenone l                                                   | Nuclear receptor coactivator 2                            | NCOA2  |
| DS | MOL007143 | salvilenone l                                                   | Nuclear receptor coactivator 1                            | NCOA1  |
| DS | MOL007145 | salviolone                                                      | Prostaglandin G/H synthase 1                              | PTGS1  |
| DS | MOL007145 | salviolone                                                      | Dopamine D1 receptor                                      | DRD1   |
| DS | MOL007145 | salviolone                                                      | Muscarinic acetylcholine receptor M3                      | CHRM3  |
| DS | MOL007145 | salviolone                                                      | Thrombin                                                  | F2     |
| DS | MOL007145 | salviolone                                                      | Muscarinic acetylcholine receptor M1                      | CHRM1  |
| DS | MOL007145 | salviolone                                                      | D(1B) dopamine receptor                                   | DRD1B  |
| DS | MOL007145 | salviolone                                                      | Sodium channel protein type 5 subunit alpha               | SCN5A  |
| DS | MOL007145 | salviolone                                                      | Muscarinic acetylcholine receptor M5                      | CHRM5  |
| DS | MOL007145 | salviolone                                                      | Prostaglandin G/H synthase 2                              | PTGS2  |
| DS | MOL007145 | salviolone                                                      | Alpha-2A adrenergic receptor                              | ADRA2A |
| DS | MOL007145 | salviolone                                                      | 5-hydroxytryptamine receptor 1A                           | HTR1A  |
| DS | MOL007145 | salviolone                                                      | 5-hydroxytryptamine receptor 3A                           | HTR3A  |
| DS | MOL007145 | salviolone                                                      | Gamma-aminobutyric acid receptor subunit alpha-2          | GABRA2 |
| DS | MOL007145 | salviolone                                                      | Muscarinic acetylcholine receptor M4                      | CHRM4  |
| DS | MOL007145 | salviolone                                                      | Delta-type opioid receptor                                | OPRD1  |
| DS | MOL007145 | salviolone                                                      | Acetylcholinesterase                                      | ACHE   |
| DS | MOL007145 | salviolone                                                      | CGMP-inhibited 3',5'-cyclic phosphodiesterase A           | PDE3A  |
| DS | MOL007145 | salviolone                                                      | 5-hydroxytryptamine 2A receptor                           | HTR2A  |
| DS | MOL007145 | salviolone                                                      | Gamma-aminobutyric acid receptor subunit alpha-5          | GABRA5 |
| DS | MOL007145 | salviolone                                                      | Sodium-dependent noradrenaline transporter                | SLC6A2 |
| DS | MOL007145 | salviolone                                                      | Alpha-1A adrenergic receptor                              | ADRA1A |
| DS | MOL007145 | salviolone                                                      | Gamma-aminobutyric acid receptor subunit alpha-3          | GABRA3 |
| DS | MOL007145 | salviolone                                                      | 5-hydroxytryptamine receptor 2C                           | HTR2C  |
| DS | MOL007145 | salviolone                                                      | Muscarinic acetylcholine receptor M2                      | CHRM2  |
| DS | MOL007145 | salviolone                                                      | Alpha-2B adrenergic receptor                              | ADRA2B |
| DS | MOL007145 | salviolone                                                      | Alpha-1B adrenergic receptor                              | ADRA1B |
| DS | MOL007145 | salviolone                                                      | Sodium-dependent dopamine transporter                     | SLC6A3 |
| DS | MOL007145 | salviolone                                                      | Beta-2 adrenergic receptor                                | ADRB2  |
| DS | MOL007145 | salviolone                                                      | Neuronal acetylcholine receptor subunit                   | CHRNA2 |
| DS | MOL007145 | salviolone                                                      | Sodium-dependent serotonin transporter                    | SLC6A4 |
| DS | MOL007145 | salviolone                                                      | D(2) dopamine receptor                                    | DRD2   |
| DS | MOL007145 | salviolone                                                      | Mu-type opioid receptor                                   | OPRM1  |



|    |           |                                                                                   |                                                     |        |
|----|-----------|-----------------------------------------------------------------------------------|-----------------------------------------------------|--------|
| DS | MOL007145 | salviolone                                                                        | Gamma-aminobutyric acid receptor subunit<br>alpha-1 | GABRA1 |
| DS | MOL007145 | salviolone                                                                        | 5-hydroxytryptamine receptor 1B                     | HTR1B  |
| DS | MOL007145 | salviolone                                                                        | Neuronal acetylcholine receptor subunit             | CHRNA7 |
| DS | MOL007145 | salviolone                                                                        | Gamma-aminobutyric acid receptor subunit<br>alpha-6 | GABRA6 |
| DS | MOL007145 | salviolone                                                                        | Gamma-aminobutyric acid receptor subunit<br>gamma-3 | GABRG3 |
| DS | MOL007145 | salviolone                                                                        | Gamma-aminobutyric acid receptor subunit<br>epsilon | GABRE  |
| DS | MOL007150 | (6S)-6-hydroxy-1-methyl-6-methylol-8,9-dihydro-7H-naphtho[8,7-g]benzofuran-10,11- | Thrombin                                            | F2     |
| DS | MOL007150 | (6S)-6-hydroxy-1-methyl-6-methylol-8,9-dihydro-7H-naphtho[8,7-g]benzofuran-10,11- | Prostaglandin G/H synthase 2                        | PTGS2  |
| DS | MOL007150 | (6S)-6-hydroxy-1-methyl-6-methylol-8,9-dihydro-7H-naphtho[8,7-g]benzofuran-10,11- | Carbonic anhydrase 2                                | CA2    |
| DS | MOL007150 | (6S)-6-hydroxy-1-methyl-6-methylol-8,9-dihydro-7H-naphtho[8,7-g]benzofuran-10,11- | Acetylcholinesterase                                | ACHE   |
| DS | MOL007150 | (6S)-6-hydroxy-1-methyl-6-methylol-8,9-dihydro-7H-naphtho[8,7-g]benzofuran-10,11- | Dipeptidyl peptidase 4                              | DPP4   |
| DS | MOL007150 | (6S)-6-hydroxy-1-methyl-6-methylol-8,9-dihydro-7H-naphtho[8,7-g]benzofuran-10,11- | Heat shock protein HSP 90                           | HSP90  |
| DS | MOL007150 | (6S)-6-hydroxy-1-methyl-6-methylol-8,9-dihydro-7H-naphtho[8,7-g]benzofuran-10,11- | Trypsin-1                                           | TRY1   |
| DS | MOL007150 | (6S)-6-hydroxy-1-methyl-6-methylol-8,9-dihydro-7H-naphtho[8,7-g]benzofuran-10,11- | Nuclear receptor coactivator 1                      | NCOA1  |
| DS | MOL007151 | Tanshindiol B                                                                     | Thrombin                                            | F2     |
| DS | MOL007151 | Tanshindiol B                                                                     | Prostaglandin G/H synthase 2                        | PTGS2  |
| DS | MOL007151 | Tanshindiol B                                                                     | Carbonic anhydrase 2                                | CA2    |
| DS | MOL007151 | Tanshindiol B                                                                     | Acetylcholinesterase                                | ACHE   |

|    |           |                                                                                    |                                                         |        |
|----|-----------|------------------------------------------------------------------------------------|---------------------------------------------------------|--------|
| DS | MOL007151 | Tanshindiol B                                                                      | Dipeptidyl peptidase 4                                  | DPP4   |
| DS | MOL007151 | Tanshindiol B                                                                      | Heat shock protein HSP 90                               | HSP90  |
| DS | MOL007151 | Tanshindiol B                                                                      | Nuclear receptor coactivator 1                          | NCOA1  |
| DS | MOL007152 | Przewaquinone E                                                                    | Thrombin                                                | F2     |
| DS | MOL007152 | Przewaquinone E                                                                    | Prostaglandin G/H synthase 2                            | PTGS2  |
| DS | MOL007152 | Przewaquinone E                                                                    | Carbonic anhydrase 2                                    | CA2    |
| DS | MOL007152 | Przewaquinone E                                                                    | Acetylcholinesterase                                    | ACHE   |
| DS | MOL007152 | Przewaquinone E                                                                    | Dipeptidyl peptidase 4                                  | DPP4   |
| DS | MOL007152 | Przewaquinone E                                                                    | Heat shock protein HSP 90                               | HSP90  |
| DS | MOL007152 | Przewaquinone E                                                                    | Nuclear receptor coactivator 1                          | NCOA1  |
| DS | MOL007154 | tanshinone iia                                                                     | Dopamine D1 receptor                                    | DRD1   |
| DS | MOL007154 | tanshinone iia                                                                     | Muscarinic acetylcholine receptor M3                    | CHRM3  |
| DS | MOL007154 | tanshinone iia                                                                     | Thrombin                                                | F2     |
| DS | MOL007154 | tanshinone iia                                                                     | Muscarinic acetylcholine receptor M1                    | CHRM1  |
| DS | MOL007154 | tanshinone iia                                                                     | Sodium channel protein type 5 subunit alpha             | SCN5A  |
| DS | MOL007154 | tanshinone iia                                                                     | Muscarinic acetylcholine receptor M5                    | CHRM5  |
| DS | MOL007154 | tanshinone iia                                                                     | Prostaglandin G/H synthase 2                            | PTGS2  |
| DS | MOL007154 | tanshinone iia                                                                     | Muscarinic acetylcholine receptor M4                    | CHRM4  |
| DS | MOL007154 | tanshinone iia                                                                     | Delta-type opioid receptor                              | OPRD1  |
| DS | MOL007154 | tanshinone iia                                                                     | Acetylcholinesterase                                    | ACHE   |
| DS | MOL007154 | tanshinone iia                                                                     | Alpha-1A adrenergic receptor                            | ADRA1A |
| DS | MOL007154 | tanshinone iia                                                                     | Muscarinic acetylcholine receptor M2                    | CHRM2  |
| DS | MOL007154 | tanshinone iia                                                                     | Beta-2 adrenergic receptor                              | ADRB2  |
| DS | MOL007154 | tanshinone iia                                                                     | Mu-type opioid receptor                                 | OPRM1  |
| DS | MOL007154 | tanshinone iia                                                                     | Dipeptidyl peptidase 4                                  | DPP4   |
| DS | MOL007154 | tanshinone iia                                                                     | Neuronal acetylcholine receptor subunit                 | CHRNA7 |
| DS | MOL007154 | tanshinone iia                                                                     | Nuclear receptor coactivator 1                          | NCOA1  |
| DS | MOL007154 | tanshinone iia                                                                     | Retinoic acid receptor RXR-alpha                        | RXRA   |
| DS | MOL007154 | tanshinone iia                                                                     | Transcription factor p65                                | RELA   |
| DS | MOL007154 | tanshinone iia                                                                     | Apoptosis regulator Bcl-2                               | BCL2   |
| DS | MOL007154 | tanshinone iia                                                                     | Proto-oncogene c-Fos                                    | FOS    |
| DS | MOL007154 | tanshinone iia                                                                     | Cyclin-dependent kinase inhibitor 1                     | CDKN1A |
| DS | MOL007154 | tanshinone iia                                                                     | Matrix metalloproteinase-9                              | MMP9   |
| DS | MOL007154 | tanshinone iia                                                                     | Transcription factor AP-1                               | TFAP1  |
| DS | MOL007154 | tanshinone iia                                                                     | Activator of 90 kDa heat shock protein ATPase homolog 1 | AHSA1  |
| DS | MOL007154 | tanshinone iia                                                                     | Caspase-3                                               | CASP3  |
| DS | MOL007154 | tanshinone iia                                                                     | Cellular tumor antigen p53                              | TP53   |
| DS | MOL007154 | tanshinone iia                                                                     | NF-kappa-B inhibitor alpha                              | NFKBIA |
| DS | MOL007154 | tanshinone iia                                                                     | Fatty acid synthase                                     | FASN   |
| DS | MOL007154 | tanshinone iia                                                                     | Endothelin-1 receptor                                   | EDNRA  |
| DS | MOL007154 | tanshinone iia                                                                     | Endothelin-1                                            | EDN1   |
| DS | MOL007154 | tanshinone iia                                                                     | Cytochrome P450 3A4                                     | CYP3A4 |
| DS | MOL007154 | tanshinone iia                                                                     | Cytochrome P450 1A2                                     | CYP1A2 |
| DS | MOL007154 | tanshinone iia                                                                     | Myc proto-oncogene protein                              | MYC    |
| DS | MOL007154 | tanshinone iia                                                                     | Cytochrome P450 1A1                                     | CYP1A1 |
| DS | MOL007154 | tanshinone iia                                                                     | Nuclear receptor subfamily 1 group I member             | NR1I2  |
| DS | MOL007154 | tanshinone iia                                                                     | Nucleophosmin                                           | NPM1   |
| DS | MOL007154 | tanshinone iia                                                                     | Endothelin-converting enzyme 1                          | ECE1   |
| DS | MOL007154 | tanshinone iia                                                                     | Poly [ADP-ribose] polymerase 4                          | PARP4  |
| DS | MOL007154 | tanshinone iia                                                                     | Calcitonin receptor                                     | CALCR  |
| DS | MOL007154 | tanshinone iia                                                                     | Integrin beta-3                                         | ITGB3  |
| DS | MOL007155 | (6S)-6-(hydroxymethyl)-1,6-dimethyl-8,9-dihydro-7H-naphtho[8,7-g]benzofuran-10,11- | Thrombin                                                | F2     |

|    |           |                                                                                    |                                                 |        |
|----|-----------|------------------------------------------------------------------------------------|-------------------------------------------------|--------|
| DS | MOL007155 | (6S)-6-(hydroxymethyl)-1,6-dimethyl-8,9-dihydro-7H-naphtho[8,7-g]benzofuran-10,11- | Muscarinic acetylcholine receptor M1            | CHRM1  |
| DS | MOL007155 | (6S)-6-(hydroxymethyl)-1,6-dimethyl-8,9-dihydro-7H-naphtho[8,7-g]benzofuran-10,11- | Sodium channel protein type 5 subunit alpha     | SCN5A  |
| DS | MOL007155 | (6S)-6-(hydroxymethyl)-1,6-dimethyl-8,9-dihydro-7H-naphtho[8,7-g]benzofuran-10,11- | Prostaglandin G/H synthase 2                    | PTGS2  |
| DS | MOL007155 | (6S)-6-(hydroxymethyl)-1,6-dimethyl-8,9-dihydro-7H-naphtho[8,7-g]benzofuran-10,11- | Delta-type opioid receptor                      | OPRD1  |
| DS | MOL007155 | (6S)-6-(hydroxymethyl)-1,6-dimethyl-8,9-dihydro-7H-naphtho[8,7-g]benzofuran-10,11- | Acetylcholinesterase                            | ACHE   |
| DS | MOL007155 | (6S)-6-(hydroxymethyl)-1,6-dimethyl-8,9-dihydro-7H-naphtho[8,7-g]benzofuran-10,11- | Alpha-1A adrenergic receptor                    | ADRA1A |
| DS | MOL007155 | (6S)-6-(hydroxymethyl)-1,6-dimethyl-8,9-dihydro-7H-naphtho[8,7-g]benzofuran-10,11- | Beta-2 adrenergic receptor                      | ADRB2  |
| DS | MOL007155 | (6S)-6-(hydroxymethyl)-1,6-dimethyl-8,9-dihydro-7H-naphtho[8,7-g]benzofuran-10,11- | Mu-type opioid receptor                         | OPRM1  |
| DS | MOL007155 | (6S)-6-(hydroxymethyl)-1,6-dimethyl-8,9-dihydro-7H-naphtho[8,7-g]benzofuran-10,11- | Dipeptidyl peptidase 4                          | DPP4   |
| DS | MOL007155 | (6S)-6-(hydroxymethyl)-1,6-dimethyl-8,9-dihydro-7H-naphtho[8,7-g]benzofuran-10,11- | Neuronal acetylcholine receptor subunit alpha-7 | CHRNA7 |

|    |           |                                                                                                    |                                                                                 |        |
|----|-----------|----------------------------------------------------------------------------------------------------|---------------------------------------------------------------------------------|--------|
| DS | MOL007155 | (6S)-6-(hydroxymethyl)-1,6-dimethyl-8,9-dihydro-7H-naphtho[8,7-g]benzofuran-10,11-                 | Trypsin-1                                                                       | TRY1   |
| DS | MOL007155 | (6S)-6-(hydroxymethyl)-1,6-dimethyl-8,9-dihydro-7H-naphtho[8,7-g]benzofuran-10,11-                 | Nuclear receptor coactivator 1                                                  | NCOA1  |
| DS | MOL007156 | tanshinone VI                                                                                      | Prostaglandin G/H synthase 1                                                    | PTGS1  |
| DS | MOL007156 | tanshinone VI                                                                                      | Estrogen receptor                                                               | ER     |
| DS | MOL007156 | tanshinone VI                                                                                      | Androgen receptor                                                               | AR     |
| DS | MOL007156 | tanshinone VI                                                                                      | Sodium channel protein type 5 subunit alpha                                     | SCN5A  |
| DS | MOL007156 | tanshinone VI                                                                                      | Peroxisome proliferator activated receptor gamma                                | PPARG  |
| DS | MOL007156 | tanshinone VI                                                                                      | Coagulation factor X                                                            | F10    |
| DS | MOL007156 | tanshinone VI                                                                                      | Prostaglandin G/H synthase 2                                                    | PTGS2  |
| DS | MOL007156 | tanshinone VI                                                                                      | Heat shock protein HSP 90                                                       | HSP90  |
| DS | MOL007156 | tanshinone VI                                                                                      | Beta-lactamase                                                                  | BLAC   |
| DS | MOL007156 | tanshinone VI                                                                                      | Ig gamma-1 chain C region                                                       | IGHG1  |
| DS | MOL007156 | tanshinone VI                                                                                      | Nuclear receptor coactivator 2                                                  | NCOA2  |
| DS | MOL007156 | tanshinone VI                                                                                      | Nuclear receptor coactivator 1                                                  | NCOA1  |
| DS | MOL007156 | tanshinone VI                                                                                      | Calmodulin                                                                      | CALM   |
| HH | MOL002712 | 6-Hydroxykaempferol                                                                                | Nitric oxide synthase, inducible                                                | NOS2   |
| HH | MOL002712 | 6-Hydroxykaempferol                                                                                | Prostaglandin G/H synthase 1                                                    | PTGS1  |
| HH | MOL002712 | 6-Hydroxykaempferol                                                                                | Androgen receptor                                                               | AR     |
| HH | MOL002712 | 6-Hydroxykaempferol                                                                                | Peroxisome proliferator activated receptor gamma                                | PPARG  |
| HH | MOL002712 | 6-Hydroxykaempferol                                                                                | Prostaglandin G/H synthase 2                                                    | PTGS2  |
| HH | MOL002712 | 6-Hydroxykaempferol                                                                                | Heat shock protein HSP 90                                                       | HSP90  |
| HH | MOL002712 | 6-Hydroxykaempferol                                                                                | Phosphatidylinositol-4,5-bisphosphate 3-kinase catalytic subunit, gamma isoform | PIK3CG |
| HH | MOL002712 | 6-Hydroxykaempferol                                                                                | Trypsin-1                                                                       | TRY1   |
| HH | MOL002712 | 6-Hydroxykaempferol                                                                                | Nuclear receptor coactivator 2                                                  | NCOA2  |
| HH | MOL002712 | 6-Hydroxykaempferol                                                                                | Dipeptidyl peptidase IV                                                         | DPP4   |
| HH | MOL002717 | qt carthamone                                                                                      | Prostaglandin G/H synthase 1                                                    | PTGS1  |
| HH | MOL002717 | qt carthamone                                                                                      | Prostaglandin G/H synthase 2                                                    | PTGS2  |
| HH | MOL002717 | qt carthamone                                                                                      | Heat shock protein HSP 90                                                       | HSP90  |
| HH | MOL002694 | 4-[(E)-4-(3,5-dimethoxy-4-oxo-1-cyclohexa-2,5-dienylidene)but-2-enylidene]-2,6-dimethoxycyclohexa- | Thrombin                                                                        | F2     |
| HH | MOL002694 | 4-[(E)-4-(3,5-dimethoxy-4-oxo-1-cyclohexa-2,5-dienylidene)but-2-enylidene]-2,6-dimethoxycyclohexa- | Prostaglandin G/H synthase 2                                                    | PTGS2  |

|    |           |                                                                                                    |                                                                                 |        |
|----|-----------|----------------------------------------------------------------------------------------------------|---------------------------------------------------------------------------------|--------|
| HH | MOL002694 | 4-[(E)-4-(3,5-dimethoxy-4-oxo-1-cyclohexa-2,5-dienylidene)but-2-enylidene]-2,6-dimethoxycyclohexa- | Nuclear receptor coactivator 2                                                  | NCOA2  |
| HH | MOL002710 | Pyrethrin II                                                                                       | Prostaglandin G/H synthase 2                                                    | PTGS2  |
| HH | MOL002710 | Pyrethrin II                                                                                       | Nuclear receptor coactivator 2                                                  | NCOA2  |
| HH | MOL000098 | quercetin                                                                                          | Prostaglandin G/H synthase 1                                                    | PTGS1  |
| HH | MOL000098 | quercetin                                                                                          | Androgen receptor                                                               | AR     |
| HH | MOL000098 | quercetin                                                                                          | Peroxisome proliferator activated receptor gamma                                | PPARG  |
| HH | MOL000098 | quercetin                                                                                          | Prostaglandin G/H synthase 2                                                    | PTGS2  |
| HH | MOL000098 | quercetin                                                                                          | Heat shock protein HSP 90                                                       | HSP90  |
| HH | MOL000098 | quercetin                                                                                          | Phosphatidylinositol-4,5-bisphosphate 3-kinase catalytic subunit, gamma isoform | PIK3CG |
| HH | MOL000098 | quercetin                                                                                          | Nuclear receptor coactivator 2                                                  | NCOA2  |
| HH | MOL000098 | quercetin                                                                                          | Dipeptidyl peptidase 4                                                          | DPP4   |
| HH | MOL000098 | quercetin                                                                                          | Aldose reductase                                                                | AR     |
| HH | MOL000098 | quercetin                                                                                          | Trypsin-1                                                                       | TRY1   |
| HH | MOL000098 | quercetin                                                                                          | DNA topoisomerase II                                                            | TOP2   |
| HH | MOL000098 | quercetin                                                                                          | Thrombin                                                                        | F2     |
| HH | MOL000098 | quercetin                                                                                          | Potassium voltage-gated channel subfamily H member 2                            | KCNH2  |
| HH | MOL000098 | quercetin                                                                                          | Sodium channel protein type 5 subunit alpha                                     | SCN5A  |
| HH | MOL000098 | quercetin                                                                                          | Coagulation factor X                                                            | F10    |
| HH | MOL000098 | quercetin                                                                                          | Beta-2 adrenergic receptor                                                      | ADRB2  |
| HH | MOL000098 | quercetin                                                                                          | Stromelysin-1                                                                   | MMP3   |
| HH | MOL000098 | quercetin                                                                                          | mRNA of PKA Catalytic Subunit C-alpha                                           | PRKACA |
| HH | MOL000098 | quercetin                                                                                          | Coagulation factor VII                                                          | F7     |
| HH | MOL000098 | quercetin                                                                                          | Nitric oxide synthase, endothelial                                              | NOS3   |
| HH | MOL000098 | quercetin                                                                                          | Retinoic acid receptor RXR-alpha                                                | RXRA   |
| HH | MOL000098 | quercetin                                                                                          | Acetylcholinesterase                                                            | ACHE   |
| HH | MOL000098 | quercetin                                                                                          | Gamma-aminobutyric acid receptor subunit alpha-1                                | GABRA1 |
| HH | MOL000098 | quercetin                                                                                          | Amine oxidase [flavin-containing] B                                             | MAOB   |
| HH | MOL000098 | quercetin                                                                                          | Transcription factor p65                                                        | RELA   |
| HH | MOL000098 | quercetin                                                                                          | Epidermal growth factor receptor                                                | EGFR   |
| HH | MOL000098 | quercetin                                                                                          | RAC-alpha serine/threonine-protein kinase                                       | AKT1   |
| HH | MOL000098 | quercetin                                                                                          | Vascular endothelial growth factor A                                            | VEGFA  |
| HH | MOL000098 | quercetin                                                                                          | G1/S-specific cyclin-D1                                                         | CCND1  |
| HH | MOL000098 | quercetin                                                                                          | Apoptosis regulator Bcl-2                                                       | BCL2   |
| HH | MOL000098 | quercetin                                                                                          | Bcl-2-like protein 1                                                            | BCL2L1 |
| HH | MOL000098 | quercetin                                                                                          | Proto-oncogene c-Fos                                                            | FOS    |
| HH | MOL000098 | quercetin                                                                                          | Cyclin-dependent kinase inhibitor 1                                             | CDKN1A |
| HH | MOL000098 | quercetin                                                                                          | Eukaryotic translation initiation factor 6                                      | EIF6   |
| HH | MOL000098 | quercetin                                                                                          | Apoptosis regulator BAX                                                         | BAX    |
| HH | MOL000098 | quercetin                                                                                          | Caspase-9                                                                       | CASP9  |
| HH | MOL000098 | quercetin                                                                                          | Urokinase-type plasminogen activator                                            | PLAU   |
| HH | MOL000098 | quercetin                                                                                          | 72 kDa type IV collagenase                                                      | MMP2   |
| HH | MOL000098 | quercetin                                                                                          | Matrix metalloproteinase-9                                                      | MMP9   |
| HH | MOL000098 | quercetin                                                                                          | Mitogen-activated protein kinase 1                                              | MAPK1  |
| HH | MOL000098 | quercetin                                                                                          | Interleukin-10                                                                  | IL10   |
| HH | MOL000098 | quercetin                                                                                          | Pro-epidermal growth factor                                                     | EGF    |
| HH | MOL000098 | quercetin                                                                                          | Retinoblastoma-associated protein                                               | RB1    |
| HH | MOL000098 | quercetin                                                                                          | Tumor necrosis factor                                                           | TNF    |
| HH | MOL000098 | quercetin                                                                                          | Transcription factor AP-1                                                       | TFAP1  |
| HH | MOL000098 | quercetin                                                                                          | Interleukin-6                                                                   | IL6    |

|    |           |           |                                                               |          |
|----|-----------|-----------|---------------------------------------------------------------|----------|
| HH | MOL000098 | quercetin | Cyclin-dependent kinase inhibitor 2A                          | CDKN2A   |
| HH | MOL000098 | quercetin | Activator of 90 kDa heat shock protein ATPase homolog 1       | AHSA1    |
| HH | MOL000098 | quercetin | Caspase-3                                                     | CASP3    |
| HH | MOL000098 | quercetin | Cellular tumor antigen p53                                    | TP53     |
| HH | MOL000098 | quercetin | ETS domain-containing protein Elk-1                           | ELK1     |
| HH | MOL000098 | quercetin | NF-kappa-B inhibitor alpha                                    | NFKBIA   |
| HH | MOL000098 | quercetin | NADPH--cytochrome P450 reductase                              | POR      |
| HH | MOL000098 | quercetin | Ornithine decarboxylase                                       | ODC1     |
| HH | MOL000098 | quercetin | Xanthine dehydrogenase/oxidase                                | XDH      |
| HH | MOL000098 | quercetin | Caspase-8                                                     | CASP8    |
| HH | MOL000098 | quercetin | DNA topoisomerase 1                                           | TOP1     |
| HH | MOL000098 | quercetin | RAF proto-oncogene serine/threonine-protein kinase            | RAF1     |
| HH | MOL000098 | quercetin | Superoxide dismutase [Cu-Zn]                                  | SOD1     |
| HH | MOL000098 | quercetin | Protein kinase C alpha type                                   | PRKCA    |
| HH | MOL000098 | quercetin | Interstitial collagenase                                      | MMP1     |
| HH | MOL000098 | quercetin | Hypoxia-inducible factor 1-alpha                              | HIF1A    |
| HH | MOL000098 | quercetin | Signal transducer and activator of transcription 1-alpha/beta | STAT1    |
| HH | MOL000098 | quercetin | Protein CBFA2T1                                               | RUNX1T1  |
| HH | MOL000098 | quercetin | Probable E3 ubiquitin-protein ligase HERC5                    | HERC5    |
| HH | MOL000098 | quercetin | Cell division control protein 2 homolog                       | CDK2     |
| HH | MOL000098 | quercetin | 78 kDa glucose-regulated protein                              | GRP78    |
| HH | MOL000098 | quercetin | Receptor tyrosine-protein kinase erbB-2                       | ERBB2    |
| HH | MOL000098 | quercetin | Peroxisome proliferator-activated receptor gamma              | PPARG    |
| HH | MOL000098 | quercetin | Acetyl-CoA carboxylase 1                                      | ACACA    |
| HH | MOL000098 | quercetin | Heme oxygenase 1                                              | HMOX1    |
| HH | MOL000098 | quercetin | Cytochrome P450 3A4                                           | CYP3A4   |
| HH | MOL000098 | quercetin | Cytochrome P450 1A2                                           | CYP1A2   |
| HH | MOL000098 | quercetin | Caveolin-1                                                    | CAV1     |
| HH | MOL000098 | quercetin | Myc proto-oncogene protein                                    | MYC      |
| HH | MOL000098 | quercetin | Tissue factor                                                 | F3       |
| HH | MOL000098 | quercetin | Gap junction alpha-1 protein                                  | GJA1     |
| HH | MOL000098 | quercetin | Cytochrome P450 1A1                                           | CYP1A1   |
| HH | MOL000098 | quercetin | Intercellular adhesion molecule 1                             | ICAM1    |
| HH | MOL000098 | quercetin | Interleukin-1 beta                                            | IL1B     |
| HH | MOL000098 | quercetin | C-C motif chemokine 2                                         | CCL2     |
| HH | MOL000098 | quercetin | E-selectin                                                    | SELE     |
| HH | MOL000098 | quercetin | Vascular cell adhesion protein 1                              | VCAM1    |
| HH | MOL000098 | quercetin | Prostaglandin E2 receptor EP3 subtype                         | PTGER3   |
| HH | MOL000098 | quercetin | Interleukin-8                                                 | CXCL8    |
| HH | MOL000098 | quercetin | Protein kinase C beta type                                    | PRKCB    |
| HH | MOL000098 | quercetin | Baculoviral IAP repeat-containing protein 5                   | BIRC5    |
| HH | MOL000098 | quercetin | Dual oxidase 2                                                | DUOX2    |
| HH | MOL000098 | quercetin | Heat shock protein beta-1                                     | HSPB1    |
| HH | MOL000098 | quercetin | Transforming growth factor beta-1 proprotein                  | TGFB1    |
| HH | MOL000098 | quercetin | Estrogen sulfotransferase                                     | STE      |
| HH | MOL000098 | quercetin | Maltase-glucoamylase, intestinal                              | MGAM     |
| HH | MOL000098 | quercetin | Interleukin-2                                                 | IL2      |
| HH | MOL000098 | quercetin | Nuclear receptor subfamily 1 group I member                   | NR1I2    |
| HH | MOL000098 | quercetin | Cytochrome P450 1B1                                           | CYP1B1   |
| HH | MOL000098 | quercetin | G2/mitotic-specific cyclin-B1                                 | CCNB1    |
| HH | MOL000098 | quercetin | Tissue-type plasminogen activator                             | PLAT     |
| HH | MOL000098 | quercetin | Thrombomodulin                                                | THBD     |
| HH | MOL000098 | quercetin | Plasminogen activator inhibitor 1                             | SERPINE1 |
| HH | MOL000098 | quercetin | Collagen alpha-1(I) chain                                     | COL1A1   |
| HH | MOL000098 | quercetin | Interferon gamma                                              | IFNG     |

|    |           |           |                                                                                                      |        |
|----|-----------|-----------|------------------------------------------------------------------------------------------------------|--------|
| HH | MOL000098 | quercetin | Arachidonate 5-lipoxygenase                                                                          | ALOX5  |
| HH | MOL000098 | quercetin | Phosphatidylinositol-3,4,5-trisphosphate 3-phosphatase and dual-specificity protein phosphatase PTEN | PTEN   |
| HH | MOL000098 | quercetin | Interleukin-1 alpha                                                                                  | IL1A   |
| HH | MOL000098 | quercetin | Myeloperoxidase                                                                                      | MPO    |
| HH | MOL000098 | quercetin | DNA topoisomerase 2-alpha                                                                            | TOP2A  |
| HH | MOL000098 | quercetin | Neutrophil cytosol factor 1                                                                          | NCF1   |
| HH | MOL000098 | quercetin | ATP-binding cassette sub-family G member 2                                                           | ABCG2  |
| HH | MOL000098 | quercetin | Hyaluronan synthase 2                                                                                | HAS2   |
| HH | MOL000098 | quercetin | Glutathione S-transferase P                                                                          | GSTP1  |
| HH | MOL000098 | quercetin | Nuclear factor erythroid 2-related factor 2                                                          | NFE2L2 |
| HH | MOL000098 | quercetin | NAD(P)H dehydrogenase [quinone] 1                                                                    | NQO1   |
| HH | MOL000098 | quercetin | Poly [ADP-ribose] polymerase 1                                                                       | PARP1  |
| HH | MOL000098 | quercetin | Aryl hydrocarbon receptor                                                                            | AHR    |
| HH | MOL000098 | quercetin | 26S proteasome non-ATPase regulatory subunit 3                                                       | PSMD3  |
| HH | MOL000098 | quercetin | Solute carrier family 2, facilitated glucose transporter member 4                                    | SLC2A4 |
| HH | MOL000098 | quercetin | Collagen alpha-1(III) chain                                                                          | COL3A1 |
| HH | MOL000098 | quercetin | DNA gyrase subunit B                                                                                 | GRYB   |
| HH | MOL000098 | quercetin | C-X-C motif chemokine 11                                                                             | CXCL11 |
| HH | MOL000098 | quercetin | C-X-C motif chemokine 2                                                                              | CXCL2  |
| HH | MOL000098 | quercetin | DDB1- and CUL4-associated factor 5                                                                   | DCAF5  |
| HH | MOL000098 | quercetin | Nuclear receptor subfamily 1 group I member                                                          | NR1I3  |
| HH | MOL000098 | quercetin | Serine/threonine-protein kinase Chk2                                                                 | CHEK2  |
| HH | MOL000098 | quercetin | Insulin receptor                                                                                     | INSR   |
| HH | MOL000098 | quercetin | Claudin-4                                                                                            | CLDN4  |
| HH | MOL000098 | quercetin | Peroxisome proliferator-activated receptor                                                           | PPARA  |
| HH | MOL000098 | quercetin | Peroxisome proliferator-activated receptor                                                           | PPARD  |
| HH | MOL000098 | quercetin | Heat shock factor protein 1                                                                          | HSF1   |
| HH | MOL000098 | quercetin | C-reactive protein                                                                                   | CRP    |
| HH | MOL000098 | quercetin | C-X-C motif chemokine 10                                                                             | CXCL10 |
| HH | MOL000098 | quercetin | Inhibitor of nuclear factor kappa-B kinase subunit alpha                                             | CHUK   |
| HH | MOL000098 | quercetin | Osteopontin                                                                                          | SPP1   |
| HH | MOL000098 | quercetin | Runt-related transcription factor 2                                                                  | RUNX2  |
| HH | MOL000098 | quercetin | Ras association domain-containing protein 1                                                          | RASSF1 |
| HH | MOL000098 | quercetin | Transcription factor E2F1                                                                            | E2F1   |
| HH | MOL000098 | quercetin | Transcription factor E2F2                                                                            | E2F2   |
| HH | MOL000098 | quercetin | Prostatic acid phosphatase                                                                           | ACP3   |
| HH | MOL000098 | quercetin | Cathepsin D                                                                                          | CTSD   |
| HH | MOL000098 | quercetin | Insulin-like growth factor-binding protein 3                                                         | IGFBP3 |
| HH | MOL000098 | quercetin | Insulin-like growth factor II                                                                        | IGF2   |
| HH | MOL000098 | quercetin | CD40 ligand                                                                                          | CD40LG |
| HH | MOL000098 | quercetin | Interferon regulatory factor 1                                                                       | IRF1   |
| HH | MOL000098 | quercetin | Receptor tyrosine-protein kinase erbB-3                                                              | ERBB3  |
| HH | MOL000098 | quercetin | Serum paraoxonase/arylesterase 1                                                                     | PON1   |
| HH | MOL000098 | quercetin | Type I iodothyronine deiodinase                                                                      | DIO1   |
| HH | MOL000098 | quercetin | Procollagen C-endopeptidase enhancer 1                                                               | PCOLCE |
| HH | MOL000098 | quercetin | Puromycin-sensitive aminopeptidase                                                                   | NPEPPS |
| HH | MOL000098 | quercetin | Hexokinase-2                                                                                         | HK2    |
| HH | MOL000098 | quercetin | Homeobox protein Nkx-3.1                                                                             | NKX3-1 |
| HH | MOL000098 | quercetin | Ras GTPase-activating protein 1                                                                      | RASA1  |
| HH | MOL000098 | quercetin | Peroxidase C1A                                                                                       | PRXC1A |
| HH | MOL000098 | quercetin | Glutathione S-transferase Mu 1                                                                       | GSTM1  |
| HH | MOL000098 | quercetin | Glutathione S-transferase Mu 2                                                                       | GSTM2  |

|    |           |                                                      |                                                                                 |        |
|----|-----------|------------------------------------------------------|---------------------------------------------------------------------------------|--------|
| HH | MOL002757 | 7,8-dimethyl-1H-pyrimido[5,6-g]quinoxaline-2,4-dione | Prostaglandin G/H synthase 1                                                    | PTGS1  |
| HH | MOL002757 | 7,8-dimethyl-1H-pyrimido[5,6-g]quinoxaline-2,4-dione | Prostaglandin G/H synthase 2                                                    | PTGS2  |
| HH | MOL002757 | 7,8-dimethyl-1H-pyrimido[5,6-g]quinoxaline-2,4-dione | Gamma-aminobutyric acid receptor subunit alpha-1                                | GABRA1 |
| HH | MOL002757 | 7,8-dimethyl-1H-pyrimido[5,6-g]quinoxaline-2,4-dione | Heat shock protein HSP 90                                                       | HSP90  |
| HH | MOL002757 | 7,8-dimethyl-1H-pyrimido[5,6-g]quinoxaline-2,4-dione | mRNA of PKA Catalytic Subunit C-alpha                                           | PRKACA |
| HH | MOL002721 | quercetagenin                                        | Androgen receptor                                                               | AR     |
| HH | MOL002721 | quercetagenin                                        | Peroxisome proliferator activated receptor gamma                                | PPARG  |
| HH | MOL002721 | quercetagenin                                        | Prostaglandin G/H synthase 2                                                    | PTGS2  |
| HH | MOL002721 | quercetagenin                                        | Heat shock protein HSP 90                                                       | HSP90  |
| HH | MOL002721 | quercetagenin                                        | Phosphatidylinositol-4,5-bisphosphate 3-kinase catalytic subunit, gamma isoform | PIK3CG |
| HH | MOL002721 | quercetagenin                                        | Dipeptidyl peptidase IV                                                         | DPP4   |
| HH | MOL002721 | quercetagenin                                        | Trypsin-1                                                                       | TRY1   |
| HH | MOL002721 | quercetagenin                                        | DNA topoisomerase II                                                            | TOP2   |
| HH | MOL000449 | Stigmasterol                                         | Progesterone receptor                                                           | PGR    |
| HH | MOL000449 | Stigmasterol                                         | Mineralocorticoid receptor                                                      | NR3C2  |
| HH | MOL000449 | Stigmasterol                                         | Nuclear receptor coactivator 2                                                  | NCOA2  |
| HH | MOL000449 | Stigmasterol                                         | Alcohol dehydrogenase 1C                                                        | ADH1C  |
| HH | MOL000449 | Stigmasterol                                         | Ig gamma-1 chain C region                                                       | IGHG1  |
| HH | MOL000449 | Stigmasterol                                         | Retinoic acid receptor RXR-alpha                                                | RXRA   |
| HH | MOL000449 | Stigmasterol                                         | Nuclear receptor coactivator 1                                                  | NCOA1  |
| HH | MOL000449 | Stigmasterol                                         | Prostaglandin G/H synthase 1                                                    | PTGS1  |
| HH | MOL000449 | Stigmasterol                                         | Prostaglandin G/H synthase 2                                                    | PTGS2  |
| HH | MOL000449 | Stigmasterol                                         | Alpha-2A adrenergic receptor                                                    | ADRA2A |
| HH | MOL000449 | Stigmasterol                                         | Sodium-dependent noradrenaline transporter                                      | SLC6A2 |
| HH | MOL000449 | Stigmasterol                                         | Sodium-dependent dopamine transporter                                           | SLC6A3 |
| HH | MOL000449 | Stigmasterol                                         | Beta-2 adrenergic receptor                                                      | ADRB2  |
| HH | MOL000449 | Stigmasterol                                         | Aldose reductase                                                                | AR     |
| HH | MOL000449 | Stigmasterol                                         | Urokinase-type plasminogen activator                                            | PLAU   |
| HH | MOL000449 | Stigmasterol                                         | Leukotriene A-4 hydrolase                                                       | LTA4H  |
| HH | MOL000449 | Stigmasterol                                         | Amine oxidase [flavin-containing] B                                             | MAOB   |
| HH | MOL000449 | Stigmasterol                                         | Amine oxidase [flavin-containing] A                                             | MAOA   |
| HH | MOL000449 | Stigmasterol                                         | mRNA of PKA Catalytic Subunit C-alpha                                           | PRKACA |
| HH | MOL000449 | Stigmasterol                                         | Chymotrypsinogen B                                                              | CTRB1  |
| HH | MOL000449 | Stigmasterol                                         | Muscarinic acetylcholine receptor M3                                            | CHRM3  |
| HH | MOL000449 | Stigmasterol                                         | Muscarinic acetylcholine receptor M1                                            | CHRM1  |
| HH | MOL000449 | Stigmasterol                                         | Beta-1 adrenergic receptor                                                      | ADRB1  |
| HH | MOL000449 | Stigmasterol                                         | Sodium channel protein type 5 subunit alpha                                     | SCN5A  |
| HH | MOL000449 | Stigmasterol                                         | 5-hydroxytryptamine 2A receptor                                                 | HTR2A  |
| HH | MOL000449 | Stigmasterol                                         | Alpha-1A adrenergic receptor                                                    | ADRA1A |
| HH | MOL000449 | Stigmasterol                                         | Gamma-aminobutyric-acid receptor alpha-3 subunit                                | GABRA3 |
| HH | MOL000449 | Stigmasterol                                         | Muscarinic acetylcholine receptor M2                                            | CHRM2  |
| HH | MOL000449 | Stigmasterol                                         | Alpha-1B adrenergic receptor                                                    | ADRA1B |



|    |           |              |                                                                                     |        |
|----|-----------|--------------|-------------------------------------------------------------------------------------|--------|
| HH | MOL000449 | Stigmasterol | Gamma-aminobutyric acid receptor subunit<br>alpha-1                                 | GABRA1 |
| HH | MOL000449 | Stigmasterol | Neuronal acetylcholine receptor protein,<br>alpha-7 chain                           | CHRNA7 |
| HH | MOL002695 | lignan       | Estrogen receptor                                                                   | ER     |
| HH | MOL002695 | lignan       | Coagulation factor Xa                                                               | F10    |
| HH | MOL002695 | lignan       | Prostaglandin G/H synthase 2                                                        | PTGS2  |
| HH | MOL002695 | lignan       | Carbonic anhydrase II                                                               | CA2    |
| HH | MOL002695 | lignan       | DNA topoisomerase II                                                                | TOP2   |
| HH | MOL002695 | lignan       | Nuclear receptor coactivator 2                                                      | NCOA2  |
| HH | MOL002695 | lignan       | Calcium-activated potassium channel subunit<br>alpha 1                              | KCNMA1 |
| HH | MOL002695 | lignan       | Calmodulin                                                                          | CALM   |
| HH | MOL000422 | kaempferol   | Nitric oxide synthase, inducible                                                    | NOS2   |
| HH | MOL000422 | kaempferol   | Prostaglandin G/H synthase 1                                                        | PTGS1  |
| HH | MOL000422 | kaempferol   | Androgen receptor                                                                   | AR     |
| HH | MOL000422 | kaempferol   | Peroxisome proliferator activated receptor<br>gamma                                 | PPARG  |
| HH | MOL000422 | kaempferol   | Prostaglandin G/H synthase 2                                                        | PTGS2  |
| HH | MOL000422 | kaempferol   | Heat shock protein HSP 90                                                           | HSP90  |
| HH | MOL000422 | kaempferol   | Phosphatidylinositol-4,5-bisphosphate 3-<br>kinase catalytic subunit, gamma isoform | PIK3CG |
| HH | MOL000422 | kaempferol   | mRNA of PKA Catalytic Subunit C-alpha                                               | PRKACA |
| HH | MOL000422 | kaempferol   | Nuclear receptor coactivator 2                                                      | NCOA2  |
| HH | MOL000422 | kaempferol   | Dipeptidyl peptidase IV                                                             | DPP4   |
| HH | MOL000422 | kaempferol   | Trypsin-1                                                                           | TRY1   |
| HH | MOL000422 | kaempferol   | Progesterone receptor                                                               | PGR    |
| HH | MOL000422 | kaempferol   | Thrombin                                                                            | F2     |
| HH | MOL000422 | kaempferol   | Muscarinic acetylcholine receptor M1                                                | CHRM1  |
| HH | MOL000422 | kaempferol   | Nitric-oxide synthase, endothelial                                                  | NOS3   |
| HH | MOL000422 | kaempferol   | Gamma-aminobutyric-acid receptor alpha-2<br>subunit                                 | GABRA2 |
| HH | MOL000422 | kaempferol   | Acetylcholinesterase                                                                | ACHE   |
| HH | MOL000422 | kaempferol   | Sodium-dependent noradrenaline transporter                                          | SLC6A2 |
| HH | MOL000422 | kaempferol   | Muscarinic acetylcholine receptor M2                                                | CHRM2  |
| HH | MOL000422 | kaempferol   | Alpha-1B adrenergic receptor                                                        | ADRA1B |
| HH | MOL000422 | kaempferol   | Gamma-aminobutyric acid receptor subunit<br>alpha-1                                 | GABRA1 |
| HH | MOL000422 | kaempferol   | DNA topoisomerase II                                                                | TOP2   |
| HH | MOL000422 | kaempferol   | Coagulation factor VII                                                              | F7     |
| HH | MOL000422 | kaempferol   | Calmodulin                                                                          | CALM   |
| HH | MOL000422 | kaempferol   | Transcription factor p65                                                            | RELA   |
| HH | MOL000422 | kaempferol   | Inhibitor of nuclear factor kappa-B kinase<br>subunit beta                          | IKBKB  |
| HH | MOL000422 | kaempferol   | RAC-alpha serine/threonine-protein kinase                                           | AKT1   |
| HH | MOL000422 | kaempferol   | Apoptosis regulator Bcl-2                                                           | BCL2   |
| HH | MOL000422 | kaempferol   | Apoptosis regulator BAX                                                             | BAX    |
| HH | MOL000422 | kaempferol   | Tumor necrosis factor                                                               | TNF    |
| HH | MOL000422 | kaempferol   | Transcription factor AP-1                                                           | TFAP1  |
| HH | MOL000422 | kaempferol   | Activator of 90 kDa heat shock protein<br>ATPase homolog 1                          | AHSA1  |
| HH | MOL000422 | kaempferol   | Caspase-3                                                                           | CASP3  |
| HH | MOL000422 | kaempferol   | Mitogen-activated protein kinase 8                                                  | MAPK8  |
| HH | MOL000422 | kaempferol   | Xanthine dehydrogenase/oxidase                                                      | XDH    |
| HH | MOL000422 | kaempferol   | Interstitial collagenase                                                            | MMP1   |
| HH | MOL000422 | kaempferol   | Signal transducer and activator of<br>transcription 1-alpha/beta                    | STAT1  |
| HH | MOL000422 | kaempferol   | Cell division control protein 2 homolog                                             | CDK2   |
| HH | MOL000422 | kaempferol   | Peroxisome proliferator-activated receptor<br>gamma                                 | PPARG  |

|    |           |                          |                                                                         |        |
|----|-----------|--------------------------|-------------------------------------------------------------------------|--------|
| HH | MOL000422 | kaempferol               | Heme oxygenase 1                                                        | HMOX1  |
| HH | MOL000422 | kaempferol               | Cytochrome P450 3A4                                                     | CYP3A4 |
| HH | MOL000422 | kaempferol               | Cytochrome P450 1A2                                                     | CYP1A2 |
| HH | MOL000422 | kaempferol               | Cytochrome P450 1A1                                                     | CYP1A1 |
| HH | MOL000422 | kaempferol               | Intercellular adhesion molecule 1                                       | ICAM1  |
| HH | MOL000422 | kaempferol               | E-selectin                                                              | SELE   |
| HH | MOL000422 | kaempferol               | Vascular cell adhesion protein 1                                        | VCAM1  |
| HH | MOL000422 | kaempferol               | Nuclear receptor subfamily 1 group I member                             | NR1I2  |
| HH | MOL000422 | kaempferol               | Cytochrome P450 1B1                                                     | CYP1B1 |
| HH | MOL000422 | kaempferol               | Arachidonate 5-lipoxygenase                                             | ALOX5  |
| HH | MOL000422 | kaempferol               | Hyaluronan synthase 2                                                   | HAS2   |
| HH | MOL000422 | kaempferol               | Glutathione S-transferase P                                             | GSTP1  |
| HH | MOL000422 | kaempferol               | Aryl hydrocarbon receptor                                               | AHR    |
| HH | MOL000422 | kaempferol               | 26S proteasome non-ATPase regulatory subunit 3                          | PSMD3  |
| HH | MOL000422 | kaempferol               | Solute carrier family 2, facilitated glucose transporter member 4       | SLC2A4 |
| HH | MOL000422 | kaempferol               | Nuclear receptor subfamily 1 group I member                             | NR1I3  |
| HH | MOL000422 | kaempferol               | Insulin receptor                                                        | INSR   |
| HH | MOL000422 | kaempferol               | Type I iodothyronine deiodinase                                         | DIO1   |
| HH | MOL000422 | kaempferol               | Serine/threonine-protein phosphatase 2B catalytic subunit alpha isoform | PP3CB  |
| HH | MOL000422 | kaempferol               | Peroxidase C1A                                                          | PRXC1A |
| HH | MOL000422 | kaempferol               | Glutathione S-transferase Mu 1                                          | GSTM1  |
| HH | MOL000422 | kaempferol               | Glutathione S-transferase Mu 2                                          | GSTM2  |
| HH | MOL000422 | kaempferol               | Aldo-keto reductase family 1 member C3                                  | AKR1C3 |
| HH | MOL000422 | kaempferol               | Antileukoproteinase                                                     | SLPI   |
| HH | MOL002776 | Baicalin                 | Coagulation factor Xa                                                   | F10    |
| HH | MOL002776 | Baicalin                 | mRNA of Protein-tyrosine phosphatase, non-receptor type 1               | PTPN1  |
| HH | MOL000953 | CLR                      | Progesterone receptor                                                   | PGR    |
| HH | MOL000953 | CLR                      | Mineralocorticoid receptor                                              | NR3C2  |
| HH | MOL000953 | CLR                      | Nuclear receptor coactivator 2                                          | NCOA2  |
| HH | MOL002773 | beta-carotene            | RAC-alpha serine/threonine-protein kinase                               | AKT1   |
| HH | MOL002773 | beta-carotene            | Vascular endothelial growth factor A                                    | VEGFA  |
| HH | MOL002773 | beta-carotene            | Apoptosis regulator Bcl-2                                               | BCL2   |
| HH | MOL002773 | beta-carotene            | Caspase-9                                                               | CASP9  |
| HH | MOL002773 | beta-carotene            | 72 kDa type IV collagenase                                              | MMP2   |
| HH | MOL002773 | beta-carotene            | Transcription factor AP-1                                               | TFAP1  |
| HH | MOL002773 | beta-carotene            | Caspase-3                                                               | CASP3  |
| HH | MOL002773 | beta-carotene            | Prostaglandin G/H synthase 2                                            | PTGS2  |
| HH | MOL002773 | beta-carotene            | Caspase-8                                                               | CASP8  |
| HH | MOL002773 | beta-carotene            | Interstitial collagenase                                                | MMP1   |
| HH | MOL002773 | beta-carotene            | Heme oxygenase 1                                                        | HMOX1  |
| HH | MOL002773 | beta-carotene            | Cytochrome P450 3A4                                                     | CYP3A4 |
| HH | MOL002773 | beta-carotene            | Cytochrome P450 2B1                                                     | CYP2B1 |
| HH | MOL002773 | beta-carotene            | Cytochrome P450 1A2                                                     | CYP1A2 |
| HH | MOL002773 | beta-carotene            | Caveolin-1                                                              | CAV1   |
| HH | MOL002773 | beta-carotene            | Catenin beta-1                                                          | CTNNB1 |
| HH | MOL002773 | beta-carotene            | Myc proto-oncogene protein                                              | MYC    |
| HH | MOL002773 | beta-carotene            | Caspase-7                                                               | CASP7  |
| HH | MOL002773 | beta-carotene            | Tissue factor                                                           | F3     |
| HH | MOL002773 | beta-carotene            | Gap junction alpha-1 protein                                            | GJA1   |
| HH | MOL002773 | beta-carotene            | Stromelysin-2                                                           | MMP10  |
| HH | MOL001771 | poriferast-5-en-3beta-ol | Progesterone receptor                                                   | PGR    |
| HH | MOL001772 | poriferast-5-en-4beta-ol | Nuclear receptor coactivator 2                                          | NCOA2  |
| HH | MOL000358 | beta-sitosterol          | Progesterone receptor                                                   | PGR    |

|    |           |                 |                                                                                 |        |
|----|-----------|-----------------|---------------------------------------------------------------------------------|--------|
| HH | MOL000358 | beta-sitosterol | Nuclear receptor coactivator 2                                                  | NCOA2  |
| HH | MOL000358 | beta-sitosterol | Prostaglandin G/H synthase 1                                                    | PTGS1  |
| HH | MOL000358 | beta-sitosterol | Prostaglandin G/H synthase 2                                                    | PTGS2  |
| HH | MOL000358 | beta-sitosterol | Heat shock protein HSP 90                                                       | HSP90  |
| HH | MOL000358 | beta-sitosterol | Phosphatidylinositol-4,5-bisphosphate 3-kinase catalytic subunit, gamma isoform | PIK3CG |
| HH | MOL000358 | beta-sitosterol | Potassium voltage-gated channel subfamily H member 2                            | KCNH2  |
| HH | MOL000358 | beta-sitosterol | mRNA of PKA Catalytic Subunit C-alpha                                           | PRKACA |
| HH | MOL000358 | beta-sitosterol | Dopamine D1 receptor                                                            | DRD1   |
| HH | MOL000358 | beta-sitosterol | Muscarinic acetylcholine receptor M3                                            | CHRM3  |
| HH | MOL000358 | beta-sitosterol | Muscarinic acetylcholine receptor M1                                            | CHRM1  |
| HH | MOL000358 | beta-sitosterol | Sodium channel protein type 5 subunit alpha                                     | SCN5A  |
| HH | MOL000358 | beta-sitosterol | Gamma-aminobutyric-acid receptor alpha-2 subunit                                | GABRA2 |
| HH | MOL000358 | beta-sitosterol | Muscarinic acetylcholine receptor M4                                            | CHRM4  |
| HH | MOL000358 | beta-sitosterol | CGMP-inhibited 3',5'-cyclic phosphodiesterase A                                 | PDE3A  |
| HH | MOL000358 | beta-sitosterol | 5-hydroxytryptamine 2A receptor                                                 | HTR2A  |
| HH | MOL000358 | beta-sitosterol | Gamma-aminobutyric-acid receptor alpha-5 subunit                                | GABRA5 |
| HH | MOL000358 | beta-sitosterol | Alpha-1A adrenergic receptor                                                    | ADRA1A |
| HH | MOL000358 | beta-sitosterol | Gamma-aminobutyric-acid receptor alpha-3 subunit                                | GABRA3 |
| HH | MOL000358 | beta-sitosterol | Muscarinic acetylcholine receptor M2                                            | CHRM2  |
| HH | MOL000358 | beta-sitosterol | Alpha-1B adrenergic receptor                                                    | ADRA1B |
| HH | MOL000358 | beta-sitosterol | Beta-2 adrenergic receptor                                                      | ADRB2  |
| HH | MOL000358 | beta-sitosterol | Neuronal acetylcholine receptor subunit                                         | CHRNA2 |
| HH | MOL000358 | beta-sitosterol | Sodium-dependent serotonin transporter                                          | SLC6A4 |
| HH | MOL000358 | beta-sitosterol | Mu-type opioid receptor                                                         | OPRM1  |
| HH | MOL000358 | beta-sitosterol | Gamma-aminobutyric acid receptor subunit alpha-1                                | GABRA1 |
| HH | MOL000358 | beta-sitosterol | Neuronal acetylcholine receptor protein, alpha-7 chain                          | CHRNA7 |
| HH | MOL000358 | beta-sitosterol | Apoptosis regulator Bcl-2                                                       | BCL2   |
| HH | MOL000358 | beta-sitosterol | Apoptosis regulator BAX                                                         | BAX    |
| HH | MOL000358 | beta-sitosterol | Caspase-9                                                                       | CASP9  |
| HH | MOL000358 | beta-sitosterol | Transcription factor AP-1                                                       | TFAP1  |
| HH | MOL000358 | beta-sitosterol | Caspase-3                                                                       | CASP3  |
| HH | MOL000358 | beta-sitosterol | Caspase-8                                                                       | CASP8  |
| HH | MOL000358 | beta-sitosterol | Protein kinase C alpha type                                                     | PRKCA  |
| HH | MOL000358 | beta-sitosterol | Transforming growth factor beta-1                                               | TGFB1  |
| HH | MOL000358 | beta-sitosterol | Serum paraoxonase/arylesterase 1                                                | PON1   |
| HH | MOL000358 | beta-sitosterol | Microtubule-associated protein 2                                                | MAP2   |
| HH | MOL000006 | luteolin        | Prostaglandin G/H synthase 1                                                    | PTGS1  |
| HH | MOL000006 | luteolin        | Androgen receptor                                                               | AR     |
| HH | MOL000006 | luteolin        | Prostaglandin G/H synthase 2                                                    | PTGS2  |
| HH | MOL000006 | luteolin        | Heat shock protein HSP 90                                                       | HSP90  |
| HH | MOL000006 | luteolin        | Trypsin-1                                                                       | TRY1   |
| HH | MOL000006 | luteolin        | Nuclear receptor coactivator 2                                                  | NCOA2  |
| HH | MOL000006 | luteolin        | mRNA of PKA Catalytic Subunit C-alpha                                           | PRKACA |
| HH | MOL000006 | luteolin        | Dipeptidyl peptidase IV                                                         | DPP4   |
| HH | MOL000006 | luteolin        | Phosphatidylinositol-4,5-bisphosphate 3-kinase catalytic subunit, gamma isoform | PIK3CG |
| HH | MOL000006 | luteolin        | Transcription factor p65                                                        | RELA   |
| HH | MOL000006 | luteolin        | Epidermal growth factor receptor                                                | EGFR   |
| HH | MOL000006 | luteolin        | RAC-alpha serine/threonine-protein kinase                                       | AKT1   |
| HH | MOL000006 | luteolin        | Vascular endothelial growth factor A                                            | VEGFA  |
| HH | MOL000006 | luteolin        | G1/S-specific cyclin-D1                                                         | CCND1  |
| HH | MOL000006 | luteolin        | Bcl-2-like protein 1                                                            | BCL2L1 |

|    |           |           |                                                                                     |        |
|----|-----------|-----------|-------------------------------------------------------------------------------------|--------|
| HH | MOL000006 | luteolin  | Cyclin-dependent kinase inhibitor 1                                                 | CDKN1A |
| HH | MOL000006 | luteolin  | Caspase-9                                                                           | CASP9  |
| HH | MOL000006 | luteolin  | 72 kDa type IV collagenase                                                          | MMP2   |
| HH | MOL000006 | luteolin  | Matrix metalloproteinase-9                                                          | MMP9   |
| HH | MOL000006 | luteolin  | Mitogen-activated protein kinase 1                                                  | MAPK1  |
| HH | MOL000006 | luteolin  | Interleukin-10                                                                      | IL10   |
| HH | MOL000006 | luteolin  | Retinoblastoma-associated protein                                                   | RB1    |
| HH | MOL000006 | luteolin  | Cell division protein kinase 4                                                      | CDK4   |
| HH | MOL000006 | luteolin  | Tumor necrosis factor                                                               | TNF    |
| HH | MOL000006 | luteolin  | Transcription factor AP-1                                                           | TFAP1  |
| HH | MOL000006 | luteolin  | Interleukin-6                                                                       | IL6    |
| HH | MOL000006 | luteolin  | Caspase-3                                                                           | CASP3  |
| HH | MOL000006 | luteolin  | Cellular tumor antigen p53                                                          | TP53   |
| HH | MOL000006 | luteolin  | NF-kappa-B inhibitor alpha                                                          | NFKBIA |
| HH | MOL000006 | luteolin  | Xanthine dehydrogenase/oxidase                                                      | XDH    |
| HH | MOL000006 | luteolin  | DNA topoisomerase 1                                                                 | TOP1   |
| HH | MOL000006 | luteolin  | E3 ubiquitin-protein ligase Mdm2                                                    | MDM2   |
| HH | MOL000006 | luteolin  | Amyloid beta A4 protein                                                             | ABPA4  |
| HH | MOL000006 | luteolin  | Interstitial collagenase                                                            | MMP1   |
| HH | MOL000006 | luteolin  | Proliferating cell nuclear antigen                                                  | PCNA   |
| HH | MOL000006 | luteolin  | Receptor tyrosine-protein kinase erbB-2                                             | ERBB2  |
| HH | MOL000006 | luteolin  | Peroxisome proliferator-activated receptor<br>gamma                                 | PPARG  |
| HH | MOL000006 | luteolin  | Heme oxygenase 1                                                                    | HMOX1  |
| HH | MOL000006 | luteolin  | Caspase-7                                                                           | CASP7  |
| HH | MOL000006 | luteolin  | Intercellular adhesion molecule 1                                                   | ICAM1  |
| HH | MOL000006 | luteolin  | Induced myeloid leukemia cell differentiation<br>protein Mcl-1                      | MCL1   |
| HH | MOL000006 | luteolin  | Baculoviral IAP repeat-containing protein 5                                         | BIRC5  |
| HH | MOL000006 | luteolin  | Interleukin-2                                                                       | IL2    |
| HH | MOL000006 | luteolin  | G2/mitotic-specific cyclin-B1                                                       | CCNB1  |
| HH | MOL000006 | luteolin  | Tyrosinase                                                                          | TYR    |
| HH | MOL000006 | luteolin  | Interferon gamma                                                                    | IFNG   |
| HH | MOL000006 | luteolin  | Interleukin-4                                                                       | IL4    |
| HH | MOL000006 | luteolin  | DNA topoisomerase 2-alpha                                                           | TOP2A  |
| HH | MOL000006 | luteolin  | Glutathione S-transferase P                                                         | GSTP1  |
| HH | MOL000006 | luteolin  | Baculoviral IAP repeat-containing protein 4                                         | BIRC4  |
| HH | MOL000006 | luteolin  | Solute carrier family 2, facilitated glucose<br>transporter member 4                | SLC2A4 |
| HH | MOL000006 | luteolin  | Insulin receptor                                                                    | INSR   |
| HH | MOL000006 | luteolin  | CD40 ligand                                                                         | CD40LG |
| HH | MOL000006 | luteolin  | Prostaglandin E synthase                                                            | PTGES  |
| HH | MOL000006 | luteolin  | Kinetochores protein Nuf2                                                           | NUF2   |
| HH | MOL000006 | luteolin  | Adenylate cyclase type 2                                                            | ADCY2  |
| HH | MOL000006 | luteolin  | Hepatocyte growth factor receptor                                                   | MET    |
| HH | MOL002714 | baicalein | Prostaglandin G/H synthase 1                                                        | PTGS1  |
| HH | MOL002714 | baicalein | Androgen receptor                                                                   | AR     |
| HH | MOL002714 | baicalein | Prostaglandin G/H synthase 2                                                        | PTGS2  |
| HH | MOL002714 | baicalein | Heat shock protein HSP 90                                                           | HSP90  |
| HH | MOL002714 | baicalein | mRNA of PKA Catalytic Subunit C-alpha                                               | PRKACA |
| HH | MOL002714 | baicalein | Dipeptidyl peptidase IV                                                             | DPP4   |
| HH | MOL002714 | baicalein | Phosphatidylinositol-4,5-bisphosphate 3-<br>kinase catalytic subunit, gamma isoform | PIK3CG |
| HH | MOL002714 | baicalein | CGMP-inhibited 3',5'-cyclic<br>phosphodiesterase A                                  | PDE3A  |
| HH | MOL002714 | baicalein | Trypsin-1                                                                           | TRY1   |
| HH | MOL002714 | baicalein | Nuclear receptor coactivator 2                                                      | NCOA2  |
| HH | MOL002714 | baicalein | Nuclear receptor coactivator 1                                                      | NCOA1  |
| HH | MOL002714 | baicalein | Calmodulin                                                                          | CALM   |

|    |           |           |                                                                                     |        |
|----|-----------|-----------|-------------------------------------------------------------------------------------|--------|
| HH | MOL002714 | baicalein | Transcription factor p65                                                            | RELA   |
| HH | MOL002714 | baicalein | RAC-alpha serine/threonine-protein kinase                                           | AKT1   |
| HH | MOL002714 | baicalein | Vascular endothelial growth factor A                                                | VEGFA  |
| HH | MOL002714 | baicalein | Apoptosis regulator Bcl-2                                                           | BCL2   |
| HH | MOL002714 | baicalein | Proto-oncogene c-Fos                                                                | FOS    |
| HH | MOL002714 | baicalein | Apoptosis regulator BAX                                                             | BAX    |
| HH | MOL002714 | baicalein | Matrix metalloproteinase-9                                                          | MMP9   |
| HH | MOL002714 | baicalein | Caspase-3                                                                           | CASP3  |
| HH | MOL002714 | baicalein | Cellular tumor antigen p53                                                          | TP53   |
| HH | MOL002714 | baicalein | Hypoxia-inducible factor 1-alpha                                                    | HIF1A  |
| HH | MOL002714 | baicalein | Fos-related antigen 1                                                               | FOSL1  |
| HH | MOL002714 | baicalein | Fos-related antigen 2                                                               | FOSL2  |
| HH | MOL002714 | baicalein | Cell division control protein 2 homolog                                             | CDK2   |
| HH | MOL002714 | baicalein | G2/mitotic-specific cyclin-B1                                                       | CCNB1  |
| HH | MOL002714 | baicalein | Myeloperoxidase                                                                     | MPO    |
| HH | MOL002714 | baicalein | Aryl hydrocarbon receptor                                                           | AHR    |
| HH | MOL002714 | baicalein | Insulin-like growth factor II                                                       | IGF2   |
| HH | MOL002714 | baicalein | Cytochrome c                                                                        | CYCS   |
| HH | MOL002714 | baicalein | Arachidonate 12-lipoxygenase, 12S-type                                              | ALOX12 |
| HH | MOL002714 | baicalein | Nuclear factor of activated T-cells,<br>cytoplasmic 1                               | NFATC1 |
| HH | MOL002714 | baicalein | Tudor domain-containing protein 7                                                   | TDRD7  |
| HH | MOL002714 | baicalein | Egl nine homolog 1                                                                  | EGLN1  |
| HH | MOL002714 | baicalein | NADPH oxidase 5                                                                     | NOX5   |
| HH | MOL002714 | baicalein | Fatty acid-binding protein, epidermal                                               | FABP5  |
| HH | MOL002714 | baicalein | Apolipoprotein D                                                                    | APOD   |
| SQ | MOL000098 | quercetin | Prostaglandin G/H synthase 1                                                        | PTGS1  |
| SQ | MOL000098 | quercetin | Androgen receptor                                                                   | AR     |
| SQ | MOL000098 | quercetin | Peroxisome proliferator activated receptor<br>gamma                                 | PPARG  |
| SQ | MOL000098 | quercetin | Prostaglandin G/H synthase 2                                                        | PTGS2  |
| SQ | MOL000098 | quercetin | Heat shock protein HSP 90                                                           | HSP90  |
| SQ | MOL000098 | quercetin | Phosphatidylinositol-4,5-bisphosphate 3-<br>kinase catalytic subunit, gamma isoform | PIK3CG |
| SQ | MOL000098 | quercetin | Nuclear receptor coactivator 2                                                      | NCOA2  |
| SQ | MOL000098 | quercetin | Dipeptidyl peptidase 4                                                              | DPP4   |
| SQ | MOL000098 | quercetin | Aldose reductase                                                                    | AR     |
| SQ | MOL000098 | quercetin | Trypsin-1                                                                           | TRY1   |
| SQ | MOL000098 | quercetin | DNA topoisomerase II                                                                | TOP2   |
| SQ | MOL000098 | quercetin | Thrombin                                                                            | F2     |
| SQ | MOL000098 | quercetin | Potassium voltage-gated channel subfamily H<br>member 2                             | KCNH2  |
| SQ | MOL000098 | quercetin | Sodium channel protein type 5 subunit alpha                                         | SCN5A  |
| SQ | MOL000098 | quercetin | Coagulation factor X                                                                | F10    |
| SQ | MOL000098 | quercetin | Beta-2 adrenergic receptor                                                          | ADRB2  |
| SQ | MOL000098 | quercetin | Stromelysin-1                                                                       | MMP3   |
| SQ | MOL000098 | quercetin | mRNA of PKA Catalytic Subunit C-alpha                                               | PRKACA |
| SQ | MOL000098 | quercetin | Coagulation factor VII                                                              | F7     |
| SQ | MOL000098 | quercetin | Nitric oxide synthase, endothelial                                                  | NOS3   |
| SQ | MOL000098 | quercetin | Retinoic acid receptor RXR-alpha                                                    | RXRA   |
| SQ | MOL000098 | quercetin | Acetylcholinesterase                                                                | ACHE   |
| SQ | MOL000098 | quercetin | Gamma-aminobutyric acid receptor subunit<br>alpha-1                                 | GABRA1 |
| SQ | MOL000098 | quercetin | Amine oxidase [flavin-containing] B                                                 | MAOB   |
| SQ | MOL000098 | quercetin | Transcription factor p65                                                            | RELA   |
| SQ | MOL000098 | quercetin | Epidermal growth factor receptor                                                    | EGFR   |
| SQ | MOL000098 | quercetin | RAC-alpha serine/threonine-protein kinase                                           | AKT1   |
| SQ | MOL000098 | quercetin | Vascular endothelial growth factor A                                                | VEGFA  |
| SQ | MOL000098 | quercetin | G1/S-specific cyclin-D1                                                             | CCND1  |

|    |           |           |                                                                  |         |
|----|-----------|-----------|------------------------------------------------------------------|---------|
| SQ | MOL000098 | quercetin | Apoptosis regulator Bcl-2                                        | BCL2    |
| SQ | MOL000098 | quercetin | Bcl-2-like protein 1                                             | BCL2L1  |
| SQ | MOL000098 | quercetin | Proto-oncogene c-Fos                                             | FOS     |
| SQ | MOL000098 | quercetin | Cyclin-dependent kinase inhibitor 1                              | CDKN1A  |
| SQ | MOL000098 | quercetin | Eukaryotic translation initiation factor 6                       | EIF6    |
| SQ | MOL000098 | quercetin | Apoptosis regulator BAX                                          | BAX     |
| SQ | MOL000098 | quercetin | Caspase-9                                                        | CASP9   |
| SQ | MOL000098 | quercetin | Urokinase-type plasminogen activator                             | PLAU    |
| SQ | MOL000098 | quercetin | 72 kDa type IV collagenase                                       | MMP2    |
| SQ | MOL000098 | quercetin | Matrix metalloproteinase-9                                       | MMP9    |
| SQ | MOL000098 | quercetin | Mitogen-activated protein kinase 1                               | MAPK1   |
| SQ | MOL000098 | quercetin | Interleukin-10                                                   | IL10    |
| SQ | MOL000098 | quercetin | Pro-epidermal growth factor                                      | EGF     |
| SQ | MOL000098 | quercetin | Retinoblastoma-associated protein                                | RB1     |
| SQ | MOL000098 | quercetin | Tumor necrosis factor                                            | TNF     |
| SQ | MOL000098 | quercetin | Transcription factor AP-1                                        | TFAP1   |
| SQ | MOL000098 | quercetin | Interleukin-6                                                    | IL6     |
| SQ | MOL000098 | quercetin | Cyclin-dependent kinase inhibitor 2A                             | CDKN2A  |
| SQ | MOL000098 | quercetin | Activator of 90 kDa heat shock protein<br>ATPase homolog 1       | AHSA1   |
| SQ | MOL000098 | quercetin | Caspase-3                                                        | CASP3   |
| SQ | MOL000098 | quercetin | Cellular tumor antigen p53                                       | TP53    |
| SQ | MOL000098 | quercetin | ETS domain-containing protein Elk-1                              | ELK1    |
| SQ | MOL000098 | quercetin | NF-kappa-B inhibitor alpha                                       | NFKBIA  |
| SQ | MOL000098 | quercetin | NADPH--cytochrome P450 reductase                                 | POR     |
| SQ | MOL000098 | quercetin | Ornithine decarboxylase                                          | ODC1    |
| SQ | MOL000098 | quercetin | Xanthine dehydrogenase/oxidase                                   | XDH     |
| SQ | MOL000098 | quercetin | Caspase-8                                                        | CASP8   |
| SQ | MOL000098 | quercetin | DNA topoisomerase 1                                              | TOP1    |
| SQ | MOL000098 | quercetin | RAF proto-oncogene serine/threonine-protein<br>kinase            | RAF1    |
| SQ | MOL000098 | quercetin | Superoxide dismutase [Cu-Zn]                                     | SOD1    |
| SQ | MOL000098 | quercetin | Protein kinase C alpha type                                      | PRKCA   |
| SQ | MOL000098 | quercetin | Interstitial collagenase                                         | MMP1    |
| SQ | MOL000098 | quercetin | Hypoxia-inducible factor 1-alpha                                 | HIF1A   |
| SQ | MOL000098 | quercetin | Signal transducer and activator of<br>transcription 1-alpha/beta | STAT1   |
| SQ | MOL000098 | quercetin | Protein CBFA2T1                                                  | RUNX1T1 |
| SQ | MOL000098 | quercetin | Probable E3 ubiquitin-protein ligase HERC5                       | HERC5   |
| SQ | MOL000098 | quercetin | Cell division control protein 2 homolog                          | CDK2    |
| SQ | MOL000098 | quercetin | 78 kDa glucose-regulated protein                                 | GRP78   |
| SQ | MOL000098 | quercetin | Receptor tyrosine-protein kinase erbB-2                          | ERBB2   |
| SQ | MOL000098 | quercetin | Peroxisome proliferator-activated receptor<br>gamma              | PPARG   |
| SQ | MOL000098 | quercetin | Acetyl-CoA carboxylase 1                                         | ACACA   |
| SQ | MOL000098 | quercetin | Heme oxygenase 1                                                 | HMOX1   |
| SQ | MOL000098 | quercetin | Cytochrome P450 3A4                                              | CYP3A4  |
| SQ | MOL000098 | quercetin | Cytochrome P450 1A2                                              | CYP1A2  |
| SQ | MOL000098 | quercetin | Caveolin-1                                                       | CAV1    |
| SQ | MOL000098 | quercetin | Myc proto-oncogene protein                                       | MYC     |
| SQ | MOL000098 | quercetin | Tissue factor                                                    | F3      |
| SQ | MOL000098 | quercetin | Gap junction alpha-1 protein                                     | GJA1    |
| SQ | MOL000098 | quercetin | Cytochrome P450 1A1                                              | CYP1A1  |
| SQ | MOL000098 | quercetin | Intercellular adhesion molecule 1                                | ICAM1   |
| SQ | MOL000098 | quercetin | Interleukin-1 beta                                               | IL1B    |
| SQ | MOL000098 | quercetin | C-C motif chemokine 2                                            | CCL2    |
| SQ | MOL000098 | quercetin | E-selectin                                                       | SELE    |
| SQ | MOL000098 | quercetin | Vascular cell adhesion protein 1                                 | VCAM1   |
| SQ | MOL000098 | quercetin | Prostaglandin E2 receptor EP3 subtype                            | PTGER3  |

|    |           |           |                                                                                                         |          |
|----|-----------|-----------|---------------------------------------------------------------------------------------------------------|----------|
| SQ | MOL000098 | quercetin | Interleukin-8                                                                                           | CXCL8    |
| SQ | MOL000098 | quercetin | Protein kinase C beta type                                                                              | PRKCB    |
| SQ | MOL000098 | quercetin | Baculoviral IAP repeat-containing protein 5                                                             | BIRC5    |
| SQ | MOL000098 | quercetin | Dual oxidase 2                                                                                          | DUOX2    |
| SQ | MOL000098 | quercetin | Nitric oxide synthase, endothelial                                                                      | NOS3     |
| SQ | MOL000098 | quercetin | Heat shock protein beta-1                                                                               | HSPB1    |
| SQ | MOL000098 | quercetin | Transforming growth factor beta-1 proprotein                                                            | TGFB1    |
| SQ | MOL000098 | quercetin | Estrogen sulfotransferase                                                                               | STE      |
| SQ | MOL000098 | quercetin | Maltase-glucoamylase, intestinal                                                                        | MGAM     |
| SQ | MOL000098 | quercetin | Interleukin-2                                                                                           | IL2      |
| SQ | MOL000098 | quercetin | Nuclear receptor subfamily 1 group I member                                                             | NR1I2    |
| SQ | MOL000098 | quercetin | Cytochrome P450 1B1                                                                                     | CYP1B1   |
| SQ | MOL000098 | quercetin | G2/mitotic-specific cyclin-B1                                                                           | CCNB1    |
| SQ | MOL000098 | quercetin | Tissue-type plasminogen activator                                                                       | PLAT     |
| SQ | MOL000098 | quercetin | Thrombomodulin                                                                                          | THBD     |
| SQ | MOL000098 | quercetin | Plasminogen activator inhibitor 1                                                                       | SERPINE1 |
| SQ | MOL000098 | quercetin | Collagen alpha-1(I) chain                                                                               | COL1A1   |
| SQ | MOL000098 | quercetin | Interferon gamma                                                                                        | IFNG     |
| SQ | MOL000098 | quercetin | Arachidonate 5-lipoxygenase                                                                             | ALOX5    |
| SQ | MOL000098 | quercetin | Phosphatidylinositol-3,4,5-trisphosphate 3-phosphatase and dual-specificity protein<br>phosphatase PTEN | PTEN     |
| SQ | MOL000098 | quercetin | Interleukin-1 alpha                                                                                     | IL1A     |
| SQ | MOL000098 | quercetin | Myeloperoxidase                                                                                         | MPO      |
| SQ | MOL000098 | quercetin | DNA topoisomerase 2-alpha                                                                               | TOP2A    |
| SQ | MOL000098 | quercetin | Neutrophil cytosol factor 1                                                                             | NCF1     |
| SQ | MOL000098 | quercetin | ATP-binding cassette sub-family G member 2                                                              | ABCG2    |
| SQ | MOL000098 | quercetin | Hyaluronan synthase 2                                                                                   | HAS2     |
| SQ | MOL000098 | quercetin | Glutathione S-transferase P                                                                             | GSTP1    |
| SQ | MOL000098 | quercetin | Nuclear factor erythroid 2-related factor 2                                                             | NFE2L2   |
| SQ | MOL000098 | quercetin | NAD(P)H dehydrogenase [quinone] 1                                                                       | NQO1     |
| SQ | MOL000098 | quercetin | Poly [ADP-ribose] polymerase 1                                                                          | PARP1    |
| SQ | MOL000098 | quercetin | Aryl hydrocarbon receptor                                                                               | AHR      |
| SQ | MOL000098 | quercetin | 26S proteasome non-ATPase regulatory<br>subunit 3                                                       | PSMD3    |
| SQ | MOL000098 | quercetin | Solute carrier family 2, facilitated glucose<br>transporter member 4                                    | SLC2A4   |
| SQ | MOL000098 | quercetin | Collagen alpha-1(III) chain                                                                             | COL3A1   |
| SQ | MOL000098 | quercetin | DNA gyrase subunit B                                                                                    | GRYB     |
| SQ | MOL000098 | quercetin | C-X-C motif chemokine 11                                                                                | CXCL11   |
| SQ | MOL000098 | quercetin | C-X-C motif chemokine 2                                                                                 | CXCL2    |
| SQ | MOL000098 | quercetin | DDB1- and CUL4-associated factor 5                                                                      | DCAF5    |
| SQ | MOL000098 | quercetin | Nuclear receptor subfamily 1 group I member                                                             | NR1I3    |
| SQ | MOL000098 | quercetin | Serine/threonine-protein kinase Chk2                                                                    | CHEK2    |
| SQ | MOL000098 | quercetin | Insulin receptor                                                                                        | INSR     |
| SQ | MOL000098 | quercetin | Claudin-4                                                                                               | CLDN4    |
| SQ | MOL000098 | quercetin | Peroxisome proliferator-activated receptor                                                              | PPARA    |
| SQ | MOL000098 | quercetin | Peroxisome proliferator-activated receptor                                                              | PPARD    |
| SQ | MOL000098 | quercetin | Heat shock factor protein 1                                                                             | HSF1     |
| SQ | MOL000098 | quercetin | C-reactive protein                                                                                      | CRP      |
| SQ | MOL000098 | quercetin | C-X-C motif chemokine 10                                                                                | CXCL10   |
| SQ | MOL000098 | quercetin | Inhibitor of nuclear factor kappa-B kinase<br>subunit alpha                                             | CHUK     |
| SQ | MOL000098 | quercetin | Osteopontin                                                                                             | SPP1     |
| SQ | MOL000098 | quercetin | Runt-related transcription factor 2                                                                     | RUNX2    |
| SQ | MOL000098 | quercetin | Ras association domain-containing protein 1                                                             | RASSF1   |
| SQ | MOL000098 | quercetin | Transcription factor E2F1                                                                               | E2F1     |
| SQ | MOL000098 | quercetin | Transcription factor E2F2                                                                               | E2F2     |
| SQ | MOL000098 | quercetin | Prostatic acid phosphatase                                                                              | ACP3     |

|    |           |                 |                                                        |        |
|----|-----------|-----------------|--------------------------------------------------------|--------|
| SQ | MOL000098 | quercetin       | Cathepsin D                                            | CTSD   |
| SQ | MOL000098 | quercetin       | Insulin-like growth factor-binding protein 3           | IGFBP3 |
| SQ | MOL000098 | quercetin       | Insulin-like growth factor II                          | IGF2   |
| SQ | MOL000098 | quercetin       | CD40 ligand                                            | CD40LG |
| SQ | MOL000098 | quercetin       | Interferon regulatory factor 1                         | IRF1   |
| SQ | MOL000098 | quercetin       | Receptor tyrosine-protein kinase erbB-3                | ERBB3  |
| SQ | MOL000098 | quercetin       | Serum paraoxonase/arylesterase 1                       | PON1   |
| SQ | MOL000098 | quercetin       | Type I iodothyronine deiodinase                        | DIO1   |
| SQ | MOL000098 | quercetin       | Procollagen C-endopeptidase enhancer 1                 | PCOLCE |
| SQ | MOL000098 | quercetin       | Puromycin-sensitive aminopeptidase                     | NPEPPS |
| SQ | MOL000098 | quercetin       | Hexokinase-2                                           | HK2    |
| SQ | MOL000098 | quercetin       | Homeobox protein Nkx-3.1                               | NKX3-1 |
| SQ | MOL000098 | quercetin       | Ras GTPase-activating protein 1                        | RASA1  |
| SQ | MOL000098 | quercetin       | Peroxidase C1A                                         | PRXC1A |
| SQ | MOL000098 | quercetin       | Glutathione S-transferase Mu 1                         | GSTM1  |
| SQ | MOL000098 | quercetin       | Glutathione S-transferase Mu 2                         | GSTM2  |
| SQ | MOL000449 | Stigmasterol    | Progesterone receptor                                  | PGR    |
| SQ | MOL000449 | Stigmasterol    | Mineralocorticoid receptor                             | NR3C2  |
| SQ | MOL000449 | Stigmasterol    | Nuclear receptor coactivator 2                         | NCOA2  |
| SQ | MOL000449 | Stigmasterol    | Alcohol dehydrogenase 1C                               | ADH1C  |
| SQ | MOL000449 | Stigmasterol    | Ig gamma-1 chain C region                              | IGHG1  |
| SQ | MOL000449 | Stigmasterol    | Retinoic acid receptor RXR-alpha                       | RXRA   |
| SQ | MOL000449 | Stigmasterol    | Nuclear receptor coactivator 1                         | NCOA1  |
| SQ | MOL000449 | Stigmasterol    | Prostaglandin G/H synthase 1                           | PTGS1  |
| SQ | MOL000449 | Stigmasterol    | Prostaglandin G/H synthase 2                           | PTGS2  |
| SQ | MOL000449 | Stigmasterol    | Alpha-2A adrenergic receptor                           | ADRA2A |
| SQ | MOL000449 | Stigmasterol    | Sodium-dependent noradrenaline transporter             | SLC6A2 |
| SQ | MOL000449 | Stigmasterol    | Sodium-dependent dopamine transporter                  | SLC6A3 |
| SQ | MOL000449 | Stigmasterol    | Beta-2 adrenergic receptor                             | ADRB2  |
| SQ | MOL000449 | Stigmasterol    | Aldose reductase                                       | AR     |
| SQ | MOL000449 | Stigmasterol    | Urokinase-type plasminogen activator                   | PLAU   |
| SQ | MOL000449 | Stigmasterol    | Leukotriene A-4 hydrolase                              | LTA4H  |
| SQ | MOL000449 | Stigmasterol    | Amine oxidase [flavin-containing] B                    | MAOB   |
| SQ | MOL000449 | Stigmasterol    | Amine oxidase [flavin-containing] A                    | MAOA   |
| SQ | MOL000449 | Stigmasterol    | mRNA of PKA Catalytic Subunit C-alpha                  | PRKACA |
| SQ | MOL000449 | Stigmasterol    | Chymotrypsinogen B                                     | CTRB1  |
| SQ | MOL000449 | Stigmasterol    | Muscarinic acetylcholine receptor M3                   | CHRM3  |
| SQ | MOL000449 | Stigmasterol    | Muscarinic acetylcholine receptor M1                   | CHRM1  |
| SQ | MOL000449 | Stigmasterol    | Beta-1 adrenergic receptor                             | ADRB1  |
| SQ | MOL000449 | Stigmasterol    | Sodium channel protein type 5 subunit alpha            | SCN5A  |
| SQ | MOL000449 | Stigmasterol    | 5-hydroxytryptamine 2A receptor                        | HTR2A  |
| SQ | MOL000449 | Stigmasterol    | Alpha-1A adrenergic receptor                           | ADRA1A |
| SQ | MOL000449 | Stigmasterol    | Gamma-aminobutyric-acid receptor alpha-3 subunit       | GABRA3 |
| SQ | MOL000449 | Stigmasterol    | Muscarinic acetylcholine receptor M2                   | CHRM2  |
| SQ | MOL000449 | Stigmasterol    | Alpha-1B adrenergic receptor                           | ADRA1B |
| SQ | MOL000449 | Stigmasterol    | Gamma-aminobutyric acid receptor subunit alpha-1       | GABRA1 |
| SQ | MOL000449 | Stigmasterol    | Neuronal acetylcholine receptor protein, alpha-7 chain | CHRNA7 |
| SQ | MOL002879 | Diop            | Sodium channel protein type 5 subunit alpha            | SCN5A  |
| SQ | MOL002879 | Diop            | Beta-2 adrenergic receptor                             | ADRB2  |
| SQ | MOL002879 | Diop            | Muscarinic acetylcholine receptor M3                   | CHRM3  |
| SQ | MOL001494 | Mandenol        | Prostaglandin G/H synthase 1                           | PTGS1  |
| SQ | MOL001494 | Mandenol        | Prostaglandin G/H synthase 2                           | PTGS2  |
| SQ | MOL001494 | Mandenol        | Nuclear receptor coactivator 2                         | NCOA2  |
| SQ | MOL000358 | beta-sitosterol | Progesterone receptor                                  | PGR    |
| SQ | MOL000358 | beta-sitosterol | Nuclear receptor coactivator 2                         | NCOA2  |
| SQ | MOL000358 | beta-sitosterol | Prostaglandin G/H synthase 1                           | PTGS1  |



|    |           |                 |                                                                                 |         |
|----|-----------|-----------------|---------------------------------------------------------------------------------|---------|
| SQ | MOL000358 | beta-sitosterol | Prostaglandin G/H synthase 2                                                    | PTGS2   |
| SQ | MOL000358 | beta-sitosterol | Heat shock protein HSP 90                                                       | HSP90   |
| SQ | MOL000358 | beta-sitosterol | Phosphatidylinositol-4,5-bisphosphate 3-kinase catalytic subunit, gamma isoform | PIK3CG  |
| SQ | MOL000358 | beta-sitosterol | Potassium voltage-gated channel subfamily H member 2                            | KCNH2   |
| SQ | MOL000358 | beta-sitosterol | mRNA of PKA Catalytic Subunit C-alpha                                           | PRKACA  |
| SQ | MOL000358 | beta-sitosterol | Dopamine D1 receptor                                                            | DRD1    |
| SQ | MOL000358 | beta-sitosterol | Muscarinic acetylcholine receptor M3                                            | CHRM3   |
| SQ | MOL000358 | beta-sitosterol | Muscarinic acetylcholine receptor M1                                            | CHRM1   |
| SQ | MOL000358 | beta-sitosterol | Sodium channel protein type 5 subunit alpha                                     | SCN5A   |
| SQ | MOL000358 | beta-sitosterol | Gamma-aminobutyric-acid receptor alpha-2 subunit                                | GABRA2  |
| SQ | MOL000358 | beta-sitosterol | Muscarinic acetylcholine receptor M4                                            | CHRM4   |
| SQ | MOL000358 | beta-sitosterol | CGMP-inhibited 3',5'-cyclic phosphodiesterase A                                 | PDE3A   |
| SQ | MOL000358 | beta-sitosterol | 5-hydroxytryptamine 2A receptor                                                 | HTR2A   |
| SQ | MOL000358 | beta-sitosterol | Gamma-aminobutyric-acid receptor alpha-5 subunit                                | GABRA5  |
| SQ | MOL000358 | beta-sitosterol | Alpha-1A adrenergic receptor                                                    | ADRA1A  |
| SQ | MOL000358 | beta-sitosterol | Gamma-aminobutyric-acid receptor alpha-3 subunit                                | GABRA3  |
| SQ | MOL000358 | beta-sitosterol | Muscarinic acetylcholine receptor M2                                            | CHRM2   |
| SQ | MOL000358 | beta-sitosterol | Alpha-1B adrenergic receptor                                                    | ADRA1B  |
| SQ | MOL000358 | beta-sitosterol | Beta-2 adrenergic receptor                                                      | ADRB2   |
| SQ | MOL000358 | beta-sitosterol | Neuronal acetylcholine receptor subunit                                         | CHRNA2  |
| SQ | MOL000358 | beta-sitosterol | Sodium-dependent serotonin transporter                                          | SLC6A4  |
| SQ | MOL000358 | beta-sitosterol | Mu-type opioid receptor                                                         | OPRM1   |
| SQ | MOL000358 | beta-sitosterol | Gamma-aminobutyric acid receptor subunit alpha-1                                | GABRA1  |
| SQ | MOL000358 | beta-sitosterol | Neuronal acetylcholine receptor protein, alpha-7 chain                          | CHRNA7  |
| SQ | MOL000358 | beta-sitosterol | Apoptosis regulator Bcl-2                                                       | BCL2    |
| SQ | MOL000358 | beta-sitosterol | Apoptosis regulator BAX                                                         | BAX     |
| SQ | MOL000358 | beta-sitosterol | Caspase-9                                                                       | CASP9   |
| SQ | MOL000358 | beta-sitosterol | Transcription factor AP-1                                                       | TFAP1   |
| SQ | MOL000358 | beta-sitosterol | Caspase-3                                                                       | CASP3   |
| SQ | MOL000358 | beta-sitosterol | Caspase-8                                                                       | CASP8   |
| SQ | MOL000358 | beta-sitosterol | Protein kinase C alpha type                                                     | PRKCA   |
| SQ | MOL000358 | beta-sitosterol | Transforming growth factor beta-1                                               | TGFB1   |
| SQ | MOL000358 | beta-sitosterol | Serum paraoxonase/arylesterase 1                                                | PON1    |
| SQ | MOL000358 | beta-sitosterol | Microtubule-associated protein 2                                                | MAP2    |
| SQ | MOL005344 | ginsenoside rh2 | Apoptosis regulator BAX                                                         | BAX     |
| SQ | MOL005344 | ginsenoside rh2 | Tumor necrosis factor                                                           | TNF     |
| SQ | MOL005344 | ginsenoside rh2 | Caspase-3                                                                       | CASP3   |
| SQ | MOL005344 | ginsenoside rh2 | Prostaglandin G/H synthase 2                                                    | PTGS2   |
| SQ | MOL005344 | ginsenoside rh2 | NF-kappa-B inhibitor alpha                                                      | NFKBIA  |
| SQ | MOL005344 | ginsenoside rh2 | Interleukin-1 beta                                                              | IL1B    |
| SQ | MOL005344 | ginsenoside rh2 | Caspase-1                                                                       | CASP1   |
| SQ | MOL005344 | ginsenoside rh2 | Interferon gamma                                                                | IFNG    |
| SQ | MOL005344 | ginsenoside rh2 | Pituitary adenylate cyclase-activating polypeptide                              | ADCYAP1 |
| SQ | MOL005344 | ginsenoside rh2 | Dual specificity mitogen-activated protein kinase kinase 4                      | MAP2K4  |
| SQ | MOL005344 | ginsenoside rh2 | Solute carrier family 2, facilitated glucose transporter member 4               | SLC2A4  |
| SQ | MOL001792 | DFV             | Prostaglandin G/H synthase 1                                                    | PTGS1   |
| SQ | MOL001792 | DFV             | Estrogen receptor                                                               | ER      |
| SQ | MOL001792 | DFV             | Prostaglandin G/H synthase 2                                                    | PTGS2   |
| SQ | MOL001792 | DFV             | Retinoic acid receptor RXR-alpha                                                | RXRA    |

|    |           |                 |                                                                                 |        |
|----|-----------|-----------------|---------------------------------------------------------------------------------|--------|
| SQ | MOL001792 | DFV             | Beta-2 adrenergic receptor                                                      | ADRB2  |
| SQ | MOL001792 | DFV             | Heat shock protein HSP 90                                                       | HSP90  |
| SQ | MOL001792 | DFV             | Phosphatidylinositol-4,5-bisphosphate 3-kinase catalytic subunit, gamma isoform | PIK3CG |
| SQ | MOL001792 | DFV             | mRNA of PKA Catalytic Subunit C-alpha                                           | PRKACA |
| SQ | MOL001792 | DFV             | Beta-lactamase                                                                  | BLAC   |
| SQ | MOL001792 | DFV             | Amine oxidase [flavin-containing] B                                             | MAOB   |
| SQ | MOL001792 | DFV             | Sodium-dependent serotonin transporter                                          | SLC6A4 |
| SQ | MOL001792 | DFV             | cAMP-dependent protein kinase inhibitor                                         | PKIA   |
| DG | MOL000449 | Stigmasterol    | Progesterone receptor                                                           | PGR    |
| DG | MOL000449 | Stigmasterol    | Mineralocorticoid receptor                                                      | NR3C2  |
| DG | MOL000449 | Stigmasterol    | Nuclear receptor coactivator 2                                                  | NCOA2  |
| DG | MOL000449 | Stigmasterol    | Alcohol dehydrogenase 1C                                                        | ADH1C  |
| DG | MOL000449 | Stigmasterol    | Ig gamma-1 chain C region                                                       | IGHG1  |
| DG | MOL000449 | Stigmasterol    | Retinoic acid receptor RXR-alpha                                                | RXRA   |
| DG | MOL000449 | Stigmasterol    | Nuclear receptor coactivator 1                                                  | NCOA1  |
| DG | MOL000449 | Stigmasterol    | Prostaglandin G/H synthase 1                                                    | PTGS1  |
| DG | MOL000449 | Stigmasterol    | Prostaglandin G/H synthase 2                                                    | PTGS2  |
| DG | MOL000449 | Stigmasterol    | Alpha-2A adrenergic receptor                                                    | ADRA2A |
| DG | MOL000358 | beta-sitosterol | Progesterone receptor                                                           | PGR    |
| DG | MOL000358 | beta-sitosterol | Nuclear receptor coactivator 2                                                  | NCOA2  |
| DG | MOL000358 | beta-sitosterol | Prostaglandin G/H synthase 1                                                    | PTGS1  |
| DG | MOL000358 | beta-sitosterol | Prostaglandin G/H synthase 2                                                    | PTGS2  |
| DG | MOL000358 | beta-sitosterol | Heat shock protein HSP 90                                                       | HSP90  |
| DG | MOL000358 | beta-sitosterol | Phosphatidylinositol-4,5-bisphosphate 3-kinase catalytic subunit, gamma isoform | PIK3CG |
| DG | MOL000358 | beta-sitosterol | Potassium voltage-gated channel subfamily H member 2                            | KCNH2  |
| DG | MOL000358 | beta-sitosterol | mRNA of PKA Catalytic Subunit C-alpha                                           | PRKACA |
| DG | MOL000358 | beta-sitosterol | Dopamine D1 receptor                                                            | DRD1   |
| DG | MOL000358 | beta-sitosterol | Muscarinic acetylcholine receptor M3                                            | CHRM3  |
| DG | MOL000358 | beta-sitosterol | Muscarinic acetylcholine receptor M1                                            | CHRM1  |
| DG | MOL000358 | beta-sitosterol | Sodium channel protein type 5 subunit alpha                                     | SCN5A  |
| DG | MOL000358 | beta-sitosterol | Gamma-aminobutyric-acid receptor alpha-2 subunit                                | GABRA2 |
| DG | MOL000358 | beta-sitosterol | Muscarinic acetylcholine receptor M4                                            | CHRM4  |
| DG | MOL000358 | beta-sitosterol | CGMP-inhibited 3',5'-cyclic phosphodiesterase A                                 | PDE3A  |
| DG | MOL000358 | beta-sitosterol | 5-hydroxytryptamine 2A receptor                                                 | HTR2A  |
| DG | MOL000358 | beta-sitosterol | Gamma-aminobutyric-acid receptor alpha-5 subunit                                | GABRA5 |
| DG | MOL000358 | beta-sitosterol | Alpha-1A adrenergic receptor                                                    | ADRA1A |
| DG | MOL000358 | beta-sitosterol | Gamma-aminobutyric-acid receptor alpha-3 subunit                                | GABRA3 |
| DG | MOL000358 | beta-sitosterol | Muscarinic acetylcholine receptor M2                                            | CHRM2  |
| DG | MOL000358 | beta-sitosterol | Alpha-1B adrenergic receptor                                                    | ADRA1B |
| DG | MOL000358 | beta-sitosterol | Beta-2 adrenergic receptor                                                      | ADRB2  |
| DG | MOL000358 | beta-sitosterol | Neuronal acetylcholine receptor subunit                                         | CHRNA2 |
| DG | MOL000358 | beta-sitosterol | Sodium-dependent serotonin transporter                                          | SLC6A4 |
| DG | MOL000358 | beta-sitosterol | Mu-type opioid receptor                                                         | OPRM1  |
| DG | MOL000358 | beta-sitosterol | Gamma-aminobutyric acid receptor subunit alpha-1                                | GABRA1 |
| DG | MOL000358 | beta-sitosterol | Neuronal acetylcholine receptor protein, alpha-7 chain                          | CHRNA7 |
| DG | MOL000358 | beta-sitosterol | Apoptosis regulator Bcl-2                                                       | BCL2   |
| DG | MOL000358 | beta-sitosterol | Apoptosis regulator BAX                                                         | BAX    |
| DG | MOL000358 | beta-sitosterol | Caspase-9                                                                       | CASP9  |
| DG | MOL000358 | beta-sitosterol | Transcription factor AP-1                                                       | TFAP1  |
| DG | MOL000358 | beta-sitosterol | Caspase-3                                                                       | CASP3  |
| DG | MOL000358 | beta-sitosterol | Caspase-8                                                                       | CASP8  |

|    |           |                          |                                                      |        |
|----|-----------|--------------------------|------------------------------------------------------|--------|
| DG | MOL000358 | beta-sitosterol          | Protein kinase C alpha type                          | PRKCA  |
| DG | MOL000358 | beta-sitosterol          | Transforming growth factor beta-1                    | TGFB1  |
| DG | MOL000358 | beta-sitosterol          | Serum paraoxonase/arylesterase 1                     | PON1   |
| DG | MOL000358 | beta-sitosterol          | Microtubule-associated protein 2                     | MAP2   |
| HQ | MOL000378 | 7-O-methylisomucronulato | Nitric oxide synthase, inducible                     | NOS2   |
| HQ | MOL000378 | 7-O-methylisomucronulato | Prostaglandin G/H synthase 1                         | PTGS1  |
| HQ | MOL000378 | 7-O-methylisomucronulato | Dopamine D1 receptor                                 | DRD1   |
| HQ | MOL000378 | 7-O-methylisomucronulato | Muscarinic acetylcholine receptor M3                 | CHRM3  |
| HQ | MOL000378 | 7-O-methylisomucronulato | Thrombin                                             | F2     |
| HQ | MOL000378 | 7-O-methylisomucronulato | Potassium voltage-gated channel subfamily H member 2 | KCNH2  |
| HQ | MOL000378 | 7-O-methylisomucronulato | Muscarinic acetylcholine receptor M1                 | CHRM1  |
| HQ | MOL000378 | 7-O-methylisomucronulato | Estrogen receptor                                    | ER     |
| HQ | MOL000378 | 7-O-methylisomucronulato | Androgen receptor                                    | AR     |
| HQ | MOL000378 | 7-O-methylisomucronulato | Beta-1 adrenergic receptor                           | ADRB1  |
| HQ | MOL000378 | 7-O-methylisomucronulato | Sodium channel protein type 5 subunit alpha          | SCN5A  |
| HQ | MOL000378 | 7-O-methylisomucronulato | Peroxisome proliferator activated receptor gamma     | PPARG  |
| HQ | MOL000378 | 7-O-methylisomucronulato | Coagulation factor Xa                                | F10    |
| HQ | MOL000378 | 7-O-methylisomucronulato | Muscarinic acetylcholine receptor M5                 | CHRM5  |
| HQ | MOL000378 | 7-O-methylisomucronulato | Prostaglandin G/H synthase 2                         | PTGS2  |
| HQ | MOL000378 | 7-O-methylisomucronulato | Nitric-oxide synthase, endothelial                   | NOS3   |
| HQ | MOL000378 | 7-O-methylisomucronulato | Alpha-2C adrenergic receptor                         | ADRA2C |
| HQ | MOL000378 | 7-O-methylisomucronulato | Muscarinic acetylcholine receptor M4                 | CHRM4  |
| HQ | MOL000378 | 7-O-methylisomucronulato | Retinoic acid receptor RXR-alpha                     | RXRA   |
| HQ | MOL000378 | 7-O-methylisomucronulato | Delta-type opioid receptor                           | OPRD1  |
| HQ | MOL000378 | 7-O-methylisomucronulato | CGMP-inhibited 3',5'-cyclic phosphodiesterase A      | PDE3A  |
| HQ | MOL000378 | 7-O-methylisomucronulato | 5-hydroxytryptamine 2A receptor                      | HTR2A  |
| HQ | MOL000378 | 7-O-methylisomucronulato | Alpha-1A adrenergic receptor                         | ADRA1A |
| HQ | MOL000378 | 7-O-methylisomucronulato | Muscarinic acetylcholine receptor M2                 | CHRM2  |
| HQ | MOL000378 | 7-O-methylisomucronulato | Alpha-1B adrenergic receptor                         | ADRA1B |
| HQ | MOL000378 | 7-O-methylisomucronulato | Sodium-dependent dopamine transporter                | SLC6A3 |
| HQ | MOL000378 | 7-O-methylisomucronulato | Beta-2 adrenergic receptor                           | ADRB2  |
| HQ | MOL000378 | 7-O-methylisomucronulato | Alpha-1D adrenergic receptor                         | ADRA1D |
| HQ | MOL000378 | 7-O-methylisomucronulato | Sodium-dependent serotonin transporter               | SLC6A4 |

|    |           |                          |                                                      |        |
|----|-----------|--------------------------|------------------------------------------------------|--------|
| HQ | MOL000378 | 7-O-methylisomucronulato | Estrogen receptor beta                               | ESR2   |
| HQ | MOL000378 | 7-O-methylisomucronulato | Gamma-aminobutyric acid receptor subunit alpha-1     | GABRA1 |
| HQ | MOL000378 | 7-O-methylisomucronulato | Dipeptidyl peptidase IV                              | DPP4   |
| HQ | MOL000378 | 7-O-methylisomucronulato | Mitogen-activated protein kinase 14                  | MAPK14 |
| HQ | MOL000378 | 7-O-methylisomucronulato | Glycogen synthase kinase-3 beta                      | GSK3B  |
| HQ | MOL000378 | 7-O-methylisomucronulato | Heat shock protein HSP 90                            | HSP90  |
| HQ | MOL000378 | 7-O-methylisomucronulato | Cell division protein kinase 2                       | CDK2   |
| HQ | MOL000378 | 7-O-methylisomucronulato | Serine/threonine-protein kinase Chk1                 | CHEK1  |
| HQ | MOL000378 | 7-O-methylisomucronulato | mRNA of PKA Catalytic Subunit C-alpha                | PRKACA |
| HQ | MOL000378 | 7-O-methylisomucronulato | Retinoic acid receptor RXR-beta                      | RXRB   |
| HQ | MOL000378 | 7-O-methylisomucronulato | Trypsin-1                                            | TRY1   |
| HQ | MOL000378 | 7-O-methylisomucronulato | Proto-oncogene serine/threonine-protein kinase Pim-1 | PIM1   |
| HQ | MOL000378 | 7-O-methylisomucronulato | Cyclin-A2                                            | CCNA2  |
| HQ | MOL000378 | 7-O-methylisomucronulato | Nuclear receptor coactivator 2                       | NCOA2  |
| HQ | MOL000378 | 7-O-methylisomucronulato | Calcium-activated potassium channel subunit alpha 1  | KCNMA1 |
| HQ | MOL000378 | 7-O-methylisomucronulato | Calmodulin                                           | CALM   |
| HQ | MOL000392 | formononetin             | Nitric oxide synthase, inducible                     | NOS2   |
| HQ | MOL000392 | formononetin             | Prostaglandin G/H synthase 1                         | PTGS1  |
| HQ | MOL000392 | formononetin             | Muscarinic acetylcholine receptor M1                 | CHRM1  |
| HQ | MOL000392 | formononetin             | Estrogen receptor                                    | ER     |
| HQ | MOL000392 | formononetin             | Androgen receptor                                    | AR     |
| HQ | MOL000392 | formononetin             | Peroxisome proliferator activated receptor gamma     | PPARG  |
| HQ | MOL000392 | formononetin             | Prostaglandin G/H synthase 2                         | PTGS2  |
| HQ | MOL000392 | formononetin             | Retinoic acid receptor RXR-alpha                     | RXRA   |
| HQ | MOL000392 | formononetin             | CGMP-inhibited 3',5'-cyclic phosphodiesterase A      | PDE3A  |
| HQ | MOL000392 | formononetin             | Alpha-1A adrenergic receptor                         | ADRA1A |
| HQ | MOL000392 | formononetin             | Sodium-dependent dopamine transporter                | SLC6A3 |
| HQ | MOL000392 | formononetin             | Beta-2 adrenergic receptor                           | ADRB2  |
| HQ | MOL000392 | formononetin             | Sodium-dependent serotonin transporter               | SLC6A4 |
| HQ | MOL000392 | formononetin             | Estrogen receptor beta                               | ESR2   |
| HQ | MOL000392 | formononetin             | Dipeptidyl peptidase IV                              | DPP4   |
| HQ | MOL000392 | formononetin             | Mitogen-activated protein kinase 14                  | MAPK14 |
| HQ | MOL000392 | formononetin             | Glycogen synthase kinase-3 beta                      | GSK3B  |
| HQ | MOL000392 | formononetin             | Heat shock protein HSP 90                            | HSP90  |
| HQ | MOL000392 | formononetin             | Cell division protein kinase 2                       | CDK2   |
| HQ | MOL000392 | formononetin             | Amine oxidase [flavin-containing] B                  | MAOB   |
| HQ | MOL000392 | formononetin             | Serine/threonine-protein kinase Chk1                 | CHEK1  |
| HQ | MOL000392 | formononetin             | mRNA of PKA Catalytic Subunit C-alpha                | PRKACA |
| HQ | MOL000392 | formononetin             | Trypsin-1                                            | TRY1   |
| HQ | MOL000392 | formononetin             | Proto-oncogene serine/threonine-protein kinase Pim-1 | PIM1   |
| HQ | MOL000392 | formononetin             | Cyclin-A2                                            | CCNA2  |
| HQ | MOL000392 | formononetin             | Calmodulin                                           | CALM   |

|    |           |                                                                      |                                                                      |         |
|----|-----------|----------------------------------------------------------------------|----------------------------------------------------------------------|---------|
| HQ | MOL000392 | formononetin                                                         | cAMP-dependent protein kinase inhibitor                              | PKIA    |
| HQ | MOL000392 | formononetin                                                         | Thrombin                                                             | F2      |
| HQ | MOL000392 | formononetin                                                         | Nitric-oxide synthase, endothelial                                   | NOS3    |
| HQ | MOL000392 | formononetin                                                         | Acetylcholinesterase                                                 | ACHE    |
| HQ | MOL000392 | formononetin                                                         | Beta-lactamase                                                       | BLAC    |
| HQ | MOL000392 | formononetin                                                         | Transcription factor AP-1                                            | TFAP1   |
| HQ | MOL000392 | formononetin                                                         | Peroxisome proliferator-activated receptor<br>gamma                  | PPARG   |
| HQ | MOL000392 | formononetin                                                         | Interleukin-4                                                        | IL4     |
| HQ | MOL000392 | formononetin                                                         | NAD-dependent deacetylase sirtuin-1                                  | SIRT1   |
| HQ | MOL000392 | formononetin                                                         | ATP synthase subunit beta, mitochondrial                             | ATP5F1B |
| HQ | MOL000392 | formononetin                                                         | NADH-ubiquinone oxidoreductase chain 6                               | MT-ND6  |
| HQ | MOL000392 | formononetin                                                         | 3 beta-hydroxysteroid dehydrogenase/Delta 5-<br>->4-isomerase type 2 | HSD3B2  |
| HQ | MOL000392 | formononetin                                                         | 3 beta-hydroxysteroid dehydrogenase/Delta 5-<br>->4-isomerase type 1 | HSD3B1  |
| HQ | MOL000433 | FA                                                                   | Cell division protein kinase 2                                       | CDK2    |
| HQ | MOL000433 | FA                                                                   | Thrombin                                                             | F2      |
| HQ | MOL000433 | FA                                                                   | Glycogen synthase kinase-3 beta                                      | GSK3B   |
| HQ | MOL000380 | (6aR,11aR)-9,10-dimethoxy-6a,11a-dihydro-6H-benzofurano[3,2-<br>-1,1 | Nitric oxide synthase, inducible                                     | NOS2    |
| HQ | MOL000380 | (6aR,11aR)-9,10-dimethoxy-6a,11a-dihydro-6H-benzofurano[3,2-<br>-1,1 | Prostaglandin G/H synthase 1                                         | PTGS1   |
| HQ | MOL000380 | (6aR,11aR)-9,10-dimethoxy-6a,11a-dihydro-6H-benzofurano[3,2-<br>-1,1 | Muscarinic acetylcholine receptor M3                                 | CHRM3   |
| HQ | MOL000380 | (6aR,11aR)-9,10-dimethoxy-6a,11a-dihydro-6H-benzofurano[3,2-<br>-1,1 | Thrombin                                                             | F2      |
| HQ | MOL000380 | (6aR,11aR)-9,10-dimethoxy-6a,11a-dihydro-6H-benzofurano[3,2-<br>-1,1 | Muscarinic acetylcholine receptor M1                                 | CHRM1   |
| HQ | MOL000380 | (6aR,11aR)-9,10-dimethoxy-6a,11a-dihydro-6H-benzofurano[3,2-<br>-1,1 | Estrogen receptor                                                    | ER      |
| HQ | MOL000380 | (6aR,11aR)-9,10-dimethoxy-6a,11a-dihydro-6H-benzofurano[3,2-<br>-1,1 | Sodium channel protein type 5 subunit alpha                          | SCN5A   |
| HQ | MOL000380 | (6aR,11aR)-9,10-dimethoxy-6a,11a-dihydro-6H-benzofurano[3,2-<br>-1,1 | Prostaglandin G/H synthase 2                                         | PTGS2   |

|    |           |                                                                        |                                                        |        |
|----|-----------|------------------------------------------------------------------------|--------------------------------------------------------|--------|
| HQ | MOL000380 | (6aR,11aR)-9,10-dimethoxy-6a,11a-dihydro-6H-benzofurano[3,2-<br>11 2 1 | 5-hydroxytryptamine receptor 3A                        | HTR3A  |
| HQ | MOL000380 | (6aR,11aR)-9,10-dimethoxy-6a,11a-dihydro-6H-benzofurano[3,2-<br>11 2 1 | Retinoic acid receptor RXR-alpha                       | RXRA   |
| HQ | MOL000380 | (6aR,11aR)-9,10-dimethoxy-6a,11a-dihydro-6H-benzofurano[3,2-<br>11 2 1 | Acetylcholinesterase                                   | ACHE   |
| HQ | MOL000380 | (6aR,11aR)-9,10-dimethoxy-6a,11a-dihydro-6H-benzofurano[3,2-<br>11 2 1 | Alpha-1B adrenergic receptor                           | ADRA1B |
| HQ | MOL000380 | (6aR,11aR)-9,10-dimethoxy-6a,11a-dihydro-6H-benzofurano[3,2-<br>11 2 1 | Beta-2 adrenergic receptor                             | ADRB2  |
| HQ | MOL000380 | (6aR,11aR)-9,10-dimethoxy-6a,11a-dihydro-6H-benzofurano[3,2-<br>11 2 1 | Alpha-1D adrenergic receptor                           | ADRA1D |
| HQ | MOL000380 | (6aR,11aR)-9,10-dimethoxy-6a,11a-dihydro-6H-benzofurano[3,2-<br>11 2 1 | Gamma-aminobutyric acid receptor subunit alpha-1       | GABRA1 |
| HQ | MOL000380 | (6aR,11aR)-9,10-dimethoxy-6a,11a-dihydro-6H-benzofurano[3,2-<br>11 2 1 | Heat shock protein HSP 90                              | HSP90  |
| HQ | MOL000380 | (6aR,11aR)-9,10-dimethoxy-6a,11a-dihydro-6H-benzofurano[3,2-<br>11 2 1 | Neuronal acetylcholine receptor protein, alpha-7 chain | CHRNA7 |
| HQ | MOL000380 | (6aR,11aR)-9,10-dimethoxy-6a,11a-dihydro-6H-benzofurano[3,2-<br>11 2 1 | Trypsin-1                                              | TRY1   |
| HQ | MOL000380 | (6aR,11aR)-9,10-dimethoxy-6a,11a-dihydro-6H-benzofurano[3,2-<br>11 2 1 | Nuclear receptor coactivator 2                         | NCOA2  |
| HQ | MOL000380 | (6aR,11aR)-9,10-dimethoxy-6a,11a-dihydro-6H-benzofurano[3,2-<br>11 2 1 | Nuclear receptor coactivator 1                         | NCOA1  |

|    |           |                                                                        |                                                               |        |
|----|-----------|------------------------------------------------------------------------|---------------------------------------------------------------|--------|
| HQ | MOL000380 | (6aR,11aR)-9,10-dimethoxy-6a,11a-dihydro-6H-benzofurano[3,2-<br>11-2,1 | Calmodulin                                                    | CALM   |
| HQ | MOL000380 | (6aR,11aR)-9,10-dimethoxy-6a,11a-dihydro-6H-benzofurano[3,2-<br>11-2,1 | Muscarinic acetylcholine receptor M4                          | CHRM4  |
| HQ | MOL000211 | Mairin                                                                 | Progesterone receptor                                         | PGR    |
| HQ | MOL000371 | 3,9-di-O-                                                              | Nitric oxide synthase, inducible                              | NOS2   |
| HQ | MOL000371 | 3,9-di-O-                                                              | Prostaglandin G/H synthase 1                                  | PTGS1  |
| HQ | MOL000371 | 3,9-di-O-                                                              | Muscarinic acetylcholine receptor M3                          | CHRM3  |
| HQ | MOL000371 | 3,9-di-O-                                                              | Thrombin                                                      | F2     |
| HQ | MOL000371 | 3,9-di-O-                                                              | Muscarinic acetylcholine receptor M1                          | CHRM1  |
| HQ | MOL000371 | 3,9-di-O-                                                              | Estrogen receptor                                             | ER     |
| HQ | MOL000371 | 3,9-di-O-                                                              | Beta-1 adrenergic receptor                                    | ADRB1  |
| HQ | MOL000371 | 3,9-di-O-                                                              | Sodium channel protein type 5 subunit alpha                   | SCN5A  |
| HQ | MOL000371 | 3,9-di-O-                                                              | Prostaglandin G/H synthase 2                                  | PTGS2  |
| HQ | MOL000371 | 3,9-di-O-                                                              | Nitric-oxide synthase, endothelial                            | NOS3   |
| HQ | MOL000371 | 3,9-di-O-                                                              | 5-hydroxytryptamine receptor 3A                               | HTR3A  |
| HQ | MOL000371 | 3,9-di-O-                                                              | Alpha-2C adrenergic receptor                                  | ADRA2C |
| HQ | MOL000371 | 3,9-di-O-                                                              | Retinoic acid receptor RXR-alpha                              | RXRA   |
| HQ | MOL000371 | 3,9-di-O-                                                              | Acetylcholinesterase                                          | ACHE   |
| HQ | MOL000371 | 3,9-di-O-methyl<br>nissolin                                            | CGMP-inhibited 3',5'-cyclic<br>phosphodiesterase A            | PDE3A  |
| HQ | MOL000371 | 3,9-di-O-                                                              | Alpha-1B adrenergic receptor                                  | ADRA1B |
| HQ | MOL000371 | 3,9-di-O-                                                              | Beta-2 adrenergic receptor                                    | ADRB2  |
| HQ | MOL000371 | 3,9-di-O-                                                              | Alpha-1D adrenergic receptor                                  | ADRA1D |
| HQ | MOL000371 | 3,9-di-O-                                                              | Mu-type opioid receptor                                       | OPRM1  |
| HQ | MOL000371 | 3,9-di-O-methyl<br>nissolin                                            | Gamma-aminobutyric acid receptor subunit<br>alpha-1           | GABRA1 |
| HQ | MOL000371 | 3,9-di-O-                                                              | Trypsin-1                                                     | TRY1   |
| HQ | MOL000371 | 3,9-di-O-                                                              | Nuclear receptor coactivator 2                                | NCOA2  |
| HQ | MOL000371 | 3,9-di-O-                                                              | Calmodulin                                                    | CALM   |
| HQ | MOL000239 | Jaranol                                                                | Nitric oxide synthase, inducible                              | NOS2   |
| HQ | MOL000239 | Jaranol                                                                | Prostaglandin G/H synthase 1                                  | PTGS1  |
| HQ | MOL000239 | Jaranol                                                                | Androgen receptor                                             | AR     |
| HQ | MOL000239 | Jaranol                                                                | Sodium channel protein type 5 subunit alpha                   | SCN5A  |
| HQ | MOL000239 | Jaranol                                                                | Prostaglandin G/H synthase 2                                  | PTGS2  |
| HQ | MOL000239 | Jaranol                                                                | Estrogen receptor beta                                        | ESR2   |
| HQ | MOL000239 | Jaranol                                                                | Dipeptidyl peptidase IV                                       | DPP4   |
| HQ | MOL000239 | Jaranol                                                                | Heat shock protein HSP 90                                     | HSP90  |
| HQ | MOL000239 | Jaranol                                                                | Cell division protein kinase 2                                | CDK2   |
| HQ | MOL000239 | Jaranol                                                                | Serine/threonine-protein kinase Chk1                          | CHEK1  |
| HQ | MOL000239 | Jaranol                                                                | Trypsin-1                                                     | TRY1   |
| HQ | MOL000239 | Jaranol                                                                | Nuclear receptor coactivator 2                                | NCOA2  |
| HQ | MOL000239 | Jaranol                                                                | Calmodulin                                                    | CALM   |
| HQ | MOL000354 | isorhamnetin                                                           | Nitric oxide synthase, inducible                              | NOS2   |
| HQ | MOL000354 | isorhamnetin                                                           | Prostaglandin G/H synthase 1                                  | PTGS1  |
| HQ | MOL000354 | isorhamnetin                                                           | Estrogen receptor                                             | ER     |
| HQ | MOL000354 | isorhamnetin                                                           | Androgen receptor                                             | AR     |
| HQ | MOL000354 | isorhamnetin                                                           | Peroxisome proliferator activated receptor<br>gamma           | PPARG  |
| HQ | MOL000354 | isorhamnetin                                                           | Prostaglandin G/H synthase 2                                  | PTGS2  |
| HQ | MOL000354 | isorhamnetin                                                           | mRNA of Protein-tyrosine phosphatase, non-<br>receptor type 1 | PTPN1  |
| HQ | MOL000354 | isorhamnetin                                                           | Estrogen receptor beta                                        | ESR2   |
| HQ | MOL000354 | isorhamnetin                                                           | Dipeptidyl peptidase IV                                       | DPP4   |

|    |           |                                      |                                                                                 |        |
|----|-----------|--------------------------------------|---------------------------------------------------------------------------------|--------|
| HQ | MOL000354 | isorhamnetin                         | Mitogen-activated protein kinase 14                                             | MAPK14 |
| HQ | MOL000354 | isorhamnetin                         | Glycogen synthase kinase-3 beta                                                 | GSK3B  |
| HQ | MOL000354 | isorhamnetin                         | Heat shock protein HSP 90                                                       | HSP90  |
| HQ | MOL000354 | isorhamnetin                         | Cell division protein kinase 2                                                  | CDK2   |
| HQ | MOL000354 | isorhamnetin                         | Phosphatidylinositol-4,5-bisphosphate 3-kinase catalytic subunit, gamma isoform | PIK3CG |
| HQ | MOL000354 | isorhamnetin                         | mRNA of PKA Catalytic Subunit C-alpha                                           | PRKACA |
| HQ | MOL000354 | isorhamnetin                         | Trypsin-1                                                                       | TRY1   |
| HQ | MOL000354 | isorhamnetin                         | Proto-oncogene serine/threonine-protein kinase Pim-1                            | PIM1   |
| HQ | MOL000354 | isorhamnetin                         | Cyclin-A2                                                                       | CCNA2  |
| HQ | MOL000354 | isorhamnetin                         | Nuclear receptor coactivator 2                                                  | NCOA2  |
| HQ | MOL000354 | isorhamnetin                         | Calmodulin                                                                      | CALM   |
| HQ | MOL000354 | isorhamnetin                         | Glycogen phosphorylase, muscle form                                             | PYGM   |
| HQ | MOL000354 | isorhamnetin                         | Peroxisome proliferator activated receptor                                      | PPARD  |
| HQ | MOL000354 | isorhamnetin                         | Serine/threonine-protein kinase Chk1                                            | CHEK1  |
| HQ | MOL000354 | isorhamnetin                         | Aldose reductase                                                                | AR     |
| HQ | MOL000354 | isorhamnetin                         | Nuclear receptor coactivator 1                                                  | NCOA1  |
| HQ | MOL000354 | isorhamnetin                         | Coagulation factor VII                                                          | F7     |
| HQ | MOL000354 | isorhamnetin                         | Thrombin                                                                        | F2     |
| HQ | MOL000354 | isorhamnetin                         | Nitric-oxide synthase, endothelial                                              | NOS3   |
| HQ | MOL000354 | isorhamnetin                         | Acetylcholinesterase                                                            | ACHE   |
| HQ | MOL000354 | isorhamnetin                         | Gamma-aminobutyric acid receptor subunit alpha-1                                | GABRA1 |
| HQ | MOL000354 | isorhamnetin                         | Amine oxidase [flavin-containing] B                                             | MAOB   |
| HQ | MOL000354 | isorhamnetin                         | Glutamate receptor 2                                                            | GRIA2  |
| HQ | MOL000354 | isorhamnetin                         | Transcription factor p65                                                        | RELA   |
| HQ | MOL000354 | isorhamnetin                         | Xanthine dehydrogenase/oxidase                                                  | XDH    |
| HQ | MOL000354 | isorhamnetin                         | Neutrophil cytosol factor 1                                                     | NCF1   |
| HQ | MOL000354 | isorhamnetin                         | Oxidized low-density lipoprotein receptor 1                                     | OLR1   |
| HQ | MOL000439 | isomucronulatol-7,2'-di-O-glucosiole | DNA topoisomerase II                                                            | TOP2   |
| HQ | MOL000417 | Calycosin                            | Nitric oxide synthase, inducible                                                | NOS2   |
| HQ | MOL000417 | Calycosin                            | Prostaglandin G/H synthase 1                                                    | PTGS1  |
| HQ | MOL000417 | Calycosin                            | Estrogen receptor                                                               | ER     |
| HQ | MOL000417 | Calycosin                            | Androgen receptor                                                               | AR     |
| HQ | MOL000417 | Calycosin                            | Peroxisome proliferator activated receptor gamma                                | PPARG  |
| HQ | MOL000417 | Calycosin                            | Prostaglandin G/H synthase 2                                                    | PTGS2  |
| HQ | MOL000417 | Calycosin                            | Retinoic acid receptor RXR-alpha                                                | RXRA   |
| HQ | MOL000417 | Calycosin                            | CGMP-inhibited 3',5'-cyclic phosphodiesterase A                                 | PDE3A  |
| HQ | MOL000417 | Calycosin                            | Estrogen receptor beta                                                          | ESR2   |
| HQ | MOL000417 | Calycosin                            | Dipeptidyl peptidase IV                                                         | DPP4   |
| HQ | MOL000417 | Calycosin                            | Mitogen-activated protein kinase 14                                             | MAPK14 |
| HQ | MOL000417 | Calycosin                            | Glycogen synthase kinase-3 beta                                                 | GSK3B  |
| HQ | MOL000417 | Calycosin                            | Heat shock protein HSP 90                                                       | HSP90  |
| HQ | MOL000417 | Calycosin                            | Cell division protein kinase 2                                                  | CDK2   |
| HQ | MOL000417 | Calycosin                            | Serine/threonine-protein kinase Chk1                                            | CHEK1  |
| HQ | MOL000417 | Calycosin                            | mRNA of PKA Catalytic Subunit C-alpha                                           | PRKACA |
| HQ | MOL000417 | Calycosin                            | Trypsin-1                                                                       | TRY1   |
| HQ | MOL000417 | Calycosin                            | Proto-oncogene serine/threonine-protein kinase Pim-1                            | PIM1   |
| HQ | MOL000417 | Calycosin                            | Cyclin-A2                                                                       | CCNA2  |
| HQ | MOL000417 | Calycosin                            | Nuclear receptor coactivator 2                                                  | NCOA2  |
| HQ | MOL000417 | Calycosin                            | Calmodulin                                                                      | CALM   |
| HQ | MOL000417 | Calycosin                            | Beta-2 adrenergic receptor                                                      | ADRB2  |
| HQ | MOL000098 | quercetin                            | Prostaglandin G/H synthase 1                                                    | PTGS1  |
| HQ | MOL000098 | quercetin                            | Androgen receptor                                                               | AR     |



|    |           |           |                                                                                     |        |
|----|-----------|-----------|-------------------------------------------------------------------------------------|--------|
| HQ | MOL000098 | quercetin | Peroxisome proliferator activated receptor<br>gamma                                 | PPARG  |
| HQ | MOL000098 | quercetin | Prostaglandin G/H synthase 2                                                        | PTGS2  |
| HQ | MOL000098 | quercetin | Heat shock protein HSP 90                                                           | HSP90  |
| HQ | MOL000098 | quercetin | Phosphatidylinositol-4,5-bisphosphate 3-<br>kinase catalytic subunit, gamma isoform | PIK3CG |
| HQ | MOL000098 | quercetin | Nuclear receptor coactivator 2                                                      | NCOA2  |
| HQ | MOL000098 | quercetin | Dipeptidyl peptidase 4                                                              | DPP4   |
| HQ | MOL000098 | quercetin | Aldose reductase                                                                    | AR     |
| HQ | MOL000098 | quercetin | Trypsin-1                                                                           | TRY1   |
| HQ | MOL000098 | quercetin | DNA topoisomerase II                                                                | TOP2   |
| HQ | MOL000098 | quercetin | Thrombin                                                                            | F2     |
| HQ | MOL000098 | quercetin | Potassium voltage-gated channel subfamily H<br>member 2                             | KCNH2  |
| HQ | MOL000098 | quercetin | Sodium channel protein type 5 subunit alpha                                         | SCN5A  |
| HQ | MOL000098 | quercetin | Coagulation factor X                                                                | F10    |
| HQ | MOL000098 | quercetin | Beta-2 adrenergic receptor                                                          | ADRB2  |
| HQ | MOL000098 | quercetin | Stromelysin-1                                                                       | MMP3   |
| HQ | MOL000098 | quercetin | mRNA of PKA Catalytic Subunit C-alpha                                               | PRKACA |
| HQ | MOL000098 | quercetin | Coagulation factor VII                                                              | F7     |
| HQ | MOL000098 | quercetin | Nitric oxide synthase, endothelial                                                  | NOS3   |
| HQ | MOL000098 | quercetin | Retinoic acid receptor RXR-alpha                                                    | RXRA   |
| HQ | MOL000098 | quercetin | Acetylcholinesterase                                                                | ACHE   |
| HQ | MOL000098 | quercetin | Gamma-aminobutyric acid receptor subunit<br>alpha-1                                 | GABRA1 |
| HQ | MOL000098 | quercetin | Amine oxidase [flavin-containing] B                                                 | MAOB   |
| HQ | MOL000098 | quercetin | Transcription factor p65                                                            | RELA   |
| HQ | MOL000098 | quercetin | Epidermal growth factor receptor                                                    | EGFR   |
| HQ | MOL000098 | quercetin | RAC-alpha serine/threonine-protein kinase                                           | AKT1   |
| HQ | MOL000098 | quercetin | Vascular endothelial growth factor A                                                | VEGFA  |
| HQ | MOL000098 | quercetin | G1/S-specific cyclin-D1                                                             | CCND1  |
| HQ | MOL000098 | quercetin | Apoptosis regulator Bcl-2                                                           | BCL2   |
| HQ | MOL000098 | quercetin | Bcl-2-like protein 1                                                                | BCL2L1 |
| HQ | MOL000098 | quercetin | Proto-oncogene c-Fos                                                                | FOS    |
| HQ | MOL000098 | quercetin | Cyclin-dependent kinase inhibitor 1                                                 | CDKN1A |
| HQ | MOL000098 | quercetin | Eukaryotic translation initiation factor 6                                          | EIF6   |
| HQ | MOL000098 | quercetin | Apoptosis regulator BAX                                                             | BAX    |
| HQ | MOL000098 | quercetin | Caspase-9                                                                           | CASP9  |
| HQ | MOL000098 | quercetin | Urokinase-type plasminogen activator                                                | PLAU   |
| HQ | MOL000098 | quercetin | 72 kDa type IV collagenase                                                          | MMP2   |
| HQ | MOL000098 | quercetin | Matrix metalloproteinase-9                                                          | MMP9   |
| HQ | MOL000098 | quercetin | Mitogen-activated protein kinase 1                                                  | MAPK1  |
| HQ | MOL000098 | quercetin | Interleukin-10                                                                      | IL10   |
| HQ | MOL000098 | quercetin | Pro-epidermal growth factor                                                         | EGF    |
| HQ | MOL000098 | quercetin | Retinoblastoma-associated protein                                                   | RB1    |
| HQ | MOL000098 | quercetin | Tumor necrosis factor                                                               | TNF    |
| HQ | MOL000098 | quercetin | Transcription factor AP-1                                                           | TFAP1  |
| HQ | MOL000098 | quercetin | Interleukin-6                                                                       | IL6    |
| HQ | MOL000098 | quercetin | Cyclin-dependent kinase inhibitor 2A                                                | CDKN2A |
| HQ | MOL000098 | quercetin | Activator of 90 kDa heat shock protein<br>ATPase homolog 1                          | AHSA1  |
| HQ | MOL000098 | quercetin | Caspase-3                                                                           | CASP3  |
| HQ | MOL000098 | quercetin | Cellular tumor antigen p53                                                          | TP53   |
| HQ | MOL000098 | quercetin | ETS domain-containing protein Elk-1                                                 | ELK1   |
| HQ | MOL000098 | quercetin | NF-kappa-B inhibitor alpha                                                          | NFKBIA |
| HQ | MOL000098 | quercetin | NADPH--cytochrome P450 reductase                                                    | POR    |
| HQ | MOL000098 | quercetin | Ornithine decarboxylase                                                             | ODC1   |
| HQ | MOL000098 | quercetin | Xanthine dehydrogenase/oxidase                                                      | XDH    |
| HQ | MOL000098 | quercetin | Caspase-8                                                                           | CASP8  |

|    |           |           |                                                                                     |          |
|----|-----------|-----------|-------------------------------------------------------------------------------------|----------|
| HQ | MOL000098 | quercetin | DNA topoisomerase 1                                                                 | TOP1     |
| HQ | MOL000098 | quercetin | RAF proto-oncogene serine/threonine-protein kinase                                  | RAF1     |
| HQ | MOL000098 | quercetin | Superoxide dismutase [Cu-Zn]                                                        | SOD1     |
| HQ | MOL000098 | quercetin | Protein kinase C alpha type                                                         | PRKCA    |
| HQ | MOL000098 | quercetin | Interstitial collagenase                                                            | MMP1     |
| HQ | MOL000098 | quercetin | Hypoxia-inducible factor 1-alpha                                                    | HIF1A    |
| HQ | MOL000098 | quercetin | Signal transducer and activator of transcription 1-alpha/beta                       | STAT1    |
| HQ | MOL000098 | quercetin | Protein CBFA2T1                                                                     | RUNX1T1  |
| HQ | MOL000098 | quercetin | Probable E3 ubiquitin-protein ligase HERC5                                          | HERC5    |
| HQ | MOL000098 | quercetin | Cell division control protein 2 homolog                                             | CDK2     |
| HQ | MOL000098 | quercetin | 78 kDa glucose-regulated protein                                                    | GRP78    |
| HQ | MOL000098 | quercetin | Receptor tyrosine-protein kinase erbB-2                                             | ERBB2    |
| HQ | MOL000098 | quercetin | Peroxisome proliferator-activated receptor gamma                                    | PPARG    |
| HQ | MOL000098 | quercetin | Acetyl-CoA carboxylase 1                                                            | ACACA    |
| HQ | MOL000098 | quercetin | Heme oxygenase 1                                                                    | HMOX1    |
| HQ | MOL000098 | quercetin | Cytochrome P450 3A4                                                                 | CYP3A4   |
| HQ | MOL000098 | quercetin | Cytochrome P450 1A2                                                                 | CYP1A2   |
| HQ | MOL000098 | quercetin | Caveolin-1                                                                          | CAV1     |
| HQ | MOL000098 | quercetin | Myc proto-oncogene protein                                                          | MYC      |
| HQ | MOL000098 | quercetin | Tissue factor                                                                       | F3       |
| HQ | MOL000098 | quercetin | Gap junction alpha-1 protein                                                        | GJA1     |
| HQ | MOL000098 | quercetin | Cytochrome P450 1A1                                                                 | CYP1A1   |
| HQ | MOL000098 | quercetin | Intercellular adhesion molecule 1                                                   | ICAM1    |
| HQ | MOL000098 | quercetin | Interleukin-1 beta                                                                  | IL1B     |
| HQ | MOL000098 | quercetin | C-C motif chemokine 2                                                               | CCL2     |
| HQ | MOL000098 | quercetin | E-selectin                                                                          | SELE     |
| HQ | MOL000098 | quercetin | Vascular cell adhesion protein 1                                                    | VCAM1    |
| HQ | MOL000098 | quercetin | Prostaglandin E2 receptor EP3 subtype                                               | PTGER3   |
| HQ | MOL000098 | quercetin | Interleukin-8                                                                       | CXCL8    |
| HQ | MOL000098 | quercetin | Protein kinase C beta type                                                          | PRKCB    |
| HQ | MOL000098 | quercetin | Baculoviral IAP repeat-containing protein 5                                         | BIRC5    |
| HQ | MOL000098 | quercetin | Dual oxidase 2                                                                      | DUOX2    |
| HQ | MOL000098 | quercetin | Heat shock protein beta-1                                                           | HSPB1    |
| HQ | MOL000098 | quercetin | Transforming growth factor beta-1 proprotein                                        | TGFB1    |
| HQ | MOL000098 | quercetin | Estrogen sulfotransferase                                                           | STE      |
| HQ | MOL000098 | quercetin | Maltase-glucoamylase, intestinal                                                    | MGAM     |
| HQ | MOL000098 | quercetin | Interleukin-2                                                                       | IL2      |
| HQ | MOL000098 | quercetin | Nuclear receptor subfamily 1 group I member                                         | NR1I2    |
| HQ | MOL000098 | quercetin | Cytochrome P450 1B1                                                                 | CYP1B1   |
| HQ | MOL000098 | quercetin | G2/mitotic-specific cyclin-B1                                                       | CCNB1    |
| HQ | MOL000098 | quercetin | Tissue-type plasminogen activator                                                   | PLAT     |
| HQ | MOL000098 | quercetin | Thrombomodulin                                                                      | THBD     |
| HQ | MOL000098 | quercetin | Plasminogen activator inhibitor 1                                                   | SERPINE1 |
| HQ | MOL000098 | quercetin | Collagen alpha-1(I) chain                                                           | COL1A1   |
| HQ | MOL000098 | quercetin | Interferon gamma                                                                    | IFNG     |
| HQ | MOL000098 | quercetin | Arachidonate 5-lipoxygenase                                                         | ALOX5    |
| HQ | MOL000098 | quercetin | Phosphatidylinositol-3,4,5-trisphosphate 3-phosphatase and dual-specificity protein | PTEN     |
| HQ | MOL000098 | quercetin | Interleukin-1 alpha                                                                 | IL1A     |
| HQ | MOL000098 | quercetin | Myeloperoxidase                                                                     | MPO      |
| HQ | MOL000098 | quercetin | DNA topoisomerase 2-alpha                                                           | TOP2A    |
| HQ | MOL000098 | quercetin | Neutrophil cytosol factor 1                                                         | NCF1     |
| HQ | MOL000098 | quercetin | ATP-binding cassette sub-family G member 2                                          | ABCG2    |
| HQ | MOL000098 | quercetin | Hyaluronan synthase 2                                                               | HAS2     |
| HQ | MOL000098 | quercetin | Glutathione S-transferase P                                                         | GSTP1    |

|    |           |            |                                                                   |        |
|----|-----------|------------|-------------------------------------------------------------------|--------|
| HQ | MOL000098 | quercetin  | Nuclear factor erythroid 2-related factor 2                       | NFE2L2 |
| HQ | MOL000098 | quercetin  | NAD(P)H dehydrogenase [quinone] 1                                 | NQO1   |
| HQ | MOL000098 | quercetin  | Poly [ADP-ribose] polymerase 1                                    | PARP1  |
| HQ | MOL000098 | quercetin  | Aryl hydrocarbon receptor                                         | AHR    |
| HQ | MOL000098 | quercetin  | 26S proteasome non-ATPase regulatory subunit 3                    | PSMD3  |
| HQ | MOL000098 | quercetin  | Solute carrier family 2, facilitated glucose transporter member 4 | SLC2A4 |
| HQ | MOL000098 | quercetin  | Collagen alpha-1(III) chain                                       | COL3A1 |
| HQ | MOL000098 | quercetin  | DNA gyrase subunit B                                              | GRYB   |
| HQ | MOL000098 | quercetin  | C-X-C motif chemokine 11                                          | CXCL11 |
| HQ | MOL000098 | quercetin  | C-X-C motif chemokine 2                                           | CXCL2  |
| HQ | MOL000098 | quercetin  | DDB1- and CUL4-associated factor 5                                | DCAF5  |
| HQ | MOL000098 | quercetin  | Nuclear receptor subfamily 1 group I member                       | NR1I3  |
| HQ | MOL000098 | quercetin  | Serine/threonine-protein kinase Chk2                              | CHEK2  |
| HQ | MOL000098 | quercetin  | Insulin receptor                                                  | INSR   |
| HQ | MOL000098 | quercetin  | Claudin-4                                                         | CLDN4  |
| HQ | MOL000098 | quercetin  | Peroxisome proliferator-activated receptor                        | PPARA  |
| HQ | MOL000098 | quercetin  | Peroxisome proliferator-activated receptor                        | PPARD  |
| HQ | MOL000098 | quercetin  | Heat shock factor protein 1                                       | HSF1   |
| HQ | MOL000098 | quercetin  | C-reactive protein                                                | CRP    |
| HQ | MOL000098 | quercetin  | C-X-C motif chemokine 10                                          | CXCL10 |
| HQ | MOL000098 | quercetin  | Inhibitor of nuclear factor kappa-B kinase subunit alpha          | CHUK   |
| HQ | MOL000098 | quercetin  | Osteopontin                                                       | SPP1   |
| HQ | MOL000098 | quercetin  | Runt-related transcription factor 2                               | RUNX2  |
| HQ | MOL000098 | quercetin  | Ras association domain-containing protein 1                       | RASSF1 |
| HQ | MOL000098 | quercetin  | Transcription factor E2F1                                         | E2F1   |
| HQ | MOL000098 | quercetin  | Transcription factor E2F2                                         | E2F2   |
| HQ | MOL000098 | quercetin  | Prostatic acid phosphatase                                        | ACP3   |
| HQ | MOL000098 | quercetin  | Cathepsin D                                                       | CTSD   |
| HQ | MOL000098 | quercetin  | Insulin-like growth factor-binding protein 3                      | IGFBP3 |
| HQ | MOL000098 | quercetin  | Insulin-like growth factor II                                     | IGF2   |
| HQ | MOL000098 | quercetin  | CD40 ligand                                                       | CD40LG |
| HQ | MOL000098 | quercetin  | Interferon regulatory factor 1                                    | IRF1   |
| HQ | MOL000098 | quercetin  | Receptor tyrosine-protein kinase erbB-3                           | ERBB3  |
| HQ | MOL000098 | quercetin  | Serum paraoxonase/arylesterase 1                                  | PON1   |
| HQ | MOL000098 | quercetin  | Type I iodothyronine deiodinase                                   | DIO1   |
| HQ | MOL000098 | quercetin  | Procollagen C-endopeptidase enhancer 1                            | PCOLCE |
| HQ | MOL000098 | quercetin  | Puromycin-sensitive aminopeptidase                                | NPEPPS |
| HQ | MOL000098 | quercetin  | Hexokinase-2                                                      | HK2    |
| HQ | MOL000098 | quercetin  | Homeobox protein Nkx-3.1                                          | NKX3-1 |
| HQ | MOL000098 | quercetin  | Ras GTPase-activating protein 1                                   | RASA1  |
| HQ | MOL000098 | quercetin  | Peroxidase C1A                                                    | PRXC1A |
| HQ | MOL000098 | quercetin  | Glutathione S-transferase Mu 1                                    | GSTM1  |
| HQ | MOL000098 | quercetin  | Glutathione S-transferase Mu 2                                    | GSTM2  |
| HQ | MOL000422 | kaempferol | 26S proteasome non-ATPase regulatory subunit 3                    | PSMD3  |
| HQ | MOL000422 | kaempferol | Acetylcholinesterase                                              | ACHE   |
| HQ | MOL000422 | kaempferol | Activator of 90 kDa heat shock protein ATPase homolog 1           | AHSA1  |
| HQ | MOL000422 | kaempferol | Aldo-keto reductase family 1 member C3                            | AKR1C3 |
| HQ | MOL000422 | kaempferol | Alpha-1B adrenergic receptor                                      | ADRA1B |
| HQ | MOL000422 | kaempferol | Androgen receptor                                                 | AR     |
| HQ | MOL000422 | kaempferol | Antileukoprotease                                                 | SLPI   |
| HQ | MOL000422 | kaempferol | Apoptosis regulator BAX                                           | BAX    |
| HQ | MOL000422 | kaempferol | Apoptosis regulator Bcl-2                                         | BCL2   |
| HQ | MOL000422 | kaempferol | Arachidonate 5-lipoxygenase                                       | ALOX5  |
| HQ | MOL000422 | kaempferol | Aryl hydrocarbon receptor                                         | AHR    |

|    |           |            |                                                                                 |        |
|----|-----------|------------|---------------------------------------------------------------------------------|--------|
| HQ | MOL000422 | kaempferol | Calmodulin                                                                      | CALM   |
| HQ | MOL000422 | kaempferol | Caspase-3                                                                       | CASP3  |
| HQ | MOL000422 | kaempferol | Cell division control protein 2 homolog                                         | CDK2   |
| HQ | MOL000422 | kaempferol | Coagulation factor VII                                                          | F7     |
| HQ | MOL000422 | kaempferol | Cytochrome P450 1A1                                                             | CYP1A1 |
| HQ | MOL000422 | kaempferol | Cytochrome P450 1A2                                                             | CYP1A2 |
| HQ | MOL000422 | kaempferol | Cytochrome P450 1B1                                                             | CYP1B1 |
| HQ | MOL000422 | kaempferol | Cytochrome P450 3A4                                                             | CYP3A4 |
| HQ | MOL000422 | kaempferol | Dipeptidyl peptidase IV                                                         | DPP4   |
| HQ | MOL000422 | kaempferol | DNA topoisomerase II                                                            | TOP2   |
| HQ | MOL000422 | kaempferol | E-selectin                                                                      | SELE   |
| HQ | MOL000422 | kaempferol | Gamma-aminobutyric acid receptor subunit alpha-1                                | GABRA1 |
| HQ | MOL000422 | kaempferol | Gamma-aminobutyric-acid receptor alpha-2 subunit                                | GABRA2 |
| HQ | MOL000422 | kaempferol | Glutathione S-transferase Mu 1                                                  | GSTM1  |
| HQ | MOL000422 | kaempferol | Glutathione S-transferase Mu 2                                                  | GSTM2  |
| HQ | MOL000422 | kaempferol | Glutathione S-transferase P                                                     | GSTP1  |
| HQ | MOL000422 | kaempferol | Heat shock protein HSP 90                                                       | HSP90  |
| HQ | MOL000422 | kaempferol | Heme oxygenase 1                                                                | HMOX1  |
| HQ | MOL000422 | kaempferol | Hyaluronan synthase 2                                                           | HAS2   |
| HQ | MOL000422 | kaempferol | Inhibitor of nuclear factor kappa-B kinase subunit beta                         | IKBKB  |
| HQ | MOL000422 | kaempferol | Insulin receptor                                                                | INSR   |
| HQ | MOL000422 | kaempferol | Intercellular adhesion molecule 1                                               | ICAM1  |
| HQ | MOL000422 | kaempferol | Interstitial collagenase                                                        | MMP1   |
| HQ | MOL000422 | kaempferol | Mitogen-activated protein kinase 8                                              | MAPK8  |
| HQ | MOL000422 | kaempferol | mRNA of PKA Catalytic Subunit C-alpha                                           | PRKACA |
| HQ | MOL000422 | kaempferol | Muscarinic acetylcholine receptor M1                                            | CHRM1  |
| HQ | MOL000422 | kaempferol | Muscarinic acetylcholine receptor M2                                            | CHRM2  |
| HQ | MOL000422 | kaempferol | Nitric oxide synthase, inducible                                                | NOS2   |
| HQ | MOL000422 | kaempferol | Nitric-oxide synthase, endothelial                                              | NOS3   |
| HQ | MOL000422 | kaempferol | Nuclear receptor coactivator 2                                                  | NCOA2  |
| HQ | MOL000422 | kaempferol | Nuclear receptor subfamily 1 group I member                                     | NR1I2  |
| HQ | MOL000422 | kaempferol | Nuclear receptor subfamily 1 group I member                                     | NR1I3  |
| HQ | MOL000422 | kaempferol | Peroxidase C1A                                                                  | PRXC1A |
| HQ | MOL000422 | kaempferol | Peroxisome proliferator activated receptor gamma                                | PPARG  |
| HQ | MOL000422 | kaempferol | Peroxisome proliferator-activated receptor gamma                                | PPARG  |
| HQ | MOL000422 | kaempferol | Phosphatidylinositol-4,5-bisphosphate 3-kinase catalytic subunit, gamma isoform | PIK3CG |
| HQ | MOL000422 | kaempferol | Progesterone receptor                                                           | PGR    |
| HQ | MOL000422 | kaempferol | Prostaglandin G/H synthase 1                                                    | PTGS1  |
| HQ | MOL000422 | kaempferol | Prostaglandin G/H synthase 2                                                    | PTGS2  |
| HQ | MOL000422 | kaempferol | RAC-alpha serine/threonine-protein kinase                                       | AKT1   |
| HQ | MOL000422 | kaempferol | Serine/threonine-protein phosphatase 2B catalytic subunit alpha isoform         | PP3CB  |
| HQ | MOL000422 | kaempferol | Signal transducer and activator of transcription 1-alpha/beta                   | STAT1  |
| HQ | MOL000422 | kaempferol | Sodium-dependent noradrenaline transporter                                      | SLC6A2 |
| HQ | MOL000422 | kaempferol | Solute carrier family 2, facilitated glucose transporter member 4               | SLC2A4 |
| HQ | MOL000422 | kaempferol | Thrombin                                                                        | F2     |
| HQ | MOL000422 | kaempferol | Transcription factor AP-1                                                       | TFAP1  |
| HQ | MOL000422 | kaempferol | Transcription factor p65                                                        | RELA   |
| HQ | MOL000422 | kaempferol | Trypsin-1                                                                       | TRY1   |
| HQ | MOL000422 | kaempferol | Tumor necrosis factor                                                           | TNF    |
| HQ | MOL000422 | kaempferol | Type I iodothyronine deiodinase                                                 | DIO1   |
| HQ | MOL000422 | kaempferol | Vascular cell adhesion protein 1                                                | VCAM1  |

|    |           |                                                                                                                               |                                                     |        |
|----|-----------|-------------------------------------------------------------------------------------------------------------------------------|-----------------------------------------------------|--------|
| HQ | MOL000422 | kaempferol                                                                                                                    | Xanthine dehydrogenase/oxidase                      | XDH    |
| HQ | MOL000442 | 1,7-Dihydroxy-3,9-dimethoxy                                                                                                   | Prostaglandin G/H synthase 2                        | PTGS2  |
| HQ | MOL000442 | 1,7-Dihydroxy-3,9-dimethoxy                                                                                                   | Retinoic acid receptor RXR-alpha                    | RXRA   |
| HQ | MOL000442 | 1,7-Dihydroxy-3,9-dimethoxy                                                                                                   | Heat shock protein HSP 90                           | HSP90  |
| HQ | MOL000442 | 1,7-Dihydroxy-3,9-dimethoxy                                                                                                   | Trypsin-1                                           | TRY1   |
| HQ | MOL000296 | hederagenin                                                                                                                   | Progesterone receptor                               | PGR    |
| HQ | MOL000296 | hederagenin                                                                                                                   | Nuclear receptor coactivator 2                      | NCOA2  |
| HQ | MOL000296 | hederagenin                                                                                                                   | Muscarinic acetylcholine receptor M3                | CHRM3  |
| HQ | MOL000296 | hederagenin                                                                                                                   | Muscarinic acetylcholine receptor M1                | CHRM1  |
| HQ | MOL000296 | hederagenin                                                                                                                   | Gamma-aminobutyric-acid receptor alpha-2 subunit    | GABRA2 |
| HQ | MOL000296 | hederagenin                                                                                                                   | Gamma-aminobutyric-acid receptor alpha-3 subunit    | GABRA3 |
| HQ | MOL000296 | hederagenin                                                                                                                   | Muscarinic acetylcholine receptor M2                | CHRM2  |
| HQ | MOL000296 | hederagenin                                                                                                                   | Alpha-1B adrenergic receptor                        | ADRA1B |
| HQ | MOL000296 | hederagenin                                                                                                                   | Gamma-aminobutyric acid receptor subunit alpha-1    | GABRA1 |
| HQ | MOL000296 | hederagenin                                                                                                                   | Glutamate receptor 2                                | GRIA2  |
| HQ | MOL000296 | hederagenin                                                                                                                   | Gamma-aminobutyric-acid receptor subunit alpha-6    | GABRA6 |
| HQ | MOL000296 | hederagenin                                                                                                                   | Gamma-aminobutyric-acid receptor alpha-5 subunit    | GABRA5 |
| HQ | MOL000296 | hederagenin                                                                                                                   | Ig gamma-1 chain C region                           | IGHG1  |
| HQ | MOL000296 | hederagenin                                                                                                                   | Alcohol dehydrogenase 1B                            | ADH1B  |
| HQ | MOL000296 | hederagenin                                                                                                                   | Alcohol dehydrogenase 1C                            | ADH1C  |
| HQ | MOL000296 | hederagenin                                                                                                                   | Lysozyme                                            | LYZ    |
| HQ | MOL000296 | hederagenin                                                                                                                   | Prostaglandin G/H synthase 1                        | PTGS1  |
| HQ | MOL000296 | hederagenin                                                                                                                   | Sodium channel protein type 5 subunit alpha         | SCN5A  |
| HQ | MOL000296 | hederagenin                                                                                                                   | Prostaglandin G/H synthase 2                        | PTGS2  |
| HQ | MOL000296 | hederagenin                                                                                                                   | Retinoic acid receptor RXR-alpha                    | RXRA   |
| HQ | MOL000296 | hederagenin                                                                                                                   | CGMP-inhibited 3',5'-cyclic phosphodiesterase A     | PDE3A  |
| HQ | MOL000296 | hederagenin                                                                                                                   | Sodium-dependent noradrenaline transporter          | SLC6A2 |
| HQ | MOL000379 | 9,10-dimethoxypterocarpan-3-O-β-D-glucoside                                                                                   | Prostaglandin G/H synthase 2                        | PTGS2  |
| HQ | MOL000379 | 9,10-dimethoxypterocarpan-3-O-β-D-glucoside                                                                                   | DNA topoisomerase II                                | TOP2   |
| HQ | MOL000379 | 9,10-dimethoxypterocarpan-3-O-β-D-glucoside                                                                                   | Nuclear receptor coactivator 2                      | NCOA2  |
| HQ | MOL000033 | (3S,8S,9S,10R,13R,14S,17R)-10,13-dimethyl-17-[(2R,5S)-5-propan-2-yl]octan-2-yl]-2,3,4,7,8,9,11,12,14,15,16,17-dodecahydro-1H- | Progesterone receptor                               | PGR    |
| HQ | MOL000387 | Bifendate                                                                                                                     | Prostaglandin G/H synthase 2                        | PTGS2  |
| HQ | MOL000387 | Bifendate                                                                                                                     | Vascular endothelial growth factor receptor 2       | KDR    |
| HQ | MOL000387 | Bifendate                                                                                                                     | Hepatocyte growth factor receptor                   | MET    |
| HQ | MOL000387 | Bifendate                                                                                                                     | Heat shock protein HSP 90                           | HSP90  |
| HQ | MOL000387 | Bifendate                                                                                                                     | Calcium-activated potassium channel subunit alpha 1 | KCNMA1 |

|    |           |                                 |                                                                                 |        |
|----|-----------|---------------------------------|---------------------------------------------------------------------------------|--------|
| HQ | MOL000387 | Bifendate                       | Prostaglandin G/H synthase 1                                                    | PTGS1  |
| HQ | MOL000387 | Bifendate                       | DNA topoisomerase II                                                            | TOP2   |
| NX | MOL002897 | epiberberine                    | Nitric oxide synthase, inducible                                                | NOS2   |
| NX | MOL002897 | epiberberine                    | Potassium voltage-gated channel subfamily H member 2                            | KCNH2  |
| NX | MOL002897 | epiberberine                    | Estrogen receptor                                                               | ER     |
| NX | MOL002897 | epiberberine                    | Androgen receptor                                                               | AR     |
| NX | MOL002897 | epiberberine                    | Prostaglandin G/H synthase 2                                                    | PTGS2  |
| NX | MOL002897 | epiberberine                    | Nitric-oxide synthase, endothelial                                              | NOS3   |
| NX | MOL002897 | epiberberine                    | Retinoic acid receptor RXR-alpha                                                | RXRA   |
| NX | MOL002897 | epiberberine                    | mRNA of PKA Catalytic Subunit C-alpha                                           | PRKACA |
| NX | MOL002897 | epiberberine                    | Trypsin-1                                                                       | TRY1   |
| NX | MOL002897 | epiberberine                    | Nuclear receptor coactivator 2                                                  | NCOA2  |
| NX | MOL002897 | epiberberine                    | cAMP and cAMP-inhibited cGMP 3',5'-cyclic phosphodiesterase 10A                 | PDE10A |
| NX | MOL004355 | Spinasterol                     | Progesterone receptor                                                           | PGR    |
| NX | MOL004355 | Spinasterol                     | Mineralocorticoid receptor                                                      | NR3C2  |
| NX | MOL004355 | Spinasterol                     | Nuclear receptor coactivator 2                                                  | NCOA2  |
| NX | MOL001006 | poriferasta-7,22E-dien-3beta-ol | Progesterone receptor                                                           | PGR    |
| NX | MOL001006 | poriferasta-7,22E-dien-3beta-ol | Nuclear receptor coactivator 2                                                  | NCOA2  |
| NX | MOL001006 | poriferasta-7,22E-dien-3beta-ol | Mineralocorticoid receptor                                                      | NR3C2  |
| NX | MOL000422 | kaempferol                      | Nitric oxide synthase, inducible                                                | NOS2   |
| NX | MOL000422 | kaempferol                      | Prostaglandin G/H synthase 1                                                    | PTGS1  |
| NX | MOL000422 | kaempferol                      | Androgen receptor                                                               | AR     |
| NX | MOL000422 | kaempferol                      | Peroxisome proliferator-activated receptor gamma                                | PPARG  |
| NX | MOL000422 | kaempferol                      | Prostaglandin G/H synthase 2                                                    | PTGS2  |
| NX | MOL000422 | kaempferol                      | Heat shock protein HSP 90                                                       | HSP90  |
| NX | MOL000422 | kaempferol                      | Phosphatidylinositol-4,5-bisphosphate 3-kinase catalytic subunit, gamma isoform | PIK3CG |
| NX | MOL000422 | kaempferol                      | mRNA of PKA Catalytic Subunit C-alpha                                           | PRKACA |
| NX | MOL000422 | kaempferol                      | Nuclear receptor coactivator 2                                                  | NCOA2  |
| NX | MOL000422 | kaempferol                      | Dipeptidyl peptidase 4                                                          | DPP4   |
| NX | MOL000422 | kaempferol                      | Trypsin-1                                                                       | TRY1   |
| NX | MOL000422 | kaempferol                      | Progesterone receptor                                                           | PGR    |
| NX | MOL000422 | kaempferol                      | Muscarinic acetylcholine receptor M1                                            | CHRM1  |
| NX | MOL000422 | kaempferol                      | Nitric oxide synthase, endothelial                                              | NOS3   |
| NX | MOL000422 | kaempferol                      | Gamma-aminobutyric acid receptor subunit alpha-2                                | GABRA2 |
| NX | MOL000422 | kaempferol                      | Acetylcholinesterase                                                            | ACHE   |
| NX | MOL000422 | kaempferol                      | Sodium-dependent noradrenaline transporter                                      | SLC6A2 |
| NX | MOL000422 | kaempferol                      | Muscarinic acetylcholine receptor M2                                            | CHRM2  |
| NX | MOL000422 | kaempferol                      | Alpha-1B adrenergic receptor                                                    | ADRA1B |
| NX | MOL000422 | kaempferol                      | Gamma-aminobutyric acid receptor subunit alpha-1                                | GABRA1 |
| NX | MOL000422 | kaempferol                      | DNA topoisomerase II                                                            | TOP2   |
| NX | MOL000422 | kaempferol                      | Coagulation factor VII                                                          | F7     |
| NX | MOL000422 | kaempferol                      | Calmodulin                                                                      | CALM   |
| NX | MOL000422 | kaempferol                      | Transcription factor p65                                                        | RELA   |
| NX | MOL000422 | kaempferol                      | Inhibitor of nuclear factor kappa-B kinase subunit beta                         | IKBKB  |
| NX | MOL000422 | kaempferol                      | RAC-alpha serine/threonine-protein kinase                                       | AKT1   |
| NX | MOL000422 | kaempferol                      | Apoptosis regulator Bcl-2                                                       | BCL2   |
| NX | MOL000422 | kaempferol                      | Apoptosis regulator BAX                                                         | BAX    |
| NX | MOL000422 | kaempferol                      | Tumor necrosis factor                                                           | TNF    |
| NX | MOL000422 | kaempferol                      | Transcription factor AP-1                                                       | TFAP1  |

|    |           |                      |                                                                                 |        |
|----|-----------|----------------------|---------------------------------------------------------------------------------|--------|
| NX | MOL000422 | kaempferol           | Activator of 90 kDa heat shock protein ATPase homolog 1                         | AHSA1  |
| NX | MOL000422 | kaempferol           | Caspase-3                                                                       | CASP3  |
| NX | MOL000422 | kaempferol           | Mitogen-activated protein kinase 8                                              | MAPK8  |
| NX | MOL000422 | kaempferol           | Xanthine dehydrogenase/oxidase                                                  | XDH    |
| NX | MOL000422 | kaempferol           | Interstitial collagenase                                                        | MMP1   |
| NX | MOL000422 | kaempferol           | Signal transducer and activator of transcription 1-alpha/beta                   | STAT1  |
| NX | MOL000422 | kaempferol           | Cell division control protein 2 homolog                                         | CDK2   |
| NX | MOL000422 | kaempferol           | Heme oxygenase 1                                                                | HMOX1  |
| NX | MOL000422 | kaempferol           | Cytochrome P450 3A4                                                             | CYP3A4 |
| NX | MOL000422 | kaempferol           | Cytochrome P450 1A2                                                             | CYP1A2 |
| NX | MOL000422 | kaempferol           | Cytochrome P450 1A1                                                             | CYP1A1 |
| NX | MOL000422 | kaempferol           | Intercellular adhesion molecule 1                                               | ICAM1  |
| NX | MOL000422 | kaempferol           | E-selectin                                                                      | SELE   |
| NX | MOL000422 | kaempferol           | Vascular cell adhesion protein 1                                                | VCAM1  |
| NX | MOL000422 | kaempferol           | Nuclear receptor subfamily 1 group I member                                     | NR1I2  |
| NX | MOL000422 | kaempferol           | Cytochrome P450 1B1                                                             | CYP1B1 |
| NX | MOL000422 | kaempferol           | Arachidonate 5-lipoxygenase                                                     | ALOX5  |
| NX | MOL000422 | kaempferol           | Hyaluronan synthase 2                                                           | HAS2   |
| NX | MOL000422 | kaempferol           | Glutathione S-transferase P                                                     | GSTP1  |
| NX | MOL000422 | kaempferol           | Aryl hydrocarbon receptor                                                       | AHR    |
| NX | MOL000422 | kaempferol           | 26S proteasome non-ATPase regulatory subunit 3                                  | PSMD3  |
| NX | MOL000422 | kaempferol           | Solute carrier family 2, facilitated glucose transporter member 4               | SLC2A4 |
| NX | MOL000422 | kaempferol           | Nuclear receptor subfamily 1 group I member                                     | NR1I3  |
| NX | MOL000422 | kaempferol           | Insulin receptor                                                                | INSR   |
| NX | MOL000422 | kaempferol           | Type I iodothyronine deiodinase                                                 | DIO1   |
| NX | MOL000422 | kaempferol           | Serine/threonine-protein phosphatase 2B catalytic subunit alpha isoform         | PP3CB  |
| NX | MOL000422 | kaempferol           | Glutathione S-transferase Mu 1                                                  | GSTM1  |
| NX | MOL000422 | kaempferol           | Glutathione S-transferase Mu 2                                                  | GSTM2  |
| NX | MOL000422 | kaempferol           | Aldo-keto reductase family 1 member C3                                          | AKR1C3 |
| NX | MOL000422 | kaempferol           | Antileukoproteinase                                                             | SLPI   |
| NX | MOL002776 | Baicalin             | Coagulation factor X                                                            | F10    |
| NX | MOL002776 | Baicalin             | mRNA of Protein-tyrosine phosphatase, non-receptor type 1                       | PTPN1  |
| NX | MOL003847 | Inophyllum E         | Prostaglandin G/H synthase 1                                                    | PTGS1  |
| NX | MOL003847 | Inophyllum E         | Estrogen receptor                                                               | ER     |
| NX | MOL003847 | Inophyllum E         | Androgen receptor                                                               | AR     |
| NX | MOL003847 | Inophyllum E         | Coagulation factor Xa                                                           | F10    |
| NX | MOL003847 | Inophyllum E         | Prostaglandin G/H synthase 2                                                    | PTGS2  |
| NX | MOL003847 | Inophyllum E         | DNA topoisomerase II                                                            | TOP2   |
| NX | MOL003847 | Inophyllum E         | Estrogen receptor beta                                                          | ESR2   |
| NX | MOL003847 | Inophyllum E         | Glycogen synthase kinase-3 beta                                                 | GSK3B  |
| NX | MOL003847 | Inophyllum E         | Proto-oncogene serine/threonine-protein kinase Pim-1                            | PIM1   |
| NX | MOL002643 | delta 7-stigmastenol | Progesterone receptor                                                           | PGR    |
| NX | MOL000358 | beta-sitosterol      | Progesterone receptor                                                           | PGR    |
| NX | MOL000358 | beta-sitosterol      | Nuclear receptor coactivator 2                                                  | NCOA2  |
| NX | MOL000358 | beta-sitosterol      | Prostaglandin G/H synthase 1                                                    | PTGS1  |
| NX | MOL000358 | beta-sitosterol      | Prostaglandin G/H synthase 2                                                    | PTGS2  |
| NX | MOL000358 | beta-sitosterol      | Heat shock protein HSP 90                                                       | HSP90  |
| NX | MOL000358 | beta-sitosterol      | Phosphatidylinositol-4,5-bisphosphate 3-kinase catalytic subunit, gamma isoform | PIK3CG |
| NX | MOL000358 | beta-sitosterol      | Potassium voltage-gated channel subfamily H member 2                            | KCNH2  |
| NX | MOL000358 | beta-sitosterol      | mRNA of PKA Catalytic Subunit C-alpha                                           | PRKACA |
| NX | MOL000358 | beta-sitosterol      | Dopamine D1 receptor                                                            | DRD1   |

|    |           |                      |                                                                 |        |
|----|-----------|----------------------|-----------------------------------------------------------------|--------|
| NX | MOL000358 | beta-sitosterol      | Muscarinic acetylcholine receptor M3                            | CHRM3  |
| NX | MOL000358 | beta-sitosterol      | Muscarinic acetylcholine receptor M1                            | CHRM1  |
| NX | MOL000358 | beta-sitosterol      | Sodium channel protein type 5 subunit alpha                     | SCN5A  |
| NX | MOL000358 | beta-sitosterol      | Gamma-aminobutyric-acid receptor alpha-2 subunit                | GABRA2 |
| NX | MOL000358 | beta-sitosterol      | Muscarinic acetylcholine receptor M4                            | CHRM4  |
| NX | MOL000358 | beta-sitosterol      | CGMP-inhibited 3',5'-cyclic phosphodiesterase A                 | PDE3A  |
| NX | MOL000358 | beta-sitosterol      | 5-hydroxytryptamine 2A receptor                                 | HTR2A  |
| NX | MOL000358 | beta-sitosterol      | Gamma-aminobutyric-acid receptor alpha-5 subunit                | GABRA5 |
| NX | MOL000358 | beta-sitosterol      | Alpha-1A adrenergic receptor                                    | ADRA1A |
| NX | MOL000358 | beta-sitosterol      | Gamma-aminobutyric-acid receptor alpha-3 subunit                | GABRA3 |
| NX | MOL000358 | beta-sitosterol      | Muscarinic acetylcholine receptor M2                            | CHRM2  |
| NX | MOL000358 | beta-sitosterol      | Alpha-1B adrenergic receptor                                    | ADRA1B |
| NX | MOL000358 | beta-sitosterol      | Beta-2 adrenergic receptor                                      | ADRB2  |
| NX | MOL000358 | beta-sitosterol      | Neuronal acetylcholine receptor subunit                         | CHRNA2 |
| NX | MOL000358 | beta-sitosterol      | Sodium-dependent serotonin transporter                          | SLC6A4 |
| NX | MOL000358 | beta-sitosterol      | Mu-type opioid receptor                                         | OPRM1  |
| NX | MOL000358 | beta-sitosterol      | Gamma-aminobutyric acid receptor subunit alpha-1                | GABRA1 |
| NX | MOL000358 | beta-sitosterol      | Neuronal acetylcholine receptor protein, alpha-7 chain          | CHRNA7 |
| NX | MOL000358 | beta-sitosterol      | Apoptosis regulator Bcl-2                                       | BCL2   |
| NX | MOL000358 | beta-sitosterol      | Apoptosis regulator BAX                                         | BAX    |
| NX | MOL000358 | beta-sitosterol      | Caspase-9                                                       | CASP9  |
| NX | MOL000358 | beta-sitosterol      | Transcription factor AP-1                                       | TFAP1  |
| NX | MOL000358 | beta-sitosterol      | Caspase-3                                                       | CASP3  |
| NX | MOL000358 | beta-sitosterol      | Caspase-8                                                       | CASP8  |
| NX | MOL000358 | beta-sitosterol      | Protein kinase C alpha type                                     | PRKCA  |
| NX | MOL000358 | beta-sitosterol      | Transforming growth factor beta-1                               | TGFB1  |
| NX | MOL000358 | beta-sitosterol      | Serum paraoxonase/arylesterase 1                                | PON1   |
| NX | MOL000358 | beta-sitosterol      | Microtubule-associated protein 2                                | MAP2   |
| NX | MOL000085 | beta-daucosterol qt  | Progesterone receptor                                           | PGR    |
| NX | MOL001454 | berberine            | Nitric oxide synthase, inducible                                | NOS2   |
| NX | MOL001454 | berberine            | Prostaglandin G/H synthase 1                                    | PTGS1  |
| NX | MOL001454 | berberine            | Potassium voltage-gated channel subfamily H member 2            | KCNH2  |
| NX | MOL001454 | berberine            | Estrogen receptor                                               | ER     |
| NX | MOL001454 | berberine            | Androgen receptor                                               | AR     |
| NX | MOL001454 | berberine            | Sodium channel protein type 5 subunit alpha                     | SCN5A  |
| NX | MOL001454 | berberine            | Coagulation factor Xa                                           | F10    |
| NX | MOL001454 | berberine            | Prostaglandin G/H synthase 2                                    | PTGS2  |
| NX | MOL001454 | berberine            | Nitric-oxide synthase, endothelial                              | NOS3   |
| NX | MOL001454 | berberine            | Retinoic acid receptor RXR-alpha                                | RXRA   |
| NX | MOL001454 | berberine            | Beta-2 adrenergic receptor                                      | ADRB2  |
| NX | MOL001454 | berberine            | Heat shock protein HSP 90                                       | HSP90  |
| NX | MOL001454 | berberine            | mRNA of PKA Catalytic Subunit C-alpha                           | PRKACA |
| NX | MOL001454 | berberine            | Trypsin-1                                                       | TRY1   |
| NX | MOL001454 | berberine            | Nuclear receptor coactivator 2                                  | NCOA2  |
| NX | MOL001454 | berberine            | cAMP and cAMP-inhibited cGMP 3',5'-cyclic phosphodiesterase 10A | PDE10A |
| NX | MOL001454 | berberine            | Calmodulin                                                      | CALM   |
| NX | MOL012461 | 28-norolean-17-en-3- | Progesterone receptor                                           | PGR    |
| NX | MOL002714 | baicalein            | Prostaglandin G/H synthase 1                                    | PTGS1  |
| NX | MOL002714 | baicalein            | Androgen receptor                                               | AR     |
| NX | MOL002714 | baicalein            | Prostaglandin G/H synthase 2                                    | PTGS2  |
| NX | MOL002714 | baicalein            | Heat shock protein HSP 90                                       | HSP90  |



|    |           |           |                                                                                 |        |
|----|-----------|-----------|---------------------------------------------------------------------------------|--------|
| NX | MOL002714 | baicalein | mRNA of PKA Catalytic Subunit C-alpha                                           | PRKACA |
| NX | MOL002714 | baicalein | Dipeptidyl peptidase IV                                                         | DPP4   |
| NX | MOL002714 | baicalein | Phosphatidylinositol-4,5-bisphosphate 3-kinase catalytic subunit, gamma isoform | PIK3CG |
| NX | MOL002714 | baicalein | CGMP-inhibited 3',5'-cyclic phosphodiesterase A                                 | PDE3A  |
| NX | MOL002714 | baicalein | Trypsin-1                                                                       | TRY1   |
| NX | MOL002714 | baicalein | Nuclear receptor coactivator 2                                                  | NCOA2  |
| NX | MOL002714 | baicalein | Nuclear receptor coactivator 1                                                  | NCOA1  |
| NX | MOL002714 | baicalein | Calmodulin                                                                      | CALM   |
| NX | MOL002714 | baicalein | Transcription factor p65                                                        | RELA   |
| NX | MOL002714 | baicalein | RAC-alpha serine/threonine-protein kinase                                       | AKT1   |
| NX | MOL002714 | baicalein | Vascular endothelial growth factor A                                            | VEGFA  |
| NX | MOL002714 | baicalein | Apoptosis regulator Bcl-2                                                       | BCL2   |
| NX | MOL002714 | baicalein | Proto-oncogene c-Fos                                                            | FOS    |
| NX | MOL002714 | baicalein | Apoptosis regulator BAX                                                         | BAX    |
| NX | MOL002714 | baicalein | Matrix metalloproteinase-9                                                      | MMP9   |
| NX | MOL002714 | baicalein | Caspase-3                                                                       | CASP3  |
| NX | MOL002714 | baicalein | Cellular tumor antigen p53                                                      | TP53   |
| NX | MOL002714 | baicalein | Hypoxia-inducible factor 1-alpha                                                | HIF1A  |
| NX | MOL002714 | baicalein | Fos-related antigen 1                                                           | FOSL1  |
| NX | MOL002714 | baicalein | Fos-related antigen 2                                                           | FOSL2  |
| NX | MOL002714 | baicalein | Cell division control protein 2 homolog                                         | CDK2   |
| NX | MOL002714 | baicalein | G2/mitotic-specific cyclin-B1                                                   | CCNB1  |
| NX | MOL002714 | baicalein | Myeloperoxidase                                                                 | MPO    |
| NX | MOL002714 | baicalein | Aryl hydrocarbon receptor                                                       | AHR    |
| NX | MOL002714 | baicalein | Insulin-like growth factor II                                                   | IGF2   |
| NX | MOL002714 | baicalein | Cytochrome c                                                                    | CYCS   |
| NX | MOL002714 | baicalein | Arachidonate 12-lipoxygenase, 12S-type                                          | ALOX12 |
| NX | MOL002714 | baicalein | Nuclear factor of activated T-cells, cytoplasmic 1                              | NFATC1 |
| NX | MOL002714 | baicalein | Tudor domain-containing protein 7                                               | TDRD7  |
| NX | MOL002714 | baicalein | Egl nine homolog 1                                                              | EGLN1  |
| NX | MOL002714 | baicalein | NADPH oxidase 5                                                                 | NOX5   |
| NX | MOL002714 | baicalein | Fatty acid-binding protein, epidermal                                           | FABP5  |
| NX | MOL002714 | baicalein | Apolipoprotein D                                                                | APOD   |
| NX | MOL000173 | wogonin   | Nitric oxide synthase, inducible                                                | NOS2   |
| NX | MOL000173 | wogonin   | Prostaglandin G/H synthase 1                                                    | PTGS1  |
| NX | MOL000173 | wogonin   | Estrogen receptor                                                               | ER     |
| NX | MOL000173 | wogonin   | Androgen receptor                                                               | AR     |
| NX | MOL000173 | wogonin   | Sodium channel protein type 5 subunit alpha                                     | SCN5A  |
| NX | MOL000173 | wogonin   | Peroxisome proliferator activated receptor gamma                                | PPARG  |
| NX | MOL000173 | wogonin   | Prostaglandin G/H synthase 2                                                    | PTGS2  |
| NX | MOL000173 | wogonin   | Retinoic acid receptor RXR-alpha                                                | RXRA   |
| NX | MOL000173 | wogonin   | CGMP-inhibited 3',5'-cyclic phosphodiesterase A                                 | PDE3A  |
| NX | MOL000173 | wogonin   | Dipeptidyl peptidase 4                                                          | DPP4   |
| NX | MOL000173 | wogonin   | Mitogen-activated protein kinase 14                                             | MAPK14 |
| NX | MOL000173 | wogonin   | Glycogen synthase kinase-3 beta                                                 | GSK3B  |
| NX | MOL000173 | wogonin   | Heat shock protein HSP 90                                                       | HSP90  |
| NX | MOL000173 | wogonin   | Cell division protein kinase 2                                                  | CDK2   |
| NX | MOL000173 | wogonin   | Phosphatidylinositol-4,5-bisphosphate 3-kinase catalytic subunit, gamma isoform | PIK3CG |
| NX | MOL000173 | wogonin   | Serine/threonine-protein kinase Chk1                                            | CHEK1  |
| NX | MOL000173 | wogonin   | mRNA of PKA Catalytic Subunit C-alpha                                           | PRKACA |
| NX | MOL000173 | wogonin   | Trypsin-1                                                                       | TRY1   |
| NX | MOL000173 | wogonin   | Calmodulin                                                                      | CALM   |
| NX | MOL000173 | wogonin   | Beta-2 adrenergic receptor                                                      | ADRB2  |

|    |           |           |                                                             |        |
|----|-----------|-----------|-------------------------------------------------------------|--------|
| NX | MOL000173 | wogonin   | Gamma-aminobutyric acid receptor subunit alpha-1            | GABRA1 |
| NX | MOL000173 | wogonin   | Transcription factor p65                                    | RELA   |
| NX | MOL000173 | wogonin   | RAC-alpha serine/threonine-protein kinase                   | AKT1   |
| NX | MOL000173 | wogonin   | G1/S-specific cyclin-D1                                     | CCND1  |
| NX | MOL000173 | wogonin   | Apoptosis regulator Bcl-2                                   | BCL2   |
| NX | MOL000173 | wogonin   | Cyclin-dependent kinase inhibitor 1                         | CDKN1A |
| NX | MOL000173 | wogonin   | Eukaryotic translation initiation factor 6                  | EIF6   |
| NX | MOL000173 | wogonin   | Apoptosis regulator BAX                                     | BAX    |
| NX | MOL000173 | wogonin   | Caspase-9                                                   | CASP9  |
| NX | MOL000173 | wogonin   | Vascular endothelial growth factor receptor 2               | KDR    |
| NX | MOL000173 | wogonin   | Tumor necrosis factor                                       | TNF    |
| NX | MOL000173 | wogonin   | Transcription factor AP-1                                   | TFAP1  |
| NX | MOL000173 | wogonin   | Interleukin-6                                               | IL6    |
| NX | MOL000173 | wogonin   | Activator of 90 kDa heat shock protein ATPase homolog 1     | AHSA1  |
| NX | MOL000173 | wogonin   | Caspase-3                                                   | CASP3  |
| NX | MOL000173 | wogonin   | Cellular tumor antigen p53                                  | TP53   |
| NX | MOL000173 | wogonin   | Bcl-2-binding component 3                                   | BBC3   |
| NX | MOL000173 | wogonin   | Telomerase protein component 1                              | TEP1   |
| NX | MOL000173 | wogonin   | Interstitial collagenase                                    | MMP1   |
| NX | MOL000173 | wogonin   | C-C motif chemokine 2                                       | CCL2   |
| NX | MOL000173 | wogonin   | Protein kinase C delta type                                 | PRKCD  |
| NX | MOL000173 | wogonin   | Prostaglandin E2 receptor EP3 subtype                       | PTGER3 |
| NX | MOL000173 | wogonin   | Fibronectin                                                 | FN1    |
| NX | MOL000173 | wogonin   | Interleukin-8                                               | CXCL8  |
| NX | MOL000173 | wogonin   | Induced myeloid leukemia cell differentiation protein Mcl-1 | MCL1   |
| NX | MOL001458 | coptisine | Nitric oxide synthase, inducible                            | NOS2   |
| NX | MOL001458 | coptisine | Prostaglandin G/H synthase 1                                | PTGS1  |
| NX | MOL001458 | coptisine | Potassium voltage-gated channel subfamily H member 2        | KCNH2  |
| NX | MOL001458 | coptisine | Estrogen receptor                                           | ER     |
| NX | MOL001458 | coptisine | Androgen receptor                                           | AR     |
| NX | MOL001458 | coptisine | Sodium channel protein type 5 subunit alpha                 | SCN5A  |
| NX | MOL001458 | coptisine | Prostaglandin G/H synthase 2                                | PTGS2  |
| NX | MOL001458 | coptisine | Nitric-oxide synthase, endothelial                          | NOS3   |
| NX | MOL001458 | coptisine | Trypsin-1                                                   | TRY1   |

Table S4. 446 active ingredients and 56 targets were selected

| BATMAN-tcm |                                        |                   |
|------------|----------------------------------------|-------------------|
| Herb       | Compound                               | Predicted targets |
| NX         | Ecdysterone-3-O-Beta-D-Glucopyranoside | NR3C1             |
| NX         | Rubrosterone                           | PGR               |
| NX         | Rubrosterone                           | AR                |
| NX         | Rubrosterone                           | NR3C1             |
| NX         | Rubrosterone                           | NR3C2             |
| NX         | Dibutyl Phthalate                      | SCN5A             |
| NX         | Dibutyl Phthalate                      | ACHE              |
| NX         | Chrysophanol                           | CA2               |
| NX         | Spinoside A                            | NR3C1             |
| NX         | Ecdysterone                            | AR                |
| NX         | Ecdysterone                            | PGR               |
| NX         | Ecdysterone                            | NR3C1             |
| NX         | Ecdysterone                            | NR3C2             |
| NX         | Inokosterone                           | AR                |
| NX         | Inokosterone                           | PGR               |
| NX         | Inokosterone                           | NR3C1             |
| NX         | Inokosterone                           | NR3C2             |
| NX         | Inokosterone                           | PRKCA             |
| DS         | Tanshiquinone B                        | AKR1C3            |
| DS         | Tanshiquinone B                        | ACHE              |
| DS         | Isocucurbitacin D                      | AR                |
| DS         | Miltionone I                           | AKR1C3            |
| DS         | Miltionone I                           | ACHE              |
| DS         | Neotanshinone C                        | AKR1C3            |
| DS         | Neotanshinone C                        | ACHE              |
| DS         | Salvinone                              | ALOX5             |
| DS         | Cryptoxanthin                          | AKR1C3            |
| DS         | Ferruginol                             | ACHE              |
| DS         | Ferruginol                             | ALOX5             |
| DS         | Danshensu                              | ALOX5             |
| DS         | Caffeicacid                            | AR                |
| DS         | Neocryptotanshinone Ii                 | AKR1C3            |
| DS         | Neocryptotanshinone Ii                 | ACHE              |
| DS         | Isotenulin                             | AR                |
| DS         | Daphneolone                            | ALOX5             |
| DS         | Gamma-Sitosterol                       | AR                |
| DS         | Gamma-Sitosterol                       | AKR1C3            |
| DS         | Dauricine                              | ACHE              |
| DS         | Ursolicacid                            | AR                |
| DS         | Ursolicacid                            | ADH1C             |
| DS         | Dihydrokaranone                        | AR                |
| DS         | Salviol                                | ALOX5             |
| DS         | Tanshiquinone B                        | CYP1A2            |
| DS         | Tanshiquinone B                        | BCL2L1            |
| DS         | Miltirone                              | F10               |
| DS         | Miltirone                              | F2                |
| DS         | Miltirone                              | BCL2              |
| DS         | Miltirone                              | F7                |

|    |                        |        |
|----|------------------------|--------|
| DS | Miltirone              | CA2    |
| DS | Miltionone I           | CYP1A2 |
| DS | Miltionone I           | BCL2L1 |
| DS | Neotanshinone C        | CYP1A2 |
| DS | Neotanshinone C        | BCL2L1 |
| DS | Salvinone              | ESR2   |
| DS | Cryptoxanthin          | CYP3A4 |
| DS | Danshenxinkun A        | CHRM3  |
| DS | Dehydromiltirone       | F10    |
| DS | Dehydromiltirone       | F2     |
| DS | Dehydromiltirone       | BCL2   |
| DS | Dehydromiltirone       | F7     |
| DS | Dehydromiltirone       | CA2    |
| DS | Ferruginol             | ESR2   |
| DS | Neocryptotanshinone    | CHRM3  |
| DS | Neocryptotanshinone Ii | CYP1A2 |
| DS | Neocryptotanshinone Ii | BCL2L1 |
| DS | Heteratisine           | CHRM3  |
| DS | Heteratisine           | CYP3A4 |
| DS | Gamma-Sitosterol       | CYP3A4 |
| DS | Dauricine              | CHRM3  |
| DS | Tanshinone Iib         | CHRM3  |
| DS | Dihydrokaranone        | BCL2   |
| DS | Dihydrokaranone        | ESR2   |
| DS | Salviol                | ESR2   |
| DS | Tanshiquinone B        | GABRA5 |
| DS | Tanshiquinone B        | GABRG3 |
| DS | Tanshiquinone B        | GABRA6 |
| DS | Tanshiquinone B        | NCOA1  |
| DS | Tanshiquinone B        | GABRA2 |
| DS | Tanshiquinone B        | GABRA1 |
| DS | Tanshiquinone B        | IL1B   |
| DS | Tanshiquinone B        | GABRE  |
| DS | Tanshiquinone B        | IL6    |
| DS | Tanshiquinone B        | GABRA3 |
| DS | Miltirone              | GABRA2 |
| DS | Miltirone              | GABRA3 |
| DS | Miltirone              | GABRA1 |
| DS | Miltirone              | NQO1   |
| DS | Miltionone I           | GABRA5 |
| DS | Miltionone I           | GABRG3 |
| DS | Miltionone I           | GABRA6 |
| DS | Miltionone I           | NCOA1  |
| DS | Miltionone I           | GABRA2 |
| DS | Miltionone I           | GABRA1 |
| DS | Miltionone I           | IL1B   |
| DS | Miltionone I           | GABRE  |
| DS | Miltionone I           | IL6    |
| DS | Miltionone I           | GABRA3 |
| DS | Neotanshinone C        | GABRA5 |
| DS | Neotanshinone C        | GABRG3 |
| DS | Neotanshinone C        | GABRA6 |

|    |                        |        |
|----|------------------------|--------|
| DS | Neotanshinone C        | NCOA1  |
| DS | Neotanshinone C        | GABRA2 |
| DS | Neotanshinone C        | GABRA1 |
| DS | Neotanshinone C        | IL1B   |
| DS | Neotanshinone C        | GABRE  |
| DS | Neotanshinone C        | IL6    |
| DS | Neotanshinone C        | GABRA3 |
| DS | Salvinone              | NR1I2  |
| DS | Dehydromiltirone       | GABRA2 |
| DS | Dehydromiltirone       | GABRA3 |
| DS | Dehydromiltirone       | GABRA1 |
| DS | Dehydromiltirone       | NQO1   |
| DS | Ferruginol             | GABRA5 |
| DS | Ferruginol             | IL1B   |
| DS | Ferruginol             | GABRA3 |
| DS | Ferruginol             | GABRA6 |
| DS | Ferruginol             | NR1I2  |
| DS | Ferruginol             | GABRG3 |
| DS | Ferruginol             | GABRA1 |
| DS | Ferruginol             | GABRA2 |
| DS | Ferruginol             | NCOA1  |
| DS | Ferruginol             | GABRE  |
| DS | Ferruginol             | IL6    |
| DS | Neocryptotanshinone Ii | GABRA5 |
| DS | Neocryptotanshinone Ii | GABRG3 |
| DS | Neocryptotanshinone Ii | GABRA6 |
| DS | Neocryptotanshinone Ii | NCOA1  |
| DS | Neocryptotanshinone Ii | GABRA2 |
| DS | Neocryptotanshinone Ii | GABRA1 |
| DS | Neocryptotanshinone Ii | IL1B   |
| DS | Neocryptotanshinone Ii | GABRE  |
| DS | Neocryptotanshinone Ii | IL6    |
| DS | Neocryptotanshinone Ii | GABRA3 |
| DS | Salviol                | NR1I2  |
| DS | Tanshiquinone B        | PGR    |
| DS | Tanshiquinone B        | SCN5A  |
| DS | Tanshiquinone B        | PTGS2  |
| DS | Tanshiquinone B        | RXRA   |
| DS | Tanshiquinone B        | TNF    |
| DS | Miltirone              | PTGS2  |
| DS | Isocucurbitacin D      | NR3C1  |
| DS | Isocucurbitacin D      | PGR    |
| DS | Salonitenolide         | PRKCA  |
| DS | Miltionone I           | PGR    |
| DS | Miltionone I           | SCN5A  |
| DS | Miltionone I           | PTGS2  |
| DS | Miltionone I           | RXRA   |
| DS | Miltionone I           | TNF    |
| DS | Neotanshinone C        | PGR    |
| DS | Neotanshinone C        | SCN5A  |
| DS | Neotanshinone C        | PTGS2  |
| DS | Neotanshinone C        | RXRA   |

|    |                                                           |        |
|----|-----------------------------------------------------------|--------|
| DS | Neotanshinone C                                           | TNF    |
| DS | Salvinone                                                 | PGR    |
| DS | Cryptoxanthin                                             | RXR B  |
| DS | Cryptoxanthin                                             | PGR    |
| DS | Cryptoxanthin                                             | RXRA   |
| DS | Dehydromiltirone                                          | PTGS2  |
| DS | Ferruginol                                                | RXRA   |
| DS | Ferruginol                                                | TNF    |
| DS | Neocryptotanshinone Ii                                    | PGR    |
| DS | Neocryptotanshinone Ii                                    | SCN5A  |
| DS | Neocryptotanshinone Ii                                    | PTGS2  |
| DS | Neocryptotanshinone Ii                                    | RXRA   |
| DS | Neocryptotanshinone Ii                                    | TNF    |
| DS | Isotenulin                                                | PGR    |
| DS | Isotenulin                                                | NR3C1  |
| DS | Isotenulin                                                | NR1I3  |
| DS | Isotenulin                                                | NR3C2  |
| DS | Tanshinone Vi                                             | SCN5A  |
| DS | Gamma-Sitosterol                                          | PGR    |
| DS | Gamma-Sitosterol                                          | RXRA   |
| DS | Gamma-Sitosterol                                          | NR3C1  |
| DS | Samaderin A                                               | NR3C2  |
| DS | 1-Hydroxytaxinine A                                       | PRKCA  |
| DS | 1-Hydroxytaxinine A                                       | NR3C2  |
| DS | 1-Hydroxytaxinine A                                       | NR3C1  |
| DS | Ursolicacid                                               | NR3C1  |
| DS | Ursolicacid                                               | NR3C2  |
| DS | Ursolicacid                                               | PTGS2  |
| DS | Ursolicacid                                               | PGR    |
| DS | Dihydrokaranone                                           | NR3C1  |
| DS | Dihydrokaranone                                           | PIK3CG |
| DS | Dihydrokaranone                                           | PGR    |
| DS | Dihydrokaranone                                           | TNF    |
| DS | Dihydrokaranone                                           | NR3C2  |
| DS | Salviol                                                   | PGR    |
| DH | Sennidin A                                                | IL1B   |
| DH | Sennidin A                                                | ALOX5  |
| DH | Aloe-Emodin                                               | CHRM3  |
| DH | 3-Hydroxy-25-Norfriedel-3,1(10)-Dien-2-One-54-Oic<br>Acid | AR     |
| DH | Palmidin B                                                | CHRM3  |
| DH | Rhein                                                     | IL1B   |
| DH | Rhein                                                     | ALOX5  |
| DH | (E)-4-Phenyl-3-Buten-2-One                                | GABRA2 |
| DH | (E)-4-Phenyl-3-Buten-2-One                                | F10    |
| DH | (E)-4-Phenyl-3-Buten-2-One                                | GABRA3 |
| DH | (E)-4-Phenyl-3-Buten-2-One                                | F2     |
| DH | (E)-4-Phenyl-3-Buten-2-One                                | BCL2   |
| DH | (E)-4-Phenyl-3-Buten-2-One                                | F7     |
| DH | (E)-4-Phenyl-3-Buten-2-One                                | GABRA1 |
| DH | (E)-4-Phenyl-3-Buten-2-One                                | CA2    |
| DH | Aloemodin                                                 | CHRM3  |

|    |                                                        |        |
|----|--------------------------------------------------------|--------|
| DH | Rheidin A                                              | IL1B   |
| DH | Rheidin A                                              | ALOX5  |
| DH | 3,4,5-Trihydroxybenzoic Acid                           | MPO    |
| DH | 3,4,5-Trihydroxybenzoic Acid                           | ALOX5  |
| DH | Gallicacid                                             | MPO    |
| DH | Gallicacid                                             | ALOX5  |
| DH | Gallocatechin                                          | ALOX5  |
| DH | Rheidin B                                              | IL1B   |
| DH | Rheidin B                                              | ALOX5  |
| DH | Epicatechin                                            | ALOX5  |
| DH | Toralactone                                            | ALOX5  |
| DH | Palmidin C                                             | ESR2   |
| DH | Progesterone                                           | AR     |
| DH | Progesterone                                           | ESR2   |
| DH | Progesterone                                           | NCOA2  |
| DH | Progesterone                                           | AHR    |
| DH | Progesterone                                           | AKT1   |
| DH | Progesterone                                           | NCOA1  |
| DH | Progesterone                                           | BCL2   |
| DH | Rhapontisterone                                        | AR     |
| DH | Serotonine                                             | GSTP1  |
| DH | Serotonine                                             | GABRG3 |
| DH | Serotonine                                             | GABRA1 |
| DH | Serotonine                                             | CHRM3  |
| DH | Serotonine                                             | GABRA2 |
| DH | Serotonine                                             | GABRA5 |
| DH | Serotonine                                             | GABRA6 |
| DH | Serotonine                                             | MPO    |
| DH | Serotonine                                             | GABRE  |
| DH | Serotonine                                             | GABRA3 |
| DH | Emodin                                                 | ESR2   |
| DH | Chrysophanol                                           | CA2    |
| DH | Palmidin A                                             | CHRM3  |
| DH | Emodin Anthrone                                        | ESR2   |
| DH | 2-Methyl Cardol                                        | ESR2   |
| DH | Sennidin A                                             | PPARG  |
| DH | Sennidin A                                             | PTGS1  |
| DH | Sennidin A                                             | PTGS2  |
| DH | 3-Hydroxy-25-Norfriedel-3,1(10)-Dien-2-One-31-Oic Acid | NR3C1  |
| DH | 3-Hydroxy-25-Norfriedel-3,1(10)-Dien-2-One-48-Oic Acid | NOS2   |
| DH | 3-Hydroxy-25-Norfriedel-3,1(10)-Dien-2-One-49-Oic Acid | PTGS1  |
| DH | 3-Hydroxy-25-Norfriedel-3,1(10)-Dien-2-One-55-Oic Acid | PTGS2  |
| DH | Rheinoside A                                           | TOP2A  |
| DH | Rhein                                                  | PPARG  |
| DH | Rhein                                                  | PTGS1  |
| DH | Rhein                                                  | PTGS2  |
| DH | Rhapontigenin                                          | TYR    |
| DH | (E)-4-Phenyl-3-Buten-2-One                             | PTGS2  |

|    |                              |        |
|----|------------------------------|--------|
| DH | (E)-4-Phenyl-3-Buten-2-One   | PTGS1  |
| DH | (E)-4-Phenyl-3-Buten-2-One   | NQO1   |
| DH | Rheidin A                    | PPARG  |
| DH | Rheidin A                    | PTGS1  |
| DH | Rheidin A                    | PTGS2  |
| DH | 3,4,5-Trihydroxybenzoic Acid | PPARG  |
| DH | 3,4,5-Trihydroxybenzoic Acid | PTGS1  |
| DH | 3,4,5-Trihydroxybenzoic Acid | PTGS2  |
| DH | Gallicacid                   | PTGS1  |
| DH | Gallicacid                   | PPARG  |
| DH | Gallicacid                   | PRKCA  |
| DH | Gallicacid                   | PTGS2  |
| DH | Gallicacid                   | NR1I2  |
| DH | Gallicacid                   | PRKCB  |
| DH | Galocatechin                 | PRKCA  |
| DH | Galocatechin                 | NR1I2  |
| DH | Galocatechin                 | PRKCB  |
| DH | Rheidin B                    | PPARG  |
| DH | Rheidin B                    | PTGS1  |
| DH | Rheidin B                    | PTGS2  |
| DH | Epicatechin                  | PRKCA  |
| DH | Epicatechin                  | NR1I2  |
| DH | Epicatechin                  | PRKCB  |
| DH | Toralactone                  | PRKCA  |
| DH | Toralactone                  | NR1I2  |
| DH | Toralactone                  | PRKCB  |
| DH | Palmidin C                   | PGR    |
| DH | Progesterone                 | TNF    |
| DH | Progesterone                 | NR3C1  |
| DH | Progesterone                 | NOS2   |
| DH | Progesterone                 | PGR    |
| DH | Progesterone                 | RXRA   |
| DH | Progesterone                 | PIK3CG |
| DH | Progesterone                 | NR3C2  |
| DH | Rhapontisterone              | PGR    |
| DH | Rhapontisterone              | NR3C1  |
| DH | Rhapontisterone              | NR3C2  |
| DH | Serotonine                   | PTGS2  |
| DH | Serotonine                   | PPARG  |
| DH | Serotonine                   | PTGS1  |
| DH | Serotonine                   | NR3C1  |
| DH | Serotonine                   | SCN5A  |
| DH | Serotonine                   | PPARA  |
| DH | Emodin                       | PGR    |
| DH | Emodin Anthrone              | PGR    |
| DH | 2-Methyl Cardol              | PGR    |
| DH | Progesterone                 | PRKACA |
| HH | Carvacrol                    | ALOX5  |
| HH | Carvacrol                    | ACHE   |
| HH | Stearin                      | AR     |
| HH | 1-Hexadecene                 | ADH1C  |
| HH | Alpha-Onocerin               | AKR1C3 |



|    |                        |        |
|----|------------------------|--------|
| HH | Alpha-Onocerin         | CYP3A4 |
| HH | 1-Heptadecene          | ADH1C  |
| HH | Linoleyl Acetate       | AR     |
| HH | Safranal               | ACHE   |
| HH | Neocembrene            | ADH1C  |
| HH | Clerosterol            | CYP3A4 |
| HH | Clerosterol            | AR     |
| HH | Clerosterol            | AKR1C3 |
| HH | Gamma-Sitosterol       | CYP3A4 |
| HH | Gamma-Sitosterol       | AR     |
| HH | Gamma-Sitosterol       | AKR1C3 |
| HH | Phenylacetaldehyde     | BCL2   |
| HH | Arachidic Acid         | AKR1C3 |
| HH | Arachidic Acid         | CYP1A2 |
| HH | Arachidic Acid         | AR     |
| HH | Arachidic Acid         | ADH1C  |
| HH | Carvacrol              | GABRA2 |
| HH | Carvacrol              | GABRE  |
| HH | Carvacrol              | IL1B   |
| HH | Carvacrol              | GABRA5 |
| HH | Carvacrol              | GABRA3 |
| HH | Carvacrol              | GABRA6 |
| HH | Carvacrol              | NCOA1  |
| HH | Carvacrol              | GABRG3 |
| HH | Carvacrol              | GABRA1 |
| HH | Carvacrol              | IL6    |
| HH | 1-Hexadecene           | IL1B   |
| HH | 1-Heptadecene          | IL1B   |
| HH | Linoleyl Acetate       | NR3C2  |
| HH | Sagittariol            | NR3C1  |
| HH | Neocembrene            | IL1B   |
| HH | Clerosterol            | NR3C1  |
| HH | Kaempferol             | NQO1   |
| HH | Gamma-Sitosterol       | NR3C1  |
| HH | Carvacrol              | TNF    |
| HH | Carvacrol              | RXRA   |
| HH | 20-Hexadecanoylingenol | PRKCA  |
| HH | 20-Hexadecanoylingenol | PRKCB  |
| HH | 1-Hexadecene           | SCN5A  |
| HH | 1-Hexadecene           | PPARD  |
| HH | Alpha-Onocerin         | PGR    |
| HH | Alpha-Onocerin         | RXRA   |
| HH | 1-Heptadecene          | SCN5A  |
| HH | 1-Heptadecene          | PPARD  |
| HH | Linoleyl Acetate       | PTGS1  |
| HH | Linoleyl Acetate       | PGR    |
| HH | Linoleyl Acetate       | PTGS2  |
| HH | Safranal               | PGR    |
| HH | Sagittariol            | PGR    |
| HH | Neocembrene            | SCN5A  |
| HH | Neocembrene            | PPARD  |
| HH | Clerosterol            | PGR    |

|    |                                             |        |
|----|---------------------------------------------|--------|
| HH | Clerosterol                                 | RXRA   |
| HH | Gamma-Sitosterol                            | PGR    |
| HH | Gamma-Sitosterol                            | RXRA   |
| HH | Phenylacetaldehyde                          | PTGS1  |
| HH | Phenylacetaldehyde                          | PPARG  |
| HH | Phenylacetaldehyde                          | PTGS2  |
| HH | Arachidic Acid                              | TYR    |
| HH | Arachidic Acid                              | SCN5A  |
| HH | Lauric Aldehyde                             | SCN5A  |
| HH | Lauric Aldehyde                             | TYR    |
| SQ | etradecane                                  | ADH1C  |
| SQ | etradecane                                  | IL1B   |
| SQ | Tridecene                                   | ADH1C  |
| SQ | Tridecene                                   | IL1B   |
| SQ | 1,22-Docosanediol                           | GABRG3 |
| SQ | 1,22-Docosanediol                           | GABRA3 |
| SQ | 1,22-Docosanediol                           | GABRA6 |
| SQ | 1,22-Docosanediol                           | GABRA2 |
| SQ | 1,22-Docosanediol                           | GABRA5 |
| SQ | 1,22-Docosanediol                           | GABRA1 |
| SQ | 1,22-Docosanediol                           | IL6    |
| SQ | 1,22-Docosanediol                           | GABRE  |
| SQ | (-)-2d,4d,6d,8d-Tetramethyl Undecanoic Acid | AKR1C3 |
| SQ | (-)-2d,4d,6d,8d-Tetramethyl Undecanoic Acid | CYP1A2 |
| SQ | (-)-2d,4d,6d,8d-Tetramethyl Undecanoic Acid | AR     |
| SQ | (-)-2d,4d,6d,8d-Tetramethyl Undecanoic Acid | ADH1C  |
| SQ | Sandaracopimarinol                          | AR     |
| SQ | Dicapryl Phthalate                          | BCL2   |
| SQ | Dicapryl Phthalate                          | BCL2L1 |
| SQ | Dicapryl Phthalate                          | CA2    |
| SQ | Dicapryl Phthalate                          | IL1B   |
| SQ | Dicapryl Phthalate                          | IL6    |
| SQ | Delta-Elemene                               | ADH1C  |
| SQ | Delta-Elemene                               | IL1B   |
| SQ | Cyperene                                    | ADH1C  |
| SQ | Cyperene                                    | IL1B   |
| SQ | (-)-Trifara-9,14-Diene                      | ADH1C  |
| SQ | (-)-Trifara-9,14-Diene                      | IL1B   |
| SQ | Cycloeucalenol                              | AKR1C3 |
| SQ | Cycloeucalenol                              | CYP3A4 |
| SQ | 4,4'-Diketo-3-Hydroxy-Beta-Carotene         | AR     |
| SQ | Nonadecanoic Acid                           | AKR1C3 |
| SQ | Nonadecanoic Acid                           | CYP1A2 |
| SQ | Nonadecanoic Acid                           | AR     |
| SQ | Nonadecanoic Acid                           | ADH1C  |
| SQ | Ditertbutyl Phthalate                       | ACHE   |
| SQ | Hexadecanoic Acid                           | AKR1C3 |
| SQ | Hexadecanoic Acid                           | CYP1A2 |
| SQ | Hexadecanoic Acid                           | AR     |
| SQ | Hexadecanoic Acid                           | ADH1C  |
| SQ | Dauricine                                   | ACHE   |
| SQ | Dauricine                                   | CHRM3  |

|    |                                                                 |        |
|----|-----------------------------------------------------------------|--------|
| SQ | 3,4-Dimethylbenzoic Acid                                        | BCL2   |
| SQ | 3,4-Dimethylbenzoic Acid                                        | IL6    |
| SQ | 3,4-Dimethylbenzoic Acid                                        | BCL2L1 |
| SQ | 3,4-Dimethylbenzoic Acid                                        | CA2    |
| SQ | 3,4-Dimethylbenzoic Acid                                        | IL1B   |
| SQ | Epsilon-Cadinene                                                | ADH1C  |
| SQ | Epsilon-Cadinene                                                | IL1B   |
| SQ | 1-Tetradecanol                                                  | GABRG3 |
| SQ | 1-Tetradecanol                                                  | GABRA3 |
| SQ | 1-Tetradecanol                                                  | GABRA6 |
| SQ | 1-Tetradecanol                                                  | GABRA2 |
| SQ | 1-Tetradecanol                                                  | GABRA5 |
| SQ | 1-Tetradecanol                                                  | GABRA1 |
| SQ | 1-Tetradecanol                                                  | IL6    |
| SQ | 1-Tetradecanol                                                  | GABRE  |
| SQ | Cyperol                                                         | AR     |
| SQ | Cyperol                                                         | AKR1C3 |
| SQ | Cyperol                                                         | CYP3A4 |
| SQ | 1-Heptadecanol                                                  | GABRG3 |
| SQ | 1-Heptadecanol                                                  | GABRA3 |
| SQ | 1-Heptadecanol                                                  | GABRA6 |
| SQ | 1-Heptadecanol                                                  | GABRA2 |
| SQ | 1-Heptadecanol                                                  | GABRA5 |
| SQ | 1-Heptadecanol                                                  | GABRA1 |
| SQ | 1-Heptadecanol                                                  | IL6    |
| SQ | 1-Heptadecanol                                                  | GABRE  |
| SQ | N-Nonanol                                                       | GABRG3 |
| SQ | N-Nonanol                                                       | GABRA3 |
| SQ | N-Nonanol                                                       | GABRA6 |
| SQ | N-Nonanol                                                       | GABRA2 |
| SQ | N-Nonanol                                                       | GABRA5 |
| SQ | N-Nonanol                                                       | GABRA1 |
| SQ | N-Nonanol                                                       | IL6    |
| SQ | N-Nonanol                                                       | GABRE  |
| SQ | Elemicin                                                        | IL1B   |
| SQ | Alpha-Cuparenol                                                 | ESR2   |
| SQ | Stigmasterol                                                    | IL1B   |
| SQ | Stigmasterol                                                    | ADH1C  |
| SQ | Panaxatriol                                                     | AR     |
| SQ | Panaxadiol                                                      | AR     |
| SQ | Heneicosanic Acid                                               | AKR1C3 |
| SQ | Heneicosanic Acid                                               | CYP1A2 |
| SQ | Heneicosanic Acid                                               | AR     |
| SQ | Heneicosanic Acid                                               | ADH1C  |
| SQ | Coprine                                                         | GSTP1  |
| SQ | Coprine                                                         | LYZ    |
| SQ | Coprine                                                         | IL1B   |
| SQ | 1,1,5,5-Tetramethyl-4-Methano-2,3,4,6,7,10-Hexahydronaphthalene | ADH1C  |
| SQ | 1,1,5,5-Tetramethyl-4-Methano-2,3,4,6,7,10-Hexahydronaphthalene | IL1B   |
| SQ | Delta-Guaiene                                                   | ADH1C  |

|    |                                             |        |
|----|---------------------------------------------|--------|
| SQ | Delta-Guaiene                               | IL1B   |
| SQ | 1-Methyl-4-Isoallyl-Cyclohexane             | ADH1C  |
| SQ | 1-Methyl-4-Isoallyl-Cyclohexane             | IL1B   |
| SQ | Gamma-Sitosterol                            | CYP3A4 |
| SQ | Gamma-Sitosterol                            | AR     |
| SQ | Gamma-Sitosterol                            | AKR1C3 |
| SQ | Pentadecanoic Acid                          | AKR1C3 |
| SQ | Pentadecanoic Acid                          | CYP1A2 |
| SQ | Pentadecanoic Acid                          | AR     |
| SQ | Pentadecanoic Acid                          | ADH1C  |
| SQ | Cuparene                                    | ALOX5  |
| SQ | Cuparene                                    | F2     |
| SQ | etradecane                                  | SCN5A  |
| SQ | etradecane                                  | PPARD  |
| SQ | Tridecene                                   | SCN5A  |
| SQ | Tridecene                                   | PPARD  |
| SQ | 1,22-Docosanediol                           | TYR    |
| SQ | 1,22-Docosanediol                           | NCOA1  |
| SQ | 1,22-Docosanediol                           | SCN5A  |
| SQ | Ginsenoside                                 | RXRA   |
| SQ | Ginsenoside                                 | PGR    |
| SQ | (-)-2d,4d,6d,8d-Tetramethyl Undecanoic Acid | TYR    |
| SQ | (-)-2d,4d,6d,8d-Tetramethyl Undecanoic Acid | SCN5A  |
| SQ | Sandaracopimarinol                          | PGR    |
| SQ | Sandaracopimarinol                          | PTGS1  |
| SQ | Sandaracopimarinol                          | PTGS2  |
| SQ | Sandaracopimarinol                          | NR3C1  |
| SQ | Dicapryl Phthalate                          | PTGS2  |
| SQ | Dicapryl Phthalate                          | PPARA  |
| SQ | Dicapryl Phthalate                          | PPARG  |
| SQ | Dicapryl Phthalate                          | PTGS1  |
| SQ | Delta-Elemene                               | SCN5A  |
| SQ | Delta-Elemene                               | PPARD  |
| SQ | Delta-Elemene                               | PGR    |
| SQ | Cyperene                                    | SCN5A  |
| SQ | Cyperene                                    | PPARD  |
| SQ | (-)-Trifara-9,14-Diene                      | SCN5A  |
| SQ | (-)-Trifara-9,14-Diene                      | PPARD  |
| SQ | Cycloeucalenol                              | PGR    |
| SQ | Cycloeucalenol                              | RXRA   |
| SQ | 4,4'-Diketo-3-Hydroxy-Beta-Carotene         | RXRA   |
| SQ | 4,4'-Diketo-3-Hydroxy-Beta-Carotene         | NR3C1  |
| SQ | 4,4'-Diketo-3-Hydroxy-Beta-Carotene         | PGR    |
| SQ | 4,4'-Diketo-3-Hydroxy-Beta-Carotene         | RXRB   |
| SQ | 4,4'-Diketo-3-Hydroxy-Beta-Carotene         | NR1I3  |
| SQ | Nonadecanoic Acid                           | TYR    |
| SQ | Nonadecanoic Acid                           | SCN5A  |
| SQ | Ditertbutyl Phthalate                       | SCN5A  |
| SQ | Hexadecanoic Acid                           | TYR    |
| SQ | Hexadecanoic Acid                           | SCN5A  |
| SQ | 3,4-Dimethylbenzoic Acid                    | PTGS2  |
| SQ | 3,4-Dimethylbenzoic Acid                    | PPARA  |

|    |                                                                 |       |
|----|-----------------------------------------------------------------|-------|
| SQ | 3,4-Dimethylbenzoic Acid                                        | PPARG |
| SQ | 3,4-Dimethylbenzoic Acid                                        | PTGS1 |
| SQ | Epsilon-Cadinene                                                | SCN5A |
| SQ | Epsilon-Cadinene                                                | PPARD |
| SQ | 1-Tetradecanol                                                  | TYR   |
| SQ | 1-Tetradecanol                                                  | NCOA1 |
| SQ | 1-Tetradecanol                                                  | SCN5A |
| SQ | Cyperol                                                         | PGR   |
| SQ | Cyperol                                                         | RXRA  |
| SQ | 1-Heptadecanol                                                  | TYR   |
| SQ | 1-Heptadecanol                                                  | NCOA1 |
| SQ | 1-Heptadecanol                                                  | SCN5A |
| SQ | N-Nonanol                                                       | TYR   |
| SQ | N-Nonanol                                                       | NCOA1 |
| SQ | N-Nonanol                                                       | SCN5A |
| SQ | Acetophenone                                                    | PTGS1 |
| SQ | Acetophenone                                                    | PTGS2 |
| SQ | Enecalin                                                        | RXRA  |
| SQ | Enecalin                                                        | TNF   |
| SQ | 20-Hexadecanoylgingerol                                         | PRKCA |
| SQ | 20-Hexadecanoylgingerol                                         | PRKCB |
| SQ | Sanchinoside B1                                                 | NR3C1 |
| SQ | Alpha-Cuparenol                                                 | NR1I2 |
| SQ | Cyclododecanone                                                 | SCN5A |
| SQ | Cyclododecanone                                                 | TYR   |
| SQ | Stigmasterol                                                    | NR3C2 |
| SQ | Stigmasterol                                                    | PGR   |
| SQ | Stigmasterol                                                    | SCN5A |
| SQ | Stigmasterol                                                    | PPARD |
| SQ | Heneicosanic Acid                                               | TYR   |
| SQ | Heneicosanic Acid                                               | SCN5A |
| SQ | Coprine                                                         | NOS2  |
| SQ | Coprine                                                         | PRKCA |
| SQ | 1,1,5,5-Tetramethyl-4-Methano-2,3,4,6,7,10-Hexahydronaphthalene | SCN5A |
| SQ | 1,1,5,5-Tetramethyl-4-Methano-2,3,4,6,7,10-Hexahydronaphthalene | PPARD |
| SQ | 1,1,5,5-Tetramethyl-4-Methano-2,3,4,6,7,10-Hexahydronaphthalene | PGR   |
| SQ | Delta-Guaiene                                                   | SCN5A |
| SQ | Delta-Guaiene                                                   | PPARD |
| SQ | 1-Methyl-4-Isoallyl-Cyclohexane                                 | SCN5A |
| SQ | 1-Methyl-4-Isoallyl-Cyclohexane                                 | PPARD |
| SQ | Gamma-Sitosterol                                                | PGR   |
| SQ | Gamma-Sitosterol                                                | RXRA  |
| SQ | Gamma-Sitosterol                                                | NR3C1 |
| SQ | Pentadecanoic Acid                                              | TYR   |
| SQ | Pentadecanoic Acid                                              | SCN5A |
| DG | Dimethyl Phthalate                                              | ACHE  |
| DG | Beta-Myrcene                                                    | ADH1C |
| DG | Tetradecane                                                     | ADH1C |
| DG | Carvacrol                                                       | ALOX5 |

|    |                                              |        |
|----|----------------------------------------------|--------|
| DG | Carvacrol                                    | ACHE   |
| DG | 2',4'-Dihydroxyacetophenone                  | CHRM3  |
| DG | Beta-Elemene                                 | ADH1C  |
| DG | Azelaic Acid                                 | AKR1C3 |
| DG | Azelaic Acid                                 | CYP1A2 |
| DG | Azelaic Acid                                 | AR     |
| DG | Azelaic Acid                                 | ADH1C  |
| DG | 24,24-Dimethyl-5alpha-Cholesta-8-En-3beta-Ol | AKR1C3 |
| DG | 24,24-Dimethyl-5alpha-Cholesta-8-En-3beta-Ol | AR     |
| DG | 24,24-Dimethyl-5alpha-Cholesta-8-En-3beta-Ol | CYP3A4 |
| DG | Dimethyl Azelate                             | AR     |
| DG | Dimethyl Azelate                             | ADH1C  |
| DG | Dodecenoic Acid                              | AR     |
| DG | Dimethyl-Beta-Propiothetin                   | AKR1C3 |
| DG | Dimethyl-Beta-Propiothetin                   | CYP1A2 |
| DG | 4-Ethylresorcinol                            | ACHE   |
| DG | Dimethyl Sebacate                            | AR     |
| DG | Dimethyl Sebacate                            | ADH1C  |
| DG | Phenylacetic Acid                            | BCL2L1 |
| DG | Phenylacetic Acid                            | CA2    |
| DG | Phenylacetic Acid                            | BCL2   |
| DG | 1-Tridecene                                  | ADH1C  |
| DG | Sebiferic Acid                               | ADH1C  |
| DG | Sebiferic Acid                               | AR     |
| DG | Alpha-Terpineol                              | AR     |
| DG | Alpha-Terpineol                              | ESR2   |
| DG | Scopoletin                                   | ALOX5  |
| DG | Angelicin                                    | CYP3A4 |
| DG | Angelicin                                    | AKT1   |
| DG | Angelicin                                    | AR     |
| DG | Angelicin                                    | AKR1C3 |
| DG | Decanoic Acid                                | AKR1C3 |
| DG | Decanoic Acid                                | CYP1A2 |
| DG | Decanoic Acid                                | AR     |
| DG | Decanoic Acid                                | ADH1C  |
| DG | Dihydropinosylvin                            | ACHE   |
| DG | Dihydropinosylvin                            | ALOX5  |
| DG | Bicycloelemene                               | ADH1C  |
| DG | Alloocimene                                  | ADH1C  |
| DG | 1-Methyl-2-Dodecyl-4-(1h)-Quinolone          | F10    |
| DG | 1-Methyl-2-Dodecyl-4-(1h)-Quinolone          | F2     |
| DG | 1-Methyl-2-Dodecyl-4-(1h)-Quinolone          | BCL2   |
| DG | 1-Methyl-2-Dodecyl-4-(1h)-Quinolone          | F7     |
| DG | 1-Methyl-2-Dodecyl-4-(1h)-Quinolone          | CA2    |
| DG | Limonene                                     | ADH1C  |
| DG | Beta-Bisabolene                              | ADH1C  |
| DG | Alpha-Pinene                                 | ADH1C  |
| DG | Hexadecanoic Acid                            | AKR1C3 |
| DG | Hexadecanoic Acid                            | CYP1A2 |
| DG | Hexadecanoic Acid                            | AR     |
| DG | Hexadecanoic Acid                            | ADH1C  |
| DG | M-Ethylphenol                                | ALOX5  |

|    |                                   |        |
|----|-----------------------------------|--------|
| DG | M-Ethylphenol                     | ACHE   |
| DG | Carvacrol Acetate                 | ACHE   |
| DG | Alpha-Acoradiene                  | ADH1C  |
| DG | Isococculidine                    | CHRM3  |
| DG | Isococculidine                    | ACHE   |
| DG | O-Cresol                          | ACHE   |
| DG | Retinol                           | AR     |
| DG | 1,2-Benzenedicarboxylic Acid      | BCL2   |
| DG | 1,2-Benzenedicarboxylic Acid      | BCL2L1 |
| DG | 1,2-Benzenedicarboxylic Acid      | CA2    |
| DG | Dimethyl Camphorate               | AR     |
| DG | Dimethyl Camphorate               | ADH1C  |
| DG | Choline                           | ACHE   |
| DG | 3(S)-3-Butyl-4,5-Dihydrophthalide | CHRM3  |
| DG | 3(S)-3-Butyl-4,5-Dihydrophthalide | AR     |
| DG | Cedrol                            | AR     |
| DG | Cedrol                            | ADH1C  |
| DG | Phyllanthin                       | ESR2   |
| DG | Phyllanthin                       | ALOX5  |
| DG | Pentylbenzene                     | F2     |
| DG | Pentylbenzene                     | ALOX5  |
| DG | Camphene                          | ADH1C  |
| DG | P-Cresol                          | ACHE   |
| DG | 2-Methyl-3-Buten-2-ol             | ESR2   |
| DG | 1,2-Dimethylbenzene               | ADH1C  |
| DG | Cnidilide                         | CHRM3  |
| DG | Cnidilide                         | AR     |
| DG | Beta-Acoradiene                   | ADH1C  |
| DG | Brefeldin A                       | AR     |
| DG | Stigmasterol                      | ADH1C  |
| DG | P-Ethylphenol                     | ALOX5  |
| DG | P-Ethylphenol                     | ACHE   |
| DG | Campherenol                       | AKR1C3 |
| DG | Campherenol                       | CYP3A4 |
| DG | Beta-Caryophyllene                | ADH1C  |
| DG | 1-Dodecene                        | ADH1C  |
| DG | Guaiacol                          | ALOX5  |
| DG | M-Cresol                          | ACHE   |
| DG | Isofernone                        | ADH1C  |
| DG | Crinamine                         | ACHE   |
| DG | Alpha-Chamigrene                  | ADH1C  |
| DG | 3-Carene                          | ADH1C  |
| DG | Dimethyl Phthalate                | SCN5A  |
| DG | Beta-Myrcene                      | SCN5A  |
| DG | Beta-Myrcene                      | PPARD  |
| DG | Beta-Myrcene                      | IL1B   |
| DG | Ethanol                           | GABRE  |
| DG | Ethanol                           | NCOA1  |
| DG | Ethanol                           | GABRG3 |
| DG | Ethanol                           | GABRA3 |
| DG | Ethanol                           | GABRA6 |
| DG | Ethanol                           | GABRA2 |

|    |                                              |        |
|----|----------------------------------------------|--------|
| DG | Ethanol                                      | IL6    |
| DG | Ethanol                                      | GABRA5 |
| DG | Ethanol                                      | GABRA1 |
| DG | Ethanol                                      | SCN5A  |
| DG | Tetradecane                                  | SCN5A  |
| DG | Tetradecane                                  | PPARD  |
| DG | Tetradecane                                  | IL1B   |
| DG | Carvacrol                                    | GABRA2 |
| DG | Carvacrol                                    | TNF    |
| DG | Carvacrol                                    | GABRE  |
| DG | Carvacrol                                    | IL1B   |
| DG | Carvacrol                                    | GABRA5 |
| DG | Carvacrol                                    | RXRA   |
| DG | Carvacrol                                    | GABRA3 |
| DG | Carvacrol                                    | GABRA6 |
| DG | Carvacrol                                    | NCOA1  |
| DG | Carvacrol                                    | GABRG3 |
| DG | Carvacrol                                    | GABRA1 |
| DG | Carvacrol                                    | IL6    |
| DG | 2',4'-Dihydroxyacetophenone                  | PTGS1  |
| DG | 2',4'-Dihydroxyacetophenone                  | PTGS2  |
| DG | Uridine                                      | NQO1   |
| DG | Uridine                                      | XDH    |
| DG | Beta-Elemene                                 | SCN5A  |
| DG | Beta-Elemene                                 | PPARD  |
| DG | Beta-Elemene                                 | IL1B   |
| DG | Azelaic Acid                                 | TYR    |
| DG | Azelaic Acid                                 | SCN5A  |
| DG | Chrysanthemaxanthin                          | XDH    |
| DG | 2-Methyl-Dodecane-5-One                      | SCN5A  |
| DG | 2-Methyl-Dodecane-5-One                      | TYR    |
| DG | 24,24-Dimethyl-5alpha-Cholesta-8-En-3beta-Ol | PGR    |
| DG | 24,24-Dimethyl-5alpha-Cholesta-8-En-3beta-Ol | NR3C1  |
| DG | 24,24-Dimethyl-5alpha-Cholesta-8-En-3beta-Ol | RXRA   |
| DG | Scopolin                                     | TOP2A  |
| DG | Dimethyl Azelate                             | TYR    |
| DG | Dimethyl Azelate                             | SCN5A  |
| DG | Dodecenoic Acid                              | RXRB   |
| DG | Dodecenoic Acid                              | PPARD  |
| DG | Dodecenoic Acid                              | PTGS2  |
| DG | Dodecenoic Acid                              | PPARA  |
| DG | Dodecenoic Acid                              | PTGS1  |
| DG | Dodecenoic Acid                              | RXRA   |
| DG | Dodecenoic Acid                              | IL1B   |
| DG | Dodecenoic Acid                              | PPARG  |
| DG | Dodecenoic Acid                              | TNF    |
| DG | Dimethyl-Beta-Propiothetin                   | SCN5A  |
| DG | Dimethyl-Beta-Propiothetin                   | TYR    |
| DG | 4-Ethylresorcinol                            | GABRA2 |
| DG | 4-Ethylresorcinol                            | TNF    |
| DG | 4-Ethylresorcinol                            | IL1B   |
| DG | 4-Ethylresorcinol                            | GABRE  |



|    |                             |        |
|----|-----------------------------|--------|
| DG | 4-Ethylresorcinol           | GABRA5 |
| DG | 4-Ethylresorcinol           | RXRA   |
| DG | 4-Ethylresorcinol           | NCOA1  |
| DG | 4-Ethylresorcinol           | GABRA3 |
| DG | 4-Ethylresorcinol           | GABRA6 |
| DG | 4-Ethylresorcinol           | IL6    |
| DG | 4-Ethylresorcinol           | GABRG3 |
| DG | 4-Ethylresorcinol           | GABRA1 |
| DG | Dimethyl Sebacate           | TYR    |
| DG | Dimethyl Sebacate           | SCN5A  |
| DG | Phenylacetic Acid           | IL6    |
| DG | Phenylacetic Acid           | PTGS1  |
| DG | Phenylacetic Acid           | PPARA  |
| DG | Phenylacetic Acid           | PPARG  |
| DG | Phenylacetic Acid           | PTGS2  |
| DG | Phenylacetic Acid           | IL1B   |
| DG | 1-Tridecene                 | SCN5A  |
| DG | 1-Tridecene                 | PPARD  |
| DG | 1-Tridecene                 | IL1B   |
| DG | Sebiferic Acid              | RXRB   |
| DG | Sebiferic Acid              | PPARD  |
| DG | Sebiferic Acid              | PTGS2  |
| DG | Sebiferic Acid              | SCN5A  |
| DG | Sebiferic Acid              | TYR    |
| DG | Sebiferic Acid              | PPARA  |
| DG | Sebiferic Acid              | PTGS1  |
| DG | Sebiferic Acid              | RXRA   |
| DG | Sebiferic Acid              | IL1B   |
| DG | Sebiferic Acid              | PPARG  |
| DG | Sebiferic Acid              | TNF    |
| DG | Alpha-Terpineol             | PGR    |
| DG | Alpha-Terpineol             | NR3C1  |
| DG | Scopoletin                  | PRKCA  |
| DG | Scopoletin                  | NR1I2  |
| DG | Scopoletin                  | PRKCB  |
| DG | Angelicin                   | RXRA   |
| DG | Angelicin                   | NR3C1  |
| DG | Angelicin                   | PGR    |
| DG | Ethyl-P-Methoxycinnamate    | RXRB   |
| DG | Ethyl-P-Methoxycinnamate    | PTGS2  |
| DG | Ethyl-P-Methoxycinnamate    | RXRA   |
| DG | Ethyl-P-Methoxycinnamate    | PPARA  |
| DG | Ethyl-P-Methoxycinnamate    | TNF    |
| DG | Ethyl-P-Methoxycinnamate    | PTGS1  |
| DG | Decanoic Acid               | TYR    |
| DG | Decanoic Acid               | SCN5A  |
| DG | 12-O-Nicotinoylisolineolone | PRKCA  |
| DG | Dihydropinosylvin           | GABRA2 |
| DG | Dihydropinosylvin           | TNF    |
| DG | Dihydropinosylvin           | IL6    |
| DG | Dihydropinosylvin           | GABRE  |
| DG | Dihydropinosylvin           | GABRA5 |

|    |                                     |        |
|----|-------------------------------------|--------|
| DG | Dihydropinosylvin                   | RXRA   |
| DG | Dihydropinosylvin                   | IL1B   |
| DG | Dihydropinosylvin                   | GABRA3 |
| DG | Dihydropinosylvin                   | GABRA6 |
| DG | Dihydropinosylvin                   | GABRG3 |
| DG | Dihydropinosylvin                   | GABRA1 |
| DG | Dihydropinosylvin                   | NCOA1  |
| DG | Bicycloelemene                      | RXRA   |
| DG | Bicycloelemene                      | SCN5A  |
| DG | Bicycloelemene                      | PPARD  |
| DG | Bicycloelemene                      | RXRB   |
| DG | Bicycloelemene                      | PGR    |
| DG | Bicycloelemene                      | IL1B   |
| DG | Alloocimene                         | SCN5A  |
| DG | Alloocimene                         | PPARD  |
| DG | Alloocimene                         | IL1B   |
| DG | 1-Methyl-2-Dodecyl-4-(1h)-Quinolone | GABRA2 |
| DG | 1-Methyl-2-Dodecyl-4-(1h)-Quinolone | PTGS2  |
| DG | 1-Methyl-2-Dodecyl-4-(1h)-Quinolone | GABRA3 |
| DG | 1-Methyl-2-Dodecyl-4-(1h)-Quinolone | PTGS1  |
| DG | 1-Methyl-2-Dodecyl-4-(1h)-Quinolone | GABRA1 |
| DG | 1-Methyl-2-Dodecyl-4-(1h)-Quinolone | NQO1   |
| DG | Limonene                            | NR3C2  |
| DG | Limonene                            | PGR    |
| DG | Limonene                            | SCN5A  |
| DG | Limonene                            | PPARD  |
| DG | Limonene                            | IL1B   |
| DG | Beta-Bisabolene                     | NR3C2  |
| DG | Beta-Bisabolene                     | PGR    |
| DG | Beta-Bisabolene                     | SCN5A  |
| DG | Beta-Bisabolene                     | PPARD  |
| DG | Beta-Bisabolene                     | IL1B   |
| DG | Alpha-Pinene                        | IL1B   |
| DG | Alpha-Pinene                        | NR3C2  |
| DG | Alpha-Pinene                        | PGR    |
| DG | Alpha-Pinene                        | SCN5A  |
| DG | Alpha-Pinene                        | PPARD  |
| DG | Naphthalene                         | TNF    |
| DG | Naphthalene                         | RXRA   |
| DG | Hexadecanoic Acid                   | TYR    |
| DG | Hexadecanoic Acid                   | SCN5A  |
| DG | 6-Undecanol                         | SCN5A  |
| DG | 6-Undecanol                         | TYR    |
| DG | M-Ethylphenol                       | GABRA2 |
| DG | M-Ethylphenol                       | TNF    |
| DG | M-Ethylphenol                       | GABRE  |
| DG | M-Ethylphenol                       | IL1B   |
| DG | M-Ethylphenol                       | GABRA5 |
| DG | M-Ethylphenol                       | RXRA   |
| DG | M-Ethylphenol                       | GABRA3 |
| DG | M-Ethylphenol                       | GABRA6 |
| DG | M-Ethylphenol                       | NCOA1  |

|    |                                   |        |
|----|-----------------------------------|--------|
| DG | M-Ethylphenol                     | GABRG3 |
| DG | M-Ethylphenol                     | GABRA1 |
| DG | M-Ethylphenol                     | IL6    |
| DG | Carvacrol Acetate                 | SCN5A  |
| DG | Alpha-Acoradiene                  | NR3C2  |
| DG | Alpha-Acoradiene                  | PGR    |
| DG | Alpha-Acoradiene                  | SCN5A  |
| DG | Alpha-Acoradiene                  | PPARD  |
| DG | Alpha-Acoradiene                  | IL1B   |
| DG | Adenine                           | PIM1   |
| DG | O-Cresol                          | GABRA2 |
| DG | O-Cresol                          | TNF    |
| DG | O-Cresol                          | GABRE  |
| DG | O-Cresol                          | GABRA5 |
| DG | O-Cresol                          | RXRA   |
| DG | O-Cresol                          | NCOA1  |
| DG | O-Cresol                          | GABRA3 |
| DG | O-Cresol                          | GABRA6 |
| DG | O-Cresol                          | IL6    |
| DG | O-Cresol                          | GABRG3 |
| DG | O-Cresol                          | GABRA1 |
| DG | O-Cresol                          | IL1B   |
| DG | Retinol                           | RXRB   |
| DG | Retinol                           | PGR    |
| DG | Retinol                           | RXRA   |
| DG | 1,2-Benzenedicarboxylic Acid      | PTGS2  |
| DG | 1,2-Benzenedicarboxylic Acid      | IL6    |
| DG | 1,2-Benzenedicarboxylic Acid      | PPARA  |
| DG | 1,2-Benzenedicarboxylic Acid      | PPARG  |
| DG | 1,2-Benzenedicarboxylic Acid      | PTGS1  |
| DG | 1,2-Benzenedicarboxylic Acid      | IL1B   |
| DG | Dimethyl Camphorate               | TYR    |
| DG | 3(S)-3-Butyl-4,5-Dihydrophthalide | NR3C1  |
| DG | 3(S)-3-Butyl-4,5-Dihydrophthalide | NR3C2  |
| DG | 3(S)-3-Butyl-4,5-Dihydrophthalide | PGR    |
| DG | 1-Tetradecanol                    | GABRG3 |
| DG | 1-Tetradecanol                    | GABRA3 |
| DG | 1-Tetradecanol                    | GABRA6 |
| DG | 1-Tetradecanol                    | TYR    |
| DG | 1-Tetradecanol                    | GABRA2 |
| DG | 1-Tetradecanol                    | NCOA1  |
| DG | 1-Tetradecanol                    | GABRA5 |
| DG | 1-Tetradecanol                    | GABRA1 |
| DG | 1-Tetradecanol                    | IL6    |
| DG | 1-Tetradecanol                    | GABRE  |
| DG | 1-Tetradecanol                    | SCN5A  |
| DG | Anisic Acid                       | RXRB   |
| DG | Anisic Acid                       | PTGS2  |
| DG | Anisic Acid                       | TNF    |
| DG | Anisic Acid                       | PPARA  |
| DG | Anisic Acid                       | RXRA   |
| DG | Anisic Acid                       | NFKBIA |

|    |                        |        |
|----|------------------------|--------|
| DG | Anisic Acid            | PTGS1  |
| DG | Anisic Acid            | PPARG  |
| DG | Phyllanthin            | NR1I2  |
| DG | Camphene               | SCN5A  |
| DG | Camphene               | PPARD  |
| DG | Camphene               | IL1B   |
| DG | 20-Hexadecanoylingenol | PRKCA  |
| DG | 20-Hexadecanoylingenol | PRKCB  |
| DG | P-Cresol               | GABRA2 |
| DG | P-Cresol               | TNF    |
| DG | P-Cresol               | GABRE  |
| DG | P-Cresol               | GABRA5 |
| DG | P-Cresol               | RXRA   |
| DG | P-Cresol               | NCOA1  |
| DG | P-Cresol               | GABRA3 |
| DG | P-Cresol               | GABRA6 |
| DG | P-Cresol               | IL6    |
| DG | P-Cresol               | GABRG3 |
| DG | P-Cresol               | GABRA1 |
| DG | P-Cresol               | IL1B   |
| DG | 2-Methyl-3-Buten-2-Ol  | PGR    |
| DG | 1,2-Dimethylbenzene    | SCN5A  |
| DG | 1,2-Dimethylbenzene    | PPARD  |
| DG | 1,2-Dimethylbenzene    | IL1B   |
| DG | Cnidilide              | NR3C1  |
| DG | Cnidilide              | NR3C2  |
| DG | Cnidilide              | PGR    |
| DG | Beta-Acoradiene        | NR3C2  |
| DG | Beta-Acoradiene        | PGR    |
| DG | Beta-Acoradiene        | SCN5A  |
| DG | Beta-Acoradiene        | PPARD  |
| DG | Beta-Acoradiene        | IL1B   |
| DG | Decanal                | SCN5A  |
| DG | Decanal                | TYR    |
| DG | Brefeldin A            | PGR    |
| DG | Stigmasterol           | IL1B   |
| DG | Stigmasterol           | NR3C2  |
| DG | Stigmasterol           | PGR    |
| DG | Stigmasterol           | SCN5A  |
| DG | Stigmasterol           | PPARD  |
| DG | Nonanal                | SCN5A  |
| DG | Nonanal                | TYR    |
| DG | Vitamin B12            | NOS2   |
| DG | 1-Hexadecanol          | GABRG3 |
| DG | 1-Hexadecanol          | GABRA3 |
| DG | 1-Hexadecanol          | GABRA6 |
| DG | 1-Hexadecanol          | TYR    |
| DG | 1-Hexadecanol          | GABRA2 |
| DG | 1-Hexadecanol          | NCOA1  |
| DG | 1-Hexadecanol          | GABRA5 |
| DG | 1-Hexadecanol          | GABRA1 |
| DG | 1-Hexadecanol          | IL6    |

|    |                    |        |
|----|--------------------|--------|
| DG | 1-Hexadecanol      | GABRE  |
| DG | 1-Hexadecanol      | SCN5A  |
| DG | 4-Octanone         | SCN5A  |
| DG | P-Ethylphenol      | GABRA2 |
| DG | P-Ethylphenol      | TNF    |
| DG | P-Ethylphenol      | GABRE  |
| DG | P-Ethylphenol      | IL1B   |
| DG | P-Ethylphenol      | GABRA5 |
| DG | P-Ethylphenol      | RXRA   |
| DG | P-Ethylphenol      | GABRA3 |
| DG | P-Ethylphenol      | GABRA6 |
| DG | P-Ethylphenol      | NCOA1  |
| DG | P-Ethylphenol      | GABRG3 |
| DG | P-Ethylphenol      | GABRA1 |
| DG | P-Ethylphenol      | IL6    |
| DG | Campherenol        | RXRA   |
| DG | Campherenol        | PGR    |
| DG | Beta-Caryophyllene | SCN5A  |
| DG | Beta-Caryophyllene | PPARD  |
| DG | Beta-Caryophyllene | IL1B   |
| DG | 1-Dodecene         | SCN5A  |
| DG | 1-Dodecene         | PPARD  |
| DG | 1-Dodecene         | IL1B   |
| DG | Guaiacol           | TYR    |
| DG | Guaiacol           | PRKCA  |
| DG | Guaiacol           | NR1I2  |
| DG | Guaiacol           | PRKCB  |
| DG | Isoeugenol         | TYR    |
| DG | M-Cresol           | GABRA2 |
| DG | M-Cresol           | TNF    |
| DG | M-Cresol           | GABRE  |
| DG | M-Cresol           | GABRA5 |
| DG | M-Cresol           | RXRA   |
| DG | M-Cresol           | NCOA1  |
| DG | M-Cresol           | GABRA3 |
| DG | M-Cresol           | GABRA6 |
| DG | M-Cresol           | IL6    |
| DG | M-Cresol           | GABRG3 |
| DG | M-Cresol           | GABRA1 |
| DG | M-Cresol           | IL1B   |
| DG | Isofernene         | IL1B   |
| DG | Isofernene         | NR3C2  |
| DG | Isofernene         | PGR    |
| DG | Isofernene         | SCN5A  |
| DG | Isofernene         | PPARD  |
| DG | 6-Undecanone       | SCN5A  |
| DG | 6-Undecanone       | TYR    |
| DG | Alpha-Chamigrene   | IL1B   |
| DG | Alpha-Chamigrene   | NR3C2  |
| DG | Alpha-Chamigrene   | PGR    |
| DG | Alpha-Chamigrene   | SCN5A  |
| DG | Alpha-Chamigrene   | PPARD  |

|    |                        |        |
|----|------------------------|--------|
| DG | 3-Carene               | SCN5A  |
| DG | 3-Carene               | PPARD  |
| DG | 3-Carene               | IL1B   |
| DG | 3-Carene               | PGR    |
| HQ | Choline                | ACHE   |
| HQ | Uridine                | NQO1   |
| HQ | Uridine                | XDH    |
| HQ | Astragaloside Ii       | CYP3A4 |
| HQ | Chrysanthemaxanthin    | XDH    |
| HQ | Soyasaponin 1          | NR3C1  |
| HQ | Lupeol                 | PGR    |
| HQ | Lupeol                 | AKR1C3 |
| HQ | Lupeol                 | CYP3A4 |
| HQ | Lupeol                 | RXRA   |
| HQ | 20-Hexadecanoylingenol | PRKCA  |
| HQ | 20-Hexadecanoylingenol | PRKCB  |
| HQ | Beta-Sitosterol        | CYP3A4 |
| HQ | Beta-Sitosterol        | PGR    |
| HQ | Beta-Sitosterol        | AR     |
| HQ | Beta-Sitosterol        | RXRA   |
| HQ | Beta-Sitosterol        | NR3C1  |
| HQ | Beta-Sitosterol        | AKR1C3 |
| HQ | Betaine                | LYZ    |
| HQ | Soyasapogenol B        | PGR    |
| HQ | Soyasapogenol B        | AR     |
| HQ | Soyasapogenol B        | NR3C1  |
| HQ | Kaempferol             | NQO1   |
| HQ | Gamma-Sitosterol       | CYP3A4 |
| HQ | Gamma-Sitosterol       | PGR    |
| HQ | Gamma-Sitosterol       | AR     |
| HQ | Gamma-Sitosterol       | RXRA   |
| HQ | Gamma-Sitosterol       | NR3C1  |
| HQ | Gamma-Sitosterol       | AKR1C3 |
| HQ | Astragaloside I        | CYP3A4 |
| HQ | 3,5-Dimethoxystilbene  | IL1B   |
| HQ | Adenine                | PIM1   |
| HQ | Sucrose                | TNF    |
| HQ | Canavanine             | LYZ    |
| HQ | Canavanine             | NOS2   |
| HQ | Canavanine             | IL1B   |

|              |            |        |
|--------------|------------|--------|
| <b>TCMIP</b> |            |        |
| DH           | Kaempferol | AHR    |
| DH           | Kaempferol | AKT1   |
| DH           | Kaempferol | CA2    |
| DH           | Kaempferol | ESR2   |
| DH           | Kaempferol | GABRA1 |
| DH           | Kaempferol | GABRA2 |
| DH           | Kaempferol | GABRA3 |
| DH           | Kaempferol | GABRA5 |
| DH           | Kaempferol | GABRA6 |
| DH           | Kaempferol | GABRG3 |

|    |                                         |        |
|----|-----------------------------------------|--------|
| DH | Kaempferol                              | NCOA1  |
| DH | Kaempferol                              | NCOA2  |
| DH | Kaempferol                              | NR1I2  |
| DH | Kaempferol                              | PIK3CG |
| DH | Kaempferol                              | PIM1   |
| DH | Kaempferol                              | PRKACA |
| DH | Kaempferol                              | PRKCA  |
| DH | Kaempferol                              | TOP2A  |
| DH | Physcion                                | AHR    |
| DH | Physcion                                | ALOX5  |
| DH | Physcion                                | CYP1A2 |
| DH | Physcion                                | CYP3A4 |
| DH | Physcion                                | GSTP1  |
| DH | Epicatechin                             | AHR    |
| DH | Epicatechin                             | AKT1   |
| DH | Epicatechin                             | ESR2   |
| DH | Epicatechin                             | NCOA1  |
| DH | Epicatechin                             | NCOA2  |
| DH | Epicatechin                             | NR1I2  |
| DH | Epicatechin                             | PIK3CG |
| DH | Epicatechin                             | PIM1   |
| DH | Epicatechin                             | TOP2A  |
| DH | Kaempferol-3-Rhamnoside                 | AHR    |
| DH | Kaempferol-3-Rhamnoside                 | AKR1C3 |
| DH | Kaempferol-3-Rhamnoside                 | AKT1   |
| DH | Kaempferol-3-Rhamnoside                 | CA2    |
| DH | Kaempferol-3-Rhamnoside                 | ESR2   |
| DH | Kaempferol-3-Rhamnoside                 | GABRA1 |
| DH | Kaempferol-3-Rhamnoside                 | GABRA2 |
| DH | Kaempferol-3-Rhamnoside                 | GABRA3 |
| DH | Kaempferol-3-Rhamnoside                 | GABRA5 |
| DH | Kaempferol-3-Rhamnoside                 | GABRA6 |
| DH | Kaempferol-3-Rhamnoside                 | GABRG3 |
| DH | Kaempferol-3-Rhamnoside                 | NCOA1  |
| DH | Kaempferol-3-Rhamnoside                 | NCOA2  |
| DH | Kaempferol-3-Rhamnoside                 | NR1I2  |
| DH | Kaempferol-3-Rhamnoside                 | PIK3CG |
| DH | Kaempferol-3-Rhamnoside                 | PIM1   |
| DH | Kaempferol-3-Rhamnoside                 | PRKACA |
| DH | Kaempferol-3-Rhamnoside                 | PRKCA  |
| DH | Kaempferol-3-Rhamnoside                 | TOP2A  |
| DH | Gallic Acid                             | PTGS1  |
| DH | Gallic Acid                             | PTGS2  |
| DH | 1-O-Galloyl-Glucose                     | AHR    |
| DH | 1-O-Galloyl-Glucose                     | AKR1C3 |
| DH | 1-O-Galloyl-Glucose                     | AR     |
| DH | 1-O-Galloyl-Glucose                     | PTGS1  |
| DH | 1-O-Galloyl-Glucose                     | TYR    |
| DH | 1,2,6-Tri-O-Galloyl- $\beta$ -D-Glucose | AHR    |
| DH | 1,2,6-Tri-O-Galloyl- $\beta$ -D-Glucose | AKR1C3 |
| DH | 1,2,6-Tri-O-Galloyl- $\beta$ -D-Glucose | AR     |
| DH | 1,2,6-Tri-O-Galloyl- $\beta$ -D-Glucose | TYR    |

|    |                                             |        |
|----|---------------------------------------------|--------|
| DH | Emodin                                      | AHR    |
| DH | Emodin                                      | ALOX5  |
| DH | Emodin                                      | CYP1A2 |
| DH | Emodin                                      | CYP3A4 |
| DH | Emodin                                      | GSTP1  |
| DH | Proanthocyanidin B2                         | AHR    |
| DH | Proanthocyanidin B2                         | ESR2   |
| DH | Proanthocyanidin B2                         | NR1I2  |
| DH | Proanthocyanidin B2                         | PIK3CG |
| DH | Proanthocyanidin B2                         | PIM1   |
| DH | Procyanidin B1                              | AHR    |
| DH | Procyanidin B1                              | ESR2   |
| DH | Procyanidin B1                              | NR1I2  |
| DH | Procyanidin B1                              | PIK3CG |
| DH | Procyanidin B1                              | PIM1   |
| DH | Procyanidin B3                              | AHR    |
| DH | Procyanidin B3                              | ESR2   |
| DH | Procyanidin B3                              | NR1I2  |
| DH | Procyanidin B3                              | PIK3CG |
| DH | Procyanidin B3                              | PIM1   |
| DH | Chrysophanol                                | AHR    |
| DH | Chrysophanol                                | ALOX5  |
| DH | Chrysophanol                                | CYP1A2 |
| DH | Chrysophanol                                | CYP3A4 |
| DH | Chrysophanol                                | GSTP1  |
| DH | Catechin                                    | AHR    |
| DH | Catechin                                    | AKT1   |
| DH | Catechin                                    | ESR2   |
| DH | Catechin                                    | NCOA1  |
| DH | Catechin                                    | NCOA2  |
| DH | Catechin                                    | NR1I2  |
| DH | Catechin                                    | PIK3CG |
| DH | Catechin                                    | PIM1   |
| DH | Catechin                                    | TOP2A  |
| DH | Physcion-8- $\beta$ -D-Glucopyranoside      | AHR    |
| DH | Physcion-8- $\beta$ -D-Glucopyranoside      | AKR1C3 |
| DH | Physcion-8- $\beta$ -D-Glucopyranoside      | AR     |
| DH | Chrysophanol-9-anthrone                     | AHR    |
| DH | Rheinoseide                                 | IL1B   |
| DH | Rheinoseide                                 | IL6    |
| DH | Rheinoseide                                 | TNF    |
| DH | Torachryson-8-O- $\beta$ -D-Glucopyranoside | AHR    |
| DH | Torachryson-8-O- $\beta$ -D-Glucopyranoside | AKR1C3 |
| DH | Torachryson-8-O- $\beta$ -D-Glucopyranoside | AR     |
| DH | Torachryson-8-O- $\beta$ -D-Glucopyranoside | TOP2A  |
| DH | 2-O-Cinnamoyl- $\beta$ -D-Glucose           | AR     |
| DH | 2-O-Cinnamoyl- $\beta$ -D-Glucose           | PTGS1  |
| DH | 2-O-Cinnamoyl- $\beta$ -D-Glucose           | TYR    |
| DH | Procyanidin B4                              | AHR    |
| DH | Procyanidin B4                              | ESR2   |
| DH | Procyanidin B4                              | NR1I2  |
| DH | Procyanidin B4                              | PIK3CG |



|    |                                      |        |
|----|--------------------------------------|--------|
| DH | Procyanidin B4                       | PIM1   |
| DH | Phlinoside B                         | AR     |
| DH | Phlinoside D                         | AHR    |
| DH | Sennosidec                           | AHR    |
| DH | Sennosidec                           | AKR1C3 |
| DH | Sennosidec                           | AR     |
| DH | Sennosidec                           | TYR    |
| DH | Sennosided                           | AHR    |
| DH | Sennosided                           | AKR1C3 |
| DH | Sennosided                           | AR     |
| DH | Sennosided                           | TYR    |
| DH | Sennidinb                            | AHR    |
| DH | Sennidinb                            | ALOX5  |
| DH | Sennidinb                            | CYP1A2 |
| DH | Sennidinb                            | CYP3A4 |
| DH | Sennidinb                            | GSTP1  |
| DH | Sennidinb                            | PTGS1  |
| DH | Sennidinb                            | PTGS2  |
| DH | Procyanidinb6                        | AHR    |
| DH | Procyanidinb6                        | ESR2   |
| DH | Procyanidinb6                        | NR1I2  |
| DH | Procyanidinb6                        | PIK3CG |
| DH | Procyanidinb6                        | PIM1   |
| DH | Aloeemodin-1-O-β-D-Glucopyranoside   | AHR    |
| DH | Aloeemodin-1-O-β-D-Glucopyranoside   | AKR1C3 |
| DH | Aloeemodin-1-O-β-D-Glucopyranoside   | AR     |
| DH | Aloeemodin-1-O-β-D-Glucopyranoside   | TYR    |
| DH | (+)-Catechin-5-O-Glucoside           | AHR    |
| DH | (+)-Catechin-5-O-Glucoside           | AKR1C3 |
| DH | (+)-Catechin-5-O-Glucoside           | AR     |
| DH | (+)-Catechin-5-O-Glucoside           | TYR    |
| DH | Chrysophanol-8-O-β-D-Glucopyranoside | AHR    |
| DH | Chrysophanol-8-O-β-D-Glucopyranoside | AKR1C3 |
| DH | Chrysophanol-8-O-β-D-Glucopyranoside | AR     |
| DH | Chrysophanol-8-O-β-D-Glucopyranoside | TOP2A  |
| DH | Chrysophanol-8-O-β-D-Glucopyranoside | TYR    |
| DH | Chrysophanol-1-O-β-D-Glucoside       | AHR    |
| DH | Chrysophanol-1-O-β-D-Glucoside       | AKR1C3 |
| DH | Chrysophanol-1-O-β-D-Glucoside       | AR     |
| DH | Chrysophanol-1-O-β-D-Glucoside       | TOP2A  |
| DH | Chrysophanol-1-O-β-D-Glucoside       | TYR    |
| DH | 2-O-Cinnamoyl-Glucogallin            | AKR1C3 |
| DH | 2-O-Cinnamoyl-Glucogallin            | AR     |
| DH | 2-O-Cinnamoyl-Glucogallin            | TYR    |
| DH | 2-Cinnamoyl-Glucose                  | AR     |
| DH | 2-Cinnamoyl-Glucose                  | PTGS1  |
| DH | 2-Cinnamoyl-Glucose                  | TYR    |
| DH | DTXSID601129572                      | AKR1C3 |
| DH | DTXSID601129572                      | AR     |
| DH | DTXSID601129572                      | TYR    |
| DH | 1,6-Di-O-Galloyl-β-D-Glucose         | AHR    |
| DH | 1,6-Di-O-Galloyl-β-D-Glucose         | AKR1C3 |

|    |                                          |        |
|----|------------------------------------------|--------|
| DH | 1,6-Di-O-Galloyl- $\beta$ -Glucose       | AR     |
| DH | 1,6-Di-O-Galloyl- $\beta$ -Glucose       | TYR    |
| DH | Emodin-1-O- $\beta$ -D-Glucopyranoside   | AHR    |
| DH | Emodin-1-O- $\beta$ -D-Glucopyranoside   | AKR1C3 |
| DH | Emodin-1-O- $\beta$ -D-Glucopyranoside   | AR     |
| DH | Emodin-1-O- $\beta$ -D-Glucopyranoside   | TOP2A  |
| DH | Emodin-1-O- $\beta$ -D-Glucopyranoside   | TYR    |
| DH | (-)-Epicatechin gallate                  | AHR    |
| DH | (-)-Epicatechin gallate                  | AKR1C3 |
| DH | (-)-Epicatechin gallate                  | AKT1   |
| DH | (-)-Epicatechin gallate                  | AR     |
| DH | (-)-Epicatechin gallate                  | ESR2   |
| DH | (-)-Epicatechin gallate                  | GABRA1 |
| DH | (-)-Epicatechin gallate                  | GABRA2 |
| DH | (-)-Epicatechin gallate                  | GABRA3 |
| DH | (-)-Epicatechin gallate                  | GABRA5 |
| DH | (-)-Epicatechin gallate                  | GABRA6 |
| DH | (-)-Epicatechin gallate                  | GABRG3 |
| DH | (-)-Epicatechin gallate                  | NCOA1  |
| DH | (-)-Epicatechin gallate                  | NCOA2  |
| DH | (-)-Epicatechin gallate                  | NR1I2  |
| DH | (-)-Epicatechin gallate                  | PIK3CG |
| DH | (-)-Epicatechin gallate                  | PIM1   |
| DH | (-)-Epicatechin gallate                  | TOP2A  |
| DH | Gallic Acid-3-O-(6'-O-Galloyl)Glucoside  | AHR    |
| DH | Gallic Acid-3-O-(6'-O-Galloyl)Glucoside  | AKR1C3 |
| DH | Gallic Acid-3-O-(6'-O-Galloyl)Glucoside  | AR     |
| DH | Gallic Acid-3-O-(6'-O-Galloyl)Glucoside  | TYR    |
| DH | Gallic Acid-4-O-(6'-O-Galloyl)-Glucoside | AHR    |
| DH | Gallic Acid-4-O-(6'-O-Galloyl)-Glucoside | AKR1C3 |
| DH | Gallic Acid-4-O-(6'-O-Galloyl)-Glucoside | AR     |
| DH | Gallic Acid-4-O-(6'-O-Galloyl)-Glucoside | TYR    |
| DH | 6-O-Galloyl-Glucose                      | AHR    |
| DH | 6-O-Galloyl-Glucose                      | AKR1C3 |
| DH | 6-O-Galloyl-Glucose                      | AR     |
| DH | 6-O-Galloyl-Glucose                      | TYR    |
| DH | Isolindleyin                             | TYR    |
| DH | Palmidin C                               | AHR    |
| DH | Palmidin C                               | ALOX5  |
| DH | Palmidin C                               | BCL2L1 |
| DH | Palmidin C                               | CYP1A2 |
| DH | Palmidin C                               | CYP3A4 |
| DH | Palmidin C                               | GSTP1  |
| DH | Physcion-8-O- $\beta$ -D-Gentiobioside   | AHR    |
| DH | Physcion-8-O- $\beta$ -D-Gentiobioside   | AKR1C3 |
| DH | Physcion-8-O- $\beta$ -D-Gentiobioside   | AR     |
| DH | Physcion-8-O- $\beta$ -D-Glucopyranoside | AHR    |
| DH | Physcion-8-O- $\beta$ -D-Glucopyranoside | AKR1C3 |
| DH | Physcion-8-O- $\beta$ -D-Glucopyranoside | AR     |
| DH | Physcion-8-O- $\beta$ -D-Glucopyranoside | TYR    |
| DH | Piceid                                   | AR     |
| DH | Piceid                                   | PTGS1  |

|    |                                                      |        |
|----|------------------------------------------------------|--------|
| DH | Piceid                                               | TYR    |
| DH | Procyanidin B1 3'-O-Gallate                          | AHR    |
| DH | Procyanidin B1 3'-O-Gallate                          | AKR1C3 |
| DH | Procyanidin B1 3'-O-Gallate                          | AR     |
| DH | Procyanidin B1 3'-O-Gallate                          | CA2    |
| DH | Procyanidin B1 3'-O-Gallate                          | ESR2   |
| DH | Procyanidin B1 3'-O-Gallate                          | NR1I2  |
| DH | Procyanidin B1 3'-O-Gallate                          | PIK3CG |
| DH | Procyanidin B1 3'-O-Gallate                          | PIM1   |
| DH | Procyanidin B1 3'-O-Gallate                          | PRKACA |
| DH | Procyanidin B1 3'-O-Gallate                          | PRKCA  |
| DH | Procyanidin B2 3,3'-Di-O-Gallate                     | AHR    |
| DH | Procyanidin B2 3,3'-Di-O-Gallate                     | AKR1C3 |
| DH | Procyanidin B2 3,3'-Di-O-Gallate                     | AR     |
| DH | Procyanidin B2 3,3'-Di-O-Gallate                     | CA2    |
| DH | Procyanidin B2 3,3'-Di-O-Gallate                     | ESR2   |
| DH | Procyanidin B2 3,3'-Di-O-Gallate                     | NQO1   |
| DH | Procyanidin B2 3,3'-Di-O-Gallate                     | NR1I2  |
| DH | Procyanidin B2 3,3'-Di-O-Gallate                     | PIK3CG |
| DH | Procyanidin B2 3,3'-Di-O-Gallate                     | PIM1   |
| DH | Procyanidin B2 3,3'-Di-O-Gallate                     | PRKACA |
| DH | Procyanidin B2 3,3'-Di-O-Gallate                     | PRKCA  |
| DH | Resveratrol-4'-O-(6"-O-Galloyl)-I'-D-Glucopyranoside | AHR    |
| DH | Resveratrol-4'-O-(6"-O-Galloyl)-I'-D-Glucopyranoside | AKR1C3 |
| DH | Resveratrol-4'-O-(6"-O-Galloyl)-I'-D-Glucopyranoside | AR     |
| DH | Resveratrol-4'-O-(6"-O-Galloyl)-I'-D-Glucopyranoside | TYR    |
| DH | Resveratrol-4'-O-I'-D-Glucoside                      | AR     |
| DH | Resveratrol-4'-O-I'-D-Glucoside                      | PTGS1  |
| DH | Resveratrol-4'-O-I'-D-Glucoside                      | TYR    |
| DH | Rhein A                                              | AHR    |
| DH | Rhein A                                              | ALOX5  |
| DH | Rhein A                                              | CYP1A2 |
| DH | Rhein A                                              | CYP3A4 |
| DH | Rhein A                                              | GSTP1  |
| DH | Rhein B                                              | AHR    |
| DH | Rhein B                                              | ALOX5  |
| DH | Rhein B                                              | CYP1A2 |
| DH | Rhein B                                              | CYP3A4 |
| DH | Rhein B                                              | GSTP1  |
| DH | Rhein C                                              | ALOX5  |
| DH | Rhein C                                              | CYP1A2 |
| DH | Rhein C                                              | CYP3A4 |
| DH | Rhein C                                              | GSTP1  |
| DH | Rhein                                                | AHR    |
| DH | Rhein                                                | ALOX5  |
| DH | Rhein                                                | CYP1A2 |
| DH | Rhein                                                | CYP3A4 |
| DH | Rhein                                                | GSTP1  |

|    |                                                    |        |
|----|----------------------------------------------------|--------|
| DH | Rhein                                              | PTGS1  |
| DH | Rhein                                              | PTGS2  |
| DH | Rhein-8-O- $\beta$ -D-Glucopyranoside              | AHR    |
| DH | Rhein-8-O- $\beta$ -D-Glucopyranoside              | AKR1C3 |
| DH | Rhein-8-O- $\beta$ -D-Glucopyranoside              | AR     |
| DH | Rhein-8-O- $\beta$ -D-Glucopyranoside              | TYR    |
| DH | Rheinioside A                                      | AHR    |
| DH | Rheinioside A                                      | AKR1C3 |
| DH | Rheinioside A                                      | AR     |
| DH | Rheinioside B                                      | AHR    |
| DH | Rheinioside B                                      | AKR1C3 |
| DH | Rheinioside B                                      | AR     |
| DH | Rheinioside C                                      | AHR    |
| DH | Rheinioside C                                      | AKR1C3 |
| DH | Rheinioside C                                      | AR     |
| DH | Rheinioside C                                      | TYR    |
| DH | Rheinioside D                                      | AHR    |
| DH | Rheinioside D                                      | AKR1C3 |
| DH | Rheinioside D                                      | AR     |
| DH | Rheinioside D                                      | TYR    |
| DH | Rhein-8-O- $\beta$ -D-(6'-Oxalyl)-Glucopyra-Noside | AHR    |
| DH | Rhein-8-O- $\beta$ -D-(6'-Oxalyl)-Glucopyra-Noside | AKR1C3 |
| DH | Rhein-8-O- $\beta$ -D-(6'-Oxalyl)-Glucopyra-Noside | AR     |
| DH | Rhein-8-O- $\beta$ -D-(6'-Oxalyl)-Glucopyra-Noside | TYR    |
| DH | Sennidin A                                         | AHR    |
| DH | Sennidin A                                         | ALOX5  |
| DH | Sennidin A                                         | CYP1A2 |
| DH | Sennidin A                                         | CYP3A4 |
| DH | Sennidin A                                         | GSTP1  |
| DH | Sennidin A                                         | PTGS1  |
| DH | Sennidin A                                         | PTGS2  |
| DH | Sennoside A                                        | AHR    |
| DH | Sennoside A                                        | AKR1C3 |
| DH | Sennoside A                                        | AR     |
| DH | Sennoside A                                        | TYR    |
| DH | Sennoside C                                        | AHR    |
| DH | Sennoside C                                        | AKR1C3 |
| DH | Sennoside C                                        | AR     |
| DH | Sennoside C                                        | TYR    |
| DH | 3,4,3',5'-Tetrahydroxystilbene-3-Glucoside         | AKR1C3 |
| DH | 3,4,3',5'-Tetrahydroxystilbene-3-Glucoside         | AR     |
| DH | 3,4,3',5'-Tetrahydroxystilbene-3-Glucoside         | PTGS1  |
| DH | 3,4,3',5'-Tetrahydroxystilbene-3-Glucoside         | TYR    |
| DH | Anthraglycoside B                                  | AHR    |
| DH | Anthraglycoside B                                  | AKR1C3 |
| DH | Anthraglycoside B                                  | AR     |
| DH | Anthraglycoside B                                  | TOP2A  |
| DH | Anthraglycoside B                                  | TYR    |
| DH | 5-Carboxy-7-Glucosyloxy-2-Methyl-Benzopyran-1'-One | AHR    |
| DH | 5-Carboxy-7-Glucosyloxy-2-Methyl-Benzopyran-1'-One | AKR1C3 |

|    |                                                    |        |
|----|----------------------------------------------------|--------|
| DH | 5-Carboxy-7-Glucosyloxy-2-Methyl-Benzopyran-1'-One | AR     |
| DH | 5-Carboxy-7-Glucosyloxy-2-Methyl-Benzopyran-1'-One | TYR    |
| DH | 5-Carboxy-7-Hydroxy-2-Methyl-Benzopyran-1'-One     | ALOX5  |
| DH | 5-Carboxy-7-Hydroxy-2-Methyl-Benzopyran-1'-One     | CA2    |
| DH | 5-Carboxy-7-Hydroxy-2-Methyl-Benzopyran-1'-One     | NQO1   |
| DH | 5-Carboxy-7-Hydroxy-2-Methyl-Benzopyran-1'-One     | PRKACA |
| DH | 5-Carboxy-7-Hydroxy-2-Methyl-Benzopyran-1'-One     | PRKCA  |
| DH | Cassiachromone                                     | NR1I2  |
| DH | 1-O-Galloyl-Glycerol                               | PTGS1  |
| DH | 1-O-Galloyl-Glycerol                               | PTGS2  |
| DH | 6-Hydroxymusizin-8-O-1'-D-Glucoside                | AHR    |
| DH | 6-Hydroxymusizin-8-O-1'-D-Glucoside                | AKR1C3 |
| DH | 6-Hydroxymusizin-8-O-1'-D-Glucoside                | AR     |
| DH | 6-Hydroxymusizin-8-O-1'-D-Glucoside                | TYR    |
| DH | 2-Methyl-5-Carboxymethyl-7-Hydroxychromanone       | NR1I2  |
| DH | 2-Methyl-5-Carboxymethyl-7-Hydroxychromone         | NR1I2  |
| DH | Musizin-8-O-1'-D-Glucoside                         | AHR    |
| DH | Musizin-8-O-1'-D-Glucoside                         | AKR1C3 |
| DH | Musizin-8-O-1'-D-Glucoside                         | AR     |
| DH | Musizin-8-O-1'-D-Glucoside                         | TYR    |
| DH | Phenylbutanone-Glucoside                           | TYR    |
| DH | Rhaponticin                                        | AHR    |
| DH | Rhaponticin                                        | AKR1C3 |
| DH | Rhaponticin                                        | AR     |
| DH | Rhaponticin                                        | TYR    |
| DH | Sennoside B                                        | AHR    |
| DH | Sennoside B                                        | AKR1C3 |
| DH | Sennoside B                                        | AR     |
| DH | Sennoside B                                        | TYR    |
| DH | Torachryson-8-O-1'-D-Glucoside                     | AHR    |
| DH | Torachryson-8-O-1'-D-Glucoside                     | AKR1C3 |
| DH | Torachryson-8-O-1'-D-Glucoside                     | AR     |
| DH | Torachryson-8-O-1'-D-Glucoside                     | TYR    |
| DH | Torachryson-8-O-1'-D-(6'-Oxayl)-Glucoside          | AHR    |
| DH | Torachryson-8-O-1'-D-(6'-Oxayl)-Glucoside          | AKR1C3 |
| DH | Torachryson-8-O-1'-D-(6'-Oxayl)-Glucoside          | AR     |
| DH | Procyanidin B1-6-C-1'-D-Glucopyranoside            | AHR    |
| DH | Procyanidin B1-6-C-1'-D-Glucopyranoside            | AKR1C3 |
| DH | Procyanidin B1-6-C-1'-D-Glucopyranoside            | AR     |
| SQ | Clionasterol                                       | AR     |
| SQ | Clionasterol                                       | ESR2   |
| SQ | Clionasterol                                       | GABRA1 |
| SQ | Clionasterol                                       | GABRA2 |
| SQ | Clionasterol                                       | GABRA3 |
| SQ | Clionasterol                                       | GABRA5 |
| SQ | Clionasterol                                       | GABRA6 |
| SQ | Clionasterol                                       | GABRE  |
| SQ | Clionasterol                                       | GABRG3 |
| SQ | Clionasterol                                       | NCOA2  |
| SQ | Clionasterol                                       | NR1I2  |

|    |               |        |
|----|---------------|--------|
| SQ | Clionasterol  | NR1I3  |
| SQ | Clionasterol  | PGR    |
| SQ | Clionasterol  | PPARA  |
| SQ | Quercetin     | AHR    |
| SQ | Quercetin     | AKT1   |
| SQ | Quercetin     | CA2    |
| SQ | Quercetin     | ESR2   |
| SQ | Quercetin     | GABRA1 |
| SQ | Quercetin     | GABRA2 |
| SQ | Quercetin     | GABRA3 |
| SQ | Quercetin     | GABRA5 |
| SQ | Quercetin     | GABRA6 |
| SQ | Quercetin     | GABRG3 |
| SQ | Quercetin     | NCOA1  |
| SQ | Quercetin     | NCOA2  |
| SQ | Quercetin     | NR1I2  |
| SQ | Quercetin     | PIK3CG |
| SQ | Quercetin     | PIM1   |
| SQ | Quercetin     | PRKACA |
| SQ | Quercetin     | PRKCA  |
| SQ | Quercetin     | PRKCB  |
| SQ | Quercetin     | TOP2A  |
| SQ | Stigmasterol  | AR     |
| SQ | Stigmasterol  | ESR2   |
| SQ | Stigmasterol  | GABRA1 |
| SQ | Stigmasterol  | GABRA2 |
| SQ | Stigmasterol  | GABRA3 |
| SQ | Stigmasterol  | GABRA5 |
| SQ | Stigmasterol  | GABRA6 |
| SQ | Stigmasterol  | GABRE  |
| SQ | Stigmasterol  | GABRG3 |
| SQ | Stigmasterol  | NCOA2  |
| SQ | Stigmasterol  | NR1I2  |
| SQ | Stigmasterol  | NR1I3  |
| SQ | Stigmasterol  | PGR    |
| SQ | Stigmasterol  | PPARA  |
| SQ | Palmitic Acid | NCOA1  |
| SQ | Palmitic Acid | PPARA  |
| SQ | Palmitic Acid | PPARD  |
| SQ | Palmitic Acid | PPARG  |
| SQ | Palmitic Acid | PRKACA |
| SQ | Palmitic Acid | PTGS1  |
| SQ | Palmitic Acid | PTGS2  |
| SQ | Palmitic Acid | RXRA   |
| SQ | Palmitic Acid | RXRB   |
| SQ | Palmitic Acid | SCN5A  |
| SQ | Sitogluside   | TNF    |
| SQ | Enanthic Acid | NCOA1  |
| SQ | Enanthic Acid | PPARA  |
| SQ | Enanthic Acid | PPARD  |
| SQ | Enanthic Acid | PPARG  |
| SQ | Enanthic Acid | PRKACA |

|    |                                 |        |
|----|---------------------------------|--------|
| SQ | Enanthic Acid                   | PTGS1  |
| SQ | Enanthic Acid                   | PTGS2  |
| SQ | Enanthic Acid                   | RXRA   |
| SQ | Enanthic Acid                   | RXRB   |
| SQ | Enanthic Acid                   | SCN5A  |
| SQ | Nonanoic Acid                   | NCOA1  |
| SQ | Nonanoic Acid                   | PPARA  |
| SQ | Nonanoic Acid                   | PPARD  |
| SQ | Nonanoic Acid                   | PPARG  |
| SQ | Nonanoic Acid                   | PRKACA |
| SQ | Nonanoic Acid                   | PTGS1  |
| SQ | Nonanoic Acid                   | PTGS2  |
| SQ | Nonanoic Acid                   | RXRA   |
| SQ | Nonanoic Acid                   | RXRB   |
| SQ | Nonanoic Acid                   | SCN5A  |
| SQ | Heneicosanoic Acid              | NCOA1  |
| SQ | Heneicosanoic Acid              | PPARA  |
| SQ | Heneicosanoic Acid              | PPARD  |
| SQ | Heneicosanoic Acid              | PPARG  |
| SQ | Heneicosanoic Acid              | PRKACA |
| SQ | Heneicosanoic Acid              | PTGS1  |
| SQ | Heneicosanoic Acid              | PTGS2  |
| SQ | Heneicosanoic Acid              | RXRA   |
| SQ | Heneicosanoic Acid              | RXRB   |
| SQ | Heneicosanoic Acid              | SCN5A  |
| SQ | 2,6-Ditertbutyl-4-Methyl Phenol | GABRA1 |
| SQ | 2,6-Ditertbutyl-4-Methyl Phenol | GABRA2 |
| SQ | 2,6-Ditertbutyl-4-Methyl Phenol | GABRA3 |
| SQ | 2,6-Ditertbutyl-4-Methyl Phenol | GABRA5 |
| SQ | 2,6-Ditertbutyl-4-Methyl Phenol | GABRA6 |
| SQ | 2,6-Ditertbutyl-4-Methyl Phenol | GABRE  |
| SQ | 2,6-Ditertbutyl-4-Methyl Phenol | GABRG3 |
| SQ | Ginsenoside Rb1                 | IL1B   |
| SQ | Ginsenoside Rb1                 | IL6    |
| SQ | Ginsenoside Rb1                 | TNF    |
| SQ | Ginsenoside Rc                  | IL1B   |
| SQ | Ginsenoside Rc                  | IL6    |
| SQ | Ginsenoside Rc                  | TNF    |
| SQ | Ginsenoside Rg1                 | IL1B   |
| SQ | Ginsenoside Rg1                 | IL6    |
| SQ | Ginsenoside Rg1                 | TNF    |
| SQ | Ginsenoside-Rh1                 | IL1B   |
| SQ | Ginsenoside-Rh1                 | IL6    |
| SQ | Ginsenoside-Rh1                 | TNF    |
| SQ | Notoginsenoside R1              | IL1B   |
| SQ | Notoginsenoside R1              | IL6    |
| SQ | Notoginsenoside R1              | TNF    |
| SQ | Notoginsenoside R4              | IL1B   |
| SQ | Notoginsenoside R4              | IL6    |
| SQ | Notoginsenoside R4              | TNF    |

|    |                                                                                                                         |      |
|----|-------------------------------------------------------------------------------------------------------------------------|------|
| SQ | 3Î'-O-Î'-D-Glucopyranosyl-20-O-[Î'-L-Arabinopyranosyl(1â†'2)-Î'-D-Glucopyranosyl]3Î',12Î',20(S)-Trihydroxydammar-24-Ene | IL1B |
| SQ | 3Î'-O-Î'-D-Glucopyranosyl-20-O-[Î'-L-Arabinopyranosyl(1â†'2)-Î'-D-Glucopyranosyl]3Î',12Î',20(S)-Trihydroxydammar-24-Ene | IL6  |
| SQ | 3Î'-O-Î'-D-Glucopyranosyl-20-O-[Î'-L-Arabinopyranosyl(1â†'2)-Î'-D-Glucopyranosyl]3Î',12Î',20(S)-Trihydroxydammar-24-Ene | TNF  |
| SQ | 3-O-[Î'-D-Glucopyranosyl(1â†'6)-Î'-D-Glucopyranosyl]-20-O-Î'-D-Glucopyranosyl-3Î',12Î',20(S)-Trihydroxydammar-24-Ene    | IL1B |
| SQ | 3-O-[Î'-D-Glucopyranosyl(1â†'6)-Î'-D-Glucopyranosyl]-20-O-Î'-D-Glucopyranosyl-3Î',12Î',20(S)-Trihydroxydammar-24-Ene    | IL6  |
| SQ | 3-O-[Î'-D-Glucopyranosyl(1â†'6)-Î'-D-Glucopyranosyl]-20-O-Î'-D-Glucopyranosyl-3Î',12Î',20(S)-Trihydroxydammar-24-Ene    | TNF  |
| SQ | 6-O-Î'-D-Glucopyranosyl-20-O-Î'-D-Glucopyranosyl-3Î',6Î',12Î',20(S),25-Pentahydroxydammar-23-Ene                        | IL1B |
| SQ | 6-O-Î'-D-Glucopyranosyl-20-O-Î'-D-Glucopyranosyl-3Î',6Î',12Î',20(S),25-Pentahydroxydammar-23-Ene                        | IL6  |
| SQ | 6-O-Î'-D-Glucopyranosyl-20-O-Î'-D-Glucopyranosyl-3Î',6Î',12Î',20(S),25-Pentahydroxydammar-23-Ene                        | TNF  |
| SQ | Notoginsenoside A                                                                                                       | IL1B |
| SQ | Notoginsenoside A                                                                                                       | IL6  |
| SQ | Notoginsenoside A                                                                                                       | TNF  |
| SQ | Notoginsenoside B                                                                                                       | IL1B |
| SQ | Notoginsenoside B                                                                                                       | IL6  |
| SQ | Notoginsenoside B                                                                                                       | TNF  |
| SQ | Notoginsenoside C                                                                                                       | IL1B |
| SQ | Notoginsenoside C                                                                                                       | IL6  |
| SQ | Notoginsenoside C                                                                                                       | TNF  |
| SQ | Notoginsenoside D                                                                                                       | IL1B |
| SQ | Notoginsenoside D                                                                                                       | IL6  |
| SQ | Notoginsenoside D                                                                                                       | TNF  |
| SQ | Notoginsenoside G                                                                                                       | IL1B |
| SQ | Notoginsenoside G                                                                                                       | IL6  |
| SQ | Notoginsenoside G                                                                                                       | TNF  |
| SQ | Notoginsenoside H                                                                                                       | IL1B |
| SQ | Notoginsenoside H                                                                                                       | IL6  |
| SQ | Notoginsenoside H                                                                                                       | TNF  |
| SQ | Notoginsenoside I                                                                                                       | IL1B |
| SQ | Notoginsenoside I                                                                                                       | IL6  |
| SQ | Notoginsenoside I                                                                                                       | TNF  |
| SQ | Notoginsenoside L                                                                                                       | IL1B |



|    |                                                                                         |        |
|----|-----------------------------------------------------------------------------------------|--------|
| SQ | Notoginsenoside L                                                                       | IL6    |
| SQ | Notoginsenoside L                                                                       | TNF    |
| SQ | Notoginsenoside M                                                                       | IL1B   |
| SQ | Notoginsenoside M                                                                       | IL6    |
| SQ | Notoginsenoside M                                                                       | TNF    |
| SQ | Notoginsenoside N                                                                       | IL1B   |
| SQ | Notoginsenoside N                                                                       | IL6    |
| SQ | Notoginsenoside N                                                                       | TNF    |
| SQ | Notoginsenoside R2                                                                      | IL1B   |
| SQ | Notoginsenoside R2                                                                      | IL6    |
| SQ | Notoginsenoside R2                                                                      | TNF    |
| SQ | Notoginsenoside R3                                                                      | IL1B   |
| SQ | Notoginsenoside R3                                                                      | IL6    |
| SQ | Notoginsenoside R3                                                                      | TNF    |
| SQ | Notoginsenoside R6                                                                      | IL1B   |
| SQ | Notoginsenoside R6                                                                      | IL6    |
| SQ | Notoginsenoside R6                                                                      | TNF    |
| SQ | Quinquenoside I                                                                         | IL1B   |
| SQ | Quinquenoside I                                                                         | IL6    |
| SQ | Quinquenoside I                                                                         | TNF    |
| SQ | Quinquenoside Ii                                                                        | IL1B   |
| SQ | Quinquenoside Ii                                                                        | IL6    |
| SQ | Quinquenoside Ii                                                                        | TNF    |
| SQ | Quinquenoside Iii                                                                       | IL1B   |
| SQ | Quinquenoside Iii                                                                       | IL6    |
| SQ | Quinquenoside Iii                                                                       | TNF    |
| SQ | Quinquenoside Iv                                                                        | IL1B   |
| SQ | Quinquenoside Iv                                                                        | IL6    |
| SQ | Quinquenoside Iv                                                                        | TNF    |
| SQ | Quinquenoside V                                                                         | IL1B   |
| SQ | Quinquenoside V                                                                         | IL6    |
| SQ | Quinquenoside V                                                                         | TNF    |
| SQ | Sanchinoside B1                                                                         | IL1B   |
| SQ | Sanchinoside B1                                                                         | IL6    |
| SQ | Sanchinoside B1                                                                         | TNF    |
| SQ | 20-O-I'-D-Xylopyranosyl(1 $\hat{\dagger}$ '6)-I'-D-Glucopyranosyl-20(S)-Protopanaxadiol | IL1B   |
| SQ | 20-O-I'-D-Xylopyranosyl(1 $\hat{\dagger}$ '6)-I'-D-Glucopyranosyl-20(S)-Protopanaxadiol | IL6    |
| SQ | 20-O-I'-D-Xylopyranosyl(1 $\hat{\dagger}$ '6)-I'-D-Glucopyranosyl-20(S)-Protopanaxadiol | TNF    |
| DS | Clionasterol                                                                            | AR     |
| DS | Clionasterol                                                                            | ESR2   |
| DS | Clionasterol                                                                            | GABRA1 |
| DS | Clionasterol                                                                            | GABRA2 |
| DS | Clionasterol                                                                            | GABRA3 |
| DS | Clionasterol                                                                            | GABRA5 |
| DS | Clionasterol                                                                            | GABRA6 |
| DS | Clionasterol                                                                            | GABRE  |
| DS | Clionasterol                                                                            | GABRG3 |
| DS | Clionasterol                                                                            | NCOA2  |
| DS | Clionasterol                                                                            | NR1I2  |

|    |                                                                                                                                                                                                                                      |        |
|----|--------------------------------------------------------------------------------------------------------------------------------------------------------------------------------------------------------------------------------------|--------|
| DS | Clionasterol                                                                                                                                                                                                                         | NR1I3  |
| DS | Clionasterol                                                                                                                                                                                                                         | NR3C1  |
| DS | Clionasterol                                                                                                                                                                                                                         | NR3C2  |
| DS | Clionasterol                                                                                                                                                                                                                         | PGR    |
| DS | Clionasterol                                                                                                                                                                                                                         | PPARA  |
| DS | Stigmasterol                                                                                                                                                                                                                         | AR     |
| DS | Stigmasterol                                                                                                                                                                                                                         | ESR2   |
| DS | Stigmasterol                                                                                                                                                                                                                         | GABRA1 |
| DS | Stigmasterol                                                                                                                                                                                                                         | GABRA2 |
| DS | Stigmasterol                                                                                                                                                                                                                         | GABRA3 |
| DS | Stigmasterol                                                                                                                                                                                                                         | GABRA5 |
| DS | Stigmasterol                                                                                                                                                                                                                         | GABRA6 |
| DS | Stigmasterol                                                                                                                                                                                                                         | GABRE  |
| DS | Stigmasterol                                                                                                                                                                                                                         | GABRG3 |
| DS | Stigmasterol                                                                                                                                                                                                                         | NCOA2  |
| DS | Stigmasterol                                                                                                                                                                                                                         | NR1I2  |
| DS | Stigmasterol                                                                                                                                                                                                                         | NR1I3  |
| DS | Stigmasterol                                                                                                                                                                                                                         | NR3C1  |
| DS | Stigmasterol                                                                                                                                                                                                                         | NR3C2  |
| DS | Stigmasterol                                                                                                                                                                                                                         | PGR    |
| DS | Stigmasterol                                                                                                                                                                                                                         | PPARA  |
| DS | Oleanolic Acid                                                                                                                                                                                                                       | ADH1C  |
| DS | Oleanolic Acid                                                                                                                                                                                                                       | AR     |
| DS | Oleanolic Acid                                                                                                                                                                                                                       | ESR2   |
| DS | Oleanolic Acid                                                                                                                                                                                                                       | GABRA1 |
| DS | Oleanolic Acid                                                                                                                                                                                                                       | GABRA2 |
| DS | Oleanolic Acid                                                                                                                                                                                                                       | GABRA3 |
| DS | Oleanolic Acid                                                                                                                                                                                                                       | GABRA5 |
| DS | Oleanolic Acid                                                                                                                                                                                                                       | GABRA6 |
| DS | Oleanolic Acid                                                                                                                                                                                                                       | GABRE  |
| DS | Oleanolic Acid                                                                                                                                                                                                                       | GABRG3 |
| DS | Oleanolic Acid                                                                                                                                                                                                                       | GSTP1  |
| DS | Oleanolic Acid                                                                                                                                                                                                                       | NCOA2  |
| DS | Oleanolic Acid                                                                                                                                                                                                                       | NR1I2  |
| DS | Oleanolic Acid                                                                                                                                                                                                                       | NR1I3  |
| DS | Oleanolic Acid                                                                                                                                                                                                                       | NR3C1  |
| DS | Oleanolic Acid                                                                                                                                                                                                                       | NR3C2  |
| DS | Oleanolic Acid                                                                                                                                                                                                                       | PGR    |
| DS | Oleanolic Acid                                                                                                                                                                                                                       | PPARA  |
| DS | (2R,3R,4S,5S,6R)-2-[[[(8S,9S,10R,13R,14S)-1'-<br>[(2R,5R)-5-ethyl-6-methylheptan-2-yl]-10,13-<br>dimethyl-2,3,4,7,8,9,11,12,14,15,16,17-dodecahydro-<br>1H-cyclopenta[a]phenanthren-3-yl]oxy]-6-<br>(hydroxymethyl)oxane-3,4,5-triol | NR3C1  |
| DS | (2R,3R,4S,5S,6R)-2-[[[(8S,9S,10R,13R,14S)-1'-<br>[(2R,5R)-5-ethyl-6-methylheptan-2-yl]-10,13-<br>dimethyl-2,3,4,7,8,9,11,12,14,15,16,17-dodecahydro-<br>1H-cyclopenta[a]phenanthren-3-yl]oxy]-6-<br>(hydroxymethyl)oxane-3,4,5-triol | TNF    |
| DS | Succinic Acid                                                                                                                                                                                                                        | TYR    |
| DS | Sitogluside                                                                                                                                                                                                                          | NR3C1  |
| DS | Sitogluside                                                                                                                                                                                                                          | TNF    |

|    |                          |        |
|----|--------------------------|--------|
| DS | Ursolic Acid             | ADH1C  |
| DS | Ursolic Acid             | AR     |
| DS | Ursolic Acid             | ESR2   |
| DS | Ursolic Acid             | GABRA1 |
| DS | Ursolic Acid             | GABRA2 |
| DS | Ursolic Acid             | GABRA3 |
| DS | Ursolic Acid             | GABRA5 |
| DS | Ursolic Acid             | GABRA6 |
| DS | Ursolic Acid             | GABRE  |
| DS | Ursolic Acid             | GABRG3 |
| DS | Ursolic Acid             | GSTP1  |
| DS | Ursolic Acid             | NCOA2  |
| DS | Ursolic Acid             | NR1I2  |
| DS | Ursolic Acid             | NR1I3  |
| DS | Ursolic Acid             | NR3C1  |
| DS | Ursolic Acid             | NR3C2  |
| DS | Ursolic Acid             | PGR    |
| DS | Ursolic Acid             | PPARA  |
| DS | 3-O-Acetyloleanolic Acid | ALOX5  |
| DS | 3-O-Acetyloleanolic Acid | AR     |
| DS | 3-O-Acetyloleanolic Acid | NCOA1  |
| DS | 3-O-Acetyloleanolic Acid | NFKBIA |
| DS | 3-O-Acetyloleanolic Acid | NR1I2  |
| DS | 3-O-Acetyloleanolic Acid | NR3C1  |
| DS | 3-O-Acetyloleanolic Acid | NR3C2  |
| DS | 3-O-Acetyloleanolic Acid | PGR    |
| DS | 3-O-Acetyloleanolic Acid | PTGS1  |
| DS | 3-O-Acetyloleanolic Acid | TNF    |
| DS | Tanshinaldehyde          | PIK3CG |
| DS | Paramiltioic Acid        | NR3C1  |
| DS | Ferruginol               | ALOX5  |
| DS | Ferruginol               | NR1I2  |
| DS | Ferruginol               | PRKCA  |
| DS | Ferruginol               | PRKCB  |
| DS | Sugiol                   | ALOX5  |
| DS | Sugiol                   | AR     |
| DS | Sugiol                   | ESR2   |
| DS | Sugiol                   | NR1I2  |
| DS | Sugiol                   | PRKCA  |
| DS | Sugiol                   | PRKCB  |
| DS | Tigogenin                | AR     |
| DS | Baicalin                 | AHR    |
| DS | Baicalin                 | AKT1   |
| DS | Baicalin                 | CA2    |
| DS | Baicalin                 | ESR2   |
| DS | Baicalin                 | GABRA1 |
| DS | Baicalin                 | GABRA2 |
| DS | Baicalin                 | GABRA3 |
| DS | Baicalin                 | GABRA5 |
| DS | Baicalin                 | GABRA6 |
| DS | Baicalin                 | GABRG3 |
| DS | Baicalin                 | NCOA1  |

|    |                                                       |        |
|----|-------------------------------------------------------|--------|
| DS | Baicalin                                              | NCOA2  |
| DS | Baicalin                                              | NR1I2  |
| DS | Baicalin                                              | PIK3CG |
| DS | Baicalin                                              | PIM1   |
| DS | Baicalin                                              | PRKACA |
| DS | Baicalin                                              | PRKCA  |
| DS | Baicalin                                              | PRKCB  |
| DS | Baicalin                                              | TOP2A  |
| DS | Danshenol B                                           | NR3C1  |
| DS | 2-Isopropyl-8-Methylphenanthrene-3,4-Dione(R0-090680) | F10    |
| DS | 2-Isopropyl-8-Methylphenanthrene-3,4-Dione(R0-090680) | F2     |
| DS | 2-Isopropyl-8-Methylphenanthrene-3,4-Dione(R0-090680) | F7     |
| DS | 2-Isopropyl-8-Methylphenanthrene-3,4-Dione(R0-090680) | NQO1   |
| DS | Miltionone Ii                                         | NR3C1  |
| DS | Miltipolone                                           | ALOX5  |
| DS | Miltipolone                                           | NR1I2  |
| DS | Miltipolone                                           | PRKCA  |
| DS | Miltipolone                                           | PRKCB  |
| DS | Neocryptotanshinone Ii                                | ALOX5  |
| DS | Neocryptotanshinone Ii                                | NR1I2  |
| DS | Neocryptotanshinone Ii                                | PTGS1  |
| DS | Oleoyl Danshenxinkun A                                | NR3C1  |
| DS | Oleoyl Neocryptotanshinone                            | IL1B   |
| DS | Oleoyl Neocryptotanshinone                            | NR3C1  |
| DS | Oleoyl Neocryptotanshinone                            | NR3C2  |
| DS | Rosmarinic Acid Methyl Ester                          | GSTP1  |
| DS | Rosmarinic Acid Methyl Ester                          | PPARG  |
| DS | Salviol                                               | ALOX5  |
| DS | Salviol                                               | ESR2   |
| DS | Salviol                                               | NCOA2  |
| DS | Salviol                                               | NR1I2  |
| DS | Salviol                                               | PRKCA  |
| DS | Salviol                                               | PRKCB  |
| HH | Clionasterol                                          | AR     |
| HH | Clionasterol                                          | ESR2   |
| HH | Clionasterol                                          | GABRA1 |
| HH | Clionasterol                                          | GABRA2 |
| HH | Clionasterol                                          | GABRA3 |
| HH | Clionasterol                                          | GABRA5 |
| HH | Clionasterol                                          | GABRA6 |
| HH | Clionasterol                                          | GABRE  |
| HH | Clionasterol                                          | GABRG3 |
| HH | Clionasterol                                          | NCOA2  |
| HH | Clionasterol                                          | NR1I2  |
| HH | Clionasterol                                          | NR1I3  |
| HH | Clionasterol                                          | NR3C1  |
| HH | Clionasterol                                          | NR3C2  |
| HH | Clionasterol                                          | PGR    |

|    |                |        |
|----|----------------|--------|
| HH | Clionasterol   | PPARA  |
| HH | Linoleic Acid  | NCOA1  |
| HH | Linoleic Acid  | PPARA  |
| HH | Linoleic Acid  | PPARD  |
| HH | Linoleic Acid  | PPARG  |
| HH | Linoleic Acid  | PRKACA |
| HH | Linoleic Acid  | PTGS1  |
| HH | Linoleic Acid  | PTGS2  |
| HH | Linoleic Acid  | RXRA   |
| HH | Linoleic Acid  | RXRB   |
| HH | Arachidic Acid | NCOA1  |
| HH | Arachidic Acid | PPARA  |
| HH | Arachidic Acid | PPARD  |
| HH | Arachidic Acid | PPARG  |
| HH | Arachidic Acid | PRKACA |
| HH | Arachidic Acid | PTGS1  |
| HH | Arachidic Acid | PTGS2  |
| HH | Arachidic Acid | RXRA   |
| HH | Arachidic Acid | RXRB   |
| HH | Arachidic Acid | SCN5A  |
| HH | Palmitic Acid  | NCOA1  |
| HH | Palmitic Acid  | PPARA  |
| HH | Palmitic Acid  | PPARD  |
| HH | Palmitic Acid  | PPARG  |
| HH | Palmitic Acid  | PRKACA |
| HH | Palmitic Acid  | PTGS1  |
| HH | Palmitic Acid  | PTGS2  |
| HH | Palmitic Acid  | RXRA   |
| HH | Palmitic Acid  | RXRB   |
| HH | Palmitic Acid  | SCN5A  |
| HH | Lauric Acid    | NCOA1  |
| HH | Lauric Acid    | PPARA  |
| HH | Lauric Acid    | PPARD  |
| HH | Lauric Acid    | PPARG  |
| HH | Lauric Acid    | PRKACA |
| HH | Lauric Acid    | PTGS1  |
| HH | Lauric Acid    | PTGS2  |
| HH | Lauric Acid    | RXRA   |
| HH | Lauric Acid    | RXRB   |
| HH | Lauric Acid    | SCN5A  |
| HH | Myristic Acid  | NCOA1  |
| HH | Myristic Acid  | PPARA  |
| HH | Myristic Acid  | PPARD  |
| HH | Myristic Acid  | PPARG  |
| HH | Myristic Acid  | PRKACA |
| HH | Myristic Acid  | PTGS1  |
| HH | Myristic Acid  | PTGS2  |
| HH | Myristic Acid  | RXRA   |
| HH | Myristic Acid  | RXRB   |
| HH | Myristic Acid  | SCN5A  |
| HH | Stearic Acid   | NCOA1  |
| HH | Stearic Acid   | PPARA  |

|    |                                       |        |
|----|---------------------------------------|--------|
| HH | Stearic Acid                          | PPARD  |
| HH | Stearic Acid                          | PPARG  |
| HH | Stearic Acid                          | PRKACA |
| HH | Stearic Acid                          | PTGS1  |
| HH | Stearic Acid                          | PTGS2  |
| HH | Stearic Acid                          | RXRA   |
| HH | Stearic Acid                          | RXRB   |
| HH | Stearic Acid                          | SCN5A  |
| HH | Carthamidin                           | AHR    |
| HH | Carthamidin                           | AKT1   |
| HH | Carthamidin                           | ESR2   |
| HH | Carthamidin                           | NCOA1  |
| HH | Carthamidin                           | NCOA2  |
| HH | Carthamidin                           | NR1I2  |
| HH | Carthamidin                           | PIK3CG |
| HH | Carthamidin                           | PIM1   |
| HH | Carthamidin                           | TOP2A  |
| HH | Carthamin                             | AR     |
| HH | Carthamin                             | TYR    |
| HH | Carthamone                            | AR     |
| HH | Clerosterol                           | AR     |
| HH | Clerosterol                           | ESR2   |
| HH | Clerosterol                           | GABRA1 |
| HH | Clerosterol                           | GABRA2 |
| HH | Clerosterol                           | GABRA3 |
| HH | Clerosterol                           | GABRA5 |
| HH | Clerosterol                           | GABRA6 |
| HH | Clerosterol                           | GABRE  |
| HH | Clerosterol                           | GABRG3 |
| HH | Clerosterol                           | NCOA2  |
| HH | Clerosterol                           | NR1I2  |
| HH | Clerosterol                           | NR1I3  |
| HH | Clerosterol                           | NR3C1  |
| HH | Clerosterol                           | NR3C2  |
| HH | Clerosterol                           | PGR    |
| HH | Clerosterol                           | PPARA  |
| HH | Dehydrosafynol                        | LYZ    |
| HH | 15I',20I'-Dihydroxy-I'4-Pregnen-3-One | ADH1C  |
| HH | 15I',20I'-Dihydroxy-I'4-Pregnen-3-One | AR     |
| HH | 15I',20I'-Dihydroxy-I'4-Pregnen-3-One | ESR2   |
| HH | 15I',20I'-Dihydroxy-I'4-Pregnen-3-One | GABRA1 |
| HH | 15I',20I'-Dihydroxy-I'4-Pregnen-3-One | GABRA2 |
| HH | 15I',20I'-Dihydroxy-I'4-Pregnen-3-One | GABRA3 |
| HH | 15I',20I'-Dihydroxy-I'4-Pregnen-3-One | GABRA5 |
| HH | 15I',20I'-Dihydroxy-I'4-Pregnen-3-One | GABRA6 |
| HH | 15I',20I'-Dihydroxy-I'4-Pregnen-3-One | GABRE  |
| HH | 15I',20I'-Dihydroxy-I'4-Pregnen-3-One | GABRG3 |
| HH | 15I',20I'-Dihydroxy-I'4-Pregnen-3-One | GSTP1  |
| HH | 15I',20I'-Dihydroxy-I'4-Pregnen-3-One | NCOA1  |
| HH | 15I',20I'-Dihydroxy-I'4-Pregnen-3-One | NCOA2  |
| HH | 15I',20I'-Dihydroxy-I'4-Pregnen-3-One | NR1I2  |
| HH | 15I',20I'-Dihydroxy-I'4-Pregnen-3-One | NR1I3  |

|    |                                                                         |        |
|----|-------------------------------------------------------------------------|--------|
| HH | 15 $\beta$ ,20 $\beta$ -Dihydroxy-1 $\alpha$ -Pregnen-3-One             | NR3C1  |
| HH | 15 $\beta$ ,20 $\beta$ -Dihydroxy-1 $\alpha$ -Pregnen-3-One             | NR3C2  |
| HH | 15 $\beta$ ,20 $\beta$ -Dihydroxy-1 $\alpha$ -Pregnen-3-One             | PGR    |
| HH | 15 $\beta$ ,20 $\beta$ -Dihydroxy-1 $\alpha$ -Pregnen-3-One             | PPARA  |
| HH | 6-Hydroxykaempferol-7-O-Glucoside                                       | AHR    |
| HH | 6-Hydroxykaempferol-7-O-Glucoside                                       | AKR1C3 |
| HH | 6-Hydroxykaempferol-7-O-Glucoside                                       | AR     |
| HH | 6-Hydroxykaempferol-7-O-Glucoside                                       | TYR    |
| HH | Neocarthamin                                                            | AHR    |
| HH | Neocarthamin                                                            | AKR1C3 |
| HH | Neocarthamin                                                            | AR     |
| HH | Neocarthamin                                                            | TYR    |
| HH | Onjixanthone I                                                          | GABRA1 |
| HH | Onjixanthone I                                                          | GABRA2 |
| HH | Onjixanthone I                                                          | GABRA3 |
| HH | Onjixanthone I                                                          | GABRA5 |
| HH | Onjixanthone I                                                          | GABRA6 |
| HH | Onjixanthone I                                                          | GABRG3 |
| HH | Onjixanthone li                                                         | AHR    |
| HH | Onjixanthone li                                                         | AKT1   |
| HH | Onjixanthone li                                                         | ESR2   |
| HH | Onjixanthone li                                                         | GABRA1 |
| HH | Onjixanthone li                                                         | GABRA2 |
| HH | Onjixanthone li                                                         | GABRA3 |
| HH | Onjixanthone li                                                         | GABRA5 |
| HH | Onjixanthone li                                                         | GABRA6 |
| HH | Onjixanthone li                                                         | GABRG3 |
| HH | Onjixanthone li                                                         | NCOA1  |
| HH | Onjixanthone li                                                         | NCOA2  |
| HH | Onjixanthone li                                                         | NR1I2  |
| HH | Onjixanthone li                                                         | PIK3CG |
| HH | Onjixanthone li                                                         | PIM1   |
| HH | Onjixanthone li                                                         | TOP2A  |
| HH | Propanetriol-1'-L-Arabinofuranosyl (1 $\alpha$ '4)-1'-D-Glucopyranoside | LYZ    |
| HH | Propanetriol-1'-L-Arabinofuranosyl (1 $\alpha$ '4)-1'-D-Glucopyranoside | PTGS1  |
| HH | Safynol                                                                 | LYZ    |
| HQ | Clionasterol                                                            | AR     |
| HQ | Clionasterol                                                            | ESR2   |
| HQ | Clionasterol                                                            | GABRA1 |
| HQ | Clionasterol                                                            | GABRA2 |
| HQ | Clionasterol                                                            | GABRA3 |
| HQ | Clionasterol                                                            | GABRA5 |
| HQ | Clionasterol                                                            | GABRA6 |
| HQ | Clionasterol                                                            | GABRE  |
| HQ | Clionasterol                                                            | GABRG3 |
| HQ | Clionasterol                                                            | NCOA2  |
| HQ | Clionasterol                                                            | NR1I2  |
| HQ | Clionasterol                                                            | NR1I3  |
| HQ | Clionasterol                                                            | NR3C1  |
| HQ | Clionasterol                                                            | NR3C2  |

|    |                                                          |        |
|----|----------------------------------------------------------|--------|
| HQ | Clionasterol                                             | PGR    |
| HQ | Clionasterol                                             | PPARA  |
| HQ | Palmitic Acid                                            | NCOA1  |
| HQ | Palmitic Acid                                            | PPARA  |
| HQ | Palmitic Acid                                            | PPARD  |
| HQ | Palmitic Acid                                            | PPARG  |
| HQ | Palmitic Acid                                            | PRKACA |
| HQ | Palmitic Acid                                            | PTGS1  |
| HQ | Palmitic Acid                                            | PTGS2  |
| HQ | Palmitic Acid                                            | RXRA   |
| HQ | Palmitic Acid                                            | RXRB   |
| HQ | Palmitic Acid                                            | SCN5A  |
| HQ | Sucrose                                                  | LYZ    |
| HQ | Sucrose                                                  | PTGS1  |
| HQ | Choline                                                  | ACHE   |
| HQ | Kumatakenin                                              | AHR    |
| HQ | Kumatakenin                                              | AKT1   |
| HQ | Kumatakenin                                              | ESR2   |
| HQ | Kumatakenin                                              | GABRA1 |
| HQ | Kumatakenin                                              | GABRA2 |
| HQ | Kumatakenin                                              | GABRA3 |
| HQ | Kumatakenin                                              | GABRA5 |
| HQ | Kumatakenin                                              | GABRA6 |
| HQ | Kumatakenin                                              | GABRG3 |
| HQ | Kumatakenin                                              | NCOA1  |
| HQ | Kumatakenin                                              | NCOA2  |
| HQ | Kumatakenin                                              | NR1I2  |
| HQ | Kumatakenin                                              | PIK3CG |
| HQ | Kumatakenin                                              | PIM1   |
| HQ | Kumatakenin                                              | TOP2A  |
| HQ | I'etaine                                                 | BCL2   |
| HQ | I'etaine                                                 | CHRM3  |
| HQ | I'etaine                                                 | MPO    |
| HQ | I'etaine                                                 | XDH    |
| HQ | Astragaloside Viii                                       | IL1B   |
| HQ | Astragaloside Viii                                       | IL6    |
| HQ | Astragaloside Viii                                       | NR3C1  |
| HQ | Astragaloside Viii                                       | TNF    |
| HQ | Glucuronic Acid                                          | ACHE   |
| HQ | 2'-Hydroxy-3',4'-Dimethoxy-Isoflavane-7-O-I'-D-Glucoside | AHR    |
| HQ | 2'-Hydroxy-3',4'-Dimethoxy-Isoflavane-7-O-I'-D-Glucoside | AKR1C3 |
| HQ | 2'-Hydroxy-3',4'-Dimethoxy-Isoflavane-7-O-I'-D-Glucoside | AR     |
| NX | Oleanolic Acid                                           | ADH1C  |
| NX | Oleanolic Acid                                           | AR     |
| NX | Oleanolic Acid                                           | ESR2   |
| NX | Oleanolic Acid                                           | GABRA1 |
| NX | Oleanolic Acid                                           | GABRA2 |
| NX | Oleanolic Acid                                           | GABRA3 |
| NX | Oleanolic Acid                                           | GABRA5 |



|    |                            |        |
|----|----------------------------|--------|
| NX | Oleanolic Acid             | GABRA6 |
| NX | Oleanolic Acid             | GABRE  |
| NX | Oleanolic Acid             | GABRG3 |
| NX | Oleanolic Acid             | GSTP1  |
| NX | Î'-Spinasterol             | AR     |
| NX | Î'-Spinasterol             | ESR2   |
| NX | Î'-Spinasterol             | GABRA1 |
| NX | Î'-Spinasterol             | GABRA2 |
| NX | Î'-Spinasterol             | GABRA3 |
| NX | Î'-Spinasterol             | GABRA5 |
| NX | Î'-Spinasterol             | GABRA6 |
| NX | Î'-Spinasterol             | GABRE  |
| NX | Î'-Spinasterol             | GABRG3 |
| NX | 20-Hydroxyecdysone         | ADH1C  |
| NX | 20-Hydroxyecdysone         | AR     |
| NX | 20-Hydroxyecdysone         | GSTP1  |
| NX | Chrysophanol               | AHR    |
| NX | Chrysophanol               | ALOX5  |
| NX | Chrysophanol               | CYP1A2 |
| NX | Chrysophanol               | CYP3A4 |
| NX | Chrysophanol               | GSTP1  |
| NX | Achyranthoside I           | IL1B   |
| NX | Achyranthoside I           | IL6    |
| NX | Bidentatoside I            | IL1B   |
| NX | Bidentatoside I            | IL6    |
| NX | Bidentatoside Ii           | IL1B   |
| NX | Bidentatoside Ii           | IL6    |
| NX | Inokosterone,Isoquercitrin | AR     |
| NX | Inokosterone               | AR     |
| NX | (25S)-Inokosterone         | AR     |
| NX | Rubrosterone               | AR     |
| NX | Rubrosterone               | ESR2   |
| NX | Rubrosterone               | GABRA1 |
| NX | Rubrosterone               | GABRA2 |
| NX | Rubrosterone               | GABRA3 |
| NX | Rubrosterone               | GABRA5 |
| NX | Rubrosterone               | GABRA6 |
| NX | Rubrosterone               | GABRE  |
| NX | Rubrosterone               | GABRG3 |
| NX | Oleanolic Acid             | NCOA2  |
| NX | Oleanolic Acid             | NR1I2  |
| NX | Oleanolic Acid             | NR1I3  |
| NX | Oleanolic Acid             | NR3C1  |
| NX | Oleanolic Acid             | NR3C2  |
| NX | Oleanolic Acid             | PGR    |
| NX | Oleanolic Acid             | PPARA  |
| NX | Î'-Spinasterol             | NCOA2  |
| NX | Î'-Spinasterol             | NR1I2  |
| NX | Î'-Spinasterol             | NR1I3  |
| NX | Î'-Spinasterol             | NR3C1  |
| NX | Î'-Spinasterol             | NR3C2  |
| NX | Î'-Spinasterol             | PGR    |

|    |                                   |        |
|----|-----------------------------------|--------|
| NX | Î'-Spinasterol                    | PPARA  |
| NX | Î'-Spinasterol                    | RXRA   |
| NX | 20-Hydroxyecdysone                | NCOA1  |
| NX | 20-Hydroxyecdysone                | NCOA2  |
| NX | 20-Hydroxyecdysone                | NR1I2  |
| NX | 20-Hydroxyecdysone                | NR1I3  |
| NX | 20-Hydroxyecdysone                | NR3C1  |
| NX | 20-Hydroxyecdysone                | NR3C2  |
| NX | 20-Hydroxyecdysone                | PGR    |
| NX | Î'-Spinasterol-Î'-D-Glucoside     | NR3C1  |
| NX | Î'-Spinasterol-Î'-D-Glucoside     | TNF    |
| NX | Achyranthoside I                  | NR3C1  |
| NX | Achyranthoside I                  | TNF    |
| NX | Achyranthoside Ii                 | NR3C1  |
| NX | Achyranthoside Ii                 | TNF    |
| NX | Bidentatoside I                   | NR3C1  |
| NX | Bidentatoside I                   | TNF    |
| NX | Bidentatoside Ii                  | NR3C1  |
| NX | Bidentatoside Ii                  | TNF    |
| NX | Chikusetsu Saponin V Methyl Ester | NR3C1  |
| NX | Chikusetsu Saponin V Methyl Ester | TNF    |
| NX | Inokosterone,Isoquercitrin        | NCOA1  |
| NX | Inokosterone,Isoquercitrin        | NOS2   |
| NX | Inokosterone,Isoquercitrin        | NR1I2  |
| NX | Inokosterone,Isoquercitrin        | NR3C1  |
| NX | Inokosterone,Isoquercitrin        | NR3C2  |
| NX | Inokosterone,Isoquercitrin        | PGR    |
| NX | Inokosterone                      | NCOA1  |
| NX | Inokosterone                      | NOS2   |
| NX | Inokosterone                      | NR1I2  |
| NX | Inokosterone                      | NR3C1  |
| NX | Inokosterone                      | NR3C2  |
| NX | Inokosterone                      | PGR    |
| NX | (25S)-Inokosterone                | NCOA1  |
| NX | (25S)-Inokosterone                | NOS2   |
| NX | (25S)-Inokosterone                | NR1I2  |
| NX | (25S)-Inokosterone                | NR3C1  |
| NX | (25S)-Inokosterone                | NR3C2  |
| NX | (25S)-Inokosterone                | PGR    |
| NX | Rubrosterone                      | NCOA1  |
| NX | Rubrosterone                      | NCOA2  |
| NX | Rubrosterone                      | NR1I2  |
| NX | Rubrosterone                      | NR1I3  |
| NX | Rubrosterone                      | NR3C1  |
| NX | Rubrosterone                      | NR3C2  |
| NX | Rubrosterone                      | PGR    |
| NX | Rubrosterone                      | PPARA  |
| DG | Scopoletin                        | GABRA1 |
| DG | Scopoletin                        | GABRA2 |
| DG | Scopoletin                        | GABRA3 |
| DG | Scopoletin                        | GABRA5 |
| DG | Scopoletin                        | GABRA6 |

|    |               |        |
|----|---------------|--------|
| DG | Scopoletin    | GABRG3 |
| DG | Carvacrol     | GABRA1 |
| DG | Carvacrol     | GABRA2 |
| DG | Carvacrol     | GABRA3 |
| DG | Carvacrol     | GABRA5 |
| DG | Carvacrol     | GABRA6 |
| DG | Carvacrol     | GABRE  |
| DG | Carvacrol     | GABRG3 |
| DG | Stigmasterol  | AR     |
| DG | Stigmasterol  | ESR2   |
| DG | Stigmasterol  | GABRA1 |
| DG | Stigmasterol  | GABRA2 |
| DG | Stigmasterol  | GABRA3 |
| DG | Stigmasterol  | GABRA5 |
| DG | Stigmasterol  | GABRA6 |
| DG | Stigmasterol  | GABRE  |
| DG | Stigmasterol  | GABRG3 |
| DG | Stigmasterol  | NCOA2  |
| DG | Stigmasterol  | NR1I2  |
| DG | Stigmasterol  | NR1I3  |
| DG | Stigmasterol  | NR3C1  |
| DG | Stigmasterol  | NR3C2  |
| DG | Stigmasterol  | PGR    |
| DG | Stigmasterol  | PPARA  |
| DG | Vanillin      | AR     |
| DG | Vanillin      | ESR2   |
| DG | Vanillin      | PGR    |
| DG | Anisic Acid   | PPARA  |
| DG | Anisic Acid   | PPARG  |
| DG | Anisic Acid   | PTGS1  |
| DG | Anisic Acid   | PTGS2  |
| DG | Palmitic Acid | NCOA1  |
| DG | Palmitic Acid | PPARA  |
| DG | Palmitic Acid | PPARD  |
| DG | Palmitic Acid | PPARG  |
| DG | Palmitic Acid | PRKACA |
| DG | Palmitic Acid | PTGS1  |
| DG | Palmitic Acid | PTGS2  |
| DG | Palmitic Acid | RXRA   |
| DG | Palmitic Acid | RXRB   |
| DG | Palmitic Acid | SCN5A  |
| DG | Myristic Acid | NCOA1  |
| DG | Myristic Acid | PPARA  |
| DG | Myristic Acid | PPARD  |
| DG | Myristic Acid | PPARG  |
| DG | Myristic Acid | PRKACA |
| DG | Myristic Acid | PTGS1  |
| DG | Myristic Acid | PTGS2  |
| DG | Myristic Acid | RXRA   |
| DG | Myristic Acid | RXRB   |
| DG | Myristic Acid | SCN5A  |
| DG | Succinic Acid | TYR    |

|    |                                                    |        |
|----|----------------------------------------------------|--------|
| DG | Uracil                                             | XDH    |
| DG | Phenol                                             | TYR    |
| DG | Choline                                            | ACHE   |
| DG | Sebacic Acid                                       | TYR    |
| DG | Lignoceric Acid                                    | NCOA1  |
| DG | Lignoceric Acid                                    | PPARA  |
| DG | Lignoceric Acid                                    | PPARD  |
| DG | Lignoceric Acid                                    | PPARG  |
| DG | Lignoceric Acid                                    | PRKACA |
| DG | Lignoceric Acid                                    | PTGS1  |
| DG | Lignoceric Acid                                    | PTGS2  |
| DG | Lignoceric Acid                                    | RXRA   |
| DG | Lignoceric Acid                                    | RXRB   |
| DG | Lignoceric Acid                                    | SCN5A  |
| DG | 5-Hydroxycoumarin,Guaiacol                         | AR     |
| DG | 5-Hydroxycoumarin,Guaiacol                         | ESR2   |
| DG | Azelaic Acid                                       | TYR    |
| DG | O-Cresol                                           | GABRA1 |
| DG | O-Cresol                                           | GABRA2 |
| DG | O-Cresol                                           | GABRA3 |
| DG | O-Cresol                                           | GABRA5 |
| DG | O-Cresol                                           | GABRA6 |
| DG | O-Cresol                                           | GABRE  |
| DG | O-Cresol                                           | GABRG3 |
| DG | 2,3-Dicresol                                       | GABRA1 |
| DG | 2,3-Dicresol                                       | GABRA2 |
| DG | 2,3-Dicresol                                       | GABRA3 |
| DG | 2,3-Dicresol                                       | GABRA5 |
| DG | 2,3-Dicresol                                       | GABRA6 |
| DG | 2,3-Dicresol                                       | GABRE  |
| DG | 2,3-Dicresol                                       | GABRG3 |
| DG | 2',4'-Dihydroxyacetophenone                        | PTGS1  |
| DG | 2',4'-Dihydroxyacetophenone                        | PTGS2  |
| DG | Isoeugenol                                         | AR     |
| DG | Isoeugenol                                         | ESR2   |
| DG | Stigmasterol-1'-D-Glucoside                        | NR3C1  |
| DG | Stigmasterol-1'-D-Glucoside                        | TNF    |
| DG | 1,1,5-Trimethyl-2-Formyl-Cyclohexa-2,5-Diene-4-One | NQO1   |

| TCMSP |             |        |
|-------|-------------|--------|
| DH    | aloe-emodin | PTGS1  |
| DH    | aloe-emodin | PTGS2  |
| DH    | aloe-emodin | PIK3CG |
| DH    | aloe-emodin | PRKACA |
| DH    | aloe-emodin | NCOA2  |
| DH    | aloe-emodin | AR     |
| DH    | aloe-emodin | TNF    |
| DH    | aloe-emodin | PRKCA  |
| DH    | aloe-emodin | IL1B   |
| DH    | EUPATIN     | NOS2   |
| DH    | EUPATIN     | AR     |

|    |                                                                     |        |
|----|---------------------------------------------------------------------|--------|
| DH | EUPATIN                                                             | F10    |
| DH | EUPATIN                                                             | PTGS2  |
| DH | EUPATIN                                                             | F7     |
| DH | EUPATIN                                                             | ESR2   |
| DH | EUPATIN                                                             | NCOA2  |
| DH | EUPATIN                                                             | F2     |
| DH | EUPATIN                                                             | SCN5A  |
| DH | (-)-catechin                                                        | PTGS1  |
| DH | (-)-catechin                                                        | PTGS2  |
| DH | (-)-catechin                                                        | PRKACA |
| DH | (-)-catechin                                                        | NCOA2  |
| DH | (-)-catechin                                                        | PPARG  |
| DH | rhein                                                               | PTGS1  |
| DH | rhein                                                               | PTGS2  |
| DH | rhein                                                               | PIK3CG |
| DH | rhein                                                               | NCOA2  |
| DH | rhein                                                               | AR     |
| DH | Toralactone                                                         | NOS2   |
| DH | Toralactone                                                         | PTGS1  |
| DH | Toralactone                                                         | PTGS2  |
| DH | Toralactone                                                         | ESR2   |
| DH | Toralactone                                                         | PIK3CG |
| DH | Toralactone                                                         | PRKACA |
| DH | beta-sitosterol                                                     | PGR    |
| DH | beta-sitosterol                                                     | NCOA2  |
| DH | beta-sitosterol                                                     | PTGS1  |
| DH | beta-sitosterol                                                     | PTGS2  |
| DH | beta-sitosterol                                                     | PIK3CG |
| DH | beta-sitosterol                                                     | PRKACA |
| DH | beta-sitosterol                                                     | CHRM3  |
| DH | beta-sitosterol                                                     | SCN5A  |
| DH | beta-sitosterol                                                     | GABRA2 |
| DH | beta-sitosterol                                                     | GABRA5 |
| DH | beta-sitosterol                                                     | GABRA3 |
| DH | beta-sitosterol                                                     | GABRA1 |
| DH | beta-sitosterol                                                     | BCL2   |
| DH | beta-sitosterol                                                     | PRKCA  |
| DH | Daucosterol qt                                                      | PGR    |
| DH | Daucosterol qt                                                      | NCOA2  |
| DS | sugiol                                                              | ACHE   |
| DS | Dehydrotanshinone II A                                              | AR     |
| DS | Dehydrotanshinone II A                                              | ACHE   |
| DS | digallate                                                           | AR     |
| DS | luteolin                                                            | AR     |
| DS | luteolin                                                            | AKT1   |
| DS | 5,6-dihydroxy-7-isopropyl-1,1-dimethyl-2,3-dihydrophenanthren-4-one | ACHE   |
| DS | 2-isopropyl-8-methylphenanthrene-3,4-dione                          | AR     |
| DS | 3 $\alpha$ -hydroxytanshinoneIIa                                    | ACHE   |
| DS | 4-methylenemiltirone                                                | AR     |

|    |                                                                                          |        |
|----|------------------------------------------------------------------------------------------|--------|
| DS | 2-(4-hydroxy-3-methoxyphenyl)-5-(3-hydroxypropyl)-7-methoxy-3-benzofurancarboxaldehyde   | AR     |
| DS | formyltanshinone                                                                         | AR     |
| DS | 3-beta-Hydroxymethylenetanshinone                                                        | ACHE   |
| DS | Methylenetanshinone                                                                      | ACHE   |
| DS | przewaquinone c                                                                          | ACHE   |
| DS | (6S,7R)-6,7-dihydroxy-1,6-dimethyl-8,9-dihydro-7H-naphtho[8,7-g]benzofuran-10,11-dione   | ACHE   |
| DS | tanshinaldehyde                                                                          | ACHE   |
| DS | Salvilenone                                                                              | AR     |
| DS | dan-shexinkum d                                                                          | AR     |
| DS | dan-shexinkum d                                                                          | ACHE   |
| DS | danshenspiroketallactone                                                                 | ACHE   |
| DS | deoxyneocryptotanshinone                                                                 | AR     |
| DS | dihydrotanshinolactone                                                                   | AR     |
| DS | dihydrotanshinolactone                                                                   | ACHE   |
| DS | C09092                                                                                   | ACHE   |
| DS | isocryptotanshinone                                                                      | AR     |
| DS | isocryptotanshinone                                                                      | ACHE   |
| DS | Isotanshinone II                                                                         | AR     |
| DS | Isotanshinone II                                                                         | ACHE   |
| DS | miltionone I                                                                             | AR     |
| DS | miltionone II                                                                            | ACHE   |
| DS | miltipolone                                                                              | ACHE   |
| DS | Miltirone                                                                                | AR     |
| DS | neocryptotanshinone ii                                                                   | AR     |
| DS | 1-methyl-8,9-dihydro-7H-naphtho[5,6-g]benzofuran-6,10,11-trione                          | ACHE   |
| DS | prolithospermic acid                                                                     | AR     |
| DS | (2R)-3-(3,4-dihydroxyphenyl)-2-[(Z)-3-(3,4-dihydroxyphenyl)acryloyl]oxy-propionic acid   | AR     |
| DS | salvilenone I                                                                            | ACHE   |
| DS | salviolone                                                                               | ACHE   |
| DS | (6S)-6-hydroxy-1-methyl-6-methylol-8,9-dihydro-7H-naphtho[8,7-g]benzofuran-10,11-quinone | ACHE   |
| DS | Tanshindiol B                                                                            | ACHE   |
| DS | Przewaquinone E                                                                          | ACHE   |
| DS | tanshinone iia                                                                           | ACHE   |
| DS | (6S)-6-(hydroxymethyl)-1,6-dimethyl-8,9-dihydro-7H-naphtho[8,7-g]benzofuran-10,11-dione  | ACHE   |
| DS | tanshinone VI                                                                            | AR     |
| DS | 1,2,5,6-tetrahydrotanshinone                                                             | CHRM3  |
| DS | 1,2,5,6-tetrahydrotanshinone                                                             | CA2    |
| DS | 1,2,5,6-tetrahydrotanshinone                                                             | GABRA1 |
| DS | sugiol                                                                                   | CHRM3  |
| DS | sugiol                                                                                   | CA2    |
| DS | Dehydrotanshinone II A                                                                   | CHRM3  |
| DS | Dehydrotanshinone II A                                                                   | F2     |
| DS | Dehydrotanshinone II A                                                                   | GABRA1 |
| DS | Baicalin                                                                                 | F10    |
| DS | luteolin                                                                                 | BCL2L1 |

|    |                                                                                        |        |
|----|----------------------------------------------------------------------------------------|--------|
| DS | luteolin                                                                               | IL6    |
| DS | luteolin                                                                               | GSTP1  |
| DS | 5,6-dihydroxy-7-isopropyl-1,1-dimethyl-2,3-dihydrophenanthren-4-one                    | CHRM3  |
| DS | 5,6-dihydroxy-7-isopropyl-1,1-dimethyl-2,3-dihydrophenanthren-4-one                    | CA2    |
| DS | 2-isopropyl-8-methylphenanthrene-3,4-dione                                             | CHRM3  |
| DS | 2-isopropyl-8-methylphenanthrene-3,4-dione                                             | GABRA1 |
| DS | 3 $\alpha$ -hydroxytanshinoneIIa                                                       | F2     |
| DS | 4-methylenemiltirone                                                                   | CHRM3  |
| DS | 4-methylenemiltirone                                                                   | CA2    |
| DS | 4-methylenemiltirone                                                                   | GABRA1 |
| DS | 2-(4-hydroxy-3-methoxyphenyl)-5-(3-hydroxypropyl)-7-methoxy-3-benzofurancarboxaldehyde | F2     |
| DS | 2-(4-hydroxy-3-methoxyphenyl)-5-(3-hydroxypropyl)-7-methoxy-3-benzofurancarboxaldehyde | ESR2   |
| DS | formyltanshinone                                                                       | F2     |
| DS | 3-beta-Hydroxymethylenetanshinquinone                                                  | F2     |
| DS | 3-beta-Hydroxymethylenetanshinquinone                                                  | CA2    |
| DS | Methylenetanshinquinone                                                                | CHRM3  |
| DS | Methylenetanshinquinone                                                                | F2     |
| DS | Methylenetanshinquinone                                                                | CA2    |
| DS | Methylenetanshinquinone                                                                | GABRA1 |
| DS | Przewaquinone B                                                                        | F2     |
| DS | przewaquinone c                                                                        | CHRM3  |
| DS | przewaquinone c                                                                        | F2     |
| DS | przewaquinone c                                                                        | CA2    |
| DS | przewaquinone c                                                                        | GABRA1 |
| DS | (6S,7R)-6,7-dihydroxy-1,6-dimethyl-8,9-dihydro-7H-naphtho[8,7-g]benzofuran-10,11-dione | F2     |
| DS | (6S,7R)-6,7-dihydroxy-1,6-dimethyl-8,9-dihydro-7H-naphtho[8,7-g]benzofuran-10,11-dione | CA2    |
| DS | przewaquinone f                                                                        | F2     |
| DS | tanshinaldehyde                                                                        | F2     |
| DS | Danshenol B                                                                            | CA2    |
| DS | Danshenol A                                                                            | F10    |
| DS | Salvilenone                                                                            | ESR2   |
| DS | cryptotanshinone                                                                       | CHRM3  |
| DS | cryptotanshinone                                                                       | CA2    |
| DS | cryptotanshinone                                                                       | GABRA1 |
| DS | cryptotanshinone                                                                       | BCL2L1 |
| DS | dan-shexinkum d                                                                        | F2     |
| DS | dan-shexinkum d                                                                        | F10    |
| DS | dan-shexinkum d                                                                        | CA2    |
| DS | dan-shexinkum d                                                                        | ESR2   |
| DS | danshenspiroketallactone                                                               | CHRM3  |
| DS | danshenspiroketallactone                                                               | F2     |
| DS | danshenspiroketallactone                                                               | CA2    |
| DS | danshenspiroketallactone                                                               | GABRA1 |
| DS | deoxyneocryptotanshinone                                                               | CHRM3  |

|    |                                                                                        |        |
|----|----------------------------------------------------------------------------------------|--------|
| DS | deoxyneocryptotanshinone                                                               | CA2    |
| DS | dihydrotanshinolactone                                                                 | CHRM3  |
| DS | dihydrotanshinolactone                                                                 | F2     |
| DS | dihydrotanshinolactone                                                                 | CA2    |
| DS | dihydrotanshinolactone                                                                 | GABRA1 |
| DS | dihydrotanshinoneI                                                                     | GABRA1 |
| DS | epidanshenspiroketallactone                                                            | CHRM3  |
| DS | epidanshenspiroketallactone                                                            | GABRA1 |
| DS | C09092                                                                                 | CHRM3  |
| DS | C09092                                                                                 | F2     |
| DS | C09092                                                                                 | CA2    |
| DS | isocryptotanshi-none                                                                   | CHRM3  |
| DS | isocryptotanshi-none                                                                   | F10    |
| DS | isocryptotanshi-none                                                                   | CA2    |
| DS | isocryptotanshi-none                                                                   | GABRA1 |
| DS | Isotanshinone II                                                                       | CHRM3  |
| DS | Isotanshinone II                                                                       | F2     |
| DS | Isotanshinone II                                                                       | ESR2   |
| DS | Isotanshinone II                                                                       | GABRA1 |
| DS | miltionone I                                                                           | CHRM3  |
| DS | miltionone I                                                                           | F10    |
| DS | miltionone I                                                                           | CA2    |
| DS | miltionone II                                                                          | F2     |
| DS | miltionone II                                                                          | CA2    |
| DS | Miltirone                                                                              | CHRM3  |
| DS | Miltirone                                                                              | CA2    |
| DS | neocryptotanshinone ii                                                                 | CHRM3  |
| DS | neocryptotanshinone ii                                                                 | CA2    |
| DS | neocryptotanshinone ii                                                                 | GABRA1 |
| DS | neocryptotanshinone                                                                    | CHRM3  |
| DS | neocryptotanshinone                                                                    | CA2    |
| DS | 1-methyl-8,9-dihydro-7H-naphtho[5,6-g]benzofuran-6,10,11-trione                        | CHRM3  |
| DS | 1-methyl-8,9-dihydro-7H-naphtho[5,6-g]benzofuran-6,10,11-trione                        | F2     |
| DS | 1-methyl-8,9-dihydro-7H-naphtho[5,6-g]benzofuran-6,10,11-trione                        | CA2    |
| DS | 1-methyl-8,9-dihydro-7H-naphtho[5,6-g]benzofuran-6,10,11-trione                        | GABRA1 |
| DS | prolithospermic acid                                                                   | F2     |
| DS | (2R)-3-(3,4-dihydroxyphenyl)-2-[(Z)-3-(3,4-dihydroxyphenyl)acryloyl]oxy-propionic acid | F2     |
| DS | salvianolic acid j                                                                     | F7     |
| DS | salviolone                                                                             | CHRM3  |
| DS | salviolone                                                                             | F2     |
| DS | salviolone                                                                             | GABRA2 |
| DS | salviolone                                                                             | GABRA5 |
| DS | salviolone                                                                             | GABRA3 |
| DS | salviolone                                                                             | GABRA1 |
| DS | salviolone                                                                             | GABRA6 |
| DS | salviolone                                                                             | GABRG3 |
| DS | salviolone                                                                             | GABRE  |



|    |                                                                                          |        |
|----|------------------------------------------------------------------------------------------|--------|
| DS | (6S)-6-hydroxy-1-methyl-6-methylol-8,9-dihydro-7H-naphtho[8,7-g]benzofuran-10,11-quinone | F2     |
| DS | (6S)-6-hydroxy-1-methyl-6-methylol-8,9-dihydro-7H-naphtho[8,7-g]benzofuran-10,11-quinone | CA2    |
| DS | Tanshindiol B                                                                            | F2     |
| DS | Tanshindiol B                                                                            | CA2    |
| DS | Przewaquinone E                                                                          | F2     |
| DS | Przewaquinone E                                                                          | CA2    |
| DS | tanshinone iia                                                                           | CHRM3  |
| DS | tanshinone iia                                                                           | F2     |
| DS | tanshinone iia                                                                           | BCL2   |
| DS | tanshinone iia                                                                           | CYP3A4 |
| DS | tanshinone iia                                                                           | CYP1A2 |
| DS | (6S)-6-(hydroxymethyl)-1,6-dimethyl-8,9-dihydro-7H-naphtho[8,7-g]benzofuran-10,11-dione  | F2     |
| DS | tanshinone VI                                                                            | F10    |
| DS | 1,2,5,6-tetrahydrotanshinone                                                             | PTGS1  |
| DS | 1,2,5,6-tetrahydrotanshinone                                                             | SCN5A  |
| DS | 1,2,5,6-tetrahydrotanshinone                                                             | PTGS2  |
| DS | 1,2,5,6-tetrahydrotanshinone                                                             | RXRA   |
| DS | 1,2,5,6-tetrahydrotanshinone                                                             | NCOA2  |
| DS | 1,2,5,6-tetrahydrotanshinone                                                             | NCOA1  |
| DS | Poriferasterol                                                                           | PGR    |
| DS | Poriferasterol                                                                           | NR3C2  |
| DS | poriferast-5-en-3beta-ol                                                                 | PGR    |
| DS | poriferast-5-en-3beta-ol                                                                 | NCOA2  |
| DS | isoimperatorin                                                                           | PTGS2  |
| DS | sugiol                                                                                   | SCN5A  |
| DS | sugiol                                                                                   | PTGS2  |
| DS | Dehydrotanshinone II A                                                                   | SCN5A  |
| DS | Dehydrotanshinone II A                                                                   | PPARG  |
| DS | Dehydrotanshinone II A                                                                   | PTGS2  |
| DS | Dehydrotanshinone II A                                                                   | NCOA1  |
| DS | digallate                                                                                | PTGS2  |
| DS | luteolin                                                                                 | PTGS1  |
| DS | luteolin                                                                                 | PTGS2  |
| DS | luteolin                                                                                 | NCOA2  |
| DS | luteolin                                                                                 | PRKACA |
| DS | luteolin                                                                                 | PIK3CG |
| DS | luteolin                                                                                 | TNF    |
| DS | luteolin                                                                                 | NFKBIA |
| DS | luteolin                                                                                 | XDH    |
| DS | luteolin                                                                                 | PPARG  |
| DS | luteolin                                                                                 | TYR    |
| DS | luteolin                                                                                 | TOP2A  |
| DS | 5,6-dihydroxy-7-isopropyl-1,1-dimethyl-2,3-dihydrophenanthren-4-one                      | PTGS1  |
| DS | 5,6-dihydroxy-7-isopropyl-1,1-dimethyl-2,3-dihydrophenanthren-4-one                      | SCN5A  |
| DS | 5,6-dihydroxy-7-isopropyl-1,1-dimethyl-2,3-dihydrophenanthren-4-one                      | PTGS2  |

|    |                                                                                        |        |
|----|----------------------------------------------------------------------------------------|--------|
| DS | 5,6-dihydroxy-7-isopropyl-1,1-dimethyl-2,3-dihydrophenanthren-4-one                    | RXRA   |
| DS | 5,6-dihydroxy-7-isopropyl-1,1-dimethyl-2,3-dihydrophenanthren-4-one                    | NCOA2  |
| DS | 5,6-dihydroxy-7-isopropyl-1,1-dimethyl-2,3-dihydrophenanthren-4-one                    | NCOA1  |
| DS | 2-isopropyl-8-methylphenanthrene-3,4-dione                                             | PTGS1  |
| DS | 2-isopropyl-8-methylphenanthrene-3,4-dione                                             | SCN5A  |
| DS | 2-isopropyl-8-methylphenanthrene-3,4-dione                                             | PPARG  |
| DS | 2-isopropyl-8-methylphenanthrene-3,4-dione                                             | PTGS2  |
| DS | 2-isopropyl-8-methylphenanthrene-3,4-dione                                             | RXRA   |
| DS | 2-isopropyl-8-methylphenanthrene-3,4-dione                                             | PIK3CG |
| DS | 2-isopropyl-8-methylphenanthrene-3,4-dione                                             | PRKACA |
| DS | 2-isopropyl-8-methylphenanthrene-3,4-dione                                             | PIM1   |
| DS | 2-isopropyl-8-methylphenanthrene-3,4-dione                                             | NCOA2  |
| DS | 3 $\alpha$ -hydroxytanshinoneIIa                                                       | SCN5A  |
| DS | 3 $\alpha$ -hydroxytanshinoneIIa                                                       | PTGS2  |
| DS | 3 $\alpha$ -hydroxytanshinoneIIa                                                       | NCOA1  |
| DS | Tournefolic acid A                                                                     | PTGS2  |
| DS | 4-methylenemiltirone                                                                   | PTGS1  |
| DS | 4-methylenemiltirone                                                                   | SCN5A  |
| DS | 4-methylenemiltirone                                                                   | PPARG  |
| DS | 4-methylenemiltirone                                                                   | PTGS2  |
| DS | 4-methylenemiltirone                                                                   | RXRA   |
| DS | 4-methylenemiltirone                                                                   | PRKACA |
| DS | 4-methylenemiltirone                                                                   | NCOA2  |
| DS | 4-methylenemiltirone                                                                   | NCOA1  |
| DS | 2-(4-hydroxy-3-methoxyphenyl)-5-(3-hydroxypropyl)-7-methoxy-3-benzofurancarboxaldehyde | NOS2   |
| DS | 2-(4-hydroxy-3-methoxyphenyl)-5-(3-hydroxypropyl)-7-methoxy-3-benzofurancarboxaldehyde | PPARG  |
| DS | 2-(4-hydroxy-3-methoxyphenyl)-5-(3-hydroxypropyl)-7-methoxy-3-benzofurancarboxaldehyde | PIM1   |
| DS | formyltanshinone                                                                       | PTGS2  |
| DS | formyltanshinone                                                                       | RXRA   |
| DS | formyltanshinone                                                                       | PIK3CG |
| DS | formyltanshinone                                                                       | PRKACA |
| DS | formyltanshinone                                                                       | NCOA1  |
| DS | 3-beta-Hydroxymethylenetanshiquinone                                                   | PTGS2  |
| DS | 3-beta-Hydroxymethylenetanshiquinone                                                   | RXRA   |
| DS | 3-beta-Hydroxymethylenetanshiquinone                                                   | NCOA1  |
| DS | Methylenetanshinquinone                                                                | SCN5A  |
| DS | Methylenetanshinquinone                                                                | PTGS2  |
| DS | Methylenetanshinquinone                                                                | RXRA   |
| DS | Methylenetanshinquinone                                                                | NCOA1  |
| DS | przewalskin a                                                                          | NR3C2  |
| DS | przewalskin a                                                                          | NR3C1  |
| DS | przewalskin b                                                                          | PTGS2  |
| DS | przewalskin b                                                                          | PGR    |

|    |                                                                                        |        |
|----|----------------------------------------------------------------------------------------|--------|
| DS | przewalskin b                                                                          | NR3C2  |
| DS | przewalskin b                                                                          | NR3C1  |
| DS | przewalskin b                                                                          | NCOA2  |
| DS | przewalskin b                                                                          | NCOA1  |
| DS | Przewaquinone B                                                                        | PTGS2  |
| DS | Przewaquinone B                                                                        | RXRA   |
| DS | Przewaquinone B                                                                        | PIK3CG |
| DS | Przewaquinone B                                                                        | NCOA1  |
| DS | przewaquinone c                                                                        | PTGS1  |
| DS | przewaquinone c                                                                        | SCN5A  |
| DS | przewaquinone c                                                                        | PTGS2  |
| DS | przewaquinone c                                                                        | PIK3CG |
| DS | przewaquinone c                                                                        | NCOA1  |
| DS | (6S,7R)-6,7-dihydroxy-1,6-dimethyl-8,9-dihydro-7H-naphtho[8,7-g]benzofuran-10,11-dione | PTGS2  |
| DS | (6S,7R)-6,7-dihydroxy-1,6-dimethyl-8,9-dihydro-7H-naphtho[8,7-g]benzofuran-10,11-dione | NCOA1  |
| DS | przewaquinone f                                                                        | PTGS2  |
| DS | przewaquinone f                                                                        | NCOA1  |
| DS | C09092                                                                                 | PTGS2  |
| DS | tanshinaldehyde                                                                        | PTGS2  |
| DS | tanshinaldehyde                                                                        | NCOA1  |
| DS | Danshenol B                                                                            | PTGS2  |
| DS | Danshenol B                                                                            | PGR    |
| DS | Danshenol B                                                                            | NR3C1  |
| DS | Danshenol B                                                                            | NCOA1  |
| DS | Danshenol A                                                                            | PTGS1  |
| DS | Danshenol A                                                                            | SCN5A  |
| DS | Danshenol A                                                                            | PTGS2  |
| DS | Danshenol A                                                                            | RXRA   |
| DS | Danshenol A                                                                            | PIK3CG |
| DS | Danshenol A                                                                            | NCOA1  |
| DS | Salvilenone                                                                            | PTGS1  |
| DS | Salvilenone                                                                            | PTGS2  |
| DS | Salvilenone                                                                            | PIM1   |
| DS | cryptotanshinone                                                                       | PTGS1  |
| DS | cryptotanshinone                                                                       | SCN5A  |
| DS | cryptotanshinone                                                                       | PTGS2  |
| DS | cryptotanshinone                                                                       | NCOA2  |
| DS | cryptotanshinone                                                                       | NCOA1  |
| DS | cryptotanshinone                                                                       | PGR    |
| DS | cryptotanshinone                                                                       | TNF    |
| DS | dan-shexinkum d                                                                        | NOS2   |
| DS | dan-shexinkum d                                                                        | PTGS1  |
| DS | dan-shexinkum d                                                                        | SCN5A  |
| DS | dan-shexinkum d                                                                        | PPARG  |
| DS | dan-shexinkum d                                                                        | PTGS2  |
| DS | dan-shexinkum d                                                                        | RXRA   |
| DS | dan-shexinkum d                                                                        | PIM1   |
| DS | dan-shexinkum d                                                                        | NCOA2  |
| DS | dan-shexinkum d                                                                        | NCOA1  |
| DS | danshenspiroketalactone                                                                | PTGS1  |

|    |                             |        |
|----|-----------------------------|--------|
| DS | danshenspiroketallactone    | SCN5A  |
| DS | danshenspiroketallactone    | PTGS2  |
| DS | danshenspiroketallactone    | RXRA   |
| DS | deoxyneocryptotanshinone    | PTGS1  |
| DS | deoxyneocryptotanshinone    | SCN5A  |
| DS | deoxyneocryptotanshinone    | PTGS2  |
| DS | deoxyneocryptotanshinone    | RXRA   |
| DS | deoxyneocryptotanshinone    | PIM1   |
| DS | deoxyneocryptotanshinone    | NCOA2  |
| DS | deoxyneocryptotanshinone    | NCOA1  |
| DS | dihydrotanshinlactone       | NOS2   |
| DS | dihydrotanshinlactone       | PTGS1  |
| DS | dihydrotanshinlactone       | SCN5A  |
| DS | dihydrotanshinlactone       | PPARG  |
| DS | dihydrotanshinlactone       | PTGS2  |
| DS | dihydrotanshinlactone       | RXRA   |
| DS | dihydrotanshinlactone       | PIK3CG |
| DS | dihydrotanshinlactone       | PRKACA |
| DS | dihydrotanshinlactone       | PIM1   |
| DS | dihydrotanshinoneI          | PTGS1  |
| DS | dihydrotanshinoneI          | SCN5A  |
| DS | dihydrotanshinoneI          | PTGS2  |
| DS | dihydrotanshinoneI          | RXRA   |
| DS | dihydrotanshinoneI          | PIK3CG |
| DS | dihydrotanshinoneI          | PRKACA |
| DS | dihydrotanshinoneI          | NCOA2  |
| DS | dihydrotanshinoneI          | NCOA1  |
| DS | epidanshenspiroketallactone | PTGS1  |
| DS | epidanshenspiroketallactone | SCN5A  |
| DS | epidanshenspiroketallactone | PTGS2  |
| DS | epidanshenspiroketallactone | RXRA   |
| DS | epidanshenspiroketallactone | PIM1   |
| DS | C09092                      | SCN5A  |
| DS | isocryptotanshi-none        | NOS2   |
| DS | isocryptotanshi-none        | PTGS1  |
| DS | isocryptotanshi-none        | SCN5A  |
| DS | isocryptotanshi-none        | PTGS2  |
| DS | isocryptotanshi-none        | RXRA   |
| DS | isocryptotanshi-none        | PIM1   |
| DS | isocryptotanshi-none        | NCOA2  |
| DS | isocryptotanshi-none        | NCOA1  |
| DS | Isotanshinone II            | NOS2   |
| DS | Isotanshinone II            | SCN5A  |
| DS | Isotanshinone II            | PTGS2  |
| DS | Isotanshinone II            | RXRA   |
| DS | Isotanshinone II            | PIM1   |
| DS | manool                      | NCOA2  |
| DS | miltionone I                | PTGS1  |
| DS | miltionone I                | SCN5A  |
| DS | miltionone I                | PTGS2  |
| DS | miltionone I                | RXRA   |
| DS | miltionone I                | NR3C1  |

|    |                                                                                        |        |
|----|----------------------------------------------------------------------------------------|--------|
| DS | miltionone I                                                                           | PIM1   |
| DS | miltionone I                                                                           | NCOA2  |
| DS | miltionone I                                                                           | NCOA1  |
| DS | miltionone II                                                                          | PTGS2  |
| DS | miltionone II                                                                          | PGR    |
| DS | miltionone II                                                                          | NR3C1  |
| DS | miltionone II                                                                          | NCOA2  |
| DS | miltionone II                                                                          | NCOA1  |
| DS | Miltirone                                                                              | PTGS1  |
| DS | Miltirone                                                                              | SCN5A  |
| DS | Miltirone                                                                              | PTGS2  |
| DS | Miltirone                                                                              | RXRA   |
| DS | Miltirone                                                                              | NCOA2  |
| DS | neocryptotanshinone ii                                                                 | PTGS1  |
| DS | neocryptotanshinone ii                                                                 | SCN5A  |
| DS | neocryptotanshinone ii                                                                 | PTGS2  |
| DS | neocryptotanshinone ii                                                                 | RXRA   |
| DS | neocryptotanshinone ii                                                                 | PIM1   |
| DS | neocryptotanshinone                                                                    | PTGS1  |
| DS | neocryptotanshinone                                                                    | SCN5A  |
| DS | neocryptotanshinone                                                                    | PPARG  |
| DS | neocryptotanshinone                                                                    | PTGS2  |
| DS | neocryptotanshinone                                                                    | NCOA2  |
| DS | neocryptotanshinone                                                                    | NCOA1  |
| DS | 1-methyl-8,9-dihydro-7H-naphtho[5,6-g]benzofuran-6,10,11-trione                        | PTGS1  |
| DS | 1-methyl-8,9-dihydro-7H-naphtho[5,6-g]benzofuran-6,10,11-trione                        | SCN5A  |
| DS | 1-methyl-8,9-dihydro-7H-naphtho[5,6-g]benzofuran-6,10,11-trione                        | PTGS2  |
| DS | 1-methyl-8,9-dihydro-7H-naphtho[5,6-g]benzofuran-6,10,11-trione                        | RXRA   |
| DS | 1-methyl-8,9-dihydro-7H-naphtho[5,6-g]benzofuran-6,10,11-trione                        | PIK3CG |
| DS | 1-methyl-8,9-dihydro-7H-naphtho[5,6-g]benzofuran-6,10,11-trione                        | NCOA1  |
| DS | prolithospermic acid                                                                   | NOS2   |
| DS | prolithospermic acid                                                                   | PTGS1  |
| DS | prolithospermic acid                                                                   | PTGS2  |
| DS | (2R)-3-(3,4-dihydroxyphenyl)-2-[(Z)-3-(3,4-dihydroxyphenyl)acryloyl]oxy-propionic acid | PPARG  |
| DS | (2R)-3-(3,4-dihydroxyphenyl)-2-[(Z)-3-(3,4-dihydroxyphenyl)acryloyl]oxy-propionic acid | PTGS2  |
| DS | salvianolic acid g                                                                     | PTGS2  |
| DS | salvilenone I                                                                          | PTGS2  |
| DS | salvilenone I                                                                          | RXRA   |
| DS | salvilenone I                                                                          | PGR    |
| DS | salvilenone I                                                                          | NR3C1  |
| DS | salvilenone I                                                                          | NCOA2  |
| DS | salvilenone I                                                                          | NCOA1  |
| DS | salviolone                                                                             | PTGS1  |
| DS | salviolone                                                                             | SCN5A  |

|    |                                                                                                                  |        |
|----|------------------------------------------------------------------------------------------------------------------|--------|
| DS | salviolone                                                                                                       | PTGS2  |
| DS | (6S)-6-hydroxy-1-methyl-6-methylol-8,9-dihydro-7H-naphtho[8,7-g]benzofuran-10,11-quinone                         | PTGS2  |
| DS | (6S)-6-hydroxy-1-methyl-6-methylol-8,9-dihydro-7H-naphtho[8,7-g]benzofuran-10,11-quinone                         | NCOA1  |
| DS | Tanshindiol B                                                                                                    | PTGS2  |
| DS | Tanshindiol B                                                                                                    | NCOA1  |
| DS | Przewaquinone E                                                                                                  | PTGS2  |
| DS | Przewaquinone E                                                                                                  | NCOA1  |
| DS | tanshinone iia                                                                                                   | SCN5A  |
| DS | tanshinone iia                                                                                                   | PTGS2  |
| DS | tanshinone iia                                                                                                   | NCOA1  |
| DS | tanshinone iia                                                                                                   | RXRA   |
| DS | tanshinone iia                                                                                                   | NFKBIA |
| DS | tanshinone iia                                                                                                   | NR1I2  |
| DS | (6S)-6-(hydroxymethyl)-1,6-dimethyl-8,9-dihydro-7H-naphtho[8,7-g]benzofuran-10,11-dione                          | SCN5A  |
| DS | (6S)-6-(hydroxymethyl)-1,6-dimethyl-8,9-dihydro-7H-naphtho[8,7-g]benzofuran-10,11-dione                          | PTGS2  |
| DS | (6S)-6-(hydroxymethyl)-1,6-dimethyl-8,9-dihydro-7H-naphtho[8,7-g]benzofuran-10,11-dione                          | NCOA1  |
| DS | tanshinone VI                                                                                                    | PTGS1  |
| DS | tanshinone VI                                                                                                    | SCN5A  |
| DS | tanshinone VI                                                                                                    | PPARG  |
| DS | tanshinone VI                                                                                                    | PTGS2  |
| DS | tanshinone VI                                                                                                    | NCOA2  |
| DS | tanshinone VI                                                                                                    | NCOA1  |
| HH | 6-Hydroxykaempferol                                                                                              | AR     |
| HH | 4-[(E)-4-(3,5-dimethoxy-4-oxo-1-cyclohexa-2,5-dienylidene)but-2-enylidene]-2,6-dimethoxycyclohexa-2,5-dien-1-one | F2     |
| HH | quercetin                                                                                                        | AR     |
| HH | quercetin                                                                                                        | F2     |
| HH | quercetin                                                                                                        | F10    |
| HH | quercetin                                                                                                        | F7     |
| HH | quercetin                                                                                                        | ACHE   |
| HH | quercetin                                                                                                        | GABRA1 |
| HH | quercetin                                                                                                        | AKT1   |
| HH | quercetin                                                                                                        | BCL2   |
| HH | quercetin                                                                                                        | BCL2L1 |
| HH | quercetin                                                                                                        | CYP3A4 |
| HH | quercetin                                                                                                        | CYP1A2 |
| HH | quercetin                                                                                                        | ALOX5  |
| HH | quercetin                                                                                                        | AHR    |
| HH | 7,8-dimethyl-1H-pyrimido[5,6-g]quinoxaline-2,4-dione                                                             | GABRA1 |
| HH | quercetagetin                                                                                                    | AR     |
| HH | Stigmasterol                                                                                                     | ADH1C  |
| HH | Stigmasterol                                                                                                     | AR     |
| HH | Stigmasterol                                                                                                     | CHRM3  |
| HH | Stigmasterol                                                                                                     | GABRA3 |
| HH | Stigmasterol                                                                                                     | GABRA1 |

|    |                                                                                                                  |        |
|----|------------------------------------------------------------------------------------------------------------------|--------|
| HH | lignan                                                                                                           | F10    |
| HH | lignan                                                                                                           | CA2    |
| HH | kaempferol                                                                                                       | AR     |
| HH | kaempferol                                                                                                       | F2     |
| HH | kaempferol                                                                                                       | GABRA2 |
| HH | kaempferol                                                                                                       | ACHE   |
| HH | kaempferol                                                                                                       | GABRA1 |
| HH | kaempferol                                                                                                       | F7     |
| HH | kaempferol                                                                                                       | AKT1   |
| HH | kaempferol                                                                                                       | BCL2   |
| HH | kaempferol                                                                                                       | CYP3A4 |
| HH | kaempferol                                                                                                       | CYP1A2 |
| HH | kaempferol                                                                                                       | ALOX5  |
| HH | kaempferol                                                                                                       | AHR    |
| HH | kaempferol                                                                                                       | AKR1C3 |
| HH | Baicalin                                                                                                         | F10    |
| HH | beta-carotene                                                                                                    | AKT1   |
| HH | beta-carotene                                                                                                    | BCL2   |
| HH | beta-carotene                                                                                                    | CYP3A4 |
| HH | beta-carotene                                                                                                    | CYP1A2 |
| HH | beta-sitosterol                                                                                                  | CHRM3  |
| HH | beta-sitosterol                                                                                                  | GABRA2 |
| HH | beta-sitosterol                                                                                                  | GABRA3 |
| HH | beta-sitosterol                                                                                                  | GABRA1 |
| HH | beta-sitosterol                                                                                                  | BCL2   |
| HH | luteolin                                                                                                         | AR     |
| HH | luteolin                                                                                                         | AKT1   |
| HH | luteolin                                                                                                         | BCL2L1 |
| HH | baicalein                                                                                                        | AR     |
| HH | baicalein                                                                                                        | AKT1   |
| HH | baicalein                                                                                                        | BCL2   |
| HH | baicalein                                                                                                        | AHR    |
| HH | 6-Hydroxykaempferol                                                                                              | NOS2   |
| HH | 6-Hydroxykaempferol                                                                                              | PTGS1  |
| HH | 6-Hydroxykaempferol                                                                                              | PTGS2  |
| HH | 6-Hydroxykaempferol                                                                                              | PIK3CG |
| HH | 6-Hydroxykaempferol                                                                                              | NCOA2  |
| HH | qt carthamone                                                                                                    | PTGS1  |
| HH | qt carthamone                                                                                                    | PTGS2  |
| HH | 4-[(E)-4-(3,5-dimethoxy-4-oxo-1-cyclohexa-2,5-dienylidene)but-2-enylidene]-2,6-dimethoxycyclohexa-2,5-dien-1-one | PTGS2  |
| HH | 4-[(E)-4-(3,5-dimethoxy-4-oxo-1-cyclohexa-2,5-dienylidene)but-2-enylidene]-2,6-dimethoxycyclohexa-2,5-dien-1-one | NCOA2  |
| HH | Pyrethrin II                                                                                                     | PTGS2  |
| HH | Pyrethrin II                                                                                                     | NCOA2  |
| HH | quercetin                                                                                                        | PTGS1  |
| HH | quercetin                                                                                                        | PTGS2  |
| HH | quercetin                                                                                                        | PIK3CG |
| HH | quercetin                                                                                                        | NCOA2  |
| HH | quercetin                                                                                                        | SCN5A  |

|    |                                                      |        |
|----|------------------------------------------------------|--------|
| HH | quercetin                                            | PRKACA |
| HH | quercetin                                            | RXRA   |
| HH | quercetin                                            | TNF    |
| HH | quercetin                                            | IL6    |
| HH | quercetin                                            | NFKBIA |
| HH | quercetin                                            | XDH    |
| HH | quercetin                                            | PRKCA  |
| HH | quercetin                                            | IL1B   |
| HH | quercetin                                            | PRKCB  |
| HH | quercetin                                            | NR1I2  |
| HH | quercetin                                            | MPO    |
| HH | quercetin                                            | TOP2A  |
| HH | quercetin                                            | GSTP1  |
| HH | quercetin                                            | NQO1   |
| HH | quercetin                                            | NR1I3  |
| HH | quercetin                                            | PPARA  |
| HH | quercetin                                            | PPARD  |
| HH | 7,8-dimethyl-1H-pyrimido[5,6-g]quinoxaline-2,4-dione | PTGS1  |
| HH | 7,8-dimethyl-1H-pyrimido[5,6-g]quinoxaline-2,4-dione | PTGS2  |
| HH | 7,8-dimethyl-1H-pyrimido[5,6-g]quinoxaline-2,4-dione | PRKACA |
| HH | quercetagetin                                        | PTGS2  |
| HH | quercetagetin                                        | PIK3CG |
| HH | Stigmasterol                                         | PGR    |
| HH | Stigmasterol                                         | NR3C2  |
| HH | Stigmasterol                                         | NCOA2  |
| HH | Stigmasterol                                         | RXRA   |
| HH | Stigmasterol                                         | NCOA1  |
| HH | Stigmasterol                                         | PTGS1  |
| HH | Stigmasterol                                         | PTGS2  |
| HH | Stigmasterol                                         | PRKACA |
| HH | Stigmasterol                                         | SCN5A  |
| HH | lignan                                               | PTGS2  |
| HH | lignan                                               | NCOA2  |
| HH | kaempferol                                           | NOS2   |
| HH | kaempferol                                           | PTGS1  |
| HH | kaempferol                                           | PTGS2  |
| HH | kaempferol                                           | PIK3CG |
| HH | kaempferol                                           | PRKACA |
| HH | kaempferol                                           | NCOA2  |
| HH | kaempferol                                           | PGR    |
| HH | kaempferol                                           | TNF    |
| HH | kaempferol                                           | XDH    |
| HH | kaempferol                                           | NR1I2  |
| HH | kaempferol                                           | GSTP1  |
| HH | kaempferol                                           | NR1I3  |
| HH | CLR                                                  | PGR    |
| HH | CLR                                                  | NR3C2  |
| HH | CLR                                                  | NCOA2  |
| HH | beta-carotene                                        | PTGS2  |



|    |                          |        |
|----|--------------------------|--------|
| HH | poriferast-5-en-3beta-ol | PGR    |
| HH | poriferast-5-en-3beta-ol | NCOA2  |
| HH | beta-sitosterol          | PGR    |
| HH | beta-sitosterol          | NCOA2  |
| HH | beta-sitosterol          | PTGS1  |
| HH | beta-sitosterol          | PTGS2  |
| HH | beta-sitosterol          | PIK3CG |
| HH | beta-sitosterol          | PRKACA |
| HH | beta-sitosterol          | SCN5A  |
| HH | beta-sitosterol          | GABRA5 |
| HH | beta-sitosterol          | PRKCA  |
| HH | luteolin                 | PTGS1  |
| HH | luteolin                 | PTGS2  |
| HH | luteolin                 | NCOA2  |
| HH | luteolin                 | PRKACA |
| HH | luteolin                 | PIK3CG |
| HH | luteolin                 | TNF    |
| HH | luteolin                 | IL6    |
| HH | luteolin                 | NFKBIA |
| HH | luteolin                 | XDH    |
| HH | luteolin                 | TYR    |
| HH | luteolin                 | TOP2A  |
| HH | luteolin                 | GSTP1  |
| HH | baicalein                | PTGS1  |
| HH | baicalein                | PTGS2  |
| HH | baicalein                | PRKACA |
| HH | baicalein                | PIK3CG |
| HH | baicalein                | NCOA2  |
| HH | baicalein                | NCOA1  |
| HH | baicalein                | MPO    |
| SQ | quercetin                | PTGS1  |
| SQ | quercetin                | AR     |
| SQ | quercetin                | PPARG  |
| SQ | quercetin                | PTGS2  |
| SQ | quercetin                | PIK3CG |
| SQ | quercetin                | NCOA2  |
| SQ | quercetin                | F2     |
| SQ | quercetin                | SCN5A  |
| SQ | quercetin                | F10    |
| SQ | quercetin                | PRKACA |
| SQ | quercetin                | F7     |
| SQ | quercetin                | RXRA   |
| SQ | quercetin                | ACHE   |
| SQ | quercetin                | GABRA1 |
| SQ | quercetin                | AKT1   |
| SQ | quercetin                | BCL2   |
| SQ | quercetin                | BCL2L1 |
| SQ | quercetin                | TNF    |
| SQ | quercetin                | IL6    |
| SQ | quercetin                | NFKBIA |
| SQ | quercetin                | XDH    |
| SQ | quercetin                | PRKCA  |

|    |                 |        |
|----|-----------------|--------|
| SQ | quercetin       | CYP3A4 |
| SQ | quercetin       | IL1B   |
| SQ | quercetin       | NR1I2  |
| SQ | quercetin       | ALOX5  |
| SQ | quercetin       | MPO    |
| SQ | quercetin       | TOP2A  |
| SQ | quercetin       | GSTP1  |
| SQ | quercetin       | NQO1   |
| SQ | quercetin       | AHR    |
| SQ | quercetin       | NR1I3  |
| SQ | quercetin       | PPARA  |
| SQ | quercetin       | PPARD  |
| SQ | Stigmasterol    | PGR    |
| SQ | Stigmasterol    | NR3C2  |
| SQ | Stigmasterol    | NCOA2  |
| SQ | Stigmasterol    | ADH1C  |
| SQ | Stigmasterol    | RXRA   |
| SQ | Stigmasterol    | NCOA1  |
| SQ | Stigmasterol    | PTGS1  |
| SQ | Stigmasterol    | PTGS2  |
| SQ | Stigmasterol    | AR     |
| SQ | Stigmasterol    | PRKACA |
| SQ | Stigmasterol    | CHRM3  |
| SQ | Stigmasterol    | SCN5A  |
| SQ | Stigmasterol    | GABRA3 |
| SQ | Stigmasterol    | GABRA1 |
| SQ | Diop            | SCN5A  |
| SQ | Diop            | CHRM3  |
| SQ | Mandenol        | PTGS1  |
| SQ | Mandenol        | PTGS2  |
| SQ | Mandenol        | NCOA2  |
| SQ | beta-sitosterol | PGR    |
| SQ | beta-sitosterol | NCOA2  |
| SQ | beta-sitosterol | PTGS1  |
| SQ | beta-sitosterol | PTGS2  |
| SQ | beta-sitosterol | PIK3CG |
| SQ | beta-sitosterol | PRKACA |
| SQ | beta-sitosterol | CHRM3  |
| SQ | beta-sitosterol | SCN5A  |
| SQ | beta-sitosterol | GABRA2 |
| SQ | beta-sitosterol | GABRA5 |
| SQ | beta-sitosterol | GABRA3 |
| SQ | beta-sitosterol | GABRA1 |
| SQ | beta-sitosterol | BCL2   |
| SQ | beta-sitosterol | PRKCA  |
| SQ | ginsenoside rh2 | TNF    |
| SQ | ginsenoside rh2 | PTGS2  |
| SQ | ginsenoside rh2 | NFKBIA |
| SQ | ginsenoside rh2 | IL1B   |
| SQ | DFV             | PTGS1  |
| SQ | DFV             | PTGS2  |
| SQ | DFV             | RXRA   |

|    |                                                                            |        |
|----|----------------------------------------------------------------------------|--------|
| SQ | DFV                                                                        | PIK3CG |
| SQ | DFV                                                                        | PRKACA |
| DG | Stigmasterol                                                               | PGR    |
| DG | Stigmasterol                                                               | NR3C2  |
| DG | Stigmasterol                                                               | NCOA2  |
| DG | Stigmasterol                                                               | ADH1C  |
| DG | Stigmasterol                                                               | RXRA   |
| DG | Stigmasterol                                                               | NCOA1  |
| DG | Stigmasterol                                                               | PTGS1  |
| DG | Stigmasterol                                                               | PTGS2  |
| DG | beta-sitosterol                                                            | PGR    |
| DG | beta-sitosterol                                                            | NCOA2  |
| DG | beta-sitosterol                                                            | PTGS1  |
| DG | beta-sitosterol                                                            | PTGS2  |
| DG | beta-sitosterol                                                            | PIK3CG |
| DG | beta-sitosterol                                                            | PRKACA |
| DG | beta-sitosterol                                                            | CHRM3  |
| DG | beta-sitosterol                                                            | SCN5A  |
| DG | beta-sitosterol                                                            | GABRA2 |
| DG | beta-sitosterol                                                            | GABRA5 |
| DG | beta-sitosterol                                                            | GABRA3 |
| DG | beta-sitosterol                                                            | GABRA1 |
| DG | beta-sitosterol                                                            | BCL2   |
| DG | beta-sitosterol                                                            | PRKCA  |
| HQ | 7-O-methylisomucronulatol                                                  | NOS2   |
| HQ | 7-O-methylisomucronulatol                                                  | CHRM3  |
| HQ | 7-O-methylisomucronulatol                                                  | AR     |
| HQ | 7-O-methylisomucronulatol                                                  | PPARG  |
| HQ | 7-O-methylisomucronulatol                                                  | ESR2   |
| HQ | 7-O-methylisomucronulatol                                                  | GABRA1 |
| HQ | 7-O-methylisomucronulatol                                                  | PRKACA |
| HQ | 7-O-methylisomucronulatol                                                  | PIM1   |
| HQ | 7-O-methylisomucronulatol                                                  | NCOA2  |
| HQ | formononetin                                                               | NOS2   |
| HQ | formononetin                                                               | AR     |
| HQ | formononetin                                                               | PPARG  |
| HQ | formononetin                                                               | ESR2   |
| HQ | formononetin                                                               | PRKACA |
| HQ | formononetin                                                               | PIM1   |
| HQ | formononetin                                                               | ACHE   |
| HQ | (6aR,11aR)-9,10-dimethoxy-6a,11a-dihydro-6H-benzofurano[3,2-c]chromen-3-ol | NOS2   |
| HQ | (6aR,11aR)-9,10-dimethoxy-6a,11a-dihydro-6H-benzofurano[3,2-c]chromen-3-ol | CHRM3  |
| HQ | (6aR,11aR)-9,10-dimethoxy-6a,11a-dihydro-6H-benzofurano[3,2-c]chromen-3-ol | ACHE   |
| HQ | (6aR,11aR)-9,10-dimethoxy-6a,11a-dihydro-6H-benzofurano[3,2-c]chromen-3-ol | GABRA1 |
| HQ | (6aR,11aR)-9,10-dimethoxy-6a,11a-dihydro-6H-benzofurano[3,2-c]chromen-3-ol | NCOA2  |
| HQ | (6aR,11aR)-9,10-dimethoxy-6a,11a-dihydro-6H-benzofurano[3,2-c]chromen-3-ol | NCOA1  |

|    |                         |        |
|----|-------------------------|--------|
| HQ | Betulinic Acid          | PGR    |
| HQ | 3,9-di-O-methylnissolin | NOS2   |
| HQ | 3,9-di-O-methylnissolin | CHRM3  |
| HQ | 3,9-di-O-methylnissolin | ACHE   |
| HQ | 3,9-di-O-methylnissolin | GABRA1 |
| HQ | 3,9-di-O-methylnissolin | NCOA2  |
| HQ | Jaranol                 | NOS2   |
| HQ | Jaranol                 | AR     |
| HQ | Jaranol                 | ESR2   |
| HQ | Jaranol                 | NCOA2  |
| HQ | isorhamnetin            | NOS2   |
| HQ | isorhamnetin            | AR     |
| HQ | isorhamnetin            | PPARG  |
| HQ | isorhamnetin            | ESR2   |
| HQ | isorhamnetin            | PIK3CG |
| HQ | isorhamnetin            | PRKACA |
| HQ | isorhamnetin            | PIM1   |
| HQ | isorhamnetin            | NCOA2  |
| HQ | isorhamnetin            | PPARD  |
| HQ | isorhamnetin            | NCOA1  |
| HQ | isorhamnetin            | ACHE   |
| HQ | isorhamnetin            | GABRA1 |
| HQ | Calycosin               | NOS2   |
| HQ | Calycosin               | AR     |
| HQ | Calycosin               | PPARG  |
| HQ | Calycosin               | ESR2   |
| HQ | Calycosin               | PRKACA |
| HQ | Calycosin               | PIM1   |
| HQ | Calycosin               | NCOA2  |
| HQ | quercetin               | AR     |
| HQ | quercetin               | PPARG  |
| HQ | quercetin               | PIK3CG |
| HQ | quercetin               | NCOA2  |
| HQ | quercetin               | PRKACA |
| HQ | quercetin               | ACHE   |
| HQ | quercetin               | GABRA1 |
| HQ | quercetin               | AKT1   |
| HQ | quercetin               | BCL2   |
| HQ | quercetin               | BCL2L1 |
| HQ | quercetin               | IL6    |
| HQ | quercetin               | NFKBIA |
| HQ | quercetin               | PRKCA  |
| HQ | quercetin               | CYP3A4 |
| HQ | quercetin               | CYP1A2 |
| HQ | quercetin               | IL1B   |
| HQ | quercetin               | PRKCB  |
| HQ | quercetin               | NR1I2  |
| HQ | quercetin               | ALOX5  |
| HQ | quercetin               | MPO    |
| HQ | quercetin               | GSTP1  |
| HQ | quercetin               | NQO1   |
| HQ | quercetin               | NR1I3  |

|    |                                                                            |        |
|----|----------------------------------------------------------------------------|--------|
| HQ | quercetin                                                                  | PPARA  |
| HQ | quercetin                                                                  | PPARD  |
| HQ | kaempferol                                                                 | ACHE   |
| HQ | kaempferol                                                                 | AKR1C3 |
| HQ | kaempferol                                                                 | AR     |
| HQ | kaempferol                                                                 | BCL2   |
| HQ | kaempferol                                                                 | ALOX5  |
| HQ | kaempferol                                                                 | CYP1A2 |
| HQ | kaempferol                                                                 | CYP3A4 |
| HQ | kaempferol                                                                 | GABRA1 |
| HQ | kaempferol                                                                 | GABRA2 |
| HQ | kaempferol                                                                 | GSTP1  |
| HQ | kaempferol                                                                 | PRKACA |
| HQ | kaempferol                                                                 | NOS2   |
| HQ | kaempferol                                                                 | NCOA2  |
| HQ | kaempferol                                                                 | NR1I2  |
| HQ | kaempferol                                                                 | NR1I3  |
| HQ | kaempferol                                                                 | PPARG  |
| HQ | kaempferol                                                                 | PIK3CG |
| HQ | kaempferol                                                                 | PGR    |
| HQ | kaempferol                                                                 | AKT1   |
| HQ | hederagenin                                                                | PGR    |
| HQ | hederagenin                                                                | NCOA2  |
| HQ | hederagenin                                                                | CHRM3  |
| HQ | hederagenin                                                                | GABRA2 |
| HQ | hederagenin                                                                | GABRA3 |
| HQ | hederagenin                                                                | GABRA1 |
| HQ | hederagenin                                                                | GABRA6 |
| HQ | hederagenin                                                                | GABRA5 |
| HQ | hederagenin                                                                | ADH1C  |
| HQ | hederagenin                                                                | LYZ    |
| HQ | 9,10-dimethoxypterocarpan-3-O- $\beta$ -D-glucoside                        | NCOA2  |
| HQ | (24S)-24-Propylcholesta-5-ene-3 $\beta$ -ol                                | PGR    |
| HQ | 7-O-methylisomucronulatol                                                  | PTGS1  |
| HQ | 7-O-methylisomucronulatol                                                  | SCN5A  |
| HQ | 7-O-methylisomucronulatol                                                  | PTGS2  |
| HQ | 7-O-methylisomucronulatol                                                  | RXRA   |
| HQ | 7-O-methylisomucronulatol                                                  | RXRB   |
| HQ | formononetin                                                               | PTGS1  |
| HQ | formononetin                                                               | PTGS2  |
| HQ | formononetin                                                               | RXRA   |
| HQ | (6aR,11aR)-9,10-dimethoxy-6a,11a-dihydro-6H-benzofurano[3,2-c]chromen-3-ol | PTGS1  |
| HQ | (6aR,11aR)-9,10-dimethoxy-6a,11a-dihydro-6H-benzofurano[3,2-c]chromen-3-ol | SCN5A  |
| HQ | (6aR,11aR)-9,10-dimethoxy-6a,11a-dihydro-6H-benzofurano[3,2-c]chromen-3-ol | PTGS2  |
| HQ | (6aR,11aR)-9,10-dimethoxy-6a,11a-dihydro-6H-benzofurano[3,2-c]chromen-3-ol | RXRA   |
| HQ | 3,9-di-O-methylnissolin                                                    | PTGS1  |
| HQ | 3,9-di-O-methylnissolin                                                    | SCN5A  |
| HQ | 3,9-di-O-methylnissolin                                                    | PTGS2  |

|    |                                                     |        |
|----|-----------------------------------------------------|--------|
| HQ | 3,9-di-O-methylnissolin                             | RXRA   |
| HQ | Jaranol                                             | PTGS1  |
| HQ | Jaranol                                             | SCN5A  |
| HQ | Jaranol                                             | PTGS2  |
| HQ | isorhamnetin                                        | PTGS1  |
| HQ | isorhamnetin                                        | PTGS2  |
| HQ | isorhamnetin                                        | XDH    |
| HQ | Calycosin                                           | PTGS1  |
| HQ | Calycosin                                           | PTGS2  |
| HQ | Calycosin                                           | RXRA   |
| HQ | quercetin                                           | PTGS1  |
| HQ | quercetin                                           | PTGS2  |
| HQ | quercetin                                           | SCN5A  |
| HQ | quercetin                                           | RXRA   |
| HQ | quercetin                                           | TNF    |
| HQ | quercetin                                           | XDH    |
| HQ | quercetin                                           | TOP2A  |
| HQ | kaempferol                                          | PTGS1  |
| HQ | kaempferol                                          | PTGS2  |
| HQ | kaempferol                                          | TNF    |
| HQ | kaempferol                                          | XDH    |
| HQ | 1,7-Dihydroxy-3,9-dimethoxy pterocarpene            | PTGS2  |
| HQ | 1,7-Dihydroxy-3,9-dimethoxy pterocarpene            | RXRA   |
| HQ | hederagenin                                         | PTGS1  |
| HQ | hederagenin                                         | SCN5A  |
| HQ | hederagenin                                         | PTGS2  |
| HQ | hederagenin                                         | RXRA   |
| HQ | 9,10-dimethoxypterocarpan-3-O- $\beta$ -D-glucoside | PTGS2  |
| HQ | Bifendate                                           | PTGS2  |
| HQ | Bifendate                                           | PTGS1  |
| NX | palmatine                                           | NOS2   |
| NX | palmatine                                           | PTGS1  |
| NX | palmatine                                           | AR     |
| NX | palmatine                                           | SCN5A  |
| NX | palmatine                                           | PTGS2  |
| NX | palmatine                                           | RXRA   |
| NX | palmatine                                           | ESR2   |
| NX | palmatine                                           | PIM1   |
| NX | palmatine                                           | NCOA2  |
| NX | palmatine                                           | PRKACA |
| NX | palmatine                                           | F7     |
| NX | quercetin                                           | PTGS1  |
| NX | quercetin                                           | AR     |
| NX | quercetin                                           | PPARG  |
| NX | quercetin                                           | PTGS2  |
| NX | quercetin                                           | PIK3CG |
| NX | quercetin                                           | NCOA2  |
| NX | quercetin                                           | F2     |
| NX | quercetin                                           | SCN5A  |
| NX | quercetin                                           | F10    |
| NX | quercetin                                           | PRKACA |
| NX | quercetin                                           | F7     |

|    |                                 |        |
|----|---------------------------------|--------|
| NX | quercetin                       | RXRA   |
| NX | quercetin                       | ACHE   |
| NX | quercetin                       | GABRA1 |
| NX | quercetin                       | AKT1   |
| NX | quercetin                       | BCL2   |
| NX | quercetin                       | BCL2L1 |
| NX | quercetin                       | TNF    |
| NX | quercetin                       | IL6    |
| NX | quercetin                       | NFKBIA |
| NX | quercetin                       | XDH    |
| NX | quercetin                       | PRKCA  |
| NX | quercetin                       | CYP3A4 |
| NX | quercetin                       | CYP1A2 |
| NX | quercetin                       | IL1B   |
| NX | quercetin                       | PRKCB  |
| NX | quercetin                       | NR1I2  |
| NX | quercetin                       | ALOX5  |
| NX | quercetin                       | MPO    |
| NX | quercetin                       | TOP2A  |
| NX | quercetin                       | GSTP1  |
| NX | quercetin                       | NQO1   |
| NX | quercetin                       | AHR    |
| NX | quercetin                       | NR1I3  |
| NX | quercetin                       | PPARA  |
| NX | quercetin                       | PPARD  |
| NX | Stigmasterol                    | PGR    |
| NX | Stigmasterol                    | NR3C2  |
| NX | Stigmasterol                    | NCOA2  |
| NX | Stigmasterol                    | ADH1C  |
| NX | Stigmasterol                    | RXRA   |
| NX | Stigmasterol                    | NCOA1  |
| NX | Stigmasterol                    | PTGS1  |
| NX | Stigmasterol                    | PTGS2  |
| NX | Stigmasterol                    | AR     |
| NX | Stigmasterol                    | PRKACA |
| NX | Stigmasterol                    | CHRM3  |
| NX | Stigmasterol                    | SCN5A  |
| NX | Stigmasterol                    | GABRA3 |
| NX | Stigmasterol                    | GABRA1 |
| NX | epiberberine                    | NOS2   |
| NX | epiberberine                    | AR     |
| NX | epiberberine                    | PTGS2  |
| NX | epiberberine                    | RXRA   |
| NX | epiberberine                    | PRKACA |
| NX | epiberberine                    | NCOA2  |
| NX | Spinasterol                     | PGR    |
| NX | Spinasterol                     | NR3C2  |
| NX | Spinasterol                     | NCOA2  |
| NX | poriferasta-7,22E-dien-3beta-ol | PGR    |
| NX | poriferasta-7,22E-dien-3beta-ol | NCOA2  |
| NX | poriferasta-7,22E-dien-3beta-ol | NR3C2  |
| NX | kaempferol                      | NOS2   |

|    |                      |        |
|----|----------------------|--------|
| NX | kaempferol           | PTGS1  |
| NX | kaempferol           | AR     |
| NX | kaempferol           | PPARG  |
| NX | kaempferol           | PTGS2  |
| NX | kaempferol           | PIK3CG |
| NX | kaempferol           | PRKACA |
| NX | kaempferol           | NCOA2  |
| NX | kaempferol           | PGR    |
| NX | kaempferol           | GABRA2 |
| NX | kaempferol           | ACHE   |
| NX | kaempferol           | GABRA1 |
| NX | kaempferol           | F7     |
| NX | kaempferol           | AKT1   |
| NX | kaempferol           | BCL2   |
| NX | kaempferol           | TNF    |
| NX | kaempferol           | XDH    |
| NX | kaempferol           | CYP3A4 |
| NX | kaempferol           | CYP1A2 |
| NX | kaempferol           | NR1I2  |
| NX | kaempferol           | ALOX5  |
| NX | kaempferol           | GSTP1  |
| NX | kaempferol           | AHR    |
| NX | kaempferol           | NR1I3  |
| NX | kaempferol           | AKR1C3 |
| NX | Baicalin             | F10    |
| NX | Inophyllum E         | PTGS1  |
| NX | Inophyllum E         | AR     |
| NX | Inophyllum E         | F10    |
| NX | Inophyllum E         | PTGS2  |
| NX | Inophyllum E         | ESR2   |
| NX | Inophyllum E         | PIM1   |
| NX | delta 7-stigmastenol | PGR    |
| NX | beta-sitosterol      | PGR    |
| NX | beta-sitosterol      | NCOA2  |
| NX | beta-sitosterol      | PTGS1  |
| NX | beta-sitosterol      | PTGS2  |
| NX | beta-sitosterol      | PIK3CG |
| NX | beta-sitosterol      | PRKACA |
| NX | beta-sitosterol      | CHRM3  |
| NX | beta-sitosterol      | SCN5A  |
| NX | beta-sitosterol      | GABRA2 |
| NX | beta-sitosterol      | GABRA5 |
| NX | beta-sitosterol      | GABRA3 |
| NX | beta-sitosterol      | GABRA1 |
| NX | beta-sitosterol      | BCL2   |
| NX | beta-sitosterol      | PRKCA  |
| NX | beta-daucosterol qt  | PGR    |
| NX | berberine            | NOS2   |
| NX | berberine            | PTGS1  |
| NX | berberine            | AR     |
| NX | berberine            | SCN5A  |
| NX | berberine            | F10    |



|    |                        |        |
|----|------------------------|--------|
| NX | berberine              | PTGS2  |
| NX | berberine              | RXRA   |
| NX | berberine              | PRKACA |
| NX | berberine              | NCOA2  |
| NX | 28-norolean-17-en-3-ol | PGR    |
| NX | baicalein              | PTGS1  |
| NX | baicalein              | AR     |
| NX | baicalein              | PTGS2  |
| NX | baicalein              | PRKACA |
| NX | baicalein              | PIK3CG |
| NX | baicalein              | NCOA2  |
| NX | baicalein              | NCOA1  |
| NX | baicalein              | AKT1   |
| NX | baicalein              | BCL2   |
| NX | baicalein              | MPO    |
| NX | baicalein              | AHR    |
| NX | wogonin                | NOS2   |
| NX | wogonin                | PTGS1  |
| NX | wogonin                | AR     |
| NX | wogonin                | SCN5A  |
| NX | wogonin                | PPARG  |
| NX | wogonin                | PTGS2  |
| NX | wogonin                | RXRA   |
| NX | wogonin                | PIK3CG |
| NX | wogonin                | PRKACA |
| NX | wogonin                | GABRA1 |
| NX | wogonin                | AKT1   |
| NX | wogonin                | BCL2   |
| NX | wogonin                | TNF    |
| NX | wogonin                | IL6    |
| NX | coptisine              | NOS2   |
| NX | coptisine              | PTGS1  |
| NX | coptisine              | AR     |
| NX | coptisine              | SCN5A  |
| NX | coptisine              | PTGS2  |

Table S5. 22 overlapping targets between the targets of YSHXD and RF-related targets

| <b>Entry</b> | <b>Protein Names</b>                                                           | <b>Common-Target</b> |
|--------------|--------------------------------------------------------------------------------|----------------------|
| P31749       | RAC-alpha serine/threonine-protein kinase                                      | AKT1                 |
| P09917       | Polyunsaturated fatty acid 5-lipoxygenase                                      | ALOX5                |
| P10275       | Androgen receptor                                                              | AR                   |
| P10415       | Apoptosis regulator Bcl-2                                                      | BCL2                 |
| P00918       | Carbonic anhydrase 2                                                           | CA2                  |
| P00734       | Prothrombin                                                                    | F2                   |
| P09211       | Glutathione S-transferase P                                                    | GSTP1                |
| P01584       | Interleukin-1 beta                                                             | IL1B                 |
| P05231       | Interleukin-6                                                                  | IL6                  |
| P61626       | Lysozyme C                                                                     | LYZ                  |
| P05164       | Myeloperoxidase                                                                | MPO                  |
| P35228       | Nitric oxide synthase                                                          | NOS2                 |
| P15559       | NAD(P)H dehydrogenase [quinone] 1                                              | NQO1                 |
| P08235       | Nuclear receptor subfamily 3 group C member 2                                  | NR3C2                |
| P48736       | Phosphatidylinositol 4,5-bisphosphate 3-kinase catalytic subunit gamma isoform | PIK3CG               |
| Q07869       | Peroxisome proliferator-activated receptor alpha                               | PPARA                |
| P37231       | Peroxisome proliferator-activated receptor gamma                               | PPARG                |
| P17612       | cAMP-dependent protein kinase catalytic subunit alpha                          | PRKACA               |
| P17252       | Protein kinase C alpha type                                                    | PRKCA                |
| P35354       | Prostaglandin G/H synthase 2                                                   | PTGS2                |
| P01375       | Tumor necrosis factor                                                          | TNF                  |
| P47989       | Xanthine dehydrogenase/oxidase                                                 | XDH                  |

Table S6. a total of 749 target predictions, probability &gt;0

| <b>Molecule</b> | <b>Target</b>                                    | <b>Common name</b> | <b>Uniprot ID</b> | <b>Probability</b> |
|-----------------|--------------------------------------------------|--------------------|-------------------|--------------------|
| quercetin       | NADPH oxidase 4                                  | NOX4               | Q9NPH5            | 1                  |
| quercetin       | Vasopressin V2 receptor                          | AVPR2              | P30518            | 1                  |
| quercetin       | Aldose reductase                                 | AKR1B1             | P15121            | 1                  |
| quercetin       | Xanthine dehydrogenase                           | XDH                | P47989            | 1                  |
| quercetin       | Monoamine oxidase A                              | MAOA               | P21397            | 1                  |
| quercetin       | Insulin-like growth factor I receptor            | IGF1R              | P08069            | 1                  |
| quercetin       | Tyrosine-protein kinase receptor FLT3            | FLT3               | P36888            | 1                  |
| quercetin       | Cytochrome P450 19A1                             | CYP19A1            | P11511            | 1                  |
| quercetin       | Epidermal growth factor receptor erbB1           | EGFR               | P00533            | 1                  |
| quercetin       | Thrombin                                         | F2                 | P00734            | 1                  |
| quercetin       | Carbonic anhydrase II                            | CA2                | P00918            | 1                  |
| quercetin       | Serine/threonine-protein kinase PIM1             | PIM1               | P11309            | 1                  |
| quercetin       | Arachidonate 5-lipoxygenase                      | ALOX5              | P09917            | 1                  |
| quercetin       | Serine/threonine-protein kinase<br>Aurora-B      | AURKB              | Q96GD4            | 1                  |
| quercetin       | Dopamine D4 receptor                             | DRD4               | P21917            | 1                  |
| quercetin       | Adenosine A1 receptor (by<br>homology)           | ADORA1             | P30542            | 1                  |
| quercetin       | Carbonic anhydrase VII                           | CA7                | P43166            | 1                  |
| quercetin       | Glyoxalase I                                     | GLO1               | Q04760            | 1                  |
| quercetin       | Myeloperoxidase                                  | MPO                | P05164            | 1                  |
| quercetin       | PI3-kinase p85-alpha subunit                     | PIK3R1             | P27986            | 1                  |
| quercetin       | Adenosine A2a receptor (by<br>homology)          | ADORA2A            | P29274            | 1                  |
| quercetin       | Death-associated protein kinase 1                | DAPK1              | P53355            | 1                  |
| quercetin       | Liver glycogen phosphorylase                     | PYGL               | P06737            | 1                  |
| quercetin       | Carbonic anhydrase I                             | CA1                | P00915            | 1                  |
| quercetin       | Glycogen synthase kinase-3 beta                  | GSK3B              | P49841            | 1                  |
| quercetin       | Tyrosine-protein kinase SRC                      | SRC                | P12931            | 1                  |
| quercetin       | Focal adhesion kinase 1                          | PTK2               | Q05397            | 1                  |
| quercetin       | Estradiol 17-beta-dehydrogenase 2                | HSD17B2            | P37059            | 1                  |
| quercetin       | Vascular endothelial growth factor<br>receptor 2 | KDR                | P35968            | 1                  |
| quercetin       | Matrix metalloproteinase 13                      | MMP13              | P45452            | 1                  |
| quercetin       | Matrix metalloproteinase 3                       | MMP3               | P08254            | 1                  |
| quercetin       | Carbonic anhydrase III                           | CA3                | P07451            | 1                  |
| quercetin       | Arachidonate 15-lipoxygenase                     | ALOX15             | P16050            | 1                  |
| quercetin       | Multidrug resistance-associated protein 1        | ABCC1              | P33527            | 1                  |
| quercetin       | Serine/threonine-protein kinase PLK1             | PLK1               | P53350            | 1                  |
| quercetin       | Carbonic anhydrase VI                            | CA6                | P23280            | 1                  |

|           |                                                      |         |        |             |
|-----------|------------------------------------------------------|---------|--------|-------------|
| quercetin | Cyclin-dependent kinase 1                            | CDK1    | P06493 | 1           |
| quercetin | Matrix metalloproteinase 9                           | MMP9    | P14780 | 1           |
| quercetin | Carbonic anhydrase XII                               | CA12    | O43570 | 1           |
| quercetin | Matrix metalloproteinase 2                           | MMP2    | P08253 | 1           |
| quercetin | Protein kinase N1                                    | PKN1    | Q16512 | 1           |
| quercetin | Carbonic anhydrase XIV                               | CA14    | Q9ULX7 | 1           |
| quercetin | Carbonic anhydrase IX                                | CA9     | Q16790 | 1           |
| quercetin | Casein kinase II alpha                               | CSNK2A1 | P68400 | 1           |
| quercetin | Arachidonate 12-lipoxygenase                         | ALOX12  | P18054 | 1           |
| quercetin | Hepatocyte growth factor receptor                    | MET     | P08581 | 1           |
| quercetin | Carbonic anhydrase IV                                | CA4     | P22748 | 1           |
| quercetin | Serine/threonine-protein kinase NEK2                 | NEK2    | P51955 | 1           |
| quercetin | Interleukin-8 receptor A                             | CXCR1   | P25024 | 1           |
| quercetin | CaM kinase II beta                                   | CAMK2B  | Q13554 | 1           |
| quercetin | ALK tyrosine kinase receptor                         | ALK     | Q9UM73 | 1           |
| quercetin | Serine/threonine-protein kinase AKT                  | AKT1    | P31749 | 1           |
| quercetin | P-glycoprotein 1                                     | ABCB1   | P08183 | 1           |
| quercetin | Serine/threonine-protein kinase NEK6                 | NEK6    | Q9HC98 | 1           |
| quercetin | Phospholipase A2 group 1B                            | PLA2G1B | P04054 | 1           |
| quercetin | Carbonic anhydrase VA                                | CA5A    | P35218 | 1           |
| quercetin | Beta-secretase 1                                     | BACE1   | P56817 | 1           |
| quercetin | Cytochrome P450 1B1                                  | CYP1B1  | Q16678 | 1           |
| quercetin | Tyrosine-protein kinase receptor UFO                 | AXL     | P30530 | 1           |
| quercetin | ATP-binding cassette sub-family G member 2           | ABCG2   | Q9UNQ0 | 1           |
| quercetin | NUAK family SNF1-like kinase 1                       | NUAK1   | O60285 | 1           |
| quercetin | Aldo-keto reductase family 1 member C2 (by homology) | AKR1C2  | P52895 | 1           |
| quercetin | Aldo-keto reductase family 1 member C1 (by homology) | AKR1C1  | Q04828 | 1           |
| quercetin | Aldo-keto-reductase family 1 member C3 (by homology) | AKR1C3  | P42330 | 1           |
| quercetin | Aldo-keto reductase family 1 member C4 (by homology) | AKR1C4  | P17516 | 1           |
| quercetin | Carbonic anhydrase XIII (by homology)                | CA13    | Q8NIQ1 | 1           |
| quercetin | Aldehyde reductase (by homology)                     | AKR1A1  | P14550 | 1           |
| quercetin | G-protein coupled receptor 35                        | GPR35   | Q9HC97 | 1           |
| quercetin | Microtubule-associated protein tau                   | MAPT    | P10636 | 0.680283592 |
| quercetin | Lysine-specific demethylase 4D-like                  | KDM4E   | B2RXH2 | 0.680283592 |
| quercetin | DNA topoisomerase II alpha                           | TOP2A   | P11388 | 0.680283592 |
| quercetin | Insulin receptor                                     | INSR    | P06213 | 0.680283592 |
| quercetin | Acetylcholinesterase                                 | ACHE    | P22303 | 0.680283592 |

|            |                                              |                           |                                   |             |
|------------|----------------------------------------------|---------------------------|-----------------------------------|-------------|
| quercetin  | Myosin light chain kinase, smooth muscle     | MYLK                      | Q15746                            | 0.680283592 |
| quercetin  | Tyrosine-protein kinase SYK                  | SYK                       | P43405                            | 0.680283592 |
| quercetin  | PI3-kinase p110-gamma subunit                | PIK3CG                    | P48736                            | 0.680283592 |
| quercetin  | DNA-(apurinic or apyrimidinic site) lyase    | APEX1                     | P27695                            | 0.680283592 |
| quercetin  | Receptor-type tyrosine-protein phosphatase S | PTPRS                     | Q13332                            | 0.545871745 |
| quercetin  | Estrogen receptor beta                       | ESR2                      | Q92731                            | 0.545871745 |
| quercetin  | DNA-3-methyladenine glycosylase              | MPG                       | P29372                            | 0.545871745 |
| quercetin  | Solute carrier family 22 member 12           | SLC22A12                  | Q96S37                            | 0.545871745 |
| quercetin  | Cyclin-dependent kinase 5/CDK5 activator 1   | CDK5R1 CDK5               | Q15078 Q00535                     | 0.538061807 |
| quercetin  | Cyclin-dependent kinase 1/cyclin B           | CCNB3 CDK1<br>CCNB1 CCNB2 | Q8WWL7<br>P06493 P14635<br>O95067 | 0.538061807 |
| quercetin  | Arginase-1 (by homology)                     | ARG1                      | P05089                            | 0.538061807 |
| quercetin  | Cyclin-dependent kinase 6                    | CDK6                      | Q00534                            | 0.49851319  |
| quercetin  | Cyclin-dependent kinase 2                    | CDK2                      | P24941                            | 0.49851319  |
| quercetin  | Tyrosinase                                   | TYR                       | P14679                            | 0.395895175 |
| quercetin  | Estradiol 17-beta-dehydrogenase 1            | HSD17B1                   | P14061                            | 0.395895175 |
| quercetin  | Aryl hydrocarbon receptor                    | AHR                       | P35869                            | 0.395895175 |
| quercetin  | Estrogen-related receptor alpha              | ESRRA                     | P11474                            | 0.395895175 |
| quercetin  | Beta amyloid A4 protein                      | APP                       | P05067                            | 0.261559713 |
| quercetin  | Poly [ADP-ribose] polymerase-1               | PARP1                     | P09874                            | 0.261559713 |
| quercetin  | Transthyretin                                | TTR                       | P02766                            | 0.261559713 |
| quercetin  | Matrix metalloproteinase 12                  | MMP12                     | P39900                            | 0.261559713 |
| quercetin  | Lymphocyte differentiation antigen CD38      | CD38                      | P28907                            | 0.261559713 |
| quercetin  | Aldo-keto reductase family 1 member B10      | AKR1B10                   | O60218                            | 0.261559713 |
| quercetin  | Tankyrase-2                                  | TNKS2                     | Q9H2K2                            | 0.261559713 |
| quercetin  | Tankyrase-1                                  | TNKS                      | O95271                            | 0.261559713 |
| quercetin  | DNA topoisomerase I (by homology)            | TOP1                      | P11387                            | 0.261559713 |
| quercetin  | Telomerase reverse transcriptase             | TERT                      | O14746                            | 0.198389229 |
| Kaempferol | NADPH oxidase 4                              | NOX4                      | Q9NPH5                            | 1           |
| Kaempferol | Aldose reductase (by homology)               | AKR1B1                    | P15121                            | 1           |
| Kaempferol | Xanthine dehydrogenase                       | XDH                       | P47989                            | 1           |
| Kaempferol | Tyrosinase                                   | TYR                       | P14679                            | 1           |
| Kaempferol | Tyrosine-protein kinase receptor FLT3        | FLT3                      | P36888                            | 1           |
| Kaempferol | Carbonic anhydrase II                        | CA2                       | P00918                            | 1           |
| Kaempferol | Arachidonate 5-lipoxygenase                  | ALOX5                     | P09917                            | 1           |
| Kaempferol | Carbonic anhydrase VII                       | CA7                       | P43166                            | 1           |

|            |                                              |                           |                                   |             |
|------------|----------------------------------------------|---------------------------|-----------------------------------|-------------|
| Kaempferol | Estradiol 17-beta-dehydrogenase 2            | HSD17B2                   | P37059                            | 1           |
| Kaempferol | Multidrug resistance-associated protein 1    | ABCC1                     | P33527                            | 1           |
| Kaempferol | Estradiol 17-beta-dehydrogenase 1            | HSD17B1                   | P14061                            | 1           |
| Kaempferol | Aryl hydrocarbon receptor                    | AHR                       | P35869                            | 1           |
| Kaempferol | Carbonic anhydrase XII                       | CA12                      | O43570                            | 1           |
| Kaempferol | Estrogen-related receptor alpha              | ESRRA                     | P11474                            | 1           |
| Kaempferol | P-glycoprotein 1                             | ABCB1                     | P08183                            | 1           |
| Kaempferol | Cytochrome P450 1B1                          | CYP1B1                    | Q16678                            | 1           |
| Kaempferol | ATP-binding cassette sub-family G member 2   | ABCG2                     | Q9UNQ0                            | 1           |
| Kaempferol | Adenosine A1 receptor (by homology)          | ADORA1                    | P30542                            | 0.795047263 |
| Kaempferol | Carbonic anhydrase IV                        | CA4                       | P22748                            | 0.795047263 |
| Kaempferol | Acetylcholinesterase                         | ACHE                      | P22303                            | 0.768469201 |
| Kaempferol | Monoamine oxidase A                          | MAOA                      | P21397                            | 0.658019738 |
| Kaempferol | Glyoxalase 1                                 | GLO1                      | Q04760                            | 0.658019738 |
| Kaempferol | Tyrosine-protein kinase SYK                  | SYK                       | P43405                            | 0.658019738 |
| Kaempferol | Glycogen synthase kinase-3 beta              | GSK3B                     | P49841                            | 0.658019738 |
| Kaempferol | Matrix metalloproteinase 9                   | MMP9                      | P14780                            | 0.658019738 |
| Kaempferol | Matrix metalloproteinase 2                   | MMP2                      | P08253                            | 0.658019738 |
| Kaempferol | Arachidonate 15-lipoxygenase                 | ALOX15                    | P16050                            | 0.64978075  |
| Kaempferol | Arachidonate 12-lipoxygenase                 | ALOX12                    | P18054                            | 0.633326262 |
| Kaempferol | Receptor-type tyrosine-protein phosphatase S | PTPRS                     | Q13332                            | 0.608446264 |
| Kaempferol | Adenosine A2a receptor (by homology)         | ADORA2A                   | P29274                            | 0.5673019   |
| Kaempferol | Cyclin-dependent kinase 5/CDK5 activator 1   | CDK5R1 CDK5               | Q15078 Q00535                     | 0.517921498 |
| Kaempferol | Cyclin-dependent kinase 1/cyclin B           | CCNB3 CDK1<br>CCNB1 CCNB2 | Q8WWL7<br>P06493 P14635<br>O95067 | 0.517921498 |
| Kaempferol | Arginase-1 (by homology)                     | ARG1                      | P05089                            | 0.517921498 |
| Kaempferol | G-protein coupled receptor 35                | GPR35                     | Q9HC97                            | 0.501530018 |
| Kaempferol | Estrogen receptor beta                       | ESR2                      | Q92731                            | 0.501530018 |
| Kaempferol | Death-associated protein kinase 1            | DAPK1                     | P53355                            | 0.501530018 |
| Kaempferol | DNA-3-methyladenine glycosylase              | MPG                       | P29372                            | 0.501530018 |
| Kaempferol | Solute carrier family 22 member 12           | SLC22A12                  | Q96S37                            | 0.501530018 |
| Kaempferol | Transthyretin                                | TTR                       | P02766                            | 0.484896363 |
| Kaempferol | Aldo-keto reductase family 1 member B10      | AKR1B10                   | O60218                            | 0.484896363 |
| Kaempferol | Tankyrase-2                                  | TNKS2                     | Q9H2K2                            | 0.484896363 |
| Kaempferol | Tankyrase-1                                  | TNKS                      | O95271                            | 0.484896363 |
| Kaempferol | Cyclin-dependent kinase 6                    | CDK6                      | Q00534                            | 0.476835618 |

|            |                                                         |         |        |             |
|------------|---------------------------------------------------------|---------|--------|-------------|
| Kaempferol | Cyclin-dependent kinase 2                               | CDK2    | P24941 | 0.476835618 |
| Kaempferol | Cytochrome P450 19A1                                    | CYP19A1 | P11511 | 0.427205275 |
| Kaempferol | Casein kinase II alpha                                  | CSNK2A1 | P68400 | 0.427205275 |
| Kaempferol | Epidermal growth factor receptor erbB1                  | EGFR    | P00533 | 0.40264338  |
| Kaempferol | Vasopressin V2 receptor                                 | AVPR2   | P30518 | 0.40264338  |
| Kaempferol | Insulin-like growth factor I receptor                   | IGF1R   | P08069 | 0.40264338  |
| Kaempferol | Thrombin                                                | F2      | P00734 | 0.40264338  |
| Kaempferol | Serine/threonine-protein kinase PIM1                    | PIM1    | P11309 | 0.40264338  |
| Kaempferol | Serine/threonine-protein kinase<br>Aurora-B             | AURKB   | Q96GD4 | 0.40264338  |
| Kaempferol | Dopamine D4 receptor                                    | DRD4    | P21917 | 0.40264338  |
| Kaempferol | Myeloperoxidase                                         | MPO     | P05164 | 0.40264338  |
| Kaempferol | PI3-kinase p85-alpha subunit                            | PIK3R1  | P27986 | 0.40264338  |
| Kaempferol | Liver glycogen phosphorylase                            | PYGL    | P06737 | 0.40264338  |
| Kaempferol | Carbonic anhydrase I                                    | CA1     | P00915 | 0.40264338  |
| Kaempferol | Tyrosine-protein kinase SRC                             | SRC     | P12931 | 0.40264338  |
| Kaempferol | Focal adhesion kinase 1                                 | PTK2    | Q05397 | 0.40264338  |
| Kaempferol | Vascular endothelial growth factor<br>receptor 2        | KDR     | P35968 | 0.40264338  |
| Kaempferol | Matrix metalloproteinase 13                             | MMP13   | P45452 | 0.40264338  |
| Kaempferol | Matrix metalloproteinase 3                              | MMP3    | P08254 | 0.40264338  |
| Kaempferol | Carbonic anhydrase III                                  | CA3     | P07451 | 0.40264338  |
| Kaempferol | Serine/threonine-protein kinase PLK1                    | PLK1    | P53350 | 0.40264338  |
| Kaempferol | Carbonic anhydrase VI                                   | CA6     | P23280 | 0.40264338  |
| Kaempferol | Cyclin-dependent kinase 1                               | CDK1    | P06493 | 0.40264338  |
| Kaempferol | Protein kinase N1                                       | PKN1    | Q16512 | 0.40264338  |
| Kaempferol | Carbonic anhydrase XIV                                  | CA14    | Q9ULX7 | 0.40264338  |
| Kaempferol | Carbonic anhydrase IX                                   | CA9     | Q16790 | 0.40264338  |
| Kaempferol | Hepatocyte growth factor receptor                       | MET     | P08581 | 0.40264338  |
| Kaempferol | Serine/threonine-protein kinase NEK2                    | NEK2    | P51955 | 0.40264338  |
| Kaempferol | Interleukin-8 receptor A                                | CXCR1   | P25024 | 0.40264338  |
| Kaempferol | CaM kinase II beta                                      | CAMK2B  | Q13554 | 0.40264338  |
| Kaempferol | ALK tyrosine kinase receptor                            | ALK     | Q9UM73 | 0.40264338  |
| Kaempferol | Serine/threonine-protein kinase AKT                     | AKT1    | P31749 | 0.40264338  |
| Kaempferol | Serine/threonine-protein kinase NEK6                    | NEK6    | Q9HC98 | 0.40264338  |
| Kaempferol | Phospholipase A2 group 1B                               | PLA2G1B | P04054 | 0.40264338  |
| Kaempferol | Carbonic anhydrase VA                                   | CA5A    | P35218 | 0.40264338  |
| Kaempferol | Beta-secretase 1                                        | BACE1   | P56817 | 0.40264338  |
| Kaempferol | Tyrosine-protein kinase receptor UFO                    | AXL     | P30530 | 0.40264338  |
| Kaempferol | NUAK family SNF1-like kinase 1                          | NUAK1   | O60285 | 0.40264338  |
| Kaempferol | Aldo-keto reductase family 1 member<br>C2 (by homology) | AKR1C2  | P52895 | 0.40264338  |
| Kaempferol | Aldo-keto reductase family 1 member                     | AKR1C1  | Q04828 | 0.40264338  |

|            |                                                            |                           |                                   |             |
|------------|------------------------------------------------------------|---------------------------|-----------------------------------|-------------|
|            | C1 (by homology)                                           |                           |                                   |             |
| Kaempferol | Aldo-keto-reductase family 1 member<br>C3 (by homology)    | AKR1C3                    | P42330                            | 0.40264338  |
| Kaempferol | Aldo-keto reductase family 1 member<br>C4 (by homology)    | AKR1C4                    | P17516                            | 0.40264338  |
| Kaempferol | Carbonic anhydrase XIII (by<br>homology)                   | CA13                      | Q8NIQ1                            | 0.40264338  |
| Kaempferol | Aldehyde reductase (by homology)                           | AKR1A1                    | P14550                            | 0.40264338  |
| Kaempferol | Beta amyloid A4 protein                                    | APP                       | P05067                            | 0.295453305 |
| Kaempferol | Poly [ADP-ribose] polymerase-1                             | PARP1                     | P09874                            | 0.295453305 |
| Kaempferol | Matrix metalloproteinase 12                                | MMP12                     | P39900                            | 0.295453305 |
| Kaempferol | Lymphocyte differentiation antigen<br>CD38                 | CD38                      | P28907                            | 0.295453305 |
| Kaempferol | DNA topoisomerase I (by homology)                          | TOP1                      | P11387                            | 0.295453305 |
| Kaempferol | Estrogen receptor alpha                                    | ESR1                      | P03372                            | 0.270836923 |
| Kaempferol | Cyclooxygenase-2                                           | PTGS2                     | P35354                            | 0.270836923 |
| Kaempferol | Cystic fibrosis transmembrane<br>conductance regulator     | CFTR                      | P13569                            | 0.270836923 |
| Kaempferol | 6-phosphofructo-2-kinase/fructose-2,6-bi<br>sphosphatase 3 | PFKFB3                    | Q16875                            | 0.262581506 |
| Kaempferol | AMY1C                                                      | AMY1A                     | P04745                            | 0.237885168 |
| Kaempferol | G protein-coupled receptor kinase 6                        | GRK6                      | P43250                            | 0.237885168 |
| Kaempferol | Telomerase reverse transcriptase                           | TERT                      | O14746                            | 0.229685699 |
| Kaempferol | Microtubule-associated protein tau                         | MAPT                      | P10636                            | 0.171978589 |
| Luteolin   | NADPH oxidase 4                                            | NOX4                      | Q9NPH5                            | 1           |
| Luteolin   | Aldose reductase                                           | AKR1B1                    | P15121                            | 1           |
| Luteolin   | Cyclin-dependent kinase 5/CDK5<br>activator 1              | CDK5R1 CDK5               | Q15078 Q00535                     | 1           |
| Luteolin   | Xanthine dehydrogenase                                     | XDH                       | P47989                            | 1           |
| Luteolin   | Monoamine oxidase A                                        | MAOA                      | P21397                            | 1           |
| Luteolin   | Tyrosine-protein kinase receptor FLT3                      | FLT3                      | P36888                            | 1           |
| Luteolin   | Carbonic anhydrase II                                      | CA2                       | P00918                            | 1           |
| Luteolin   | Cyclin-dependent kinase 1/cyclin B                         | CCNB3 CDK1<br>CCNB1 CCNB2 | Q8WWL7<br>P06493 P14635<br>O95067 | 1           |
| Luteolin   | Arachidonate 5-lipoxygenase                                | ALOX5                     | P09917                            | 1           |
| Luteolin   | Adenosine A1 receptor (by<br>homology)                     | ADORA1                    | P30542                            | 1           |
| Luteolin   | Carbonic anhydrase VII                                     | CA7                       | P43166                            | 1           |
| Luteolin   | Glyoxalase I                                               | GLO1                      | Q04760                            | 1           |
| Luteolin   | Beta amyloid A4 protein                                    | APP                       | P05067                            | 1           |
| Luteolin   | Tyrosine-protein kinase SYK                                | SYK                       | P43405                            | 1           |
| Luteolin   | Glycogen synthase kinase-3 beta                            | GSK3B                     | P49841                            | 1           |



|          |                                                        |         |        |             |
|----------|--------------------------------------------------------|---------|--------|-------------|
| Luteolin | Poly [ADP-ribose] polymerase-1                         | PARP1   | P09874 | 1           |
| Luteolin | Transthyretin                                          | TTR     | P02766 | 1           |
| Luteolin | Matrix metalloproteinase 9                             | MMP9    | P14780 | 1           |
| Luteolin | Carbonic anhydrase XII                                 | CA12    | O43570 | 1           |
| Luteolin | Matrix metalloproteinase 2                             | MMP2    | P08253 | 1           |
| Luteolin | Carbonic anhydrase IV                                  | CA4     | P22748 | 1           |
| Luteolin | Matrix metalloproteinase 12                            | MMP12   | P39900 | 1           |
| Luteolin | Lymphocyte differentiation antigen<br>CD38             | CD38    | P28907 | 1           |
| Luteolin | Cytochrome P450 1B1                                    | CYP1B1  | Q16678 | 1           |
| Luteolin | ATP-binding cassette sub-family G<br>member 2          | ABCG2   | Q9UNQ0 | 1           |
| Luteolin | Aldo-keto reductase family 1 member<br>B10             | AKR1B10 | O60218 | 1           |
| Luteolin | Tankyrase-2                                            | TNKS2   | Q9H2K2 | 1           |
| Luteolin | Tankyrase-1                                            | TNKS    | O95271 | 1           |
| Luteolin | DNA topoisomerase I (by homology)                      | TOP1    | P11387 | 1           |
| Luteolin | Arginase-1 (by homology)                               | ARG1    | P05089 | 1           |
| Luteolin | Receptor-type tyrosine-protein<br>phosphatase S        | PTPRS   | Q13332 | 0.857022738 |
| Luteolin | Multidrug resistance-associated protein 1              | ABCC1   | P33527 | 0.658019738 |
| Luteolin | Estradiol 17-beta-dehydrogenase 1                      | HSD17B1 | P14061 | 0.658019738 |
| Luteolin | Acetylcholinesterase                                   | ACHE    | P22303 | 0.6004118   |
| Luteolin | Cyclin-dependent kinase 6                              | CDK6    | Q00534 | 0.6004118   |
| Luteolin | P-glycoprotein 1                                       | ABCB1   | P08183 | 0.534504957 |
| Luteolin | Estradiol 17-beta-dehydrogenase 2                      | HSD17B2 | P37059 | 0.468552736 |
| Luteolin | Cytochrome P450 19A1                                   | CYP19A1 | P11511 | 0.460288742 |
| Luteolin | Estrogen receptor beta                                 | ESR2    | Q92731 | 0.460288742 |
| Luteolin | Adenosine A2a receptor (by<br>homology)                | ADORA2A | P29274 | 0.460288742 |
| Luteolin | Casein kinase II alpha                                 | CSNK2A1 | P68400 | 0.460288742 |
| Luteolin | Arachidonate 15-lipoxygenase                           | ALOX15  | P16050 | 0.435520295 |
| Luteolin | Arachidonate 12-lipoxygenase                           | ALOX12  | P18054 | 0.435520295 |
| Luteolin | Estrogen receptor alpha                                | ESR1    | P03372 | 0.386211984 |
| Luteolin | Cyclooxygenase-2                                       | PTGS2   | P35354 | 0.386211984 |
| Luteolin | Cystic fibrosis transmembrane<br>conductance regulator | CFTR    | P13569 | 0.386211984 |
| Luteolin | AMY1C                                                  | AMY1A   | P04745 | 0.361228277 |
| Luteolin | G protein-coupled receptor kinase 6                    | GRK6    | P43250 | 0.361228277 |
| Luteolin | Carbonic anhydrase I                                   | CA1     | P00915 | 0.336739633 |
| Luteolin | Carbonic anhydrase IX                                  | CA9     | Q16790 | 0.336739633 |
| Luteolin | Cyclin-dependent kinase 2                              | CDK2    | P24941 | 0.328395696 |
| Luteolin | Telomerase reverse transcriptase                       | TERT    | O14746 | 0.320218721 |

|          |                                                         |         |        |             |
|----------|---------------------------------------------------------|---------|--------|-------------|
| Luteolin | Cyclin-dependent kinase 1                               | CDK1    | P06493 | 0.303816095 |
| Luteolin | Tyrosinase                                              | TYR     | P14679 | 0.287307298 |
| Luteolin | Aryl hydrocarbon receptor                               | AHR     | P35869 | 0.287307298 |
| Luteolin | Estrogen-related receptor alpha                         | ESRRA   | P11474 | 0.287307298 |
| Luteolin | G-protein coupled receptor 35                           | GPR35   | Q9HC97 | 0.279037062 |
| Luteolin | Vasopressin V2 receptor                                 | AVPR2   | P30518 | 0.279037062 |
| Luteolin | Insulin-like growth factor I receptor                   | IGF1R   | P08069 | 0.279037062 |
| Luteolin | Epidermal growth factor receptor erbB1                  | EGFR    | P00533 | 0.279037062 |
| Luteolin | Thrombin                                                | F2      | P00734 | 0.279037062 |
| Luteolin | Serine/threonine-protein kinase PIM1                    | PIM1    | P11309 | 0.279037062 |
| Luteolin | Serine/threonine-protein kinase<br>Aurora-B             | AURKB   | Q96GD4 | 0.279037062 |
| Luteolin | Dopamine D4 receptor                                    | DRD4    | P21917 | 0.279037062 |
| Luteolin | Myeloperoxidase                                         | MPO     | P05164 | 0.279037062 |
| Luteolin | PI3-kinase p85-alpha subunit                            | PIK3R1  | P27986 | 0.279037062 |
| Luteolin | Death-associated protein kinase 1                       | DAPK1   | P53355 | 0.279037062 |
| Luteolin | Liver glycogen phosphorylase                            | PYGL    | P06737 | 0.279037062 |
| Luteolin | Tyrosine-protein kinase SRC                             | SRC     | P12931 | 0.279037062 |
| Luteolin | Focal adhesion kinase 1                                 | PTK2    | Q05397 | 0.279037062 |
| Luteolin | Vascular endothelial growth factor<br>receptor 2        | KDR     | P35968 | 0.279037062 |
| Luteolin | Matrix metalloproteinase 13                             | MMP13   | P45452 | 0.279037062 |
| Luteolin | Matrix metalloproteinase 3                              | MMP3    | P08254 | 0.279037062 |
| Luteolin | Carbonic anhydrase III                                  | CA3     | P07451 | 0.279037062 |
| Luteolin | Serine/threonine-protein kinase PLK1                    | PLK1    | P53350 | 0.279037062 |
| Luteolin | Carbonic anhydrase VI                                   | CA6     | P23280 | 0.279037062 |
| Luteolin | Protein kinase N1                                       | PKN1    | Q16512 | 0.279037062 |
| Luteolin | Carbonic anhydrase XIV                                  | CA14    | Q9ULX7 | 0.279037062 |
| Luteolin | Hepatocyte growth factor receptor                       | MET     | P08581 | 0.279037062 |
| Luteolin | Serine/threonine-protein kinase NEK2                    | NEK2    | P51955 | 0.279037062 |
| Luteolin | Interleukin-8 receptor A                                | CXCR1   | P25024 | 0.279037062 |
| Luteolin | CaM kinase II beta                                      | CAMK2B  | Q13554 | 0.279037062 |
| Luteolin | ALK tyrosine kinase receptor                            | ALK     | Q9UM73 | 0.279037062 |
| Luteolin | Serine/threonine-protein kinase AKT                     | AKT1    | P31749 | 0.279037062 |
| Luteolin | Serine/threonine-protein kinase NEK6                    | NEK6    | Q9HC98 | 0.279037062 |
| Luteolin | Phospholipase A2 group 1B                               | PLA2G1B | P04054 | 0.279037062 |
| Luteolin | Carbonic anhydrase VA                                   | CA5A    | P35218 | 0.279037062 |
| Luteolin | Beta-secretase 1                                        | BACE1   | P56817 | 0.279037062 |
| Luteolin | Tyrosine-protein kinase receptor UFO                    | AXL     | P30530 | 0.279037062 |
| Luteolin | NUAK family SNF1-like kinase 1                          | NUAK1   | O60285 | 0.279037062 |
| Luteolin | Aldo-keto reductase family 1 member<br>C2 (by homology) | AKR1C2  | P52895 | 0.279037062 |
| Luteolin | Aldo-keto reductase family 1 member                     | AKR1C1  | Q04828 | 0.279037062 |

|                     |                                                            |         |        |             |
|---------------------|------------------------------------------------------------|---------|--------|-------------|
|                     | C1 (by homology)                                           |         |        |             |
| Luteolin            | Aldo-keto-reductase family 1 member<br>C3 (by homology)    | AKR1C3  | P42330 | 0.279037062 |
| Luteolin            | Aldo-keto reductase family 1 member<br>C4 (by homology)    | AKR1C4  | P17516 | 0.279037062 |
| Luteolin            | Carbonic anhydrase XIII (by<br>homology)                   | CA13    | Q8NIQ1 | 0.279037062 |
| Luteolin            | Aldehyde reductase (by homology)                           | AKR1A1  | P14550 | 0.279037062 |
| Luteolin            | 6-phosphofructo-2-kinase/fructose-2,6-bi<br>sphosphatase 3 | PFKFB3  | Q16875 | 0.147256737 |
| Luteolin            | Plasminogen                                                | PLG     | P00747 | 0.147256737 |
| Luteolin            | Lysine-specific demethylase 4D-like                        | KDM4E   | B2RXH2 | 0.147256737 |
| Luteolin            | Androgen Receptor                                          | AR      | P10275 | 0.139061947 |
| Beta-Sitoster<br>ol | HMG-CoA reductase                                          | HMGCR   | P04035 | 0.680955494 |
| Beta-Sitoster<br>ol | Cytochrome P450 51 (by homology)                           | CYP51A1 | Q16850 | 0.680955494 |
| Beta-Sitoster<br>ol | Androgen Receptor                                          | AR      | P10275 | 0.656003572 |
| Beta-Sitoster<br>ol | Niemann-Pick C1-like protein 1                             | NPC1L1  | Q9UHC9 | 0.647646922 |
| Beta-Sitoster<br>ol | LXR-alpha                                                  | NR1H3   | Q13133 | 0.622655937 |
| Beta-Sitoster<br>ol | Cytochrome P450 17A1                                       | CYP17A1 | P05093 | 0.506040802 |
| Beta-Sitoster<br>ol | Nuclear receptor ROR-gamma                                 | RORC    | P51449 | 0.431038563 |
| Beta-Sitoster<br>ol | Cytochrome P450 19A1                                       | CYP19A1 | P11511 | 0.314405075 |
| Beta-Sitoster<br>ol | Estrogen receptor beta                                     | ESR2    | Q92731 | 0.306043655 |
| Beta-Sitoster<br>ol | Estrogen receptor alpha                                    | ESR1    | P03372 | 0.222798333 |
| Beta-Sitoster<br>ol | Testis-specific androgen-binding protein                   | SHBG    | P04278 | 0.189458322 |
| Beta-Sitoster<br>ol | Sterol regulatory element-binding<br>protein 2             | SREBF2  | Q12772 | 0.172809876 |
| Beta-Sitoster<br>ol | Cytochrome P450 2C19                                       | CYP2C19 | P33261 | 0.131155749 |
| Beta-Sitoster<br>ol | Norepinephrine transporter                                 | SLC6A2  | P23975 | 0.12282732  |
| Beta-Sitoster<br>ol | Butyrylcholinesterase                                      | BCHE    | P06276 | 0.12282732  |

|                 |                                                             |          |        |             |
|-----------------|-------------------------------------------------------------|----------|--------|-------------|
| Beta-Sitosterol | Nuclear receptor ROR-alpha                                  | RORA     | P35398 | 0.12282732  |
| Beta-Sitosterol | Protein-tyrosine phosphatase 1B                             | PTPN1    | P18031 | 0.12282732  |
| Beta-Sitosterol | Corticosteroid binding globulin                             | SERPINA6 | P08185 | 0.11449479  |
| Beta-Sitosterol | Serotonin transporter                                       | SLC6A4   | P31645 | 0.106165761 |
| Beta-Sitosterol | Glucose-6-phosphate 1-dehydrogenase                         | G6PD     | P11413 | 0.106165761 |
| Beta-Sitosterol | Nuclear receptor subfamily 1 group I member 3 (by homology) | NR1I3    | Q14994 | 0.106165761 |
| Beta-Sitosterol | Muscarinic acetylcholine receptor M2                        | CHRM2    | P08172 | 0.106165761 |
| Beta-Sitosterol | Acetylcholinesterase                                        | ACHE     | P22303 | 0.106165761 |
| Beta-Sitosterol | Vitamin D receptor                                          | VDR      | P11473 | 0.106165761 |
| Beta-Sitosterol | Carboxylesterase 2                                          | CES2     | O00748 | 0.106165761 |
| Beta-Sitosterol | LXR-beta                                                    | NR1H2    | P55055 | 0.106165761 |
| Beta-Sitosterol | Dual specificity phosphatase Cdc25A                         | CDC25A   | P30304 | 0.106165761 |
| Beta-Sitosterol | Prostanoid EP1 receptor (by homology)                       | PTGER1   | P34995 | 0.106165761 |
| Beta-Sitosterol | Prostanoid EP2 receptor (by homology)                       | PTGER2   | P43116 | 0.106165761 |
| Beta-Sitosterol | 11-beta-hydroxysteroid dehydrogenase 1                      | HSD11B1  | P28845 | 0.106165761 |
| Beta-Sitosterol | Anti-estrogen binding site (AEBS) (by homology)             | DHCR7    | Q9UBM7 | 0.106165761 |
| Beta-Sitosterol | Glycine receptor subunit alpha-1                            | GLRA1    | P23415 | 0.106165761 |
| Beta-Sitosterol | Peroxisome proliferator-activated receptor delta            | PPARD    | Q03181 | 0.106165761 |
| Beta-Sitosterol | Squalene monooxygenase                                      | SQLE     | Q14534 | 0.106165761 |
| Beta-Sitosterol | Protein-tyrosine phosphatase 1C                             | PTPN6    | P29350 | 0.106165761 |
| Beta-Sitosterol | Squalene synthetase (by homology)                           | FDFT1    | P37268 | 0.106165761 |
| Beta-Sitosterol | Nitric oxide synthase, inducible (by homology)              | NOS2     | P35228 | 0.106165761 |

|                 |                                                         |          |        |             |
|-----------------|---------------------------------------------------------|----------|--------|-------------|
| Beta-Sitosterol | Glucocorticoid receptor                                 | NR3C1    | P04150 | 0.106165761 |
| Beta-Sitosterol | Dual specificity phosphatase Cdc25B                     | CDC25B   | P30305 | 0.106165761 |
| Beta-Sitosterol | Sonic hedgehog protein (by homology)                    | SHH      | Q15465 | 0.106165761 |
| Beta-Sitosterol | UDP-glucuronosyltransferase 2B7                         | UGT2B7   | P16662 | 0.106165761 |
| Beta-Sitosterol | 11-beta-hydroxysteroid dehydrogenase 2                  | HSD11B2  | P80365 | 0.106165761 |
| Beta-Sitosterol | Dopamine D2 receptor                                    | DRD2     | P14416 | 0.106165761 |
| Beta-Sitosterol | DNA polymerase beta (by homology)                       | POLB     | P06746 | 0.106165761 |
| Wogonin         | Cyclooxygenase-2 (by homology)                          | PTGS2    | P35354 | 1           |
| Wogonin         | Nitric oxide synthase, inducible (by homology)          | NOS2     | P35228 | 1           |
| Wogonin         | Tyrosine-protein kinase receptor FLT3                   | FLT3     | P36888 | 0.246150751 |
| Wogonin         | Aldose reductase                                        | AKR1B1   | P15121 | 0.229685699 |
| Wogonin         | Delta opioid receptor                                   | OPRD1    | P41143 | 0.139061947 |
| Wogonin         | Stem cell growth factor receptor                        | KIT      | P10721 | 0.130791955 |
| Wogonin         | P-glycoprotein 1                                        | ABCB1    | P08183 | 0.130791955 |
| Wogonin         | Inhibitor of nuclear factor kappa B kinase beta subunit | IKBKB    | O14920 | 0.122581769 |
| Wogonin         | Neurotrophic tyrosine kinase receptor type 2            | NTRK2    | Q16620 | 0.122581769 |
| Wogonin         | Lysine-specific demethylase 4D-like                     | KDM4E    | B2RXH2 | 0.106099949 |
| Wogonin         | Xanthine dehydrogenase                                  | XDH      | P47989 | 0.106099949 |
| Wogonin         | Arachidonate 15-lipoxygenase                            | ALOX15   | P16050 | 0.106099949 |
| Wogonin         | Cyclin-dependent kinase 1                               | CDK1     | P06493 | 0.106099949 |
| Wogonin         | Arachidonate 12-lipoxygenase                            | ALOX12   | P18054 | 0.106099949 |
| Wogonin         | G protein-coupled receptor kinase 6                     | GRK6     | P43250 | 0.106099949 |
| Wogonin         | Cytochrome P450 19A1                                    | CYP19A1  | P11511 | 0.106099949 |
| Wogonin         | Estrogen receptor beta                                  | ESR2     | Q92731 | 0.106099949 |
| Wogonin         | Cytochrome P450 1A1                                     | CYP1A1   | P04798 | 0.106099949 |
| Wogonin         | Mu opioid receptor                                      | OPRM1    | P35372 | 0.106099949 |
| Wogonin         | ATP-binding cassette sub-family G member 2              | ABCG2    | Q9UNQ0 | 0.106099949 |
| Wogonin         | Estrogen receptor alpha                                 | ESR1     | P03372 | 0.106099949 |
| Wogonin         | Epidermal growth factor receptor erbB1                  | EGFR     | P00533 | 0.106099949 |
| Wogonin         | Solute carrier family 22 member 12                      | SLC22A12 | Q96S37 | 0.106099949 |
| Wogonin         | Cytochrome P450 1B1                                     | CYP1B1   | Q16678 | 0.106099949 |
| Wogonin         | Carbonic anhydrase IV                                   | CA4      | P22748 | 0.106099949 |

|         |                                                             |                           |                                   |             |
|---------|-------------------------------------------------------------|---------------------------|-----------------------------------|-------------|
| Wogonin | Carbonic anhydrase II                                       | CA2                       | P00918                            | 0.097874534 |
| Wogonin | Carbonic anhydrase I                                        | CA1                       | P00915                            | 0.097874534 |
| Wogonin | Induced myeloid leukemia cell differentiation protein Mcl-1 | MCL1                      | Q07820                            | 0.097874534 |
| Wogonin | PI3-kinase p110-gamma subunit                               | PIK3CG                    | P48736                            | 0.097874534 |
| Wogonin | Serine/threonine-protein kinase PIM1                        | PIM1                      | P11309                            | 0.097874534 |
| Wogonin | Adenosine A1 receptor (by homology)                         | ADORA1                    | P30542                            | 0.097874534 |
| Wogonin | Adenosine A2a receptor (by homology)                        | ADORA2A                   | P29274                            | 0.097874534 |
| Wogonin | Estradiol 17-beta-dehydrogenase 2                           | HSD17B2                   | P37059                            | 0.097874534 |
| Wogonin | Estradiol 17-beta-dehydrogenase 1                           | HSD17B1                   | P14061                            | 0.097874534 |
| Wogonin | Carbonic anhydrase VII                                      | CA7                       | P43166                            | 0.097874534 |
| Wogonin | Carbonic anhydrase XII                                      | CA12                      | O43570                            | 0.097874534 |
| Wogonin | Cyclin-dependent kinase 5/CDK5 activator 1                  | CDK5R1 CDK5               | Q15078 Q00535                     | 0.097874534 |
| Wogonin | Cyclin-dependent kinase 1/cyclin B                          | CCNB3 CDK1<br>CCNB1 CCNB2 | Q8WWL7<br>P06493 P14635<br>O95067 | 0.097874534 |
| Wogonin | Cyclin-dependent kinase 6                                   | CDK6                      | Q00534                            | 0.097874534 |
| Wogonin | Carbonic anhydrase IX                                       | CA9                       | Q16790                            | 0.097874534 |
| Wogonin | Carbonyl reductase [NADPH] 1                                | CBR1                      | P16152                            | 0.097874534 |
| Wogonin | Telomerase reverse transcriptase                            | TERT                      | O14746                            | 0.097874534 |
| Wogonin | Androgen Receptor                                           | AR                        | P10275                            | 0.097874534 |
| Wogonin | Carbonic anhydrase VI                                       | CA6                       | P23280                            | 0.097874534 |
| Wogonin | Receptor-type tyrosine-protein phosphatase S                | PTPRS                     | Q13332                            | 0.097874534 |
| Wogonin | Death-associated protein kinase 1                           | DAPK1                     | P53355                            | 0.097874534 |
| Wogonin | DNA-3-methyladenine glycosylase                             | MPG                       | P29372                            | 0.097874534 |
| Wogonin | 6-phosphofructo-2-kinase/fructose-2,6-bisphosphatase 3      | PFKFB3                    | Q16875                            | 0.097874534 |
| Wogonin | Matrix metalloproteinase 9                                  | MMP9                      | P14780                            | 0.097874534 |
| Wogonin | Matrix metalloproteinase 2                                  | MMP2                      | P08253                            | 0.097874534 |
| Wogonin | Tyrosine-protein kinase LCK                                 | LCK                       | P06239                            | 0.097874534 |
| Wogonin | Matrix metalloproteinase 12                                 | MMP12                     | P39900                            | 0.097874534 |
| Wogonin | Lymphocyte differentiation antigen CD38                     | CD38                      | P28907                            | 0.097874534 |
| Wogonin | DNA topoisomerase I (by homology)                           | TOP1                      | P11387                            | 0.097874534 |
| Wogonin | Arginase-1 (by homology)                                    | ARG1                      | P05089                            | 0.097874534 |
| Wogonin | Microtubule-associated protein tau                          | MAPT                      | P10636                            | 0.097874534 |
| Wogonin | DNA topoisomerase II alpha                                  | TOP2A                     | P11388                            | 0.097874534 |
| Wogonin | Insulin receptor                                            | INSR                      | P06213                            | 0.097874534 |
| Wogonin | Dopamine D4 receptor                                        | DRD4                      | P21917                            | 0.097874534 |

|         |                                                      |          |        |             |
|---------|------------------------------------------------------|----------|--------|-------------|
| Wogonin | Myosin light chain kinase, smooth muscle             | MYLK     | Q15746 | 0.097874534 |
| Wogonin | Myeloperoxidase                                      | MPO      | P05164 | 0.097874534 |
| Wogonin | PI3-kinase p85-alpha subunit                         | PIK3R1   | P27986 | 0.097874534 |
| Wogonin | Liver glycogen phosphorylase                         | PYGL     | P06737 | 0.097874534 |
| Wogonin | Matrix metalloproteinase 13                          | MMP13    | P45452 | 0.097874534 |
| Wogonin | Matrix metalloproteinase 3                           | MMP3     | P08254 | 0.097874534 |
| Wogonin | Carbonic anhydrase III                               | CA3      | P07451 | 0.097874534 |
| Wogonin | Carbonic anhydrase XIV                               | CA14     | Q9ULX7 | 0.097874534 |
| Wogonin | Hepatocyte growth factor receptor                    | MET      | P08581 | 0.097874534 |
| Wogonin | Carbonic anhydrase XIII (by homology)                | CA13     | Q8N1Q1 | 0.097874534 |
| Wogonin | CaM kinase II beta                                   | CAMK2B   | Q13554 | 0.097874534 |
| Wogonin | Phospholipase A2 group 1B                            | PLA2G1B  | P04054 | 0.097874534 |
| Wogonin | Carbonic anhydrase VA                                | CA5A     | P35218 | 0.097874534 |
| Wogonin | DNA-(apurinic or apyrimidinic site) lyase            | APEX1    | P27695 | 0.097874534 |
| Wogonin | Aldo-keto reductase family 1 member C2 (by homology) | AKR1C2   | P52895 | 0.097874534 |
| Wogonin | Aldo-keto reductase family 1 member C1 (by homology) | AKR1C1   | Q04828 | 0.097874534 |
| Wogonin | Aldo-keto-reductase family 1 member C3 (by homology) | AKR1C3   | P42330 | 0.097874534 |
| Wogonin | Aldo-keto reductase family 1 member C4 (by homology) | AKR1C4   | P17516 | 0.097874534 |
| Wogonin | Aldehyde reductase (by homology)                     | AKR1A1   | P14550 | 0.097874534 |
| Wogonin | G-protein coupled receptor 35                        | GPR35    | Q9HC97 | 0.097874534 |
| Wogonin | Ornithine decarboxylase                              | ODC1     | P11926 | 0.097874534 |
| Wogonin | Heat shock protein HSP 90-alpha                      | HSP90AA1 | P07900 | 0.097874534 |
| Wogonin | Arachidonate 5-lipoxygenase                          | ALOX5    | P09917 | 0.097874534 |
| Wogonin | Interleukin-8 receptor A                             | CXCR1    | P25024 | 0.097874534 |
| Wogonin | Phospholipase A2 group IIA                           | PLA2G2A  | P14555 | 0.097874534 |
| Wogonin | Tyrosine-protein kinase SRC                          | SRC      | P12931 | 0.097874534 |
| Wogonin | Beta amyloid A4 protein                              | APP      | P05067 | 0.097874534 |
| Wogonin | Cytochrome P450 1A2                                  | CYP1A2   | P05177 | 0.097874534 |
| Wogonin | Adenosine A3 receptor                                | ADORA3   | P0DMS8 | 0.097874534 |
| Wogonin | Endoplasmic                                          | HSP90B1  | P14625 | 0.097874534 |
| Wogonin | Multidrug resistance-associated protein 1            | ABCC1    | P33527 | 0.097874534 |
| Wogonin | Tankyrase-1                                          | TNKS     | O95271 | 0.097874534 |
| Wogonin | Transthyretin                                        | TTR      | P02766 | 0.097874534 |
| Wogonin | NADPH oxidase 4                                      | NOX4     | Q9NPH5 | 0.097874534 |
| Wogonin | Vasopressin V2 receptor                              | AVPR2    | P30518 | 0.097874534 |
| Wogonin | NEDD8-activating enzyme E1                           | NAE1     | Q13564 | 0.097874534 |

|              |                                                  |          |        |             |
|--------------|--------------------------------------------------|----------|--------|-------------|
|              | regulatory subunit                               |          |        |             |
| Wogonin      | Butyrylcholinesterase                            | BCHE     | P06276 | 0.097874534 |
| Wogonin      | Acetylcholinesterase                             | ACHE     | P22303 | 0.097874534 |
| Wogonin      | Beta-secretase 1                                 | BACE1    | P56817 | 0.097874534 |
| Wogonin      | Phosphodiesterase 5A                             | PDE5A    | O76074 | 0.097874534 |
| Wogonin      | Glycogen synthase kinase-3 beta                  | GSK3B    | P49841 | 0.097874534 |
| Stigmasterol | Cytochrome P450 51 (by homology)                 | CYP51A1  | Q16850 | 0.66432415  |
| Stigmasterol | HMG-CoA reductase                                | HMGCR    | P04035 | 0.66432415  |
| Stigmasterol | LXR-alpha                                        | NR1H3    | Q13133 | 0.630967659 |
| Stigmasterol | Niemann-Pick C1-like protein 1                   | NPC1L1   | Q9UHC9 | 0.589276033 |
| Stigmasterol | Cytochrome P450 17A1                             | CYP17A1  | P05093 | 0.506040802 |
| Stigmasterol | Androgen Receptor                                | AR       | P10275 | 0.497676657 |
| Stigmasterol | Sterol regulatory element-binding protein 2      | SREBF2   | Q12772 | 0.45601846  |
| Stigmasterol | Cytochrome P450 19A1                             | CYP19A1  | P11511 | 0.431038563 |
| Stigmasterol | Nuclear receptor ROR-gamma                       | RORC     | P51449 | 0.356071235 |
| Stigmasterol | Estrogen receptor alpha                          | ESR1     | P03372 | 0.314405075 |
| Stigmasterol | Estrogen receptor beta                           | ESR2     | Q92731 | 0.314405075 |
| Stigmasterol | Testis-specific androgen-binding protein         | SHBG     | P04278 | 0.239432052 |
| Stigmasterol | Norepinephrine transporter                       | SLC6A2   | P23975 | 0.131155749 |
| Stigmasterol | Corticosteroid binding globulin                  | SERPINA6 | P08185 | 0.11449479  |
| Stigmasterol | Protein-tyrosine phosphatase 1B                  | PTPN1    | P18031 | 0.11449479  |
| Stigmasterol | Muscarinic acetylcholine receptor M2             | CHRM2    | P08172 | 0.11449479  |
| Stigmasterol | Nuclear receptor ROR-alpha                       | RORA     | P35398 | 0.11449479  |
| Stigmasterol | Butyrylcholinesterase                            | BCHE     | P06276 | 0.11449479  |
| Stigmasterol | Serotonin transporter                            | SLC6A4   | P31645 | 0.106165761 |
| Stigmasterol | Acetylcholinesterase                             | ACHE     | P22303 | 0.106165761 |
| Stigmasterol | Cytochrome P450 2C19                             | CYP2C19  | P33261 | 0.106165761 |
| Stigmasterol | Glucose-6-phosphate 1-dehydrogenase              | G6PD     | P11413 | 0.106165761 |
| Stigmasterol | Dual specificity phosphatase Cdc25A              | CDC25A   | P30304 | 0.106165761 |
| Stigmasterol | Carboxylesterase 2                               | CES2     | O00748 | 0.106165761 |
| Stigmasterol | LXR-beta                                         | NR1H2    | P55055 | 0.106165761 |
| Stigmasterol | Vitamin D receptor                               | VDR      | P11473 | 0.106165761 |
| Stigmasterol | Prostanoid EP1 receptor (by homology)            | PTGER1   | P34995 | 0.106165761 |
| Stigmasterol | Prostanoid EP2 receptor (by homology)            | PTGER2   | P43116 | 0.106165761 |
| Stigmasterol | 11-beta-hydroxysteroid dehydrogenase 1           | HSD11B1  | P28845 | 0.106165761 |
| Stigmasterol | Peroxisome proliferator-activated receptor delta | PPARD    | Q03181 | 0.106165761 |
| Stigmasterol | Glycine receptor subunit alpha-1                 | GLRA1    | P23415 | 0.106165761 |
| Stigmasterol | Squalene monooxygenase                           | SQLE     | Q14534 | 0.106165761 |
| Stigmasterol | Nuclear receptor subfamily 1 group I             | NR1I3    | Q14994 | 0.106165761 |



|              |                                                    |         |        |             |
|--------------|----------------------------------------------------|---------|--------|-------------|
|              | member 3 (by homology)                             |         |        |             |
| Stigmasterol | Anti-estrogen binding site (AEBS)<br>(by homology) | DHCR7   | Q9UBM7 | 0.106165761 |
| Stigmasterol | Protein-tyrosine phosphatase 1C                    | PTPN6   | P29350 | 0.106165761 |
| Stigmasterol | Glucocorticoid receptor                            | NR3C1   | P04150 | 0.106165761 |
| Stigmasterol | Thromboxane-A synthase                             | TBXAS1  | P24557 | 0.106165761 |
| Stigmasterol | Glucagon receptor                                  | GCGR    | P47871 | 0.106165761 |
| Stigmasterol | Nitric oxide synthase, inducible (by<br>homology)  | NOS2    | P35228 | 0.106165761 |
| Stigmasterol | 11-beta-hydroxysteroid dehydrogenase 2             | HSD11B2 | P80365 | 0.106165761 |
| Stigmasterol | DNA polymerase beta (by homology)                  | POLB    | P06746 | 0.106165761 |
| Isorhamnetin | Xanthine dehydrogenase                             | XDH     | P47989 | 1           |
| Isorhamnetin | Carbonic anhydrase II                              | CA2     | P00918 | 1           |
| Isorhamnetin | Carbonic anhydrase VII                             | CA7     | P43166 | 1           |
| Isorhamnetin | Carbonic anhydrase XII                             | CA12    | Q43570 | 1           |
| Isorhamnetin | Carbonic anhydrase IV                              | CA4     | P22748 | 1           |
| Isorhamnetin | Cytochrome P450 1B1                                | CYP1B1  | Q16678 | 1           |
| Isorhamnetin | Multidrug resistance-associated protein 1          | ABCC1   | P33527 | 0.443225384 |
| Isorhamnetin | NADPH oxidase 4                                    | NOX4    | Q9NPH5 | 0.409770184 |
| Isorhamnetin | Aldose reductase                                   | AKR1B1  | P15121 | 0.401570421 |
| Isorhamnetin | ATP-binding cassette sub-family G<br>member 2      | ABCG2   | Q9UNQ0 | 0.284878497 |
| Isorhamnetin | Acetylcholinesterase                               | ACHE    | P22303 | 0.284878497 |
| Isorhamnetin | Arachidonate 15-lipoxygenase                       | ALOX15  | P16050 | 0.284878497 |
| Isorhamnetin | Arachidonate 12-lipoxygenase                       | ALOX12  | P18054 | 0.284878497 |
| Isorhamnetin | Insulin-like growth factor I receptor              | IGF1R   | P08069 | 0.268235117 |
| Isorhamnetin | Epidermal growth factor receptor erbB1             | EGFR    | P00533 | 0.268235117 |
| Isorhamnetin | Vasopressin V2 receptor                            | AVPR2   | P30518 | 0.259910104 |
| Isorhamnetin | Monoamine oxidase A                                | MAOA    | P21397 | 0.259910104 |
| Isorhamnetin | Tyrosine-protein kinase receptor FLT3              | FLT3    | P36888 | 0.259910104 |
| Isorhamnetin | Cytochrome P450 19A1                               | CYP19A1 | P11511 | 0.259910104 |
| Isorhamnetin | Thrombin                                           | F2      | P00734 | 0.259910104 |
| Isorhamnetin | Serine/threonine-protein kinase PIM1               | PIM1    | P11309 | 0.259910104 |
| Isorhamnetin | Arachidonate 5-lipoxygenase                        | ALOX5   | P09917 | 0.259910104 |
| Isorhamnetin | Serine/threonine-protein kinase<br>Aurora-B        | AURKB   | Q96GD4 | 0.259910104 |
| Isorhamnetin | Dopamine D4 receptor                               | DRD4    | P21917 | 0.259910104 |
| Isorhamnetin | Adenosine A1 receptor (by<br>homology)             | ADORA1  | P30542 | 0.259910104 |
| Isorhamnetin | Glyoxalase I                                       | GLO1    | Q04760 | 0.259910104 |
| Isorhamnetin | Myeloperoxidase                                    | MPO     | P05164 | 0.259910104 |
| Isorhamnetin | PI3-kinase p85-alpha subunit                       | PIK3R1  | P27986 | 0.259910104 |
| Isorhamnetin | Adenosine A2a receptor (by                         | ADORA2A | P29274 | 0.259910104 |

|              |                                                         |         |        |             |
|--------------|---------------------------------------------------------|---------|--------|-------------|
|              | homology)                                               |         |        |             |
| Isorhamnetin | Death-associated protein kinase 1                       | DAPK1   | P53355 | 0.259910104 |
| Isorhamnetin | Liver glycogen phosphorylase                            | PYGL    | P06737 | 0.259910104 |
| Isorhamnetin | Carbonic anhydrase I                                    | CA1     | P00915 | 0.259910104 |
| Isorhamnetin | Glycogen synthase kinase-3 beta                         | GSK3B   | P49841 | 0.259910104 |
| Isorhamnetin | Tyrosine-protein kinase SRC                             | SRC     | P12931 | 0.259910104 |
| Isorhamnetin | Focal adhesion kinase 1                                 | PTK2    | Q05397 | 0.259910104 |
| Isorhamnetin | Estradiol 17-beta-dehydrogenase 2                       | HSD17B2 | P37059 | 0.259910104 |
| Isorhamnetin | Vascular endothelial growth factor<br>receptor 2        | KDR     | P35968 | 0.259910104 |
| Isorhamnetin | Matrix metalloproteinase 13                             | MMP13   | P45452 | 0.259910104 |
| Isorhamnetin | Matrix metalloproteinase 3                              | MMP3    | P08254 | 0.259910104 |
| Isorhamnetin | Carbonic anhydrase III                                  | CA3     | P07451 | 0.259910104 |
| Isorhamnetin | Serine/threonine-protein kinase PLK1                    | PLK1    | P53350 | 0.259910104 |
| Isorhamnetin | Carbonic anhydrase VI                                   | CA6     | P23280 | 0.259910104 |
| Isorhamnetin | Cyclin-dependent kinase 1                               | CDK1    | P06493 | 0.259910104 |
| Isorhamnetin | Matrix metalloproteinase 9                              | MMP9    | P14780 | 0.259910104 |
| Isorhamnetin | Matrix metalloproteinase 2                              | MMP2    | P08253 | 0.259910104 |
| Isorhamnetin | Protein kinase N1                                       | PKN1    | Q16512 | 0.259910104 |
| Isorhamnetin | Carbonic anhydrase XIV                                  | CA14    | Q9ULX7 | 0.259910104 |
| Isorhamnetin | Carbonic anhydrase IX                                   | CA9     | Q16790 | 0.259910104 |
| Isorhamnetin | Casein kinase II alpha                                  | CSNK2A1 | P68400 | 0.259910104 |
| Isorhamnetin | Hepatocyte growth factor receptor                       | MET     | P08581 | 0.259910104 |
| Isorhamnetin | Serine/threonine-protein kinase NEK2                    | NEK2    | P51955 | 0.259910104 |
| Isorhamnetin | Interleukin-8 receptor A                                | CXCR1   | P25024 | 0.259910104 |
| Isorhamnetin | CaM kinase II beta                                      | CAMK2B  | Q13554 | 0.259910104 |
| Isorhamnetin | ALK tyrosine kinase receptor                            | ALK     | Q9UM73 | 0.259910104 |
| Isorhamnetin | Serine/threonine-protein kinase AKT                     | AKT1    | P31749 | 0.259910104 |
| Isorhamnetin | P-glycoprotein 1                                        | ABCB1   | P08183 | 0.259910104 |
| Isorhamnetin | Serine/threonine-protein kinase NEK6                    | NEK6    | Q9HC98 | 0.259910104 |
| Isorhamnetin | Phospholipase A2 group 1B                               | PLA2G1B | P04054 | 0.259910104 |
| Isorhamnetin | Carbonic anhydrase VA                                   | CA5A    | P35218 | 0.259910104 |
| Isorhamnetin | Beta-secretase 1                                        | BACE1   | P56817 | 0.259910104 |
| Isorhamnetin | Tyrosine-protein kinase receptor UFO                    | AXL     | P30530 | 0.259910104 |
| Isorhamnetin | NUAK family SNF1-like kinase 1                          | NUAK1   | O60285 | 0.259910104 |
| Isorhamnetin | Aldo-keto reductase family 1 member<br>C2 (by homology) | AKR1C2  | P52895 | 0.259910104 |
| Isorhamnetin | Aldo-keto reductase family 1 member<br>C1 (by homology) | AKR1C1  | Q04828 | 0.259910104 |
| Isorhamnetin | Aldo-keto-reductase family 1 member<br>C3 (by homology) | AKR1C3  | P42330 | 0.259910104 |
| Isorhamnetin | Aldo-keto reductase family 1 member<br>C4 (by homology) | AKR1C4  | P17516 | 0.259910104 |

|              |                                                             |                           |                                   |             |
|--------------|-------------------------------------------------------------|---------------------------|-----------------------------------|-------------|
| Isorhamnetin | Carbonic anhydrase XIII (by homology)                       | CA13                      | Q8N1Q1                            | 0.259910104 |
| Isorhamnetin | Aldehyde reductase (by homology)                            | AKR1A1                    | P14550                            | 0.259910104 |
| Isorhamnetin | G-protein coupled receptor 35                               | GPR35                     | Q9HC97                            | 0.243267208 |
| Isorhamnetin | Microtubule-associated protein tau                          | MAPT                      | P10636                            | 0.201601849 |
| Isorhamnetin | Lysine-specific demethylase 4D-like                         | KDM4E                     | B2RXH2                            | 0.201601849 |
| Isorhamnetin | DNA topoisomerase II alpha                                  | TOP2A                     | P11388                            | 0.201601849 |
| Isorhamnetin | Insulin receptor                                            | INSR                      | P06213                            | 0.201601849 |
| Isorhamnetin | Myosin light chain kinase, smooth muscle                    | MYLK                      | Q15746                            | 0.201601849 |
| Isorhamnetin | Tyrosine-protein kinase SYK                                 | SYK                       | P43405                            | 0.201601849 |
| Isorhamnetin | PI3-kinase p110-gamma subunit                               | PIK3CG                    | P48736                            | 0.201601849 |
| Isorhamnetin | DNA-(apurinic or apyrimidinic site) lyase                   | APEX1                     | P27695                            | 0.201601849 |
| Isorhamnetin | Cyclin-dependent kinase 5/CDK5 activator 1                  | CDK5R1 CDK5               | Q15078 Q00535                     | 0.193269571 |
| Isorhamnetin | Cyclin-dependent kinase 1/cyclin B                          | CCNB3 CDK1<br>CCNB1 CCNB2 | Q8WWL7<br>P06493 P14635<br>O95067 | 0.193269571 |
| Isorhamnetin | Cyclin-dependent kinase 6                                   | CDK6                      | Q00534                            | 0.193269571 |
| Isorhamnetin | Cyclin-dependent kinase 2                                   | CDK2                      | P24941                            | 0.193269571 |
| Isorhamnetin | Arginase-1 (by homology)                                    | ARG1                      | P05089                            | 0.193269571 |
| Isorhamnetin | Beta amyloid A4 protein                                     | APP                       | P05067                            | 0.184930052 |
| Isorhamnetin | Induced myeloid leukemia cell differentiation protein Mcl-1 | MCL1                      | Q07820                            | 0.134939009 |
| Isorhamnetin | Telomerase reverse transcriptase                            | TERT                      | O14746                            | 0.134939009 |
| Isorhamnetin | Tyrosinase                                                  | TYR                       | P14679                            | 0.126610169 |
| Isorhamnetin | Estradiol 17-beta-dehydrogenase 1                           | HSD17B1                   | P14061                            | 0.126610169 |
| Isorhamnetin | Aryl hydrocarbon receptor                                   | AHR                       | P35869                            | 0.126610169 |
| Isorhamnetin | Estrogen-related receptor alpha                             | ESRRA                     | P11474                            | 0.126610169 |
| Isorhamnetin | Receptor-type tyrosine-protein phosphatase S                | PTPRS                     | Q13332                            | 0.126610169 |
| Isorhamnetin | Plasminogen                                                 | PLG                       | P00747                            | 0.126610169 |
| Isorhamnetin | Estrogen receptor beta                                      | ESR2                      | Q92731                            | 0.118277085 |
| Isorhamnetin | DNA-3-methyladenine glycosylase                             | MPG                       | P29372                            | 0.118277085 |
| Isorhamnetin | Solute carrier family 22 member 12                          | SLC22A12                  | Q96S37                            | 0.118277085 |
| Isorhamnetin | Poly [ADP-ribose] polymerase-1                              | PARP1                     | P09874                            | 0.10994577  |
| Isorhamnetin | Transthyretin                                               | TTR                       | P02766                            | 0.10994577  |
| Isorhamnetin | Matrix metalloproteinase 12                                 | MMP12                     | P39900                            | 0.10994577  |
| Isorhamnetin | Lymphocyte differentiation antigen CD38                     | CD38                      | P28907                            | 0.10994577  |
| Isorhamnetin | Aldo-keto reductase family 1 member B10                     | AKR1B10                   | O60218                            | 0.10994577  |

|              |                                                            |                           |                                   |             |
|--------------|------------------------------------------------------------|---------------------------|-----------------------------------|-------------|
| Isorhamnetin | Tankyrase-2                                                | TNKS2                     | Q9H2K2                            | 0.10994577  |
| Baicalein    | Lysine-specific demethylase 4D-like                        | KDM4E                     | B2RXH2                            | 1           |
| Baicalein    | Xanthine dehydrogenase                                     | XDH                       | P47989                            | 1           |
| Baicalein    | Arachidonate 15-lipoxygenase                               | ALOX15                    | P16050                            | 1           |
| Baicalein    | Cyclin-dependent kinase 1                                  | CDK1                      | P06493                            | 1           |
| Baicalein    | Arachidonate 12-lipoxygenase                               | ALOX12                    | P18054                            | 1           |
| Baicalein    | G protein-coupled receptor kinase 6                        | GRK6                      | P43250                            | 1           |
| Baicalein    | Cytochrome P450 19A1                                       | CYP19A1                   | P11511                            | 0.436430316 |
| Baicalein    | Carbonic anhydrase VII                                     | CA7                       | P43166                            | 0.346270483 |
| Baicalein    | Carbonic anhydrase XII                                     | CA12                      | O43570                            | 0.346270483 |
| Baicalein    | Carbonic anhydrase IV                                      | CA4                       | P22748                            | 0.346270483 |
| Baicalein    | P-glycoprotein 1                                           | ABCB1                     | P08183                            | 0.346270483 |
| Baicalein    | Cytochrome P450 1B1                                        | CYP1B1                    | Q16678                            | 0.346270483 |
| Baicalein    | Estradiol 17-beta-dehydrogenase 1                          | HSD17B1                   | P14061                            | 0.33811031  |
| Baicalein    | Aldose reductase                                           | AKR1B1                    | P15121                            | 0.329868485 |
| Baicalein    | Cyclin-dependent kinase 5/CDK5<br>activator 1              | CDK5R1 CDK5               | Q15078 Q00535                     | 0.329868485 |
| Baicalein    | Carbonic anhydrase II                                      | CA2                       | P00918                            | 0.329868485 |
| Baicalein    | Cyclin-dependent kinase 1/cyclin B                         | CCNB3 CDK1<br>CCNB1 CCNB2 | Q8WWL7<br>P06493 P14635<br>O95067 | 0.329868485 |
| Baicalein    | Cyclin-dependent kinase 6                                  | CDK6                      | Q00534                            | 0.329868485 |
| Baicalein    | Carbonic anhydrase I                                       | CA1                       | P00915                            | 0.329868485 |
| Baicalein    | Carbonic anhydrase IX                                      | CA9                       | Q16790                            | 0.329868485 |
| Baicalein    | ATP-binding cassette sub-family G<br>member 2              | ABCG2                     | Q9UNQ0                            | 0.329868485 |
| Baicalein    | Carbonyl reductase [NADPH] 1                               | CBR1                      | P16152                            | 0.329868485 |
| Baicalein    | Estrogen receptor beta                                     | ESR2                      | Q92731                            | 0.264392858 |
| Baicalein    | Estrogen receptor alpha                                    | ESR1                      | P03372                            | 0.25622784  |
| Baicalein    | Acetylcholinesterase                                       | ACHE                      | P22303                            | 0.247942823 |
| Baicalein    | Adenosine A1 receptor (by<br>homology)                     | ADORA1                    | P30542                            | 0.247942823 |
| Baicalein    | Adenosine A2a receptor (by<br>homology)                    | ADORA2A                   | P29274                            | 0.247942823 |
| Baicalein    | Cyclooxygenase-2                                           | PTGS2                     | P35354                            | 0.247942823 |
| Baicalein    | Receptor-type tyrosine-protein<br>phosphatase S            | PTPRS                     | Q13332                            | 0.239574696 |
| Baicalein    | AMY1C                                                      | AMY1A                     | P04745                            | 0.239574696 |
| Baicalein    | Tyrosine-protein kinase receptor FLT3                      | FLT3                      | P36888                            | 0.231637185 |
| Baicalein    | Inhibitor of nuclear factor kappa B<br>kinase beta subunit | IKBKB                     | O14920                            | 0.215238178 |
| Baicalein    | Neurotrophic tyrosine kinase receptor<br>type 2            | NTRK2                     | Q16620                            | 0.215238178 |

|           |                                                        |         |        |             |
|-----------|--------------------------------------------------------|---------|--------|-------------|
| Baicalein | Androgen Receptor                                      | AR      | P10275 | 0.182484829 |
| Baicalein | NADPH oxidase 4                                        | NOX4    | Q9NPH5 | 0.174270753 |
| Baicalein | Monoamine oxidase A                                    | MAOA    | P21397 | 0.174270753 |
| Baicalein | Tyrosine-protein kinase SYK                            | SYK     | P43405 | 0.174270753 |
| Baicalein | Glycogen synthase kinase-3 beta                        | GSK3B   | P49841 | 0.174270753 |
| Baicalein | Multidrug resistance-associated protein 1              | ABCC1   | P33527 | 0.174270753 |
| Baicalein | Transthyretin                                          | TTR     | P02766 | 0.174270753 |
| Baicalein | Casein kinase II alpha                                 | CSNK2A1 | P68400 | 0.174270753 |
| Baicalein | Cystic fibrosis transmembrane conductance regulator    | CFTR    | P13569 | 0.174270753 |
| Baicalein | Aldo-keto reductase family 1 member B10                | AKR1B10 | O60218 | 0.174270753 |
| Baicalein | Tankyrase-2                                            | TNKS2   | Q9H2K2 | 0.174270753 |
| Baicalein | Tankyrase-1                                            | TNKS    | O95271 | 0.174270753 |
| Baicalein | Estradiol 17-beta-dehydrogenase 2                      | HSD17B2 | P37059 | 0.157929217 |
| Baicalein | Butyrylcholinesterase                                  | BCHE    | P06276 | 0.157929217 |
| Baicalein | Adenosine A3 receptor                                  | ADORA3  | P0DMS8 | 0.157929217 |
| Baicalein | Telomerase reverse transcriptase                       | TERT    | O14746 | 0.149732594 |
| Baicalein | Tyrosine-protein kinase LCK                            | LCK     | P06239 | 0.149732594 |
| Baicalein | 6-phosphofructo-2-kinase/fructose-2,6-bisphosphatase 3 | PFKFB3  | Q16875 | 0.141522086 |
| Baicalein | Serine/threonine-protein kinase PIM1                   | PIM1    | P11309 | 0.141522086 |
| Baicalein | Poly [ADP-ribose] polymerase-1                         | PARP1   | P09874 | 0.125142649 |
| Baicalein | Arachidonate 5-lipoxygenase                            | ALOX5   | P09917 | 0.125142649 |
| Baicalein | Beta amyloid A4 protein                                | APP     | P05067 | 0.125142649 |
| Baicalein | Calmodulin                                             | CALM1   | P62158 | 0.125142649 |
| Baicalein | Arginase-1 (by homology)                               | ARG1    | P05089 | 0.125142649 |
| Baicalein | Nitric oxide synthase, inducible (by homology)         | NOS2    | P35228 | 0.116965063 |
| Baicalein | Glyoxalase I                                           | GLO1    | Q04760 | 0.116965063 |
| Baicalein | Matrix metalloproteinase 9                             | MMP9    | P14780 | 0.116965063 |
| Baicalein | Matrix metalloproteinase 2                             | MMP2    | P08253 | 0.116965063 |
| Baicalein | Matrix metalloproteinase 12                            | MMP12   | P39900 | 0.116965063 |
| Baicalein | Lymphocyte differentiation antigen CD38                | CD38    | P28907 | 0.116965063 |
| Baicalein | DNA topoisomerase I (by homology)                      | TOP1    | P11387 | 0.116965063 |
| Baicalein | NEDD8-activating enzyme E1 regulatory subunit          | NAE1    | Q13564 | 0.108770969 |
| Baicalein | Epidermal growth factor receptor erbB1                 | EGFR    | P00533 | 0.108770969 |
| Baicalein | Tyrosine-protein kinase SRC                            | SRC     | P12931 | 0.108770969 |
| Baicalein | Tyrosinase                                             | TYR     | P14679 | 0.108770969 |
| Baicalein | Aryl hydrocarbon receptor                              | AHR     | P35869 | 0.108770969 |
| Baicalein | Estrogen-related receptor alpha                        | ESRRA   | P11474 | 0.108770969 |

|              |                                                   |          |        |             |
|--------------|---------------------------------------------------|----------|--------|-------------|
| Baicalein    | Stem cell growth factor receptor                  | KIT      | P10721 | 0.108770969 |
| Baicalein    | Delta opioid receptor                             | OPRD1    | P41143 | 0.108770969 |
| Baicalein    | Cytochrome P450 1A1                               | CYP1A1   | P04798 | 0.108770969 |
| Baicalein    | Serine/threonine-protein kinase<br>Aurora-B       | AURKB    | Q96GD4 | 0.108770969 |
| Baicalein    | PI3-kinase p110-gamma subunit                     | PIK3CG   | P48736 | 0.108770969 |
| Baicalein    | Microtubule-associated protein tau                | MAPT     | P10636 | 0.108770969 |
| Baicalein    | DNA topoisomerase II alpha                        | TOP2A    | P11388 | 0.108770969 |
| Baicalein    | Insulin receptor                                  | INSR     | P06213 | 0.108770969 |
| Baicalein    | Myosin light chain kinase, smooth<br>muscle       | MYLK     | Q15746 | 0.108770969 |
| Baicalein    | DNA-(apurinic or apyrimidinic site)<br>lyase      | APEX1    | P27695 | 0.108770969 |
| Baicalein    | Insulin-like growth factor I receptor             | IGF1R    | P08069 | 0.108770969 |
| Baicalein    | Vascular endothelial growth factor<br>receptor 2  | KDR      | P35968 | 0.100578902 |
| Baicalein    | Serine/threonine-protein kinase PLK1              | PLK1     | P53350 | 0.100578902 |
| Baicalein    | Hepatocyte growth factor receptor                 | MET      | P08581 | 0.100578902 |
| Baicalein    | ALK tyrosine kinase receptor                      | ALK      | Q9UM73 | 0.100578902 |
| Baicalein    | Tyrosine-protein kinase receptor UFO              | AXL      | P30530 | 0.100578902 |
| Baicalein    | Protein-tyrosine phosphatase 1B                   | PTPN1    | P18031 | 0.100578902 |
| Baicalein    | Beta-galactoside<br>alpha-2,6-sialyltransferase 1 | ST6GAL1  | P15907 | 0.100578902 |
| Baicalein    | Solute carrier family 22 member 12                | SLC22A12 | Q96S37 | 0.100578902 |
| Baicalein    | G-protein coupled receptor 35                     | GPR35    | Q9HC97 | 0.100578902 |
| Baicalein    | Tyrosine-protein kinase FYN                       | FYN      | P06241 | 0.100578902 |
| Baicalein    | Neurokinin 2 receptor                             | TACR2    | P21452 | 0.100578902 |
| Baicalein    | DNA-dependent protein kinase                      | PRKDC    | P78527 | 0.100578902 |
| Baicalein    | MAP kinase ERK1                                   | MAPK3    | P27361 | 0.100578902 |
| Baicalein    | Beta-secretase 1                                  | BACE1    | P56817 | 0.100578902 |
| Baicalein    | NAD-dependent deacetylase sirtuin 1               | SIRT1    | Q96EB6 | 0.100578902 |
| Baicalein    | Phospholipase A2 group IIA                        | PLA2G2A  | P14555 | 0.100578902 |
| Baicalein    | Cytosolic phospholipase A2                        | PLA2G4A  | P47712 | 0.100578902 |
| Baicalein    | Carbonic anhydrase VI                             | CA6      | P23280 | 0.100578902 |
| Baicalein    | Cyclin-dependent kinase 2                         | CDK2     | P24941 | 0.100578902 |
| Progesterone | Androgen Receptor                                 | AR       | P10275 | 1           |
| Progesterone | Mineralocorticoid receptor                        | NR3C2    | P08235 | 1           |
| Progesterone | Glucocorticoid receptor                           | NR3C1    | P04150 | 1           |
| Progesterone | Progesterone receptor                             | PGR      | P06401 | 1           |
| Progesterone | Corticosteroid binding globulin                   | SERPINA6 | P08185 | 1           |
| Progesterone | Sigma opioid receptor                             | SIGMAR1  | Q99720 | 1           |
| Progesterone | Testis-specific androgen-binding protein          | SHBG     | P04278 | 1           |
| Progesterone | Fatty acid-binding protein, liver (by             | FABP1    | P07148 | 1           |

|              |                                                                  |           |               |             |
|--------------|------------------------------------------------------------------|-----------|---------------|-------------|
|              | homology)                                                        |           |               |             |
| Progesterone | Cytochrome P450 19A1                                             | CYP19A1   | P11511        | 0.959682015 |
| Progesterone | Cytochrome P450 17A1                                             | CYP17A1   | P05093        | 0.793172399 |
| Progesterone | Estradiol 17-beta-dehydrogenase 3                                | HSD17B3   | P37058        | 0.701526478 |
| Progesterone | Steroid 5-alpha-reductase 1                                      | SRD5A1    | P18405        | 0.693214571 |
| Progesterone | Steroid 5-alpha-reductase 2                                      | SRD5A2    | P31213        | 0.693214571 |
| Progesterone | Pregnane X receptor                                              | NR1I2     | O75469        | 0.634859674 |
| Progesterone | Nuclear receptor subfamily 1 group I member 3 (by homology)      | NR1I3     | Q14994        | 0.443225384 |
| Progesterone | Niemann-Pick C1-like protein 1                                   | NPC1L1    | Q9UHC9        | 0.10994577  |
| Progesterone | C-C chemokine receptor type 5                                    | CCR5      | P51681        | 0.10994577  |
| Progesterone | 11-beta-hydroxysteroid dehydrogenase 1                           | HSD11B1   | P28845        | 0.10994577  |
| Progesterone | Estrogen receptor alpha                                          | ESR1      | P03372        | 0.10994577  |
| Progesterone | Estrogen receptor beta                                           | ESR2      | Q92731        | 0.101613855 |
| Progesterone | Dual specificity phosphatase Cdc25A                              | CDC25A    | P30304        | 0.101613855 |
| Progesterone | Protein-tyrosine phosphatase 2C                                  | PTPN11    | Q06124        | 0.101613855 |
| Progesterone | Aldo-keto reductase family 1 member B10                          | AKR1B10   | O60218        | 0.101613855 |
| Progesterone | Dopamine transporter                                             | SLC6A3    | Q01959        | 0.101613855 |
| Progesterone | MAP kinase ERK1                                                  | MAPK3     | P27361        | 0.101613855 |
| Progesterone | Adenosine A3 receptor                                            | ADORA3    | P0DMS8        | 0.101613855 |
| Progesterone | Cathepsin D                                                      | CTSD      | P07339        | 0.101613855 |
| Progesterone | Arachidonate 5-lipoxygenase                                      | ALOX5     | P09917        | 0.101613855 |
| Progesterone | Protein-tyrosine phosphatase 1B                                  | PTPN1     | P18031        | 0.101613855 |
| Progesterone | Vanilloid receptor                                               | TRPV1     | Q8NER1        | 0.101613855 |
| Progesterone | Cyclooxygenase-1                                                 | PTGS1     | P23219        | 0.101613855 |
| Progesterone | 11-beta-hydroxysteroid dehydrogenase 2                           | HSD11B2   | P80365        | 0.101613855 |
| Progesterone | Butyrylcholinesterase                                            | BCHE      | P06276        | 0.101613855 |
| Progesterone | Estradiol 17-beta-dehydrogenase 2                                | HSD17B2   | P37059        | 0.101613855 |
| Progesterone | Epoxide hydrolase 1                                              | EPHX1     | P07099        | 0.101613855 |
| Progesterone | Epoxide hydratase                                                | EPHX2     | P34913        | 0.101613855 |
| Progesterone | Nitric oxide synthase, inducible                                 | NOS2      | P35228        | 0.101613855 |
| Progesterone | Prostaglandin E synthase                                         | PTGES     | O14684        | 0.101613855 |
| Progesterone | Protein farnesyltransferase                                      | FNTA FNTB | P49354 P49356 | 0.101613855 |
| Progesterone | Squalene synthetase (by homology)                                | FDFT1     | P37268        | 0.101613855 |
| Progesterone | Transient receptor potential cation channel subfamily A member 1 | TRPA1     | O75762        | 0.101613855 |
| Progesterone | Melatonin receptor 1A                                            | MTNR1A    | P48039        | 0.101613855 |
| Progesterone | Anandamide amidohydrolase                                        | FAAH      | O00519        | 0.101613855 |
| Progesterone | Beta-secretase 1                                                 | BACE1     | P56817        | 0.101613855 |
| Progesterone | Melatonin receptor 1B                                            | MTNR1B    | P49286        | 0.101613855 |
| Progesterone | Aldehyde dehydrogenase                                           | ALDH2     | P05091        | 0.101613855 |
| Progesterone | T-cell protein-tyrosine phosphatase                              | PTPN2     | P17706        | 0.101613855 |

|              |                                                          |          |        |             |
|--------------|----------------------------------------------------------|----------|--------|-------------|
| Progesterone | Carboxylesterase 2                                       | CES2     | O00748 | 0.101613855 |
| Progesterone | Heat shock protein HSP 90-alpha                          | HSP90AA1 | P07900 | 0.101613855 |
| Progesterone | c-Jun N-terminal kinase 3                                | MAPK10   | P53779 | 0.101613855 |
| Progesterone | Protein-tyrosine phosphatase 1C                          | PTPN6    | P29350 | 0.101613855 |
| Progesterone | Poly [ADP-ribose] polymerase-1                           | PARP1    | P09874 | 0.101613855 |
| Progesterone | Kappa Opioid receptor                                    | OPRK1    | P41145 | 0.101613855 |
| Progesterone | Glucose-6-phosphate 1-dehydrogenase                      | G6PD     | P11413 | 0.101613855 |
| Progesterone | Cathepsin K                                              | CTSK     | P43235 | 0.101613855 |
| Progesterone | Cathepsin L                                              | CTSL     | P07711 | 0.101613855 |
| Progesterone | Cathepsin (B and K)                                      | CTSB     | P07858 | 0.101613855 |
| Progesterone | Cell division protein kinase 8                           | CDK8     | P49336 | 0.101613855 |
| Progesterone | Protein kinase C eta                                     | PRKCH    | P24723 | 0.101613855 |
| Progesterone | P2X purinoceptor 7                                       | P2RX7    | Q99572 | 0.101613855 |
| Progesterone | Prolyl endopeptidase                                     | PREP     | P48147 | 0.101613855 |
| Progesterone | Voltage-gated T-type calcium channel<br>alpha-1H subunit | CACNA1H  | O95180 | 0.101613855 |
| Progesterone | Quinone reductase 2                                      | NQO2     | P16083 | 0.101613855 |
| Progesterone | Heat shock protein HSP 90-beta                           | HSP90AB1 | P08238 | 0.101613855 |



Table S7. Related information of protoligand molecular docking model

| <b>Protein name</b> | <b>PDB ID</b> | <b>Active pocket radius/Å</b> | <b>The coordinates of the protein active pocket</b> |
|---------------------|---------------|-------------------------------|-----------------------------------------------------|
| <b>AR</b>           | 1USO          | 12.2                          | 20.418364, -5.293226, 26.101062                     |
| <b>PTGS2</b>        | 3NT1          | 14.6                          | -27.997788, -38.615389, -19.328831                  |
| <b>IL1B</b>         | 5R89          | 5                             | 25.121061, 18.236252, 65.409368                     |
| <b>IL6</b>          | 1ALU          | 8.3                           | 2.003280, -25.670248, -0.789526                     |
| <b>TNF</b>          | 5UUI          | 7.1                           | 49.985876, 63.962863, 11.841002                     |

Table S8. Molecular docking scores analysis by Discovery Studio

| Compound              | LibDock scores |         |         |         |         |
|-----------------------|----------------|---------|---------|---------|---------|
|                       | AR             | PTGS2   | IL1B    | IL6     | TNF     |
| quercetin             | 137.03         | 101.294 | 84.0713 | 84.2372 | 110.835 |
| kaempferol            | 134.9          | 104.09  | 85.2568 | 91.1699 | 106.588 |
| Stigmasterol          | 121.144        | 94.1382 | /       | 68.3086 | 98.7019 |
| beta-sitosterol       | 121.758        | 140.585 | /       | /       | 98.1174 |
| isorhamnetin          | 134.178        | 103.473 | 85.0758 | 83.0359 | 104.345 |
| Progesterone          | 74.1944        | 98.745  | 66.9224 | /       | 91.9283 |
| luteolin              | 139.523        | 120.932 | 85.4176 | 86.1097 | 110.979 |
| baicalein             | 136.342        | /       | 79.2261 | 87.5609 | 110.037 |
| wogonin               | 109.517        | 87.9118 | 72.0776 | 84.4075 | 100.678 |
| dihydrotanshinlactone | 107.82         | 121.81  | 73.1062 | 68.8047 | 103.668 |

Table S9. Related information of protoligand molecular docking model

| <b>Protein name</b> | <b>PDB ID</b> | <b>Active pocket radius/Å</b> | <b>The coordinates of the protein active pocket</b> |
|---------------------|---------------|-------------------------------|-----------------------------------------------------|
| <b>IL-18</b>        | 4R6U          | 10.6                          | 265.174474, 9.828204, 95.977258                     |
| <b>NLRP3</b>        | 7ALV          | 11.8                          | 19.125478, 35.167850, 126.254818                    |
| <b>GSDMD</b>        | 5NH1          | 5.2                           | 17.601113, 107.516562, 8.362891                     |
| <b>NF-Kb p65</b>    | 1LE5          | 14.4                          | 128.071964, 14.118530, -16.898388                   |
| <b>Caspase-1</b>    | 6F6R          | 6.7                           | 8.505765, 21.073530, -1.333085                      |

Table S10. Molecular docking scores analysis by Discovery Studio

| Compound              | LibDock scores |           |         |         |           |
|-----------------------|----------------|-----------|---------|---------|-----------|
|                       | IL-18          | Caspase-1 | NLRP3   | GSDMD   | NF-Kb p65 |
| quercetin             | 94.4259        | 100.195   | 102.162 | 104.408 | 80.3894   |
| kaempferol            | 97.686         | 92.1402   | 98.5737 | 101.483 | 94.7585   |
| Stigmasterol          | 92.0037        | /         | 110.446 | /       | 72.1548   |
| beta-sitosterol       | 93.3515        | /         | 112.666 | /       | 69.2155   |
| isorhamnetin          | 95.8683        | 92.1954   | 100.213 | 101.034 | 81.9769   |
| Progesterone          | 92.7352        | 74.4929   | 93.1012 | /       | /         |
| luteolin              | 103.044        | 98.593    | 97.9391 | 112.726 | 76.4394   |
| baicalein             | 87.3572        | 96.0749   | 91.8883 | 103.946 | /         |
| wogonin               | 84.6925        | 89.9038   | 87.8726 | 96.6235 | 77.7058   |
| dihydrotanshinlactone | 90.4016        | 96.469    | 91.2403 | 96.3278 | /         |
